# Supplementary material for: Integrated transcriptome and translatome analyses reveal the early regulatory network of Brassica napus roots in response to the growth-promoting rhizobacterium Pseudomonas simiae WCS417
Source: Research Square preprint supplement (doi:10.21203/rs.3.rs-7990582/v1), 2025-11-13
Supplement: Supplementary file 1 [file 0c4d5aea6429b64eb690e5df.xlsx]

## Sheet: DEGS-GO
Table S4. significants GO items enrichment of RNA-seq differential translation expressed genes.
ONTOLOGY	ID	Description	GeneRatio	BgRatio	pvalue	p.adjust	qvalue	geneID	Count	change	group	ordered
BP	GO:0010104	regulation of ethylene-activated signaling pathway	15/622	98/62797	6.28710322431416e-14	9.96056782252057e-12	7.47834383523684e-12	BnaC09G0054400ZS/BnaA06G0336300ZS/BnaC08G0009600ZS/BnaC04G0577200ZS/BnaA04G0260000ZS/BnaC04G0308100ZS/BnaA04G0035900ZS/BnaC03G0795800ZS/BnaC03G0410900ZS/BnaC01G0433800ZS/BnaA08G0015900ZS/BnaA03G0340700ZS/BnaC03G0035500ZS/BnaC01G0363300ZS/BnaA01G0294600ZS	15	down	30m VS ctrl	1
BP	GO:0002252	immune effector process	20/622	296/62797	2.75595688099266e-11	3.3959513122454e-09	2.54966303259087e-09	BnaC09G0247600ZS/BnaC06G0453200ZS/BnaA07G0385400ZS/BnaA07G0228800ZS/BnaA02G0239700ZS/BnaC04G0308100ZS/BnaA04G0035900ZS/BnaC03G0795800ZS/BnaC03G0410900ZS/BnaC01G0433800ZS/BnaA08G0015900ZS/BnaA03G0340700ZS/BnaC03G0763000ZS/BnaC01G0070400ZS/BnaA08G0148400ZS/BnaC03G0251400ZS/BnaA06G0329700ZS/BnaA04G0144200ZS/BnaA03G0023700ZS/BnaA03G0009300ZS	20	down	30m VS ctrl	1
BP	GO:0009867	jasmonic acid mediated signaling pathway	23/622	470/62797	5.66715048099712e-10	3.92804367714113e-08	2.94915528320311e-08	BnaC09G0247600ZS/BnaC08G0104600ZS/BnaC06G0340800ZS/BnaC05G0259000ZS/BnaA09G0412500ZS/BnaC04G0577200ZS/BnaA04G0260000ZS/BnaC04G0308100ZS/BnaA04G0035900ZS/BnaC04G0015700ZS/BnaC03G0264000ZS/BnaC03G0795800ZS/BnaC03G0410900ZS/BnaC01G0433800ZS/BnaA08G0015900ZS/BnaA03G0340700ZS/BnaC03G0251400ZS/BnaC03G0192400ZS/BnaA03G0166200ZS/BnaC03G0035500ZS/BnaA07G0141400ZS/BnaA05G0486300ZS/BnaA01G0211400ZS	23	down	30m VS ctrl	1
BP	GO:0009734	auxin-activated signaling pathway	16/622	322/62797	1.91187473821172e-07	5.8730954751127e-06	4.40949031447406e-06	BnaC07G0538600ZS/BnaC03G0686900ZS/BnaA08G0186900ZS/BnaC07G0537000ZS/BnaA03G0561500ZS/BnaC07G0386400ZS/BnaC01G0271000ZS/BnaA09G0468500ZS/BnaA01G0214800ZS/BnaC04G0552400ZS/BnaA04G0236900ZS/BnaC03G0746800ZS/BnaC02G0456100ZS/BnaA09G0396200ZS/BnaA07G0141400ZS/BnaC03G0345800ZS/BnaA04G0222600ZS/BnaA03G0287800ZS	16	down	30m VS ctrl	1
BP	GO:0002237	response to molecule of bacterial origin	11/622	176/62797	1.72903005634766e-06	3.99477985935325e-05	2.99926047055045e-05	Bnascaffold2836G0000100ZS/Bnascaffold2771G0000100ZS/BnaC06G0453200ZS/BnaA07G0385400ZS/BnaA07G0228800ZS/BnaA02G0239700ZS/BnaC03G0763000ZS/BnaC01G0070400ZS/BnaA08G0148400ZS/BnaA06G0329700ZS/BnaA05G0106900ZS	11	down	30m VS ctrl	1
BP	GO:0032101	regulation of response to external stimulus	16/622	387/62797	2.14548708183974e-06	4.85580647706178e-05	3.64571489094573e-05	BnaC08G0104600ZS/BnaC07G0216700ZS/BnaC06G0453200ZS/BnaA07G0385400ZS/BnaA07G0228800ZS/BnaA02G0239700ZS/BnaC06G0368200ZS/BnaC02G0246900ZS/BnaA07G0316900ZS/BnaA02G0186600ZS/BnaC03G0763000ZS/BnaC01G0070400ZS/BnaA08G0148400ZS/BnaA07G0141400ZS/BnaA06G0329700ZS/BnaA04G0109300ZS	16	down	30m VS ctrl	1
BP	GO:2000280	regulation of root development	11/622	300/62797	0.00023297	0.00213524	0.00160313	BnaC09G0621400ZS/BnaC09G0602900ZS/BnaA10G0284600ZS/BnaC07G0462900ZS/BnaC06G0340800ZS/BnaC04G0007200ZS/BnaC01G0103800ZS/BnaA01G0085500ZS/BnaA09G0396200ZS/BnaA04G0298800ZS/BnaA02G0116700ZS	11	down	30m VS ctrl	1
BP	GO:0006417	regulation of translation	10/622	354/62797	0.00308125	0.0199831	0.0150032	BnaC09G0449600ZS/BnaC02G0109300ZS/BnaA10G0165800ZS/BnaA02G0090700ZS/BnaC08G0259500ZS/BnaA08G0247900ZS/BnaC03G0600600ZS/BnaA06G0190900ZS/BnaA05G0387200ZS/BnaA01G0420800ZS	10	down	30m VS ctrl	1
BP	GO:0002218	activation of innate immune response	8/622	283/62797	0.00769394	0.0421765	0.0316659	BnaC09G0247600ZS/BnaC04G0308100ZS/BnaA04G0035900ZS/BnaC03G0795800ZS/BnaC03G0410900ZS/BnaC01G0433800ZS/BnaA08G0015900ZS/BnaA03G0340700ZS	8	down	30m VS ctrl	1
BP	GO:0009867	jasmonic acid mediated signaling pathway	31/943	470/62797	1.09341170442016e-11	1.64886485026561e-09	1.26835757712739e-09	BnaC09G0528700ZS/BnaC03G0060300ZS/BnaC02G0054000ZS/BnaA10G0223600ZS/BnaA03G0052500ZS/BnaC06G0449500ZS/BnaC06G0391300ZS/BnaC06G0373700ZS/BnaC06G0299300ZS/BnaA07G0320600ZS/BnaA07G0266400ZS/BnaA02G0190100ZS/BnaC05G0337700ZS/BnaC03G0025200ZS/BnaC02G0021300ZS/BnaA03G0020600ZS/BnaA02G0020400ZS/BnaA10G0155700ZS/BnaA09G0618000ZS/BnaA09G0519800ZS/BnaA09G0380800ZS/BnaA07G0249100ZS/BnaA02G0213500ZS/BnaA06G0…	31	up	30m VS ctrl	1
BP	GO:0009694	jasmonic acid metabolic process	18/943	183/62797	4.42531866462159e-10	5.13336965096104e-08	3.94874588535465e-08	BnaC09G0572500ZS/BnaA10G0258400ZS/BnaA03G0026000ZS/BnaA02G0024400ZS/BnaC09G0267600ZS/BnaC09G0267300ZS/BnaA06G0393700ZS/BnaC09G0077800ZS/BnaC03G0543200ZS/BnaC02G0536400ZS/BnaA06G0285800ZS/BnaC06G0010000ZS/BnaA10G0066700ZS/BnaC03G0482200ZS/BnaC02G0379200ZS/BnaA02G0279100ZS/BnaA03G0415700ZS/BnaA02G0167200ZS	18	up	30m VS ctrl	1
BP	GO:0009850	auxin metabolic process	12/943	219/62797	0.000135429	0.00204227	0.00157098	BnaC09G0590700ZS/BnaC03G0025600ZS/BnaA10G0273300ZS/BnaA03G0021000ZS/BnaC06G0010000ZS/BnaA10G0066700ZS/BnaA10G0110000ZS/BnaA06G0190300ZS/BnaA06G0021900ZS/BnaA04G0145000ZS/BnaA03G0073500ZS/BnaA01G0008700ZS	12	up	30m VS ctrl	1
BP	GO:0032101	regulation of response to external stimulus	15/943	387/62797	0.000887836	0.00956327	0.00735636	BnaC09G0528700ZS/BnaC03G0060300ZS/BnaC02G0054000ZS/BnaA10G0223600ZS/BnaA03G0052500ZS/BnaC07G0451800ZS/BnaA03G0473300ZS/BnaC06G0010000ZS/BnaA10G0066700ZS/BnaC05G0337700ZS/BnaC03G0024200ZS/BnaC02G0054500ZS/BnaA05G0336500ZS/BnaA04G0145000ZS/BnaA04G0043400ZS	15	up	30m VS ctrl	1
BP	GO:0009695	jasmonic acid biosynthetic process	7/943	109/62797	0.00133452	0.0129836	0.00998737	BnaC09G0267600ZS/BnaC09G0267300ZS/BnaA06G0393700ZS/BnaC03G0482200ZS/BnaC02G0379200ZS/BnaA02G0279100ZS/BnaA02G0167200ZS	7	up	30m VS ctrl	1
BP	GO:0010600	regulation of auxin biosynthetic process	5/943	56/62797	0.00153263	0.0142667	0.0109744	BnaC09G0590700ZS/BnaC03G0025600ZS/BnaA10G0273300ZS/BnaA03G0021000ZS/BnaA03G0073500ZS	5	up	30m VS ctrl	1
BP	GO:1900376	regulation of secondary metabolite biosynthetic process	7/943	113/62797	0.00164321	0.0150179	0.0115523	BnaC07G0548300ZS/BnaA06G0451000ZS/BnaC07G0541600ZS/BnaA08G0192300ZS/BnaA03G0567200ZS/BnaA01G0008600ZS/BnaA02G0019300ZS	7	up	30m VS ctrl	1
BP	GO:0009404	toxin metabolic process	43/1684	259/62797	1.41342782032882e-21	5.27208576982648e-19	3.97247608450309e-19	Bnascaffold0418G0000200ZS/Bnascaffold0349G0000200ZS/BnaC03G0606500ZS/BnaA06G0184800ZS/Bnascaffold0025G0009100ZS/BnaC07G0498000ZS/BnaC01G0080800ZS/BnaA03G0519500ZS/BnaA01G0068200ZS/BnaC08G0475000ZS/BnaC05G0145000ZS/BnaA06G0117600ZS/BnaC08G0474600ZS/BnaA09G0619300ZS/BnaC08G0002800ZS/BnaC07G0541500ZS/BnaC03G0681300ZS/BnaC01G0010200ZS/BnaA08G0192100ZS/BnaA03G0567100ZS/BnaA01G0008700ZS/BnaC06G0365000Z…	43	down	30m VS ctrl	1
BP	GO:0009863	salicylic acid mediated signaling pathway	27/1684	203/62797	9.78891183804203e-12	8.00362258233884e-10	6.0306680668392e-10	BnaC09G0446700ZS/BnaC08G0484800ZS/BnaC08G0311700ZS/BnaA09G0475000ZS/BnaC08G0271200ZS/BnaA08G0240400ZS/BnaC07G0205300ZS/BnaC07G0143600ZS/BnaC05G0247500ZS/BnaA09G0422300ZS/BnaC07G0009500ZS/BnaA07G0003500ZS/BnaC05G0483600ZS/BnaC03G0390000ZS/BnaA05G0430400ZS/BnaA03G0325200ZS/BnaC05G0409000ZS/BnaC04G0346200ZS/BnaA04G0064000ZS/BnaC03G0519700ZS/BnaA06G0305100ZS/BnaC03G0024200ZS/BnaA03G0019200ZS/BnaA05G0…	27	down	30m VS ctrl	1
BP	GO:1900037	regulation of cellular response to hypoxia	5/1078	16/62797	5.5123681572099e-06	0.000135884	9.87344806103428e-05	BnaC03G0374800ZS/BnaA05G0496400ZS/BnaA05G0438100ZS/BnaA03G0312700ZS/BnaA07G0366800ZS	5	up	30m VS ctrl	1
BP	GO:0042436	indole-containing compound catabolic process	11/1684	51/62797	8.8774421146884e-08	2.5471430067529e-06	1.91925266770996e-06	BnaC08G0106300ZS/BnaC07G0541500ZS/BnaC03G0681300ZS/BnaC01G0010200ZS/BnaA08G0192100ZS/BnaA03G0567100ZS/BnaA01G0008700ZS/BnaC05G0214400ZS/BnaA09G0446200ZS/BnaA07G0113500ZS/BnaA07G0111900ZS	11	down	30m VS ctrl	1
BP	GO:0071369	cellular response to ethylene stimulus	13/943	348/62797	0.00261365	0.0225222	0.0173248	BnaC09G0577700ZS/BnaA10G0263300ZS/BnaC07G0102200ZS/BnaA07G0067900ZS/BnaC05G0459900ZS/BnaC05G0224800ZS/BnaC04G0509200ZS/BnaA04G0203300ZS/BnaC03G0393700ZS/BnaC01G0362500ZS/BnaA09G0519800ZS/BnaA07G0259300ZS/BnaA03G0431600ZS	13	up	30m VS ctrl	1
BP	GO:0009867	jasmonic acid mediated signaling pathway	53/1484	470/62797	9.06993382545356e-21	1.89788365297616e-18	1.42612775281803e-18	BnaC09G0528700ZS/BnaC09G0437700ZS/BnaA10G0155400ZS/BnaC09G0247600ZS/BnaC07G0257800ZS/BnaA09G0212800ZS/BnaA06G0417600ZS/BnaC08G0473200ZS/BnaC08G0240100ZS/BnaA08G0262000ZS/BnaC08G0251600ZS/BnaC05G0160800ZS/BnaA08G0252900ZS/BnaA06G0133300ZS/BnaC08G0104600ZS/BnaA05G0323000ZS/BnaC07G0205300ZS/BnaC02G0553100ZS/BnaA07G0141400ZS/BnaC07G0143600ZS/BnaC05G0247500ZS/BnaA09G0422300ZS/BnaA07G0094200ZS/BnaC06G0…	53	down	6h VS ctrl	2
BP	GO:0002252	immune effector process	42/1484	296/62797	1.79271038103664e-20	3.33444130872816e-18	2.50560105887578e-18	BnaC09G0584800ZS/BnaC03G0028700ZS/BnaA10G0268800ZS/BnaA03G0023700ZS/BnaC09G0247600ZS/BnaC07G0257800ZS/BnaA09G0212800ZS/BnaA06G0417600ZS/BnaC08G0446500ZS/BnaA09G0594000ZS/BnaA04G0144200ZS/BnaC07G0506200ZS/BnaC03G0763000ZS/BnaA08G0148400ZS/BnaA03G0528500ZS/BnaC07G0364000ZS/BnaA06G0329700ZS/BnaC06G0453200ZS/BnaC06G0246700ZS/BnaC02G0323100ZS/BnaA07G0385400ZS/BnaA07G0228800ZS/BnaA02G0239700ZS/BnaC05G0…	42	down	6h VS ctrl	2
BP	GO:0032101	regulation of response to external stimulus	47/1484	387/62797	6.84967383528141e-20	1.04239581820555e-17	7.83288060589597e-18	BnaC09G0594600ZS/BnaA10G0277000ZS/BnaC09G0528700ZS/BnaC09G0101500ZS/BnaC07G0216700ZS/BnaA09G0101500ZS/BnaA07G0150600ZS/BnaC08G0352000ZS/BnaC08G0104600ZS/BnaA05G0323000ZS/BnaC07G0506200ZS/BnaC03G0763000ZS/BnaA08G0148400ZS/BnaA03G0528500ZS/BnaC07G0451800ZS/BnaC07G0364000ZS/BnaA06G0329700ZS/BnaC07G0348500ZS/BnaC02G0501500ZS/BnaA09G0059200ZS/BnaA02G0375000ZS/BnaC07G0313700ZS/BnaC07G0205300ZS/BnaC02G0…	47	down	6h VS ctrl	2
BP	GO:0071369	cellular response to ethylene stimulus	42/1484	348/62797	7.93732650306204e-18	1.02208342816353e-15	7.68024710215315e-16	BnaC09G0247600ZS/BnaC07G0257800ZS/BnaA09G0212800ZS/BnaA06G0417600ZS/BnaC08G0152300ZS/BnaC01G0104800ZS/BnaA08G0105200ZS/BnaA01G0086200ZS/BnaC08G0009600ZS/BnaC07G0508000ZS/BnaC07G0433500ZS/BnaC07G0258200ZS/BnaA09G0213200ZS/BnaA06G0417500ZS/BnaC07G0144600ZS/BnaC05G0245900ZS/BnaC03G0651000ZS/BnaA09G0423300ZS/BnaA08G0213700ZS/BnaA07G0094900ZS/BnaC06G0221400ZS/BnaA09G0545800ZS/BnaA07G0210000ZS/BnaC04G0…	42	down	6h VS ctrl	2
BP	GO:0071236	cellular response to antibiotic	30/1484	270/62797	3.23862409563996e-12	2.35715510265274e-10	1.77123834978936e-10	BnaC09G0594600ZS/BnaA10G0277000ZS/BnaC08G0271200ZS/BnaA08G0240400ZS/BnaC07G0433500ZS/BnaC07G0205300ZS/BnaC02G0553100ZS/BnaA07G0141400ZS/BnaC07G0143600ZS/BnaC05G0247500ZS/BnaA09G0422300ZS/BnaA07G0094200ZS/BnaC07G0009500ZS/BnaA07G0003500ZS/BnaC06G0012100ZS/BnaC04G0577200ZS/BnaC04G0346200ZS/BnaA04G0064000ZS/BnaC03G0519700ZS/BnaA06G0305100ZS/BnaC03G0390000ZS/BnaA05G0430400ZS/BnaA03G0325200ZS/BnaC02G0…	30	down	6h VS ctrl	2
BP	GO:1900424	regulation of defense response to bacterium	21/1484	187/62797	4.57123967456352e-09	1.96211672185111e-07	1.47439444294289e-07	BnaC09G0101500ZS/BnaC07G0216700ZS/BnaA09G0101500ZS/BnaA07G0150600ZS/BnaC08G0352000ZS/BnaC07G0313700ZS/BnaC06G0281900ZS/BnaA07G0341300ZS/BnaA07G0253900ZS/BnaC04G0392100ZS/BnaA04G0109300ZS/BnaA02G0351200ZS/BnaC04G0283900ZS/BnaC03G0552300ZS/BnaA06G0278900ZS/BnaC03G0519700ZS/BnaA06G0305100ZS/BnaC02G0246900ZS/BnaA02G0186600ZS/BnaA09G0064300ZS/BnaA03G0060800ZS	21	down	6h VS ctrl	2
BP	GO:0010928	regulation of auxin mediated signaling pathway	16/1484	153/62797	8.04897455329894e-07	1.84575115098937e-05	1.38695379829737e-05	Bnascaffold0025G0032600ZS/BnaC08G0303200ZS/BnaC08G0302800ZS/BnaC07G0386400ZS/BnaC01G0271000ZS/BnaA09G0468500ZS/BnaA03G0414300ZS/BnaA01G0214800ZS/BnaC07G0205300ZS/BnaC02G0553100ZS/BnaA07G0141400ZS/BnaC05G0142600ZS/BnaA06G0115900ZS/BnaC03G0746800ZS/BnaC03G0245900ZS/BnaC01G0018900ZS	16	down	6h VS ctrl	2
BP	GO:0009695	jasmonic acid biosynthetic process	12/1484	109/62797	1.10451457204861e-05	0.00017443	0.000131072	BnaC09G0267600ZS/BnaA09G0228100ZS/BnaC09G0267300ZS/BnaC08G0473100ZS/BnaC08G0240500ZS/BnaA08G0261700ZS/BnaC08G0260600ZS/BnaA08G0247200ZS/BnaC02G0267900ZS/BnaA02G0200800ZS/BnaA07G0318400ZS/BnaA03G0389500ZS	12	down	6h VS ctrl	2
BP	GO:0006417	regulation of translation	17/1484	354/62797	0.00500677	0.0322359	0.024223	BnaC09G0449600ZS/BnaC02G0109300ZS/BnaA10G0165800ZS/BnaA02G0090700ZS/BnaC06G0406500ZS/BnaC06G0278800ZS/BnaA07G0344900ZS/BnaA07G0252200ZS/BnaC06G0164800ZS/BnaC05G0509500ZS/BnaA05G0451300ZS/BnaA01G0423400ZS/BnaC03G0600600ZS/BnaA06G0190900ZS/BnaC03G0348000ZS/BnaA03G0289800ZS/BnaA07G0069700ZS	17	down	6h VS ctrl	2
BP	GO:0042545	cell wall modification	28/1184	427/62797	1.76472323317043e-08	1.9494309315756e-06	1.51704277939212e-06	Bnascaffold0027G0040800ZS/Bnascaffold0025G0040200ZS/Bnascaffold0025G0034800ZS/Bnascaffold0027G0038900ZS/BnaC02G0439300ZS/BnaC09G0405600ZS/BnaA10G0131000ZS/BnaC08G0217600ZS/BnaA08G0278600ZS/BnaC07G0035800ZS/BnaC06G0360400ZS/BnaC02G0239200ZS/BnaC02G0238700ZS/BnaA07G0310300ZS/BnaC05G0511700ZS/BnaA05G0453600ZS/BnaC05G0219000ZS/BnaA09G0443800ZS/BnaC04G0071500ZS/BnaA05G0065000ZS/BnaA04G0254500ZS/BnaA03…	28	up	6h VS ctrl	2
BP	GO:0001678	cellular glucose homeostasis	11/1184	66/62797	4.25969369869366e-08	3.89250219948958e-06	3.02913648278419e-06	BnaC07G0362500ZS/BnaC02G0513700ZS/BnaA06G0331700ZS/BnaA02G0383700ZS/BnaC06G0022700ZS/BnaA10G0056100ZS/BnaC02G0494600ZS/BnaA06G0354300ZS/BnaA02G0368900ZS/BnaA10G0060900ZS/BnaA06G0356700ZS	11	up	6h VS ctrl	2
BP	GO:0009749	response to glucose	21/1184	265/62797	4.46333987871467e-08	3.89250219948958e-06	3.02913648278419e-06	BnaC09G0457100ZS/BnaC03G0102700ZS/BnaA10G0171200ZS/BnaA03G0090400ZS/BnaC09G0084900ZS/BnaC02G0544600ZS/BnaC08G0512600ZS/BnaC07G0362500ZS/BnaC02G0513700ZS/BnaA06G0331700ZS/BnaA02G0383700ZS/BnaC05G0346200ZS/BnaC04G0065500ZS/BnaC03G0617300ZS/BnaC03G0617200ZS/BnaA06G0177300ZS/BnaC02G0494600ZS/BnaA06G0354300ZS/BnaA02G0368900ZS/BnaA10G0060900ZS/BnaA06G0356700ZS	21	up	6h VS ctrl	2
BP	GO:0043455	regulation of secondary metabolic process	18/1184	263/62797	3.29234379399336e-06	0.000116073	9.03274613133677e-05	BnaC08G0483300ZS/BnaC05G0130700ZS/BnaA09G0625900ZS/BnaA06G0105600ZS/BnaC08G0014000ZS/BnaA10G0029300ZS/BnaA08G0313100ZS/BnaC07G0548300ZS/BnaC06G0457200ZS/BnaA07G0390300ZS/BnaC06G0086400ZS/BnaC04G0504300ZS/BnaC03G0554000ZS/BnaC01G0213000ZS/BnaA01G0165700ZS/BnaA06G0305600ZS/BnaA03G0028700ZS/BnaA02G0019300ZS	18	up	6h VS ctrl	2
BP	GO:0009851	auxin biosynthetic process	11/1184	121/62797	1.97668743670934e-05	0.000505507	0.000393384	Bnascaffold0025G0041000ZS/BnaC06G0372400ZS/BnaC02G0250300ZS/BnaC09G0052800ZS/BnaC07G0355900ZS/BnaA09G0063600ZS/BnaA06G0338300ZS/BnaC02G0078200ZS/BnaA06G0190300ZS/BnaC01G0100800ZS/BnaA01G0083200ZS	11	up	6h VS ctrl	2
BP	GO:0006757	ATP generation from ADP	12/1184	185/62797	0.000226222	0.00367499	0.00285987	BnaC09G0398100ZS/BnaC03G0133500ZS/BnaA03G0115300ZS/BnaC06G0022700ZS/BnaA10G0056100ZS/BnaC04G0340800ZS/BnaA07G0182100ZS/BnaA04G0068100ZS/BnaC01G0200700ZS/BnaA01G0157600ZS/BnaC01G0058900ZS/BnaA01G0050200ZS	12	up	6h VS ctrl	2
BP	GO:1900376	regulation of secondary metabolite biosynthetic process	9/1184	113/62797	0.000303035	0.00452368	0.00352032	BnaC08G0014000ZS/BnaA10G0029300ZS/BnaA08G0313100ZS/BnaC07G0548300ZS/BnaC04G0504300ZS/BnaC01G0213000ZS/BnaA01G0165700ZS/BnaA03G0028700ZS/BnaA02G0019300ZS	9	up	6h VS ctrl	2
BP	GO:0051156	glucose 6-phosphate metabolic process	7/1184	90/62797	0.00160069	0.016787	0.0130636	BnaC07G0153000ZS/BnaC03G0636900ZS/BnaA08G0221800ZS/BnaA07G0101100ZS/BnaC04G0340800ZS/BnaA07G0182100ZS/BnaA04G0068100ZS	7	up	6h VS ctrl	2
BP	GO:0010439	regulation of glucosinolate biosynthetic process	5/1184	55/62797	0.00377017	0.0300345	0.0233728	BnaC08G0014000ZS/BnaA10G0029300ZS/BnaA08G0313100ZS/BnaC04G0504300ZS/BnaA03G0028700ZS	5	up	6h VS ctrl	2
BP	GO:0009404	toxin metabolic process	24/1484	259/62797	1.72313585072604e-08	6.70820793980325e-07	5.04075236626101e-07	Bnascaffold0418G0000200ZS/Bnascaffold0349G0000200ZS/BnaC03G0606500ZS/BnaA06G0184800ZS/BnaC08G0475000ZS/BnaC05G0145000ZS/BnaC07G0339900ZS/BnaC04G0562300ZS/BnaC04G0080600ZS/BnaC03G0217300ZS/BnaA05G0071200ZS/BnaA04G0247200ZS/BnaA03G0185200ZS/BnaC06G0365000ZS/BnaA07G0313800ZS/BnaC03G0173100ZS/BnaA09G0446200ZS/BnaA07G0113500ZS/BnaA07G0111900ZS/BnaA08G0192100ZS/BnaA03G0567100ZS/BnaA07G0314000ZS/BnaA05G…	24	down	6h VS ctrl	2
BP	GO:0042436	indole-containing compound catabolic process	5/1484	51/62797	0.00699561	0.0405213	0.0304489	BnaA09G0446200ZS/BnaA07G0113500ZS/BnaA07G0111900ZS/BnaA08G0192100ZS/BnaA03G0567100ZS	5	down	6h VS ctrl	2
BP	GO:0009863	salicylic acid mediated signaling pathway	26/1484	203/62797	3.50312215516939e-12	2.44342770323065e-10	1.83606621729273e-10	BnaC09G0594600ZS/BnaA10G0277000ZS/BnaC08G0271200ZS/BnaA08G0240400ZS/BnaC07G0433500ZS/BnaC07G0205300ZS/BnaC02G0553100ZS/BnaA07G0141400ZS/BnaC07G0143600ZS/BnaC05G0247500ZS/BnaA09G0422300ZS/BnaA07G0094200ZS/BnaC07G0009500ZS/BnaA07G0003500ZS/BnaC06G0012100ZS/BnaC04G0577200ZS/BnaC04G0346200ZS/BnaA04G0064000ZS/BnaC03G0519700ZS/BnaA06G0305100ZS/BnaC03G0390000ZS/BnaA05G0430400ZS/BnaA03G0325200ZS/BnaA09G0…	26	down	6h VS ctrl	2
BP	GO:0009403	toxin biosynthetic process	15/1484	81/62797	7.06357240934723e-10	3.11168952980191e-08	2.3382185676371e-08	Bnascaffold0418G0000200ZS/Bnascaffold0349G0000200ZS/BnaC03G0606500ZS/BnaA06G0184800ZS/BnaC07G0339900ZS/BnaC04G0562300ZS/BnaC04G0080600ZS/BnaC03G0217300ZS/BnaA05G0071200ZS/BnaA04G0247200ZS/BnaA03G0185200ZS/BnaC03G0173100ZS/BnaA08G0192100ZS/BnaA03G0567100ZS/BnaA02G0206900ZS	15	down	6h VS ctrl	2
BP	GO:0009867	jasmonic acid mediated signaling pathway	70/1684	470/62797	3.30039314149259e-31	3.07761660444184e-28	2.31896044415401e-28	BnaC09G0528700ZS/BnaC03G0060300ZS/BnaC02G0054000ZS/BnaA10G0223600ZS/BnaA03G0052500ZS/BnaC09G0438300ZS/BnaC09G0437700ZS/BnaA10G0155400ZS/BnaC08G0484800ZS/BnaC08G0473200ZS/BnaC08G0240100ZS/BnaA09G0618000ZS/BnaA08G0262000ZS/BnaC08G0251600ZS/BnaC05G0160800ZS/BnaA08G0252900ZS/BnaA06G0133300ZS/BnaC08G0104600ZS/BnaC05G0337700ZS/BnaA05G0323000ZS/BnaC07G0257800ZS/BnaA09G0212800ZS/BnaA06G0417600ZS/BnaA02G0…	70	down	6h VS 30m	3
BP	GO:0032101	regulation of response to external stimulus	50/1684	387/62797	6.12121501812694e-20	1.55563917315439e-17	1.17216215389367e-17	BnaC09G0529900ZS/BnaC09G0528700ZS/BnaC03G0060300ZS/BnaC02G0054000ZS/BnaA10G0223600ZS/BnaA03G0052500ZS/BnaC09G0527400ZS/BnaC02G0054500ZS/BnaC09G0101500ZS/BnaC07G0216700ZS/BnaA09G0101500ZS/BnaA07G0150600ZS/BnaC09G0047200ZS/BnaC02G0501500ZS/BnaA09G0059200ZS/BnaA02G0375000ZS/BnaC08G0352000ZS/BnaC08G0104600ZS/BnaC05G0337700ZS/BnaA05G0323000ZS/BnaC07G0506200ZS/BnaA03G0528500ZS/BnaC07G0451800ZS/BnaA03G0…	50	down	6h VS 30m	3
BP	GO:0002252	immune effector process	30/1684	296/62797	6.59387625282312e-10	3.21605955509276e-08	2.42327614282423e-08	BnaC09G0584800ZS/BnaC03G0028700ZS/BnaC08G0446500ZS/BnaC04G0435300ZS/BnaA09G0594000ZS/BnaA04G0144200ZS/BnaC07G0506200ZS/BnaA03G0528500ZS/BnaC07G0364000ZS/BnaC07G0257800ZS/BnaA09G0212800ZS/BnaA06G0417600ZS/BnaA02G0306700ZS/BnaC06G0246700ZS/BnaC02G0323100ZS/BnaA07G0228800ZS/BnaC05G0459900ZS/BnaC04G0427300ZS/BnaA04G0136900ZS/BnaC04G0301500ZS/BnaC01G0276800ZS/BnaC03G0201000ZS/BnaA04G0231200ZS/BnaC03G0…	30	down	6h VS 30m	3
BP	GO:0009695	jasmonic acid biosynthetic process	17/1684	109/62797	5.63444272352935e-09	2.18921576653797e-07	1.64955724471748e-07	BnaC09G0267600ZS/BnaA09G0228100ZS/BnaC09G0267300ZS/BnaC08G0473100ZS/BnaC08G0240500ZS/BnaA08G0261700ZS/BnaC08G0260600ZS/BnaA08G0247200ZS/BnaC03G0482200ZS/BnaA03G0389500ZS/BnaC02G0379200ZS/BnaA02G0279100ZS/BnaC02G0267900ZS/BnaA02G0200800ZS/BnaA07G0318400ZS/BnaA03G0170700ZS/BnaA02G0167200ZS	17	down	6h VS 30m	3
BP	GO:0042545	cell wall modification	34/1684	427/62797	2.49094564597974e-08	7.87392140635968e-07	5.9329392281587e-07	Bnascaffold0027G0005100ZS/BnaC07G0495600ZS/BnaC03G0773700ZS/BnaC01G0083800ZS/BnaA08G0155600ZS/BnaA01G0070700ZS/BnaC09G0618700ZS/BnaA10G0298000ZS/BnaC08G0203000ZS/BnaA08G0288100ZS/BnaC07G0549400ZS/BnaC01G0001000ZS/BnaA06G0452100ZS/BnaA01G0001800ZS/BnaA01G0000700ZS/BnaC07G0541500ZS/BnaC03G0681300ZS/BnaC01G0010200ZS/BnaA08G0192100ZS/BnaA03G0567100ZS/BnaA01G0008700ZS/BnaC05G0486200ZS/BnaC03G0388700ZS…	34	down	6h VS 30m	3
BP	GO:1900424	regulation of defense response to bacterium	21/1684	187/62797	3.96165728825943e-08	1.21122800698424e-06	9.12650988753466e-07	BnaC09G0101500ZS/BnaC07G0216700ZS/BnaA09G0101500ZS/BnaA07G0150600ZS/BnaC08G0352000ZS/BnaC07G0313700ZS/BnaC06G0281900ZS/BnaA07G0253900ZS/BnaC04G0392100ZS/BnaA04G0109300ZS/BnaA02G0351200ZS/BnaC04G0284000ZS/BnaC04G0283900ZS/BnaA04G0020300ZS/BnaC03G0552300ZS/BnaA06G0278900ZS/BnaC03G0519700ZS/BnaA06G0305100ZS/BnaA09G0064300ZS/BnaA04G0064400ZS/BnaA03G0060800ZS	21	down	6h VS 30m	3
BP	GO:0009850	auxin metabolic process	20/1684	219/62797	2.27302030796831e-06	5.16973521263525e-05	3.89535572674929e-05	BnaC09G0590700ZS/BnaC03G0025600ZS/BnaA10G0273300ZS/BnaA03G0021000ZS/BnaC08G0227300ZS/BnaA08G0272900ZS/BnaC07G0541500ZS/BnaC03G0681300ZS/BnaC01G0010200ZS/BnaA08G0192100ZS/BnaA03G0567100ZS/BnaA01G0008700ZS/BnaC06G0010000ZS/BnaA10G0066700ZS/BnaC05G0229800ZS/BnaC02G0105400ZS/BnaA08G0310400ZS/BnaA06G0349000ZS/BnaA06G0091400ZS/BnaA05G0446500ZS	20	down	6h VS 30m	3
BP	GO:0071369	cellular response to ethylene stimulus	24/1684	348/62797	2.94147752099398e-05	0.00040636	0.000306189	BnaC07G0508000ZS/BnaC07G0257800ZS/BnaA09G0212800ZS/BnaA06G0417600ZS/BnaA02G0306700ZS/BnaC07G0102200ZS/BnaA07G0067900ZS/BnaC05G0459900ZS/BnaC04G0601900ZS/BnaC04G0054300ZS/BnaA09G0720700ZS/BnaA05G0048700ZS/BnaA04G0283700ZS/BnaC02G0277100ZS/BnaA02G0206900ZS/BnaC01G0362500ZS/BnaC01G0104800ZS/BnaA01G0086200ZS/BnaA10G0241700ZS/BnaA09G0677500ZS/BnaA08G0075500ZS/BnaA07G0259300ZS/BnaA04G0064400ZS/BnaA01G0…	24	down	6h VS 30m	3
BP	GO:0009693	ethylene biosynthetic process	10/1684	125/62797	0.00205085	0.0144333	0.0108754	BnaC07G0469400ZS/BnaC05G0105300ZS/BnaA06G0085100ZS/BnaC05G0033200ZS/BnaC02G0277100ZS/BnaA02G0206900ZS/BnaC01G0510700ZS/BnaA01G0404600ZS/BnaA10G0005000ZS/BnaA09G0250600ZS	10	down	6h VS 30m	3
BP	GO:0043455	regulation of secondary metabolic process	20/1078	263/62797	4.04578097225774e-08	3.14154892495814e-06	2.28267221171595e-06	BnaC08G0483300ZS/BnaC05G0130700ZS/BnaA09G0625900ZS/BnaA06G0105600ZS/BnaC06G0457200ZS/BnaA07G0390300ZS/BnaC03G0554000ZS/BnaC03G0519300ZS/BnaC02G0550200ZS/BnaA06G0305600ZS/BnaC03G0035500ZS/BnaA03G0028700ZS/BnaC01G0213000ZS/BnaA01G0165700ZS/BnaA10G0029300ZS/BnaA08G0313100ZS/BnaA02G0214900ZS/BnaA06G0377400ZS/BnaA05G0042800ZS/BnaA03G0215800ZS	20	up	6h VS 30m	3
BP	GO:0009734	auxin-activated signaling pathway	21/1078	322/62797	2.51973566527652e-07	1.22285921505451e-05	8.88538366176457e-06	Bnascaffold0025G0041000ZS/BnaC06G0372400ZS/BnaC02G0250300ZS/BnaC07G0538600ZS/BnaC07G0537000ZS/BnaA03G0561500ZS/BnaC06G0376800ZS/BnaC06G0297700ZS/BnaC02G0255200ZS/BnaA07G0322100ZS/BnaC04G0601800ZS/BnaA04G0283600ZS/BnaC02G0456100ZS/BnaC02G0145300ZS/BnaA02G0118100ZS/BnaC01G0507400ZS/BnaA01G0407900ZS/BnaC01G0368600ZS/BnaA01G0299000ZS/BnaA07G0119000ZS/BnaA06G0168200ZS	21	up	6h VS 30m	3
BP	GO:0006739	NADP metabolic process	13/1078	130/62797	4.30730322955965e-07	1.85812275430726e-05	1.35012545675086e-05	BnaC07G0153000ZS/BnaC03G0636900ZS/BnaA08G0221800ZS/BnaA07G0101100ZS/BnaC06G0179900ZS/BnaC04G0340800ZS/BnaA07G0182100ZS/BnaA04G0068100ZS/BnaC04G0415800ZS/BnaC04G0274300ZS/BnaA07G0376400ZS/BnaA03G0051800ZS/BnaA01G0218700ZS	13	up	6h VS 30m	3
BP	GO:0042545	cell wall modification	22/1078	427/62797	6.46179633056364e-06	0.0001568	0.000113932	Bnascaffold0027G0038900ZS/BnaC02G0439300ZS/BnaC09G0405600ZS/BnaA02G0119300ZS/BnaC09G0069900ZS/BnaC08G0306900ZS/BnaC07G0523700ZS/BnaA03G0547200ZS/BnaC07G0035800ZS/BnaC06G0360400ZS/BnaC02G0239200ZS/BnaC02G0238700ZS/BnaA07G0310300ZS/BnaC05G0511700ZS/BnaA05G0453600ZS/BnaC04G0071500ZS/BnaC03G0227000ZS/BnaA03G0193400ZS/BnaC02G0153100ZS/BnaC01G0225200ZS/BnaA03G0503400ZS/BnaA01G0175700ZS	22	up	6h VS 30m	3
BP	GO:0006865	amino acid transport	15/1078	273/62797	9.02007630122585e-05	0.00140353	0.00101982	BnaC08G0522600ZS/BnaA09G0659600ZS/BnaC07G0505800ZS/BnaC01G0070900ZS/BnaA03G0527900ZS/BnaA01G0059100ZS/BnaC04G0568000ZS/BnaC04G0072900ZS/BnaA05G0065700ZS/BnaC02G0481600ZS/BnaA02G0358000ZS/BnaC02G0201400ZS/BnaC02G0142800ZS/BnaA09G0038700ZS/BnaA05G0062600ZS	15	up	6h VS 30m	3
BP	GO:0009851	auxin biosynthetic process	9/1078	121/62797	0.000254862	0.00286812	0.002084	Bnascaffold0025G0041000ZS/BnaC06G0372400ZS/BnaC02G0250300ZS/BnaC09G0052800ZS/BnaC07G0355900ZS/BnaA09G0063600ZS/BnaA06G0338300ZS/BnaC02G0078200ZS/BnaA01G0083200ZS	9	up	6h VS 30m	3
BP	GO:2000280	regulation of root development	14/1078	300/62797	0.000785023	0.00708803	0.00515021	BnaC07G0522000ZS/BnaC06G0376800ZS/BnaC06G0297700ZS/BnaC02G0255200ZS/BnaA07G0322100ZS/BnaC05G0346200ZS/BnaC05G0114500ZS/BnaC04G0615900ZS/BnaA04G0298800ZS/BnaC03G0378500ZS/BnaA03G0315600ZS/BnaA10G0300300ZS/BnaA08G0186200ZS/BnaA08G0135000ZS	14	up	6h VS 30m	3
BP	GO:0006006	glucose metabolic process	9/1078	155/62797	0.00151637	0.0125932	0.0091503	BnaC07G0153000ZS/BnaC03G0636900ZS/BnaA08G0221800ZS/BnaA07G0101100ZS/BnaC06G0179900ZS/BnaC04G0340800ZS/BnaA07G0182100ZS/BnaA04G0068100ZS/BnaA03G0051800ZS	9	up	6h VS 30m	3
BP	GO:0009956	radial pattern formation	7/1078	107/62797	0.00254513	0.0181311	0.0131742	BnaC09G0442300ZS/BnaA10G0159600ZS/BnaA10G0159500ZS/BnaC02G0145300ZS/BnaA02G0118100ZS/BnaC02G0005500ZS/BnaA02G0007900ZS	7	up	6h VS 30m	3
BP	GO:0006754	ATP biosynthetic process	12/1078	296/62797	0.0055831	0.0347881	0.0252773	BnaC09G0398100ZS/BnaC08G0343700ZS/BnaC06G0179900ZS/BnaC04G0340800ZS/BnaA07G0182100ZS/BnaA04G0068100ZS/BnaC06G0022700ZS/BnaA10G0056100ZS/BnaC01G0200700ZS/BnaA01G0157600ZS/BnaC01G0058900ZS/BnaA01G0050200ZS	12	up	6h VS 30m	3
BP	GO:0009404	toxin metabolic process	43/1684	259/62797	1.41342782032882e-21	5.27208576982648e-19	3.97247608450309e-19	Bnascaffold0418G0000200ZS/Bnascaffold0349G0000200ZS/BnaC03G0606500ZS/BnaA06G0184800ZS/Bnascaffold0025G0009100ZS/BnaC07G0498000ZS/BnaC01G0080800ZS/BnaA03G0519500ZS/BnaA01G0068200ZS/BnaC08G0475000ZS/BnaC05G0145000ZS/BnaA06G0117600ZS/BnaC08G0474600ZS/BnaA09G0619300ZS/BnaC08G0002800ZS/BnaC07G0541500ZS/BnaC03G0681300ZS/BnaC01G0010200ZS/BnaA08G0192100ZS/BnaA03G0567100ZS/BnaA01G0008700ZS/BnaC06G0365000Z…	43	down	6h VS 30m	3
BP	GO:0009863	salicylic acid mediated signaling pathway	27/1684	203/62797	9.78891183804203e-12	8.00362258233884e-10	6.0306680668392e-10	BnaC09G0446700ZS/BnaC08G0484800ZS/BnaC08G0311700ZS/BnaA09G0475000ZS/BnaC08G0271200ZS/BnaA08G0240400ZS/BnaC07G0205300ZS/BnaC07G0143600ZS/BnaC05G0247500ZS/BnaA09G0422300ZS/BnaC07G0009500ZS/BnaA07G0003500ZS/BnaC05G0483600ZS/BnaC03G0390000ZS/BnaA05G0430400ZS/BnaA03G0325200ZS/BnaC05G0409000ZS/BnaC04G0346200ZS/BnaA04G0064000ZS/BnaC03G0519700ZS/BnaA06G0305100ZS/BnaC03G0024200ZS/BnaA03G0019200ZS/BnaA05G0…	27	down	6h VS 30m	3
BP	GO:1900037	regulation of cellular response to hypoxia	5/1078	16/62797	5.5123681572099e-06	0.000135884	9.87344806103428e-05	BnaC03G0374800ZS/BnaA05G0496400ZS/BnaA05G0438100ZS/BnaA03G0312700ZS/BnaA07G0366800ZS	5	up	6h VS 30m	3
BP	GO:0042436	indole-containing compound catabolic process	11/1684	51/62797	8.8774421146884e-08	2.5471430067529e-06	1.91925266770996e-06	BnaC08G0106300ZS/BnaC07G0541500ZS/BnaC03G0681300ZS/BnaC01G0010200ZS/BnaA08G0192100ZS/BnaA03G0567100ZS/BnaA01G0008700ZS/BnaC05G0214400ZS/BnaA09G0446200ZS/BnaA07G0113500ZS/BnaA07G0111900ZS	11	down	6h VS 30m	3
