# Supplementary material for: Integrated transcriptome and translatome analyses reveal the early regulatory network of Brassica napus roots in response to the growth-promoting rhizobacterium Pseudomonas simiae WCS417
Source: Research Square preprint supplement (doi:10.21203/rs.3.rs-7990582/v1), 2025-11-13
Supplement: Supplementary file 2 [file 6e13a99d7350915f0969b98d.xlsx]

## Sheet: Data
Table S1. Overview of the sequencing data used in the article.
Sample	Class	Treatment	Replicate	Reads (M)
M_WCS417_30m_1	RNA-seq	30 min	1	34.28
M_WCS417_30m_2	RNA-seq	30 min	2	35.18
M_WCS417_6h_1	RNA-seq	6 hour	1	41.95
M_WCS417_6h_2	RNA-seq	6 hour	2	39.76
M_Control_1	RNA-seq	control	1	34.92
M_Control_2	RNA-seq	control	2	38.18
N_WCS417_30m_1	RNC-seq	30 min	1	37
N_WCS417_30m_2	RNC-seq	30 min	2	37.39
N_WCS417_6h_1	RNC-seq	6 hour	1	39.84
N_WCS417_6h_2	RNC-seq	6 hour	2	42.66
N_Control_1	RNC-seq	control	1	34.29
N_Control_2	RNC-seq	control	2	37.24
