# Supplementary material for: Integrated transcriptome and translatome analyses reveal the early regulatory network of Brassica napus roots in response to the growth-promoting rhizobacterium Pseudomonas simiae WCS417
Source: Research Square preprint supplement (doi:10.21203/rs.3.rs-7990582/v1), 2025-11-13
Supplement: Supplementary file 3 [file 9d44f4b6f47760fdf2d99582.xlsx]

## Sheet: Sheet1
Table S8: Primers used for qRT-PCR in this paper.
Primer	Sequence (5’- 3’)
JOX4-F	TCGGACCGGTTAAAGAACTAC
JOX4-R	CCACTAGGACCCTTTTGCCT
ERF13-F	TGCGGAGGAAGTGAAACCAA
ERF13-R	TCCCCTGTACTGCATTCCCT
EXPA15-F	GATACGATGCTGGGTGGGTC
EXPA15-R	CGTGTTGGTCCCGTATCCTT
GDU6-F	GACGACACCGGAGACAACAA
GDU6-R	GGTGGAGGAATCACCGGAAC
YUC6-F	TCTATGCAACTTCGGTGCTC
YUC6-R	CCATTTGAGTAACAACATGGACAAT
PXMT1-F	AGCACTGTTAGAAGCGGCAA
PXMT1-R	CGCACAACCAAAATCTGCCA
CLE1-F	CGAGGGCGTATGATGAGAGA
CLE1-R	GACCTCCAGGGCTAAGTCTC
DDF1-F	GATGTTCAGGCCAACGGAAT
DDF1-R	ACTCCTCTCCTCCGATCCC
ERF53-F	GTGAGTGATGACACAGGTTG
ERF53-R	GATCTTCCTTCTGGTTATAAG
CBF1-F	CTTAGCTCTCCGTGGAAGAG
CBF1-R	CAGCAGCAGCCTTCTGGAT
CBF2-F	TCCGGTTAATACGGAAGGTGG
CBF2-R	CCTCAGACGAACTCCTCTGTAAA
NRT2-F	GGAGCCGTGTGTGATCTTCT
NRT2-R	AATGAACCCTCCGGCATCAG
PHT3-F	GCAGCTCAACCACAAGACAAG
PHT3-R	CTTGGGTTCAGGGACAAGGA
CBF4-F	CAGAACGAGACGGCTACG
CBF4-R	CGTTCTCTTCCGTGGTCTC
DOT4-F	GGCTGTGCTGATGATTCTTGT
DOT4-R	CACAGCCTTAGCAGAGTCAAG
PME5-F	AAGCTTACTTTTCCGGCTGC
PME5-R	GCGGCCGTTACCGAAAATAAA
ERF13-F	TAAACGACAACTGGAGCGACT
ERF13-R	CGTAGCCACCGGAGATGAGA
Actin7-F	GAAGGCTGGTTTTGCTGGTG
Actin7-R	ACCCATCCCAACCATGACAC
