# Supplementary material for: Integrated transcriptome and translatome analyses reveal the early regulatory network of Brassica napus roots in response to the growth-promoting rhizobacterium Pseudomonas simiae WCS417
Source: Research Square preprint supplement (doi:10.21203/rs.3.rs-7990582/v1), 2025-11-13
Supplement: Supplementary file 4 [file 9f6b1b971f0b1d77cb3ab709.xlsx]

## Sheet: M_WCS417_30m-M_Control
Table S. Results of differential expression gene analysis of RNA-seq.
geneid	sampleA	sampleB	baseMeanA	baseMeanB	baseMean	log2FoldChange	lfcSE	stat	pvalue	padj	change	group	Class	Ath	Symbol	Description
BnaA01G0027600ZS	M_WCS417_30m	M_Control	130.937	5.8635	68.4	4.48447	0.518955	8.64133	5.55615e-18	4.39925e-16	Up	M_WCS417_30m-M_Control	RNA	AT4G35770	SEN1	Senescence-associated gene that is strongly induced by phosphate starvation. Transcripts are differentially regulated at the level of mRNA stability at different times of day. mRNAs are targets of the mRNA degradation pathway mediated by the downstream (DST) instability determinant.
BnaA02G0122400ZS	M_WCS417_30m	M_Control	551.521	16.6132	284.067	5.0564	0.302335	16.7245	8.69206e-63	8.00839e-60	Up	M_WCS417_30m-M_Control	RNA	AT5G56550	OXS3	Encodes OXIDATIVE STRESS 3 (OXS3)&#65292; involved in tolerance to heavy metals and oxidative stress.
BnaA04G0219900ZS	M_WCS417_30m	M_Control	107.012	5.81154	56.412	4.1964	0.538877	7.7873	6.84559e-15	4.14449e-13	Up	M_WCS417_30m-M_Control	RNA	AT2G34180	WL2	Encodes CBL-interacting protein kinase 13 (CIPK13).
BnaA04G0246000ZS	M_WCS417_30m	M_Control	26.4413	1.9545	14.1979	3.76071	0.966358	3.89163	9.95729e-05	0.00135566	Up	M_WCS417_30m-M_Control	RNA	AT2G38240	JOX4	2-oxoglutarate (2OG) and Fe(II)-dependent oxygenase superfamily protein
BnaA06G0081500ZS	M_WCS417_30m	M_Control	104.749	392.548	248.648	-1.90574	0.209133	-9.11255	8.04645e-20	7.3867e-18	Down	M_WCS417_30m-M_Control	RNA	AT1G12610	DDF1	Encodes a member of the DREB subfamily A-1 of ERF/AP2 transcription factor family (DDF1). The protein contains one AP2 domain. There are six members in this subfamily, including CBF1, CBF2, and CBF3. Overexpression of this gene results in delayed flowering and dwarfism, reduction of gibberellic acid biosynthesis, and increased tolerance to high levels of salt. This gene is expressed in all tissue…
BnaA06G0393700ZS	M_WCS417_30m	M_Control	73.8209	5.04213	39.4315	3.90667	0.620171	6.29934	2.98912e-10	1.10805e-08	Up	M_WCS417_30m-M_Control	RNA	AT3G25770	AOC2	Encodes allene oxide cyclase. One of four genes in Arabidopsis that encode this enzyme, which catalyzes an essential step in jasmonic acid biosynthesis. Gene expression is induced during senescence, a process that involves jasmonic acid signalling pathway. Note: Nomenclature for Arabidopsis allene oxide cyclase 2 (AOC2, AT3G25770) gene is based on Stenzel et al. 2003 Plant Molecular Biology 51:89…
BnaA06G0431800ZS	M_WCS417_30m	M_Control	512.193	219.928	366.06	1.22017	0.173889	7.01696	2.26752e-12	1.05514e-10	Up	M_WCS417_30m-M_Control	RNA	AT5G45110	NPR3	Encodes NPR3, a paralog of NPR1. Involved in negative regulation of defense responses against bacterial and oomycete pathogens. npr3 mutants has elevated level of PR1 expression. Interacts with TGA2, TGA3, TGA5 and TGA6 in yeast two hybrid assays. NPR3 and NPR4 are receptors for the immune signal salicylic acid.
BnaA08G0172600ZS	M_WCS417_30m	M_Control	0.500262	25.4085	12.9544	-5.64439	1.58986	-3.55025	0.000384869	0.0044365	Down	M_WCS417_30m-M_Control	RNA	AT4G25470	FTQ4	Encodes a member of the DREB subfamily A-1 of ERF/AP2 transcription factor family (CBF2). The protein contains one AP2 domain. There are six members in this subfamily, including CBF1, CBF2, and CBF3. This gene is involved in response to low temperature, abscisic acid, and circadian rhythm. Overexpressing this gene leads to increased freeze tolerance and induces the expression level of 85 cold-ind…
BnaA10G0089800ZS	M_WCS417_30m	M_Control	43.0925	577.087	310.09	-3.74097	0.232143	-16.1149	2.00429e-58	1.5159e-55	Down	M_WCS417_30m-M_Control	RNA	AT5G51990	DREB1D	encodes a member of the DREB subfamily A-1 of ERF/AP2 transcription factor family (CBF4). The protein contains one AP2 domain. There are six members in this subfamily, including CBF1, CBF2, and CBF3. This gene is involved in response to drought stress and abscisic acid treatment, but not to low temperature.
BnaC01G0111600ZS	M_WCS417_30m	M_Control	79.2288	21.6554	50.4421	1.87794	0.41812	4.49138	7.07627e-06	0.000128111	Up	M_WCS417_30m-M_Control	RNA	AT4G18170	WRKY28	member of WRKY Transcription Factor; Group II-c. Involved in the activation of salicylic acid biosynthesis genes ICS1 and PBS3.
BnaC02G0206000ZS	M_WCS417_30m	M_Control	638.267	149.722	393.994	2.09218	0.178202	11.7405	7.90178e-32	1.57025e-29	Up	M_WCS417_30m-M_Control	RNA	AT1G66700	PXMT1	A member of the Arabidopsis SABATH methyltransferase gene family. Encodes PXMT1, a methyltransferase that methylates 1,7-paraxanthine.
BnaC02G0273400ZS	M_WCS417_30m	M_Control	20.8592	2.93175	11.8955	2.83298	0.914176	3.09894	0.00194213	0.0174279	Up	M_WCS417_30m-M_Control	RNA	AT1G73165	CLE1	Member of a large family of putative ligands homologous to the Clavata3 gene. Consists of a single exon. Can replace CLV3 function in vivo.
BnaC04G0098300ZS	M_WCS417_30m	M_Control	30.5226	3.34244	16.9325	3.17154	0.810816	3.91155	9.17074e-05	0.00126385	Up	M_WCS417_30m-M_Control	RNA	AT2G36690	GIM2	2-oxoglutarate (2OG) and Fe(II)-dependent oxygenase superfamily protein
BnaC08G0165900ZS	M_WCS417_30m	M_Control	3.58103	58.682	31.1315	-4.04312	0.706491	-5.72281	1.04776e-08	3.11403e-07	Down	M_WCS417_30m-M_Control	RNA	AT4G25490	DREB1B	Transcriptional activator that binds to the DRE/CRT regulatory element and induces COR (cold-regulated) gene expression increasing plant freezing tolerance. It encodes a member of the DREB subfamily A-1 of ERF/AP2 transcription factor family (CBF1). The protein contains one AP2 domain. There are six members in this subfamily, including CBF1, CBF2, and CBF3. This gene is involved in response to lo…
BnaC08G0456900ZS	M_WCS417_30m	M_Control	44.5616	4.01292	24.2872	3.50183	0.731504	4.78716	1.69155e-06	3.47739e-05	Up	M_WCS417_30m-M_Control	RNA	AT2G20880	ERF53	Encodes ERF53, a drought-induced transcription factor. Belongs to the AP2/ERF superfamily, and has a highly conserved AP2 domain. Regulates drought-responsive gene expressions by binding to the GCC box and/or dehydration-responsive element (DRE) in the promoter of downstream genes. Overexpression of AtERF53 driven by the CaMV35S promoter resulted in an unstable drought-tolerant phenotype in T2 tr…
BnaC09G0077800ZS	M_WCS417_30m	M_Control	24.8771	0.514604	12.6959	5.66923	1.58031	3.58742	0.000333962	0.00392277	Up	M_WCS417_30m-M_Control	RNA	AT5G63450	CYP94B1	member of CYP94B
BnaA01G0059100ZS	M_WCS417_30m	M_Control	55.3997	87.9055	71.6526	-0.663824	0.340186	-1.95136	0.0510144	0.215569	Normal	M_WCS417_30m-M_Control	RNA	AT4G31730	GDU1	Glutamine dumper1 is a putative transmembrane protein. It is involved in glutamine secretion
BnaA01G0086300ZS	M_WCS417_30m	M_Control	2972.56	4051.54	3512.05	-0.446855	0.105415	-4.239	2.24513e-05	0.000361403	Normal	M_WCS417_30m-M_Control	RNA	AT4G17500	ERF1A	Encodes a member of the ERF (ethylene response factor) subfamily B-3 of ERF/AP2 transcription factor family (ATERF-1). The protein contains one AP2 domain. There are 18 members in this subfamily including ATERF-1, ATERF-2, AND ATERF-5.
BnaA01G0091600ZS	M_WCS417_30m	M_Control	116.945	41.3043	79.1247	1.50634	0.335031	4.49611	6.9209e-06	0.000125793	Up	M_WCS417_30m-M_Control	RNA	AT4G18170	WRKY28	member of WRKY Transcription Factor; Group II-c. Involved in the activation of salicylic acid biosynthesis genes ICS1 and PBS3.
BnaA02G0403400ZS	M_WCS417_30m	M_Control	93.0051	63.1575	78.0813	0.556964	0.317708	1.75307	0.0795903	0.288456	Normal	M_WCS417_30m-M_Control	RNA	AT5G63450	CYP94B1	member of CYP94B
BnaA03G0115600ZS	M_WCS417_30m	M_Control	130.031	5.81154	67.9213	4.47683	0.518402	8.63583	5.83008e-18	4.60895e-16	Up	M_WCS417_30m-M_Control	RNA	AT5G56550	OXS3	Encodes OXIDATIVE STRESS 3 (OXS3)&#65292; involved in tolerance to heavy metals and oxidative stress.
BnaA04G0120500ZS	M_WCS417_30m	M_Control	1691.16	1189.6	1440.38	0.507693	0.117346	4.32645	1.51533e-05	0.000254093	Normal	M_WCS417_30m-M_Control	RNA	AT5G40780	LHT1	Encodes LHT1 (lysine histidine transporter), a high-affinity transporter for cellular amino acid uptake in both root epidermis and leaf mesophyll.
BnaA05G0103100ZS	M_WCS417_30m	M_Control	136.43	7.25143	71.8408	4.22471	0.485038	8.71006	3.03707e-18	2.46241e-16	Up	M_WCS417_30m-M_Control	RNA	AT2G34180	WL2	Encodes CBL-interacting protein kinase 13 (CIPK13).
BnaA08G0172700ZS	M_WCS417_30m	M_Control	1.00052	35.0251	18.0128	-5.11048	1.17574	-4.34661	1.38255e-05	0.000234391	Down	M_WCS417_30m-M_Control	RNA	AT4G25470	FTQ4	Encodes a member of the DREB subfamily A-1 of ERF/AP2 transcription factor family (CBF2). The protein contains one AP2 domain. There are six members in this subfamily, including CBF1, CBF2, and CBF3. This gene is involved in response to low temperature, abscisic acid, and circadian rhythm. Overexpressing this gene leads to increased freeze tolerance and induces the expression level of 85 cold-ind…
BnaA08G0213800ZS	M_WCS417_30m	M_Control	60.8709	236.541	148.706	-1.95705	0.257383	-7.60362	2.87955e-14	1.61772e-12	Down	M_WCS417_30m-M_Control	RNA	AT1G28360	ERF12	encodes a member of the ERF (ethylene response factor) subfamily B-1 of ERF/AP2 transcription factor family (ERF12). The protein contains one AP2 domain. There are 15 members in this subfamily including ATERF-3, ATERF-4, ATERF-7, and leafy petiole.
BnaA08G0261700ZS	M_WCS417_30m	M_Control	104.344	75.9087	90.1261	0.455447	0.311343	1.46285	0.14351	0.412701	Normal	M_WCS417_30m-M_Control	RNA	AT1G17420	LOX3	LOX3 encode a Lipoxygenase. Lipoxygenases (LOXs) catalyze the oxygenation of fatty acids (FAs).
BnaA08G0278200ZS	M_WCS417_30m	M_Control	47.9116	97.3613	72.6364	-1.02479	0.345342	-2.96747	0.00300261	0.0250213	Down	M_WCS417_30m-M_Control	RNA	AT1G12610	DDF1	Encodes a member of the DREB subfamily A-1 of ERF/AP2 transcription factor family (DDF1). The protein contains one AP2 domain. There are six members in this subfamily, including CBF1, CBF2, and CBF3. Overexpression of this gene results in delayed flowering and dwarfism, reduction of gibberellic acid biosynthesis, and increased tolerance to high levels of salt. This gene is expressed in all tissue…
BnaA09G0038700ZS	M_WCS417_30m	M_Control	37.1527	27.4669	32.3098	0.438042	0.485097	0.903	0.366526	0.678354	Normal	M_WCS417_30m-M_Control	RNA	AT5G40780	LHT1	Encodes LHT1 (lysine histidine transporter), a high-affinity transporter for cellular amino acid uptake in both root epidermis and leaf mesophyll.
BnaA09G0084000ZS	M_WCS417_30m	M_Control	16.7462	7.61016	12.1782	1.12541	0.810354	1.38879	0.164896	0.4478	Normal	M_WCS417_30m-M_Control	RNA	AT5G63450	CYP94B1	member of CYP94B
BnaC01G0070900ZS	M_WCS417_30m	M_Control	117.604	252.177	184.891	-1.10117	0.230169	-4.78416	1.71704e-06	3.52407e-05	Down	M_WCS417_30m-M_Control	RNA	AT4G31730	GDU1	Glutamine dumper1 is a putative transmembrane protein. It is involved in glutamine secretion
BnaC02G0205900ZS	M_WCS417_30m	M_Control	572.266	102.445	337.356	2.4769	0.20463	12.1043	1.00214e-33	2.23711e-31	Up	M_WCS417_30m-M_Control	RNA	AT1G66700	PXMT1	A member of the Arabidopsis SABATH methyltransferase gene family. Encodes PXMT1, a methyltransferase that methylates 1,7-paraxanthine.
BnaC02G0206100ZS	M_WCS417_30m	M_Control	803.766	195.596	499.681	2.03804	0.167668	12.1552	5.3822e-34	1.22304e-31	Up	M_WCS417_30m-M_Control	RNA	AT1G66700	PXMT1	A member of the Arabidopsis SABATH methyltransferase gene family. Encodes PXMT1, a methyltransferase that methylates 1,7-paraxanthine.
BnaC02G0206200ZS	M_WCS417_30m	M_Control	101.636	69.6915	85.6639	0.544377	0.30339	1.79431	0.0727635	0.272683	Normal	M_WCS417_30m-M_Control	RNA	AT1G66700	PXMT1	A member of the Arabidopsis SABATH methyltransferase gene family. Encodes PXMT1, a methyltransferase that methylates 1,7-paraxanthine.
BnaC02G0238700ZS	M_WCS417_30m	M_Control	30.0381	19.0823	24.5602	0.655809	0.553289	1.18529	0.235902	0.543912	Normal	M_WCS417_30m-M_Control	RNA	AT1G69530	EXPA1	Member of Alpha-Expansin Gene Family. Naming convention from the Expansin Working Group (Kende et al, Plant Mol Bio). Involved in the formation of nematode-induced syncytia in roots of Arabidopsis thaliana.
BnaC02G0250300ZS	M_WCS417_30m	M_Control	32.7137	26.074	29.3938	0.322017	0.54712	0.588567	0.556152	0.812057	Normal	M_WCS417_30m-M_Control	RNA	AT1G70560	WEI8	TAA1 is involved in the shade-induced production of indole-3-pyruvate (IPA), a precursor to IAA, a biologically active auxin. It is also involved in regulating many aspects of plant growth and development from embryogenesis to flower formation and plays a role in ethylene-mediated signaling. This enzyme can catalyze the formation of IPA from L-tryptophan. Though L-Trp is expected to be the prefer…
BnaC02G0267900ZS	M_WCS417_30m	M_Control	389.862	1231.13	810.496	-1.6593	0.137644	-12.055	1.82486e-33	3.93502e-31	Down	M_WCS417_30m-M_Control	RNA	AT1G72520	LOX4	PLAT/LH2 domain-containing lipoxygenase family protein
BnaC02G0439300ZS	M_WCS417_30m	M_Control	22.2333	25.8711	24.0522	-0.215798	0.577357	-0.373768	0.708577	0.891687	Normal	M_WCS417_30m-M_Control	RNA	AT2G03090	EXPA15	member of Alpha-Expansin Gene Family. Naming convention from the Expansin Working Group (Kende et al, 2004. Plant Mol Bio). Involved in the formation of nematode-induced syncytia in roots of Arabidopsis thaliana.
BnaC02G0481600ZS	M_WCS417_30m	M_Control	68.033	93.9199	80.9764	-0.463591	0.314289	-1.47505	0.1402	0.40739	Normal	M_WCS417_30m-M_Control	RNA	AT3G30725	GDU6	Encodes a member of the GDU (glutamine dumper) family proteins involved in amino acid export: At4g31730 (GDU1), At4g25760 (GDU2), At5g57685 (GDU3), At2g24762 (GDU4), At5g24920 (GDU5), At3g30725 (GDU6) and At5g38770 (GDU7).
BnaC02G0536400ZS	M_WCS417_30m	M_Control	260.452	120.197	190.324	1.11522	0.219958	5.07014	3.97529e-07	9.1582e-06	Up	M_WCS417_30m-M_Control	RNA	AT5G63450	CYP94B1	member of CYP94B
BnaC03G0134000ZS	M_WCS417_30m	M_Control	240.584	35.3838	137.984	2.76106	0.286216	9.64679	5.07195e-22	5.52722e-20	Up	M_WCS417_30m-M_Control	RNA	AT5G56550	OXS3	Encodes OXIDATIVE STRESS 3 (OXS3)&#65292; involved in tolerance to heavy metals and oxidative stress.
BnaC03G0543200ZS	M_WCS417_30m	M_Control	101.247	8.48848	54.8677	3.59966	0.499516	7.20628	5.74995e-13	2.8566e-11	Up	M_WCS417_30m-M_Control	RNA	AT5G63450	CYP94B1	member of CYP94B
BnaC04G0601900ZS	M_WCS417_30m	M_Control	141.711	375.244	258.478	-1.4053	0.197906	-7.10081	1.24032e-12	5.93501e-11	Down	M_WCS417_30m-M_Control	RNA	AT2G44840	ERF13	encodes a member of the ERF (ethylene response factor) subfamily B-3 of ERF/AP2 transcription factor family. The protein contains one AP2 domain. There are 18 members in this subfamily including ATERF-1, ATERF-2, AND ATERF-5.
BnaC05G0219000ZS	M_WCS417_30m	M_Control	227.444	72.982	150.213	1.63927	0.248551	6.59531	4.24362e-11	1.72029e-09	Up	M_WCS417_30m-M_Control	RNA	AT1G26770	EXPA10	Encodes an expansin. Naming convention from the Expansin Working Group (Kende et al, Plant Mol Bio). Involved in the formation of nematode-induced syncytia in roots of Arabidopsis thaliana.
BnaC06G0386800ZS	M_WCS417_30m	M_Control	49.8493	205.633	127.741	-2.04464	0.276186	-7.40311	1.33031e-13	7.06627e-12	Down	M_WCS417_30m-M_Control	RNA	AT1G19610	PDF1.4	Predicted to encode a PR (pathogenesis-related) protein. Belongs to the plant defensin (PDF) family with the following members: At1g75830/PDF1.1, At5g44420/PDF1.2a, At2g26020/PDF1.2b, At5g44430/PDF1.2c, At2g26010/PDF1.3, At1g19610/PDF1.4, At1g55010/PDF1.5, At2g02120/PDF2.1, At2g02100/PDF2.2, At2g02130/PDF2.3, At1g61070/PDF2.4, At5g63660/PDF2.5, At2g02140/PDF2.6, At5g38330/PDF3.1 and At4g30070/PDF…
BnaC07G0236000ZS	M_WCS417_30m	M_Control	368.376	203.627	286.001	0.856092	0.185804	4.6075	4.0754e-06	7.7667e-05	Normal	M_WCS417_30m-M_Control	RNA	AT5G45110	NPR3	Encodes NPR3, a paralog of NPR1. Involved in negative regulation of defense responses against bacterial and oomycete pathogens. npr3 mutants has elevated level of PR1 expression. Interacts with TGA2, TGA3, TGA5 and TGA6 in yeast two hybrid assays. NPR3 and NPR4 are receptors for the immune signal salicylic acid.
BnaC07G0355900ZS	M_WCS417_30m	M_Control	20.2956	13.063	16.6793	0.632762	0.66446	0.952295	0.340947	0.654761	Normal	M_WCS417_30m-M_Control	RNA	AT5G25620	YUC6	Flavin-binding monooxygenase family protein
BnaC08G0218200ZS	M_WCS417_30m	M_Control	134.128	212.838	173.483	-0.66497	0.228336	-2.91225	0.00358838	0.0290429	Normal	M_WCS417_30m-M_Control	RNA	AT1G12610	DDF1	Encodes a member of the DREB subfamily A-1 of ERF/AP2 transcription factor family (DDF1). The protein contains one AP2 domain. There are six members in this subfamily, including CBF1, CBF2, and CBF3. Overexpression of this gene results in delayed flowering and dwarfism, reduction of gibberellic acid biosynthesis, and increased tolerance to high levels of salt. This gene is expressed in all tissue…
BnaC08G0240500ZS	M_WCS417_30m	M_Control	154.218	89.8031	122.01	0.781306	0.266389	2.93295	0.00335762	0.0274471	Normal	M_WCS417_30m-M_Control	RNA	AT1G17420	LOX3	LOX3 encode a Lipoxygenase. Lipoxygenases (LOXs) catalyze the oxygenation of fatty acids (FAs).
BnaC08G0344700ZS	M_WCS417_30m	M_Control	387.589	68.1527	227.871	2.51104	0.244107	10.2866	8.09672e-25	1.09412e-22	Up	M_WCS417_30m-M_Control	RNA	AT3G54420	EP3	encodes an EP3 chitinase that is expressed during somatic embryogenesis in 'nursing' cells surrounding the embryos but not in embryos themselves. The gene is also expressed in mature pollen and growing pollen tubes until they enter the receptive synergid, but not in endosperm and integuments as in carrot. Post-embryonically, expression is found in hydathodes, stipules, root epidermis and emerging…
BnaC08G0345100ZS	M_WCS417_30m	M_Control	1377.99	330.357	854.175	2.06083	0.150385	13.7037	9.65386e-43	3.26133e-40	Up	M_WCS417_30m-M_Control	RNA	AT3G54420	EP3	encodes an EP3 chitinase that is expressed during somatic embryogenesis in 'nursing' cells surrounding the embryos but not in embryos themselves. The gene is also expressed in mature pollen and growing pollen tubes until they enter the receptive synergid, but not in endosperm and integuments as in carrot. Post-embryonically, expression is found in hydathodes, stipules, root epidermis and emerging…
BnaC08G0473100ZS	M_WCS417_30m	M_Control	42.1553	78.5857	60.3705	-0.89977	0.362976	-2.47887	0.01318	0.0809261	Normal	M_WCS417_30m-M_Control	RNA	AT1G17420	LOX3	LOX3 encode a Lipoxygenase. Lipoxygenases (LOXs) catalyze the oxygenation of fatty acids (FAs).
BnaC09G0208800ZS	M_WCS417_30m	M_Control	87.955	51.0149	69.4849	0.780329	0.35451	2.20115	0.0277256	0.140496	Normal	M_WCS417_30m-M_Control	RNA	AT5G43360	PHT3	Encodes Pht1;3, a member of the Pht1 family of phosphate transporters which include: Pht1;1/At5g43350, Pht1;2/At5g43370, Pht1;3/At5g43360, Pht1;4/At2g38940, Pht1;5/At2g32830, Pht1;6/At5g43340, Pht1;7/At3g54700, Pht1;8/At1g20860, Pht1;9/At1g76430 (Plant Journal 2002, 31:341).
BnaC09G0267300ZS	M_WCS417_30m	M_Control	257.124	38.2636	147.694	2.74372	0.274852	9.98255	1.81743e-23	2.20326e-21	Up	M_WCS417_30m-M_Control	RNA	AT3G25770	AOC2	Encodes allene oxide cyclase. One of four genes in Arabidopsis that encode this enzyme, which catalyzes an essential step in jasmonic acid biosynthesis. Gene expression is induced during senescence, a process that involves jasmonic acid signalling pathway. Note: Nomenclature for Arabidopsis allene oxide cyclase 2 (AOC2, AT3G25770) gene is based on Stenzel et al. 2003 Plant Molecular Biology 51:89…
BnaC09G0341300ZS	M_WCS417_30m	M_Control	41.5917	218.951	130.271	-2.39484	0.28197	-8.49323	2.00972e-17	1.52456e-15	Down	M_WCS417_30m-M_Control	RNA	AT5G51990	DREB1D	encodes a member of the DREB subfamily A-1 of ERF/AP2 transcription factor family (CBF4). The protein contains one AP2 domain. There are six members in this subfamily, including CBF1, CBF2, and CBF3. This gene is involved in response to drought stress and abscisic acid treatment, but not to low temperature.
Bnascaffold0027G0038900ZS	M_WCS417_30m	M_Control	25.8618	25.4085	25.6352	0.0274288	0.536442	0.0511311	0.959221	0.987176	Normal	M_WCS417_30m-M_Control	RNA	AT2G03090	EXPA15	member of Alpha-Expansin Gene Family. Naming convention from the Expansin Working Group (Kende et al, 2004. Plant Mol Bio). Involved in the formation of nematode-induced syncytia in roots of Arabidopsis thaliana.
BnaA01G0348500ZS	M_WCS417_30m	M_Control	2081.99	116.901	1099.44	4.15108	0.155185	26.7492	1.26273e-157	6.39874e-153	Up	M_WCS417_30m-M_Control	RNA	AT3G15450	--	Aluminium induced protein with YGL and LRDR motifs
BnaA07G0349100ZS	M_WCS417_30m	M_Control	38.0107	1385.97	711.988	-5.18558	0.214443	-24.1816	3.47193e-129	8.79682e-125	Down	M_WCS417_30m-M_Control	RNA	AT1G74930	ORA47	encodes a member of the DREB subfamily A-5 of ERF/AP2 transcription factor family. The protein contains one AP2 domain. There are 15 members in this subfamily including RAP2.1, RAP2.9 and RAP2.10.
BnaA09G0610100ZS	M_WCS417_30m	M_Control	77.2119	1417.2	747.203	-4.19778	0.175386	-23.9345	1.34129e-126	2.26562e-122	Down	M_WCS417_30m-M_Control	RNA	AT1G19210	ERF17	encodes a member of the DREB subfamily A-5 of ERF/AP2 transcription factor family. The protein contains one AP2 domain. There are 15 members in this subfamily including RAP2.1, RAP2.9 and RAP2.10.
BnaC03G0167800ZS	M_WCS417_30m	M_Control	397.873	3058.58	1728.23	-2.9431	0.129815	-22.6715	8.56714e-114	1.08533e-109	Down	M_WCS417_30m-M_Control	RNA	AT2G30020	AP2C1	Encodes AP2C1. Belongs to the clade B of the PP2C-superfamily. Acts as a MAPK phosphatase that negatively regulates MPK4 and MPK6.
BnaA08G0166200ZS	M_WCS417_30m	M_Control	363.206	2697.69	1530.45	-2.89327	0.131797	-21.9525	8.19395e-107	8.3044e-103	Down	M_WCS417_30m-M_Control	RNA	AT4G27657	--	--
BnaC08G0232400ZS	M_WCS417_30m	M_Control	2686.38	431.986	1559.18	2.63687	0.121725	21.6624	4.64133e-104	3.91991e-100	Up	M_WCS417_30m-M_Control	RNA	AT1G15210	PDR7	pleiotropic drug resistance 7
BnaC01G0213100ZS	M_WCS417_30m	M_Control	2251.52	9894.82	6073.17	-2.13574	0.100705	-21.2079	8.06846e-100	5.84087e-96	Down	M_WCS417_30m-M_Control	RNA	AT4G27280	CMI1	Calcium-binding EF-hand family protein
BnaC05G0153400ZS	M_WCS417_30m	M_Control	291.038	1961.62	1126.33	-2.75276	0.133403	-20.6349	1.33331e-94	8.44552e-91	Down	M_WCS417_30m-M_Control	RNA	AT1G18300	NUDT4	nudix hydrolase homolog 4
BnaA05G0399100ZS	M_WCS417_30m	M_Control	8632.35	2025.61	5328.98	2.0916	0.102594	20.3871	2.17768e-92	1.22613e-88	Up	M_WCS417_30m-M_Control	RNA	AT3G15450	--	Aluminium induced protein with YGL and LRDR motifs
BnaA03G0144500ZS	M_WCS417_30m	M_Control	489.371	2661.1	1575.23	-2.44305	0.120908	-20.2059	8.68315e-91	4.4001e-87	Down	M_WCS417_30m-M_Control	RNA	AT2G30020	AP2C1	Encodes AP2C1. Belongs to the clade B of the PP2C-superfamily. Acts as a MAPK phosphatase that negatively regulates MPK4 and MPK6.
BnaA03G0512700ZS	M_WCS417_30m	M_Control	542.849	2868.18	1705.51	-2.40172	0.119508	-20.0967	7.89352e-90	3.63633e-86	Down	M_WCS417_30m-M_Control	RNA	AT4G29780	--	--
BnaC05G0398400ZS	M_WCS417_30m	M_Control	396.119	2375.78	1385.95	-2.58493	0.130616	-19.7903	3.61103e-87	1.52488e-83	Down	M_WCS417_30m-M_Control	RNA	AT3G19595	--	Haloacid dehalogenase-like hydrolase (HAD) superfamily protein
BnaC08G0464100ZS	M_WCS417_30m	M_Control	159.807	1379.62	769.715	-3.11101	0.15773	-19.7236	1.3527e-86	5.27281e-83	Down	M_WCS417_30m-M_Control	RNA	AT1G19210	ERF17	encodes a member of the DREB subfamily A-5 of ERF/AP2 transcription factor family. The protein contains one AP2 domain. There are 15 members in this subfamily including RAP2.1, RAP2.9 and RAP2.10.
BnaA08G0269200ZS	M_WCS417_30m	M_Control	3036.54	607.688	1822.11	2.32154	0.119232	19.4707	1.94576e-84	7.04282e-81	Up	M_WCS417_30m-M_Control	RNA	AT1G15210	PDR7	pleiotropic drug resistance 7
BnaC06G0072700ZS	M_WCS417_30m	M_Control	1966.5	319.904	1143.2	2.61888	0.134665	19.4473	3.0693e-84	1.03689e-80	Up	M_WCS417_30m-M_Control	RNA	AT3G15450	--	Aluminium induced protein with YGL and LRDR motifs
BnaC05G0447600ZS	M_WCS417_30m	M_Control	8886.47	2301.77	5594.12	1.94888	0.1008	19.3341	2.77656e-83	8.79373e-80	Up	M_WCS417_30m-M_Control	RNA	AT3G15450	--	Aluminium induced protein with YGL and LRDR motifs
BnaC06G0181900ZS	M_WCS417_30m	M_Control	2376.42	464.74	1420.58	2.35382	0.12285	19.1602	7.96328e-82	2.37371e-78	Up	M_WCS417_30m-M_Control	RNA	AT3G53260	PAL2	Encodes phenylalanine lyase. Arabidopsis has four PALs: AT2G37040 (PAL1), AT3G53260 (PAL2), AT5G04230 (PAL3) and AT3G10340 (PAL4).
BnaC09G0449600ZS	M_WCS417_30m	M_Control	524.276	2780.44	1652.36	-2.40738	0.125779	-19.1398	1.17691e-81	3.31327e-78	Down	M_WCS417_30m-M_Control	RNA	AT5G22250	CAF1b	Encodes one of the homologs of the yeast CCR4-associated factor 1: AT3G44260 (CAF1a), AT5G22250 (CAF1b). Has mRNA deadenylation activity. Also plays a role in plant defense responses.
BnaA06G0121800ZS	M_WCS417_30m	M_Control	805.115	4277.62	2541.37	-2.40991	0.126426	-19.0619	5.2387e-81	1.39719e-77	Down	M_WCS417_30m-M_Control	RNA	AT1G17750	PEPR2	Encodes PEPR2, a plasma membrane leucine-rich repeat receptor kinase functioning as a receptor for the Pep1 and Pep2 peptides. Pep1 and Pep2 are amino acids that induce the transcription of defense-related genes.
BnaA01G0075800ZS	M_WCS417_30m	M_Control	1219.23	5085.64	3152.44	-2.06033	0.108323	-19.0203	1.15809e-80	2.93426e-77	Down	M_WCS417_30m-M_Control	RNA	AT4G29780	--	--
BnaC06G0453400ZS	M_WCS417_30m	M_Control	1762.98	289.303	1026.14	2.60632	0.137099	19.0105	1.39552e-80	3.36746e-77	Up	M_WCS417_30m-M_Control	RNA	AT1G80820	CCR2	Encodes an cinnamoyl CoA reductase isoform. Involved in lignin biosynthesis.
BnaC07G0148900ZS	M_WCS417_30m	M_Control	536.418	2606.84	1571.63	-2.28074	0.12011	-18.9888	2.10911e-80	4.85804e-77	Down	M_WCS417_30m-M_Control	RNA	AT1G27730	ZAT10	Related to Cys2/His2-type zinc-finger proteins found in higher plants. Compensated for a subset of calcineurin deficiency in yeast. Salt tolerance produced by ZAT10 appeared to be partially dependent on ENA1/PMR2, a P-type ATPase required for Li+ and Na+ efflux in yeast. The protein is localized to the nucleus, acts as a transcriptional repressor and is responsive to chitin oligomers. Also involv…
BnaA05G0136300ZS	M_WCS417_30m	M_Control	689.363	3209.68	1949.52	-2.21924	0.117005	-18.967	3.19412e-80	7.03734e-77	Down	M_WCS417_30m-M_Control	RNA	AT2G30020	AP2C1	Encodes AP2C1. Belongs to the clade B of the PP2C-superfamily. Acts as a MAPK phosphatase that negatively regulates MPK4 and MPK6.
BnaA04G0192500ZS	M_WCS417_30m	M_Control	288.505	1735.74	1012.12	-2.58854	0.137014	-18.8925	1.31425e-79	2.77492e-76	Down	M_WCS417_30m-M_Control	RNA	AT2G30020	AP2C1	Encodes AP2C1. Belongs to the clade B of the PP2C-superfamily. Acts as a MAPK phosphatase that negatively regulates MPK4 and MPK6.
BnaA01G0165800ZS	M_WCS417_30m	M_Control	1436.04	5578.53	3507.28	-1.95773	0.105193	-18.6109	2.62333e-77	5.31738e-74	Down	M_WCS417_30m-M_Control	RNA	AT4G27270	--	Quinone reductase family protein
BnaC04G0589600ZS	M_WCS417_30m	M_Control	1061.74	4280.2	2670.97	-2.01127	0.108819	-18.4828	2.84087e-76	5.53686e-73	Down	M_WCS417_30m-M_Control	RNA	AT2G42760	--	--
BnaC01G0218300ZS	M_WCS417_30m	M_Control	79.2922	917.351	498.321	-3.53191	0.193875	-18.2175	3.75054e-74	7.03907e-71	Down	M_WCS417_30m-M_Control	RNA	AT4G27657	--	--
BnaC04G0553100ZS	M_WCS417_30m	M_Control	7935.49	2181.6	5058.55	1.86284	0.102276	18.2139	4.0044e-74	7.24711e-71	Up	M_WCS417_30m-M_Control	RNA	AT2G37040	PAL1	Encodes PAL1, a phenylalanine ammonia-lyase. Arabidopsis has four PALs: AT2G37040 (PAL1), AT3G53260 (PAL2), AT5G04230 (PAL3) and AT3G10340 (PAL4).
BnaC02G0109300ZS	M_WCS417_30m	M_Control	1449.72	5496.77	3473.25	-1.92279	0.105657	-18.1984	5.31216e-74	9.02024e-71	Down	M_WCS417_30m-M_Control	RNA	AT5G22250	CAF1b	Encodes one of the homologs of the yeast CCR4-associated factor 1: AT3G44260 (CAF1a), AT5G22250 (CAF1b). Has mRNA deadenylation activity. Also plays a role in plant defense responses.
BnaA04G0272000ZS	M_WCS417_30m	M_Control	541.683	2611.8	1576.74	-2.26943	0.124707	-18.1981	5.34016e-74	9.02024e-71	Down	M_WCS417_30m-M_Control	RNA	AT2G42760	--	--
BnaA07G0385600ZS	M_WCS417_30m	M_Control	1630.4	227.969	929.183	2.8421	0.156328	18.1803	7.3911e-74	1.20818e-70	Up	M_WCS417_30m-M_Control	RNA	AT1G80820	CCR2	Encodes an cinnamoyl CoA reductase isoform. Involved in lignin biosynthesis.
BnaA03G0334600ZS	M_WCS417_30m	M_Control	2411.08	501.866	1456.48	2.26332	0.124534	18.1743	8.24839e-74	1.30618e-70	Up	M_WCS417_30m-M_Control	RNA	AT3G13650	--	Disease resistance-responsive (dirigent-like protein) family protein
BnaA10G0165800ZS	M_WCS417_30m	M_Control	392.791	2144.31	1268.55	-2.44931	0.135086	-18.1315	1.79767e-73	2.76046e-70	Down	M_WCS417_30m-M_Control	RNA	AT5G22250	CAF1b	Encodes one of the homologs of the yeast CCR4-associated factor 1: AT3G44260 (CAF1a), AT5G22250 (CAF1b). Has mRNA deadenylation activity. Also plays a role in plant defense responses.
BnaA09G0461900ZS	M_WCS417_30m	M_Control	4944.48	1285.78	3115.13	1.94337	0.107216	18.1257	1.99722e-73	2.97668e-70	Up	M_WCS417_30m-M_Control	RNA	AT1G22410	--	Class-II DAHP synthetase family protein
BnaA06G0015600ZS	M_WCS417_30m	M_Control	802.182	67.3213	434.752	3.56996	0.197996	18.0305	1.12254e-72	1.62525e-69	Up	M_WCS417_30m-M_Control	RNA	AT3G15450	--	Aluminium induced protein with YGL and LRDR motifs
BnaA01G0170000ZS	M_WCS417_30m	M_Control	125.997	997.7	561.849	-2.98509	0.166021	-17.9802	2.78635e-72	3.92209e-69	Down	M_WCS417_30m-M_Control	RNA	AT4G27657	--	--
BnaC01G0089700ZS	M_WCS417_30m	M_Control	1506.09	5497.66	3501.88	-1.86802	0.104784	-17.8273	4.33992e-71	5.94382e-68	Down	M_WCS417_30m-M_Control	RNA	AT4G29780	--	--
BnaC04G0337700ZS	M_WCS417_30m	M_Control	4124.1	1048.26	2586.18	1.97629	0.110896	17.8212	4.83685e-71	6.45007e-68	Up	M_WCS417_30m-M_Control	RNA	AT3G53260	PAL2	Encodes phenylalanine lyase. Arabidopsis has four PALs: AT2G37040 (PAL1), AT3G53260 (PAL2), AT5G04230 (PAL3) and AT3G10340 (PAL4).
BnaA04G0070500ZS	M_WCS417_30m	M_Control	2205.05	422.541	1313.8	2.38538	0.134186	17.7767	1.07149e-70	1.39223e-67	Up	M_WCS417_30m-M_Control	RNA	AT3G53260	PAL2	Encodes phenylalanine lyase. Arabidopsis has four PALs: AT2G37040 (PAL1), AT3G53260 (PAL2), AT5G04230 (PAL3) and AT3G10340 (PAL4).
BnaC04G0149000ZS	M_WCS417_30m	M_Control	2404.78	525.703	1465.24	2.19414	0.123596	17.7525	1.64879e-70	2.08877e-67	Up	M_WCS417_30m-M_Control	RNA	AT2G32150	XMPP	Haloacid dehalogenase-like hydrolase (HAD) superfamily protein
BnaC04G0179500ZS	M_WCS417_30m	M_Control	536.37	2346.01	1441.19	-2.12878	0.121334	-17.5448	6.52363e-69	8.06289e-66	Down	M_WCS417_30m-M_Control	RNA	AT2G30020	AP2C1	Encodes AP2C1. Belongs to the clade B of the PP2C-superfamily. Acts as a MAPK phosphatase that negatively regulates MPK4 and MPK6.
BnaC04G0334700ZS	M_WCS417_30m	M_Control	3941.54	1024.5	2483.02	1.94399	0.110889	17.531	8.30933e-69	1.00254e-65	Up	M_WCS417_30m-M_Control	RNA	AT3G53260	PAL2	Encodes phenylalanine lyase. Arabidopsis has four PALs: AT2G37040 (PAL1), AT3G53260 (PAL2), AT5G04230 (PAL3) and AT3G10340 (PAL4).
BnaA03G0101100ZS	M_WCS417_30m	M_Control	1880.34	397.055	1138.7	2.24304	0.128344	17.4768	2.15251e-68	2.53665e-65	Up	M_WCS417_30m-M_Control	RNA	AT5G59780	MYB59	Encodes a putative transcription factor (MYB59).
BnaA04G0237600ZS	M_WCS417_30m	M_Control	7880.76	2158.05	5019.41	1.86828	0.107594	17.3642	1.53926e-67	1.77273e-64	Up	M_WCS417_30m-M_Control	RNA	AT2G37040	PAL1	Encodes PAL1, a phenylalanine ammonia-lyase. Arabidopsis has four PALs: AT2G37040 (PAL1), AT3G53260 (PAL2), AT5G04230 (PAL3) and AT3G10340 (PAL4).
BnaA07G0094900ZS	M_WCS417_30m	M_Control	949.72	3614.51	2282.11	-1.92832	0.111301	-17.3252	3.03488e-67	3.41754e-64	Down	M_WCS417_30m-M_Control	RNA	AT1G28370	ERF11	encodes a member of the ERF (ethylene response factor) subfamily B-1 of ERF/AP2 transcription factor family. The protein contains one AP2 domain. There are 15 members in this subfamily including ATERF-3, ATERF-4, ATERF-7, and leafy petiole.
BnaA05G0363900ZS	M_WCS417_30m	M_Control	649.386	2704.37	1676.88	-2.058	0.119593	-17.2084	2.29882e-66	2.5324e-63	Down	M_WCS417_30m-M_Control	RNA	AT3G19595	--	Haloacid dehalogenase-like hydrolase (HAD) superfamily protein
BnaA09G0494800ZS	M_WCS417_30m	M_Control	5076.84	1437.38	3257.11	1.82032	0.105911	17.1873	3.30654e-66	3.56501e-63	Up	M_WCS417_30m-M_Control	RNA	AT3G53260	PAL2	Encodes phenylalanine lyase. Arabidopsis has four PALs: AT2G37040 (PAL1), AT3G53260 (PAL2), AT5G04230 (PAL3) and AT3G10340 (PAL4).
BnaC01G0104800ZS	M_WCS417_30m	M_Control	276.276	1441.51	858.892	-2.38318	0.139189	-17.1219	1.01878e-65	1.07553e-62	Down	M_WCS417_30m-M_Control	RNA	AT4G17490	ERF6	Encodes a member of the ERF (ethylene response factor) subfamily B-3 of ERF/AP2 transcription factor family (ATERF-6). The protein contains one AP2 domain. There are 18 members in this subfamily including ATERF-1, ATERF-2, AND ATERF-5. It is involved in the response to reactive oxygen species and light stress.
BnaA10G0168100ZS	M_WCS417_30m	M_Control	2969.84	718.239	1844.04	2.04711	0.119578	17.1195	1.06161e-65	1.09788e-62	Up	M_WCS417_30m-M_Control	RNA	AT5G21940	--	--
BnaC02G0066900ZS	M_WCS417_30m	M_Control	1317.93	224.649	771.288	2.55037	0.149256	17.0872	1.8489e-65	1.87382e-62	Up	M_WCS417_30m-M_Control	RNA	AT5G15130	WRKY72	member of WRKY Transcription Factor; Group II-b; contribute to basal immunity.
BnaC03G0401600ZS	M_WCS417_30m	M_Control	2156.53	504.397	1330.46	2.0958	0.122925	17.0495	3.52772e-65	3.50517e-62	Up	M_WCS417_30m-M_Control	RNA	AT3G13650	--	Disease resistance-responsive (dirigent-like protein) family protein
BnaC06G0113600ZS	M_WCS417_30m	M_Control	3997.11	1055.83	2526.47	1.92	0.113364	16.9366	2.41746e-64	2.35581e-61	Up	M_WCS417_30m-M_Control	RNA	AT1G51680	AT4CL1	encodes an isoform of 4-coumarate:CoA ligase (4CL), which is involved in the last step of the general phenylpropanoid pathway. In addition to 4-coumarate, it also converts ferulate. The catalytic efficiency was in the following (descending) order: p-coumaric acid, ferulic acid, caffeic acid and 5-OH-ferulic acid. At4CL1 was unable to use sinapic acid as substrate.
BnaA06G0378000ZS	M_WCS417_30m	M_Control	481.971	2100.85	1291.41	-2.12369	0.125417	-16.933	2.5701e-64	2.4573e-61	Down	M_WCS417_30m-M_Control	RNA	AT3G28340	GolS8	Encodes a protein with putative galacturonosyltransferase activity.
BnaA07G0249300ZS	M_WCS417_30m	M_Control	32.3652	617.144	324.755	-4.24841	0.25221	-16.8447	1.14659e-63	1.07597e-60	Down	M_WCS417_30m-M_Control	RNA	AT1G74930	ORA47	encodes a member of the DREB subfamily A-5 of ERF/AP2 transcription factor family. The protein contains one AP2 domain. There are 15 members in this subfamily including RAP2.1, RAP2.9 and RAP2.10.
BnaA02G0057600ZS	M_WCS417_30m	M_Control	1970.9	463.721	1217.31	2.08779	0.12513	16.685	1.6864e-62	1.52601e-59	Up	M_WCS417_30m-M_Control	RNA	AT5G15130	WRKY72	member of WRKY Transcription Factor; Group II-b; contribute to basal immunity.
BnaC02G0151900ZS	M_WCS417_30m	M_Control	635.736	55.3915	345.564	3.51839	0.211447	16.6396	3.59934e-62	3.19988e-59	Up	M_WCS417_30m-M_Control	RNA	AT5G56550	OXS3	Encodes OXIDATIVE STRESS 3 (OXS3)&#65292; involved in tolerance to heavy metals and oxidative stress.
BnaA05G0171400ZS	M_WCS417_30m	M_Control	5402.8	1585.86	3494.33	1.76822	0.106294	16.6353	3.86906e-62	3.38036e-59	Up	M_WCS417_30m-M_Control	RNA	AT1G51680	AT4CL1	encodes an isoform of 4-coumarate:CoA ligase (4CL), which is involved in the last step of the general phenylpropanoid pathway. In addition to 4-coumarate, it also converts ferulate. The catalytic efficiency was in the following (descending) order: p-coumaric acid, ferulic acid, caffeic acid and 5-OH-ferulic acid. At4CL1 was unable to use sinapic acid as substrate.
BnaC04G0094900ZS	M_WCS417_30m	M_Control	3043.58	779.076	1911.33	1.9667	0.118704	16.5681	1.18424e-61	1.01712e-58	Up	M_WCS417_30m-M_Control	RNA	AT2G37040	PAL1	Encodes PAL1, a phenylalanine ammonia-lyase. Arabidopsis has four PALs: AT2G37040 (PAL1), AT3G53260 (PAL2), AT5G04230 (PAL3) and AT3G10340 (PAL4).
BnaC08G0272200ZS	M_WCS417_30m	M_Control	2330.85	586.533	1458.69	1.99023	0.120383	16.5324	2.14301e-61	1.80992e-58	Up	M_WCS417_30m-M_Control	RNA	AT1G22410	--	Class-II DAHP synthetase family protein
BnaA06G0181200ZS	M_WCS417_30m	M_Control	281.954	1407.59	844.77	-2.31988	0.140453	-16.5171	2.76164e-61	2.29416e-58	Down	M_WCS417_30m-M_Control	RNA	AT3G46620	RDUF1	Encodes an ABA- and drought-induced RING-DUF1117 gene whose mutation results in hyposensitive phenotypes toward ABA in terms of germination rate and stomatal closure and markedly reduced tolerance to drought stress relative to wild-type plants.
BnaA10G0152800ZS	M_WCS417_30m	M_Control	883.387	134.341	508.864	2.71651	0.166634	16.3023	9.50473e-60	7.76843e-57	Up	M_WCS417_30m-M_Control	RNA	AT5G59780	MYB59	Encodes a putative transcription factor (MYB59).
BnaC09G0211400ZS	M_WCS417_30m	M_Control	828.519	3019.29	1923.91	-1.86547	0.114733	-16.2592	1.92136e-59	1.54545e-56	Down	M_WCS417_30m-M_Control	RNA	AT5G42380	CML37	calmodulin like 37
BnaA03G0101200ZS	M_WCS417_30m	M_Control	1249.3	242.655	745.979	2.36323	0.145653	16.2251	3.35355e-59	2.65528e-56	Up	M_WCS417_30m-M_Control	RNA	AT5G59780	MYB59	Encodes a putative transcription factor (MYB59).
BnaA06G0452000ZS	M_WCS417_30m	M_Control	1050.45	177.642	614.046	2.56177	0.157987	16.2151	3.94614e-59	3.07641e-56	Up	M_WCS417_30m-M_Control	RNA	AT4G38420	sks9	SKU5 similar 9
BnaA03G0499500ZS	M_WCS417_30m	M_Control	205.147	1127.89	666.517	-2.45838	0.15207	-16.1661	8.7473e-59	6.71607e-56	Down	M_WCS417_30m-M_Control	RNA	AT4G27657	--	--
BnaC08G0251900ZS	M_WCS417_30m	M_Control	18.3421	515.609	266.976	-4.81643	0.299323	-16.0911	2.94617e-58	2.1955e-55	Down	M_WCS417_30m-M_Control	RNA	AT1G19210	ERF17	encodes a member of the DREB subfamily A-5 of ERF/AP2 transcription factor family. The protein contains one AP2 domain. There are 15 members in this subfamily including RAP2.1, RAP2.9 and RAP2.10.
BnaC07G0271300ZS	M_WCS417_30m	M_Control	212.151	1180.19	696.172	-2.47569	0.154713	-16.0018	1.24037e-57	9.10938e-55	Down	M_WCS417_30m-M_Control	RNA	AT2G01180	PAP1	Encodes phosphatidate phosphatase. Up-regulated by genotoxic stress (gamma ray or UV-B) and elicitor treatments with mastoparan and harpin. Expressed in roots and leaves.
BnaC07G0549400ZS	M_WCS417_30m	M_Control	2820.03	792.161	1806.09	1.83164	0.114839	15.9497	2.86333e-57	2.07281e-54	Up	M_WCS417_30m-M_Control	RNA	AT3G45970	EXPL1	member of EXPANSIN-LIKE. Naming convention from the Expansin Working Group (Kende et al, 2004. Plant Mol Bio)
BnaA03G0238000ZS	M_WCS417_30m	M_Control	878.106	135.365	506.736	2.69488	0.169528	15.8964	6.71247e-57	4.79081e-54	Up	M_WCS417_30m-M_Control	RNA	AT2G24850	TAT3	Encodes a tyrosine aminotransferase that is responsive to treatment with jasmonic acid.
BnaC09G0491300ZS	M_WCS417_30m	M_Control	1229.16	4046.08	2637.62	-1.71884	0.108302	-15.8708	1.00879e-56	7.09991e-54	Down	M_WCS417_30m-M_Control	RNA	AT5G17350	--	--
BnaC06G0411400ZS	M_WCS417_30m	M_Control	25.7985	520.745	273.272	-4.33103	0.273413	-15.8406	1.63242e-56	1.13317e-53	Down	M_WCS417_30m-M_Control	RNA	AT1G74930	ORA47	encodes a member of the DREB subfamily A-5 of ERF/AP2 transcription factor family. The protein contains one AP2 domain. There are 15 members in this subfamily including RAP2.1, RAP2.9 and RAP2.10.
BnaC05G0568000ZS	M_WCS417_30m	M_Control	3783.92	1145.34	2464.63	1.72383	0.110223	15.6394	3.92275e-55	2.68624e-52	Up	M_WCS417_30m-M_Control	RNA	AT3G02360	PGD2	6-phosphogluconate dehydrogenase family protein
BnaC08G0248200ZS	M_WCS417_30m	M_Control	193.951	1053.26	623.607	-2.44044	0.156191	-15.6247	4.94314e-55	3.33985e-52	Down	M_WCS417_30m-M_Control	RNA	AT1G18740	B1L	Protein of unknown function (DUF793)
BnaC08G0173800ZS	M_WCS417_30m	M_Control	77.402	681.959	379.681	-3.14067	0.2014	-15.5942	7.97499e-55	5.31743e-52	Down	M_WCS417_30m-M_Control	RNA	AT4G27657	--	--
BnaC09G0026700ZS	M_WCS417_30m	M_Control	671.021	2444.31	1557.66	-1.8651	0.120041	-15.5371	1.94459e-54	1.27974e-51	Down	M_WCS417_30m-M_Control	RNA	AT3G28340	GolS8	Encodes a protein with putative galacturonosyltransferase activity.
BnaC04G0496900ZS	M_WCS417_30m	M_Control	776.049	2708.62	1742.34	-1.80336	0.116224	-15.5163	2.69309e-54	1.74961e-51	Down	M_WCS417_30m-M_Control	RNA	AT2G30020	AP2C1	Encodes AP2C1. Belongs to the clade B of the PP2C-superfamily. Acts as a MAPK phosphatase that negatively regulates MPK4 and MPK6.
BnaC03G0229200ZS	M_WCS417_30m	M_Control	2028.08	6247.99	4138.03	-1.62321	0.104886	-15.4759	5.04621e-54	3.23686e-51	Down	M_WCS417_30m-M_Control	RNA	AT2G40000	HSPRO2	ortholog of sugar beet HS1 PRO-1 2
BnaA03G0499300ZS	M_WCS417_30m	M_Control	536.393	2060.1	1298.25	-1.94152	0.125589	-15.4593	6.52937e-54	4.13587e-51	Down	M_WCS417_30m-M_Control	RNA	AT4G27657	--	--
BnaA04G0026900ZS	M_WCS417_30m	M_Control	384.885	1620.32	1002.6	-2.07333	0.134422	-15.4241	1.12769e-53	7.05489e-51	Down	M_WCS417_30m-M_Control	RNA	AT3G57930	--	--
BnaC05G0194900ZS	M_WCS417_30m	M_Control	6281.45	2048.44	4164.95	1.61643	0.104816	15.4217	1.17046e-53	7.23318e-51	Up	M_WCS417_30m-M_Control	RNA	AT1G22410	--	Class-II DAHP synthetase family protein
BnaA02G0239900ZS	M_WCS417_30m	M_Control	1986.2	531.656	1258.93	1.90118	0.123382	15.4089	1.42667e-53	8.71022e-51	Up	M_WCS417_30m-M_Control	RNA	AT1G80820	CCR2	Encodes an cinnamoyl CoA reductase isoform. Involved in lignin biosynthesis.
BnaC01G0046300ZS	M_WCS417_30m	M_Control	1165.42	3712.24	2438.83	-1.67147	0.109176	-15.3098	6.57314e-53	3.96532e-50	Down	M_WCS417_30m-M_Control	RNA	AT4G34140	--	D111/G-patch domain-containing protein
BnaA01G0263200ZS	M_WCS417_30m	M_Control	1192.51	260.557	726.535	2.19417	0.144021	15.235	2.071e-52	1.23466e-49	Up	M_WCS417_30m-M_Control	RNA	AT5G02500	HSP70-1	--
BnaA01G0086200ZS	M_WCS417_30m	M_Control	701.379	2442.55	1571.96	-1.79998	0.118274	-15.2187	2.65679e-52	1.56086e-49	Down	M_WCS417_30m-M_Control	RNA	AT4G17490	ERF6	Encodes a member of the ERF (ethylene response factor) subfamily B-3 of ERF/AP2 transcription factor family (ATERF-6). The protein contains one AP2 domain. There are 18 members in this subfamily including ATERF-1, ATERF-2, AND ATERF-5. It is involved in the response to reactive oxygen species and light stress.
BnaC07G0491700ZS	M_WCS417_30m	M_Control	594.525	2155.52	1375.02	-1.85815	0.122101	-15.2182	2.67977e-52	1.56086e-49	Down	M_WCS417_30m-M_Control	RNA	AT4G29780	--	--
BnaA10G0284600ZS	M_WCS417_30m	M_Control	1166.86	3684.38	2425.62	-1.65878	0.10913	-15.2001	3.53326e-52	2.0346e-49	Down	M_WCS417_30m-M_Control	RNA	AT5G04340	ZAT6	putative c2h2 zinc finger transcription factor mRNA,
Bnascaffold0025G0000500ZS	M_WCS417_30m	M_Control	591.881	2139.11	1365.5	-1.85376	0.122082	-15.1845	4.47878e-52	2.55008e-49	Down	M_WCS417_30m-M_Control	RNA	AT3G19580	ZF2	Encodes zinc finger protein. mRNA levels are upregulated in response to ABA, high salt, and mild dessication. The protein is localized to the nucleus and acts as a transcriptional repressor.
BnaC08G0333400ZS	M_WCS417_30m	M_Control	5204.68	1706.61	3455.65	1.60843	0.106241	15.1394	8.89903e-52	5.01055e-49	Up	M_WCS417_30m-M_Control	RNA	AT3G53260	PAL2	Encodes phenylalanine lyase. Arabidopsis has four PALs: AT2G37040 (PAL1), AT3G53260 (PAL2), AT5G04230 (PAL3) and AT3G10340 (PAL4).
BnaA08G0239500ZS	M_WCS417_30m	M_Control	1069.25	218.686	643.97	2.28838	0.151245	15.1302	1.02348e-51	5.69931e-49	Up	M_WCS417_30m-M_Control	RNA	AT1G22410	--	Class-II DAHP synthetase family protein
BnaA01G0319400ZS	M_WCS417_30m	M_Control	601.044	2155.1	1378.07	-1.84236	0.12186	-15.1187	1.21957e-51	6.71747e-49	Down	M_WCS417_30m-M_Control	RNA	AT3G19580	ZF2	Encodes zinc finger protein. mRNA levels are upregulated in response to ABA, high salt, and mild dessication. The protein is localized to the nucleus and acts as a transcriptional repressor.
BnaC07G0518100ZS	M_WCS417_30m	M_Control	1410.31	4451.87	2931.09	-1.65851	0.10972	-15.1158	1.2749e-51	6.94672e-49	Down	M_WCS417_30m-M_Control	RNA	AT4G34150	--	Calcium-dependent lipid-binding (CaLB domain) family protein
BnaC09G0251000ZS	M_WCS417_30m	M_Control	722.317	102.05	412.183	2.82794	0.187651	15.0702	2.54258e-51	1.37067e-48	Up	M_WCS417_30m-M_Control	RNA	AT2G01150	RHA2B	Encodes a RING-H2 finger protein that is expressed in vascular tissue, root tips, embryos and pistils.
BnaA08G0166400ZS	M_WCS417_30m	M_Control	1703.44	5137.82	3420.63	-1.5928	0.105763	-15.0601	2.96183e-51	1.57987e-48	Down	M_WCS417_30m-M_Control	RNA	AT4G27657	--	--
BnaC01G0087400ZS	M_WCS417_30m	M_Control	905.69	126.201	515.946	2.83703	0.189769	14.9499	1.55901e-50	8.22932e-48	Up	M_WCS417_30m-M_Control	RNA	AT4G29930	--	basic helix-loop-helix (bHLH) DNA-binding superfamily protein
BnaA10G0195600ZS	M_WCS417_30m	M_Control	423.538	1622.29	1022.92	-1.93729	0.130335	-14.864	5.64898e-50	2.9511e-47	Down	M_WCS417_30m-M_Control	RNA	AT3G03280	--	--
BnaC03G0611600ZS	M_WCS417_30m	M_Control	293.276	1269.54	781.41	-2.1144	0.142287	-14.8601	5.98406e-50	3.09425e-47	Down	M_WCS417_30m-M_Control	RNA	AT3G46620	RDUF1	Encodes an ABA- and drought-induced RING-DUF1117 gene whose mutation results in hyposensitive phenotypes toward ABA in terms of germination rate and stomatal closure and markedly reduced tolerance to drought stress relative to wild-type plants.
BnaA09G0417400ZS	M_WCS417_30m	M_Control	556.071	1987.52	1271.8	-1.83745	0.123823	-14.8394	8.15391e-50	4.17365e-47	Down	M_WCS417_30m-M_Control	RNA	AT1G29340	PUB17	Encodes a protein containing a UND, a U-box, and an ARM domain. This protein has E3 ubiquitin ligase activity. It is required for cell death and full resistance specified by Arabidopsis RPM1 and RPS4 resistance proteins against Pseudomonas syringae pv tomato.
Bnascaffold0027G0062100ZS	M_WCS417_30m	M_Control	505.379	1840.15	1172.76	-1.86436	0.125667	-14.8357	8.61044e-50	4.36325e-47	Down	M_WCS417_30m-M_Control	RNA	AT1G03220	SAP2	Eukaryotic aspartyl protease family protein
BnaA09G0700200ZS	M_WCS417_30m	M_Control	509.476	1846.89	1178.18	-1.85801	0.125391	-14.8177	1.12548e-49	5.64677e-47	Down	M_WCS417_30m-M_Control	RNA	AT1G03220	SAP2	Eukaryotic aspartyl protease family protein
Bnascaffold0027G0057000ZS	M_WCS417_30m	M_Control	516.059	1862.68	1189.37	-1.85175	0.125105	-14.8016	1.43103e-49	7.10943e-47	Down	M_WCS417_30m-M_Control	RNA	AT1G03220	SAP2	Eukaryotic aspartyl protease family protein
BnaC08G0244800ZS	M_WCS417_30m	M_Control	503.036	1818.2	1160.62	-1.85383	0.125392	-14.7843	1.84961e-49	9.09971e-47	Down	M_WCS417_30m-M_Control	RNA	AT1G18300	NUDT4	nudix hydrolase homolog 4
BnaA03G0542000ZS	M_WCS417_30m	M_Control	781.298	2566.87	1674.08	-1.71598	0.116141	-14.775	2.12409e-49	1.03496e-46	Down	M_WCS417_30m-M_Control	RNA	AT4G34150	--	Calcium-dependent lipid-binding (CaLB domain) family protein
BnaC03G0498600ZS	M_WCS417_30m	M_Control	9037.99	3273.46	6155.72	1.46525	0.0994669	14.731	4.07573e-49	1.96699e-46	Up	M_WCS417_30m-M_Control	RNA	AT5G02500	HSP70-1	encodes a member of heat shock protein 70 family.
BnaA07G0363200ZS	M_WCS417_30m	M_Control	568.124	2026.53	1297.33	-1.83463	0.125408	-14.6292	1.8281e-48	8.73937e-46	Down	M_WCS417_30m-M_Control	RNA	AT1G76650	CML38	calmodulin-like 38
BnaC06G0221400ZS	M_WCS417_30m	M_Control	126.013	737.601	431.807	-2.54925	0.174666	-14.595	3.02327e-48	1.43179e-45	Down	M_WCS417_30m-M_Control	RNA	AT3G59900	ARGOS	Encodes ARGOS (Auxin-Regulated Gene Involved in Organ Size). Inducible by auxin. Involved in lateral organ size control. Transgenic plants expressing sense or antisense ARGOS cDNA display enlarged or reduced aerial organs, respectively. The alteration in organ size is attributable mainly to changes in cell number and the duration of organ growth.
BnaA02G0200800ZS	M_WCS417_30m	M_Control	549.526	1948.7	1249.11	-1.82635	0.12525	-14.5816	3.67626e-48	1.72491e-45	Down	M_WCS417_30m-M_Control	RNA	AT1G72520	LOX4	PLAT/LH2 domain-containing lipoxygenase family protein
BnaA02G0090700ZS	M_WCS417_30m	M_Control	1296.25	3901.08	2598.66	-1.58956	0.109126	-14.5663	4.60458e-48	2.14067e-45	Down	M_WCS417_30m-M_Control	RNA	AT5G22250	CAF1b	Encodes one of the homologs of the yeast CCR4-associated factor 1: AT3G44260 (CAF1a), AT5G22250 (CAF1b). Has mRNA deadenylation activity. Also plays a role in plant defense responses.
BnaA07G0002100ZS	M_WCS417_30m	M_Control	7695.37	2797.18	5246.27	1.46005	0.100343	14.5506	5.78945e-48	2.66704e-45	Up	M_WCS417_30m-M_Control	RNA	AT5G48930	HCT	At5g48930 has been shown to encode for the hydroxycinnamoyl-Coenzyme A shikimate/quinate hydroxycinnamoyltransferase (HCT) both synthesizing and catabolizing the hydroxycinnamoylesters (coumaroyl/caffeoyl shikimate and quinate) involved in the phenylpropanoid pathway. Influence on the accumulation of flavonoids which in turn inhibit auxin transport and reduce plant growth.
BnaA05G0118400ZS	M_WCS417_30m	M_Control	1931.81	550.889	1241.35	1.8097	0.12455	14.5299	7.83519e-48	3.57694e-45	Up	M_WCS417_30m-M_Control	RNA	AT2G32150	XMPP	Haloacid dehalogenase-like hydrolase (HAD) superfamily protein
BnaC09G0452600ZS	M_WCS417_30m	M_Control	2667.05	836.345	1751.7	1.67297	0.115271	14.5134	9.96129e-48	4.50695e-45	Up	M_WCS417_30m-M_Control	RNA	AT5G21940	--	--
BnaA03G0021000ZS	M_WCS417_30m	M_Control	2850.26	901.571	1875.92	1.66072	0.114646	14.4856	1.49452e-47	6.70205e-45	Up	M_WCS417_30m-M_Control	RNA	AT5G05730	WEI2	ASA1 encodes the alpha subunit of anthranilate synthase, which catalyzes the rate-limiting step of tryptophan synthesis. ASA1 is induced by ethylene, and forms a link between ethylene signalling and auxin synthesis in roots.
BnaC08G0176700ZS	M_WCS417_30m	M_Control	1039.87	210.759	625.313	2.29999	0.159137	14.4529	2.40342e-47	1.06834e-44	Up	M_WCS417_30m-M_Control	RNA	AT4G28240	WIP1	Wound-responsive family protein
BnaC05G0287900ZS	M_WCS417_30m	M_Control	1033.75	3179.76	2106.75	-1.62092	0.112157	-14.4523	2.42517e-47	1.06864e-44	Down	M_WCS417_30m-M_Control	RNA	AT1G32920	--	--
BnaA04G0196800ZS	M_WCS417_30m	M_Control	2002.39	567.955	1285.17	1.81698	0.126446	14.3696	8.02844e-47	3.50718e-44	Up	M_WCS417_30m-M_Control	RNA	AT2G30490	REF3	Encodes a cinnamate-4-hydroxylase. Mutations in this gene impact phenylpropanoid metabolism, growth and development.
BnaC06G0247100ZS	M_WCS417_30m	M_Control	1869.24	526.327	1197.79	1.82936	0.127807	14.3134	1.80407e-46	7.81363e-44	Up	M_WCS417_30m-M_Control	RNA	AT1G80920	Toc12	A nuclear encoded soluble protein found in the chloroplast stroma. Negatively regulated by light and has rapid turnover in darkness.
BnaA08G0074900ZS	M_WCS417_30m	M_Control	687.555	2272.73	1480.14	-1.72464	0.120614	-14.2988	2.22533e-46	9.55645e-44	Down	M_WCS417_30m-M_Control	RNA	AT1G32920	--	--
BnaA03G0102100ZS	M_WCS417_30m	M_Control	391.958	1491.63	941.794	-1.92854	0.135013	-14.2841	2.74741e-46	1.16994e-43	Down	M_WCS417_30m-M_Control	RNA	AT5G59550	RDUF2	Encodes an ABA- and drought-induced RING-DUF1117 gene whose mutation results in hyposensitive phenotypes toward ABA in terms of germination rate and stomatal closure and markedly reduced tolerance to drought stress relative to wild-type plants.
BnaA09G0428500ZS	M_WCS417_30m	M_Control	3817.6	10694.2	7255.91	-1.48615	0.104048	-14.2833	2.77938e-46	1.17368e-43	Down	M_WCS417_30m-M_Control	RNA	AT1G27730	ZAT10	Related to Cys2/His2-type zinc-finger proteins found in higher plants. Compensated for a subset of calcineurin deficiency in yeast. Salt tolerance produced by ZAT10 appeared to be partially dependent on ENA1/PMR2, a P-type ATPase required for Li+ and Na+ efflux in yeast. The protein is localized to the nucleus, acts as a transcriptional repressor and is responsive to chitin oligomers. Also involv…
BnaA05G0082000ZS	M_WCS417_30m	M_Control	5225.6	1873.63	3549.62	1.47971	0.10402	14.2253	6.38651e-46	2.67463e-43	Up	M_WCS417_30m-M_Control	RNA	AT2G37040	PAL1	Encodes PAL1, a phenylalanine ammonia-lyase. Arabidopsis has four PALs: AT2G37040 (PAL1), AT3G53260 (PAL2), AT5G04230 (PAL3) and AT3G10340 (PAL4).
BnaA02G0058200ZS	M_WCS417_30m	M_Control	364.026	1398	881.015	-1.94088	0.136712	-14.1968	9.58546e-46	3.98142e-43	Down	M_WCS417_30m-M_Control	RNA	AT5G15190	--	--
BnaC07G0477800ZS	M_WCS417_30m	M_Control	174.688	856.914	515.801	-2.29422	0.161753	-14.1835	1.15899e-45	4.77486e-43	Down	M_WCS417_30m-M_Control	RNA	AT4G27657	--	--
BnaA09G0500200ZS	M_WCS417_30m	M_Control	390.236	1447.64	918.938	-1.8912	0.133423	-14.1745	1.31837e-45	5.38766e-43	Down	M_WCS417_30m-M_Control	RNA	AT3G54000	--	--
BnaC03G0259200ZS	M_WCS417_30m	M_Control	2483.49	786.859	1635.18	1.65788	0.117005	14.1693	1.41988e-45	5.75607e-43	Up	M_WCS417_30m-M_Control	RNA	AT2G45300	--	encodes 3-phosphoshikimate 1-carboxyvinyltransferase / 5-enolpyruvylshikimate-3-phosphate / EPSP synthase involved in chorismate biosynthesis
BnaA07G0259300ZS	M_WCS417_30m	M_Control	1196.25	292.603	744.425	2.03196	0.143508	14.1592	1.6387e-45	6.59043e-43	Up	M_WCS417_30m-M_Control	RNA	AT1G72360	HRE1	Encodes a member of the ERF (ethylene response factor) subfamily B-2 of ERF/AP2 transcription factor family. The protein contains one AP2 domain. There are 5 members in this subfamily including RAP2.2 AND RAP2.12.
Bnascaffold0027G0039600ZS	M_WCS417_30m	M_Control	2151.97	638.555	1395.26	1.75356	0.123902	14.1528	1.79401e-45	7.15826e-43	Up	M_WCS417_30m-M_Control	RNA	AT1G80920	Toc12	A nuclear encoded soluble protein found in the chloroplast stroma. Negatively regulated by light and has rapid turnover in darkness.
BnaC05G0398500ZS	M_WCS417_30m	M_Control	456.005	1616.07	1036.04	-1.82559	0.130187	-14.0229	1.12921e-44	4.47043e-42	Down	M_WCS417_30m-M_Control	RNA	AT3G19580	ZF2	Encodes zinc finger protein. mRNA levels are upregulated in response to ABA, high salt, and mild dessication. The protein is localized to the nucleus and acts as a transcriptional repressor.
BnaC05G0444500ZS	M_WCS417_30m	M_Control	141.274	746.968	444.121	-2.40247	0.171587	-14.0014	1.5278e-44	6.00153e-42	Down	M_WCS417_30m-M_Control	RNA	AT3G15670	LEA76	Late embryogenesis abundant protein (LEA) family protein
BnaC04G0500500ZS	M_WCS417_30m	M_Control	3399.58	1159.2	2279.39	1.55237	0.111086	13.9746	2.2288e-44	8.68785e-42	Up	M_WCS417_30m-M_Control	RNA	AT2G30490	REF3	Encodes a cinnamate-4-hydroxylase. Mutations in this gene impact phenylpropanoid metabolism, growth and development.
BnaA06G0100200ZS	M_WCS417_30m	M_Control	731.949	139.024	435.487	2.39713	0.171571	13.9717	2.32025e-44	8.9753e-42	Up	M_WCS417_30m-M_Control	RNA	AT1G15040	GAT1_2.1	Encodes a nitrogen regulated putative glutamine amidotransferase that represses shoot branching.
BnaA06G0141200ZS	M_WCS417_30m	M_Control	486.211	60.0229	273.117	3.01921	0.216769	13.9283	4.26677e-44	1.63799e-41	Up	M_WCS417_30m-M_Control	RNA	AT1G20070	--	--
BnaC01G0441600ZS	M_WCS417_30m	M_Control	1527.02	424.309	975.666	1.84666	0.132668	13.9194	4.82758e-44	1.83934e-41	Up	M_WCS417_30m-M_Control	RNA	AT1G54070	--	Dormancy/auxin associated family protein
BnaA07G0228800ZS	M_WCS417_30m	M_Control	592.429	1978.21	1285.32	-1.73973	0.125056	-13.9116	5.38867e-44	2.0378e-41	Down	M_WCS417_30m-M_Control	RNA	AT1G80840	WRKY40	Pathogen-induced transcription factor. Binds W-box sequences in vitro. Forms protein complexes with itself and with WRKY40 and WRKY60. Coexpression with WRKY18 or WRKY60 made plants more susceptible to both P. syringae and B. cinerea. WRKY18, WRKY40, and WRKY60 have partially redundant roles in response to the hemibiotrophic bacterial pathogen Pseudomonas syringae and the necrotrophic fungal path…
BnaA03G0358900ZS	M_WCS417_30m	M_Control	777.676	2423.01	1600.34	-1.63962	0.117914	-13.9053	5.88589e-44	2.20935e-41	Down	M_WCS417_30m-M_Control	RNA	AT3G19580	ZF2	Encodes zinc finger protein. mRNA levels are upregulated in response to ABA, high salt, and mild dessication. The protein is localized to the nucleus and acts as a transcriptional repressor.
BnaA03G0020000ZS	M_WCS417_30m	M_Control	1929.37	589.786	1259.58	1.71021	0.123027	13.9011	6.23936e-44	2.3248e-41	Up	M_WCS417_30m-M_Control	RNA	AT5G05440	RCAR8	Encodes a member of the PYR (pyrabactin resistance )/PYL(PYR1-like)/RCAR (regulatory components of ABA receptor) family proteins with 14 members. PYR/PYL/RCAR family proteins function as abscisic acid sensors. Mediate ABA-dependent regulation of protein phosphatase 2Cs ABI1 and ABI2.
BnaA03G0218300ZS	M_WCS417_30m	M_Control	5720.97	2014.45	3867.71	1.50603	0.108346	13.9002	6.32047e-44	2.33783e-41	Up	M_WCS417_30m-M_Control	RNA	AT2G44790	UCC2	Encodes a uclacyanin, a protein precursor that is closely related to precursors of stellacyanins and a blue copper protein from pea pods.
BnaA03G0019700ZS	M_WCS417_30m	M_Control	1881.85	575.33	1228.59	1.70986	0.123612	13.8325	1.62346e-43	5.96137e-41	Up	M_WCS417_30m-M_Control	RNA	AT5G05440	RCAR8	Encodes a member of the PYR (pyrabactin resistance )/PYL(PYR1-like)/RCAR (regulatory components of ABA receptor) family proteins with 14 members. PYR/PYL/RCAR family proteins function as abscisic acid sensors. Mediate ABA-dependent regulation of protein phosphatase 2Cs ABI1 and ABI2.
BnaC03G0093300ZS	M_WCS417_30m	M_Control	947.542	202.187	574.864	2.22947	0.161288	13.8229	1.85452e-43	6.76087e-41	Up	M_WCS417_30m-M_Control	RNA	AT3G06190	BPM2	Encodes a member of the MATH-BTB domain proteins (BPMs) that directly interact with and target for proteasomal degradation the class I homeobox-leucine zipper (HD-ZIP) transcription factor ATHB6. Known members include AT5G19000 (BPM1), AT3G06190 (BPM2), AT2G39760 (BPM3), AT3G03740 (BPM4), AT5G21010 (BPM5) and AT3G43700 (BPM6).
BnaA07G0135600ZS	M_WCS417_30m	M_Control	420.799	38.6793	229.739	3.44795	0.249575	13.8153	2.06189e-43	7.46317e-41	Up	M_WCS417_30m-M_Control	RNA	AT1G20070	--	--
BnaC05G0238200ZS	M_WCS417_30m	M_Control	3588.18	9451.74	6519.96	-1.39738	0.101198	-13.8084	2.26839e-43	8.15238e-41	Down	M_WCS417_30m-M_Control	RNA	AT1G27730	ZAT10	Related to Cys2/His2-type zinc-finger proteins found in higher plants. Compensated for a subset of calcineurin deficiency in yeast. Salt tolerance produced by ZAT10 appeared to be partially dependent on ENA1/PMR2, a P-type ATPase required for Li+ and Na+ efflux in yeast. The protein is localized to the nucleus, acts as a transcriptional repressor and is responsive to chitin oligomers. Also involv…
BnaA07G0183300ZS	M_WCS417_30m	M_Control	483.058	56.3737	269.716	3.10369	0.225156	13.7846	3.15295e-43	1.12516e-40	Up	M_WCS417_30m-M_Control	RNA	AT3G53260	PAL2	Encodes phenylalanine lyase. Arabidopsis has four PALs: AT2G37040 (PAL1), AT3G53260 (PAL2), AT5G04230 (PAL3) and AT3G10340 (PAL4).
BnaC02G0112600ZS	M_WCS417_30m	M_Control	1535.8	420.581	978.192	1.86978	0.135841	13.7645	4.16674e-43	1.4702e-40	Up	M_WCS417_30m-M_Control	RNA	AT5G22630	ADT5	Encodes a plastid-localized arogenate dehydratase involved in phenylalanine biosynthesis. Not less than six genes encoding ADT were identi&#64257;ed in the Arabidopsis genome: ADT1 [At1g11790]; ADT2 [At3g07630]; ADT3 [At2g27820]; ADT4 [At3g44720]; ADT5 [At5g22630]; and ADT6 [At1g08250].
BnaC04G0294900ZS	M_WCS417_30m	M_Control	327.038	1309.82	818.43	-2.00195	0.145445	-13.7643	4.17785e-43	1.4702e-40	Down	M_WCS417_30m-M_Control	RNA	AT3G57930	--	--
BnaA04G0059000ZS	M_WCS417_30m	M_Control	421.61	1573.59	997.598	-1.89958	0.138201	-13.745	5.45445e-43	1.9062e-40	Down	M_WCS417_30m-M_Control	RNA	AT4G14450	PH1	--
BnaC02G0277500ZS	M_WCS417_30m	M_Control	864.934	2632.42	1748.68	-1.60551	0.116998	-13.7225	7.4426e-43	2.58319e-40	Down	M_WCS417_30m-M_Control	RNA	AT1G73540	NUDT21	nudix hydrolase homolog 21
BnaA08G0215300ZS	M_WCS417_30m	M_Control	613.716	92.2771	352.996	2.73815	0.199589	13.719	7.81854e-43	2.69522e-40	Up	M_WCS417_30m-M_Control	RNA	AT1G02250	NAC005	NAC domain containing protein 5
BnaA07G0364400ZS	M_WCS417_30m	M_Control	1260.82	323.756	792.286	1.95988	0.142915	13.7136	8.41681e-43	2.88156e-40	Up	M_WCS417_30m-M_Control	RNA	AT1G76790	IGMT5	O-methyltransferase family protein
BnaA05G0434300ZS	M_WCS417_30m	M_Control	940.317	2975.04	1957.68	-1.66174	0.121179	-13.7131	8.47284e-43	2.88156e-40	Down	M_WCS417_30m-M_Control	RNA	AT3G11410	PP2CA	Encodes protein phosphatase 2C. Negative regulator of ABA signalling. Expressed in seeds during germination. mRNA up-regulated by drought and ABA.
BnaC08G0173700ZS	M_WCS417_30m	M_Control	386.265	1417.37	901.816	-1.87539	0.136911	-13.6979	1.04529e-42	3.50788e-40	Down	M_WCS417_30m-M_Control	RNA	AT4G27657	--	--
BnaC04G0438600ZS	M_WCS417_30m	M_Control	971.636	2855.42	1913.53	-1.55506	0.114072	-13.6323	2.57516e-42	8.58511e-40	Down	M_WCS417_30m-M_Control	RNA	AT2G22500	UCP5	Encodes one of the mitochondrial dicarboxylate carriers (DIC): DIC1 (AT2G22500), DIC2 (AT4G24570), DIC3 (AT5G09470).
BnaA07G0009900ZS	M_WCS417_30m	M_Control	379.841	1387.93	883.885	-1.86963	0.137663	-13.5812	5.17461e-42	1.71384e-39	Down	M_WCS417_30m-M_Control	RNA	AT2G19710	ISTL5	Regulator of Vps4 activity in the MVB pathway protein
BnaC09G0442000ZS	M_WCS417_30m	M_Control	813.131	2418.17	1615.65	-1.57223	0.116873	-13.4525	2.97836e-41	9.80034e-39	Down	M_WCS417_30m-M_Control	RNA	AT5G60680	--	Protein of unknown function, DUF584
BnaC06G0187300ZS	M_WCS417_30m	M_Control	182.85	824.816	503.833	-2.17347	0.1618	-13.433	3.87254e-41	1.26604e-38	Down	M_WCS417_30m-M_Control	RNA	AT3G54000	--	--
BnaA09G0044300ZS	M_WCS417_30m	M_Control	1812.21	566.129	1189.17	1.67908	0.12544	13.3856	7.34226e-41	2.38501e-38	Up	M_WCS417_30m-M_Control	RNA	AT3G29200	CM1	L-ascorbate peroxidase
BnaC03G0115000ZS	M_WCS417_30m	M_Control	863.139	198.834	530.987	2.11689	0.158234	13.3782	8.10387e-41	2.61564e-38	Up	M_WCS417_30m-M_Control	RNA	AT5G59780	MYB59	Encodes a putative transcription factor (MYB59).
BnaC01G0394800ZS	M_WCS417_30m	M_Control	303.456	1179.88	741.668	-1.95969	0.1465	-13.3767	8.27641e-41	2.65442e-38	Down	M_WCS417_30m-M_Control	RNA	AT3G19580	ZF2	Encodes zinc finger protein. mRNA levels are upregulated in response to ABA, high salt, and mild dessication. The protein is localized to the nucleus and acts as a transcriptional repressor.
BnaC07G0317400ZS	M_WCS417_30m	M_Control	1171.59	3275.67	2223.63	-1.4833	0.111824	-13.2646	3.71197e-40	1.18302e-37	Down	M_WCS417_30m-M_Control	RNA	AT3G29010	--	Biotin/lipoate A/B protein ligase family
BnaC04G0552000ZS	M_WCS417_30m	M_Control	1061.21	265.641	663.427	1.99681	0.150574	13.2613	3.88041e-40	1.22897e-37	Up	M_WCS417_30m-M_Control	RNA	AT2G36880	MAT3	methionine adenosyltransferase 3
BnaA01G0026000ZS	M_WCS417_30m	M_Control	999.196	2844.1	1921.65	-1.50914	0.113881	-13.2519	4.39991e-40	1.38485e-37	Down	M_WCS417_30m-M_Control	RNA	AT4G35940	--	--
BnaA06G0129600ZS	M_WCS417_30m	M_Control	879.186	2532.3	1705.74	-1.52625	0.115375	-13.2286	5.99783e-40	1.87614e-37	Down	M_WCS417_30m-M_Control	RNA	AT1G18740	B1L	Protein of unknown function (DUF793)
BnaC08G0286600ZS	M_WCS417_30m	M_Control	834.912	191.026	512.969	2.12929	0.161372	13.1949	9.38202e-40	2.91671e-37	Up	M_WCS417_30m-M_Control	RNA	AT5G08640	FLS1	Encodes a flavonol synthase that catalyzes formation of flavonols from dihydroflavonols. Co-expressed with CHI and CHS (qRT-PCR).
BnaC07G0007400ZS	M_WCS417_30m	M_Control	4893.98	1820.78	3357.38	1.42613	0.108274	13.1715	1.28088e-39	3.95775e-37	Up	M_WCS417_30m-M_Control	RNA	AT5G48930	HCT	At5g48930 has been shown to encode for the hydroxycinnamoyl-Coenzyme A shikimate/quinate hydroxycinnamoyltransferase (HCT) both synthesizing and catabolizing the hydroxycinnamoylesters (coumaroyl/caffeoyl shikimate and quinate) involved in the phenylpropanoid pathway. Influence on the accumulation of flavonoids which in turn inhibit auxin transport and reduce plant growth.
BnaA07G0320800ZS	M_WCS417_30m	M_Control	890.35	2524.99	1707.67	-1.50389	0.115198	-13.0549	5.95966e-39	1.8303e-36	Down	M_WCS417_30m-M_Control	RNA	AT1G70740	--	Protein kinase superfamily protein
BnaA06G0125300ZS	M_WCS417_30m	M_Control	233.168	924.703	578.936	-1.98765	0.152357	-13.046	6.69476e-39	2.04368e-36	Down	M_WCS417_30m-M_Control	RNA	AT1G18300	NUDT4	nudix hydrolase homolog 4
BnaA03G0073900ZS	M_WCS417_30m	M_Control	205.115	878.96	542.038	-2.09945	0.161004	-13.0397	7.27376e-39	2.20713e-36	Down	M_WCS417_30m-M_Control	RNA	AT3G03280	--	--
BnaA07G0111900ZS	M_WCS417_30m	M_Control	2602.99	879.007	1741	1.56549	0.120145	13.03	8.25568e-39	2.49017e-36	Up	M_WCS417_30m-M_Control	RNA	AT1G27130	GSTU13	Encodes glutathione transferase belonging to the tau class of GSTs. Naming convention according to Wagner et al. (2002).
BnaC09G0101000ZS	M_WCS417_30m	M_Control	308.116	1148.83	728.472	-1.89923	0.145788	-13.0274	8.5518e-39	2.56422e-36	Down	M_WCS417_30m-M_Control	RNA	AT5G66400	RAB18	Belongs to the dehydrin protein family, which contains highly conserved stretches of 7-17 residues that are repetitively scattered in their sequences, the K-, S-, Y- and lysine rich segments. ABA- and drought-induced glycine-rice dehydrin protein. The ABA-induced expression of RAB18 was reduced following ACC application, indicating that ethylene inhibits the ABA signaling pathway. RAB18 is also e…
BnaC02G0533000ZS	M_WCS417_30m	M_Control	203.884	856.311	530.097	-2.07064	0.159021	-13.0212	9.27335e-39	2.76422e-36	Down	M_WCS417_30m-M_Control	RNA	AT5G62520	SRO5	Encodes a protein with similarity to RCD1 but without the WWE domain. The protein does have a PARP signature upstream of the C-terminal protein interaction domain. The PARP signature may bind NAD+ and attach the ADP-ribose-moiety from NAD+ to the target molecule. Its presence suggests a role for the protein in ADP ribosylation. Up-regulated by NaCl. SRO5 and P5CDH (an overlapping gene in the anti…
BnaC03G0813600ZS	M_WCS417_30m	M_Control	881.06	219.362	550.211	2.00614	0.154365	12.9961	1.28794e-38	3.81668e-36	Up	M_WCS417_30m-M_Control	RNA	AT1G55740	SIP1	seed imbibition 1
BnaC01G0155400ZS	M_WCS417_30m	M_Control	1574.51	497.665	1036.09	1.66182	0.128166	12.9662	1.90266e-38	5.60555e-36	Up	M_WCS417_30m-M_Control	RNA	AT4G22590	TPPG	Haloacid dehalogenase-like hydrolase (HAD) superfamily protein
BnaA10G0175100ZS	M_WCS417_30m	M_Control	1340.57	399.69	870.129	1.74645	0.134787	12.9571	2.14328e-38	6.27796e-36	Up	M_WCS417_30m-M_Control	RNA	AT5G20250	RS6	encodes a member of glycosyl hydrolase family 36. Expression is induced within 3 hours of dark treatment, in senescing leaves and treatment with exogenous photosynthesis inhibitor. Induction of gene expression was suppressed in excised leaves supplied with sugar. The authors suggest that the gene's expression pattern is responding to the level of sugar in the cell.
BnaC07G0312700ZS	M_WCS417_30m	M_Control	303.503	1105.03	704.265	-1.86464	0.144056	-12.9439	2.54441e-38	7.41007e-36	Down	M_WCS417_30m-M_Control	RNA	AT3G28340	GolS8	Encodes a protein with putative galacturonosyltransferase activity.
BnaA02G0292900ZS	M_WCS417_30m	M_Control	334.732	1229.05	781.89	-1.87684	0.145011	-12.9427	2.58357e-38	7.48114e-36	Down	M_WCS417_30m-M_Control	RNA	AT5G45340	CYP707A3	Encodes a protein with ABA 8'-hydroxylase activity; involved in ABA catabolism. Mutant analyses show that disruption in the gene results in more drought tolerance whereas overexpression results in increased transpiration rate and reduced drought tolerance. Gene involved in postgermination growth. Plant P450 CYP707A3, ABA 8'-hydroxylase, binds enantioselectively (+)-ABA but not (-)-ABA, whereas th…
BnaA09G0593900ZS	M_WCS417_30m	M_Control	1042.51	275.003	658.756	1.92126	0.148818	12.9101	3.94783e-38	1.13666e-35	Up	M_WCS417_30m-M_Control	RNA	AT2G22250	PAT	Encodes a prokaryotic-type plastidic aspartate aminotransferase with glutamate/aspartate-prephenate aminotransferase (PAT) activity.
BnaA07G0385400ZS	M_WCS417_30m	M_Control	1185	3213.94	2199.47	-1.43959	0.111559	-12.9043	4.25424e-38	1.21796e-35	Down	M_WCS417_30m-M_Control	RNA	AT1G80840	WRKY40	Pathogen-induced transcription factor. Binds W-box sequences in vitro. Forms protein complexes with itself and with WRKY40 and WRKY60. Coexpression with WRKY18 or WRKY60 made plants more susceptible to both P. syringae and B. cinerea. WRKY18, WRKY40, and WRKY60 have partially redundant roles in response to the hemibiotrophic bacterial pathogen Pseudomonas syringae and the necrotrophic fungal path…
BnaC02G0166900ZS	M_WCS417_30m	M_Control	1820.12	4648.98	3234.55	-1.35293	0.104945	-12.8919	5.00044e-38	1.42355e-35	Down	M_WCS417_30m-M_Control	RNA	AT4G27270	--	Quinone reductase family protein
BnaA08G0252700ZS	M_WCS417_30m	M_Control	13.6338	328.413	171.023	-4.5827	0.356194	-12.8657	7.01789e-38	1.98673e-35	Down	M_WCS417_30m-M_Control	RNA	AT1G19210	ERF17	encodes a member of the DREB subfamily A-5 of ERF/AP2 transcription factor family. The protein contains one AP2 domain. There are 15 members in this subfamily including RAP2.1, RAP2.9 and RAP2.10.
BnaC07G0492700ZS	M_WCS417_30m	M_Control	2457.13	786.008	1621.57	1.64329	0.127871	12.8511	8.48059e-38	2.38747e-35	Up	M_WCS417_30m-M_Control	RNA	AT4G29900	CIF1	--
BnaA09G0388700ZS	M_WCS417_30m	M_Control	1897.74	4874.29	3386.01	-1.36083	0.105897	-12.8505	8.54697e-38	2.39287e-35	Down	M_WCS417_30m-M_Control	RNA	AT1G32920	--	--
BnaC08G0105800ZS	M_WCS417_30m	M_Control	767.753	2223.35	1495.55	-1.53379	0.120025	-12.7789	2.15047e-37	5.98753e-35	Down	M_WCS417_30m-M_Control	RNA	AT1G32920	--	--
BnaC04G0351500ZS	M_WCS417_30m	M_Control	339.329	1235.08	787.207	-1.86457	0.146093	-12.7629	2.64316e-37	7.31909e-35	Down	M_WCS417_30m-M_Control	RNA	AT4G14450	PH1	--
BnaA09G0592200ZS	M_WCS417_30m	M_Control	3659.02	8731.91	6195.47	-1.25483	0.0989521	-12.6812	7.51862e-37	2.07064e-34	Down	M_WCS417_30m-M_Control	RNA	AT2G22500	UCP5	Encodes one of the mitochondrial dicarboxylate carriers (DIC): DIC1 (AT2G22500), DIC2 (AT4G24570), DIC3 (AT5G09470).
BnaC07G0144600ZS	M_WCS417_30m	M_Control	743.873	2194.55	1469.21	-1.56114	0.123112	-12.6807	7.5652e-37	2.07221e-34	Down	M_WCS417_30m-M_Control	RNA	AT1G28370	ERF11	encodes a member of the ERF (ethylene response factor) subfamily B-1 of ERF/AP2 transcription factor family. The protein contains one AP2 domain. There are 15 members in this subfamily including ATERF-3, ATERF-4, ATERF-7, and leafy petiole.
BnaC05G0252300ZS	M_WCS417_30m	M_Control	321.019	1169.38	745.202	-1.86544	0.14717	-12.6754	8.09159e-37	2.20448e-34	Down	M_WCS417_30m-M_Control	RNA	AT1G29340	PUB17	Encodes a protein containing a UND, a U-box, and an ARM domain. This protein has E3 ubiquitin ligase activity. It is required for cell death and full resistance specified by Arabidopsis RPM1 and RPS4 resistance proteins against Pseudomonas syringae pv tomato.
BnaC04G0014800ZS	M_WCS417_30m	M_Control	370.266	1335.93	853.096	-1.85057	0.146127	-12.6641	9.34744e-37	2.53301e-34	Down	M_WCS417_30m-M_Control	RNA	AT2G46490	--	--
BnaC05G0570800ZS	M_WCS417_30m	M_Control	3132.81	1190.87	2161.84	1.39537	0.110213	12.6607	9.76785e-37	2.63285e-34	Up	M_WCS417_30m-M_Control	RNA	AT3G02360	PGD2	6-phosphogluconate dehydrogenase family protein
BnaC07G0169100ZS	M_WCS417_30m	M_Control	1893.43	627.577	1260.51	1.59285	0.125969	12.6448	1.19535e-36	3.20493e-34	Up	M_WCS417_30m-M_Control	RNA	AT1G27130	GSTU13	Encodes glutathione transferase belonging to the tau class of GSTs. Naming convention according to Wagner et al. (2002).
BnaC02G0127300ZS	M_WCS417_30m	M_Control	708.288	2056.9	1382.59	-1.5379	0.121799	-12.6265	1.50854e-36	4.02336e-34	Down	M_WCS417_30m-M_Control	RNA	AT5G59550	RDUF2	Encodes an ABA- and drought-induced RING-DUF1117 gene whose mutation results in hyposensitive phenotypes toward ABA in terms of germination rate and stomatal closure and markedly reduced tolerance to drought stress relative to wild-type plants.
BnaC07G0477700ZS	M_WCS417_30m	M_Control	325.521	1156.26	740.893	-1.82903	0.144921	-12.6209	1.6186e-36	4.29429e-34	Down	M_WCS417_30m-M_Control	RNA	AT4G27657	--	--
BnaA01G0110600ZS	M_WCS417_30m	M_Control	1656.28	525.558	1090.92	1.65701	0.131314	12.6186	1.66709e-36	4.3999e-34	Up	M_WCS417_30m-M_Control	RNA	AT4G20780	CML42	Calcium sensor involved in trichome branching.
Bnascaffold0156G0000100ZS	M_WCS417_30m	M_Control	1909.56	646.727	1278.14	1.56245	0.123952	12.6053	1.97335e-36	5.18123e-34	Up	M_WCS417_30m-M_Control	RNA	AT1G80920	Toc12	A nuclear encoded soluble protein found in the chloroplast stroma. Negatively regulated by light and has rapid turnover in darkness.
BnaC01G0082000ZS	M_WCS417_30m	M_Control	1060.89	2826.14	1943.51	-1.41353	0.112218	-12.5963	2.2132e-36	5.78103e-34	Down	M_WCS417_30m-M_Control	RNA	AT4G30440	GAE1	UDP-D-glucuronate 4-epimerase
BnaA06G0283700ZS	M_WCS417_30m	M_Control	194.689	797.062	495.876	-2.0336	0.16161	-12.5834	2.60572e-36	6.7714e-34	Down	M_WCS417_30m-M_Control	RNA	AT5G63130	--	Octicosapeptide/Phox/Bem1p family protein
BnaC06G0453200ZS	M_WCS417_30m	M_Control	1259.44	3279.02	2269.23	-1.38053	0.10989	-12.5629	3.37602e-36	8.72838e-34	Down	M_WCS417_30m-M_Control	RNA	AT1G80840	WRKY40	Pathogen-induced transcription factor. Binds W-box sequences in vitro. Forms protein complexes with itself and with WRKY40 and WRKY60. Coexpression with WRKY18 or WRKY60 made plants more susceptible to both P. syringae and B. cinerea. WRKY18, WRKY40, and WRKY60 have partially redundant roles in response to the hemibiotrophic bacterial pathogen Pseudomonas syringae and the necrotrophic fungal path…
BnaC07G0197600ZS	M_WCS417_30m	M_Control	506.443	90.5725	298.508	2.48289	0.198297	12.521	5.7281e-36	1.47343e-33	Up	M_WCS417_30m-M_Control	RNA	AT1G20070	--	--
BnaC05G0488500ZS	M_WCS417_30m	M_Control	914.378	2535.64	1725.01	-1.47127	0.117581	-12.5128	6.35779e-36	1.62714e-33	Down	M_WCS417_30m-M_Control	RNA	AT3G11410	PP2CA	Encodes protein phosphatase 2C. Negative regulator of ABA signalling. Expressed in seeds during germination. mRNA up-regulated by drought and ABA.
BnaA03G0101500ZS	M_WCS417_30m	M_Control	247.366	920.295	583.83	-1.89519	0.151556	-12.5049	7.02131e-36	1.78793e-33	Down	M_WCS417_30m-M_Control	RNA	AT5G59720	HSP18.2	encodes a low molecular weight heat shock protein that contains the heat shock element in the promoter region. Expression is induced in response to heat shock.
BnaA06G0043600ZS	M_WCS417_30m	M_Control	617.24	116.184	366.712	2.40785	0.192766	12.4911	8.35101e-36	2.1159e-33	Up	M_WCS417_30m-M_Control	RNA	AT1G23730	BCA3	beta carbonic anhydrase 3
BnaA03G0342200ZS	M_WCS417_30m	M_Control	945.224	249.958	597.591	1.91799	0.153907	12.4621	1.20235e-35	3.03125e-33	Up	M_WCS417_30m-M_Control	RNA	AT3G15630	--	--
BnaC02G0542300ZS	M_WCS417_30m	M_Control	729.407	2061.01	1395.21	-1.49869	0.120421	-12.4454	1.48159e-35	3.71673e-33	Down	M_WCS417_30m-M_Control	RNA	AT5G64310	ATAGP1	Encodes arabinogalactan-protein (AGP1).
BnaA02G0207100ZS	M_WCS417_30m	M_Control	355.012	1210.31	782.661	-1.76991	0.142433	-12.4263	1.88225e-35	4.6894e-33	Down	M_WCS417_30m-M_Control	RNA	AT1G73540	NUDT21	nudix hydrolase homolog 21
BnaC01G0433800ZS	M_WCS417_30m	M_Control	260.737	956.203	608.47	-1.87463	0.150863	-12.426	1.88783e-35	4.6894e-33	Down	M_WCS417_30m-M_Control	RNA	AT3G15210	RAP2.5	Encodes a member of the ERF (ethylene response factor) subfamily B-1 of ERF/AP2 transcription factor family (ATERF-4). The protein contains one AP2 domain. Acts as a negative regulator of JA-responsive defense gene expression and resistance to the necrotrophic fungal pathogen Fusarium oxysporum and antagonizes JA inhibition of root elongation.
BnaC05G0170400ZS	M_WCS417_30m	M_Control	338.591	27.306	182.949	3.61689	0.291185	12.4213	2.00335e-35	4.9521e-33	Up	M_WCS417_30m-M_Control	RNA	AT1G20070	--	--
BnaA05G0364000ZS	M_WCS417_30m	M_Control	492.11	1526.65	1009.38	-1.63371	0.131543	-12.4196	2.04521e-35	5.03102e-33	Down	M_WCS417_30m-M_Control	RNA	AT3G19580	ZF2	Encodes zinc finger protein. mRNA levels are upregulated in response to ABA, high salt, and mild dessication. The protein is localized to the nucleus and acts as a transcriptional repressor.
BnaC09G0602900ZS	M_WCS417_30m	M_Control	844.439	2299.29	1571.87	-1.44516	0.116375	-12.4181	2.08384e-35	5.10129e-33	Down	M_WCS417_30m-M_Control	RNA	AT5G04340	ZAT6	putative c2h2 zinc finger transcription factor mRNA,
BnaC01G0254400ZS	M_WCS417_30m	M_Control	4965.88	2022.62	3494.25	1.29569	0.104379	12.4133	2.21247e-35	5.39013e-33	Up	M_WCS417_30m-M_Control	RNA	AT4G13310	CYP71A20	putative cytochrome P450
BnaA05G0396800ZS	M_WCS417_30m	M_Control	195.379	820.885	508.132	-2.07128	0.167003	-12.4026	2.52879e-35	6.13128e-33	Down	M_WCS417_30m-M_Control	RNA	AT3G15670	LEA76	Late embryogenesis abundant protein (LEA) family protein
BnaC06G0444600ZS	M_WCS417_30m	M_Control	7420.98	3105.78	5263.38	1.25667	0.101463	12.3855	3.1296e-35	7.55188e-33	Up	M_WCS417_30m-M_Control	RNA	AT1G78830	MNB1	Curculin-like (mannose-binding) lectin family protein
BnaA03G0195500ZS	M_WCS417_30m	M_Control	3609.07	8452.28	6030.67	-1.22771	0.0992222	-12.3733	3.64363e-35	8.75058e-33	Down	M_WCS417_30m-M_Control	RNA	AT2G40000	HSPRO2	ortholog of sugar beet HS1 PRO-1 2
BnaC03G0795800ZS	M_WCS417_30m	M_Control	258.792	969.983	614.388	-1.90542	0.154302	-12.3487	4.95095e-35	1.18342e-32	Down	M_WCS417_30m-M_Control	RNA	AT3G15210	RAP2.5	Encodes a member of the ERF (ethylene response factor) subfamily B-1 of ERF/AP2 transcription factor family (ATERF-4). The protein contains one AP2 domain. Acts as a negative regulator of JA-responsive defense gene expression and resistance to the necrotrophic fungal pathogen Fusarium oxysporum and antagonizes JA inhibition of root elongation.
BnaA02G0041500ZS	M_WCS417_30m	M_Control	3222.67	1259.43	2241.05	1.35541	0.109766	12.3482	4.98243e-35	1.18532e-32	Up	M_WCS417_30m-M_Control	RNA	AT5G11670	NADP-ME2	The malic enzyme (EC 1.1.1.40) encoded by AtNADP-ME2 is presumably a cytosolic enzyme involved in malate metabolism and possibly assisting the oxidative pentose phosphate pathway. AtNADP-ME2 counts for the major part of NADP-ME activity in mature tissues of Arabidopsis.
BnaA04G0299000ZS	M_WCS417_30m	M_Control	1561.04	512.9	1036.97	1.60653	0.130106	12.3478	5.00569e-35	1.18532e-32	Up	M_WCS417_30m-M_Control	RNA	AT2G47550	PMEI-PME20	Plant invertase/pectin methylesterase inhibitor superfamily
BnaA09G0382000ZS	M_WCS417_30m	M_Control	4147.89	1672.65	2910.27	1.31026	0.106436	12.3104	7.96391e-35	1.87704e-32	Up	M_WCS417_30m-M_Control	RNA	AT1G33590	--	Leucine-rich repeat (LRR) family protein
BnaA02G0132900ZS	M_WCS417_30m	M_Control	2243.41	5401.35	3822.38	-1.26761	0.103387	-12.2608	1.47085e-34	3.45063e-32	Down	M_WCS417_30m-M_Control	RNA	AT5G54490	PBP1	Encodes a PINOID (PID)-binding protein containing putative EF-hand calcium-binding motifs. The interaction is dependent on the presence of calcium. mRNA expression is up-regulated by auxin. Not a phosphorylation target of PID, likely acts upstream of PID to regulate the activity of this protein in response to changes in calcium levels.
BnaC06G0374200ZS	M_WCS417_30m	M_Control	1094.6	2898.84	1996.72	-1.40524	0.114752	-12.2458	1.76834e-34	4.12943e-32	Down	M_WCS417_30m-M_Control	RNA	AT1G70740	--	Protein kinase superfamily protein
BnaC02G0526800ZS	M_WCS417_30m	M_Control	731.186	2060.24	1395.71	-1.49431	0.12228	-12.2204	2.41963e-34	5.60342e-32	Down	M_WCS417_30m-M_Control	RNA	AT5G61600	ERF104	encodes a member of the ERF (ethylene response factor) subfamily B-3 of ERF/AP2 transcription factor family. The protein contains one AP2 domain. There are 18 members in this subfamily including ATERF-1, ATERF-2, AND ATERF-5.
BnaC03G0342000ZS	M_WCS417_30m	M_Control	904.319	2443.94	1674.13	-1.43412	0.117355	-12.2203	2.42165e-34	5.60342e-32	Down	M_WCS417_30m-M_Control	RNA	AT5G15140	PEG9	Galactose mutarotase-like superfamily protein
BnaA02G0394000ZS	M_WCS417_30m	M_Control	367.79	1259.34	813.564	-1.7751	0.145272	-12.2191	2.45653e-34	5.65827e-32	Down	M_WCS417_30m-M_Control	RNA	AT5G61600	ERF104	encodes a member of the ERF (ethylene response factor) subfamily B-3 of ERF/AP2 transcription factor family. The protein contains one AP2 domain. There are 18 members in this subfamily including ATERF-1, ATERF-2, AND ATERF-5.
BnaC09G0295000ZS	M_WCS417_30m	M_Control	1289.57	3262.97	2276.27	-1.33924	0.109921	-12.1836	3.79984e-34	8.71281e-32	Down	M_WCS417_30m-M_Control	RNA	AT4G11280	ATACS6	encodes a a member of the 1-aminocyclopropane-1-carboxylate (ACC) synthase (S-adenosyl-L-methionine methylthioadenosine-lyase, EC 4.4.1.14) gene family
BnaA08G0218200ZS	M_WCS417_30m	M_Control	3181.34	7716.95	5449.15	-1.27833	0.105072	-12.1663	4.69795e-34	1.07236e-31	Down	M_WCS417_30m-M_Control	RNA	AT1G27730	ZAT10	Related to Cys2/His2-type zinc-finger proteins found in higher plants. Compensated for a subset of calcineurin deficiency in yeast. Salt tolerance produced by ZAT10 appeared to be partially dependent on ENA1/PMR2, a P-type ATPase required for Li+ and Na+ efflux in yeast. The protein is localized to the nucleus, acts as a transcriptional repressor and is responsive to chitin oligomers. Also involv…
BnaA08G0257600ZS	M_WCS417_30m	M_Control	1060.52	2742.17	1901.34	-1.37065	0.113006	-12.129	7.41738e-34	1.67798e-31	Down	M_WCS417_30m-M_Control	RNA	AT1G18300	NUDT4	nudix hydrolase homolog 4
BnaC01G0080800ZS	M_WCS417_30m	M_Control	1744.94	607.018	1175.98	1.52373	0.125711	12.121	8.1785e-34	1.84194e-31	Up	M_WCS417_30m-M_Control	RNA	AT4G30530	GGP1	Encodes a gamma-glutamyl peptidase, outside the GGT family, that can hydrolyze gamma-glutamyl peptide bonds.
BnaA04G0207500ZS	M_WCS417_30m	M_Control	559.373	1608.76	1084.07	-1.52408	0.125841	-12.1111	9.22021e-34	2.06737e-31	Down	M_WCS417_30m-M_Control	RNA	AT2G31880	SOBIR1	Encodes a putative leucine rich repeat transmembrane protein that is expressed in response to Pseudomonas syringae. Expression of SRRLK may be required for silencing via lsiRNAs. Regulates cell death and innate immunity.
BnaA01G0322600ZS	M_WCS417_30m	M_Control	1219.06	3084.7	2151.88	-1.33935	0.110717	-12.097	1.09512e-33	2.43396e-31	Down	M_WCS417_30m-M_Control	RNA	AT3G19030	--	--
BnaC01G0015600ZS	M_WCS417_30m	M_Control	776.327	202.899	489.613	1.93521	0.16003	12.0928	1.15268e-33	2.5507e-31	Up	M_WCS417_30m-M_Control	RNA	AT4G37610	BT5	BTB and TAZ domain protein. Located in cytoplasm and expressed in fruit, flower and leaves.
BnaC05G0124500ZS	M_WCS417_30m	M_Control	1077.86	326.963	702.412	1.72156	0.142515	12.0798	1.35054e-33	2.97553e-31	Up	M_WCS417_30m-M_Control	RNA	AT1G15040	GAT1_2.1	Encodes a nitrogen regulated putative glutamine amidotransferase that represses shoot branching.
BnaA02G0239700ZS	M_WCS417_30m	M_Control	1403.68	3549.26	2476.47	-1.33848	0.110876	-12.0718	1.48799e-33	3.26417e-31	Down	M_WCS417_30m-M_Control	RNA	AT1G80840	WRKY40	Pathogen-induced transcription factor. Binds W-box sequences in vitro. Forms protein complexes with itself and with WRKY40 and WRKY60. Coexpression with WRKY18 or WRKY60 made plants more susceptible to both P. syringae and B. cinerea. WRKY18, WRKY40, and WRKY60 have partially redundant roles in response to the hemibiotrophic bacterial pathogen Pseudomonas syringae and the necrotrophic fungal path…
Bnascaffold0027G0039200ZS	M_WCS417_30m	M_Control	1907.89	646.279	1277.08	1.56275	0.129549	12.0631	1.65505e-33	3.61501e-31	Up	M_WCS417_30m-M_Control	RNA	AT1G80920	Toc12	A nuclear encoded soluble protein found in the chloroplast stroma. Negatively regulated by light and has rapid turnover in darkness.
BnaC02G0317500ZS	M_WCS417_30m	M_Control	1382.25	402.795	892.521	1.77692	0.147333	12.0606	1.70625e-33	3.71084e-31	Up	M_WCS417_30m-M_Control	RNA	--	--	--
BnaA05G0132000ZS	M_WCS417_30m	M_Control	7947.94	3360.42	5654.18	1.24207	0.102996	12.0594	1.73045e-33	3.74739e-31	Up	M_WCS417_30m-M_Control	RNA	AT2G30490	REF3	Encodes a cinnamate-4-hydroxylase. Mutations in this gene impact phenylpropanoid metabolism, growth and development.
BnaC07G0513600ZS	M_WCS417_30m	M_Control	1594.12	555.837	1074.98	1.52025	0.126129	12.0531	1.86747e-33	4.00983e-31	Up	M_WCS417_30m-M_Control	RNA	AT4G33420	Prx47	Peroxidase superfamily protein
BnaA10G0175300ZS	M_WCS417_30m	M_Control	1213.89	385.026	799.456	1.65663	0.137782	12.0235	2.67353e-33	5.7164e-31	Up	M_WCS417_30m-M_Control	RNA	AT5G20250	RS6	encodes a member of glycosyl hydrolase family 36. Expression is induced within 3 hours of dark treatment, in senescing leaves and treatment with exogenous photosynthesis inhibitor. Induction of gene expression was suppressed in excised leaves supplied with sugar. The authors suggest that the gene's expression pattern is responding to the level of sugar in the cell.
BnaA07G0147500ZS	M_WCS417_30m	M_Control	779.12	2212.27	1495.7	-1.50566	0.125693	-11.9788	4.58779e-33	9.76814e-31	Down	M_WCS417_30m-M_Control	RNA	AT5G66650	MCU6	Protein of unknown function (DUF607)
BnaA02G0408000ZS	M_WCS417_30m	M_Control	540.92	1589.62	1065.27	-1.55483	0.129894	-11.97	5.10567e-33	1.08253e-30	Down	M_WCS417_30m-M_Control	RNA	AT5G64310	ATAGP1	Encodes arabinogalactan-protein (AGP1).
BnaC07G0549300ZS	M_WCS417_30m	M_Control	407.378	58.8948	233.136	2.79518	0.233697	11.9607	5.70951e-33	1.20551e-30	Up	M_WCS417_30m-M_Control	RNA	AT4G38420	sks9	SKU5 similar 9
BnaA09G0523700ZS	M_WCS417_30m	M_Control	1123.64	2839.93	1981.78	-1.33759	0.112039	-11.9386	7.44252e-33	1.56491e-30	Down	M_WCS417_30m-M_Control	RNA	AT3G56880	--	VQ motif-containing protein
BnaC09G0432800ZS	M_WCS417_30m	M_Control	1494.06	3746.56	2620.31	-1.32651	0.111156	-11.9338	7.88728e-33	1.65157e-30	Down	M_WCS417_30m-M_Control	RNA	AT5G59820	ZAT12	Encodes a zinc finger protein involved in high light and cold acclimation. Overexpression of this putative transcription factor increases the expression level of 9 cold-responsive genes and represses the expression level of 15 cold-responsive genes, including CBF genes. Also, lines overexpressing this gene exhibits a small but reproducible increase in freeze tolerance. Because of the repression o…
BnaC02G0252600ZS	M_WCS417_30m	M_Control	106.813	537.898	322.356	-2.33246	0.195482	-11.9318	8.08016e-33	1.685e-30	Down	M_WCS417_30m-M_Control	RNA	AT1G70780	--	--
BnaA01G0203700ZS	M_WCS417_30m	M_Control	2740.16	1070.86	1905.51	1.35517	0.113973	11.8903	1.32959e-32	2.7613e-30	Up	M_WCS417_30m-M_Control	RNA	AT3G22890	ATPS1	encodes ATP sulfurylase, the first enzyme in the sulfate assimilation pathway of Arabidopsis. It may also participate in selenium metabolism.
BnaC05G0081400ZS	M_WCS417_30m	M_Control	594.724	113.861	354.292	2.37963	0.200232	11.8844	1.42741e-32	2.95234e-30	Up	M_WCS417_30m-M_Control	RNA	AT1G10370	GSTU17	Encodes GSTU17 (Glutathione S-Transferase U17). Functions as a negative component of stress-mediated signal transduction pathways in drought and salt stress responses.
BnaA05G0369100ZS	M_WCS417_30m	M_Control	2275.21	871.588	1573.4	1.38451	0.116575	11.8766	1.56549e-32	3.22477e-30	Up	M_WCS417_30m-M_Control	RNA	AT3G19010	--	2-oxoglutarate (2OG) and Fe(II)-dependent oxygenase superfamily protein
BnaA01G0125000ZS	M_WCS417_30m	M_Control	881.766	248.877	565.322	1.82385	0.153599	11.8741	1.61366e-32	3.31055e-30	Up	M_WCS417_30m-M_Control	RNA	AT4G22590	TPPG	Haloacid dehalogenase-like hydrolase (HAD) superfamily protein
BnaC03G0795700ZS	M_WCS417_30m	M_Control	202.877	802.458	502.667	-1.98293	0.16712	-11.8653	1.79287e-32	3.66339e-30	Down	M_WCS417_30m-M_Control	RNA	AT3G15210	RAP2.5	Encodes a member of the ERF (ethylene response factor) subfamily B-1 of ERF/AP2 transcription factor family (ATERF-4). The protein contains one AP2 domain. Acts as a negative regulator of JA-responsive defense gene expression and resistance to the necrotrophic fungal pathogen Fusarium oxysporum and antagonizes JA inhibition of root elongation.
BnaA09G0419500ZS	M_WCS417_30m	M_Control	482.693	1417.83	950.259	-1.55471	0.131102	-11.8588	1.93665e-32	3.94128e-30	Down	M_WCS417_30m-M_Control	RNA	AT4G01360	BPS3	Encodes a protein related to BYPASS1 (BPS1). Regulates production of mobile compound: bps signal.
BnaA02G0264200ZS	M_WCS417_30m	M_Control	555.681	121.896	338.789	2.18907	0.184836	11.8433	2.33207e-32	4.72702e-30	Up	M_WCS417_30m-M_Control	RNA	AT4G12090	--	Cornichon family protein
BnaC09G0369200ZS	M_WCS417_30m	M_Control	2696.41	6257.7	4477.06	-1.21452	0.10284	-11.8097	3.47702e-32	7.0197e-30	Down	M_WCS417_30m-M_Control	RNA	AT4G27270	--	Quinone reductase family protein
BnaA06G0169300ZS	M_WCS417_30m	M_Control	424.824	74.0631	249.444	2.52001	0.213566	11.7997	3.91777e-32	7.87813e-30	Up	M_WCS417_30m-M_Control	RNA	AT5G08640	FLS1	Encodes a flavonol synthase that catalyzes formation of flavonols from dihydroflavonols. Co-expressed with CHI and CHS (qRT-PCR).
BnaC03G0077100ZS	M_WCS417_30m	M_Control	1515.13	514.003	1014.57	1.55866	0.132253	11.7854	4.64048e-32	9.29454e-30	Up	M_WCS417_30m-M_Control	RNA	AT5G16010	--	3-oxo-5-alpha-steroid 4-dehydrogenase family protein
BnaA04G0283700ZS	M_WCS417_30m	M_Control	147.468	632.812	390.14	-2.1023	0.178929	-11.7494	7.11284e-32	1.41904e-29	Down	M_WCS417_30m-M_Control	RNA	AT2G44840	ERF13	encodes a member of the ERF (ethylene response factor) subfamily B-3 of ERF/AP2 transcription factor family. The protein contains one AP2 domain. There are 18 members in this subfamily including ATERF-1, ATERF-2, AND ATERF-5.
BnaC09G0029800ZS	M_WCS417_30m	M_Control	1163.94	374.438	769.19	1.63687	0.139724	11.715	1.06804e-31	2.11414e-29	Up	M_WCS417_30m-M_Control	RNA	AT3G29200	CM1	L-ascorbate peroxidase
BnaA09G0381800ZS	M_WCS417_30m	M_Control	829.251	224.154	526.702	1.88938	0.161662	11.6872	1.4817e-31	2.92155e-29	Up	M_WCS417_30m-M_Control	RNA	AT1G33700	--	Beta-glucosidase, GBA2 type family protein
BnaA03G0581400ZS	M_WCS417_30m	M_Control	686.33	166.325	426.328	2.04238	0.174983	11.6719	1.77518e-31	3.48665e-29	Up	M_WCS417_30m-M_Control	RNA	AT1G61360	--	S-locus lectin protein kinase family protein
BnaA09G0516200ZS	M_WCS417_30m	M_Control	2470	5668.01	4069	-1.19828	0.102832	-11.6529	2.21863e-31	4.3408e-29	Down	M_WCS417_30m-M_Control	RNA	AT3G55980	TZF11	salt-inducible zinc finger 1
BnaA02G0159800ZS	M_WCS417_30m	M_Control	328.928	42.0217	185.475	2.97073	0.254956	11.6519	2.24371e-31	4.373e-29	Up	M_WCS417_30m-M_Control	RNA	AT1G07440	--	NAD(P)-binding Rossmann-fold superfamily protein
BnaC01G0450900ZS	M_WCS417_30m	M_Control	679.788	1817.75	1248.77	-1.41891	0.121948	-11.6354	2.7236e-31	5.28796e-29	Down	M_WCS417_30m-M_Control	RNA	AT3G13310	DJC66	Chaperone DnaJ-domain superfamily protein
BnaA07G0210300ZS	M_WCS417_30m	M_Control	1459.49	518.078	988.784	1.49402	0.128504	11.6263	3.0295e-31	5.85941e-29	Up	M_WCS417_30m-M_Control	RNA	AT3G59970	MTHFR1	methylenetetrahydrofolate reductase MTHFR1 mRNA, complete
BnaC09G0087100ZS	M_WCS417_30m	M_Control	550.973	1544.37	1047.67	-1.48679	0.127898	-11.6249	3.08131e-31	5.93697e-29	Down	M_WCS417_30m-M_Control	RNA	AT5G65207	--	--
BnaC07G0062700ZS	M_WCS417_30m	M_Control	643.652	160.415	402.033	2.00325	0.172476	11.6146	3.47295e-31	6.66623e-29	Up	M_WCS417_30m-M_Control	RNA	AT3G44840	--	S-adenosyl-L-methionine-dependent methyltransferases superfamily protein
BnaC02G0161300ZS	M_WCS417_30m	M_Control	1283.92	436.046	859.983	1.55791	0.134225	11.6067	3.81197e-31	7.28935e-29	Up	M_WCS417_30m-M_Control	RNA	AT5G55180	--	O-Glycosyl hydrolases family 17 protein
BnaC03G0025600ZS	M_WCS417_30m	M_Control	3000.58	1215.67	2108.12	1.30352	0.112543	11.5824	5.06079e-31	9.64099e-29	Up	M_WCS417_30m-M_Control	RNA	AT5G05730	WEI2	ASA1 encodes the alpha subunit of anthranilate synthase, which catalyzes the rate-limiting step of tryptophan synthesis. ASA1 is induced by ethylene, and forms a link between ethylene signalling and auxin synthesis in roots.
BnaC01G0510700ZS	M_WCS417_30m	M_Control	636.569	158.923	397.746	2.00064	0.173273	11.5462	7.71717e-31	1.46464e-28	Up	M_WCS417_30m-M_Control	RNA	AT3G04070	SHYG	NAC domain containing protein 47
BnaC09G0144600ZS	M_WCS417_30m	M_Control	286.931	980.582	633.757	-1.77323	0.15383	-11.5272	9.62243e-31	1.81943e-28	Down	M_WCS417_30m-M_Control	RNA	AT1G63840	--	RING/U-box superfamily protein
BnaA10G0223600ZS	M_WCS417_30m	M_Control	274.855	26.7445	150.8	3.35951	0.291891	11.5095	1.18203e-30	2.22669e-28	Up	M_WCS417_30m-M_Control	RNA	AT5G13220	TIFY9	Encodes JAZ10, a member of the JASMONATE ZIM-domain (JAZ) proteins acting as repressors of jasmonate (JA) signaling. An alternatively spliced form (JAZ10.4) of JAZ10 lacks the Jas domain.
BnaC02G0197600ZS	M_WCS417_30m	M_Control	585.02	1601.55	1093.29	-1.45312	0.126449	-11.4917	1.45176e-30	2.72468e-28	Down	M_WCS417_30m-M_Control	RNA	AT1G64980	CDI	Encodes a putative nucleotide-diphospho-sugar transferase required for pollen germination and tube growth.
BnaC09G0160800ZS	M_WCS417_30m	M_Control	934.76	2359.06	1646.91	-1.33568	0.11653	-11.4621	2.04574e-30	3.82531e-28	Down	M_WCS417_30m-M_Control	RNA	AT1G63840	--	RING/U-box superfamily protein
BnaA09G0072200ZS	M_WCS417_30m	M_Control	745.51	203.461	474.485	1.87182	0.163787	11.4284	3.01663e-30	5.62003e-28	Up	M_WCS417_30m-M_Control	RNA	AT5G23490	--	--
BnaC05G0181000ZS	M_WCS417_30m	M_Control	2790.97	1154.46	1972.71	1.27359	0.111529	11.4193	3.34787e-30	6.21428e-28	Up	M_WCS417_30m-M_Control	RNA	AT1G21120	IGMT2	O-methyltransferase family protein
BnaA07G0035500ZS	M_WCS417_30m	M_Control	1863.71	718.41	1291.06	1.37519	0.120609	11.402	4.08647e-30	7.55757e-28	Up	M_WCS417_30m-M_Control	RNA	AT3G44840	--	S-adenosyl-L-methionine-dependent methyltransferases superfamily protein
BnaC07G0130800ZS	M_WCS417_30m	M_Control	309.769	979.429	644.599	-1.66062	0.145781	-11.3912	4.62467e-30	8.52184e-28	Down	M_WCS417_30m-M_Control	RNA	AT1G30370	DLAH	Encodes a mitochondria-localized class III phospholipase A1 that plays a role in seed viability.
BnaA03G0113200ZS	M_WCS417_30m	M_Control	250.589	852.412	551.5	-1.76611	0.155087	-11.3879	4.80638e-30	8.82459e-28	Down	M_WCS417_30m-M_Control	RNA	AT5G57100	--	Nucleotide/sugar transporter family protein
BnaC05G0153600ZS	M_WCS417_30m	M_Control	703.402	173.728	438.565	2.01423	0.17705	11.3766	5.46953e-30	1.00059e-27	Up	M_WCS417_30m-M_Control	RNA	AT1G18330	RVE7	EARLY-PHYTOCHROME-RESPONSIVE1
BnaA02G0382100ZS	M_WCS417_30m	M_Control	584.83	132.122	358.476	2.14251	0.188366	11.3741	5.62542e-30	1.0254e-27	Up	M_WCS417_30m-M_Control	RNA	AT5G25160	ZFP3	Encodes a zinc finger protein containing only a single zinc finger.
Bnascaffold0335G0000100ZS	M_WCS417_30m	M_Control	126.744	576.723	351.734	-2.18455	0.19219	-11.3666	6.13383e-30	1.11407e-27	Down	M_WCS417_30m-M_Control	RNA	AT3G18710	PUB29	Encodes a protein containing a U-box and an ARM domain. This protein has E3 ubiquitin ligase activity based on in vitro assays.
BnaA03G0499400ZS	M_WCS417_30m	M_Control	92.4732	458.154	275.314	-2.30913	0.203537	-11.345	7.85029e-30	1.42073e-27	Down	M_WCS417_30m-M_Control	RNA	AT4G27657	--	--
BnaA04G0288700ZS	M_WCS417_30m	M_Control	208.028	763.846	485.937	-1.87665	0.165656	-11.3286	9.47283e-30	1.70828e-27	Down	M_WCS417_30m-M_Control	RNA	AT2G45760	BAP2	encodes a protein that is similar to BONZAI1-binding protein BAP1.
BnaC07G0495800ZS	M_WCS417_30m	M_Control	959.431	286.569	623	1.74136	0.153758	11.3253	9.83043e-30	1.76648e-27	Up	M_WCS417_30m-M_Control	RNA	AT5G48070	XTH20	putative xyloglucan endotransglycosylase/hydrolase, expressed primarily in the stele of mature non-elongating regions of both the main and the lateral root. Is expressed in lateral root primordia but expression ceases after lateral root begins to grow.
BnaC01G0457500ZS	M_WCS417_30m	M_Control	2954.3	1208.54	2081.42	1.28916	0.113921	11.3162	1.09045e-29	1.95256e-27	Up	M_WCS417_30m-M_Control	RNA	AT3G12580	HSP70-4	heat shock protein 70
BnaA05G0372100ZS	M_WCS417_30m	M_Control	126.212	577.238	351.725	-2.19181	0.194058	-11.2946	1.39571e-29	2.49036e-27	Down	M_WCS417_30m-M_Control	RNA	AT3G18710	PUB29	Encodes a protein containing a U-box and an ARM domain. This protein has E3 ubiquitin ligase activity based on in vitro assays.
BnaA09G0056000ZS	M_WCS417_30m	M_Control	838.825	254.642	546.734	1.71957	0.152499	11.2759	1.72525e-29	3.06756e-27	Up	M_WCS417_30m-M_Control	RNA	AT5G27380	GSHB	Encodes a protein with similarity to glutathione synthetases, which catalyzes one of the early steps in glutathione biosynthesis. Two transcripts have been detected; the longer transcript is less abundant and the protein is localized to the chloroplast. The smaller transcript, in which the transit peptide is truncated, is localized to the cytosol.
BnaA06G0356700ZS	M_WCS417_30m	M_Control	1169.94	390.027	779.986	1.58583	0.140673	11.2731	1.78109e-29	3.15577e-27	Up	M_WCS417_30m-M_Control	RNA	AT5G49450	bZIP1	Encodes a transcription activator is a positive regulator of plant tolerance to salt, osmotic and drought stresses.
BnaC04G0102000ZS	M_WCS417_30m	M_Control	1847.11	655.994	1251.55	1.49419	0.132662	11.2632	1.99479e-29	3.52209e-27	Up	M_WCS417_30m-M_Control	RNA	AT2G36320	--	A20/AN1-like zinc finger family protein
BnaC05G0066800ZS	M_WCS417_30m	M_Control	786.357	224.097	505.227	1.81211	0.16105	11.2518	2.26947e-29	3.99317e-27	Up	M_WCS417_30m-M_Control	RNA	AT1G08940	--	Phosphoglycerate mutase family protein
BnaA10G0150300ZS	M_WCS417_30m	M_Control	1094.03	2704.27	1899.15	-1.30582	0.116069	-11.2504	2.30648e-29	4.04423e-27	Down	M_WCS417_30m-M_Control	RNA	AT5G59550	RDUF2	Encodes an ABA- and drought-induced RING-DUF1117 gene whose mutation results in hyposensitive phenotypes toward ABA in terms of germination rate and stomatal closure and markedly reduced tolerance to drought stress relative to wild-type plants.
BnaA03G0503300ZS	M_WCS417_30m	M_Control	741.175	213.139	477.157	1.79852	0.160083	11.2349	2.74891e-29	4.80338e-27	Up	M_WCS417_30m-M_Control	RNA	AT4G28240	WIP1	Wound-responsive family protein
BnaC07G0547700ZS	M_WCS417_30m	M_Control	1223.23	427.516	825.371	1.51722	0.13537	11.208	3.72721e-29	6.49047e-27	Up	M_WCS417_30m-M_Control	RNA	AT4G38810	SCS-B	Calcium-binding EF-hand family protein
BnaA03G0079100ZS	M_WCS417_30m	M_Control	496.811	112.587	304.699	2.14187	0.191467	11.1866	4.74253e-29	8.23024e-27	Up	M_WCS417_30m-M_Control	RNA	AT5G18670	BMY3	putative beta-amylase BMY3 (BMY3)
Bnascaffold0027G0059900ZS	M_WCS417_30m	M_Control	118.614	544.932	331.773	-2.19846	0.196728	-11.1751	5.39722e-29	9.33443e-27	Down	M_WCS417_30m-M_Control	RNA	AT3G18710	PUB29	Encodes a protein containing a U-box and an ARM domain. This protein has E3 ubiquitin ligase activity based on in vitro assays.
BnaA01G0025400ZS	M_WCS417_30m	M_Control	771.119	227.741	499.43	1.759	0.157625	11.1594	6.44173e-29	1.1103e-26	Up	M_WCS417_30m-M_Control	RNA	AT4G36040	J11	Chaperone DnaJ-domain superfamily protein
BnaC01G0048800ZS	M_WCS417_30m	M_Control	666.186	183.359	424.773	1.86164	0.167029	11.1456	7.5197e-29	1.29171e-26	Up	M_WCS417_30m-M_Control	RNA	AT4G33770	ITPK2	Inositol 1,3,4-trisphosphate 5/6-kinase family protein
BnaC01G0032500ZS	M_WCS417_30m	M_Control	346.342	55.3915	200.867	2.6425	0.237377	11.1321	8.75741e-29	1.49923e-26	Up	M_WCS417_30m-M_Control	RNA	AT4G35770	SEN1	Senescence-associated gene that is strongly induced by phosphate starvation. Transcripts are differentially regulated at the level of mRNA stability at different times of day. mRNAs are targets of the mRNA degradation pathway mediated by the downstream (DST) instability determinant.
BnaA01G0068200ZS	M_WCS417_30m	M_Control	1552.19	572.638	1062.42	1.43789	0.129185	11.1305	8.91114e-29	1.52041e-26	Up	M_WCS417_30m-M_Control	RNA	AT4G30530	GGP1	Encodes a gamma-glutamyl peptidase, outside the GGT family, that can hydrolyze gamma-glutamyl peptide bonds.
BnaC08G0372300ZS	M_WCS417_30m	M_Control	1900.96	741.676	1321.32	1.35837	0.122239	11.1125	1.09112e-28	1.85541e-26	Up	M_WCS417_30m-M_Control	RNA	AT3G57330	ACA11	Lesion mimic phenotype when mutation in the gene is combined with a mutation in ACA4. Lesion mimic phenotype of double knockout can be suppressed by nutritional supplements that increase anion levels (e.g. 15 mM Nitrate, Chloride, or Phosphate)
BnaC08G0166900ZS	M_WCS417_30m	M_Control	426.024	84.0954	255.06	2.34317	0.210903	11.1102	1.11943e-28	1.89719e-26	Up	M_WCS417_30m-M_Control	RNA	AT4G25640	FFT	Encodes a multidrug and toxin efflux family transporter. Involved in flavonoid metabolism, affecting Root growth, seed development and germination, and pollen development, release and viability.
BnaC08G0446400ZS	M_WCS417_30m	M_Control	780.089	222.132	501.111	1.81099	0.163021	11.1089	1.13528e-28	1.91763e-26	Up	M_WCS417_30m-M_Control	RNA	AT2G22250	PAT	Encodes a prokaryotic-type plastidic aspartate aminotransferase with glutamate/aspartate-prephenate aminotransferase (PAT) activity.
BnaA01G0022100ZS	M_WCS417_30m	M_Control	90.2411	502.22	296.23	-2.47904	0.223449	-11.0944	1.335e-28	2.2475e-26	Down	M_WCS417_30m-M_Control	RNA	AT4G36550	PUB5	ARM repeat superfamily protein
BnaC03G0351200ZS	M_WCS417_30m	M_Control	1632.02	611.281	1121.65	1.41679	0.127762	11.0893	1.41319e-28	2.37126e-26	Up	M_WCS417_30m-M_Control	RNA	AT3G03780	MS2	Encodes a cytosolic methionine synthase, involved in methionine regeneration via the activated methyl cycle (or SAM cycle)
BnaC01G0134200ZS	M_WCS417_30m	M_Control	707.778	197.031	452.404	1.84297	0.16683	11.047	2.26748e-28	3.79216e-26	Up	M_WCS417_30m-M_Control	RNA	AT4G20780	CML42	Calcium sensor involved in trichome branching.
BnaA03G0220100ZS	M_WCS417_30m	M_Control	1314.13	461.596	887.862	1.5086	0.13659	11.0447	2.32482e-28	3.87527e-26	Up	M_WCS417_30m-M_Control	RNA	AT2G45300	--	encodes 3-phosphoshikimate 1-carboxyvinyltransferase / 5-enolpyruvylshikimate-3-phosphate / EPSP synthase involved in chorismate biosynthesis
BnaA08G0319800ZS	M_WCS417_30m	M_Control	4820.02	2096.38	3458.2	1.20128	0.10887	11.0341	2.61553e-28	4.34555e-26	Up	M_WCS417_30m-M_Control	RNA	AT1G03220	SAP2	Eukaryotic aspartyl protease family protein
BnaC03G0154100ZS	M_WCS417_30m	M_Control	304.291	35.7426	170.017	3.08314	0.279602	11.0269	2.83489e-28	4.69461e-26	Up	M_WCS417_30m-M_Control	RNA	AT5G53050	--	alpha/beta-Hydrolases superfamily protein
BnaC04G0119100ZS	M_WCS417_30m	M_Control	373.816	63.875	218.845	2.54431	0.230768	11.0254	2.88342e-28	4.75943e-26	Up	M_WCS417_30m-M_Control	RNA	AT2G34930	--	disease resistance family protein / LRR family protein
BnaC03G0600600ZS	M_WCS417_30m	M_Control	1311.1	3037.42	2174.26	-1.21201	0.110018	-11.0165	3.18094e-28	5.23346e-26	Down	M_WCS417_30m-M_Control	RNA	AT3G44260	CAF1a	Encodes one of the homologs of the yeast CCR4-associated factor 1: AT3G44260 (CAF1a), AT5G22250 (CAF1b). Has mRNA deadenylation activity. Also plays a role in plant defense responses.
BnaA09G0528000ZS	M_WCS417_30m	M_Control	2195.14	896.383	1545.76	1.29244	0.117487	11.0007	3.79097e-28	6.21694e-26	Up	M_WCS417_30m-M_Control	RNA	AT3G57330	ACA11	Lesion mimic phenotype when mutation in the gene is combined with a mutation in ACA4. Lesion mimic phenotype of double knockout can be suppressed by nutritional supplements that increase anion levels (e.g. 15 mM Nitrate, Chloride, or Phosphate)
BnaA05G0025700ZS	M_WCS417_30m	M_Control	765.932	1925.16	1345.55	-1.32989	0.120946	-10.9957	4.00622e-28	6.54874e-26	Down	M_WCS417_30m-M_Control	RNA	AT2G41640	GT61	Glycosyltransferase family 61 protein
BnaC03G0115400ZS	M_WCS417_30m	M_Control	289.093	984.558	636.826	-1.76688	0.160711	-10.9941	4.07879e-28	6.64593e-26	Down	M_WCS417_30m-M_Control	RNA	AT1G53540	HSP17.6C	HSP20-like chaperones superfamily protein
BnaC05G0214600ZS	M_WCS417_30m	M_Control	920.746	2222.24	1571.49	-1.27123	0.11619	-10.9409	7.3465e-28	1.19319e-25	Down	M_WCS417_30m-M_Control	RNA	AT1G27100	--	Actin cross-linking protein
BnaA10G0153200ZS	M_WCS417_30m	M_Control	667.307	1706.91	1187.11	-1.35477	0.123943	-10.9306	8.2332e-28	1.33294e-25	Down	M_WCS417_30m-M_Control	RNA	AT5G59820	ZAT12	Encodes a zinc finger protein involved in high light and cold acclimation. Overexpression of this putative transcription factor increases the expression level of 9 cold-responsive genes and represses the expression level of 15 cold-responsive genes, including CBF genes. Also, lines overexpressing this gene exhibits a small but reproducible increase in freeze tolerance. Because of the repression o…
BnaC02G0379200ZS	M_WCS417_30m	M_Control	1305.81	478.588	892.201	1.44855	0.132554	10.928	8.47241e-28	1.36706e-25	Up	M_WCS417_30m-M_Control	RNA	AT5G42650	DDE2	Encodes a member of the cytochrome p450 CYP74 gene family that functions as an allene oxide synthase. This enzyme catalyzes dehydration of the hydroperoxide to an unstable allene oxide in the JA biosynthetic pathway. It shows a dual catalytic activity, the major one being a 13-AOS but also expressing a 9-AOS activity.
BnaC09G0232800ZS	M_WCS417_30m	M_Control	346.469	1024.88	685.676	-1.56489	0.143204	-10.9277	8.49795e-28	1.36706e-25	Down	M_WCS417_30m-M_Control	RNA	AT5G45340	CYP707A3	Encodes a protein with ABA 8'-hydroxylase activity; involved in ABA catabolism. Mutant analyses show that disruption in the gene results in more drought tolerance whereas overexpression results in increased transpiration rate and reduced drought tolerance. Gene involved in postgermination growth. Plant P450 CYP707A3, ABA 8'-hydroxylase, binds enantioselectively (+)-ABA but not (-)-ABA, whereas th…
BnaC07G0493000ZS	M_WCS417_30m	M_Control	236.407	17.7414	127.074	3.72038	0.341336	10.8994	1.1596e-27	1.85955e-25	Up	M_WCS417_30m-M_Control	RNA	AT4G29930	--	basic helix-loop-helix (bHLH) DNA-binding superfamily protein
BnaC09G0267600ZS	M_WCS417_30m	M_Control	2194.9	903.936	1549.42	1.28005	0.117647	10.8805	1.42771e-27	2.28227e-25	Up	M_WCS417_30m-M_Control	RNA	AT3G25780	AOC3	Encodes allene oxide cyclase, one of the enzymes involved in jasmonic acid biosynthesis. One of four genes in Arabidopsis that encode this enzyme. mRNA expression is upregulated in senescing leaves. Note: Nomenclature for Arabidopsis allene oxide cyclase 3 (AOC3, AT3G25780) gene is based on Stenzel et al. 2003 Plant Molecular Biology 51:895-911. AOC3 (AT3G25780) is also referred to as AOC2 in He …
BnaC08G0373700ZS	M_WCS417_30m	M_Control	151.144	599.44	375.292	-1.9888	0.18287	-10.8755	1.50841e-27	2.40369e-25	Down	M_WCS417_30m-M_Control	RNA	AT3G57450	--	--
BnaC03G0315800ZS	M_WCS417_30m	M_Control	338.132	53.0313	195.582	2.6784	0.246304	10.8744	1.52685e-27	2.42545e-25	Up	M_WCS417_30m-M_Control	RNA	AT4G05070	WIP2	Wound-responsive family protein
BnaC07G0102200ZS	M_WCS417_30m	M_Control	1996.56	803.133	1399.85	1.31409	0.120933	10.8663	1.66808e-27	2.6415e-25	Up	M_WCS417_30m-M_Control	RNA	AT3G24500	MBF1C	One of three genes in A. thaliana encoding multiprotein bridging factor 1, a highly conserved transcriptional coactivator. May serve as a bridging factor between a bZIP factor and TBP. Its expression is specifically elevated in response to pathogen infection, salinity, drought, heat, hydrogen peroxide, and application of abscisic acid or salicylic acid. Constitutive expression enhances the tolera…
BnaC03G0333800ZS	M_WCS417_30m	M_Control	672.68	171.773	422.227	1.96609	0.180984	10.8633	1.72366e-27	2.72102e-25	Up	M_WCS417_30m-M_Control	RNA	AT4G01026	RCAR2	Encodes a member of the PYR (pyrabactin resistance )/PYL(PYR1-like)/RCAR (regulatory components of ABA receptor) family proteins with 14 members. PYR/PYL/RCAR family proteins function as abscisic acid sensors. Mediate ABA-dependent regulation of protein phosphatase 2Cs ABI1 and ABI2. PYL/RCAR family proteins function as abscisic acid sensors. Mediate ABA-dependent regulation of ABI1 and ABI2.
BnaA03G0292400ZS	M_WCS417_30m	M_Control	1796.65	692.101	1244.38	1.377	0.126938	10.8478	2.04269e-27	3.21464e-25	Up	M_WCS417_30m-M_Control	RNA	AT3G03780	MS2	Encodes a cytosolic methionine synthase, involved in methionine regeneration via the activated methyl cycle (or SAM cycle)
BnaC02G0047800ZS	M_WCS417_30m	M_Control	2726.31	1153.82	1940.06	1.24012	0.114573	10.8239	2.65241e-27	4.16124e-25	Up	M_WCS417_30m-M_Control	RNA	AT5G11670	NADP-ME2	The malic enzyme (EC 1.1.1.40) encoded by AtNADP-ME2 is presumably a cytosolic enzyme involved in malate metabolism and possibly assisting the oxidative pentose phosphate pathway. AtNADP-ME2 counts for the major part of NADP-ME activity in mature tissues of Arabidopsis.
BnaA09G0041200ZS	M_WCS417_30m	M_Control	238.162	827.268	532.715	-1.79668	0.165999	-10.8235	2.66539e-27	4.1687e-25	Down	M_WCS417_30m-M_Control	RNA	AT3G28340	GolS8	Encodes a protein with putative galacturonosyltransferase activity.
BnaC07G0216700ZS	M_WCS417_30m	M_Control	332.946	1004.35	668.648	-1.59351	0.147507	-10.803	3.33315e-27	5.19704e-25	Down	M_WCS417_30m-M_Control	RNA	AT5G66210	CPK28	member of Calcium Dependent Protein Kinase
BnaC02G0391100ZS	M_WCS417_30m	M_Control	62.5301	352.621	207.576	-2.49603	0.231318	-10.7905	3.81694e-27	5.93312e-25	Down	M_WCS417_30m-M_Control	RNA	AT5G44350	--	ethylene-responsive nuclear protein -related
BnaA07G0332800ZS	M_WCS417_30m	M_Control	722.954	213.805	468.379	1.75753	0.162965	10.7847	4.06518e-27	6.29966e-25	Up	M_WCS417_30m-M_Control	RNA	AT1G72416	--	Chaperone DnaJ-domain superfamily protein
BnaC05G0250500ZS	M_WCS417_30m	M_Control	287.504	876.776	582.14	-1.6085	0.14922	-10.7794	4.30656e-27	6.65337e-25	Down	M_WCS417_30m-M_Control	RNA	AT4G01360	BPS3	Encodes a protein related to BYPASS1 (BPS1). Regulates production of mobile compound: bps signal.
BnaC02G0544600ZS	M_WCS417_30m	M_Control	328.374	51.3786	189.876	2.67249	0.248002	10.7761	4.46469e-27	6.8767e-25	Up	M_WCS417_30m-M_Control	RNA	AT5G64750	ERF111	Encodes a putative transcription factor containing an AP2 domain. Is a member of the ERF (ethylene response factor) subfamily B-4 of ERF/AP2 transcription factor family. Expressed in response to ABA, osmotic stress, sugar stress and drought. Mutants are hypersensitive to these stresses. May be involved in regulation of ABA mediated stress response.
BnaC09G0429500ZS	M_WCS417_30m	M_Control	835.444	2028.46	1431.95	-1.27967	0.118776	-10.7738	4.57679e-27	7.028e-25	Down	M_WCS417_30m-M_Control	RNA	AT5G59550	RDUF2	Encodes an ABA- and drought-induced RING-DUF1117 gene whose mutation results in hyposensitive phenotypes toward ABA in terms of germination rate and stomatal closure and markedly reduced tolerance to drought stress relative to wild-type plants.
BnaC02G0067300ZS	M_WCS417_30m	M_Control	199.144	680.717	439.931	-1.77307	0.164704	-10.7652	5.02656e-27	7.69534e-25	Down	M_WCS417_30m-M_Control	RNA	AT5G15190	--	--
BnaC01G0329000ZS	M_WCS417_30m	M_Control	217.796	728.645	473.22	-1.74195	0.161833	-10.7639	5.09584e-27	7.77791e-25	Down	M_WCS417_30m-M_Control	RNA	AT1G59910	FORMIN7	Actin-binding FH2 (formin homology 2) family protein
BnaA04G0021900ZS	M_WCS417_30m	M_Control	790.683	241.64	516.162	1.71188	0.15936	10.7422	6.44766e-27	9.81168e-25	Up	M_WCS417_30m-M_Control	RNA	AT3G59220	PRN1	encodes a cupin-domain containing protein that is similar to pirins which interact with a CCAAT box binding transcription factor. The protein interacts with GPA1 (G protein alpha-subunit) in vitro. Mutants in the gene are affected in germination and early seedling development.
BnaC09G0528700ZS	M_WCS417_30m	M_Control	556.292	128.467	342.38	2.10994	0.196681	10.7277	7.54568e-27	1.14482e-24	Up	M_WCS417_30m-M_Control	RNA	AT5G13220	TIFY9	Encodes JAZ10, a member of the JASMONATE ZIM-domain (JAZ) proteins acting as repressors of jasmonate (JA) signaling. An alternatively spliced form (JAZ10.4) of JAZ10 lacks the Jas domain.
BnaA06G0098400ZS	M_WCS417_30m	M_Control	331.92	47.9322	189.926	2.78687	0.260141	10.7129	8.8511e-27	1.33887e-24	Up	M_WCS417_30m-M_Control	RNA	AT1G14860	NUDT18	nudix hydrolase homolog 18
BnaA09G0021100ZS	M_WCS417_30m	M_Control	2083.9	874.151	1479.02	1.25335	0.117046	10.7081	9.32097e-27	1.40575e-24	Up	M_WCS417_30m-M_Control	RNA	AT4G01700	--	Chitinase family protein
BnaA09G0101100ZS	M_WCS417_30m	M_Control	300.78	904.431	602.605	-1.58856	0.148429	-10.7025	9.90542e-27	1.48946e-24	Down	M_WCS417_30m-M_Control	RNA	AT5G66400	RAB18	Belongs to the dehydrin protein family, which contains highly conserved stretches of 7-17 residues that are repetitively scattered in their sequences, the K-, S-, Y- and lysine rich segments. ABA- and drought-induced glycine-rice dehydrin protein. The ABA-induced expression of RAB18 was reduced following ACC application, indicating that ethylene inhibits the ABA signaling pathway. RAB18 is also e…
BnaC03G0646100ZS	M_WCS417_30m	M_Control	1843.82	4137.14	2990.48	-1.1658	0.109	-10.6954	1.06921e-26	1.603e-24	Down	M_WCS417_30m-M_Control	RNA	AT1G27730	ZAT10	Related to Cys2/His2-type zinc-finger proteins found in higher plants. Compensated for a subset of calcineurin deficiency in yeast. Salt tolerance produced by ZAT10 appeared to be partially dependent on ENA1/PMR2, a P-type ATPase required for Li+ and Na+ efflux in yeast. The protein is localized to the nucleus, acts as a transcriptional repressor and is responsive to chitin oligomers. Also involv…
BnaA08G0276400ZS	M_WCS417_30m	M_Control	158.473	584.937	371.705	-1.88414	0.176239	-10.6908	1.12352e-26	1.67945e-24	Down	M_WCS417_30m-M_Control	RNA	AT1G12990	--	beta-1,4-N-acetylglucosaminyltransferase family protein
BnaA01G0013200ZS	M_WCS417_30m	M_Control	552.958	144.425	348.692	1.93771	0.18132	10.6867	1.17522e-26	1.75157e-24	Up	M_WCS417_30m-M_Control	RNA	AT4G37610	BT5	BTB and TAZ domain protein. Located in cytoplasm and expressed in fruit, flower and leaves.
BnaA09G0061000ZS	M_WCS417_30m	M_Control	2558.85	1087.62	1823.24	1.23389	0.11552	10.6812	1.24689e-26	1.85293e-24	Up	M_WCS417_30m-M_Control	RNA	AT5G26340	STP13	Encodes a protein with high affinity, hexose-specific/H+ symporter activity. The activity of the transporter appears to be negatively regulated by phosphorylation. Importantly, microarray analysis, as well as the study of the expression of this gene in mutants involved in programmed cell death (PCD) demonstrated a tight correlation between this gene's expression and PCD.
BnaC09G0087500ZS	M_WCS417_30m	M_Control	1788.99	3971.18	2880.08	-1.15055	0.10776	-10.6769	1.30524e-26	1.93397e-24	Down	M_WCS417_30m-M_Control	RNA	AT5G65300	SUPA	--
BnaC05G0438200ZS	M_WCS417_30m	M_Control	723.755	221.727	472.741	1.70684	0.160034	10.6655	1.47614e-26	2.18081e-24	Up	M_WCS417_30m-M_Control	RNA	AT3G16350	NID1	Homeodomain-like superfamily protein
BnaA03G0411500ZS	M_WCS417_30m	M_Control	977.909	2291.67	1634.79	-1.22866	0.115262	-10.6598	1.56991e-26	2.3126e-24	Down	M_WCS417_30m-M_Control	RNA	AT5G61600	ERF104	encodes a member of the ERF (ethylene response factor) subfamily B-3 of ERF/AP2 transcription factor family. The protein contains one AP2 domain. There are 18 members in this subfamily including ATERF-1, ATERF-2, AND ATERF-5.
BnaC09G0462600ZS	M_WCS417_30m	M_Control	1219.45	454.515	836.98	1.42411	0.133724	10.6496	1.75079e-26	2.57158e-24	Up	M_WCS417_30m-M_Control	RNA	AT5G20250	RS6	encodes a member of glycosyl hydrolase family 36. Expression is induced within 3 hours of dark treatment, in senescing leaves and treatment with exogenous photosynthesis inhibitor. Induction of gene expression was suppressed in excised leaves supplied with sugar. The authors suggest that the gene's expression pattern is responding to the level of sugar in the cell.
BnaC04G0449800ZS	M_WCS417_30m	M_Control	577.779	157.691	367.735	1.87279	0.175909	10.6464	1.8131e-26	2.65541e-24	Up	M_WCS417_30m-M_Control	RNA	AT2G23770	LYK4	protein kinase family protein / peptidoglycan-binding LysM domain-containing protein
BnaC02G0481700ZS	M_WCS417_30m	M_Control	676.834	198.216	437.525	1.77032	0.16638	10.6402	1.93649e-26	2.82795e-24	Up	M_WCS417_30m-M_Control	RNA	AT3G30775	PRODH	Encodes a proline oxidase that is predicted to localize to the inner mitochondrial membrane, its mRNA expression induced by high levels of Al and by osmotic stress. The promoter contains an L-proline-inducible element.
BnaA05G0314300ZS	M_WCS417_30m	M_Control	3277.72	1474.83	2376.27	1.15213	0.108294	10.6389	1.9649e-26	2.86119e-24	Up	M_WCS417_30m-M_Control	RNA	AT1G35580	NIN2	CINV1 / A/N-InvG is an alkaline/neutral invertase that breaks sucrose down into fructose and glucose (GH100). The exact localization of CINV1 remains under investigation but there is evidence that fluorescently-tagged CINV1 localizes to the cytoplasm. atinvg mutants have reduced root growth, reduced invertase activity, and increased expression of antioxidant genes under basal conditions. The leve…
BnaC02G0400200ZS	M_WCS417_30m	M_Control	1126.19	2601.23	1863.71	-1.20782	0.113563	-10.6357	2.03341e-26	2.95246e-24	Down	M_WCS417_30m-M_Control	RNA	AT5G45340	CYP707A3	Encodes a protein with ABA 8'-hydroxylase activity; involved in ABA catabolism. Mutant analyses show that disruption in the gene results in more drought tolerance whereas overexpression results in increased transpiration rate and reduced drought tolerance. Gene involved in postgermination growth. Plant P450 CYP707A3, ABA 8'-hydroxylase, binds enantioselectively (+)-ABA but not (-)-ABA, whereas th…
BnaC05G0090700ZS	M_WCS417_30m	M_Control	1010.16	347.075	678.618	1.54185	0.14521	10.6181	2.45568e-26	3.55541e-24	Up	M_WCS417_30m-M_Control	RNA	AT1G11260	STP1	Encodes a H+/hexose cotransporter.
BnaA04G0236600ZS	M_WCS417_30m	M_Control	1364.13	495.431	929.782	1.45997	0.137614	10.6092	2.70065e-26	3.89893e-24	Up	M_WCS417_30m-M_Control	RNA	AT2G36880	MAT3	methionine adenosyltransferase 3
BnaA03G0276800ZS	M_WCS417_30m	M_Control	450.122	97.2154	273.669	2.21553	0.209044	10.5984	3.03161e-26	4.36431e-24	Up	M_WCS417_30m-M_Control	RNA	AT4G01026	RCAR2	Encodes a member of the PYR (pyrabactin resistance )/PYL(PYR1-like)/RCAR (regulatory components of ABA receptor) family proteins with 14 members. PYR/PYL/RCAR family proteins function as abscisic acid sensors. Mediate ABA-dependent regulation of protein phosphatase 2Cs ABI1 and ABI2. PYL/RCAR family proteins function as abscisic acid sensors. Mediate ABA-dependent regulation of ABI1 and ABI2.
BnaC03G0116500ZS	M_WCS417_30m	M_Control	421.211	1150.33	785.77	-1.44965	0.136884	-10.5904	3.30218e-26	4.74035e-24	Down	M_WCS417_30m-M_Control	RNA	AT5G59590	UGT76E2	UDP-glucosyl transferase 76E2
BnaC06G0428100ZS	M_WCS417_30m	M_Control	3285.2	1435.25	2360.23	1.19438	0.112852	10.5836	3.55117e-26	5.08339e-24	Up	M_WCS417_30m-M_Control	RNA	AT1G76790	IGMT5	O-methyltransferase family protein
BnaC05G0449300ZS	M_WCS417_30m	M_Control	1961.83	788.564	1375.2	1.31473	0.124405	10.5681	4.18866e-26	5.97904e-24	Up	M_WCS417_30m-M_Control	RNA	AT3G16530	--	Lectin like protein whose expression is induced upon treatment with chitin oligomers.
BnaA03G0560200ZS	M_WCS417_30m	M_Control	577.709	155.066	366.387	1.89641	0.179769	10.5492	5.12453e-26	7.29439e-24	Up	M_WCS417_30m-M_Control	RNA	AT4G36990	TBF1	Encodes a protein whose sequence is similar to heat shock factors that regulate the expression of heat shock proteins. Transcript level is increased in response to heat shock. However, overexpression of this gene did not result in the increase of decrease of heat shock proteins.
BnaC03G0084200ZS	M_WCS417_30m	M_Control	408.8	1135.93	772.365	-1.47485	0.139944	-10.5389	5.71815e-26	8.11657e-24	Down	M_WCS417_30m-M_Control	RNA	AT3G03280	--	--
Bnascaffold1706G0000100ZS	M_WCS417_30m	M_Control	492.316	118.658	305.487	2.05378	0.195053	10.5294	6.32681e-26	8.95545e-24	Up	M_WCS417_30m-M_Control	RNA	AT1G70770	--	Protein of unknown function DUF2359, transmembrane
BnaC08G0528500ZS	M_WCS417_30m	M_Control	6172.65	2888.3	4530.48	1.0955	0.104056	10.5281	6.41428e-26	9.05397e-24	Up	M_WCS417_30m-M_Control	RNA	AT1G08930	ERD6	encodes a putative sucrose transporter whose gene expression is induced by dehydration and cold.
BnaA07G0277400ZS	M_WCS417_30m	M_Control	352.44	998.657	675.549	-1.50263	0.143414	-10.4776	1.09518e-25	1.54159e-23	Down	M_WCS417_30m-M_Control	RNA	AT1G67920	--	--
BnaC06G0152000ZS	M_WCS417_30m	M_Control	892.765	299.382	596.074	1.57537	0.150489	10.4683	1.20765e-25	1.6952e-23	Up	M_WCS417_30m-M_Control	RNA	AT5G36220	CYP91A1	member of CYP81D family of cytochrome p450s. This gene was originally called CYP91A1, but was later renamed to CYP81D1.
BnaA07G0067900ZS	M_WCS417_30m	M_Control	1362.62	499.738	931.181	1.44807	0.138355	10.4663	1.23333e-25	1.72646e-23	Up	M_WCS417_30m-M_Control	RNA	AT3G24500	MBF1C	One of three genes in A. thaliana encoding multiprotein bridging factor 1, a highly conserved transcriptional coactivator. May serve as a bridging factor between a bZIP factor and TBP. Its expression is specifically elevated in response to pathogen infection, salinity, drought, heat, hydrogen peroxide, and application of abscisic acid or salicylic acid. Constitutive expression enhances the tolera…
BnaA05G0371400ZS	M_WCS417_30m	M_Control	276.65	38.7782	157.714	2.83085	0.271066	10.4434	1.57109e-25	2.19321e-23	Up	M_WCS417_30m-M_Control	RNA	AT3G18773	ATL77	RING/U-box superfamily protein
BnaC03G0158800ZS	M_WCS417_30m	M_Control	409.508	1147.36	778.434	-1.48596	0.142499	-10.4278	1.85039e-25	2.57601e-23	Down	M_WCS417_30m-M_Control	RNA	AT5G52050	DTX50	MATE efflux family protein
BnaC03G0341700ZS	M_WCS417_30m	M_Control	3858.41	1670.75	2764.58	1.20797	0.115949	10.4181	2.04929e-25	2.84508e-23	Up	M_WCS417_30m-M_Control	RNA	AT3G01290	HIR2	SPFH/Band 7/PHB domain-containing membrane-associated protein family
BnaA05G0474400ZS	M_WCS417_30m	M_Control	217.812	713.543	465.678	-1.7112	0.164369	-10.4107	2.21539e-25	3.06728e-23	Down	M_WCS417_30m-M_Control	RNA	AT3G05490	RALFL22	Member of a diversely expressed predicted peptide family showing sequence similarity to tobacco Rapid Alkalinization Factor (RALF), and is believed to play an essential role in the physiology of Arabidopsis. Consists of a single exon and is characterized by a conserved C-terminal motif and N-terminal signal peptide.
BnaA09G0529100ZS	M_WCS417_30m	M_Control	391.236	1064.5	727.867	-1.44418	0.138985	-10.3909	2.72728e-25	3.76573e-23	Down	M_WCS417_30m-M_Control	RNA	AT3G57450	--	--
BnaC05G0177400ZS	M_WCS417_30m	M_Control	735.426	232.368	483.897	1.66109	0.160028	10.38	3.05783e-25	4.21066e-23	Up	M_WCS417_30m-M_Control	RNA	AT1G20840	TMT1	The protein encoded by this gene is found in the tonoplast (vacuole membrane) of Arabidopsis cells. The gene is expressed at highest levels in juvenile (sink) and adult (source) leaves, followed by flower tissues.
BnaC04G0174600ZS	M_WCS417_30m	M_Control	10329.7	4993.96	7661.82	1.04846	0.101144	10.3661	3.53818e-25	4.85891e-23	Up	M_WCS417_30m-M_Control	RNA	AT2G30490	REF3	Encodes a cinnamate-4-hydroxylase. Mutations in this gene impact phenylpropanoid metabolism, growth and development.
BnaC04G0487700ZS	M_WCS417_30m	M_Control	599.996	1493.48	1046.74	-1.31581	0.12701	-10.3599	3.77267e-25	5.16692e-23	Down	M_WCS417_30m-M_Control	RNA	AT2G28780	--	--
BnaC07G0259200ZS	M_WCS417_30m	M_Control	2073.11	892.781	1482.95	1.21569	0.117823	10.3179	5.84637e-25	7.98542e-23	Up	M_WCS417_30m-M_Control	RNA	AT5G47450	TIP2;3	Tonoplast intrinsic protein, transports ammonium (NH3) and methylammonium across the tonoplast membrane, gene expression shows diurnal regulation and is upregulated by ammonium (NH3).
BnaC07G0195900ZS	M_WCS417_30m	M_Control	104.011	445.158	274.585	-2.09643	0.20353	-10.3003	7.02127e-25	9.56441e-23	Down	M_WCS417_30m-M_Control	RNA	AT1G20310	--	--
BnaC08G0104600ZS	M_WCS417_30m	M_Control	298.215	864.883	581.549	-1.53632	0.149215	-10.296	7.34426e-25	9.97757e-23	Down	M_WCS417_30m-M_Control	RNA	AT1G32640	ZBF1	Encodes a MYC-related transcriptional activator with a typical DNA binding domain of a basic helix-loop-helix leucine zipper motif. Binds to an extended G-Box promoter motif and interacts with Jasmonate ZIM-domain proteins. Its transcription is induced by dehydration stress and ABA treatment. Negative regulator of blue light鈥搈ediated photomorphogenic growth and blue and far-red-light鈥搑egulated ge…
BnaA02G0103300ZS	M_WCS417_30m	M_Control	127.577	497.831	312.704	-1.964	0.190767	-10.2953	7.40037e-25	1.00269e-22	Down	M_WCS417_30m-M_Control	RNA	AT1G53540	HSP17.6C	HSP20-like chaperones superfamily protein
BnaA08G0140900ZS	M_WCS417_30m	M_Control	177.49	625.752	401.621	-1.81776	0.176752	-10.2843	8.29855e-25	1.11841e-22	Down	M_WCS417_30m-M_Control	RNA	AT4G33560	WIP5	Wound-responsive family protein
BnaC04G0568100ZS	M_WCS417_30m	M_Control	888.38	310.501	599.441	1.51668	0.147503	10.2824	8.45898e-25	1.137e-22	Up	M_WCS417_30m-M_Control	RNA	AT2G39518	CASPL4D2	Uncharacterised protein family (UPF0497)
BnaA01G0085500ZS	M_WCS417_30m	M_Control	310.206	895.344	602.775	-1.52888	0.148812	-10.2739	9.23738e-25	1.23745e-22	Down	M_WCS417_30m-M_Control	RNA	AT4G28460	prePIP1	--
BnaA05G0080300ZS	M_WCS417_30m	M_Control	239.266	28.5431	133.905	3.06133	0.297977	10.2737	9.25511e-25	1.23745e-22	Up	M_WCS417_30m-M_Control	RNA	AT2G37280	PDR5	Encodes an ATP-binding cassette (ABC) transporter. Expressed in the vascular tissue of primary stem.
BnaA03G0415700ZS	M_WCS417_30m	M_Control	696.057	191.932	443.994	1.85522	0.180678	10.2681	9.81462e-25	1.3088e-22	Up	M_WCS417_30m-M_Control	RNA	AT3G50440	MES10	Encodes a protein shown to have methyl jasmonate esterase activity in vitro. This protein does not act on methyl IAA, MeSA, MeGA4, or MEGA9 in vitro.
BnaC02G0377600ZS	M_WCS417_30m	M_Control	1721.7	702.603	1212.15	1.29233	0.125887	10.2658	1.00487e-24	1.3365e-22	Up	M_WCS417_30m-M_Control	RNA	AT5G42830	--	HXXXD-type acyl-transferase family protein
BnaC09G0049500ZS	M_WCS417_30m	M_Control	2803.18	1247.01	2025.09	1.16821	0.113855	10.2605	1.06147e-24	1.40809e-22	Up	M_WCS417_30m-M_Control	RNA	AT5G26340	STP13	Encodes a protein with high affinity, hexose-specific/H+ symporter activity. The activity of the transporter appears to be negatively regulated by phosphorylation. Importantly, microarray analysis, as well as the study of the expression of this gene in mutants involved in programmed cell death (PCD) demonstrated a tight correlation between this gene's expression and PCD.
BnaA06G0085600ZS	M_WCS417_30m	M_Control	1353.86	538.601	946.23	1.32958	0.129658	10.2545	1.12944e-24	1.49434e-22	Up	M_WCS417_30m-M_Control	RNA	AT1G11960	OSCA1.3	ERD (early-responsive to dehydration stress) family protein
BnaC02G0317600ZS	M_WCS417_30m	M_Control	528.683	143.391	336.037	1.88107	0.183867	10.2306	1.44638e-24	1.9087e-22	Up	M_WCS417_30m-M_Control	RNA	--	--	--
BnaA02G0084600ZS	M_WCS417_30m	M_Control	777.549	260.406	518.978	1.57848	0.154522	10.2152	1.69549e-24	2.23162e-22	Up	M_WCS417_30m-M_Control	RNA	AT5G20250	RS6	encodes a member of glycosyl hydrolase family 36. Expression is induced within 3 hours of dark treatment, in senescing leaves and treatment with exogenous photosynthesis inhibitor. Induction of gene expression was suppressed in excised leaves supplied with sugar. The authors suggest that the gene's expression pattern is responding to the level of sugar in the cell.
BnaA02G0088900ZS	M_WCS417_30m	M_Control	866.249	286.329	576.289	1.59734	0.156529	10.2048	1.88741e-24	2.47778e-22	Up	M_WCS417_30m-M_Control	RNA	AT5G21940	--	--
BnaC02G0125300ZS	M_WCS417_30m	M_Control	50.6756	307.616	179.146	-2.6001	0.254813	-10.204	1.9034e-24	2.49232e-22	Down	M_WCS417_30m-M_Control	RNA	AT1G53540	HSP17.6C	HSP20-like chaperones superfamily protein
BnaC04G0327600ZS	M_WCS417_30m	M_Control	1327.11	504.896	916.002	1.39311	0.136681	10.1924	2.14408e-24	2.80023e-22	Up	M_WCS417_30m-M_Control	RNA	AT3G54140	PTR1	Encodes a di- and tri-peptide transporter that recognizes a variety of different amino acid combinations. GFP-tagged PTR1 localizes to the plasma membrane and has 8 to 11 predicted transmembrane domains. PTR1 is expressed in a number of different vascular tissues throughout the plant based on promoter:GUS expression analysis. ptr1 mutants have a lower dry weight than wild type plants when both ar…
BnaC05G0167300ZS	M_WCS417_30m	M_Control	704.111	1712.9	1208.51	-1.28244	0.125877	-10.1881	2.24112e-24	2.91944e-22	Down	M_WCS417_30m-M_Control	RNA	AT1G19770	PUP14	Member of a family of proteins related to PUP1, a purine transporter. May be involved in the transport of purine and purine derivatives such as cytokinins, across the plasma membrane.
BnaA10G0273300ZS	M_WCS417_30m	M_Control	1077.14	404.769	740.954	1.41149	0.13857	10.1861	2.28738e-24	2.97207e-22	Up	M_WCS417_30m-M_Control	RNA	AT5G05730	WEI2	ASA1 encodes the alpha subunit of anthranilate synthase, which catalyzes the rate-limiting step of tryptophan synthesis. ASA1 is induced by ethylene, and forms a link between ethylene signalling and auxin synthesis in roots.
BnaC03G0782400ZS	M_WCS417_30m	M_Control	501.821	133.161	317.491	1.91443	0.187986	10.1839	2.33983e-24	3.03244e-22	Up	M_WCS417_30m-M_Control	RNA	AT1G50420	SCL3	Encodes a scarecrow-like protein (SCL3) Putative transcription factors interacting with the gene product of VHA-B1 (vacuolar ATPase subunit B1; as shown through yeast two-hybrid assay).
BnaA08G0213700ZS	M_WCS417_30m	M_Control	469.512	1223.25	846.382	-1.38122	0.135722	-10.1769	2.51562e-24	3.25196e-22	Down	M_WCS417_30m-M_Control	RNA	AT1G28370	ERF11	encodes a member of the ERF (ethylene response factor) subfamily B-1 of ERF/AP2 transcription factor family. The protein contains one AP2 domain. There are 15 members in this subfamily including ATERF-3, ATERF-4, ATERF-7, and leafy petiole.
BnaC03G0003300ZS	M_WCS417_30m	M_Control	679.209	1641.86	1160.53	-1.2736	0.125233	-10.1699	2.70239e-24	3.4845e-22	Down	M_WCS417_30m-M_Control	RNA	AT5G01710	--	methyltransferases
BnaC03G0482200ZS	M_WCS417_30m	M_Control	1533.59	628.908	1081.25	1.28553	0.12646	10.1655	2.8272e-24	3.63618e-22	Up	M_WCS417_30m-M_Control	RNA	AT2G06050	OPR3	Encodes a 12-oxophytodienoate reductase that is required for jasmonate biosynthesis. Mutants are male sterile and defective in pollen dehiscence. Shows activity towards 2,4,6-trinitrotoluene.
BnaC01G0114800ZS	M_WCS417_30m	M_Control	621.007	1547.08	1084.04	-1.31644	0.129594	-10.1582	3.04746e-24	3.90954e-22	Down	M_WCS417_30m-M_Control	RNA	AT4G18422	--	--
BnaA09G0664000ZS	M_WCS417_30m	M_Control	4818.19	2310.05	3564.12	1.06055	0.10446	10.1527	3.22358e-24	4.12504e-22	Up	M_WCS417_30m-M_Control	RNA	AT1G08930	ERD6	encodes a putative sucrose transporter whose gene expression is induced by dehydration and cold.
BnaA03G0019600ZS	M_WCS417_30m	M_Control	48.2535	292.25	170.252	-2.59767	0.255953	-10.149	3.34819e-24	4.27371e-22	Down	M_WCS417_30m-M_Control	RNA	AT5G05410	DREB2A	Encodes a transcription factor that specifically binds to DRE/CRT cis elements (responsive to drought and low-temperature stress). Belongs to the DREB subfamily A-2 of ERF/AP2 transcription factor family (DREB2A). There are eight members in this subfamily including DREB2B. The protein contains one AP2 domain. Overexpression of transcriptional activation domain of DREB2A resulted in significant dr…
BnaC09G0446200ZS	M_WCS417_30m	M_Control	2235.86	986.945	1611.4	1.17981	0.116379	10.1376	3.7623e-24	4.79022e-22	Up	M_WCS417_30m-M_Control	RNA	AT5G22630	ADT5	Encodes a plastid-localized arogenate dehydratase involved in phenylalanine biosynthesis. Not less than six genes encoding ADT were identi&#64257;ed in the Arabidopsis genome: ADT1 [At1g11790]; ADT2 [At3g07630]; ADT3 [At2g27820]; ADT4 [At3g44720]; ADT5 [At5g22630]; and ADT6 [At1g08250].
BnaC06G0374800ZS	M_WCS417_30m	M_Control	1099.27	2590.52	1844.89	-1.2369	0.122223	-10.12	4.50461e-24	5.72097e-22	Down	M_WCS417_30m-M_Control	RNA	AT1G70780	--	--
BnaA06G0190900ZS	M_WCS417_30m	M_Control	1786.38	3848.82	2817.6	-1.10753	0.109622	-10.1031	5.3502e-24	6.7779e-22	Down	M_WCS417_30m-M_Control	RNA	AT3G44260	CAF1a	Encodes one of the homologs of the yeast CCR4-associated factor 1: AT3G44260 (CAF1a), AT5G22250 (CAF1b). Has mRNA deadenylation activity. Also plays a role in plant defense responses.
BnaA08G0105200ZS	M_WCS417_30m	M_Control	289.933	854.19	572.061	-1.55939	0.154353	-10.1027	5.37244e-24	6.78911e-22	Down	M_WCS417_30m-M_Control	RNA	AT4G17490	ERF6	Encodes a member of the ERF (ethylene response factor) subfamily B-3 of ERF/AP2 transcription factor family (ATERF-6). The protein contains one AP2 domain. There are 18 members in this subfamily including ATERF-1, ATERF-2, AND ATERF-5. It is involved in the response to reactive oxygen species and light stress.
BnaA03G0536800ZS	M_WCS417_30m	M_Control	910.67	327.572	619.121	1.47477	0.146091	10.0949	5.81998e-24	7.33636e-22	Up	M_WCS417_30m-M_Control	RNA	AT4G33420	Prx47	Peroxidase superfamily protein
BnaA02G0104900ZS	M_WCS417_30m	M_Control	462.072	1203.09	832.581	-1.38101	0.136874	-10.0896	6.13883e-24	7.71908e-22	Down	M_WCS417_30m-M_Control	RNA	AT5G59550	RDUF2	Encodes an ABA- and drought-induced RING-DUF1117 gene whose mutation results in hyposensitive phenotypes toward ABA in terms of germination rate and stomatal closure and markedly reduced tolerance to drought stress relative to wild-type plants.
BnaA02G0279100ZS	M_WCS417_30m	M_Control	746.859	241.895	494.377	1.62757	0.161348	10.0873	6.28845e-24	7.88765e-22	Up	M_WCS417_30m-M_Control	RNA	AT5G42650	DDE2	Encodes a member of the cytochrome p450 CYP74 gene family that functions as an allene oxide synthase. This enzyme catalyzes dehydration of the hydroperoxide to an unstable allene oxide in the JA biosynthetic pathway. It shows a dual catalytic activity, the major one being a 13-AOS but also expressing a 9-AOS activity.
BnaA08G0115900ZS	M_WCS417_30m	M_Control	114.349	449.473	281.911	-1.97487	0.195938	-10.079	6.83955e-24	8.55772e-22	Down	M_WCS417_30m-M_Control	RNA	AT4G19810	ChiC	ChiC encodes a Class V chitinase that is a part of glycoside hydrolase family 18 based on CAZy groupings. It appears to primarily act as an exochitinase in vitro where it predominantly cleaves a chitobiose (GlcNAc)2 residue from the non-reducing end of a chitin oligosaccharide. However, it shows some minor endochitinase activity in vitro, as well. A putative 24 amino-acid signal peptide may direc…
BnaC04G0607200ZS	M_WCS417_30m	M_Control	465.668	1199.99	832.827	-1.36574	0.13553	-10.077	6.98214e-24	8.71461e-22	Down	M_WCS417_30m-M_Control	RNA	AT2G45760	BAP2	encodes a protein that is similar to BONZAI1-binding protein BAP1.
BnaC07G0363400ZS	M_WCS417_30m	M_Control	1082.71	2412.87	1747.79	-1.15599	0.114779	-10.0714	7.39051e-24	9.20164e-22	Down	M_WCS417_30m-M_Control	RNA	AT5G24660	LSU2	response to low sulfur 2
BnaA01G0093600ZS	M_WCS417_30m	M_Control	692.27	1643.12	1167.7	-1.24714	0.123857	-10.0692	7.55941e-24	9.38886e-22	Down	M_WCS417_30m-M_Control	RNA	AT4G18422	--	--
BnaC05G0183300ZS	M_WCS417_30m	M_Control	332.161	927.093	629.627	-1.48039	0.147059	-10.0667	7.75728e-24	9.61107e-22	Down	M_WCS417_30m-M_Control	RNA	AT1G21326	--	VQ motif-containing protein
BnaA05G0183300ZS	M_WCS417_30m	M_Control	389.052	1055.56	722.304	-1.44029	0.143105	-10.0646	7.92122e-24	9.79025e-22	Down	M_WCS417_30m-M_Control	RNA	AT1G48750	--	Bifunctional inhibitor/lipid-transfer protein/seed storage 2S albumin superfamily protein
BnaA09G0628800ZS	M_WCS417_30m	M_Control	230.857	28.699	129.778	3.00631	0.299499	10.0378	1.03974e-23	1.28195e-21	Up	M_WCS417_30m-M_Control	RNA	AT1G15100	RHA2A	Encodes a putative RING-H2 finger protein RHA2a.
BnaA04G0034000ZS	M_WCS417_30m	M_Control	7425.24	3720.96	5573.1	0.996781	0.0994129	10.0267	1.16365e-23	1.43124e-21	Normal	M_WCS417_30m-M_Control	RNA	AT2G27030	CAM5	encodes a calmodulin that has higher affinity to kinesin-like calmodulin binding motor protein than CAM4 or CAM6.
BnaC02G0100500ZS	M_WCS417_30m	M_Control	767.338	262.563	514.951	1.54706	0.154361	10.0223	1.21598e-23	1.49198e-21	Up	M_WCS417_30m-M_Control	RNA	AT5G20250	RS6	encodes a member of glycosyl hydrolase family 36. Expression is induced within 3 hours of dark treatment, in senescing leaves and treatment with exogenous photosynthesis inhibitor. Induction of gene expression was suppressed in excised leaves supplied with sugar. The authors suggest that the gene's expression pattern is responding to the level of sugar in the cell.
BnaC03G0024500ZS	M_WCS417_30m	M_Control	1183.92	458.253	821.087	1.36849	0.136652	10.0144	1.31725e-23	1.61233e-21	Up	M_WCS417_30m-M_Control	RNA	AT5G05440	RCAR8	Encodes a member of the PYR (pyrabactin resistance )/PYL(PYR1-like)/RCAR (regulatory components of ABA receptor) family proteins with 14 members. PYR/PYL/RCAR family proteins function as abscisic acid sensors. Mediate ABA-dependent regulation of protein phosphatase 2Cs ABI1 and ABI2.
BnaA06G0013300ZS	M_WCS417_30m	M_Control	3259.59	1532.65	2396.12	1.08867	0.108728	10.0128	1.3395e-23	1.63561e-21	Up	M_WCS417_30m-M_Control	RNA	AT1G53210	NCL	Encodes a Na+/Ca 2+ exchanger-like protein that participates in the maintenance of Ca 2+ homeostasis.
BnaA04G0282900ZS	M_WCS417_30m	M_Control	312.682	57.351	185.017	2.45079	0.245012	10.0027	1.4825e-23	1.80587e-21	Up	M_WCS417_30m-M_Control	RNA	AT2G44670	--	Protein of unknown function (DUF581)
BnaA07G0085000ZS	M_WCS417_30m	M_Control	282.049	809.492	545.77	-1.52136	0.152175	-9.99743	1.56404e-23	1.90063e-21	Down	M_WCS417_30m-M_Control	RNA	AT1G30370	DLAH	Encodes a mitochondria-localized class III phospholipase A1 that plays a role in seed viability.
BnaC05G0465400ZS	M_WCS417_30m	M_Control	1362.18	550.291	956.236	1.30832	0.131154	9.97541	1.95289e-23	2.36183e-21	Up	M_WCS417_30m-M_Control	RNA	AT3G13790	CWI1	Encodes a protein with invertase activity.
BnaA07G0210000ZS	M_WCS417_30m	M_Control	20.4223	215.806	118.114	-3.40648	0.341587	-9.97251	2.01076e-23	2.42603e-21	Down	M_WCS417_30m-M_Control	RNA	AT3G59900	ARGOS	Encodes ARGOS (Auxin-Regulated Gene Involved in Organ Size). Inducible by auxin. Involved in lateral organ size control. Transgenic plants expressing sense or antisense ARGOS cDNA display enlarged or reduced aerial organs, respectively. The alteration in organ size is attributable mainly to changes in cell number and the duration of organ growth.
BnaC09G0004500ZS	M_WCS417_30m	M_Control	1853.75	789.333	1321.54	1.23151	0.12356	9.96689	2.12784e-23	2.5612e-21	Up	M_WCS417_30m-M_Control	RNA	AT4G01700	--	Chitinase family protein
BnaA03G0539200ZS	M_WCS417_30m	M_Control	371.466	78.3878	224.927	2.24813	0.225593	9.96541	2.15976e-23	2.59345e-21	Up	M_WCS417_30m-M_Control	RNA	AT4G33770	ITPK2	Inositol 1,3,4-trisphosphate 5/6-kinase family protein
BnaC09G0138900ZS	M_WCS417_30m	M_Control	155.273	574.588	364.93	-1.88922	0.189604	-9.96405	2.18947e-23	2.62292e-21	Down	M_WCS417_30m-M_Control	RNA	AT1G63090	PP2-A11	phloem protein 2-A11
BnaC03G0171900ZS	M_WCS417_30m	M_Control	5394.82	2619.38	4007.1	1.04219	0.104957	9.92973	3.09101e-23	3.69419e-21	Up	M_WCS417_30m-M_Control	RNA	AT2G30490	REF3	Encodes a cinnamate-4-hydroxylase. Mutations in this gene impact phenylpropanoid metabolism, growth and development.
BnaA05G0442100ZS	M_WCS417_30m	M_Control	1372.77	563.801	968.284	1.28366	0.129287	9.92876	3.1212e-23	3.7215e-21	Up	M_WCS417_30m-M_Control	RNA	AT3G09350	Fes1A	Encodes one of the Arabidopsis orthologs of the human Hsp70-binding protein 1 (HspBP-1) and yeast Fes1p: Fes1A (AT3G09350), Fes1B (AT3G53800), Fes1C (AT5G02150). Fes1A is cytosolic and associates with cytosolic Hsp70. Mutants showed increased heat-sensitive phenotype suggestion the involvement of Fes1A in acquired thermotolerance. Does not have nucleotide exchange factor activity in vitro.
BnaA02G0187600ZS	M_WCS417_30m	M_Control	2402.4	1019.66	1711.03	1.23558	0.124464	9.92726	3.16849e-23	3.76902e-21	Up	M_WCS417_30m-M_Control	RNA	AT1G70410	CA4	Encodes a putative beta-carbonic anhydrase betaCA4. Together with betaCA1 (At3g01500) regulates CO2-controlled stomatal movements in guard cells.
BnaA01G0085800ZS	M_WCS417_30m	M_Control	611.205	172.605	391.905	1.82295	0.183765	9.92	3.40746e-23	4.04379e-21	Up	M_WCS417_30m-M_Control	RNA	AT4G28420	--	Tyrosine transaminase family protein
Bnascaffold0418G0000200ZS	M_WCS417_30m	M_Control	2256.33	4709.78	3483.06	-1.06162	0.107041	-9.91786	3.48135e-23	4.12182e-21	Down	M_WCS417_30m-M_Control	RNA	AT3G45640	MPK3	Encodes a mitogen-activated kinase whose mRNA levels increase in response to touch, cold, salinity stress and chitin oligomers.Also functions in ovule development. Heterozygous MPK3 mutants in a homozygous MPK6 background are female sterile due to defects in integument development. MPK3 can be dephosphorylated by MKP2 in vitro.
BnaC06G0377300ZS	M_WCS417_30m	M_Control	194.784	638.092	416.438	-1.71188	0.172667	-9.91434	3.60631e-23	4.25982e-21	Down	M_WCS417_30m-M_Control	RNA	AT1G71000	--	Chaperone DnaJ-domain superfamily protein
BnaA07G0315200ZS	M_WCS417_30m	M_Control	305.767	55.0377	180.402	2.47985	0.250229	9.9103	3.75513e-23	4.42529e-21	Up	M_WCS417_30m-M_Control	RNA	AT1G33600	--	Leucine-rich repeat (LRR) family protein
BnaA03G0038700ZS	M_WCS417_30m	M_Control	221.051	673.768	447.409	-1.60799	0.162303	-9.90737	3.86678e-23	4.54629e-21	Down	M_WCS417_30m-M_Control	RNA	AT5G10100	TPPI	Haloacid dehalogenase-like hydrolase (HAD) superfamily protein
BnaA10G0298400ZS	M_WCS417_30m	M_Control	603.599	183.001	393.3	1.72231	0.173956	9.90083	4.12839e-23	4.84264e-21	Up	M_WCS417_30m-M_Control	RNA	AT5G02230	--	Haloacid dehalogenase-like hydrolase (HAD) superfamily protein
BnaA03G0023700ZS	M_WCS417_30m	M_Control	3111.34	6277.68	4694.51	-1.01268	0.102355	-9.89385	4.42647e-23	5.1803e-21	Down	M_WCS417_30m-M_Control	RNA	AT5G06320	NHL3	encodes a protein whose sequence is similar to tobacco hairpin-induced gene (HIN1) and Arabidopsis non-race specific disease resistance gene (NDR1). Expression of this gene is induced by cucumber mosaic virus, spermine and Pseudomonas syringae pv. tomato DC3000. The gene product is localized to the plasma membrane.
BnaA03G0286300ZS	M_WCS417_30m	M_Control	302.885	51.2227	177.054	2.55852	0.258714	9.88935	4.6301e-23	5.40612e-21	Up	M_WCS417_30m-M_Control	RNA	AT3G02140	TMAC2	Encodes a protein that acts in the nucleus and is an important negative regulator of ABA and salt stress responses, and could play a critical role in controlling root elongation, floral initiation and starch degradation.
BnaC03G0039400ZS	M_WCS417_30m	M_Control	468.933	128.119	298.526	1.87179	0.189497	9.87766	5.20343e-23	6.06158e-21	Up	M_WCS417_30m-M_Control	RNA	AT5G08350	--	GRAM domain-containing protein / ABA-responsive protein-related
BnaC08G0358700ZS	M_WCS417_30m	M_Control	1988.27	4113.08	3050.68	-1.04864	0.10618	-9.87612	5.28402e-23	6.14133e-21	Down	M_WCS417_30m-M_Control	RNA	AT3G55980	TZF11	salt-inducible zinc finger 1
BnaC04G0515200ZS	M_WCS417_30m	M_Control	569.138	1431.4	1000.27	-1.33109	0.134982	-9.86128	6.12609e-23	7.10374e-21	Down	M_WCS417_30m-M_Control	RNA	AT2G31880	SOBIR1	Encodes a putative leucine rich repeat transmembrane protein that is expressed in response to Pseudomonas syringae. Expression of SRRLK may be required for silencing via lsiRNAs. Regulates cell death and innate immunity.
BnaC05G0327100ZS	M_WCS417_30m	M_Control	3003.46	1392.39	2197.93	1.10905	0.11252	9.8565	6.42524e-23	7.43362e-21	Up	M_WCS417_30m-M_Control	RNA	AT1G35580	NIN2	CINV1 / A/N-InvG is an alkaline/neutral invertase that breaks sucrose down into fructose and glucose (GH100). The exact localization of CINV1 remains under investigation but there is evidence that fluorescently-tagged CINV1 localizes to the cytoplasm. atinvg mutants have reduced root growth, reduced invertase activity, and increased expression of antioxidant genes under basal conditions. The leve…
BnaC03G0624300ZS	M_WCS417_30m	M_Control	812.948	285.701	549.324	1.50753	0.153131	9.84471	7.22458e-23	8.33937e-21	Up	M_WCS417_30m-M_Control	RNA	AT3G47960	NPF2.10	Encodes a high-affinity, proton-dependent glucosinolate-specific transporter that is crucial for the transport of both methionine- and tryptophan-derived glucosinolates to seeds.
BnaA05G0061400ZS	M_WCS417_30m	M_Control	773.373	1785.68	1279.52	-1.20705	0.122661	-9.84054	7.53055e-23	8.6728e-21	Down	M_WCS417_30m-M_Control	RNA	AT2G40000	HSPRO2	ortholog of sugar beet HS1 PRO-1 2
BnaA09G0418800ZS	M_WCS417_30m	M_Control	41.655	268.956	155.306	-2.68959	0.273433	-9.83637	7.84882e-23	9.01884e-21	Down	M_WCS417_30m-M_Control	RNA	AT2G42760	--	--
BnaA05G0140300ZS	M_WCS417_30m	M_Control	85.327	369.437	227.382	-2.11428	0.215638	-9.80474	1.07423e-22	1.23158e-20	Down	M_WCS417_30m-M_Control	RNA	AT1G07400	HSP17.8	HSP20-like chaperones superfamily protein
BnaA07G0141400ZS	M_WCS417_30m	M_Control	508.603	1248.82	878.713	-1.29615	0.1322	-9.80448	1.07698e-22	1.23194e-20	Down	M_WCS417_30m-M_Control	RNA	AT5G67300	MYBR1	Member of the R2R3 factor MYB gene family involved in mediating plant responses to a variety of abiotic stimiuli.
BnaA09G0037500ZS	M_WCS417_30m	M_Control	29.6012	243.523	136.562	-3.04479	0.310923	-9.79274	1.20968e-22	1.38061e-20	Down	M_WCS417_30m-M_Control	RNA	AT3G26960	--	Pollen Ole e 1 allergen and extensin family protein
BnaC08G0440900ZS	M_WCS417_30m	M_Control	655.215	1581.81	1118.51	-1.27128	0.129863	-9.78939	1.25047e-22	1.42396e-20	Down	M_WCS417_30m-M_Control	RNA	AT2G22880	VQ12	VQ motif-containing protein
BnaA07G0010200ZS	M_WCS417_30m	M_Control	3985.55	7956.65	5971.1	-0.997396	0.101889	-9.78909	1.2542e-22	1.42501e-20	Normal	M_WCS417_30m-M_Control	RNA	AT2G19590	ATACO1	encodes a protein whose sequence is similar to 1-aminocyclopropane-1-carboxylate oxidase
BnaA01G0141700ZS	M_WCS417_30m	M_Control	712.305	1665.15	1188.73	-1.22481	0.125357	-9.77059	1.50575e-22	1.70699e-20	Down	M_WCS417_30m-M_Control	RNA	AT4G24570	UCP4	Encodes one of the mitochondrial dicarboxylate carriers (DIC): DIC1 (AT2G22500), DIC2 (AT4G24570), DIC3 (AT5G09470).
BnaC01G0510100ZS	M_WCS417_30m	M_Control	641.977	204.453	423.215	1.65254	0.169237	9.76462	1.59704e-22	1.80644e-20	Up	M_WCS417_30m-M_Control	RNA	AT3G03990	D14	alpha/beta-Hydrolases superfamily protein
BnaA09G0185100ZS	M_WCS417_30m	M_Control	464.541	1158	811.271	-1.31797	0.135073	-9.75745	1.71405e-22	1.93447e-20	Down	M_WCS417_30m-M_Control	RNA	AT5G42380	CML37	calmodulin like 37
BnaA01G0404600ZS	M_WCS417_30m	M_Control	629.119	194.935	412.027	1.69136	0.173414	9.7533	1.78574e-22	2.0109e-20	Up	M_WCS417_30m-M_Control	RNA	AT3G04070	SHYG	NAC domain containing protein 47
BnaC05G0100700ZS	M_WCS417_30m	M_Control	305.719	842.048	573.883	-1.4617	0.149974	-9.74634	1.91247e-22	2.14884e-20	Down	M_WCS417_30m-M_Control	RNA	AT1G12610	DDF1	Encodes a member of the DREB subfamily A-1 of ERF/AP2 transcription factor family (DDF1). The protein contains one AP2 domain. There are six members in this subfamily, including CBF1, CBF2, and CBF3. Overexpression of this gene results in delayed flowering and dwarfism, reduction of gibberellic acid biosynthesis, and increased tolerance to high levels of salt. This gene is expressed in all tissue…
BnaA07G0010300ZS	M_WCS417_30m	M_Control	3865.1	7726.32	5795.71	-0.999293	0.102546	-9.74486	1.94044e-22	2.17543e-20	Normal	M_WCS417_30m-M_Control	RNA	AT2G19590	ATACO1	encodes a protein whose sequence is similar to 1-aminocyclopropane-1-carboxylate oxidase
BnaC04G0086000ZS	M_WCS417_30m	M_Control	651.615	214.112	432.864	1.60499	0.164842	9.73653	2.10631e-22	2.35619e-20	Up	M_WCS417_30m-M_Control	RNA	AT2G37970	SOUL2	SOUL heme-binding family protein
BnaC01G0399200ZS	M_WCS417_30m	M_Control	617.496	1497.41	1057.45	-1.27769	0.131244	-9.73525	2.13291e-22	2.38068e-20	Down	M_WCS417_30m-M_Control	RNA	AT3G19030	--	--
BnaA03G0439400ZS	M_WCS417_30m	M_Control	723.356	242.976	483.166	1.5752	0.161929	9.72768	2.29783e-22	2.55913e-20	Up	M_WCS417_30m-M_Control	RNA	AT4G17215	--	Pollen Ole e 1 allergen and extensin family protein
BnaC07G0319400ZS	M_WCS417_30m	M_Control	617.17	167.328	392.249	1.88706	0.194194	9.71739	2.54204e-22	2.82489e-20	Up	M_WCS417_30m-M_Control	RNA	AT3G29240	DUF179-3	Protein of unknown function (DUF179)
BnaA04G0253600ZS	M_WCS417_30m	M_Control	15.2454	183.099	99.1724	-3.58654	0.369353	-9.71035	2.72393e-22	3.0204e-20	Down	M_WCS417_30m-M_Control	RNA	AT2G39800	P5CS1	delta1-pyrroline-5-carboxylate synthase 1
BnaA06G0149600ZS	M_WCS417_30m	M_Control	630.655	202.691	416.673	1.63658	0.168749	9.69829	3.06606e-22	3.39234e-20	Up	M_WCS417_30m-M_Control	RNA	AT1G21130	IGMT4	O-methyltransferase family protein
BnaC03G0679700ZS	M_WCS417_30m	M_Control	173.972	11.0565	92.5144	3.96156	0.408926	9.68772	3.40018e-22	3.75383e-20	Up	M_WCS417_30m-M_Control	RNA	AT4G39780	ERF60	encodes a member of the DREB subfamily A-6 of ERF/AP2 transcription factor family. The protein contains one AP2 domain. There are 8 members in this subfamily including RAP2.4.
BnaC03G0114800ZS	M_WCS417_30m	M_Control	679.279	1602.36	1140.82	-1.23851	0.128038	-9.67304	3.92557e-22	4.32445e-20	Down	M_WCS417_30m-M_Control	RNA	AT5G59820	ZAT12	Encodes a zinc finger protein involved in high light and cold acclimation. Overexpression of this putative transcription factor increases the expression level of 9 cold-responsive genes and represses the expression level of 15 cold-responsive genes, including CBF genes. Also, lines overexpressing this gene exhibits a small but reproducible increase in freeze tolerance. Because of the repression o…
BnaC09G0123200ZS	M_WCS417_30m	M_Control	1043.9	409.707	726.804	1.3488	0.139474	9.67062	4.01925e-22	4.41804e-20	Up	M_WCS417_30m-M_Control	RNA	AT2G18700	TPS11	Encodes an enzyme putatively involved in trehalose biosynthesis. The protein has a trehalose synthase (TPS)-like domain that may or may not be active as well as a trehalose phosphatase (TPP)-like domain.
BnaA04G0265300ZS	M_WCS417_30m	M_Control	676.065	226.259	451.162	1.58052	0.163626	9.65931	4.48886e-22	4.92356e-20	Up	M_WCS417_30m-M_Control	RNA	AT2G41480	PRX25	Encodes a cationic cell-wall-bound peroxidase homolog that is involved in the lignification of cell walls.
BnaA10G0269100ZS	M_WCS417_30m	M_Control	771.897	275.112	523.505	1.48821	0.154109	9.65682	4.59941e-22	5.03392e-20	Up	M_WCS417_30m-M_Control	RNA	AT5G06300	LOG7	Putative lysine decarboxylase family protein
BnaC08G0309800ZS	M_WCS417_30m	M_Control	89.9085	373.757	231.833	-2.05571	0.21305	-9.64891	4.96793e-22	5.42553e-20	Down	M_WCS417_30m-M_Control	RNA	AT3G50800	--	--
BnaA07G0141300ZS	M_WCS417_30m	M_Control	286.13	54.674	170.402	2.38899	0.247743	9.64302	5.2617e-22	5.7217e-20	Up	M_WCS417_30m-M_Control	RNA	AT5G67310	CYP81G1	member of CYP81G
BnaA09G0687600ZS	M_WCS417_30m	M_Control	525.491	1261.95	893.722	-1.26402	0.131219	-9.6329	5.80681e-22	6.30095e-20	Down	M_WCS417_30m-M_Control	RNA	AT1G03475	LIN2	Encodes coproporphyrinogen III oxidase, a key enzyme in the biosynthetic pathway of chlorophyll and heme, a tetrapyrrole pathway. Mutants express cytological and molecular markers associated with the defense responses, usually activated by pathogen infection.
BnaC06G0209800ZS	M_WCS417_30m	M_Control	235.495	699.8	467.648	-1.57064	0.163076	-9.63131	5.89744e-22	6.38561e-20	Down	M_WCS417_30m-M_Control	RNA	AT3G57930	--	--
BnaA06G0373900ZS	M_WCS417_30m	M_Control	692.336	1625.27	1158.8	-1.23094	0.127925	-9.62236	6.43401e-22	6.95174e-20	Down	M_WCS417_30m-M_Control	RNA	AT3G29010	--	Biotin/lipoate A/B protein ligase family
BnaA10G0161200ZS	M_WCS417_30m	M_Control	74.4162	359.67	217.043	-2.27491	0.236532	-9.61775	6.72901e-22	7.25502e-20	Down	M_WCS417_30m-M_Control	RNA	AT5G22920	RZPF34	CHY-type/CTCHY-type/RING-type Zinc finger protein
BnaA02G0025800ZS	M_WCS417_30m	M_Control	3308.08	1602.96	2455.52	1.04531	0.108853	9.60292	7.77077e-22	8.36043e-20	Up	M_WCS417_30m-M_Control	RNA	AT5G07440	GDH2	Encodes the alpha-subunit of the glutamate dehydrogenase. The enzyme is almost exclusively found in the mitochondria of stem and leaf companion cells.
Bnascaffold0349G0000200ZS	M_WCS417_30m	M_Control	2518.93	5033.26	3776.1	-0.998634	0.10404	-9.59852	8.1103e-22	8.70723e-20	Normal	M_WCS417_30m-M_Control	RNA	AT3G45640	MPK3	Encodes a mitogen-activated kinase whose mRNA levels increase in response to touch, cold, salinity stress and chitin oligomers.Also functions in ovule development. Heterozygous MPK3 mutants in a homozygous MPK6 background are female sterile due to defects in integument development. MPK3 can be dephosphorylated by MKP2 in vitro.
BnaC03G0437800ZS	M_WCS417_30m	M_Control	795.955	1795.8	1295.88	-1.17414	0.122355	-9.59617	8.29728e-22	8.88914e-20	Down	M_WCS417_30m-M_Control	RNA	AT3G19580	ZF2	Encodes zinc finger protein. mRNA levels are upregulated in response to ABA, high salt, and mild dessication. The protein is localized to the nucleus and acts as a transcriptional repressor.
BnaA01G0117900ZS	M_WCS417_30m	M_Control	245.665	35.6906	140.678	2.7751	0.28925	9.5941	8.46507e-22	9.04977e-20	Up	M_WCS417_30m-M_Control	RNA	AT4G21680	NRT1.8	Encodes a nitrate transporter (NRT1.8). Functions in nitrate removal from the xylem sap. Mediates cadmium tolerance.
BnaC03G0236200ZS	M_WCS417_30m	M_Control	2073.05	929.567	1501.31	1.15762	0.120663	9.59378	8.49121e-22	9.0586e-20	Up	M_WCS417_30m-M_Control	RNA	AT2G40890	REF8	encodes coumarate 3-hydroxylase (C3H), a P450-dependent monooxygenase. Involved in lignin biosynthesis and flavonoid biosynthesis. Also affects the biosynthesis of coumarins such as scopoletin and scopolin as a branching-out-pathway from the phenylpropanoid acid level.
BnaC03G0418100ZS	M_WCS417_30m	M_Control	354.48	947.43	650.955	-1.41889	0.14793	-9.59161	8.67191e-22	9.23195e-20	Down	M_WCS417_30m-M_Control	RNA	AT3G16510	--	Calcium-dependent lipid-binding (CaLB domain) family protein
BnaC01G0156000ZS	M_WCS417_30m	M_Control	2435.72	1151.99	1793.85	1.08016	0.112838	9.57263	1.04216e-21	1.10714e-19	Up	M_WCS417_30m-M_Control	RNA	AT4G22690	CYP706A1	member of CYP706A
BnaA03G0346400ZS	M_WCS417_30m	M_Control	331.683	907.434	619.559	-1.45235	0.151781	-9.56873	1.08229e-21	1.14736e-19	Down	M_WCS417_30m-M_Control	RNA	AT3G16510	--	Calcium-dependent lipid-binding (CaLB domain) family protein
BnaC08G0410000ZS	M_WCS417_30m	M_Control	768.941	267.549	518.245	1.52226	0.159107	9.56749	1.09537e-21	1.15881e-19	Up	M_WCS417_30m-M_Control	RNA	AT3G62010	--	--
BnaA09G0115600ZS	M_WCS417_30m	M_Control	2368.3	1087.62	1727.96	1.12308	0.117395	9.56669	1.10382e-21	1.16531e-19	Up	M_WCS417_30m-M_Control	RNA	AT2G18160	GBF5	Encodes a b-ZIP transcription factor.
BnaC06G0317200ZS	M_WCS417_30m	M_Control	261.031	744.197	502.614	-1.51089	0.158078	-9.5579	1.20174e-21	1.26605e-19	Down	M_WCS417_30m-M_Control	RNA	AT1G67880	--	beta-1,4-N-acetylglucosaminyltransferase family protein
BnaA02G0020400ZS	M_WCS417_30m	M_Control	272.29	43.7634	158.027	2.62816	0.275085	9.55399	1.24792e-21	1.31197e-19	Up	M_WCS417_30m-M_Control	RNA	AT5G05600	JOX2	2-oxoglutarate (2OG) and Fe(II)-dependent oxygenase superfamily protein
BnaC05G0449400ZS	M_WCS417_30m	M_Control	1284.06	534.484	909.273	1.26414	0.132323	9.55338	1.25527e-21	1.31696e-19	Up	M_WCS417_30m-M_Control	RNA	AT3G16530	--	Lectin like protein whose expression is induced upon treatment with chitin oligomers.
BnaA08G0201000ZS	M_WCS417_30m	M_Control	1577.66	694.248	1135.95	1.18459	0.124121	9.54384	1.37645e-21	1.44112e-19	Up	M_WCS417_30m-M_Control	RNA	AT4G38550	--	Arabidopsis phospholipase-like protein (PEARLI 4) family
BnaC01G0104700ZS	M_WCS417_30m	M_Control	68.0171	318.267	193.142	-2.22558	0.233286	-9.54013	1.42647e-21	1.49042e-19	Down	M_WCS417_30m-M_Control	RNA	AT4G28400	--	Protein phosphatase 2C family protein
BnaA06G0417300ZS	M_WCS417_30m	M_Control	504.933	148.745	326.839	1.76354	0.185168	9.524	1.66633e-21	1.73744e-19	Up	M_WCS417_30m-M_Control	RNA	AT5G47240	NUDX8	nudix hydrolase homolog 8
BnaA09G0406300ZS	M_WCS417_30m	M_Control	3177.43	1458.02	2317.73	1.12335	0.117996	9.52026	1.72743e-21	1.79744e-19	Up	M_WCS417_30m-M_Control	RNA	AT1G30730	AtBBE11	FAD-binding Berberine family protein
BnaA04G0208100ZS	M_WCS417_30m	M_Control	2172.08	991.441	1581.76	1.13192	0.119019	9.51041	1.89918e-21	1.97211e-19	Up	M_WCS417_30m-M_Control	RNA	AT2G32020	--	Acyl-CoA N-acyltransferases (NAT) superfamily protein
BnaC09G0347800ZS	M_WCS417_30m	M_Control	159.164	526.473	342.818	-1.72602	0.181649	-9.50197	2.0595e-21	2.13421e-19	Down	M_WCS417_30m-M_Control	RNA	AT5G52790	--	CBS domain-containing protein with a domain of unknown function (DUF21)
BnaC04G0015700ZS	M_WCS417_30m	M_Control	277.214	768.093	522.654	-1.47007	0.154819	-9.49543	2.19305e-21	2.26797e-19	Down	M_WCS417_30m-M_Control	RNA	AT2G46400	WRKY46	member of WRKY Transcription Factor; Group III
BnaA03G0461700ZS	M_WCS417_30m	M_Control	254.939	41.9698	148.455	2.60356	0.274544	9.48322	2.46551e-21	2.54455e-19	Up	M_WCS417_30m-M_Control	RNA	AT4G21680	NRT1.8	Encodes a nitrate transporter (NRT1.8). Functions in nitrate removal from the xylem sap. Mediates cadmium tolerance.
BnaA02G0314600ZS	M_WCS417_30m	M_Control	1724.56	730.114	1227.34	1.24077	0.130868	9.48108	2.51658e-21	2.59198e-19	Up	M_WCS417_30m-M_Control	RNA	AT2G01450	MPK17	member of MAP Kinase
BnaC05G0251200ZS	M_WCS417_30m	M_Control	47.1579	282.18	164.669	-2.57835	0.272241	-9.47082	2.77643e-21	2.85381e-19	Down	M_WCS417_30m-M_Control	RNA	AT2G42760	--	--
BnaA09G0090700ZS	M_WCS417_30m	M_Control	491.229	1181.94	836.583	-1.26647	0.133756	-9.46853	2.83811e-21	2.91131e-19	Down	M_WCS417_30m-M_Control	RNA	AT5G65207	--	--
BnaA02G0186800ZS	M_WCS417_30m	M_Control	1240.04	519.216	879.631	1.25624	0.13284	9.45679	3.17541e-21	3.25072e-19	Up	M_WCS417_30m-M_Control	RNA	AT1G70290	TPS8	Encodes an enzyme putatively involved in trehalose biosynthesis. Though the protein has both trehalose-6-phosphate synthase (TPS)-like and trehalose-6-phosphate phosphatase (TPP)-like domains, neither activity has been detected in enzymatic assays nor has the protein been able to complement yeast TPS or TPP mutants.
BnaA03G0473300ZS	M_WCS417_30m	M_Control	412.016	111.505	261.761	1.88523	0.199549	9.44745	3.47186e-21	3.54704e-19	Up	M_WCS417_30m-M_Control	RNA	AT4G23570	SGT1A	Closely related to SGT1B, may function in SCF(TIR1) mediated protein degradation. AtSGT1a and AtSGT1b are functionally redundant in the resistance to pathogenes. AtSGT1b was more highly expressed than AtSGT1. The N-terminal TPR domain of AtSGT1a reduces the steady-state level of Arabidopsis SGT1 proteins whereas the same domain from AtSGT1b enhances SGT1 accumulation. The TPR domain is dispensabl…
BnaA09G0423300ZS	M_WCS417_30m	M_Control	74.774	332.406	203.59	-2.15336	0.228142	-9.43867	3.7753e-21	3.84929e-19	Down	M_WCS417_30m-M_Control	RNA	AT1G28370	ERF11	encodes a member of the ERF (ethylene response factor) subfamily B-1 of ERF/AP2 transcription factor family. The protein contains one AP2 domain. There are 15 members in this subfamily including ATERF-3, ATERF-4, ATERF-7, and leafy petiole.
BnaC02G0247200ZS	M_WCS417_30m	M_Control	947.576	344.106	645.841	1.46336	0.155079	9.43623	3.86418e-21	3.932e-19	Up	M_WCS417_30m-M_Control	RNA	AT1G70290	TPS8	Encodes an enzyme putatively involved in trehalose biosynthesis. Though the protein has both trehalose-6-phosphate synthase (TPS)-like and trehalose-6-phosphate phosphatase (TPP)-like domains, neither activity has been detected in enzymatic assays nor has the protein been able to complement yeast TPS or TPP mutants.
BnaA08G0204400ZS	M_WCS417_30m	M_Control	1683.72	730.08	1206.9	1.20517	0.127873	9.42475	4.31111e-21	4.37798e-19	Up	M_WCS417_30m-M_Control	RNA	AT1G30360	OSCA3.1	Early-responsive to dehydration stress protein (ERD4)
BnaA10G0013200ZS	M_WCS417_30m	M_Control	159.601	532.358	345.98	-1.7389	0.18477	-9.41119	4.90536e-21	4.97148e-19	Down	M_WCS417_30m-M_Control	RNA	AT5G38700	--	--
BnaC05G0518100ZS	M_WCS417_30m	M_Control	384.201	99.5756	241.888	1.94898	0.207383	9.39798	5.562e-21	5.62572e-19	Up	M_WCS417_30m-M_Control	RNA	AT3G07310	--	Protein of unknown function (DUF760)
BnaA04G0150300ZS	M_WCS417_30m	M_Control	618.075	206.086	412.081	1.58335	0.168522	9.3955	5.69477e-21	5.74854e-19	Up	M_WCS417_30m-M_Control	RNA	AT2G22860	PSK2	Phytosulfokine 2 precursor, coding for a unique plant peptide growth factor.
BnaA08G0148400ZS	M_WCS417_30m	M_Control	212.698	632.053	422.376	-1.57097	0.167215	-9.39492	5.7261e-21	5.76867e-19	Down	M_WCS417_30m-M_Control	RNA	AT4G31800	WRKY18	Pathogen-induced transcription factor. Binds W-box sequences in vitro. Forms protein complexes with itself and with WRKY40 and WRKY60. Constitutive expression of WRKY18 enhanced resistance to P. syringae, but its coexpression with WRKY40 or WRKY60 made plants more susceptible to both P. syringae and B. cinerea. WRKY18, WRKY40, and WRKY60 have partially redundant roles in response to the hemibiotr…
BnaC03G0306100ZS	M_WCS417_30m	M_Control	376.618	94.1178	235.368	1.99795	0.2128	9.38888	6.06414e-21	6.0971e-19	Up	M_WCS417_30m-M_Control	RNA	AT4G11360	RHA1B	Encodes a putative RING-H2 finger protein RHA1b.
BnaA06G0329700ZS	M_WCS417_30m	M_Control	449.479	1092.59	771.036	-1.28122	0.136626	-9.37755	6.75209e-21	6.77535e-19	Down	M_WCS417_30m-M_Control	RNA	AT5G24590	TIP	Member of NAc protein family. Interacts with turnip crinkle virus (TCV) capsid protein. Transcription factor involved in regulating the defense response of Arabidopsis to TCV.
BnaC09G0299800ZS	M_WCS417_30m	M_Control	285.677	58.0684	171.873	2.29946	0.245283	9.3747	6.93748e-21	6.94763e-19	Up	M_WCS417_30m-M_Control	RNA	AT4G10720	--	Ankyrin repeat family protein
BnaC03G0651000ZS	M_WCS417_30m	M_Control	491.014	1188.38	839.697	-1.2756	0.136122	-9.371	7.18502e-21	7.18133e-19	Down	M_WCS417_30m-M_Control	RNA	AT1G28370	ERF11	encodes a member of the ERF (ethylene response factor) subfamily B-1 of ERF/AP2 transcription factor family. The protein contains one AP2 domain. There are 15 members in this subfamily including ATERF-3, ATERF-4, ATERF-7, and leafy petiole.
BnaC07G0437700ZS	M_WCS417_30m	M_Control	237.066	35.228	136.147	2.74295	0.292746	9.36974	7.27112e-21	7.25308e-19	Up	M_WCS417_30m-M_Control	RNA	AT4G21680	NRT1.8	Encodes a nitrate transporter (NRT1.8). Functions in nitrate removal from the xylem sap. Mediates cadmium tolerance.
BnaA04G0072900ZS	M_WCS417_30m	M_Control	2569.47	1241.01	1905.24	1.0498	0.112091	9.36567	7.55711e-21	7.52355e-19	Up	M_WCS417_30m-M_Control	RNA	AT4G13930	SHM4	Encodes a serine hydroxymethyltransferase maximally expressed in root
BnaA03G0166200ZS	M_WCS417_30m	M_Control	60.529	310.521	185.525	-2.35845	0.25196	-9.36038	7.94498e-21	7.8942e-19	Down	M_WCS417_30m-M_Control	RNA	AT2G34600	TIFY5B	jasmonate-zim-domain protein 7
BnaC06G0191000ZS	M_WCS417_30m	M_Control	283.565	767.059	525.312	-1.43595	0.153519	-9.35362	8.46997e-21	8.39936e-19	Down	M_WCS417_30m-M_Control	RNA	AT3G54810	GATA8	Encodes a protein containing a GATA type zinc finger domain that is expressed in the embryo axis and involved in germination. Mutants have a reduced rate of germination even when stratified.
BnaA01G0284100ZS	M_WCS417_30m	M_Control	225.148	662.783	443.966	-1.55725	0.166521	-9.35169	8.62612e-21	8.5375e-19	Down	M_WCS417_30m-M_Control	RNA	AT1G61890	--	MATE efflux family protein
BnaA02G0125000ZS	M_WCS417_30m	M_Control	2939.68	1365.95	2152.82	1.1052	0.118248	9.34649	9.06057e-21	8.95001e-19	Up	M_WCS417_30m-M_Control	RNA	AT5G56030	HSP90.2	A member of heat shock protein 90 (HSP90) gene family. Expressed in all tissues and abundant in root apical meristem, pollen and tapetum. Expression is NOT heat-induced but induced by IAA and NaCl. Interacts with HsfA1d in the cytosol and the nucleus and negatively regulates HsfA1d. Did not bind to AtHsfA4c.
BnaC01G0143800ZS	M_WCS417_30m	M_Control	228.007	34.3027	131.155	2.72623	0.291698	9.34606	9.09765e-21	8.96915e-19	Up	M_WCS417_30m-M_Control	RNA	AT4G21680	NRT1.8	Encodes a nitrate transporter (NRT1.8). Functions in nitrate removal from the xylem sap. Mediates cadmium tolerance.
BnaA10G0231200ZS	M_WCS417_30m	M_Control	757.431	272.846	515.138	1.47245	0.157611	9.34226	9.43001e-21	9.27877e-19	Up	M_WCS417_30m-M_Control	RNA	AT5G12010	--	--
BnaA06G0285800ZS	M_WCS417_30m	M_Control	204.995	26.6925	115.844	2.93752	0.314669	9.33527	1.00736e-20	9.8928e-19	Up	M_WCS417_30m-M_Control	RNA	AT5G63450	CYP94B1	member of CYP94B
BnaC02G0483200ZS	M_WCS417_30m	M_Control	384.511	1007.68	696.094	-1.39047	0.149051	-9.32885	1.07027e-20	1.04903e-18	Down	M_WCS417_30m-M_Control	RNA	AT5G48150	PAT1	Member of GRAS gene family. Semi-dominant mutant has a reduced response to far-red light and appears to act early in the phytochrome A signaling pathway.
BnaA03G0066200ZS	M_WCS417_30m	M_Control	578.811	192.206	385.509	1.59095	0.170653	9.32277	1.13338e-20	1.10874e-18	Up	M_WCS417_30m-M_Control	RNA	AT5G16010	--	3-oxo-5-alpha-steroid 4-dehydrogenase family protein
BnaA07G0377700ZS	M_WCS417_30m	M_Control	4334.1	2198.69	3266.4	0.97903	0.105024	9.322	1.14169e-20	1.11472e-18	Normal	M_WCS417_30m-M_Control	RNA	AT1G78830	MNB1	Curculin-like (mannose-binding) lectin family protein
BnaC02G0206400ZS	M_WCS417_30m	M_Control	2268.58	1068.5	1668.54	1.08597	0.116529	9.31937	1.17036e-20	1.14052e-18	Up	M_WCS417_30m-M_Control	RNA	AT3G44840	--	S-adenosyl-L-methionine-dependent methyltransferases superfamily protein
BnaC03G0413000ZS	M_WCS417_30m	M_Control	2185.01	1031.44	1608.22	1.08303	0.11622	9.31876	1.17704e-20	1.14482e-18	Up	M_WCS417_30m-M_Control	RNA	AT3G15630	--	--
BnaA03G0229900ZS	M_WCS417_30m	M_Control	1880.05	856.197	1368.12	1.13473	0.121976	9.30295	1.36605e-20	1.32611e-18	Up	M_WCS417_30m-M_Control	RNA	AT2G29450	GSTU5	Encodes a member of the TAU glutathione S-transferase gene family. Gene expression is induced by exposure to auxin, pathogen and herbicides. Naming convention according to Wagner et al. (2002)
BnaC06G0062100ZS	M_WCS417_30m	M_Control	213.826	31.6827	122.754	2.75504	0.296343	9.29681	1.44724e-20	1.4019e-18	Up	M_WCS417_30m-M_Control	RNA	AT3G16410	NSP4	Encodes a nitrile-specifier protein NSP4. NSP4 is one out of five (At3g16400/NSP1, At2g33070/NSP2, At3g16390/NSP3, At3g16410/NSP4 and At5g48180/NSP5) A. thaliana epithiospecifier protein (ESP) homologues that promote simple nitrile, but not epithionitrile or thiocyanate formation.
BnaA09G0588200ZS	M_WCS417_30m	M_Control	2155.79	977.937	1566.86	1.14022	0.122648	9.29663	1.44965e-20	1.4019e-18	Up	M_WCS417_30m-M_Control	RNA	AT2G23120	--	Late embryogenesis abundant protein, group 6
BnaA06G0288800ZS	M_WCS417_30m	M_Control	337.885	876.484	607.185	-1.37486	0.148005	-9.28931	1.55295e-20	1.49894e-18	Down	M_WCS417_30m-M_Control	RNA	AT5G63790	NAC102	Encodes a member of the NAC family of transcription factors. ANAC102 appears to have a role in mediating response to low oxygen stress (hypoxia) in germinating seedlings.
BnaC07G0451800ZS	M_WCS417_30m	M_Control	2170.87	1016.6	1593.73	1.09409	0.117806	9.28722	1.58376e-20	1.52577e-18	Up	M_WCS417_30m-M_Control	RNA	AT4G23570	SGT1A	Closely related to SGT1B, may function in SCF(TIR1) mediated protein degradation. AtSGT1a and AtSGT1b are functionally redundant in the resistance to pathogenes. AtSGT1b was more highly expressed than AtSGT1. The N-terminal TPR domain of AtSGT1a reduces the steady-state level of Arabidopsis SGT1 proteins whereas the same domain from AtSGT1b enhances SGT1 accumulation. The TPR domain is dispensabl…
BnaC03G0459300ZS	M_WCS417_30m	M_Control	115.881	416.454	266.168	-1.84555	0.198892	-9.27914	1.70859e-20	1.64291e-18	Down	M_WCS417_30m-M_Control	RNA	AT3G23170	PRP	--
BnaA03G0147400ZS	M_WCS417_30m	M_Control	6472.46	3378.03	4925.24	0.938208	0.101174	9.2732	1.80649e-20	1.73375e-18	Normal	M_WCS417_30m-M_Control	RNA	AT2G30490	REF3	Encodes a cinnamate-4-hydroxylase. Mutations in this gene impact phenylpropanoid metabolism, growth and development.
BnaA09G0545800ZS	M_WCS417_30m	M_Control	32.0075	215.707	123.857	-2.75274	0.296871	-9.2725	1.81825e-20	1.74174e-18	Down	M_WCS417_30m-M_Control	RNA	AT3G59900	ARGOS	Encodes ARGOS (Auxin-Regulated Gene Involved in Organ Size). Inducible by auxin. Involved in lateral organ size control. Transgenic plants expressing sense or antisense ARGOS cDNA display enlarged or reduced aerial organs, respectively. The alteration in organ size is attributable mainly to changes in cell number and the duration of organ growth.
BnaC06G0410600ZS	M_WCS417_30m	M_Control	983.418	398.708	691.063	1.30254	0.140578	9.2656	1.93984e-20	1.85471e-18	Up	M_WCS417_30m-M_Control	RNA	AT1G74840	--	Homeodomain-like superfamily protein
BnaA07G0110000ZS	M_WCS417_30m	M_Control	444.293	123.072	283.682	1.84899	0.199596	9.26366	1.97547e-20	1.88522e-18	Up	M_WCS417_30m-M_Control	RNA	AT1G26800	SNIPER2	RING/U-box superfamily protein
BnaC01G0024300ZS	M_WCS417_30m	M_Control	337.537	79.6199	208.578	2.08558	0.225201	9.261	2.02523e-20	1.92907e-18	Up	M_WCS417_30m-M_Control	RNA	AT4G36670	PMT6	Major facilitator superfamily protein
BnaA01G0071200ZS	M_WCS417_30m	M_Control	1078.84	449.624	764.231	1.26266	0.136359	9.25982	2.04774e-20	1.94685e-18	Up	M_WCS417_30m-M_Control	RNA	AT4G30210	ATR2	Encodes NADPH-cytochrome P450 reductase that catalyzes the first oxidative step of the phenylpropanoid general pathway.
BnaC04G0129000ZS	M_WCS417_30m	M_Control	181.707	19.3372	100.522	3.22531	0.348322	9.25957	2.05251e-20	1.94773e-18	Up	M_WCS417_30m-M_Control	RNA	AT2G34180	WL2	Encodes CBL-interacting protein kinase 13 (CIPK13).
BnaA03G0137200ZS	M_WCS417_30m	M_Control	135.629	460.384	298.006	-1.76267	0.190422	-9.25664	2.10963e-20	1.99819e-18	Down	M_WCS417_30m-M_Control	RNA	AT5G52050	DTX50	MATE efflux family protein
BnaA10G0084200ZS	M_WCS417_30m	M_Control	666.908	1497.66	1082.29	-1.16734	0.126159	-9.25294	2.18399e-20	2.06476e-18	Down	M_WCS417_30m-M_Control	RNA	AT5G51190	ERF105	encodes a member of the ERF (ethylene response factor) subfamily B-3 of ERF/AP2 transcription factor family. The protein contains one AP2 domain. There are 18 members in this subfamily including ATERF-1, ATERF-2, AND ATERF-5.
BnaC01G0411000ZS	M_WCS417_30m	M_Control	491.524	140.813	316.168	1.80025	0.195079	9.22831	2.74937e-20	2.59445e-18	Up	M_WCS417_30m-M_Control	RNA	AT3G17700	CNGC20	cyclic nucleotide-binding transporter 1, member of a family of cyclic nucleotide gated channels.
BnaC03G0763000ZS	M_WCS417_30m	M_Control	175.014	577.206	376.11	-1.72015	0.186799	-9.20857	3.30493e-20	3.1129e-18	Down	M_WCS417_30m-M_Control	RNA	AT4G31800	WRKY18	Pathogen-induced transcription factor. Binds W-box sequences in vitro. Forms protein complexes with itself and with WRKY40 and WRKY60. Constitutive expression of WRKY18 enhanced resistance to P. syringae, but its coexpression with WRKY40 or WRKY60 made plants more susceptible to both P. syringae and B. cinerea. WRKY18, WRKY40, and WRKY60 have partially redundant roles in response to the hemibiotr…
BnaA02G0013400ZS	M_WCS417_30m	M_Control	3976.69	2020.52	2998.6	0.976725	0.106122	9.20377	3.456e-20	3.24915e-18	Normal	M_WCS417_30m-M_Control	RNA	AT5G03620	--	Subtilisin-like serine endopeptidase family protein
BnaA01G0314700ZS	M_WCS417_30m	M_Control	608.238	196.615	402.426	1.6266	0.176847	9.19782	3.653e-20	3.428e-18	Up	M_WCS417_30m-M_Control	RNA	AT3G20340	--	Expression of the gene is downregulated in the presence of paraquat, an inducer of photoxidative stress.
BnaA02G0015100ZS	M_WCS417_30m	M_Control	15.7774	170.608	93.1927	-3.43572	0.373835	-9.19048	3.91094e-20	3.66327e-18	Down	M_WCS417_30m-M_Control	RNA	AT5G04120	--	Encodes a cofactor-dependent phosphoglycerate mutase (dPGM) - like protein with phosphoserine phosphatase activity that may be responsible for serine anabolism.
BnaC08G0253200ZS	M_WCS417_30m	M_Control	1495.71	666.635	1081.17	1.16646	0.127088	9.17837	4.37671e-20	4.09199e-18	Up	M_WCS417_30m-M_Control	RNA	AT1G19380	--	Protein of unknown function (DUF1195)
BnaA10G0274900ZS	M_WCS417_30m	M_Control	2861.84	1362.68	2112.26	1.07063	0.116832	9.16387	5.00704e-20	4.67269e-18	Up	M_WCS417_30m-M_Control	RNA	AT5G05440	RCAR8	Encodes a member of the PYR (pyrabactin resistance )/PYL(PYR1-like)/RCAR (regulatory components of ABA receptor) family proteins with 14 members. PYR/PYL/RCAR family proteins function as abscisic acid sensors. Mediate ABA-dependent regulation of protein phosphatase 2Cs ABI1 and ABI2.
BnaC08G0004100ZS	M_WCS417_30m	M_Control	8589.99	4533.52	6561.76	0.922054	0.100657	9.16035	5.17294e-20	4.81863e-18	Normal	M_WCS417_30m-M_Control	RNA	AT1G03220	SAP2	Eukaryotic aspartyl protease family protein
BnaA02G0383600ZS	M_WCS417_30m	M_Control	812.169	303.853	558.011	1.41693	0.154689	9.15981	5.19886e-20	4.83389e-18	Up	M_WCS417_30m-M_Control	RNA	AT5G24810	ABC1K11	ABC1 family protein
BnaA09G0664400ZS	M_WCS417_30m	M_Control	536.06	170.816	353.438	1.65205	0.180395	9.15795	5.28949e-20	4.90915e-18	Up	M_WCS417_30m-M_Control	RNA	AT1G08860	BON3	Encodes a copine-like protein, which is a member of a newly identified class of calcium-dependent, phospholipid binding proteins that are present in a wide range of organisms. Overexpression of this gene suppresses bon1-1 phenotypes. Double mutant analyses with bon1-1 suggest that BON1 and BON3 have overlapping functions in maintaining cellular homeostasis and inhibiting cell death.
BnaA06G0081600ZS	M_WCS417_30m	M_Control	1873.66	872.078	1372.87	1.1029	0.120438	9.15745	5.31398e-20	4.92286e-18	Up	M_WCS417_30m-M_Control	RNA	AT1G63000	UER1	nucleotide-rhamnose synthase/epimerase-reductase
BnaA10G0195700ZS	M_WCS417_30m	M_Control	5329.58	2770.05	4049.81	0.944228	0.103147	9.15422	5.47496e-20	5.06274e-18	Normal	M_WCS417_30m-M_Control	RNA	AT5G17330	GAD1	Encodes one of two isoforms of glutamate decarboxylase.
BnaC03G0251400ZS	M_WCS417_30m	M_Control	710.39	1553.93	1132.16	-1.12936	0.123709	-9.12913	6.9052e-20	6.37366e-18	Down	M_WCS417_30m-M_Control	RNA	AT2G43710	SSI2	Encodes a stearoyl-ACP desaturase, involved in fatty acid desaturation. The ssi2 mutants have increased 18:0 and reduced 18:1 fatty acids. Exogenous application of glycerol to wild type plants mimics the ssi2 mutant phenotype. The altered 18:1 fatty acid content in the ssi2 mutants has an impact on SA- and JA-mediated defense signaling. ssi2 mutants resulted in hyper-resistance to green peach aph…
BnaA09G0129600ZS	M_WCS417_30m	M_Control	649.981	231.702	440.842	1.48781	0.163195	9.11674	7.74178e-20	7.13286e-18	Up	M_WCS417_30m-M_Control	RNA	AT1G62975	--	basic helix-loop-helix (bHLH) DNA-binding superfamily protein
BnaC08G0367000ZS	M_WCS417_30m	M_Control	817.346	1795.93	1306.64	-1.1361	0.12466	-9.11358	7.97041e-20	7.33018e-18	Down	M_WCS417_30m-M_Control	RNA	AT3G56880	--	VQ motif-containing protein
BnaA08G0139100ZS	M_WCS417_30m	M_Control	1262.19	2601.71	1931.95	-1.04352	0.114542	-9.11031	8.21463e-20	7.52745e-18	Down	M_WCS417_30m-M_Control	RNA	AT4G33920	APD5	Protein phosphatase 2C family protein
BnaC06G0427100ZS	M_WCS417_30m	M_Control	933.974	1961.45	1447.71	-1.07046	0.117503	-9.11005	8.23404e-20	7.53162e-18	Down	M_WCS417_30m-M_Control	RNA	AT1G76650	CML38	calmodulin-like 38
BnaC06G0105500ZS	M_WCS417_30m	M_Control	916.474	364.103	640.289	1.33282	0.14632	9.10893	8.32015e-20	7.59667e-18	Up	M_WCS417_30m-M_Control	RNA	AT1G33700	--	Beta-glucosidase, GBA2 type family protein
BnaA03G0276700ZS	M_WCS417_30m	M_Control	594.31	198.179	396.244	1.58616	0.174639	9.0825	1.06109e-19	9.67081e-18	Up	M_WCS417_30m-M_Control	RNA	AT4G01010	CNGC13	member of Cyclic nucleotide gated channel family
BnaA05G0014800ZS	M_WCS417_30m	M_Control	430.438	1030.83	730.633	-1.25982	0.138898	-9.07012	1.18886e-19	1.08158e-17	Down	M_WCS417_30m-M_Control	RNA	AT2G46490	--	--
BnaC03G0640100ZS	M_WCS417_30m	M_Control	2514.26	1223.89	1869.07	1.03853	0.114546	9.06644	1.22972e-19	1.11675e-17	Up	M_WCS417_30m-M_Control	RNA	--	--	--
BnaC01G0418100ZS	M_WCS417_30m	M_Control	339.053	78.5956	208.825	2.11391	0.233293	9.06119	1.29039e-19	1.16975e-17	Up	M_WCS417_30m-M_Control	RNA	AT3G16900	--	Protein of unknown function (DUF567)
BnaA05G0347100ZS	M_WCS417_30m	M_Control	385.306	104.924	245.115	1.87772	0.207276	9.05905	1.31587e-19	1.19072e-17	Up	M_WCS417_30m-M_Control	RNA	AT3G21070	NADK1	Encodes a protein with NAD(H) kinase activity.
BnaC07G0519100ZS	M_WCS417_30m	M_Control	1473.65	669.354	1071.5	1.13886	0.125752	9.05638	1.34856e-19	1.21813e-17	Up	M_WCS417_30m-M_Control	RNA	AT4G34200	PGDH1	Encodes a 3-phosphoglycerate dehydrogenase that is essential for embryo and pollen development.
BnaC03G0641900ZS	M_WCS417_30m	M_Control	3979.26	2054.42	3016.84	0.953683	0.105397	9.04849	1.44965e-19	1.30711e-17	Normal	M_WCS417_30m-M_Control	RNA	--	--	--
BnaA02G0043400ZS	M_WCS417_30m	M_Control	104.86	395.356	250.108	-1.91614	0.211828	-9.04575	1.48648e-19	1.33794e-17	Down	M_WCS417_30m-M_Control	RNA	AT5G12020	HSP17.6II	17.6 kDa class II heat shock protein
BnaC04G0458500ZS	M_WCS417_30m	M_Control	1774.04	813.208	1293.62	1.12538	0.124423	9.04477	1.49979e-19	1.34753e-17	Up	M_WCS417_30m-M_Control	RNA	AT2G24570	WRKY17	member of WRKY Transcription Factor; Group II-d; negative regulator of basal resistance to Pseudomonas syringae.
BnaC08G0486400ZS	M_WCS417_30m	M_Control	344.5	89.0287	216.764	1.95122	0.216318	9.02013	1.8787e-19	1.68498e-17	Up	M_WCS417_30m-M_Control	RNA	AT1G15100	RHA2A	Encodes a putative RING-H2 finger protein RHA2a.
BnaC01G0008700ZS	M_WCS417_30m	M_Control	254.942	41.8189	148.381	2.61492	0.289952	9.01845	1.90771e-19	1.70797e-17	Up	M_WCS417_30m-M_Control	RNA	AT4G39780	ERF60	encodes a member of the DREB subfamily A-6 of ERF/AP2 transcription factor family. The protein contains one AP2 domain. There are 8 members in this subfamily including RAP2.4.
BnaA09G0250600ZS	M_WCS417_30m	M_Control	1430.26	2865.14	2147.7	-1.00245	0.111177	-9.01672	1.93801e-19	1.73204e-17	Down	M_WCS417_30m-M_Control	RNA	AT4G11280	ATACS6	encodes a a member of the 1-aminocyclopropane-1-carboxylate (ACC) synthase (S-adenosyl-L-methionine methylthioadenosine-lyase, EC 4.4.1.14) gene family
BnaC02G0147500ZS	M_WCS417_30m	M_Control	493.405	153.277	323.341	1.68903	0.187326	9.01652	1.94165e-19	1.73224e-17	Up	M_WCS417_30m-M_Control	RNA	AT5G57220	CYP81F2	member of CYP81F, involved in glucosinolate metabolism. Mutants had impaired resistance to fungi.
BnaA05G0474300ZS	M_WCS417_30m	M_Control	480.907	152.446	316.677	1.65736	0.184057	9.0046	2.16455e-19	1.9277e-17	Up	M_WCS417_30m-M_Control	RNA	AT3G05500	SRP3	Encodes a protein that associates with lipid droplet surfaces.
BnaA05G0400500ZS	M_WCS417_30m	M_Control	5424.05	2862.7	4143.38	0.922	0.102436	9.0007	2.24274e-19	1.99384e-17	Normal	M_WCS417_30m-M_Control	RNA	AT3G16530	--	Lectin like protein whose expression is induced upon treatment with chitin oligomers.
BnaA09G0151900ZS	M_WCS417_30m	M_Control	222.663	36.7718	129.717	2.59278	0.288178	8.99714	2.31672e-19	2.056e-17	Up	M_WCS417_30m-M_Control	RNA	AT1G12630	--	encodes a member of the DREB subfamily A-4 of ERF/AP2 transcription factor family. The protein contains one AP2 domain. There are 17 members in this subfamily including TINY.
BnaC06G0127100ZS	M_WCS417_30m	M_Control	1928.9	921.714	1425.31	1.0651	0.118433	8.9933	2.39909e-19	2.12538e-17	Up	M_WCS417_30m-M_Control	RNA	AT1G53210	NCL	Encodes a Na+/Ca 2+ exchanger-like protein that participates in the maintenance of Ca 2+ homeostasis.
BnaA07G0222800ZS	M_WCS417_30m	M_Control	8430.91	4567.63	6499.27	0.884236	0.0983588	8.98991	2.47431e-19	2.18819e-17	Normal	M_WCS417_30m-M_Control	RNA	AT1G59870	PEN3	ATP binding cassette transporter. Localized to the plasma membrane in uninfected cells. In infected leaves, the protein concentrated at infection sites. Contributes to nonhost resistance to inappropriate pathogens that enter by direct penetration in a salicylic acid鈥揹ependent manner. Required for mlo resistance. Has Cd transporter activity (Cd2+ extrusion pump) and contributes to heavy metal resi…
BnaC08G0458800ZS	M_WCS417_30m	M_Control	1345.93	599.205	972.566	1.16809	0.129947	8.98899	2.49502e-19	2.20266e-17	Up	M_WCS417_30m-M_Control	RNA	AT2G20560	DNAJ	DNAJ heat shock family protein
BnaA06G0314600ZS	M_WCS417_30m	M_Control	1268.97	562.616	915.792	1.17306	0.130545	8.98591	2.56596e-19	2.26135e-17	Up	M_WCS417_30m-M_Control	RNA	AT2G17840	ERD7	Identified as drought-inducible gene by differential hybridization. Upregulated by high light, drought, cold and salt stress determined by microarray analysis.
BnaC08G0490300ZS	M_WCS417_30m	M_Control	632.343	214.48	423.412	1.56074	0.173744	8.98303	2.63421e-19	2.31746e-17	Up	M_WCS417_30m-M_Control	RNA	AT1G14540	PRX4	Peroxidase superfamily protein
BnaA02G0200900ZS	M_WCS417_30m	M_Control	78.2283	325.659	201.944	-2.05834	0.229206	-8.9803	2.70025e-19	2.37145e-17	Down	M_WCS417_30m-M_Control	RNA	AT1G72540	PBL33	Protein kinase superfamily protein
BnaC05G0535200ZS	M_WCS417_30m	M_Control	394.612	112.431	253.521	1.81088	0.201783	8.97441	2.84883e-19	2.49761e-17	Up	M_WCS417_30m-M_Control	RNA	AT3G05500	SRP3	Encodes a protein that associates with lipid droplet surfaces.
BnaA06G0125600ZS	M_WCS417_30m	M_Control	482.234	151.521	316.877	1.67036	0.186276	8.96712	3.04359e-19	2.66374e-17	Up	M_WCS417_30m-M_Control	RNA	AT1G18330	RVE7	EARLY-PHYTOCHROME-RESPONSIVE1
BnaC06G0370900ZS	M_WCS417_30m	M_Control	288.274	64.4985	176.386	2.16177	0.241261	8.9603	3.23797e-19	2.82899e-17	Up	M_WCS417_30m-M_Control	RNA	AT3G29670	PMAT2	Encodes a malonyltransferase that may play a role in phenolic xenobiotic detoxification.
BnaA01G0339200ZS	M_WCS417_30m	M_Control	474.562	151.469	313.016	1.64735	0.18391	8.95735	3.32563e-19	2.90056e-17	Up	M_WCS417_30m-M_Control	RNA	AT3G16800	EGR3	Protein phosphatase 2C family protein
BnaC05G0012900ZS	M_WCS417_30m	M_Control	1678.56	777.695	1228.13	1.10938	0.124027	8.94461	3.73261e-19	3.24994e-17	Up	M_WCS417_30m-M_Control	RNA	AT1G02360	--	Chitinase family protein
BnaA08G0244400ZS	M_WCS417_30m	M_Control	765.473	299.392	532.433	1.35465	0.151808	8.92345	4.51985e-19	3.92862e-17	Up	M_WCS417_30m-M_Control	RNA	AT1G21130	IGMT4	O-methyltransferase family protein
BnaA07G0219300ZS	M_WCS417_30m	M_Control	682.935	241.833	462.384	1.49744	0.167842	8.92171	4.59143e-19	3.98401e-17	Up	M_WCS417_30m-M_Control	RNA	AT3G62150	PGP21	Encodes a facultative transporter controlling auxin concentrations in plant cells.
BnaA06G0035700ZS	M_WCS417_30m	M_Control	255.496	47.7244	151.61	2.4133	0.270723	8.91427	4.91057e-19	4.25364e-17	Up	M_WCS417_30m-M_Control	RNA	AT3G29630	--	UDP-Glycosyltransferase superfamily protein
BnaA02G0147300ZS	M_WCS417_30m	M_Control	29.9431	200.024	114.984	-2.73871	0.307467	-8.90732	5.22832e-19	4.52116e-17	Down	M_WCS417_30m-M_Control	RNA	AT5G52020	--	encodes a member of the DREB subfamily A-4 of ERF/AP2 transcription factor family. The protein contains one AP2 domain. There are 17 members in this subfamily including TINY.
BnaC09G0428900ZS	M_WCS417_30m	M_Control	521.894	1185.15	853.523	-1.18347	0.132894	-8.90543	5.3178e-19	4.5907e-17	Down	M_WCS417_30m-M_Control	RNA	AT5G59450	--	GRAS family transcription factor
BnaC09G0564100ZS	M_WCS417_30m	M_Control	1546.82	3118.59	2332.7	-1.01177	0.113769	-8.8932	5.93749e-19	5.11694e-17	Down	M_WCS417_30m-M_Control	RNA	AT5G08790	ATAF2	induced by wounding, belongs to a large family of putative transcriptional activators with NAC domain.
BnaC02G0460200ZS	M_WCS417_30m	M_Control	376.206	922.202	649.204	-1.29308	0.145559	-8.88355	6.4761e-19	5.57165e-17	Down	M_WCS417_30m-M_Control	RNA	AT3G27210	--	--
BnaC06G0234700ZS	M_WCS417_30m	M_Control	446.231	138.094	292.162	1.69101	0.190367	8.8829	6.51404e-19	5.59479e-17	Up	M_WCS417_30m-M_Control	RNA	AT3G62150	PGP21	Encodes a facultative transporter controlling auxin concentrations in plant cells.
BnaA09G0137100ZS	M_WCS417_30m	M_Control	3044.43	1546.13	2295.28	0.977587	0.110095	8.87951	6.71576e-19	5.75828e-17	Normal	M_WCS417_30m-M_Control	RNA	AT1G64160	DIR5	Encodes a dirigent protein involved in the synthesis of (-)pinoresinol. Dirigent proteins impart stereoselectivity on the phenoxy radical coupling reaction yielding optically active lignans from two molecules of coniferyl alcohol.
BnaC02G0323300ZS	M_WCS417_30m	M_Control	1620.18	730.27	1175.22	1.15049	0.129873	8.85859	8.10347e-19	6.9364e-17	Up	M_WCS417_30m-M_Control	RNA	AT1G80820	CCR2	Encodes an cinnamoyl CoA reductase isoform. Involved in lignin biosynthesis.
BnaA06G0279200ZS	M_WCS417_30m	M_Control	288.552	741.651	515.101	-1.3621	0.153992	-8.84524	9.13283e-19	7.80433e-17	Down	M_WCS417_30m-M_Control	RNA	AT5G62620	GALT6	Galactosyltransferase family protein
BnaC02G0423000ZS	M_WCS417_30m	M_Control	405.529	115.82	260.674	1.80499	0.204073	8.8448	9.16893e-19	7.822e-17	Up	M_WCS417_30m-M_Control	RNA	AT2G01150	RHA2B	Encodes a RING-H2 finger protein that is expressed in vascular tissue, root tips, embryos and pistils.
BnaC01G0106100ZS	M_WCS417_30m	M_Control	148.579	477.61	313.095	-1.68511	0.190537	-8.84401	9.23444e-19	7.86464e-17	Down	M_WCS417_30m-M_Control	RNA	AT5G47100	CBL9	member of AtCBLs (Calcineurin B-like Calcium Sensor Proteins. CBL9 interacts with and targets CIPK23 to the plasma membrane in vivo.
BnaC07G0530600ZS	M_WCS417_30m	M_Control	789.714	1666.9	1228.31	-1.07771	0.12194	-8.83804	9.74099e-19	8.28213e-17	Down	M_WCS417_30m-M_Control	RNA	AT4G36220	FAH1	encodes ferulate 5-hydroxylase (F5H). Involved in lignin biosynthesis.
BnaC01G0388900ZS	M_WCS417_30m	M_Control	376.602	106.879	241.741	1.81789	0.205808	8.83295	1.01946e-18	8.65332e-17	Up	M_WCS417_30m-M_Control	RNA	AT3G20340	--	Expression of the gene is downregulated in the presence of paraquat, an inducer of photoxidative stress.
BnaA04G0051600ZS	M_WCS417_30m	M_Control	164.445	504.667	334.556	-1.61689	0.183126	-8.8294	1.05243e-18	8.91823e-17	Down	M_WCS417_30m-M_Control	RNA	AT3G54000	--	--
BnaA01G0376000ZS	M_WCS417_30m	M_Control	207.943	637.13	422.536	-1.61393	0.182904	-8.82393	1.10509e-18	9.34877e-17	Down	M_WCS417_30m-M_Control	RNA	AT5G05300	IDL6	--
BnaC04G0579400ZS	M_WCS417_30m	M_Control	179.539	544.345	361.942	-1.60136	0.181596	-8.81825	1.16264e-18	9.81925e-17	Down	M_WCS417_30m-M_Control	RNA	AT2G41010	CAMBP25	Encodes a novel calmodulin binding protein whose gene expression is induced by dehydration and ionic (salt) and non-ionic (mannitol) osmotic stress. Lines over-expressing this gene are more sensitive and anti-sense lines are more tolerant to osmotic stress, suggesting this gene may be a negative regulator of response to osmotic stress.
BnaA09G0037400ZS	M_WCS417_30m	M_Control	866.172	1793.26	1329.71	-1.04982	0.119148	-8.81108	1.23944e-18	1.04505e-16	Down	M_WCS417_30m-M_Control	RNA	AT3G26980	MUB4	membrane-anchored ubiquitin-fold protein 4 precursor
BnaA06G0336300ZS	M_WCS417_30m	M_Control	597.01	1307.27	952.138	-1.13075	0.128362	-8.80905	1.2621e-18	1.06239e-16	Down	M_WCS417_30m-M_Control	RNA	AT5G25350	EBF2	Arabidopsis thaliana EIN3-binding F-box protein 2 (EBF2) mRNA. Part of the SCF complex, it is located in the nucleus and is involved in the ethylene-response pathway.
BnaC04G0329400ZS	M_WCS417_30m	M_Control	281.032	734.273	507.653	-1.38522	0.157408	-8.80018	1.36594e-18	1.14789e-16	Down	M_WCS417_30m-M_Control	RNA	AT3G54000	--	--
BnaA09G0131000ZS	M_WCS417_30m	M_Control	345.896	869.977	607.937	-1.3312	0.151353	-8.79535	1.42603e-18	1.1964e-16	Down	M_WCS417_30m-M_Control	RNA	AT1G63090	PP2-A11	phloem protein 2-A11
BnaC07G0128500ZS	M_WCS417_30m	M_Control	1582.76	735.76	1159.26	1.10557	0.125705	8.79494	1.43119e-18	1.19875e-16	Up	M_WCS417_30m-M_Control	RNA	AT1G30720	AtBBE10	FAD-binding Berberine family protein
BnaA01G0283300ZS	M_WCS417_30m	M_Control	426.404	130.224	278.314	1.70972	0.19462	8.78493	1.56458e-18	1.30831e-16	Up	M_WCS417_30m-M_Control	RNA	AT1G61820	BGLU46	beta glucosidase 46
BnaA04G0298800ZS	M_WCS417_30m	M_Control	632.551	1393.55	1013.05	-1.13919	0.129934	-8.76751	1.82662e-18	1.52491e-16	Down	M_WCS417_30m-M_Control	RNA	AT2G47520	HRE2	encodes a member of the ERF (ethylene response factor) subfamily B-2 of ERF/AP2 transcription factor family. The protein contains one AP2 domain. There are 5 members in this subfamily including RAP2.2 AND RAP2.12.
BnaA02G0320000ZS	M_WCS417_30m	M_Control	892.924	366.911	629.918	1.28225	0.14632	8.76329	1.8963e-18	1.58048e-16	Up	M_WCS417_30m-M_Control	RNA	AT2G02010	GAD4	glutamate decarboxylase 4
BnaA06G0143200ZS	M_WCS417_30m	M_Control	1013.28	2090.85	1552.06	-1.04533	0.119294	-8.76264	1.90722e-18	1.58697e-16	Down	M_WCS417_30m-M_Control	RNA	AT1G20330	SMT2	Encodes a sterol-C24-methyltransferases involved in sterol biosynthesis. Mutants display altered sterol composition, serrated petals and sepals and altered cotyledon vascular patterning as well as ectopic endoreduplication. This suggests that suppression of endoreduplication is important for petal morphogenesis and that normal sterol composition is required for this suppression.
BnaC04G0482800ZS	M_WCS417_30m	M_Control	268.035	56.6235	162.329	2.23872	0.255537	8.76082	1.93827e-18	1.61016e-16	Up	M_WCS417_30m-M_Control	RNA	AT2G28305	LOG1	Putative lysine decarboxylase family protein
BnaC06G0023900ZS	M_WCS417_30m	M_Control	616.821	1343.25	980.037	-1.12299	0.128201	-8.75957	1.95998e-18	1.62553e-16	Down	M_WCS417_30m-M_Control	RNA	AT1G47960	CIF1	Plant cell wall (CWI) and vacuolar invertases (VI) play important roles in carbohydrate metabolism, stress responses and sugar signaling. This protein may inhibit their activity.
BnaA02G0378700ZS	M_WCS417_30m	M_Control	989.374	426.019	707.696	1.2157	0.138895	8.75265	2.08409e-18	1.72551e-16	Up	M_WCS417_30m-M_Control	RNA	AT5G25930	NUT	Protein kinase family protein with leucine-rich repeat domain
BnaA04G0175400ZS	M_WCS417_30m	M_Control	1573.81	3126.01	2349.91	-0.989852	0.113094	-8.75247	2.08734e-18	1.72551e-16	Normal	M_WCS417_30m-M_Control	RNA	AT2G27080	NHL13	Late embryogenesis abundant (LEA) hydroxyproline-rich glycoprotein family
BnaC07G0071800ZS	M_WCS417_30m	M_Control	1541.14	728.437	1134.79	1.08098	0.123514	8.75195	2.09689e-18	1.73059e-16	Up	M_WCS417_30m-M_Control	RNA	AT2G15480	UGT73B5	UDP-glucosyl transferase 73B5
BnaC03G0256800ZS	M_WCS417_30m	M_Control	4095.06	2115.35	3105.21	0.952823	0.108924	8.7476	2.17929e-18	1.79567e-16	Normal	M_WCS417_30m-M_Control	RNA	AT2G44790	UCC2	Encodes a uclacyanin, a protein precursor that is closely related to precursors of stellacyanins and a blue copper protein from pea pods.
BnaC06G0076100ZS	M_WCS417_30m	M_Control	2251.05	1107.91	1679.48	1.0226	0.11691	8.74692	2.19246e-18	1.80358e-16	Up	M_WCS417_30m-M_Control	RNA	AT1G53210	NCL	Encodes a Na+/Ca 2+ exchanger-like protein that participates in the maintenance of Ca 2+ homeostasis.
BnaC03G0450500ZS	M_WCS417_30m	M_Control	67.0958	286.886	176.991	-2.09696	0.239758	-8.74614	2.20771e-18	1.81318e-16	Down	M_WCS417_30m-M_Control	RNA	AT3G21720	ICL	Encodes a glyoxylate cycle enzyme isocitrate lyase (ICL).
BnaC03G0807300ZS	M_WCS417_30m	M_Control	55.9316	259.99	157.961	-2.21745	0.253585	-8.74441	2.2419e-18	1.83736e-16	Down	M_WCS417_30m-M_Control	RNA	AT2G16005	ROSY1	MD-2-related lipid recognition domain-containing protein
BnaC01G0012100ZS	M_WCS417_30m	M_Control	358.966	99.3677	229.167	1.85265	0.21187	8.74428	2.2444e-18	1.83736e-16	Up	M_WCS417_30m-M_Control	RNA	AT4G38060	CCI2	--
BnaC06G0221700ZS	M_WCS417_30m	M_Control	2839.76	1441.93	2140.84	0.977905	0.111973	8.7334	2.47133e-18	2.01987e-16	Normal	M_WCS417_30m-M_Control	RNA	AT3G59970	MTHFR1	methylenetetrahydrofolate reductase MTHFR1 mRNA, complete
BnaA03G0284300ZS	M_WCS417_30m	M_Control	193.888	556.607	375.247	-1.52092	0.174226	-8.72959	2.55594e-18	2.08566e-16	Down	M_WCS417_30m-M_Control	RNA	AT5G15140	PEG9	Galactose mutarotase-like superfamily protein
BnaA06G0416500ZS	M_WCS417_30m	M_Control	2596.51	1302.97	1949.74	0.994434	0.113993	8.72368	2.69315e-18	2.19409e-16	Normal	M_WCS417_30m-M_Control	RNA	AT5G47450	TIP2;3	Tonoplast intrinsic protein, transports ammonium (NH3) and methylammonium across the tonoplast membrane, gene expression shows diurnal regulation and is upregulated by ammonium (NH3).
BnaC04G0600000ZS	M_WCS417_30m	M_Control	1267.16	556.842	912.001	1.18533	0.135989	8.71633	2.87368e-18	2.33615e-16	Up	M_WCS417_30m-M_Control	RNA	AT2G44450	BGLU15	beta glucosidase 15
BnaC01G0362000ZS	M_WCS417_30m	M_Control	1582.54	3172.1	2377.32	-1.00325	0.115101	-8.71621	2.87673e-18	2.33615e-16	Down	M_WCS417_30m-M_Control	RNA	AT3G23250	MYB15	Member of the R2R3 factor gene family.
BnaA09G0653000ZS	M_WCS417_30m	M_Control	1431.96	662.446	1047.2	1.11192	0.127691	8.70792	3.09489e-18	2.50528e-16	Up	M_WCS417_30m-M_Control	RNA	AT1G11580	PMEPCRA	methylesterase PCR A
BnaC04G0486900ZS	M_WCS417_30m	M_Control	2426.92	4557	3491.96	-0.908985	0.104422	-8.70495	3.1772e-18	2.56781e-16	Normal	M_WCS417_30m-M_Control	RNA	AT2G28720	HTB3	Histone superfamily protein
BnaC08G0344400ZS	M_WCS417_30m	M_Control	710.687	257.313	484	1.46532	0.168444	8.69912	3.34477e-18	2.69893e-16	Up	M_WCS417_30m-M_Control	RNA	AT3G54420	EP3	encodes an EP3 chitinase that is expressed during somatic embryogenesis in 'nursing' cells surrounding the embryos but not in embryos themselves. The gene is also expressed in mature pollen and growing pollen tubes until they enter the receptive synergid, but not in endosperm and integuments as in carrot. Post-embryonically, expression is found in hydathodes, stipules, root epidermis and emerging…
BnaA03G0073800ZS	M_WCS417_30m	M_Control	634.552	237.254	435.903	1.41838	0.163176	8.69234	3.55059e-18	2.86045e-16	Up	M_WCS417_30m-M_Control	RNA	AT5G17330	GAD1	Encodes one of two isoforms of glutamate decarboxylase.
BnaC08G0255600ZS	M_WCS417_30m	M_Control	4529.3	8225.31	6377.3	-0.860781	0.0990494	-8.69043	3.61078e-18	2.90433e-16	Normal	M_WCS417_30m-M_Control	RNA	AT1G19800	TGD1	Encodes a permease-like protein involved in lipid transfer from the ER to the chloroplast, more specifically, transfer of phosphatidate across the chloroplast inner membrane. Mutant leaves accumulate trigalactosyldiacylglycerol, triacylglycerol and phosphatidate. Chloroplast lipids are altered in their fatty acid composition and as a consequence the development of chloroplasts in the mutants are …
BnaA09G0716600ZS	M_WCS417_30m	M_Control	289.489	734.295	511.892	-1.34295	0.154686	-8.68176	3.8969e-18	3.1295e-16	Down	M_WCS417_30m-M_Control	RNA	AT1G01490	AtHMP01	Heavy metal transport/detoxification superfamily protein
BnaA03G0200500ZS	M_WCS417_30m	M_Control	2133.74	1067.69	1600.71	0.99889	0.115131	8.67611	4.09526e-18	3.28359e-16	Normal	M_WCS417_30m-M_Control	RNA	AT2G40890	REF8	encodes coumarate 3-hydroxylase (C3H), a P450-dependent monooxygenase. Involved in lignin biosynthesis and flavonoid biosynthesis. Also affects the biosynthesis of coumarins such as scopoletin and scopolin as a branching-out-pathway from the phenylpropanoid acid level.
BnaA01G0291900ZS	M_WCS417_30m	M_Control	1066.97	2155.43	1611.2	-1.01464	0.116964	-8.67479	4.1431e-18	3.3167e-16	Down	M_WCS417_30m-M_Control	RNA	AT3G23430	PHO1	mutant is deficient in the transfer of phosphate from root epidermal and cortical cells to the xylem. encodes protein with the mainly hydrophilic N-terminal and the C-terminal containing 6 potential membrane-spanning domains.
BnaC03G0345800ZS	M_WCS417_30m	M_Control	80.7771	315.481	198.129	-1.96603	0.226691	-8.67272	4.21916e-18	3.37227e-16	Down	M_WCS417_30m-M_Control	RNA	AT3G02480	ABR	Late embryogenesis abundant protein (LEA) family protein
BnaA02G0280400ZS	M_WCS417_30m	M_Control	1268.37	565.226	916.8	1.16513	0.134646	8.65327	5.00425e-18	3.99347e-16	Up	M_WCS417_30m-M_Control	RNA	AT5G42830	--	HXXXD-type acyl-transferase family protein
BnaC07G0481600ZS	M_WCS417_30m	M_Control	287.583	69.4367	178.51	2.05244	0.237222	8.65199	5.06079e-18	4.03224e-16	Up	M_WCS417_30m-M_Control	RNA	AT4G28240	WIP1	Wound-responsive family protein
BnaC01G0010600ZS	M_WCS417_30m	M_Control	4496.59	2411.9	3454.25	0.898718	0.103908	8.64913	5.18926e-18	4.12811e-16	Normal	M_WCS417_30m-M_Control	RNA	AT4G39980	DHS1	Encodes a 2-deoxy-D-arabino-heptulosonate 7-phosphate (DAHP) synthase, which catalyzes the first committed step in aromatic amino acid biosynthesis. Gene expression is induced by wounding and pathogenic bacteria Pseudomonas syringae.
Bnascaffold0026G0024100ZS	M_WCS417_30m	M_Control	1110.73	404.838	757.782	1.4537	0.168127	8.64648	5.3113e-18	4.21857e-16	Up	M_WCS417_30m-M_Control	RNA	AT5G10550	GTE2	This gene is predicted to encode a bromodomain-containing protein. A plant line expressing RNAi constructs targeted against GTE7 shows some resistance to agrobacterium-mediated root transformation.
BnaA08G0250600ZS	M_WCS417_30m	M_Control	2765.56	5152.45	3959.01	-0.897613	0.103872	-8.64151	5.54747e-18	4.39925e-16	Normal	M_WCS417_30m-M_Control	RNA	AT1G19770	PUP14	Member of a family of proteins related to PUP1, a purine transporter. May be involved in the transport of purine and purine derivatives such as cytokinins, across the plasma membrane.
BnaA03G0340700ZS	M_WCS417_30m	M_Control	689.363	1472.31	1080.84	-1.09496	0.126822	-8.63383	5.93309e-18	4.68308e-16	Down	M_WCS417_30m-M_Control	RNA	AT3G15210	RAP2.5	Encodes a member of the ERF (ethylene response factor) subfamily B-1 of ERF/AP2 transcription factor family (ATERF-4). The protein contains one AP2 domain. Acts as a negative regulator of JA-responsive defense gene expression and resistance to the necrotrophic fungal pathogen Fusarium oxysporum and antagonizes JA inhibition of root elongation.
BnaA10G0249100ZS	M_WCS417_30m	M_Control	1717.83	832.79	1275.31	1.04435	0.120993	8.6315	6.05505e-18	4.7719e-16	Up	M_WCS417_30m-M_Control	RNA	AT5G64260	EXL2	EXORDIUM like 2
BnaC01G0393900ZS	M_WCS417_30m	M_Control	602.481	1300.28	951.38	-1.10971	0.128592	-8.62967	6.15292e-18	4.84151e-16	Down	M_WCS417_30m-M_Control	RNA	AT3G19680	--	Protein of unknown function (DUF1005)
BnaA03G0200900ZS	M_WCS417_30m	M_Control	2398.37	1211.12	1804.74	0.985495	0.114253	8.62554	6.37887e-18	5.01151e-16	Normal	M_WCS417_30m-M_Control	RNA	AT2G27030	CAM5	encodes a calmodulin that has higher affinity to kinesin-like calmodulin binding motor protein than CAM4 or CAM6.
BnaA10G0152400ZS	M_WCS417_30m	M_Control	86.5334	333.279	209.906	-1.94682	0.225783	-8.62251	6.54996e-18	5.13797e-16	Down	M_WCS417_30m-M_Control	RNA	AT1G53540	HSP17.6C	HSP20-like chaperones superfamily protein
BnaA09G0612100ZS	M_WCS417_30m	M_Control	499.414	1141.43	820.425	-1.19298	0.13853	-8.61176	7.19459e-18	5.63491e-16	Down	M_WCS417_30m-M_Control	RNA	AT1G18740	B1L	Protein of unknown function (DUF793)
BnaC09G0050400ZS	M_WCS417_30m	M_Control	61.6088	276.084	168.846	-2.16582	0.251739	-8.60341	7.73818e-18	6.05131e-16	Down	M_WCS417_30m-M_Control	RNA	AT5G26200	--	Mitochondrial substrate carrier family protein
BnaA01G0326400ZS	M_WCS417_30m	M_Control	685.101	267.86	476.481	1.35473	0.157631	8.59427	8.37978e-18	6.54295e-16	Up	M_WCS417_30m-M_Control	RNA	AT3G18560	--	--
BnaA04G0163100ZS	M_WCS417_30m	M_Control	1903.15	928.528	1415.84	1.03561	0.120511	8.59351	8.43543e-18	6.57626e-16	Up	M_WCS417_30m-M_Control	RNA	AT2G24570	WRKY17	member of WRKY Transcription Factor; Group II-d; negative regulator of basal resistance to Pseudomonas syringae.
BnaA05G0140100ZS	M_WCS417_30m	M_Control	2452.48	1248.69	1850.59	0.973983	0.113497	8.58159	9.35728e-18	7.28373e-16	Normal	M_WCS417_30m-M_Control	RNA	AT2G29500	HSP17.6B	HSP20-like chaperones superfamily protein
BnaC04G0476800ZS	M_WCS417_30m	M_Control	2111.04	1052.16	1581.6	1.00458	0.117089	8.5796	9.52069e-18	7.39956e-16	Up	M_WCS417_30m-M_Control	RNA	AT3G57020	--	Calcium-dependent phosphotriesterase superfamily protein
BnaC09G0300000ZS	M_WCS417_30m	M_Control	239.425	50.2504	144.838	2.25312	0.262855	8.5717	1.01964e-17	7.9126e-16	Up	M_WCS417_30m-M_Control	RNA	AT4G10720	--	Ankyrin repeat family protein
BnaA09G0091000ZS	M_WCS417_30m	M_Control	1686.07	3216.77	2451.42	-0.931863	0.108935	-8.55432	1.18567e-17	9.18698e-16	Normal	M_WCS417_30m-M_Control	RNA	AT5G65300	SUPA	--
BnaA09G0635500ZS	M_WCS417_30m	M_Control	957.151	410.992	684.071	1.21897	0.142522	8.55286	1.20072e-17	9.28939e-16	Up	M_WCS417_30m-M_Control	RNA	AT1G14200	USR1	RING/U-box superfamily protein
BnaC03G0524400ZS	M_WCS417_30m	M_Control	313.144	802.946	558.045	-1.35753	0.158886	-8.54409	1.29553e-17	1.00076e-15	Down	M_WCS417_30m-M_Control	RNA	AT5G65207	--	--
BnaA10G0131000ZS	M_WCS417_30m	M_Control	596.899	224.555	410.727	1.41032	0.16519	8.53757	1.37073e-17	1.05724e-15	Up	M_WCS417_30m-M_Control	RNA	AT5G57220	CYP81F2	member of CYP81F, involved in glucosinolate metabolism. Mutants had impaired resistance to fungi.
BnaA06G0410700ZS	M_WCS417_30m	M_Control	1633.76	792.208	1212.99	1.04391	0.122401	8.52863	1.48085e-17	1.14043e-15	Up	M_WCS417_30m-M_Control	RNA	AT2G01450	MPK17	member of MAP Kinase
BnaA01G0338800ZS	M_WCS417_30m	M_Control	684.253	1466.35	1075.3	-1.09934	0.12907	-8.51743	1.63134e-17	1.25443e-15	Down	M_WCS417_30m-M_Control	RNA	AT3G16860	COBL8	COBRA-like protein 8 precursor
BnaA08G0247900ZS	M_WCS417_30m	M_Control	533.4	1164.28	848.838	-1.1262	0.132275	-8.51408	1.67922e-17	1.28928e-15	Down	M_WCS417_30m-M_Control	RNA	AT1G20340	PETE2	recombination and DNA-damage resistance protein (DRT112) One of two Arabidopsis plastocyanin genes. Predominant form, expressed 10x higher than PETE1. PETE2 is thought to be post-transcriptionally regulated via copper accumulation and is involved in copper homeostasis. Mutation of this gene does not have obvious effect on photosynthesis. In plsp1-1 mutant plastids, the nonmature form of the prote…
BnaC03G0344200ZS	M_WCS417_30m	M_Control	227.07	45.619	136.344	2.31267	0.271715	8.51138	1.71879e-17	1.31767e-15	Up	M_WCS417_30m-M_Control	RNA	AT3G02140	TMAC2	Encodes a protein that acts in the nucleus and is an important negative regulator of ABA and salt stress responses, and could play a critical role in controlling root elongation, floral initiation and starch degradation.
BnaC02G0021300ZS	M_WCS417_30m	M_Control	381.285	103.89	242.588	1.87357	0.220245	8.50678	1.7883e-17	1.36889e-15	Up	M_WCS417_30m-M_Control	RNA	AT5G05600	JOX2	2-oxoglutarate (2OG) and Fe(II)-dependent oxygenase superfamily protein
BnaA03G0257700ZS	M_WCS417_30m	M_Control	430.954	140.36	285.657	1.61846	0.190305	8.50457	1.82273e-17	1.39314e-15	Up	M_WCS417_30m-M_Control	RNA	AT4G11360	RHA1B	Encodes a putative RING-H2 finger protein RHA1b.
BnaC03G0773700ZS	M_WCS417_30m	M_Control	1146.8	503.227	825.012	1.18868	0.139809	8.50219	1.86049e-17	1.41986e-15	Up	M_WCS417_30m-M_Control	RNA	AT4G30270	XTH24	encodes a protein similar to endo xyloglucan transferase in sequence. It is also very similar to BRU1 in soybean, which is involved in brassinosteroid response.
BnaA07G0269500ZS	M_WCS417_30m	M_Control	621.15	1331.93	976.541	-1.10064	0.129493	-8.49958	1.90286e-17	1.45001e-15	Down	M_WCS417_30m-M_Control	RNA	AT1G69890	DUF569	Protein of unknown function (DUF569)
BnaC04G0527100ZS	M_WCS417_30m	M_Control	1501.21	2858.64	2179.92	-0.929176	0.109381	-8.49482	1.9824e-17	1.50835e-15	Normal	M_WCS417_30m-M_Control	RNA	AT2G33580	LYK5	Encodes a LysM-containing receptor-like kinase. Induction of chitin-responsive genes by chitin treatment is not blocked in the mutant.
BnaA01G0306600ZS	M_WCS417_30m	M_Control	421.68	974.523	698.101	-1.20894	0.14232	-8.49451	1.98767e-17	1.51009e-15	Down	M_WCS417_30m-M_Control	RNA	AT3G21510	AHP1	Encodes AHP1, one of the six Arabidopsis thaliana histidine phosphotransfer proteins (AHPs). AHPs function as redundant positive regulators of cytokinin signaling. Members of the AHP gene family include: AT3G21510 (AHP1), AT3G29350 (AHP2), AT5G39340 (AHP3), AT3G16360 (AHP4), AT1G03430 (AHP5) and AT1G80100 (AHP6).
BnaA09G0227300ZS	M_WCS417_30m	M_Control	522.205	1149.8	836.001	-1.1384	0.134042	-8.49288	2.01577e-17	1.52686e-15	Down	M_WCS417_30m-M_Control	RNA	AT3G25600	CML16	Calcium-binding EF-hand family protein
BnaC03G0029700ZS	M_WCS417_30m	M_Control	262.222	61.4109	161.816	2.09436	0.246664	8.49072	2.05356e-17	1.55317e-15	Up	M_WCS417_30m-M_Control	RNA	AT5G06570	--	alpha/beta-Hydrolases superfamily protein
BnaA02G0110300ZS	M_WCS417_30m	M_Control	964.316	1937.46	1450.89	-1.00653	0.118748	-8.47614	2.32798e-17	1.7581e-15	Down	M_WCS417_30m-M_Control	RNA	AT5G58430	EXO70B1	A member of EXO70 gene family, putative exocyst subunits, conserved in land plants. Arabidopsis thaliana contains 23 putative EXO70 genes, which can be classified into eight clusters on the phylogenetic tree.
BnaC02G0014900ZS	M_WCS417_30m	M_Control	4.04961	134.294	69.1718	-5.04645	0.595631	-8.47245	2.40279e-17	1.81189e-15	Down	M_WCS417_30m-M_Control	RNA	AT5G04120	--	Encodes a cofactor-dependent phosphoglycerate mutase (dPGM) - like protein with phosphoserine phosphatase activity that may be responsible for serine anabolism.
BnaA05G0414700ZS	M_WCS417_30m	M_Control	375.801	112.436	244.118	1.74274	0.205738	8.47067	2.43986e-17	1.83711e-15	Up	M_WCS417_30m-M_Control	RNA	AT3G13650	--	Disease resistance-responsive (dirigent-like protein) family protein
BnaC09G0247600ZS	M_WCS417_30m	M_Control	125.608	408.107	266.857	-1.70111	0.200898	-8.46755	2.50615e-17	1.88422e-15	Down	M_WCS417_30m-M_Control	RNA	AT5G47220	ERF2	Encodes a member of the ERF (ethylene response factor) subfamily B-3 of ERF/AP2 transcription factor family (ATERF-2). The protein contains one AP2 domain. Functions as activator of GCC box鈥揹ependent transcription. Positive regulator of JA-responsive defense genes and resistance to F. oxysporum and enhances JA inhibition of root elongation.
BnaA03G0498300ZS	M_WCS417_30m	M_Control	457.895	154.608	306.252	1.56682	0.185159	8.46203	2.62756e-17	1.97257e-15	Up	M_WCS417_30m-M_Control	RNA	AT4G27520	ENODL2	early nodulin-like protein 2
BnaC08G0436100ZS	M_WCS417_30m	M_Control	1316.89	612.394	964.642	1.10393	0.130515	8.4583	2.71309e-17	2.03377e-15	Up	M_WCS417_30m-M_Control	RNA	AT2G23960	--	Class I glutamine amidotransferase-like superfamily protein
BnaC08G0157200ZS	M_WCS417_30m	M_Control	209.776	39.6046	124.69	2.40771	0.284755	8.45536	2.7822e-17	2.0825e-15	Up	M_WCS417_30m-M_Control	RNA	AT4G18195	PUP8	Member of a family of proteins related to PUP1, a purine transporter. May be involved in the transport of purine and purine derivatives such as cytokinins, across the plasma membrane.
BnaA02G0351200ZS	M_WCS417_30m	M_Control	1417.06	2754.67	2085.86	-0.958923	0.11342	-8.45466	2.79913e-17	2.09208e-15	Normal	M_WCS417_30m-M_Control	RNA	AT5G39670	CML46	Calcium-binding EF-hand family protein
BnaA05G0154200ZS	M_WCS417_30m	M_Control	3485.19	1856.24	2670.71	0.908714	0.107495	8.45356	2.82543e-17	2.10863e-15	Normal	M_WCS417_30m-M_Control	RNA	AT1G55450	--	S-adenosyl-L-methionine-dependent methyltransferases superfamily protein
BnaC06G0456800ZS	M_WCS417_30m	M_Control	1825.51	888.785	1357.15	1.0378	0.122917	8.44304	3.09176e-17	2.304e-15	Up	M_WCS417_30m-M_Control	RNA	AT1G15690	VHP1	Encodes a H(+)-translocating (pyrophosphate-energized) inorganic pyrophosphatase (H(+)-PPase; EC 3.6.1.1) located in the vacuolar membrane. Expression is found in all tissues examined, including meristems and floral organ primordium. Expression is particularly enhanced in pollen, and is repressed by light. Over expression and loss of function phenotypes suggest AVP1 is involved in regulation of a…
BnaA02G0292400ZS	M_WCS417_30m	M_Control	7917.1	4439.39	6178.25	0.834575	0.0988576	8.44219	3.11456e-17	2.31758e-15	Normal	M_WCS417_30m-M_Control	RNA	AT5G45280	PAE11	Pectinacetylesterase family protein
BnaA01G0040400ZS	M_WCS417_30m	M_Control	488.823	1087.32	788.07	-1.15374	0.136784	-8.43475	3.31924e-17	2.46626e-15	Down	M_WCS417_30m-M_Control	RNA	AT4G34140	--	D111/G-patch domain-containing protein
BnaA09G0584700ZS	M_WCS417_30m	M_Control	904.636	381.051	642.843	1.24615	0.147826	8.42988	3.46034e-17	2.56734e-15	Up	M_WCS417_30m-M_Control	RNA	AT2G23960	--	Class I glutamine amidotransferase-like superfamily protein
BnaA09G0159000ZS	M_WCS417_30m	M_Control	1579.13	2979.45	2279.29	-0.915915	0.108667	-8.42862	3.49753e-17	2.59114e-15	Normal	M_WCS417_30m-M_Control	RNA	AT1G61890	--	MATE efflux family protein
BnaC07G0414100ZS	M_WCS417_30m	M_Control	390.673	113.933	252.303	1.78176	0.21156	8.42201	3.70069e-17	2.73765e-15	Up	M_WCS417_30m-M_Control	RNA	AT4G17215	--	Pollen Ole e 1 allergen and extensin family protein
BnaA03G0434100ZS	M_WCS417_30m	M_Control	169.843	23.1472	96.4954	2.88387	0.342535	8.4192	3.79051e-17	2.8e-15	Up	M_WCS417_30m-M_Control	RNA	AT4G16447	--	--
BnaA02G0271600ZS	M_WCS417_30m	M_Control	309.785	752.509	531.147	-1.28035	0.152103	-8.41762	3.8421e-17	2.83398e-15	Down	M_WCS417_30m-M_Control	RNA	AT4G10310	HKT1;1	encodes a sodium transporter (HKT1) expressed in xylem parenchyma cells. Mutants over-accumulate sodium in shoot tissue and have increased sodium in the xylem sap and reduced sodium in phloem sap and roots.
BnaA10G0250600ZS	M_WCS417_30m	M_Control	1938.29	3716.68	2827.48	-0.939417	0.111707	-8.40963	4.11297e-17	3.02937e-15	Normal	M_WCS417_30m-M_Control	RNA	AT5G08790	ATAF2	induced by wounding, belongs to a large family of putative transcriptional activators with NAC domain.
BnaC06G0001700ZS	M_WCS417_30m	M_Control	268.152	57.9595	163.056	2.20424	0.262209	8.40644	4.22633e-17	3.10834e-15	Up	M_WCS417_30m-M_Control	RNA	AT4G28420	--	Tyrosine transaminase family protein
BnaA09G0084700ZS	M_WCS417_30m	M_Control	368.876	859.43	614.153	-1.22048	0.145319	-8.39863	4.51703e-17	3.31733e-15	Down	M_WCS417_30m-M_Control	RNA	AT5G63530	FP3	Farnesylated protein that binds metals.
BnaC07G0383600ZS	M_WCS417_30m	M_Control	571.56	1248.96	910.259	-1.12781	0.13442	-8.39022	4.85248e-17	3.55715e-15	Down	M_WCS417_30m-M_Control	RNA	AT5G61600	ERF104	encodes a member of the ERF (ethylene response factor) subfamily B-3 of ERF/AP2 transcription factor family. The protein contains one AP2 domain. There are 18 members in this subfamily including ATERF-1, ATERF-2, AND ATERF-5.
BnaA04G0207600ZS	M_WCS417_30m	M_Control	776.881	1616.25	1196.57	-1.05723	0.12601	-8.39009	4.85762e-17	3.55715e-15	Down	M_WCS417_30m-M_Control	RNA	AT2G31880	SOBIR1	Encodes a putative leucine rich repeat transmembrane protein that is expressed in response to Pseudomonas syringae. Expression of SRRLK may be required for silencing via lsiRNAs. Regulates cell death and innate immunity.
BnaC03G0281000ZS	M_WCS417_30m	M_Control	551.448	204.344	377.896	1.43256	0.170902	8.38233	5.18885e-17	3.79422e-15	Up	M_WCS417_30m-M_Control	RNA	AT2G24850	TAT3	Encodes a tyrosine aminotransferase that is responsive to treatment with jasmonic acid.
BnaC06G0448600ZS	M_WCS417_30m	M_Control	1172.86	517.029	844.945	1.1805	0.140844	8.38162	5.2202e-17	3.81165e-15	Up	M_WCS417_30m-M_Control	RNA	AT5G17680	--	disease resistance protein (TIR-NBS-LRR class), putative
BnaC01G0020200ZS	M_WCS417_30m	M_Control	3095.43	1637.29	2366.36	0.918649	0.109719	8.37277	5.62805e-17	4.10354e-15	Normal	M_WCS417_30m-M_Control	RNA	AT4G36990	TBF1	Encodes a protein whose sequence is similar to heat shock factors that regulate the expression of heat shock proteins. Transcript level is increased in response to heat shock. However, overexpression of this gene did not result in the increase of decrease of heat shock proteins.
BnaC08G0264200ZS	M_WCS417_30m	M_Control	579.764	216.628	398.196	1.41887	0.169531	8.36943	5.78976e-17	4.21538e-15	Up	M_WCS417_30m-M_Control	RNA	AT1G21100	IGMT1	O-methyltransferase family protein
BnaA08G0164500ZS	M_WCS417_30m	M_Control	279	69.078	174.039	2.01726	0.241392	8.35678	6.4452e-17	4.68585e-15	Up	M_WCS417_30m-M_Control	RNA	AT4G28240	WIP1	Wound-responsive family protein
BnaC08G0259500ZS	M_WCS417_30m	M_Control	969.68	1970.41	1470.04	-1.02324	0.122452	-8.35624	6.47508e-17	4.70083e-15	Down	M_WCS417_30m-M_Control	RNA	AT1G20340	PETE2	recombination and DNA-damage resistance protein (DRT112) One of two Arabidopsis plastocyanin genes. Predominant form, expressed 10x higher than PETE1. PETE2 is thought to be post-transcriptionally regulated via copper accumulation and is involved in copper homeostasis. Mutation of this gene does not have obvious effect on photosynthesis. In plsp1-1 mutant plastids, the nonmature form of the prote…
BnaC07G0469700ZS	M_WCS417_30m	M_Control	190.148	30.0349	110.092	2.65849	0.318367	8.3504	6.80293e-17	4.93178e-15	Up	M_WCS417_30m-M_Control	RNA	AT4G26260	MIOX4	Encodes a myo-inositol oxygenase.
BnaC06G0398700ZS	M_WCS417_30m	M_Control	884.236	1790.98	1337.61	-1.01806	0.121964	-8.34715	6.9929e-17	5.06226e-15	Down	M_WCS417_30m-M_Control	RNA	AT1G73540	NUDT21	nudix hydrolase homolog 21
BnaA01G0293200ZS	M_WCS417_30m	M_Control	908.771	1813.36	1361.07	-0.996779	0.119446	-8.34502	7.11993e-17	5.14686e-15	Normal	M_WCS417_30m-M_Control	RNA	AT3G23250	MYB15	Member of the R2R3 factor gene family.
BnaC07G0336200ZS	M_WCS417_30m	M_Control	1052.39	458.159	755.273	1.19936	0.143788	8.34112	7.35897e-17	5.31208e-15	Up	M_WCS417_30m-M_Control	RNA	AT5G49450	bZIP1	Encodes a transcription activator is a positive regulator of plant tolerance to salt, osmotic and drought stresses.
BnaC09G0444500ZS	M_WCS417_30m	M_Control	135.724	416.558	276.141	-1.61788	0.194028	-8.33841	7.52965e-17	5.42756e-15	Down	M_WCS417_30m-M_Control	RNA	AT5G22890	STOP2	An unique homologue of STOP1 (AT1G34370) in Arabidopsis genome. Transformation to the stop1-mutant activated several genes that are regulated by STOP1, and conferred proton sensitive phenotype.
BnaA10G0260500ZS	M_WCS417_30m	M_Control	32.5553	193.07	112.813	-2.57008	0.308276	-8.33696	7.62264e-17	5.48679e-15	Down	M_WCS417_30m-M_Control	RNA	AT5G07240	IQD24	IQ-domain 24
BnaA06G0053900ZS	M_WCS417_30m	M_Control	386.687	114.395	250.541	1.76095	0.211314	8.33333	7.86009e-17	5.64967e-15	Up	M_WCS417_30m-M_Control	RNA	AT1G08940	--	Phosphoglycerate mutase family protein
BnaC01G0320700ZS	M_WCS417_30m	M_Control	146.872	16.4054	81.6389	3.15347	0.378624	8.32875	8.17031e-17	5.86434e-15	Up	M_WCS417_30m-M_Control	RNA	AT5G15000	--	Encodes a ECA1 gametogenesis related family protein
BnaC07G0022900ZS	M_WCS417_30m	M_Control	537.172	1156.84	847.004	-1.10667	0.132893	-8.32752	8.25517e-17	5.91687e-15	Down	M_WCS417_30m-M_Control	RNA	AT2G19710	ISTL5	Regulator of Vps4 activity in the MVB pathway protein
BnaC03G0607300ZS	M_WCS417_30m	M_Control	331.916	82.4997	207.208	2.00984	0.241549	8.32062	8.75034e-17	6.26292e-15	Up	M_WCS417_30m-M_Control	RNA	AT3G46130	MYB48	Encodes a putative transcription factor (MYB48) that functions to regulate flavonol biosynthesis primarily in cotyledons.
BnaC07G0208700ZS	M_WCS417_30m	M_Control	192.776	540.149	366.463	-1.48567	0.178758	-8.31107	9.48402e-17	6.77847e-15	Down	M_WCS417_30m-M_Control	RNA	AT5G66985	HUP44	--
BnaC06G0437700ZS	M_WCS417_30m	M_Control	1724.25	866.021	1295.13	0.99342	0.119588	8.30702	9.81346e-17	7.00405e-15	Normal	M_WCS417_30m-M_Control	RNA	AT1G78080	WIND1	Encodes a member of the DREB subfamily A-6 of ERF/AP2 transcription factor family (RAP2.4). The protein contains one AP2 domain. Role in mediating light and ethylene signaling.
BnaA07G0080700ZS	M_WCS417_30m	M_Control	709.589	1471.93	1090.76	-1.05234	0.126708	-8.30523	9.96296e-17	7.10074e-15	Down	M_WCS417_30m-M_Control	RNA	AT3G23170	PRP	--
BnaC01G0437000ZS	M_WCS417_30m	M_Control	734.878	305.251	520.064	1.26714	0.15274	8.29605	1.07635e-16	7.66049e-15	Up	M_WCS417_30m-M_Control	RNA	AT3G14690	CYP72A15	putative cytochrome P450
BnaA01G0070700ZS	M_WCS417_30m	M_Control	1183.05	556.248	869.647	1.08883	0.131414	8.28546	1.17655e-16	8.36191e-15	Up	M_WCS417_30m-M_Control	RNA	AT4G30270	XTH24	encodes a protein similar to endo xyloglucan transferase in sequence. It is also very similar to BRU1 in soybean, which is involved in brassinosteroid response.
BnaA01G0042800ZS	M_WCS417_30m	M_Control	444.223	143.901	294.062	1.62371	0.196247	8.27379	1.29763e-16	9.20954e-15	Up	M_WCS417_30m-M_Control	RNA	AT4G33770	ITPK2	Inositol 1,3,4-trisphosphate 5/6-kinase family protein
BnaA08G0138300ZS	M_WCS417_30m	M_Control	11247	6444.15	8845.58	0.803468	0.097163	8.26928	1.34772e-16	9.55165e-15	Normal	M_WCS417_30m-M_Control	RNA	AT4G34050	CCoAOMT1	S-adenosyl-L-methionine-dependent methyltransferases superfamily protein
BnaA03G0100800ZS	M_WCS417_30m	M_Control	847.333	1790.65	1318.99	-1.07938	0.130682	-8.25957	1.46201e-16	1.03472e-14	Down	M_WCS417_30m-M_Control	RNA	AT5G59820	ZAT12	Encodes a zinc finger protein involved in high light and cold acclimation. Overexpression of this putative transcription factor increases the expression level of 9 cold-responsive genes and represses the expression level of 15 cold-responsive genes, including CBF genes. Also, lines overexpressing this gene exhibits a small but reproducible increase in freeze tolerance. Because of the repression o…
BnaA03G0553400ZS	M_WCS417_30m	M_Control	2046.52	1039.65	1543.09	0.976813	0.118275	8.25882	1.47114e-16	1.03973e-14	Normal	M_WCS417_30m-M_Control	RNA	AT4G36040	J11	Chaperone DnaJ-domain superfamily protein
BnaC02G0439200ZS	M_WCS417_30m	M_Control	534.17	183.344	358.757	1.53968	0.186458	8.25748	1.48775e-16	1.05e-14	Up	M_WCS417_30m-M_Control	RNA	AT2G02990	RNS1	member of the ribonuclease T2 family, responds to inorganic phosphate starvation, and inhibits production of anthocyanin. Also involved in wound-induced signaling independent of jasmonic acid.
BnaA04G0288800ZS	M_WCS417_30m	M_Control	145.039	445.762	295.4	-1.61919	0.196177	-8.25374	1.53519e-16	1.08198e-14	Down	M_WCS417_30m-M_Control	RNA	AT2G45760	BAP2	encodes a protein that is similar to BONZAI1-binding protein BAP1.
BnaA03G0125800ZS	M_WCS417_30m	M_Control	1585.32	771.332	1178.32	1.03912	0.125939	8.25095	1.57146e-16	1.106e-14	Up	M_WCS417_30m-M_Control	RNA	AT4G27270	--	Quinone reductase family protein
BnaA01G0294600ZS	M_WCS417_30m	M_Control	324.467	776.104	550.285	-1.25832	0.152539	-8.2492	1.59465e-16	1.12076e-14	Down	M_WCS417_30m-M_Control	RNA	AT3G23150	ETR2	Involved in ethylene perception in Arabidopsis
BnaA09G0418600ZS	M_WCS417_30m	M_Control	709.184	287.057	498.12	1.30621	0.158366	8.24806	1.60982e-16	1.12986e-14	Up	M_WCS417_30m-M_Control	RNA	AT1G29280	WRKY65	member of WRKY Transcription Factor; Group II-e
BnaA03G0248800ZS	M_WCS417_30m	M_Control	1443.9	682.479	1063.19	1.08166	0.131166	8.24648	1.63125e-16	1.14332e-14	Up	M_WCS417_30m-M_Control	RNA	AT4G08850	MIK2	Leucine-rich repeat receptor-like protein kinase family protein
BnaA06G0354300ZS	M_WCS417_30m	M_Control	246.739	56.7794	151.759	2.11711	0.2569	8.24099	1.70789e-16	1.19538e-14	Up	M_WCS417_30m-M_Control	RNA	AT5G28770	BZO2H3	bZIP protein BZO2H3 mRNA, partial cds
BnaC02G0106800ZS	M_WCS417_30m	M_Control	496.834	165.036	330.935	1.5869	0.192598	8.23945	1.73011e-16	1.20927e-14	Up	M_WCS417_30m-M_Control	RNA	AT5G21170	KINbeta1	Encodes AKINbeta1, a subunit of the SnRK1 kinase (Sucrose non-fermenting-1-related protein kinase). Involved in regulation of nitrogen and sugar metabolism.
BnaA08G0235200ZS	M_WCS417_30m	M_Control	900.26	399.534	649.897	1.17244	0.142358	8.23582	1.78326e-16	1.2447e-14	Up	M_WCS417_30m-M_Control	RNA	AT1G23800	ALDH2B7	Encodes a mitochondrial aldehyde dehydrogenase; nuclear gene for mitochondrial product.
BnaC04G0130100ZS	M_WCS417_30m	M_Control	280.659	68.3085	174.484	2.04357	0.248169	8.23458	1.8019e-16	1.25598e-14	Up	M_WCS417_30m-M_Control	RNA	AT2G34000	ATL99	RING/U-box superfamily protein
BnaA05G0071200ZS	M_WCS417_30m	M_Control	1887.61	3522.11	2704.86	-0.899963	0.109371	-8.22854	1.89513e-16	1.31915e-14	Normal	M_WCS417_30m-M_Control	RNA	AT2G38470	WRKY33	Member of the plant WRKY transcription factor family. Regulates the antagonistic relationship between defense pathways mediating responses to P. syringae and necrotrophic fungal pathogens. Located in nucleus. Involved in response to various abiotic stresses - especially salt stress.
BnaA07G0301500ZS	M_WCS417_30m	M_Control	278.325	70.5698	174.447	1.98322	0.241175	8.22313	1.98253e-16	1.37809e-14	Up	M_WCS417_30m-M_Control	RNA	AT1G68440	--	--
BnaA10G0167600ZS	M_WCS417_30m	M_Control	1337.59	634.433	986.01	1.07641	0.13092	8.22192	2.00271e-16	1.39021e-14	Up	M_WCS417_30m-M_Control	RNA	AT5G21990	TPR7	Encodes one of the 36 carboxylate clamp (CC)-tetratricopeptide repeat (TPR) proteins (Prasad 2010, Pubmed ID: 20856808). Functions as a chaperone receptor at the chloroplast outer envelope, mediating Hsp70-dependent protein targeting to chloroplasts. It has been localized to the ER membrane, interacts with the Sec translocon, and has a potential function in post-translational protein transport in…
BnaA02G0312200ZS	M_WCS417_30m	M_Control	304.203	84.1424	194.173	1.85317	0.225417	8.22108	2.01673e-16	1.39803e-14	Up	M_WCS417_30m-M_Control	RNA	AT2G01150	RHA2B	Encodes a RING-H2 finger protein that is expressed in vascular tissue, root tips, embryos and pistils.
BnaC01G0358400ZS	M_WCS417_30m	M_Control	882.298	1747.43	1314.86	-0.985964	0.119995	-8.21668	2.09214e-16	1.44832e-14	Normal	M_WCS417_30m-M_Control	RNA	AT3G23430	PHO1	mutant is deficient in the transfer of phosphate from root epidermal and cortical cells to the xylem. encodes protein with the mainly hydrophilic N-terminal and the C-terminal containing 6 potential membrane-spanning domains.
BnaA10G0258400ZS	M_WCS417_30m	M_Control	138.852	12.9071	75.8797	3.40937	0.415014	8.21506	2.12061e-16	1.46603e-14	Up	M_WCS417_30m-M_Control	RNA	AT5G07010	ST2A	Encodes a sulfotransferase that acts specifically on 11- and 12-hydroxyjasmonic acid. Transcript levels for this enzyme are increased by treatments with jasmonic acid (JA), 12-hydroxyJA, JA-isoleucine, and 12-oxyphytodienoic acid (a JA precursor).
BnaA02G0401000ZS	M_WCS417_30m	M_Control	242.506	618.881	430.693	-1.35221	0.164681	-8.21107	2.19221e-16	1.51346e-14	Down	M_WCS417_30m-M_Control	RNA	AT5G62520	SRO5	Encodes a protein with similarity to RCD1 but without the WWE domain. The protein does have a PARP signature upstream of the C-terminal protein interaction domain. The PARP signature may bind NAD+ and attach the ADP-ribose-moiety from NAD+ to the target molecule. Its presence suggests a role for the protein in ADP ribosylation. Up-regulated by NaCl. SRO5 and P5CDH (an overlapping gene in the anti…
BnaC03G0447200ZS	M_WCS417_30m	M_Control	949.131	423.191	686.161	1.16539	0.141936	8.21073	2.19851e-16	1.51575e-14	Up	M_WCS417_30m-M_Control	RNA	AT3G21230	4CL5	The gene encodes a 4-coumarate coenzyme A ligase being able to use sinapate as substrate. The catalytic efficiency was in the following (descending) order: p-coumaric acid, caffeic acid, 5-OH-ferulic acid, ferulic acid and sinapic acid. At4CL5 was unable to use cinnamic acid as substrate. Knockout of At4CL5 (4cl5) revealed no effect on syringyl lignin content indicating that the activity observed…
BnaC07G0266800ZS	M_WCS417_30m	M_Control	1467.67	685.831	1076.75	1.09843	0.133954	8.20005	2.40293e-16	1.65443e-14	Up	M_WCS417_30m-M_Control	RNA	AT2G01450	MPK17	member of MAP Kinase
Bnascaffold0089G0000200ZS	M_WCS417_30m	M_Control	118.709	5.75958	62.2341	4.34868	0.530665	8.19479	2.51029e-16	1.726e-14	Up	M_WCS417_30m-M_Control	RNA	AT1G29850	PDCD5	double-stranded DNA-binding family protein
BnaA09G0473300ZS	M_WCS417_30m	M_Control	37.6371	199.349	118.493	-2.40636	0.293659	-8.19441	2.51833e-16	1.72919e-14	Down	M_WCS417_30m-M_Control	RNA	AT3G50800	--	--
BnaA10G0259000ZS	M_WCS417_30m	M_Control	444.613	997.227	720.92	-1.16508	0.142346	-8.18487	2.72588e-16	1.86917e-14	Down	M_WCS417_30m-M_Control	RNA	AT5G07070	SnRK3.2	Encodes CBL-interacting protein kinase 2 (CIPK2).
BnaA10G0110000ZS	M_WCS417_30m	M_Control	1120.76	504.793	812.775	1.14971	0.140543	8.18046	2.8276e-16	1.93629e-14	Up	M_WCS417_30m-M_Control	RNA	AT5G54810	TSB1	A.thaliana tryptophan synthase beta subunit (trpB)
BnaA01G0008700ZS	M_WCS417_30m	M_Control	1119.66	504.741	812.2	1.14829	0.140374	8.18019	2.83402e-16	1.93719e-14	Up	M_WCS417_30m-M_Control	RNA	AT4G39950	CYP79B2	Belongs to cytochrome P450 and is involved in tryptophan metabolism. Converts Trp to indo-3-acetaldoxime (IAOx), a precursor to IAA and indole glucosinolates.
BnaA05G0039400ZS	M_WCS417_30m	M_Control	1137.66	2188.64	1663.15	-0.943804	0.115378	-8.18008	2.83655e-16	1.93719e-14	Normal	M_WCS417_30m-M_Control	RNA	AT2G43620	--	Chitinase family protein
BnaA09G0650600ZS	M_WCS417_30m	M_Control	417.646	138.863	278.255	1.58685	0.193995	8.17987	2.84152e-16	1.93797e-14	Up	M_WCS417_30m-M_Control	RNA	AT1G78860	GAL2	curculin-like (mannose-binding) lectin family protein, low similarity to Ser/Thr protein kinase (Zea mays) GI:2598067; contains Pfam profile PF01453: Lectin (probable mannose binding) but not the protein kinase domain of the Z. mays protein
BnaC05G0266700ZS	M_WCS417_30m	M_Control	1043.92	471.95	757.936	1.14537	0.140042	8.17871	2.86901e-16	1.95409e-14	Up	M_WCS417_30m-M_Control	RNA	AT1G30730	AtBBE11	FAD-binding Berberine family protein
BnaC08G0234200ZS	M_WCS417_30m	M_Control	1583.06	2940.45	2261.76	-0.893387	0.109384	-8.16741	3.15076e-16	2.14311e-14	Normal	M_WCS417_30m-M_Control	RNA	AT1G15690	VHP1	--
BnaC06G0428700ZS	M_WCS417_30m	M_Control	668.729	1384.76	1026.74	-1.05018	0.128737	-8.15753	3.4195e-16	2.32278e-14	Down	M_WCS417_30m-M_Control	RNA	AT1G76900	TLP1	Member of TLP family
BnaC03G0507900ZS	M_WCS417_30m	M_Control	2603.46	1365.78	1984.62	0.930531	0.114136	8.15283	3.55517e-16	2.41171e-14	Normal	M_WCS417_30m-M_Control	RNA	AT2G17840	ERD7	Identified as drought-inducible gene by differential hybridization. Upregulated by high light, drought, cold and salt stress determined by microarray analysis.
BnaC08G0413200ZS	M_WCS417_30m	M_Control	1607.81	798.918	1203.36	1.00941	0.123996	8.14067	3.93094e-16	2.66305e-14	Up	M_WCS417_30m-M_Control	RNA	AT3G62420	BZIP53	Encodes a group-S bZIP transcription factor. Forms heterodimers with group-C bZIP transcription factors. The heterodimers bind to the ACTCAT cis-element of proline dehydrogenase gene.
BnaA04G0186000ZS	M_WCS417_30m	M_Control	510.23	1095.91	803.07	-1.10325	0.135656	-8.13276	4.19623e-16	2.83898e-14	Down	M_WCS417_30m-M_Control	RNA	AT2G28780	--	--
BnaA10G0004400ZS	M_WCS417_30m	M_Control	4733.89	2646.01	3689.95	0.839218	0.103247	8.12822	4.35649e-16	2.94348e-14	Normal	M_WCS417_30m-M_Control	RNA	AT1G01550	BPS1	Encodes a protein with no functionally characterized domains that to prevent the synthesis of a novel substance that moves from the root to the shoot, where it modifies shoot growth by interfering with auxin signaling. Synthesis and delivery of this substance requires neither phloem nor endodermis.
BnaC04G0255900ZS	M_WCS417_30m	M_Control	87.3914	311.384	199.388	-1.83244	0.225462	-8.12748	4.38317e-16	2.95756e-14	Down	M_WCS417_30m-M_Control	RNA	AT3G63210	MARD1	encodes a novel zinc-finger protein with a proline-rich N-terminus, identical to senescence-associated protein SAG102
BnaC09G0334700ZS	M_WCS417_30m	M_Control	196.301	36.7768	116.539	2.42055	0.297956	8.12385	4.51635e-16	3.04337e-14	Up	M_WCS417_30m-M_Control	RNA	AT1G65481	--	--
BnaA07G0277800ZS	M_WCS417_30m	M_Control	130.579	403.782	267.18	-1.62952	0.200598	-8.12332	4.53612e-16	3.05264e-14	Down	M_WCS417_30m-M_Control	RNA	AT1G67880	--	beta-1,4-N-acetylglucosaminyltransferase family protein
BnaC05G0575200ZS	M_WCS417_30m	M_Control	52.7717	233.662	143.217	-2.14546	0.264124	-8.12294	4.5501e-16	3.05798e-14	Down	M_WCS417_30m-M_Control	RNA	AT3G18710	PUB29	Encodes a protein containing a U-box and an ARM domain. This protein has E3 ubiquitin ligase activity based on in vitro assays.
BnaA06G0157800ZS	M_WCS417_30m	M_Control	124.164	405.85	265.007	-1.70772	0.210269	-8.12158	4.60156e-16	3.08847e-14	Down	M_WCS417_30m-M_Control	RNA	AT3G49580	LSU1	response to low sulfur 1
BnaC06G0194500ZS	M_WCS417_30m	M_Control	810.747	350.469	580.608	1.21051	0.149074	8.12017	4.65532e-16	3.12042e-14	Up	M_WCS417_30m-M_Control	RNA	AT3G55430	--	O-Glycosyl hydrolases family 17 protein
BnaC04G0040000ZS	M_WCS417_30m	M_Control	8379.9	4753.9	6566.9	0.817925	0.100732	8.11984	4.66784e-16	3.12468e-14	Normal	M_WCS417_30m-M_Control	RNA	--	--	--
BnaA02G0393100ZS	M_WCS417_30m	M_Control	441.665	153.678	297.672	1.52204	0.187456	8.11947	4.68231e-16	3.13023e-14	Up	M_WCS417_30m-M_Control	RNA	AT5G61210	SNP33	membrane localized t-SNARE SNAP25 homologue, probably involved in cytokinesis and cell plate formation
BnaC01G0373000ZS	M_WCS417_30m	M_Control	163.15	458.83	310.99	-1.49202	0.183809	-8.11723	4.76932e-16	3.1842e-14	Down	M_WCS417_30m-M_Control	RNA	AT3G22270	PATH1	Topoisomerase II-associated protein PAT1
BnaA09G0201200ZS	M_WCS417_30m	M_Control	435.44	956.74	696.09	-1.13589	0.139964	-8.11556	4.8355e-16	3.22413e-14	Down	M_WCS417_30m-M_Control	RNA	AT5G45340	CYP707A3	Encodes a protein with ABA 8'-hydroxylase activity; involved in ABA catabolism. Mutant analyses show that disruption in the gene results in more drought tolerance whereas overexpression results in increased transpiration rate and reduced drought tolerance. Gene involved in postgermination growth. Plant P450 CYP707A3, ABA 8'-hydroxylase, binds enantioselectively (+)-ABA but not (-)-ABA, whereas th…
BnaA04G0280200ZS	M_WCS417_30m	M_Control	328.333	765.671	547.002	-1.2219	0.150741	-8.10594	5.23388e-16	3.48517e-14	Down	M_WCS417_30m-M_Control	RNA	AT2G44080	ARL	Encodes ARL, a gene similar to ARGOS involved in cell expansion-dependent organ growth. Upregulated by brassinosteroid. Acts downstream of BRI1.
BnaA09G0033500ZS	M_WCS417_30m	M_Control	1386.93	668.092	1027.51	1.05304	0.129958	8.10292	5.36573e-16	3.56828e-14	Up	M_WCS417_30m-M_Control	RNA	AT4G03510	RMA1	RMA1 encodes a novel 28 kDa protein with a RING finger motif and a C-terminal membrane-anchoring domain that is involved in the secretory pathway. Has E3 ubiquitin ligase activity.
BnaA07G0279800ZS	M_WCS417_30m	M_Control	101.089	334.724	217.906	-1.72728	0.213249	-8.09983	5.50365e-16	3.6552e-14	Down	M_WCS417_30m-M_Control	RNA	AT2G14247	--	Expressed protein
BnaA04G0183300ZS	M_WCS417_30m	M_Control	519.798	1111.69	815.744	-1.09645	0.135421	-8.09661	5.65135e-16	3.74838e-14	Down	M_WCS417_30m-M_Control	RNA	AT2G28400	--	Protein of unknown function, DUF584
BnaC01G0363300ZS	M_WCS417_30m	M_Control	244.69	615.647	430.169	-1.33089	0.164419	-8.09451	5.74963e-16	3.80859e-14	Down	M_WCS417_30m-M_Control	RNA	AT3G23150	ETR2	Involved in ethylene perception in Arabidopsis
BnaC02G0020100ZS	M_WCS417_30m	M_Control	3289.02	1788.43	2538.72	0.87899	0.108617	8.09258	5.84164e-16	3.86448e-14	Normal	M_WCS417_30m-M_Control	RNA	AT5G05340	PRX52	Peroxidase superfamily protein
BnaA02G0324800ZS	M_WCS417_30m	M_Control	892.231	384.96	638.595	1.21142	0.149756	8.08929	6.00129e-16	3.96492e-14	Up	M_WCS417_30m-M_Control	RNA	AT2G02800	PBL3	Encodes protein kinase APK2b.
BnaA06G0073100ZS	M_WCS417_30m	M_Control	955.302	430.504	692.903	1.15082	0.142485	8.07673	6.65264e-16	4.38953e-14	Up	M_WCS417_30m-M_Control	RNA	AT1G11310	PMR2	A member of a large family of seven-transmembrane domain proteins specific to plants, homologs of the barley mildew resistance locus o (MLO) protein. The Arabidopsis genome contains 15 genes encoding MLO proteins, with localization in plasma membrane. Phylogenetic analysis revealed four clades of closely-related AtMLO genes. ATMLO2 belongs to the clade IV, with AtMLO3, AtMLO6 and AtMLO12. The gen…
BnaC02G0095000ZS	M_WCS417_30m	M_Control	463.842	1030.34	747.088	-1.15197	0.142777	-8.0683	7.12839e-16	4.69732e-14	Down	M_WCS417_30m-M_Control	RNA	AT5G19530	ACL5	Encodes a spermine synthase. Required for internode elongation and vascular development, specifically in the mechanism that defines the boundaries between veins and nonvein regions. This mechanism may be mediated by polar auxin transport. Though ACL5 has been shown to function as a spermine synthase in E. coli, an ACL5 knockout has no effect on the endogenous levels of free and conjugated polyami…
BnaA07G0317200ZS	M_WCS417_30m	M_Control	256.076	631.071	443.573	-1.30153	0.161376	-8.06518	7.31252e-16	4.8124e-14	Down	M_WCS417_30m-M_Control	RNA	AT1G70300	KUP6	potassium transporter
BnaA07G0339100ZS	M_WCS417_30m	M_Control	901.096	1810.47	1355.78	-1.00622	0.124801	-8.06265	7.46609e-16	4.90709e-14	Down	M_WCS417_30m-M_Control	RNA	AT1G73540	NUDT21	nudix hydrolase homolog 21
BnaA03G0010100ZS	M_WCS417_30m	M_Control	1537.73	774.835	1156.28	0.988843	0.12268	8.06037	7.60647e-16	4.99288e-14	Normal	M_WCS417_30m-M_Control	RNA	AT5G03380	AtHMP43	Heavy metal transport/detoxification superfamily protein
BnaA06G0158600ZS	M_WCS417_30m	M_Control	761.93	1524.1	1143.01	-1.00042	0.124238	-8.05247	8.11371e-16	5.31894e-14	Down	M_WCS417_30m-M_Control	RNA	AT3G49530	NTL6	Transcription factor that serves as a molecular link between cold signals and pathogen resistance responses. Undergoes proteolytic processing triggered by cold-induced changes in membrane fluidity.
BnaC05G0220200ZS	M_WCS417_30m	M_Control	419.584	145.091	282.337	1.53167	0.190245	8.05107	8.20742e-16	5.37342e-14	Up	M_WCS417_30m-M_Control	RNA	AT1G26665	MED10B	Mediator complex, subunit Med10
BnaC09G0611900ZS	M_WCS417_30m	M_Control	179.095	498.222	338.658	-1.47571	0.18333	-8.0495	8.3134e-16	5.43578e-14	Down	M_WCS417_30m-M_Control	RNA	AT5G03230	--	Protein of unknown function, DUF584
BnaC08G0493000ZS	M_WCS417_30m	M_Control	407.824	132.859	270.342	1.6211	0.201649	8.03924	9.03993e-16	5.90322e-14	Up	M_WCS417_30m-M_Control	RNA	AT1G14200	USR1	RING/U-box superfamily protein
BnaA03G0253700ZS	M_WCS417_30m	M_Control	211.198	552.735	381.966	-1.38813	0.173015	-8.02317	1.03049e-15	6.72057e-14	Down	M_WCS417_30m-M_Control	RNA	AT4G10250	HSP22	Columbia endomembrane-localized small heat shock protein
BnaC04G0508800ZS	M_WCS417_30m	M_Control	376.532	119.173	247.852	1.66119	0.207073	8.02226	1.03814e-15	6.76181e-14	Up	M_WCS417_30m-M_Control	RNA	AT2G31180	MYB14AT	Member of the R2R3 factor gene family.
BnaA05G0045700ZS	M_WCS417_30m	M_Control	480.708	1027.23	753.967	-1.0954	0.136759	-8.00971	1.1498e-15	7.47946e-14	Down	M_WCS417_30m-M_Control	RNA	AT2G44500	--	O-fucosyltransferase family protein
BnaA03G0567200ZS	M_WCS417_30m	M_Control	394.507	132.028	263.267	1.57901	0.19716	8.00876	1.15874e-15	7.52797e-14	Up	M_WCS417_30m-M_Control	RNA	AT4G39940	APK2	adenosine-5'-phosphosulfate-kinase (akn2) mRNA, complete
BnaC08G0374600ZS	M_WCS417_30m	M_Control	158.711	458.538	308.624	-1.53057	0.191511	-7.99208	1.32683e-15	8.60895e-14	Down	M_WCS417_30m-M_Control	RNA	AT3G57530	CPK32	Calcium-dependent Protein Kinase. ABA signaling component that regulates the ABA-responsive gene expression via ABF4. AtCPK32 has autophosphorylation activity and can phosphorylate ABF4 in vitro
BnaC01G0441400ZS	M_WCS417_30m	M_Control	1239.06	587.02	913.04	1.07865	0.135003	7.98983	1.35121e-15	8.75592e-14	Up	M_WCS417_30m-M_Control	RNA	AT3G14200	--	Chaperone DnaJ-domain superfamily protein
BnaC04G0102100ZS	M_WCS417_30m	M_Control	558.325	220.032	389.179	1.34396	0.168212	7.98967	1.35296e-15	8.75608e-14	Up	M_WCS417_30m-M_Control	RNA	AT2G36310	URH1	Encodes a cytoplasmic nucleoside hydrolase. It has the highest levels of activity with uridine followed by xanthosine. It shows little activity with inosine and none with cytidine. Mutant analyses indicate that it plays a role in purine and pyrimidine catabolism.
BnaA03G0088600ZS	M_WCS417_30m	M_Control	449.964	150.944	300.454	1.57267	0.19688	7.98798	1.37173e-15	8.86622e-14	Up	M_WCS417_30m-M_Control	RNA	AT5G20400	--	encodes a protein whose sequence is similar to flavanone 3 hydroxylase from Malus.
BnaA01G0171200ZS	M_WCS417_30m	M_Control	118.851	366.926	242.889	-1.62586	0.203767	-7.979	1.47521e-15	9.5229e-14	Down	M_WCS417_30m-M_Control	RNA	AT4G27670	HSP21	Encodes Hsp21, a chloroplast located small heat shock protein. A structure model of Hsp21, obtained by homology modeling, single-particle electron microscopy, and lysine-specific chemical crosslinking, shows that the Hsp21 subunits are arranged in two hexameric discs, rotated by 25 degree in relation to each other.
BnaC06G0101400ZS	M_WCS417_30m	M_Control	490.688	177.09	333.889	1.47192	0.184481	7.97867	1.47916e-15	9.53625e-14	Up	M_WCS417_30m-M_Control	RNA	AT1G34260	FAB1D	--
BnaC01G0249400ZS	M_WCS417_30m	M_Control	589.092	1262.45	925.772	-1.10015	0.137925	-7.97644	1.50611e-15	9.69765e-14	Down	M_WCS417_30m-M_Control	RNA	AT3G30280	--	HXXXD-type acyl-transferase family protein
BnaC05G0112500ZS	M_WCS417_30m	M_Control	836.197	1639.34	1237.77	-0.971353	0.121789	-7.97573	1.51482e-15	9.74134e-14	Normal	M_WCS417_30m-M_Control	RNA	AT1G14120	AtDAO2	2-oxoglutarate (2OG) and Fe(II)-dependent oxygenase superfamily protein
BnaA05G0042400ZS	M_WCS417_30m	M_Control	182.334	493.407	337.871	-1.4355	0.180171	-7.96745	1.61978e-15	1.04032e-13	Down	M_WCS417_30m-M_Control	RNA	AT2G44080	ARL	Encodes ARL, a gene similar to ARGOS involved in cell expansion-dependent organ growth. Upregulated by brassinosteroid. Acts downstream of BRI1.
BnaC03G0367000ZS	M_WCS417_30m	M_Control	1399.83	667.053	1033.44	1.06834	0.134159	7.96325	1.67574e-15	1.07489e-13	Up	M_WCS417_30m-M_Control	RNA	AT3G06850	LTA1	dihydrolipoamide branched chain acyltransferase
BnaA08G0320700ZS	M_WCS417_30m	M_Control	1046.93	491.708	769.317	1.09096	0.137144	7.95483	1.7937e-15	1.1491e-13	Up	M_WCS417_30m-M_Control	RNA	AT1G02930	GSTF6	Encodes glutathione transferase belonging to the phi class of GSTs. Naming convention according to Wagner et al. (2002).
BnaA02G0287500ZS	M_WCS417_30m	M_Control	57.5591	257.299	157.429	-2.16329	0.27255	-7.93721	2.06774e-15	1.32299e-13	Down	M_WCS417_30m-M_Control	RNA	AT5G44350	--	ethylene-responsive nuclear protein -related
BnaA07G0181600ZS	M_WCS417_30m	M_Control	643.953	258.541	451.247	1.31478	0.165724	7.93359	2.12903e-15	1.36048e-13	Up	M_WCS417_30m-M_Control	RNA	AT3G52870	--	IQ calmodulin-binding motif family protein
BnaA04G0246400ZS	M_WCS417_30m	M_Control	371.853	118.247	245.05	1.65408	0.208728	7.92456	2.28955e-15	1.46122e-13	Up	M_WCS417_30m-M_Control	RNA	AT2G38310	RCAR10	Encodes a member of the PYR (pyrabactin resistance )/PYL(PYR1-like)/RCAR (regulatory components of ABA receptor) family proteins with 14 members. PYR/PYL/RCAR family proteins function as abscisic acid sensors. Mediate ABA-dependent regulation of protein phosphatase 2Cs ABI1 and ABI2.
BnaC07G0386400ZS	M_WCS417_30m	M_Control	402.812	903.713	653.263	-1.1663	0.147182	-7.92423	2.29556e-15	1.46321e-13	Down	M_WCS417_30m-M_Control	RNA	AT3G50060	MYB77	Encodes a member of the R2R3 transcription factor gene family. Expressed in response to potassium deprivation and auxin. Involved in lateral root development. Interacts with ARF7 and regulates the expression of some auxin responsive genes.
BnaC01G0296000ZS	M_WCS417_30m	M_Control	1338.24	2483.32	1910.78	-0.892027	0.112599	-7.92218	2.33389e-15	1.48458e-13	Normal	M_WCS417_30m-M_Control	RNA	AT3G46600	--	GRAS family transcription factor
BnaA02G0161300ZS	M_WCS417_30m	M_Control	2006.7	1051.55	1529.12	0.932447	0.117702	7.92212	2.33494e-15	1.48458e-13	Normal	M_WCS417_30m-M_Control	RNA	AT3G44860	FAMT	Encodes a farnesoic acid carboxyl-O-methyltransferase.
BnaC05G0509100ZS	M_WCS417_30m	M_Control	1541.33	788.257	1164.79	0.967419	0.122138	7.92071	2.36153e-15	1.4996e-13	Normal	M_WCS417_30m-M_Control	RNA	AT3G08760	ATSIK	Encodes an osmotic stress-inducible kinase that functions as a negative regulator of osmotic stress signaling in plants.
BnaC09G0585200ZS	M_WCS417_30m	M_Control	871.969	396.239	634.104	1.13808	0.143695	7.92011	2.37308e-15	1.50505e-13	Up	M_WCS417_30m-M_Control	RNA	AT5G06300	LOG7	Putative lysine decarboxylase family protein
BnaA02G0187200ZS	M_WCS417_30m	M_Control	362.047	114.957	238.502	1.65693	0.209377	7.91361	2.50022e-15	1.5837e-13	Up	M_WCS417_30m-M_Control	RNA	AT1G70300	KUP6	potassium transporter
BnaC01G0104100ZS	M_WCS417_30m	M_Control	251.574	53.7388	152.656	2.21789	0.280316	7.9121	2.53091e-15	1.60114e-13	Up	M_WCS417_30m-M_Control	RNA	AT4G28420	--	Tyrosine transaminase family protein
BnaC06G0342300ZS	M_WCS417_30m	M_Control	444.087	953.553	698.82	-1.10267	0.139452	-7.90717	2.63309e-15	1.6637e-13	Down	M_WCS417_30m-M_Control	RNA	AT1G67810	SUFE2	Encodes a protein capable of stimulating the cysteine desulfurase activity of CpNifS (AT1G08490) in vitro. SufE2:GFP localizes to the chloroplasts where it is likely to play a role in iron-sulfur cluster assembly. Transcript levels for this gene are high in the pollen relative to other organs based on RT-PCR analysis.
BnaA05G0096100ZS	M_WCS417_30m	M_Control	344.316	106.931	225.623	1.68793	0.213498	7.90605	2.65693e-15	1.67668e-13	Up	M_WCS417_30m-M_Control	RNA	AT2G34930	--	disease resistance family protein / LRR family protein
BnaA01G0073800ZS	M_WCS417_30m	M_Control	282.343	75.1493	178.746	1.9143	0.242272	7.90147	2.75637e-15	1.73727e-13	Up	M_WCS417_30m-M_Control	RNA	AT4G29930	--	basic helix-loop-helix (bHLH) DNA-binding superfamily protein
BnaA02G0097900ZS	M_WCS417_30m	M_Control	1097.33	519.664	808.497	1.07762	0.136458	7.89709	2.85495e-15	1.79717e-13	Up	M_WCS417_30m-M_Control	RNA	AT5G60680	--	Protein of unknown function, DUF584
BnaC02G0277700ZS	M_WCS417_30m	M_Control	21.7964	151.832	86.8144	-2.79794	0.354327	-7.89649	2.86866e-15	1.80356e-13	Down	M_WCS417_30m-M_Control	RNA	AT1G18260	HRD3A	Encodes an Arabidopsis homolog of the yeast Hrd3/mammlian Sel1L protein. Involved in ERAD (Endoplasmic reticulum-associated degradation).
BnaC03G0422100ZS	M_WCS417_30m	M_Control	2169.25	1153.58	1661.41	0.910926	0.115407	7.89318	2.94588e-15	1.84981e-13	Normal	M_WCS417_30m-M_Control	RNA	AT3G17390	SAMS3	S-adenosylmethionine synthetase
BnaC03G0410900ZS	M_WCS417_30m	M_Control	561.89	1156.48	859.184	-1.0412	0.131948	-7.89097	2.99841e-15	1.88046e-13	Down	M_WCS417_30m-M_Control	RNA	AT3G15210	RAP2.5	Encodes a member of the ERF (ethylene response factor) subfamily B-1 of ERF/AP2 transcription factor family (ATERF-4). The protein contains one AP2 domain. Acts as a negative regulator of JA-responsive defense gene expression and resistance to the necrotrophic fungal pathogen Fusarium oxysporum and antagonizes JA inhibition of root elongation.
BnaC03G0749700ZS	M_WCS417_30m	M_Control	9742.02	5647.95	7694.99	0.78641	0.0997438	7.8843	3.16291e-15	1.98118e-13	Normal	M_WCS417_30m-M_Control	RNA	AT4G34050	CCoAOMT1	S-adenosyl-L-methionine-dependent methyltransferases superfamily protein
BnaA09G0007400ZS	M_WCS417_30m	M_Control	731.677	314.15	522.913	1.21946	0.15476	7.87972	3.28123e-15	2.05275e-13	Up	M_WCS417_30m-M_Control	RNA	AT4G01250	WRKY22	AtWRKY22 is a member of WRKY Transcription Factor; Group II-e. It is involved in regulation of dark induced leaf senescence.
BnaA04G0031900ZS	M_WCS417_30m	M_Control	1020.24	1949.08	1484.66	-0.933697	0.118504	-7.879	3.30013e-15	2.06009e-13	Normal	M_WCS417_30m-M_Control	RNA	AT3G57010	--	Calcium-dependent phosphotriesterase superfamily protein
BnaA05G0358600ZS	M_WCS417_30m	M_Control	1145.68	554.652	850.165	1.04656	0.13283	7.87896	3.30108e-15	2.06009e-13	Up	M_WCS417_30m-M_Control	RNA	AT3G19930	STP4	Encodes a sucrose hydrogen symporter that is induced by wounding.
BnaA01G0010000ZS	M_WCS417_30m	M_Control	382.32	127.859	255.089	1.57925	0.200471	7.87766	3.33561e-15	2.07907e-13	Up	M_WCS417_30m-M_Control	RNA	AT4G40080	PICALM10a	ENTH/ANTH/VHS superfamily protein
BnaC06G0366900ZS	M_WCS417_30m	M_Control	161.57	443.454	302.512	-1.45662	0.185003	-7.87346	3.44956e-15	2.14745e-13	Down	M_WCS417_30m-M_Control	RNA	AT1G70090	LGT8	Encodes a protein with putative galacturonosyltransferase activity.
BnaA03G0541500ZS	M_WCS417_30m	M_Control	3594.51	2016.84	2805.67	0.833729	0.105896	7.87312	3.45899e-15	2.15069e-13	Normal	M_WCS417_30m-M_Control	RNA	AT4G34050	CCoAOMT1	S-adenosyl-L-methionine-dependent methyltransferases superfamily protein
BnaC04G0027200ZS	M_WCS417_30m	M_Control	635.68	1279.89	957.786	-1.00982	0.128336	-7.86853	3.58835e-15	2.22788e-13	Down	M_WCS417_30m-M_Control	RNA	AT2G41640	GT61	Glycosyltransferase family 61 protein
BnaA02G0115100ZS	M_WCS417_30m	M_Control	350.566	113.923	232.244	1.6212	0.206039	7.8684	3.59193e-15	2.22788e-13	Up	M_WCS417_30m-M_Control	RNA	AT5G57830	MyoB12	Protein of unknown function, DUF593
BnaC03G0566400ZS	M_WCS417_30m	M_Control	399.032	124.474	261.753	1.68296	0.213987	7.86478	3.69735e-15	2.29046e-13	Up	M_WCS417_30m-M_Control	RNA	AT3G48850	PHT3;2	Encodes a mitochondrial phosphate transporter. Modulates plant responses to salt stress.
BnaA03G0443900ZS	M_WCS417_30m	M_Control	649.076	273.776	461.426	1.24538	0.158444	7.86008	3.839e-15	2.37531e-13	Up	M_WCS417_30m-M_Control	RNA	AT4G17900	PLATZ11	PLATZ transcription factor family protein
BnaC05G0460000ZS	M_WCS417_30m	M_Control	955.707	448.283	701.995	1.09182	0.138939	7.85826	3.89505e-15	2.40704e-13	Up	M_WCS417_30m-M_Control	RNA	AT3G14225	GLIP4	Contains lipase signature motif and GDSL domain.
BnaC05G0407200ZS	M_WCS417_30m	M_Control	684.424	288.383	486.403	1.24666	0.158663	7.85728	3.92556e-15	2.42295e-13	Up	M_WCS417_30m-M_Control	RNA	AT3G19010	--	2-oxoglutarate (2OG) and Fe(II)-dependent oxygenase superfamily protein
BnaA03G0287800ZS	M_WCS417_30m	M_Control	142.449	413.518	277.983	-1.53825	0.19589	-7.85261	4.07458e-15	2.51186e-13	Down	M_WCS417_30m-M_Control	RNA	AT3G02480	ABR	Late embryogenesis abundant protein (LEA) family protein
BnaC08G0207100ZS	M_WCS417_30m	M_Control	763.361	328.257	545.809	1.21899	0.155278	7.85038	4.14785e-15	2.55393e-13	Up	M_WCS417_30m-M_Control	RNA	AT1G61360	--	S-locus lectin protein kinase family protein
BnaC07G0303400ZS	M_WCS417_30m	M_Control	576.436	1182.33	879.382	-1.03664	0.132099	-7.84743	4.24662e-15	2.61157e-13	Down	M_WCS417_30m-M_Control	RNA	AT3G27210	--	--
BnaC04G0007200ZS	M_WCS417_30m	M_Control	139.258	400.554	269.906	-1.52467	0.194471	-7.84011	4.50141e-15	2.7649e-13	Down	M_WCS417_30m-M_Control	RNA	AT2G47270	UPB1	Encodes UPBEAT1 (UPB1), a transcription factor with a bHLH domain. Regulates the expression of a set of peroxidases that modulate the balance of reactive oxygen species (ROS) between the zones of cell proliferation and the zone of cell elongation where differentiation begins. Disruption of UPB1 activity alters this ROS balance, leading to a delay in the onset of differentiation.
BnaC05G0455000ZS	M_WCS417_30m	M_Control	834.925	370.155	602.54	1.1728	0.149622	7.83844	4.5617e-15	2.79855e-13	Up	M_WCS417_30m-M_Control	RNA	AT3G14720	MPK19	member of MAP Kinase
BnaC06G0011700ZS	M_WCS417_30m	M_Control	857.263	1650.74	1254	-0.94528	0.120729	-7.82977	4.88749e-15	2.99478e-13	Normal	M_WCS417_30m-M_Control	RNA	AT1G44800	UMAMIT18	Encodes Siliques Are Red 1 (SIAR1). Functions as a bidirectional amino acid transporter that is crucial for the amino acid homeostasis of siliques. Member of nodulin MtN21-like transporter family.
BnaC02G0511500ZS	M_WCS417_30m	M_Control	508.913	191.063	349.988	1.41139	0.180398	7.82377	5.12662e-15	3.13752e-13	Up	M_WCS417_30m-M_Control	RNA	AT5G25160	ZFP3	Encodes a zinc finger protein containing only a single zinc finger.
BnaA07G0323600ZS	M_WCS417_30m	M_Control	863.114	392.028	627.571	1.13916	0.145867	7.80955	5.73939e-15	3.5083e-13	Up	M_WCS417_30m-M_Control	RNA	AT1G71110	--	--
BnaC03G0261800ZS	M_WCS417_30m	M_Control	1332.52	649.161	990.838	1.0366	0.132821	7.80453	5.97238e-15	3.64632e-13	Up	M_WCS417_30m-M_Control	RNA	AT3G61430	PIP1A	a member of the plasma membrane intrinsic protein subfamily PIP1. localizes to the plasma membrane and exhibits water transport activity in Xenopus oocyte. expressed ubiquitously and protein level decreases slightly during leaf development.
BnaC04G0561400ZS	M_WCS417_30m	M_Control	449.837	162.379	306.108	1.47191	0.188666	7.80169	6.10855e-15	3.72497e-13	Up	M_WCS417_30m-M_Control	RNA	AT2G38310	RCAR10	Encodes a member of the PYR (pyrabactin resistance )/PYL(PYR1-like)/RCAR (regulatory components of ABA receptor) family proteins with 14 members. PYR/PYL/RCAR family proteins function as abscisic acid sensors. Mediate ABA-dependent regulation of protein phosphatase 2Cs ABI1 and ABI2.
BnaC08G0436300ZS	M_WCS417_30m	M_Control	4895.35	8346.44	6620.9	-0.769777	0.0986722	-7.80135	6.12473e-15	3.73034e-13	Normal	M_WCS417_30m-M_Control	RNA	AT2G23810	TET8	Member of TETRASPANIN family
BnaC01G0500000ZS	M_WCS417_30m	M_Control	2073.22	1090.3	1581.76	0.926752	0.118926	7.79269	6.55982e-15	3.99054e-13	Normal	M_WCS417_30m-M_Control	RNA	AT3G02470	SAMDC	Encodes a S-adenosylmethionine decarboxylase involved in polyamine biosynthesis.
BnaA10G0011000ZS	M_WCS417_30m	M_Control	662.447	282	472.223	1.23131	0.15802	7.79208	6.59134e-15	4.00491e-13	Up	M_WCS417_30m-M_Control	RNA	AT1G02360	--	Chitinase family protein
BnaC02G0399700ZS	M_WCS417_30m	M_Control	3146.01	1747.13	2446.57	0.84861	0.10897	7.78755	6.83201e-15	4.14449e-13	Normal	M_WCS417_30m-M_Control	RNA	AT5G45280	PAE11	Pectinacetylesterase family protein
BnaC07G0212800ZS	M_WCS417_30m	M_Control	503.236	1060.51	781.875	-1.07498	0.138041	-7.78744	6.83782e-15	4.14449e-13	Down	M_WCS417_30m-M_Control	RNA	AT5G66650	MCU6	Protein of unknown function (DUF607)
BnaA09G0118300ZS	M_WCS417_30m	M_Control	815.465	369.692	592.579	1.14072	0.146534	7.78467	6.9894e-15	4.2265e-13	Up	M_WCS417_30m-M_Control	RNA	AT2G18700	TPS11	Encodes an enzyme putatively involved in trehalose biosynthesis. The protein has a trehalose synthase (TPS)-like domain that may or may not be active as well as a trehalose phosphatase (TPP)-like domain.
BnaC04G0057500ZS	M_WCS417_30m	M_Control	979.425	465.779	722.602	1.07262	0.137805	7.7836	7.04869e-15	4.25727e-13	Up	M_WCS417_30m-M_Control	RNA	AT2G45290	TKL2	Transketolase
BnaA06G0171200ZS	M_WCS417_30m	M_Control	450.217	161.199	305.708	1.48425	0.190743	7.78144	7.17031e-15	4.32558e-13	Up	M_WCS417_30m-M_Control	RNA	AT3G47960	NPF2.10	Encodes a high-affinity, proton-dependent glucosinolate-specific transporter that is crucial for the transport of both methionine- and tryptophan-derived glucosinolates to seeds.
BnaC09G0523600ZS	M_WCS417_30m	M_Control	400.171	124.682	262.427	1.686	0.216735	7.77909	7.30489e-15	4.40152e-13	Up	M_WCS417_30m-M_Control	RNA	AT5G13750	ZIFL1	zinc induced facilitator-like 1
BnaC03G0237200ZS	M_WCS417_30m	M_Control	3198.25	1786.21	2492.23	0.840409	0.108039	7.77877	7.32341e-15	4.40744e-13	Normal	M_WCS417_30m-M_Control	RNA	AT2G27030	CAM5	encodes a calmodulin that has higher affinity to kinesin-like calmodulin binding motor protein than CAM4 or CAM6.
BnaA03G0375500ZS	M_WCS417_30m	M_Control	206.29	537.551	371.921	-1.38259	0.177804	-7.77595	7.48836e-15	4.50137e-13	Down	M_WCS417_30m-M_Control	RNA	AT3G23170	PRP	--
BnaC09G0432300ZS	M_WCS417_30m	M_Control	473.578	173.01	323.294	1.45033	0.186573	7.77356	7.63131e-15	4.58186e-13	Up	M_WCS417_30m-M_Control	RNA	AT5G59780	MYB59	Encodes a putative transcription factor (MYB59).
BnaC09G0165200ZS	M_WCS417_30m	M_Control	121.067	10.3391	65.7032	3.56012	0.458358	7.76711	8.02951e-15	4.81523e-13	Up	M_WCS417_30m-M_Control	RNA	AT1G12630	--	encodes a member of the DREB subfamily A-4 of ERF/AP2 transcription factor family. The protein contains one AP2 domain. There are 17 members in this subfamily including TINY.
BnaC07G0426300ZS	M_WCS417_30m	M_Control	320.901	748.578	534.74	-1.22121	0.157232	-7.76693	8.04124e-15	4.81657e-13	Down	M_WCS417_30m-M_Control	RNA	AT4G18880	HSF A4A	member of Heat Stress Transcription Factor (Hsf) family
BnaA06G0362600ZS	M_WCS417_30m	M_Control	414.391	892.516	653.453	-1.10666	0.142492	-7.76648	8.06989e-15	4.82588e-13	Down	M_WCS417_30m-M_Control	RNA	AT5G48655	STUbL1	RING/U-box superfamily protein
BnaC03G0754000ZS	M_WCS417_30m	M_Control	309.943	706.739	508.341	-1.18914	0.153114	-7.76638	8.07584e-15	4.82588e-13	Down	M_WCS417_30m-M_Control	RNA	AT4G33560	WIP5	Wound-responsive family protein
BnaA05G0459100ZS	M_WCS417_30m	M_Control	318.486	88.9867	203.736	1.84388	0.23746	7.76502	8.16325e-15	4.87238e-13	Up	M_WCS417_30m-M_Control	RNA	AT3G07310	--	Protein of unknown function (DUF760)
BnaC05G0051400ZS	M_WCS417_30m	M_Control	462.239	174.616	318.428	1.40498	0.181061	7.75972	8.51155e-15	5.06895e-13	Up	M_WCS417_30m-M_Control	RNA	AT1G07160	--	Protein phosphatase 2C family protein
BnaC09G0043300ZS	M_WCS417_30m	M_Control	487.091	184.28	335.685	1.40121	0.180575	7.75971	8.5126e-15	5.06895e-13	Up	M_WCS417_30m-M_Control	RNA	AT5G27380	GSHB	Encodes a protein with similarity to glutathione synthetases, which catalyzes one of the early steps in glutathione biosynthesis. Two transcripts have been detected; the longer transcript is less abundant and the protein is localized to the chloroplast. The smaller transcript, in which the transit peptide is truncated, is localized to the cytosol.
BnaC03G0529400ZS	M_WCS417_30m	M_Control	479.135	1027.57	753.352	-1.10115	0.141977	-7.75583	8.77699e-15	5.22025e-13	Down	M_WCS417_30m-M_Control	RNA	AT5G64660	CMPG2	CYS, MET, PRO, and GLY protein 2
Bnascaffold0025G0040200ZS	M_WCS417_30m	M_Control	487.379	186.187	336.783	1.38859	0.179105	7.75294	8.9788e-15	5.33402e-13	Up	M_WCS417_30m-M_Control	RNA	AT5G44070	PCS1	Phytochelatin synthase gene confers tolerance to cadmium ions. Catalyzes phytochelatin (PC) synthesis from glutathione (GSH) in the presence of Cd2+, Zn2+, Cu2+ and Fe3+, but not by Co2+ or Ni2+.
BnaA01G0145600ZS	M_WCS417_30m	M_Control	420.027	141.328	280.677	1.56822	0.202379	7.74893	9.267e-15	5.49878e-13	Up	M_WCS417_30m-M_Control	RNA	AT4G25030	AtNHR2B	--
BnaC04G0127200ZS	M_WCS417_30m	M_Control	919.467	1761.49	1340.48	-0.937852	0.121085	-7.74539	9.52898e-15	5.64762e-13	Normal	M_WCS417_30m-M_Control	RNA	AT1G55920	SERAT2;1	Encodes a chloroplast/cytosol localized serine O-acetyltransferase involved in sulfur assimilation and cysteine biosynthesis. Expressed in the vascular system.
Bnascaffold2448G0000200ZS	M_WCS417_30m	M_Control	882.387	406.308	644.347	1.11804	0.144393	7.74301	9.70891e-15	5.74754e-13	Up	M_WCS417_30m-M_Control	RNA	AT3G02750	--	Protein phosphatase 2C family protein
BnaC07G0021800ZS	M_WCS417_30m	M_Control	213.119	48.6547	130.887	2.13037	0.275142	7.74279	9.72557e-15	5.75068e-13	Up	M_WCS417_30m-M_Control	RNA	AT2G19800	MIOX2	Encodes a myo-inositol oxygenase family gene.
BnaC05G0393800ZS	M_WCS417_30m	M_Control	759.787	336.876	548.332	1.17249	0.151442	7.74221	9.77059e-15	5.77057e-13	Up	M_WCS417_30m-M_Control	RNA	AT3G19930	STP4	Encodes a sucrose hydrogen symporter that is induced by wounding.
BnaC04G0079600ZS	M_WCS417_30m	M_Control	336.916	103.012	219.964	1.7057	0.22055	7.73382	1.0437e-14	6.15696e-13	Up	M_WCS417_30m-M_Control	RNA	AT2G38640	--	Protein of unknown function (DUF567)
BnaC07G0047800ZS	M_WCS417_30m	M_Control	94.1165	310.501	202.309	-1.72274	0.222769	-7.7333	1.04791e-14	6.17256e-13	Down	M_WCS417_30m-M_Control	RNA	AT2G17820	HK1	Encodes a member of the histidine kinase family.
BnaC03G0424000ZS	M_WCS417_30m	M_Control	526.78	203.98	365.38	1.36864	0.176982	7.7332	1.04878e-14	6.17256e-13	Up	M_WCS417_30m-M_Control	RNA	AT3G17650	YSL5	Arabidopsis thaliana metal-nicotianamine transporter YSL5
BnaC03G0751300ZS	M_WCS417_30m	M_Control	1552.79	2810.3	2181.54	-0.855936	0.110734	-7.72969	1.07809e-14	6.33771e-13	Normal	M_WCS417_30m-M_Control	RNA	AT4G33920	APD5	Protein phosphatase 2C family protein
BnaC04G0039700ZS	M_WCS417_30m	M_Control	588.316	244.921	416.618	1.26401	0.163549	7.72861	1.08724e-14	6.38409e-13	Up	M_WCS417_30m-M_Control	RNA	AT2G43120	PRN2	RmlC-like cupins superfamily protein
BnaC04G0392100ZS	M_WCS417_30m	M_Control	725.715	1416.76	1071.24	-0.965213	0.124922	-7.72652	1.10524e-14	6.48229e-13	Normal	M_WCS417_30m-M_Control	RNA	AT5G39670	CML46	Calcium-binding EF-hand family protein
BnaA03G0125100ZS	M_WCS417_30m	M_Control	696.845	304.076	500.46	1.19711	0.15494	7.7263	1.10715e-14	6.48595e-13	Up	M_WCS417_30m-M_Control	RNA	AT5G54620	--	Ankyrin repeat family protein
BnaA08G0154900ZS	M_WCS417_30m	M_Control	11921.5	7110.35	9515.92	0.745559	0.0965316	7.72346	1.13211e-14	6.62453e-13	Normal	M_WCS417_30m-M_Control	RNA	AT4G30530	GGP1	Encodes a gamma-glutamyl peptidase, outside the GGT family, that can hydrolyze gamma-glutamyl peptide bonds.
BnaC04G0205600ZS	M_WCS417_30m	M_Control	154.471	22.5237	88.4975	2.76486	0.358154	7.71975	1.16559e-14	6.81256e-13	Up	M_WCS417_30m-M_Control	RNA	AT2G27690	CYP94C1	Encodes a CYP94C1. Has highest omega-hydroxylase activity with 9,10-epoxystearic acid, while also metabolized lauric acid (C12:0) and C18 unsaturated fatty acids. Gene expression is induced in response to wounding and jasmonic acid treatment.
BnaA09G0015100ZS	M_WCS417_30m	M_Control	1082.27	511.673	796.971	1.08184	0.140153	7.71903	1.17218e-14	6.84321e-13	Up	M_WCS417_30m-M_Control	RNA	AT4G01250	WRKY22	AtWRKY22 is a member of WRKY Transcription Factor; Group II-e. It is involved in regulation of dark induced leaf senescence.
BnaA05G0490400ZS	M_WCS417_30m	M_Control	902.261	417.879	660.07	1.10959	0.143791	7.71669	1.19393e-14	6.96219e-13	Up	M_WCS417_30m-M_Control	RNA	AT3G02750	--	Protein phosphatase 2C family protein
BnaA02G0403500ZS	M_WCS417_30m	M_Control	492.135	190.049	341.092	1.37395	0.178198	7.71022	1.25606e-14	7.31602e-13	Up	M_WCS417_30m-M_Control	RNA	AT5G63490	--	CBS / octicosapeptide/Phox/Bemp1 (PB1) domains-containing protein
BnaC02G0020500ZS	M_WCS417_30m	M_Control	311.301	723.068	517.185	-1.21625	0.157829	-7.70615	1.29673e-14	7.54426e-13	Down	M_WCS417_30m-M_Control	RNA	AT5G05410	DREB2A	Encodes a transcription factor that specifically binds to DRE/CRT cis elements (responsive to drought and low-temperature stress). Belongs to the DREB subfamily A-2 of ERF/AP2 transcription factor family (DREB2A). There are eight members in this subfamily including DREB2B. The protein contains one AP2 domain. Overexpression of transcriptional activation domain of DREB2A resulted in significant dr…
BnaC06G0358800ZS	M_WCS417_30m	M_Control	4329.55	2482.23	3405.89	0.802492	0.104182	7.70279	1.33125e-14	7.73622e-13	Normal	M_WCS417_30m-M_Control	RNA	AT1G33590	--	Leucine-rich repeat (LRR) family protein
BnaA04G0257000ZS	M_WCS417_30m	M_Control	847.377	389.715	618.546	1.12137	0.145585	7.70249	1.33444e-14	7.74589e-13	Up	M_WCS417_30m-M_Control	RNA	AT2G40330	RCAR9	Encodes a member of the PYR (pyrabactin resistance )/PYL(PYR1-like)/RCAR (regulatory components of ABA receptor) family proteins with 14 members. PYR/PYL/RCAR family proteins function as abscisic acid sensors. Mediate ABA-dependent regulation of protein phosphatase 2Cs ABI1 and ABI2.
BnaA03G0129800ZS	M_WCS417_30m	M_Control	2676.76	4728.8	3702.78	-0.821123	0.106753	-7.69182	1.45054e-14	8.41015e-13	Normal	M_WCS417_30m-M_Control	RNA	AT5G53460	GLT1	NADH-dependent glutamate synthase
BnaA07G0337400ZS	M_WCS417_30m	M_Control	547.693	1110.38	829.034	-1.01969	0.132594	-7.6903	1.46795e-14	8.50133e-13	Down	M_WCS417_30m-M_Control	RNA	AT1G73220	45566	organic cation/carnitine transporter1
BnaA01G0101300ZS	M_WCS417_30m	M_Control	2896.54	1613.07	2254.8	0.844439	0.109848	7.68734	1.50224e-14	8.69002e-13	Normal	M_WCS417_30m-M_Control	RNA	--	--	--
BnaC04G0515700ZS	M_WCS417_30m	M_Control	1092.13	530.849	811.49	1.04146	0.135482	7.68703	1.50592e-14	8.70136e-13	Up	M_WCS417_30m-M_Control	RNA	AT2G32020	--	Acyl-CoA N-acyltransferases (NAT) superfamily protein
BnaC03G0206000ZS	M_WCS417_30m	M_Control	1261.73	637.61	949.669	0.984548	0.128105	7.68548	1.5243e-14	8.79754e-13	Normal	M_WCS417_30m-M_Control	RNA	AT2G36880	MAT3	methionine adenosyltransferase 3
BnaA10G0003000ZS	M_WCS417_30m	M_Control	1069.58	1995.42	1532.5	-0.899672	0.117072	-7.68475	1.53297e-14	8.83219e-13	Normal	M_WCS417_30m-M_Control	RNA	AT1G01720	ATAF1	Belongs to a large family of putative transcriptional activators with NAC domain. Transcript level increases in response to wounding and abscisic acid. ATAF1 attentuates ABA signaling and sythesis. Mutants are hyposensitive to ABA.
BnaC08G0466600ZS	M_WCS417_30m	M_Control	464.12	978.831	721.475	-1.0765	0.140084	-7.68468	1.53379e-14	8.83219e-13	Down	M_WCS417_30m-M_Control	RNA	AT1G18740	B1L	Protein of unknown function (DUF793)
BnaA03G0519500ZS	M_WCS417_30m	M_Control	2574.78	1400.43	1987.61	0.878225	0.114297	7.6837	1.54561e-14	8.89017e-13	Normal	M_WCS417_30m-M_Control	RNA	AT4G30530	GGP1	Encodes a gamma-glutamyl peptidase, outside the GGT family, that can hydrolyze gamma-glutamyl peptide bonds.
BnaC05G0180100ZS	M_WCS417_30m	M_Control	384.67	834.895	609.782	-1.1183	0.145599	-7.68069	1.58232e-14	9.09099e-13	Down	M_WCS417_30m-M_Control	RNA	AT1G21010	--	--
BnaA04G0117300ZS	M_WCS417_30m	M_Control	187.511	39.1939	113.352	2.26206	0.294589	7.67871	1.60705e-14	9.2226e-13	Up	M_WCS417_30m-M_Control	RNA	AT5G40390	SIP1	Encodes a protein which might be involved in the formation of verbascose. A T-DNA insertion mutant was shown to have a decreased amount of verbascose (as well as mannitol) whereas the levels of raffinose and stachyose remained unchanged.
BnaC03G0207900ZS	M_WCS417_30m	M_Control	2135.7	1164.18	1649.94	0.875427	0.114114	7.67148	1.70019e-14	9.74608e-13	Normal	M_WCS417_30m-M_Control	RNA	AT2G37110	--	PLAC8 family protein
BnaA10G0190900ZS	M_WCS417_30m	M_Control	521.92	206.808	364.364	1.33512	0.174111	7.66825	1.74358e-14	9.98352e-13	Up	M_WCS417_30m-M_Control	RNA	AT5G17990	TRP1	Encodes the tryptophan biosynthetic enzyme phosphoribosylanthranilate transferase (PAT1, called trpD in bacteria). Converts anthranilate and phosphoribosylpyrophosphate into phosphoribosylanthranilate and inorganic pyrophosphate.
BnaA01G0274000ZS	M_WCS417_30m	M_Control	896.466	400.336	648.401	1.16194	0.151543	7.66738	1.75545e-14	1.00402e-12	Up	M_WCS417_30m-M_Control	RNA	AT1G60750	--	NAD(P)-linked oxidoreductase superfamily protein
BnaA08G0268100ZS	M_WCS417_30m	M_Control	140.29	397.533	268.911	-1.50239	0.196045	-7.6635	1.80938e-14	1.03369e-12	Down	M_WCS417_30m-M_Control	RNA	AT1G15430	--	Protein of unknown function (DUF1644)
BnaA05G0183000ZS	M_WCS417_30m	M_Control	877.191	400.86	639.026	1.12914	0.147555	7.65233	1.97369e-14	1.12629e-12	Up	M_WCS417_30m-M_Control	RNA	AT1G48850	EMB1144	chorismate synthase, putative / 5-enolpyruvylshikimate-3-phosphate phospholyase, putative
BnaC03G0194600ZS	M_WCS417_30m	M_Control	250.405	64.4465	157.426	1.95889	0.255994	7.65209	1.97732e-14	1.12709e-12	Up	M_WCS417_30m-M_Control	RNA	AT2G34930	--	disease resistance family protein / LRR family protein
BnaC01G0083800ZS	M_WCS417_30m	M_Control	689.968	305.407	497.687	1.17567	0.153769	7.64571	2.07803e-14	1.18317e-12	Up	M_WCS417_30m-M_Control	RNA	AT4G30270	XTH24	encodes a protein similar to endo xyloglucan transferase in sequence. It is also very similar to BRU1 in soybean, which is involved in brassinosteroid response.
BnaC05G0504700ZS	M_WCS417_30m	M_Control	1602.01	840.779	1221.4	0.93033	0.121692	7.64495	2.09032e-14	1.18883e-12	Normal	M_WCS417_30m-M_Control	RNA	AT3G09350	Fes1A	Encodes one of the Arabidopsis orthologs of the human Hsp70-binding protein 1 (HspBP-1) and yeast Fes1p: Fes1A (AT3G09350), Fes1B (AT3G53800), Fes1C (AT5G02150). Fes1A is cytosolic and associates with cytosolic Hsp70. Mutants showed increased heat-sensitive phenotype suggestion the involvement of Fes1A in acquired thermotolerance. Does not have nucleotide exchange factor activity in vitro.
BnaA09G0446200ZS	M_WCS417_30m	M_Control	3465.28	1922.56	2693.92	0.849615	0.111138	7.64469	2.09454e-14	1.1899e-12	Normal	M_WCS417_30m-M_Control	RNA	AT1G27130	GSTU13	Encodes glutathione transferase belonging to the tau class of GSTs. Naming convention according to Wagner et al. (2002).
BnaC01G0135400ZS	M_WCS417_30m	M_Control	498.328	197.758	348.043	1.33325	0.174541	7.63862	2.1956e-14	1.24591e-12	Up	M_WCS417_30m-M_Control	RNA	AT4G20920	--	double-stranded RNA-binding domain (DsRBD)-containing protein
BnaC02G0133300ZS	M_WCS417_30m	M_Control	242.243	61.255	151.749	1.98182	0.25953	7.63618	2.2377e-14	1.26838e-12	Up	M_WCS417_30m-M_Control	RNA	AT5G58700	PLC4	phosphatidylinositol-speciwc phospholipase C4
BnaA09G0406600ZS	M_WCS417_30m	M_Control	2479.67	1372.86	1926.26	0.853127	0.111766	7.63318	2.29027e-14	1.29673e-12	Normal	M_WCS417_30m-M_Control	RNA	AT1G30700	AtBBE8	FAD-binding Berberine family protein
BnaA09G0589500ZS	M_WCS417_30m	M_Control	995.051	1854.51	1424.78	-0.898251	0.117721	-7.63036	2.34097e-14	1.32396e-12	Normal	M_WCS417_30m-M_Control	RNA	AT2G22880	VQ12	VQ motif-containing protein
BnaC07G0190900ZS	M_WCS417_30m	M_Control	181.524	473.753	327.639	-1.38406	0.181403	-7.62975	2.35205e-14	1.32874e-12	Down	M_WCS417_30m-M_Control	RNA	AT1G21100	IGMT1	O-methyltransferase family protein
BnaC08G0466900ZS	M_WCS417_30m	M_Control	765.647	346.716	556.182	1.14371	0.150049	7.62223	2.49329e-14	1.40696e-12	Up	M_WCS417_30m-M_Control	RNA	AT5G01750	--	Protein of unknown function (DUF567)
BnaC07G0541600ZS	M_WCS417_30m	M_Control	485.163	190.143	337.653	1.35053	0.177358	7.61473	2.64234e-14	1.48941e-12	Up	M_WCS417_30m-M_Control	RNA	AT4G39940	APK2	adenosine-5'-phosphosulfate-kinase (akn2) mRNA, complete
BnaA09G0216200ZS	M_WCS417_30m	M_Control	187.248	38.6273	112.938	2.27931	0.299381	7.61342	2.66933e-14	1.50295e-12	Up	M_WCS417_30m-M_Control	RNA	AT2G01150	RHA2B	Encodes a RING-H2 finger protein that is expressed in vascular tissue, root tips, embryos and pistils.
BnaA03G0116500ZS	M_WCS417_30m	M_Control	5301.4	3094.08	4197.74	0.776836	0.102061	7.61147	2.70998e-14	1.52414e-12	Normal	M_WCS417_30m-M_Control	RNA	AT5G56010	Hsp81.3	A member of heat shock protein 90 (HSP90) gene family. Expressed in all tissues and abundant in root apical meristem, pollen and tapetum. Expression is NOT heat-induced but induced by IAA and NaCl. Overexpression reduced tolerance to heat and conferred higher tolerance to calcium.
BnaA02G0407800ZS	M_WCS417_30m	M_Control	13540.7	8127.18	10834	0.736468	0.0969144	7.59916	2.98058e-14	1.67262e-12	Normal	M_WCS417_30m-M_Control	RNA	AT5G64260	EXL2	EXORDIUM like 2
BnaC08G0508100ZS	M_WCS417_30m	M_Control	269.995	630.925	450.46	-1.22487	0.161444	-7.58699	3.27422e-14	1.83538e-12	Down	M_WCS417_30m-M_Control	RNA	AT1G12110	NRT1.1	Encodes NRT1.1 (CHL1), a dual-affinity nitrate transporter. The protein is expressed in guard cells and function in stomatal opening. Mutants have less transpiration and are more tolerant to drought. Expressed in lateral roots. Involved in nitrate signaling which enables the plant root system to detect and exploit nitrate-rich soil patches. Comparing to the wild type, the mutant displays a strong…
BnaA09G0267500ZS	M_WCS417_30m	M_Control	113.912	344.642	229.277	-1.59821	0.210705	-7.58503	3.32413e-14	1.86129e-12	Down	M_WCS417_30m-M_Control	RNA	AT4G08300	UMAMIT17	nodulin MtN21-like transporter family protein
BnaA04G0190700ZS	M_WCS417_30m	M_Control	171.186	449.052	310.119	-1.39157	0.183606	-7.57909	3.47996e-14	1.9464e-12	Down	M_WCS417_30m-M_Control	RNA	AT2G29500	HSP17.6B	HSP20-like chaperones superfamily protein
BnaA02G0088000ZS	M_WCS417_30m	M_Control	5573.26	3204.76	4389.01	0.798366	0.105431	7.57242	3.66344e-14	2.04676e-12	Normal	M_WCS417_30m-M_Control	RNA	AT5G21090	--	Leucine-rich repeat (LRR) family protein
BnaC04G0540200ZS	M_WCS417_30m	M_Control	1348.97	695.007	1021.99	0.9567	0.1264	7.56882	3.76638e-14	2.10195e-12	Normal	M_WCS417_30m-M_Control	RNA	AT2G35510	SRO1	Encodes a WWE domain-containing protein with 76% similarity to RCD1. The protein also contains a PARP signature upstream of the C-terminal protein interaction domain. The PARP signature may bind NAD+ and attach the ADP-ribose-moiety from NAD+ to the target molecule. Its presence suggests a role for the protein in ADP ribosylation.
BnaA10G0163100ZS	M_WCS417_30m	M_Control	2078.09	1133.17	1605.63	0.874989	0.11563	7.56717	3.81435e-14	2.12638e-12	Normal	M_WCS417_30m-M_Control	RNA	AT5G22630	ADT5	Encodes a plastid-localized arogenate dehydratase involved in phenylalanine biosynthesis. Not less than six genes encoding ADT were identi&#64257;ed in the Arabidopsis genome: ADT1 [At1g11790]; ADT2 [At3g07630]; ADT3 [At2g27820]; ADT4 [At3g44720]; ADT5 [At5g22630]; and ADT6 [At1g08250].
BnaC03G0055200ZS	M_WCS417_30m	M_Control	492.961	192.929	342.945	1.35461	0.179127	7.56227	3.96095e-14	2.20568e-12	Up	M_WCS417_30m-M_Control	RNA	AT5G12010	--	--
BnaC09G0491600ZS	M_WCS417_30m	M_Control	2231.59	1211.42	1721.51	0.880991	0.116521	7.56082	4.00535e-14	2.22796e-12	Normal	M_WCS417_30m-M_Control	RNA	AT5G17330	GAD1	Encodes one of two isoforms of glutamate decarboxylase.
BnaA03G0399200ZS	M_WCS417_30m	M_Control	459.969	170.13	315.05	1.43277	0.189618	7.55607	4.15429e-14	2.30827e-12	Up	M_WCS417_30m-M_Control	RNA	AT2G16720	MYB7	Encodes a member of MYB3R- and R2R3- type MYB- encoding genes
BnaC05G0015100ZS	M_WCS417_30m	M_Control	167.621	439.903	303.762	-1.39192	0.184309	-7.55208	4.2837e-14	2.37757e-12	Down	M_WCS417_30m-M_Control	RNA	AT5G38700	--	--
BnaC03G0070400ZS	M_WCS417_30m	M_Control	240.156	64.7533	152.455	1.89063	0.250386	7.55088	4.3234e-14	2.39698e-12	Up	M_WCS417_30m-M_Control	RNA	AT5G15070	VIP2	Phosphoglycerate mutase-like family protein
BnaC03G0147500ZS	M_WCS417_30m	M_Control	4980.61	2912.61	3946.61	0.773933	0.102499	7.55067	4.33035e-14	2.39821e-12	Normal	M_WCS417_30m-M_Control	RNA	AT5G54160	OMT3	A caffeic acid/5-hydroxyferulic acid O-methyltransferase. Interacts with 14-4-3 proteins in yeast 2 hybrid assay. AtOMT1 (At5g54160) encodes a flavonol 3锟?O-methyltransferase that is highly active towards quercetin and myricetin. The substrate specificity identifies the enzyme as flavonol 3锟?methyltransferase which replaces the former annotation of the gene to encode a caffeic acid/5-hydroxyferul…
BnaA01G0099400ZS	M_WCS417_30m	M_Control	835.172	386.56	610.866	1.11061	0.147095	7.55026	4.34397e-14	2.40313e-12	Up	M_WCS417_30m-M_Control	RNA	AT4G18950	BHP	Integrin-linked protein kinase family
BnaA02G0342500ZS	M_WCS417_30m	M_Control	691.181	1377.38	1034.28	-0.994919	0.131987	-7.53799	4.77263e-14	2.63738e-12	Normal	M_WCS417_30m-M_Control	RNA	AT3G27210	--	--
BnaC03G0336200ZS	M_WCS417_30m	M_Control	780.383	1500.76	1140.57	-0.943588	0.125199	-7.53669	4.82041e-14	2.66089e-12	Normal	M_WCS417_30m-M_Control	RNA	AT4G00700	MCTP9	C2 calcium/lipid-binding plant phosphoribosyltransferase family protein
BnaA04G0281400ZS	M_WCS417_30m	M_Control	520.045	212.058	366.052	1.29448	0.171814	7.53422	4.91277e-14	2.70892e-12	Up	M_WCS417_30m-M_Control	RNA	AT2G44370	--	Cysteine/Histidine-rich C1 domain family protein
BnaC09G0266800ZS	M_WCS417_30m	M_Control	476.095	975.426	725.76	-1.03473	0.137388	-7.53148	5.01677e-14	2.76326e-12	Down	M_WCS417_30m-M_Control	RNA	AT3G25600	CML16	Calcium-binding EF-hand family protein
BnaA01G0197600ZS	M_WCS417_30m	M_Control	534.965	1074.44	804.7	-1.00597	0.13359	-7.53028	5.06333e-14	2.78588e-12	Down	M_WCS417_30m-M_Control	RNA	AT3G30280	--	HXXXD-type acyl-transferase family protein
BnaA07G0067100ZS	M_WCS417_30m	M_Control	127.577	17.1278	72.3526	2.90059	0.385246	7.52919	5.10562e-14	2.8061e-12	Up	M_WCS417_30m-M_Control	RNA	AT3G50270	--	HXXXD-type acyl-transferase family protein
BnaA07G0371900ZS	M_WCS417_30m	M_Control	207.648	50.1985	128.923	2.04876	0.272363	7.52217	5.3874e-14	2.95776e-12	Up	M_WCS417_30m-M_Control	RNA	AT1G78050	PGM	phosphoglycerate/bisphosphoglycerate mutase
BnaC03G0379800ZS	M_WCS417_30m	M_Control	601.705	241.178	421.442	1.32067	0.175926	7.50699	6.05035e-14	3.31813e-12	Up	M_WCS417_30m-M_Control	RNA	AT3G08860	PYD4	Encodes a protein that is predicted to have beta-alanine aminotransferase activity.
BnaA05G0420600ZS	M_WCS417_30m	M_Control	2201.76	1171.44	1686.6	0.909776	0.121203	7.50625	6.08458e-14	3.3333e-12	Normal	M_WCS417_30m-M_Control	RNA	AT3G13110	SERAT2;2	Encodes a mitochondrial serine O-acetyltransferase involved in sulfur assimilation and cysteine biosynthesis. Expressed in the vascular system.
BnaA05G0492400ZS	M_WCS417_30m	M_Control	841.517	393.193	617.355	1.09689	0.146144	7.50554	6.11762e-14	3.34778e-12	Up	M_WCS417_30m-M_Control	RNA	AT3G02750	--	Protein phosphatase 2C family protein
BnaA01G0355000ZS	M_WCS417_30m	M_Control	258.358	51.1238	154.741	2.33765	0.311764	7.49813	6.4736e-14	3.53876e-12	Up	M_WCS417_30m-M_Control	RNA	AT1G54070	--	Dormancy/auxin associated family protein
BnaA05G0332300ZS	M_WCS417_30m	M_Control	2471.53	1359.39	1915.46	0.86207	0.11507	7.49173	6.79738e-14	3.71175e-12	Normal	M_WCS417_30m-M_Control	RNA	AT3G22890	ATPS1	encodes ATP sulfurylase, the first enzyme in the sulfate assimilation pathway of Arabidopsis. It may also participate in selenium metabolism.
BnaA08G0197700ZS	M_WCS417_30m	M_Control	1936.33	1028.13	1482.23	0.913038	0.121877	7.49148	6.81007e-14	3.71468e-12	Normal	M_WCS417_30m-M_Control	RNA	AT4G39090	RD19A	Similar to cysteine proteinases, induced by desiccation but not abscisic acid. Required for RRS1-R mediated resistance against Ralstonia solanacearum. Interacts with the R. solanacearum type III effector PopP2. RD19 associates with PopP2 to form a nuclear complex that is required for activation of the RRS1-R鈥搈ediated resistance response.
BnaA04G0149700ZS	M_WCS417_30m	M_Control	335.916	109.816	222.866	1.61607	0.215867	7.48644	7.07685e-14	3.85605e-12	Up	M_WCS417_30m-M_Control	RNA	AT2G22800	HAT9	Encodes homeobox protein HAT9.
BnaA04G0102600ZS	M_WCS417_30m	M_Control	277.467	633.555	455.511	-1.19105	0.159151	-7.48378	7.22134e-14	3.93055e-12	Down	M_WCS417_30m-M_Control	RNA	AT1G70830	MLP28	MLP-like protein 28
BnaA09G0569500ZS	M_WCS417_30m	M_Control	166.136	435.73	300.933	-1.3915	0.186069	-7.47839	7.52384e-14	4.0908e-12	Down	M_WCS417_30m-M_Control	RNA	AT3G63200	PLP9	PATATIN-like protein 9
BnaC02G0368700ZS	M_WCS417_30m	M_Control	989.788	1859.18	1424.49	-0.909138	0.121572	-7.47816	7.53685e-14	4.09349e-12	Normal	M_WCS417_30m-M_Control	RNA	AT4G10310	HKT1;1	encodes a sodium transporter (HKT1) expressed in xylem parenchyma cells. Mutants over-accumulate sodium in shoot tissue and have increased sodium in the xylem sap and reduced sodium in phloem sap and roots.
BnaA06G0019900ZS	M_WCS417_30m	M_Control	713.772	314.654	514.213	1.18038	0.157872	7.47681	7.61456e-14	4.13126e-12	Up	M_WCS417_30m-M_Control	RNA	AT1G52200	--	PLAC8 family protein
BnaA10G0100700ZS	M_WCS417_30m	M_Control	439.037	939.714	689.375	-1.09732	0.146855	-7.47212	7.89118e-14	4.27677e-12	Down	M_WCS417_30m-M_Control	RNA	AT5G53590	SAUR30	SAUR-like auxin-responsive protein family
BnaA06G0269700ZS	M_WCS417_30m	M_Control	395.58	856.224	625.902	-1.11439	0.149179	-7.47015	8.0103e-14	4.33669e-12	Down	M_WCS417_30m-M_Control	RNA	AT3G49530	NTL6	Transcription factor that serves as a molecular link between cold signals and pathogen resistance responses. Undergoes proteolytic processing triggered by cold-induced changes in membrane fluidity.
BnaA04G0122700ZS	M_WCS417_30m	M_Control	778.853	359.415	569.134	1.11612	0.149701	7.45571	8.93824e-14	4.8339e-12	Up	M_WCS417_30m-M_Control	RNA	AT5G41040	RWP1	Encodes a feruloyl-CoA transferase required for suberin synthesis. Has feruloyl-CoA-dependent feruloyl transferase activity towards substrates with a primary alcohol.
BnaC04G0483800ZS	M_WCS417_30m	M_Control	539.91	1093.8	816.855	-1.01902	0.136742	-7.45217	9.18202e-14	4.95727e-12	Down	M_WCS417_30m-M_Control	RNA	AT2G28400	--	Protein of unknown function, DUF584
BnaC04G0313100ZS	M_WCS417_30m	M_Control	507.093	201.106	354.099	1.33482	0.179119	7.45211	9.18593e-14	4.95727e-12	Up	M_WCS417_30m-M_Control	RNA	AT3G55740	PROT2	Encodes a proline transporter with affinity for gly betaine, proline, and GABA. Protein is expressed most highly in the roots.
BnaA01G0420800ZS	M_WCS417_30m	M_Control	392.61	828.834	610.722	-1.07798	0.144768	-7.44626	9.60202e-14	5.1763e-12	Down	M_WCS417_30m-M_Control	RNA	AT3G01470	HD-ZIP-1	Encodes a homeodomain leucine zipper class I (HD-Zip I) transcriptional activator involved in leaf development.
BnaC07G0322000ZS	M_WCS417_30m	M_Control	494.665	1066.68	780.675	-1.1088	0.148954	-7.44392	9.77413e-14	5.26349e-12	Down	M_WCS417_30m-M_Control	RNA	AT3G29970	--	B12D protein
BnaA09G0445900ZS	M_WCS417_30m	M_Control	1833.64	3229.73	2531.68	-0.816765	0.10973	-7.44342	9.81089e-14	5.27768e-12	Normal	M_WCS417_30m-M_Control	RNA	AT1G27100	--	Actin cross-linking protein
BnaC04G0407900ZS	M_WCS417_30m	M_Control	969.968	468.281	719.124	1.04964	0.141102	7.4389	1.0153e-13	5.4559e-12	Up	M_WCS417_30m-M_Control	RNA	AT5G40780	LHT1	Encodes LHT1 (lysine histidine transporter), a high-affinity transporter for cellular amino acid uptake in both root epidermis and leaf mesophyll.
BnaC06G0320300ZS	M_WCS417_30m	M_Control	96.4753	302.173	199.324	-1.64638	0.221595	-7.42967	1.08872e-13	5.84426e-12	Down	M_WCS417_30m-M_Control	RNA	AT2G14247	--	Expressed protein
BnaA05G0051500ZS	M_WCS417_30m	M_Control	916.864	446.952	681.908	1.03673	0.139699	7.42116	1.16102e-13	6.22578e-12	Up	M_WCS417_30m-M_Control	RNA	AT2G45290	TKL2	Transketolase
BnaA03G0127100ZS	M_WCS417_30m	M_Control	4807.8	2826.4	3817.1	0.766299	0.103266	7.42061	1.16582e-13	6.24488e-12	Normal	M_WCS417_30m-M_Control	RNA	AT5G54160	OMT3	A caffeic acid/5-hydroxyferulic acid O-methyltransferase. Interacts with 14-4-3 proteins in yeast 2 hybrid assay. AtOMT1 (At5g54160) encodes a flavonol 3锟?O-methyltransferase that is highly active towards quercetin and myricetin. The substrate specificity identifies the enzyme as flavonol 3锟?methyltransferase which replaces the former annotation of the gene to encode a caffeic acid/5-hydroxyferul…
BnaA09G0602400ZS	M_WCS417_30m	M_Control	600.075	259.382	429.729	1.21104	0.163315	7.41536	1.21293e-13	6.48789e-12	Up	M_WCS417_30m-M_Control	RNA	AT2G20950	--	Arabidopsis phospholipase-like protein (PEARLI 4) family
BnaA05G0059900ZS	M_WCS417_30m	M_Control	169.828	34.7183	102.273	2.29265	0.30918	7.41527	1.21374e-13	6.48789e-12	Up	M_WCS417_30m-M_Control	RNA	AT2G40180	PP2C5	Encodes PP2C5, a member of the PP2C family phosphatases. PP2C5 acts as a MAPK phosphatase that positively regulates seed germination, stomatal closure and ABA-inducible gene expression.
BnaC02G0268000ZS	M_WCS417_30m	M_Control	45.8314	203.097	124.464	-2.15041	0.290078	-7.41321	1.2328e-13	6.5828e-12	Down	M_WCS417_30m-M_Control	RNA	AT1G72540	PBL33	Protein kinase superfamily protein
BnaC03G0137300ZS	M_WCS417_30m	M_Control	131.722	18.7236	75.2228	2.8235	0.381038	7.41003	1.26275e-13	6.73565e-12	Up	M_WCS417_30m-M_Control	RNA	AT5G55970	DDR1	RING/U-box superfamily protein
BnaA03G0499200ZS	M_WCS417_30m	M_Control	766.661	1520.99	1143.83	-0.988469	0.133408	-7.40935	1.26922e-13	6.76301e-12	Normal	M_WCS417_30m-M_Control	RNA	AT4G27657	--	--
BnaC01G0444800ZS	M_WCS417_30m	M_Control	1461.42	776.223	1118.82	0.912816	0.123232	7.40729	1.28907e-13	6.8616e-12	Normal	M_WCS417_30m-M_Control	RNA	AT3G13790	CWI1	Encodes a protein with invertase activity.
BnaA07G0388500ZS	M_WCS417_30m	M_Control	1351.77	698.439	1025.11	0.952059	0.128554	7.4059	1.3026e-13	6.92631e-12	Normal	M_WCS417_30m-M_Control	RNA	AT1G15690	VHP1	Encodes a H(+)-translocating (pyrophosphate-energized) inorganic pyrophosphatase (H(+)-PPase; EC 3.6.1.1) located in the vacuolar membrane. Expression is found in all tissues examined, including meristems and floral organ primordium. Expression is particularly enhanced in pollen, and is repressed by light. Over expression and loss of function phenotypes suggest AVP1 is involved in regulation of a…
BnaA06G0379200ZS	M_WCS417_30m	M_Control	469.139	186.088	327.613	1.335	0.180384	7.40088	1.35289e-13	7.1787e-12	Up	M_WCS417_30m-M_Control	RNA	AT3G27960	KLCR2	Tetratricopeptide repeat (TPR)-like superfamily protein
BnaC06G0303400ZS	M_WCS417_30m	M_Control	1373.72	697.346	1035.53	0.978735	0.132298	7.39796	1.38297e-13	7.33061e-12	Normal	M_WCS417_30m-M_Control	RNA	AT1G69930	GSTU11	Encodes glutathione transferase belonging to the tau class of GSTs. Naming convention according to Wagner et al. (2002).
BnaA05G0045500ZS	M_WCS417_30m	M_Control	2045.98	1107.58	1576.78	0.885735	0.119761	7.39584	1.40515e-13	7.44039e-12	Normal	M_WCS417_30m-M_Control	RNA	AT2G44490	PEN2	Encodes a glycosyl hydrolase that localizes to peroxisomes and acts as a component of an inducible preinvasion resistance mechanism. Required for mlo resistance.
BnaC04G0067500ZS	M_WCS417_30m	M_Control	879.996	1629.69	1254.84	-0.889089	0.120274	-7.39218	1.44438e-13	7.64012e-12	Normal	M_WCS417_30m-M_Control	RNA	AT2G40000	HSPRO2	ortholog of sugar beet HS1 PRO-1 2
BnaA06G0352400ZS	M_WCS417_30m	M_Control	1695.09	917.499	1306.29	0.885342	0.119792	7.39064	1.46129e-13	7.72153e-12	Normal	M_WCS417_30m-M_Control	RNA	AT5G28040	VFP4	DNA-binding storekeeper protein-related transcriptional regulator
BnaA05G0388600ZS	M_WCS417_30m	M_Control	361.021	116.958	238.99	1.62573	0.220102	7.38623	1.51049e-13	7.97319e-12	Up	M_WCS417_30m-M_Control	RNA	AT3G16800	EGR3	Protein phosphatase 2C family protein
BnaC03G0025200ZS	M_WCS417_30m	M_Control	133.612	17.4396	75.5259	2.95558	0.40017	7.3858	1.51539e-13	7.99073e-12	Up	M_WCS417_30m-M_Control	RNA	AT5G05600	JOX2	2-oxoglutarate (2OG) and Fe(II)-dependent oxygenase superfamily protein
BnaC04G0094200ZS	M_WCS417_30m	M_Control	674.315	283.501	478.908	1.25027	0.16943	7.37929	1.59135e-13	8.38253e-12	Up	M_WCS417_30m-M_Control	RNA	AT2G37170	PIP2B	a member of the plasma membrane intrinsic protein subfamily PIP2. localizes to the plasma membrane and exhibits water transport activity in Xenopus oocyte. expressed specifically in the vascular bundles and protein level increases slightly during leaf dev
BnaA08G0274200ZS	M_WCS417_30m	M_Control	207.838	52.3088	130.074	1.99242	0.270092	7.37683	1.62099e-13	8.52983e-12	Up	M_WCS417_30m-M_Control	RNA	AT1G13880	ELM2	ELM2 domain-containing protein
BnaC06G0457000ZS	M_WCS417_30m	M_Control	1109.85	563.801	836.824	0.976926	0.132467	7.37487	1.64506e-13	8.64751e-12	Normal	M_WCS417_30m-M_Control	RNA	AT1G80460	NHO1	Encodes a protein similar to glycerol kinase, which converts glycerol to glycerol 3-phosphate and performs a rate-limiting step in glycerol metabolism. This gene is required for both general and specific resistance against bacteria and fungi. Arabidopsis thaliana glycerol kinase (GLR1) mRNA.Involved in flagellin-induced non-host resistance to Pseudomonas. Coronatine partially suppresses flagellin…
BnaC01G0091800ZS	M_WCS417_30m	M_Control	190.481	479.441	334.961	-1.33225	0.180661	-7.37432	1.6519e-13	8.67444e-12	Down	M_WCS417_30m-M_Control	RNA	AT4G29700	--	Alkaline-phosphatase-like family protein
BnaA03G0190800ZS	M_WCS417_30m	M_Control	162.197	32.0934	97.1452	2.33574	0.316875	7.37116	1.69147e-13	8.87306e-12	Up	M_WCS417_30m-M_Control	RNA	AT2G39200	MLO12	A member of a large family of seven-transmembrane domain proteins specific to plants, homologs of the barley mildew resistance locus o (MLO) protein. The Arabidopsis genome contains 15 genes encoding MLO proteins, with localization in plasma membrane. Phylogenetic analysis revealed four clades of closely-related AtMLO genes. ATMLO6 belongs to the clade IV, with AtMLO2, AtMLO3 and AtMLO12. The gen…
BnaC01G0011900ZS	M_WCS417_30m	M_Control	254.822	73.9592	164.391	1.7841	0.242051	7.37077	1.69642e-13	8.88979e-12	Up	M_WCS417_30m-M_Control	RNA	AT4G40080	PICALM10a	ENTH/ANTH/VHS superfamily protein
BnaA08G0007400ZS	M_WCS417_30m	M_Control	153.233	416.387	284.81	-1.44218	0.195682	-7.37	1.70631e-13	8.9324e-12	Down	M_WCS417_30m-M_Control	RNA	AT1G55210	--	Disease resistance-responsive (dirigent-like protein) family protein
BnaA03G0041300ZS	M_WCS417_30m	M_Control	1816.43	982.403	1399.41	0.886502	0.120293	7.36953	1.71228e-13	8.95442e-12	Normal	M_WCS417_30m-M_Control	RNA	AT5G10550	GTE2	This gene is predicted to encode a bromodomain-containing protein. A plant line expressing RNAi constructs targeted against GTE7 shows some resistance to agrobacterium-mediated root transformation.
BnaC09G0272700ZS	M_WCS417_30m	M_Control	455.482	180.324	317.903	1.33704	0.181438	7.3691	1.71783e-13	8.97417e-12	Up	M_WCS417_30m-M_Control	RNA	AT4G05070	WIP2	Wound-responsive family protein
BnaC01G0089900ZS	M_WCS417_30m	M_Control	819.981	1590.67	1205.33	-0.956141	0.129865	-7.36256	1.80416e-13	9.41542e-12	Normal	M_WCS417_30m-M_Control	RNA	AT1G17160	RBSK	pfkB-like carbohydrate kinase family protein
BnaC01G0471200ZS	M_WCS417_30m	M_Control	209.665	514.236	361.951	-1.29354	0.175728	-7.36105	1.82471e-13	9.51291e-12	Down	M_WCS417_30m-M_Control	RNA	AT5G05300	IDL6	--
BnaC04G0080600ZS	M_WCS417_30m	M_Control	1390.96	2470.13	1930.55	-0.828655	0.112608	-7.35877	1.8561e-13	9.66661e-12	Normal	M_WCS417_30m-M_Control	RNA	AT2G38470	WRKY33	Member of the plant WRKY transcription factor family. Regulates the antagonistic relationship between defense pathways mediating responses to P. syringae and necrotrophic fungal pathogens. Located in nucleus. Involved in response to various abiotic stresses - especially salt stress.
BnaC02G0497900ZS	M_WCS417_30m	M_Control	561.089	236.069	398.579	1.24791	0.169783	7.35	1.98201e-13	1.03118e-11	Up	M_WCS417_30m-M_Control	RNA	AT5G27420	CNI1	Encodes CNI1 (Carbon/Nitrogen Insensitive1) (also named as ATL31), a RING type ubiquitin ligase that functions in the Carbon/Nitrogen response for growth phase transition in Arabidopsis seedlings.
BnaC05G0466600ZS	M_WCS417_30m	M_Control	248.319	575.949	412.134	-1.21336	0.165134	-7.34774	2.01587e-13	1.04771e-11	Down	M_WCS417_30m-M_Control	RNA	AT3G13690	--	Protein kinase protein with adenine nucleotide alpha hydrolases-like domain
BnaA02G0151400ZS	M_WCS417_30m	M_Control	203.304	498.783	351.044	-1.29542	0.176312	-7.34734	2.02193e-13	1.04979e-11	Down	M_WCS417_30m-M_Control	RNA	AT5G50900	--	ARM repeat superfamily protein
BnaC03G0497600ZS	M_WCS417_30m	M_Control	295.714	91.9554	193.835	1.6816	0.229133	7.33896	2.15262e-13	1.1165e-11	Up	M_WCS417_30m-M_Control	RNA	AT2G16720	MYB7	Encodes a member of MYB3R- and R2R3- type MYB- encoding genes
BnaA02G0229700ZS	M_WCS417_30m	M_Control	1905.43	1046.71	1476.07	0.864413	0.117831	7.33602	2.20035e-13	1.14009e-11	Normal	M_WCS417_30m-M_Control	RNA	AT1G78080	WIND1	Encodes a member of the DREB subfamily A-6 of ERF/AP2 transcription factor family (RAP2.4). The protein contains one AP2 domain. Role in mediating light and ethylene signaling.
BnaC03G0551700ZS	M_WCS417_30m	M_Control	379.357	808.265	593.811	-1.0916	0.148835	-7.33428	2.22914e-13	1.15383e-11	Down	M_WCS417_30m-M_Control	RNA	AT5G62620	GALT6	Galactosyltransferase family protein
BnaA08G0118600ZS	M_WCS417_30m	M_Control	235.201	550.8	393.001	-1.22731	0.167505	-7.32702	2.3533e-13	1.21685e-11	Down	M_WCS417_30m-M_Control	RNA	AT4G20200	--	Terpenoid cyclases/Protein prenyltransferases superfamily protein
BnaA07G0293000ZS	M_WCS417_30m	M_Control	364	130.848	247.424	1.47691	0.201623	7.32508	2.38748e-13	1.23326e-11	Up	M_WCS417_30m-M_Control	RNA	AT1G67480	--	Galactose oxidase/kelch repeat superfamily protein
BnaC03G0078400ZS	M_WCS417_30m	M_Control	446.82	170.457	308.638	1.39269	0.190183	7.32291	2.42658e-13	1.25218e-11	Up	M_WCS417_30m-M_Control	RNA	AT5G16370	AAE5	acyl activating enzyme 5
BnaA09G0188400ZS	M_WCS417_30m	M_Control	399.868	147.399	273.633	1.43751	0.196361	7.32072	2.46652e-13	1.2715e-11	Up	M_WCS417_30m-M_Control	RNA	AT5G42930	--	alpha/beta-Hydrolases superfamily protein
BnaA03G0212900ZS	M_WCS417_30m	M_Control	1291.01	2339.24	1815.13	-0.857757	0.117289	-7.3132	2.60859e-13	1.34337e-11	Normal	M_WCS417_30m-M_Control	RNA	AT2G43710	SSI2	Encodes a stearoyl-ACP desaturase, involved in fatty acid desaturation. The ssi2 mutants have increased 18:0 and reduced 18:1 fatty acids. Exogenous application of glycerol to wild type plants mimics the ssi2 mutant phenotype. The altered 18:1 fatty acid content in the ssi2 mutants has an impact on SA- and JA-mediated defense signaling. ssi2 mutants resulted in hyper-resistance to green peach aph…
BnaA07G0388700ZS	M_WCS417_30m	M_Control	1206.03	627.379	916.703	0.942993	0.129003	7.30987	2.67399e-13	1.37565e-11	Normal	M_WCS417_30m-M_Control	RNA	AT1G80460	NHO1	Encodes a protein similar to glycerol kinase, which converts glycerol to glycerol 3-phosphate and performs a rate-limiting step in glycerol metabolism. This gene is required for both general and specific resistance against bacteria and fungi. Arabidopsis thaliana glycerol kinase (GLR1) mRNA.Involved in flagellin-induced non-host resistance to Pseudomonas. Coronatine partially suppresses flagellin…
BnaC04G0265900ZS	M_WCS417_30m	M_Control	836.714	403.085	619.899	1.05417	0.144225	7.30924	2.68654e-13	1.38071e-11	Up	M_WCS417_30m-M_Control	RNA	AT3G61820	--	Eukaryotic aspartyl protease family protein
BnaA06G0350500ZS	M_WCS417_30m	M_Control	814.493	372.322	593.408	1.12918	0.154519	7.30774	2.71663e-13	1.39476e-11	Up	M_WCS417_30m-M_Control	RNA	AT5G27380	GSHB	Encodes a protein with similarity to glutathione synthetases, which catalyzes one of the early steps in glutathione biosynthesis. Two transcripts have been detected; the longer transcript is less abundant and the protein is localized to the chloroplast. The smaller transcript, in which the transit peptide is truncated, is localized to the cytosol.
BnaC02G0307900ZS	M_WCS417_30m	M_Control	500.646	1026.97	763.809	-1.03717	0.141989	-7.30461	2.78081e-13	1.42626e-11	Down	M_WCS417_30m-M_Control	RNA	AT1G77760	NR1	Encodes the cytosolic minor isoform of nitrate reductase (NR). Involved in the first step of nitrate assimilation, it contributes about 15% of the nitrate reductase activity in shoots. Similar to molybdopterin oxidoreductases at the N-terminus, and to FAD/NAD-binding cytochrome reductases at the C-terminus. Cofactors: FAD, heme iron (cytochrome B-557), and molybdenum-pterin.
BnaC01G0238300ZS	M_WCS417_30m	M_Control	122.837	16.972	69.9047	2.85169	0.390435	7.30388	2.79592e-13	1.43256e-11	Up	M_WCS417_30m-M_Control	RNA	AT4G16447	--	--
BnaA05G0334600ZS	M_WCS417_30m	M_Control	3107.2	1776.14	2441.67	0.806595	0.110462	7.30202	2.83485e-13	1.45104e-11	Normal	M_WCS417_30m-M_Control	RNA	AT3G22600	LTPG5	Bifunctional inhibitor/lipid-transfer protein/seed storage 2S albumin superfamily protein
BnaC06G0362100ZS	M_WCS417_30m	M_Control	217.764	57.1951	137.48	1.93106	0.2645	7.30078	2.86112e-13	1.46301e-11	Up	M_WCS417_30m-M_Control	RNA	AT1G66620	--	Protein with RING/U-box and TRAF-like domains
BnaA09G0493700ZS	M_WCS417_30m	M_Control	630.955	283.289	457.122	1.15489	0.158244	7.29819	2.9166e-13	1.48988e-11	Up	M_WCS417_30m-M_Control	RNA	AT3G53160	UGT73C7	UDP-glucosyl transferase 73C7
BnaA01G0017500ZS	M_WCS417_30m	M_Control	2490.71	1387.28	1939	0.844721	0.115758	7.29731	2.93587e-13	1.49821e-11	Normal	M_WCS417_30m-M_Control	RNA	AT4G36990	TBF1	Encodes a protein whose sequence is similar to heat shock factors that regulate the expression of heat shock proteins. Transcript level is increased in response to heat shock. However, overexpression of this gene did not result in the increase of decrease of heat shock proteins.
BnaC02G0027900ZS	M_WCS417_30m	M_Control	1485.88	790.434	1138.15	0.911028	0.124909	7.29355	3.01886e-13	1.53901e-11	Normal	M_WCS417_30m-M_Control	RNA	AT5G07440	GDH2	Encodes the alpha-subunit of the glutamate dehydrogenase. The enzyme is almost exclusively found in the mitochondria of stem and leaf companion cells.
BnaC03G0772700ZS	M_WCS417_30m	M_Control	10044.9	6138.81	8091.86	0.710433	0.0974204	7.29245	3.04378e-13	1.55016e-11	Normal	M_WCS417_30m-M_Control	RNA	AT4G30530	GGP1	Encodes a gamma-glutamyl peptidase, outside the GGT family, that can hydrolyze gamma-glutamyl peptide bonds.
BnaC05G0099700ZS	M_WCS417_30m	M_Control	453.187	181.4	317.293	1.32009	0.181086	7.28986	3.10282e-13	1.57864e-11	Up	M_WCS417_30m-M_Control	RNA	AT1G12780	UGE1	Encodes a UDP-glucose epimerase that catalyzes the interconversion of the sugar nucleotides UDP-glucose UDP-galactose via a UDP-4-keto-hexose intermediate. Responsive to stress.
BnaC09G0619000ZS	M_WCS417_30m	M_Control	646.67	282.764	464.717	1.1918	0.163567	7.28632	3.18539e-13	1.61902e-11	Up	M_WCS417_30m-M_Control	RNA	AT5G02230	--	Haloacid dehalogenase-like hydrolase (HAD) superfamily protein
BnaA05G0324000ZS	M_WCS417_30m	M_Control	540.11	1060.55	800.328	-0.97346	0.133613	-7.28565	3.20115e-13	1.6254e-11	Normal	M_WCS417_30m-M_Control	RNA	AT1G32470	GDC-H1	Single hybrid motif superfamily protein
BnaC03G0610000ZS	M_WCS417_30m	M_Control	535.069	1070.95	803.008	-1.00066	0.13742	-7.28175	3.29516e-13	1.67146e-11	Down	M_WCS417_30m-M_Control	RNA	AT1G53540	HSP17.6C	HSP20-like chaperones superfamily protein
BnaC09G0432000ZS	M_WCS417_30m	M_Control	152.923	400.351	276.637	-1.38854	0.19079	-7.27788	3.39114e-13	1.71843e-11	Down	M_WCS417_30m-M_Control	RNA	AT5G59730	EXO70H7	A member of EXO70 gene family, putative exocyst subunits, conserved in land plants. Arabidopsis thaliana contains 23 putative EXO70 genes, which can be classified into eight clusters on the phylogenetic tree.
BnaC08G0451600ZS	M_WCS417_30m	M_Control	93.9898	292.027	193.008	-1.63617	0.224898	-7.27515	3.4603e-13	1.75172e-11	Down	M_WCS417_30m-M_Control	RNA	AT2G21560	--	--
BnaC01G0218600ZS	M_WCS417_30m	M_Control	23.9716	145.242	84.6066	-2.60272	0.357977	-7.27064	3.57785e-13	1.80942e-11	Down	M_WCS417_30m-M_Control	RNA	AT4G27657	--	--
BnaC06G0439300ZS	M_WCS417_30m	M_Control	514.685	212.048	363.367	1.27759	0.175747	7.26949	3.60853e-13	1.82312e-11	Up	M_WCS417_30m-M_Control	RNA	AT1G78240	TSD2	Encodes TSD2 (TUMOROUS SHOOT DEVELOPMENT2), a putative methyltransferase with an essential role in cell adhesion and coordinated plant development.
BnaC05G0266600ZS	M_WCS417_30m	M_Control	3303.98	1931.71	2617.84	0.774323	0.106644	7.26082	3.84739e-13	1.94186e-11	Normal	M_WCS417_30m-M_Control	RNA	AT1G30700	AtBBE8	FAD-binding Berberine family protein
BnaA02G0213500ZS	M_WCS417_30m	M_Control	777.875	371.496	574.686	1.06593	0.14681	7.26061	3.85343e-13	1.94297e-11	Up	M_WCS417_30m-M_Control	RNA	AT1G74950	TIFY10B	TIFY domain/Divergent CCT motif family protein
BnaA03G0176400ZS	M_WCS417_30m	M_Control	2819.4	1600.71	2210.05	0.816769	0.112539	7.25766	3.93837e-13	1.98383e-11	Normal	M_WCS417_30m-M_Control	RNA	AT2G36880	MAT3	methionine adenosyltransferase 3
BnaC09G0580800ZS	M_WCS417_30m	M_Control	63.3405	237.202	150.271	-1.90388	0.262381	-7.25618	3.98164e-13	2.00363e-11	Down	M_WCS417_30m-M_Control	RNA	AT5G06760	LEA4-5	Encodes LEA4-5, a member of the Late Embryogenesis Abundant (LEA) proteins which typically accumulate in response to low water availability conditions imposed during development or by the environment. Most of the diverse set of LEA proteins can be grouped according to properties such as high hydrophilicity and high content of glycine or other small amino acids in what has been termed hydrophilins…
BnaA10G0142900ZS	M_WCS417_30m	M_Control	115.397	338.566	226.981	-1.55412	0.214284	-7.2526	4.08854e-13	2.05538e-11	Down	M_WCS417_30m-M_Control	RNA	AT5G58700	PLC4	phosphatidylinositol-speciwc phospholipase C4
BnaA07G0083300ZS	M_WCS417_30m	M_Control	741.372	341.404	541.388	1.11793	0.154197	7.24997	4.16865e-13	2.09358e-11	Up	M_WCS417_30m-M_Control	RNA	AT1G30720	AtBBE10	FAD-binding Berberine family protein
BnaC01G0347200ZS	M_WCS417_30m	M_Control	439.148	893.077	666.113	-1.02422	0.141285	-7.24934	4.18816e-13	2.1013e-11	Down	M_WCS417_30m-M_Control	RNA	AT1G61890	--	MATE efflux family protein
BnaA09G0506500ZS	M_WCS417_30m	M_Control	708.475	1369.45	1038.96	-0.951034	0.131314	-7.24244	4.40669e-13	2.20875e-11	Normal	M_WCS417_30m-M_Control	RNA	AT3G54810	GATA8	Encodes a protein containing a GATA type zinc finger domain that is expressed in the embryo axis and involved in germination. Mutants have a reduced rate of germination even when stratified.
BnaA03G0445900ZS	M_WCS417_30m	M_Control	333.114	115.565	224.339	1.52568	0.210734	7.23984	4.49228e-13	2.24942e-11	Up	M_WCS417_30m-M_Control	RNA	AT4G18170	WRKY28	member of WRKY Transcription Factor; Group II-c. Involved in the activation of salicylic acid biosynthesis genes ICS1 and PBS3.
BnaC03G0154400ZS	M_WCS417_30m	M_Control	243.357	61.25	152.303	1.98511	0.27443	7.23357	4.7045e-13	2.35337e-11	Up	M_WCS417_30m-M_Control	RNA	AT3G24255	--	RNA-directed DNA polymerase (reverse transcriptase)-related family protein
BnaA09G0618300ZS	M_WCS417_30m	M_Control	257.998	62.9646	160.481	2.04362	0.282573	7.23216	4.75366e-13	2.37561e-11	Up	M_WCS417_30m-M_Control	RNA	AT1G17340	SAC5	Phosphoinositide phosphatase family protein
BnaA04G0116900ZS	M_WCS417_30m	M_Control	1079.2	537.166	808.183	1.00648	0.139233	7.22873	4.87527e-13	2.43398e-11	Up	M_WCS417_30m-M_Control	RNA	AT5G40370	GRXC2	Glutaredoxin family protein
BnaC04G0531500ZS	M_WCS417_30m	M_Control	94.1324	2.98371	48.558	5.00413	0.692978	7.2212	5.15313e-13	2.5682e-11	Up	M_WCS417_30m-M_Control	RNA	AT2G34180	WL2	Encodes CBL-interacting protein kinase 13 (CIPK13).
BnaC06G0457100ZS	M_WCS417_30m	M_Control	224.695	62.2842	143.49	1.85007	0.256201	7.22117	5.15425e-13	2.5682e-11	Up	M_WCS417_30m-M_Control	RNA	AT1G80450	--	VQ motif-containing protein
BnaC09G0574700ZS	M_WCS417_30m	M_Control	56.8213	215.042	135.932	-1.91902	0.266013	-7.21403	5.43216e-13	2.70402e-11	Down	M_WCS417_30m-M_Control	RNA	AT5G07240	IQD24	IQ-domain 24
BnaC05G0360600ZS	M_WCS417_30m	M_Control	167.51	36.1063	101.808	2.21512	0.307251	7.20949	5.61615e-13	2.79286e-11	Up	M_WCS417_30m-M_Control	RNA	AT3G22250	--	UDP-Glycosyltransferase superfamily protein
BnaA02G0044600ZS	M_WCS417_30m	M_Control	500.893	211.648	356.27	1.24323	0.172635	7.20151	5.95497e-13	2.95555e-11	Up	M_WCS417_30m-M_Control	RNA	AT5G12340	--	--
BnaC07G0420900ZS	M_WCS417_30m	M_Control	750.529	357.352	553.94	1.07025	0.148629	7.2008	5.98592e-13	2.96801e-11	Up	M_WCS417_30m-M_Control	RNA	AT4G18205	PUP21	Nucleotide-sugar transporter family protein
BnaA10G0167200ZS	M_WCS417_30m	M_Control	1968.85	1093.74	1531.29	0.848368	0.11789	7.19627	6.18829e-13	3.06535e-11	Normal	M_WCS417_30m-M_Control	RNA	AT5G22060	J2	Co-chaperonin similar to E. coli DnaJ
BnaC05G0459900ZS	M_WCS417_30m	M_Control	606.158	270.594	438.376	1.16449	0.161916	7.19193	6.38814e-13	3.16126e-11	Up	M_WCS417_30m-M_Control	RNA	AT5G40990	GLIP1	Component of plant resistance. Contains lipase signature motif and GDSL domain. Directly interferes with the fungal infection process by acting on fungal cell walls through its action as a antimicrobial compound. Critical component for both local and systemic resistance responses in the incompatible interaction with Alternaria brassicicola in the ethylene-dependent pathway.
BnaA09G0265200ZS	M_WCS417_30m	M_Control	7928.51	4829.6	6379.05	0.715107	0.099436	7.19162	6.40257e-13	3.16531e-11	Normal	M_WCS417_30m-M_Control	RNA	AT4G08770	Prx37	Encodes a putative apoplastic peroxidase Prx37. Primarily expressed in the vascular bundles. Overexpression renders a dwarf phenotype with smaller plants and delayed development. Plants overexpressing Prx37 also shows an increase in the amount of esterified phenolic material associated with their walls.
BnaC05G0224800ZS	M_WCS417_30m	M_Control	978.201	479.419	728.81	1.02958	0.143185	7.19056	6.45273e-13	3.18475e-11	Up	M_WCS417_30m-M_Control	RNA	AT1G25560	TEM1	Encodes a member of the RAV transcription factor family that contains AP2 and B3 binding domains. Involved in the regulation of flowering under long days. Loss of function results in early flowering. Overexpression causes late flowering and repression of expression of FT. Novel transcriptional regulator involved in ethylene signaling. Promoter bound by EIN3. EDF1 in turn, binds to promoter elemen…
BnaC05G0163700ZS	M_WCS417_30m	M_Control	203.225	51.9501	127.588	1.97156	0.274189	7.19052	6.45448e-13	3.18475e-11	Up	M_WCS417_30m-M_Control	RNA	AT1G19400	E-4PDHase	Erythronate-4-phosphate dehydrogenase family protein
BnaA05G0086700ZS	M_WCS417_30m	M_Control	514.922	218.587	366.755	1.23568	0.171873	7.1895	6.50268e-13	3.20542e-11	Up	M_WCS417_30m-M_Control	RNA	AT2G36310	URH1	Encodes a cytoplasmic nucleoside hydrolase. It has the highest levels of activity with uridine followed by xanthosine. It shows little activity with inosine and none with cytidine. Mutant analyses indicate that it plays a role in purine and pyrimidine catabolism.
BnaC05G0096000ZS	M_WCS417_30m	M_Control	178.237	449.691	313.964	-1.33423	0.185603	-7.18862	6.54491e-13	3.2231e-11	Down	M_WCS417_30m-M_Control	RNA	AT1G13260	RAV1	Encodes an AP2/B3 domain transcription factor which is upregulated in response to low temperature. It contains a B3 DNA binding domain. It has circadian regulation and may function as a negative growth regulator.
BnaA05G0165400ZS	M_WCS417_30m	M_Control	1735.22	941.091	1338.16	0.883298	0.122984	7.1822	6.85971e-13	3.37485e-11	Normal	M_WCS417_30m-M_Control	RNA	AT1G52720	--	--
BnaC07G0401900ZS	M_WCS417_30m	M_Control	4810.82	2892.79	3851.8	0.733844	0.102285	7.1745	7.25711e-13	3.5669e-11	Normal	M_WCS417_30m-M_Control	RNA	AT4G15610	CASPL1D1	Uncharacterised protein family (UPF0497)
BnaC08G0083800ZS	M_WCS417_30m	M_Control	4698.64	2800.12	3749.38	0.746811	0.104099	7.17402	7.28295e-13	3.57613e-11	Normal	M_WCS417_30m-M_Control	RNA	AT4G31500	SUR2	Encodes an oxime-metabolizing enzyme in the biosynthetic pathway of glucosinolates. Is required for phytochrome signal transduction in red light. Mutation confers auxin overproduction.
BnaA09G0101800ZS	M_WCS417_30m	M_Control	2050.93	1144.87	1597.9	0.840792	0.117267	7.1699	7.50545e-13	3.68181e-11	Normal	M_WCS417_30m-M_Control	RNA	AT5G66120	--	3-dehydroquinate synthase, putative
BnaC09G0573100ZS	M_WCS417_30m	M_Control	216.811	510.983	363.897	-1.23663	0.172489	-7.16935	7.5356e-13	3.69303e-11	Down	M_WCS417_30m-M_Control	RNA	AT5G58380	SNRK3.8	Encodes a CBL-interacting protein kinase with similarity to SOS protein kinase.
BnaA05G0155300ZS	M_WCS417_30m	M_Control	1037.1	528.719	782.907	0.971453	0.135519	7.16838	7.58918e-13	3.71569e-11	Normal	M_WCS417_30m-M_Control	RNA	AT1G55210	--	Disease resistance-responsive (dirigent-like protein) family protein
BnaA03G0513900ZS	M_WCS417_30m	M_Control	1094.08	564.534	829.304	0.954939	0.133237	7.1672	7.65474e-13	3.74417e-11	Normal	M_WCS417_30m-M_Control	RNA	AT4G29900	CIF1	--
BnaC09G0592400ZS	M_WCS417_30m	M_Control	2366.25	1290.96	1828.6	0.874026	0.121986	7.16499	7.77911e-13	3.80134e-11	Normal	M_WCS417_30m-M_Control	RNA	AT5G05440	RCAR8	Encodes a member of the PYR (pyrabactin resistance )/PYL(PYR1-like)/RCAR (regulatory components of ABA receptor) family proteins with 14 members. PYR/PYL/RCAR family proteins function as abscisic acid sensors. Mediate ABA-dependent regulation of protein phosphatase 2Cs ABI1 and ABI2.
BnaA10G0010900ZS	M_WCS417_30m	M_Control	112.189	330.986	221.588	-1.55937	0.217803	-7.15954	8.09453e-13	3.95166e-11	Down	M_WCS417_30m-M_Control	RNA	--	--	--
BnaC09G0365800ZS	M_WCS417_30m	M_Control	497.651	197.187	347.419	1.33401	0.186459	7.15442	8.40283e-13	4.09822e-11	Up	M_WCS417_30m-M_Control	RNA	AT5G54170	--	Polyketide cyclase/dehydrase and lipid transport superfamily protein
BnaA06G0043900ZS	M_WCS417_30m	M_Control	788.03	1469.58	1128.8	-0.899323	0.125811	-7.1482	8.79216e-13	4.28398e-11	Normal	M_WCS417_30m-M_Control	RNA	AT1G47960	CIF1	Plant cell wall (CWI) and vacuolar invertases (VI) play important roles in carbohydrate metabolism, stress responses and sugar signaling. This protein may inhibit their activity.
BnaC01G0219300ZS	M_WCS417_30m	M_Control	144.102	385.338	264.72	-1.41818	0.198416	-7.1475	8.83732e-13	4.30185e-11	Down	M_WCS417_30m-M_Control	RNA	AT4G27670	HSP21	Encodes Hsp21, a chloroplast located small heat shock protein. A structure model of Hsp21, obtained by homology modeling, single-particle electron microscopy, and lysine-specific chemical crosslinking, shows that the Hsp21 subunits are arranged in two hexameric discs, rotated by 25 degree in relation to each other.
BnaA02G0190000ZS	M_WCS417_30m	M_Control	1173.41	609.207	891.311	0.9451	0.132234	7.14721	8.8562e-13	4.3069e-11	Normal	M_WCS417_30m-M_Control	RNA	AT1G70690	PDLP5	Encodes a plasmodesmal protein that may be involved in the intercellular movement of molecules through the plasmodesmata. The protein has two DUF26 domains and a single transmembrane domain.
BnaA02G0419900ZS	M_WCS417_30m	M_Control	248.715	70.7257	159.72	1.81836	0.254498	7.14488	9.00737e-13	4.37622e-11	Up	M_WCS417_30m-M_Control	RNA	AT5G65980	PILS7	Auxin efflux carrier family protein
BnaC02G0358600ZS	M_WCS417_30m	M_Control	335.884	121.023	228.454	1.47342	0.206271	7.14314	9.12235e-13	4.42783e-11	Up	M_WCS417_30m-M_Control	RNA	AT4G12090	--	Cornichon family protein
BnaC01G0348700ZS	M_WCS417_30m	M_Control	22.5025	148.324	85.4133	-2.72639	0.381692	-7.14291	9.1378e-13	4.43109e-11	Down	M_WCS417_30m-M_Control	RNA	AT3G24310	MYB71	snapdragon myb protein 305 homolog (myb)
BnaC03G0203000ZS	M_WCS417_30m	M_Control	666.94	304.731	485.836	1.129	0.158159	7.1384	9.44269e-13	4.57456e-11	Up	M_WCS417_30m-M_Control	RNA	AT2G36320	--	A20/AN1-like zinc finger family protein
BnaA08G0003300ZS	M_WCS417_30m	M_Control	200.565	50.864	125.715	1.97583	0.276825	7.13747	9.50678e-13	4.60121e-11	Up	M_WCS417_30m-M_Control	RNA	AT1G55740	SIP1	seed imbibition 1
BnaC09G0590700ZS	M_WCS417_30m	M_Control	830.337	407.711	619.024	1.02641	0.143831	7.13624	9.59155e-13	4.63781e-11	Up	M_WCS417_30m-M_Control	RNA	AT5G05730	WEI2	ASA1 encodes the alpha subunit of anthranilate synthase, which catalyzes the rate-limiting step of tryptophan synthesis. ASA1 is induced by ethylene, and forms a link between ethylene signalling and auxin synthesis in roots.
BnaA09G0720700ZS	M_WCS417_30m	M_Control	98.1028	293.736	195.92	-1.58209	0.221752	-7.13449	9.71491e-13	4.69057e-11	Down	M_WCS417_30m-M_Control	RNA	AT2G44840	ERF13	encodes a member of the ERF (ethylene response factor) subfamily B-3 of ERF/AP2 transcription factor family. The protein contains one AP2 domain. There are 18 members in this subfamily including ATERF-1, ATERF-2, AND ATERF-5.
BnaC03G0563400ZS	M_WCS417_30m	M_Control	432.629	880.207	656.418	-1.02515	0.143691	-7.13443	9.71919e-13	4.69057e-11	Down	M_WCS417_30m-M_Control	RNA	AT3G49530	NTL6	Transcription factor that serves as a molecular link between cold signals and pathogen resistance responses. Undergoes proteolytic processing triggered by cold-induced changes in membrane fluidity.
BnaA07G0189700ZS	M_WCS417_30m	M_Control	180.548	468.622	324.585	-1.37457	0.192773	-7.1305	1.00003e-12	4.82165e-11	Down	M_WCS417_30m-M_Control	RNA	AT3G54810	GATA8	Encodes a protein containing a GATA type zinc finger domain that is expressed in the embryo axis and involved in germination. Mutants have a reduced rate of germination even when stratified.
BnaC02G0428400ZS	M_WCS417_30m	M_Control	64.8888	233.199	149.044	-1.84392	0.258603	-7.1303	1.00152e-12	4.82424e-11	Down	M_WCS417_30m-M_Control	RNA	AT2G01610	--	Plant invertase/pectin methylesterase inhibitor superfamily protein
BnaC03G0361700ZS	M_WCS417_30m	M_Control	140.774	25.1017	82.938	2.49504	0.350351	7.12155	1.06719e-12	5.13567e-11	Up	M_WCS417_30m-M_Control	RNA	AT3G06070	--	--
BnaA09G0228200ZS	M_WCS417_30m	M_Control	154.614	401.068	277.841	-1.37591	0.19335	-7.11616	1.10977e-12	5.33551e-11	Down	M_WCS417_30m-M_Control	RNA	AT3G25790	NIGT1.3	myb-like transcription factor family protein
BnaA06G0441000ZS	M_WCS417_30m	M_Control	201.914	48.7636	125.339	2.05622	0.288977	7.11553	1.11484e-12	5.35481e-11	Up	M_WCS417_30m-M_Control	RNA	AT5G43650	BHLH92	basic helix-loop-helix (bHLH) DNA-binding superfamily protein
BnaC05G0127900ZS	M_WCS417_30m	M_Control	906.168	452.961	679.565	0.999978	0.140578	7.11333	1.13278e-12	5.43584e-11	Normal	M_WCS417_30m-M_Control	RNA	AT1G15380	GLYI4	Lactoylglutathione lyase / glyoxalase I family protein
BnaA08G0194300ZS	M_WCS417_30m	M_Control	527.508	1028.03	777.768	-0.962859	0.135383	-7.1121	1.14287e-12	5.47909e-11	Normal	M_WCS417_30m-M_Control	RNA	AT4G39675	--	--
BnaA02G0371700ZS	M_WCS417_30m	M_Control	497.382	206.756	352.069	1.26557	0.178061	7.10748	1.18182e-12	5.66045e-11	Up	M_WCS417_30m-M_Control	RNA	AT5G27420	CNI1	Encodes CNI1 (Carbon/Nitrogen Insensitive1) (also named as ATL31), a RING type ubiquitin ligase that functions in the Carbon/Nitrogen response for growth phase transition in Arabidopsis seedlings.
BnaA04G0108400ZS	M_WCS417_30m	M_Control	3258.34	1909.72	2584.03	0.770617	0.108626	7.09421	1.30089e-12	6.219e-11	Normal	M_WCS417_30m-M_Control	RNA	AT3G29075	--	glycine-rich protein
BnaA08G0171900ZS	M_WCS417_30m	M_Control	272.322	86.2578	179.29	1.66175	0.234265	7.09346	1.30797e-12	6.24346e-11	Up	M_WCS417_30m-M_Control	RNA	AT4G25640	FFT	Encodes a multidrug and toxin efflux family transporter. Involved in flavonoid metabolism, affecting Root growth, seed development and germination, and pollen development, release and viability.
BnaC07G0541500ZS	M_WCS417_30m	M_Control	1116.53	581.61	849.07	0.941236	0.132692	7.09341	1.30847e-12	6.24346e-11	Normal	M_WCS417_30m-M_Control	RNA	AT4G39950	CYP79B2	Belongs to cytochrome P450 and is involved in tryptophan metabolism. Converts Trp to indo-3-acetaldoxime (IAOx), a precursor to IAA and indole glucosinolates.
BnaA09G0568300ZS	M_WCS417_30m	M_Control	1189.72	630.202	909.96	0.91663	0.129228	7.09313	1.31113e-12	6.25027e-11	Normal	M_WCS417_30m-M_Control	RNA	AT3G63010	GID1B	Encodes a gibberellin (GA) receptor ortholog of the rice GA receptor gene (OsGID1). Has GA-binding activity, showing higher affinity to GA4. Interacts with DELLA proteins in vivo in the presence of GA4.
BnaA06G0117300ZS	M_WCS417_30m	M_Control	1263.11	670.898	967.004	0.913222	0.128818	7.08924	1.34852e-12	6.42244e-11	Normal	M_WCS417_30m-M_Control	RNA	AT1G17147	--	VQ motif-containing protein
BnaA10G0228800ZS	M_WCS417_30m	M_Control	639.251	279.37	459.31	1.19244	0.168214	7.08885	1.35229e-12	6.43435e-11	Up	M_WCS417_30m-M_Control	RNA	AT5G12340	--	--
BnaA05G0451300ZS	M_WCS417_30m	M_Control	2531.23	4232.62	3381.92	-0.741797	0.104656	-7.08793	1.36136e-12	6.47143e-11	Normal	M_WCS417_30m-M_Control	RNA	AT3G08720	S6K2	Encodes a ribosomal-protein S6 kinase. Gene expression is induced by cold and salt (NaCl). Activation of AtS6k is regulated by 1-naphthylacetic acid and kinetin, at least in part, via a lipid kinase-dependent pathway. Phosphorylates specifically mammalian and plant S6 at 25 degrees C but not at 37 degrees C. Involved in translational up-regulation of ribosomal proteins.
BnaC09G0545900ZS	M_WCS417_30m	M_Control	256.855	579.182	418.019	-1.17277	0.165499	-7.08628	1.37766e-12	6.54276e-11	Down	M_WCS417_30m-M_Control	RNA	AT5G11090	--	serine-rich protein-related
BnaC06G0373700ZS	M_WCS417_30m	M_Control	197.254	50.8689	124.061	1.95748	0.276352	7.08326	1.40797e-12	6.68048e-11	Up	M_WCS417_30m-M_Control	RNA	AT1G70700	TIFY7	JAZ9 is a protein presumed to be involved in jasmonate signaling. JAZ9 transcript levels rise in response to a jasmonate stimulus. JAZ9 can interact with the COI1 F-box subunit of an SCF E3 ubiquitin ligase in a yeast-two-hybrid assay only in the presence of jasmonate-isoleucine (JA-ILE) or coronatine. The Jas domain appears to be important for JAZ9-COI1 interactions in the presence of coronatine…
BnaC07G0178800ZS	M_WCS417_30m	M_Control	394.213	143.849	269.031	1.45155	0.204931	7.0831	1.40962e-12	6.68205e-11	Up	M_WCS417_30m-M_Control	RNA	AT1G22640	MYB3	MYB-type transcription factor (MYB3) that represses phenylpropanoid biosynthesis gene expression
BnaA01G0022300ZS	M_WCS417_30m	M_Control	1035.75	1844.86	1440.3	-0.832697	0.117585	-7.08166	1.42436e-12	6.74343e-11	Normal	M_WCS417_30m-M_Control	RNA	AT4G36520	AUXILIN-LIKE4	Chaperone DnaJ-domain superfamily protein
BnaA05G0048000ZS	M_WCS417_30m	M_Control	967.682	494.473	731.078	0.968623	0.136781	7.08158	1.42523e-12	6.74343e-11	Normal	M_WCS417_30m-M_Control	RNA	AT2G44790	UCC2	Encodes a uclacyanin, a protein precursor that is closely related to precursors of stellacyanins and a blue copper protein from pea pods.
BnaC07G0221400ZS	M_WCS417_30m	M_Control	328.475	116.293	222.384	1.49925	0.211885	7.07574	1.48649e-12	7.02673e-11	Up	M_WCS417_30m-M_Control	RNA	AT5G43650	BHLH92	basic helix-loop-helix (bHLH) DNA-binding superfamily protein
BnaC05G0102700ZS	M_WCS417_30m	M_Control	157.663	28.7459	93.2045	2.44362	0.346005	7.06239	1.63666e-12	7.72936e-11	Up	M_WCS417_30m-M_Control	RNA	AT1G12320	--	Protein of unknown function (DUF1442)
BnaC04G0601000ZS	M_WCS417_30m	M_Control	257.703	81.4705	169.587	1.66195	0.235564	7.05519	1.72365e-12	8.1326e-11	Up	M_WCS417_30m-M_Control	RNA	AT2G44670	--	Protein of unknown function (DUF581)
BnaC03G0633000ZS	M_WCS417_30m	M_Control	2071.09	1168.94	1620.02	0.825561	0.117081	7.05122	1.77353e-12	8.36019e-11	Normal	M_WCS417_30m-M_Control	RNA	AT1G25220	WEI7	Catalyzes the first step of tryptophan biosynthesis: Chorismate L-Glutamine = Anthranilate Pyruvate L-Glutamate. Functions as a heterocomplex with anthranilate synthase alpha subunit (ASA1 or ASA2).
BnaC02G0506600ZS	M_WCS417_30m	M_Control	589.196	265.599	427.398	1.14944	0.163115	7.04684	1.8303e-12	8.61977e-11	Up	M_WCS417_30m-M_Control	RNA	AT5G25930	NUT	Protein kinase family protein with leucine-rich repeat domain
BnaC05G0229800ZS	M_WCS417_30m	M_Control	1209.77	627.302	918.534	0.946607	0.13436	7.04532	1.85034e-12	8.70605e-11	Normal	M_WCS417_30m-M_Control	RNA	AT1G25220	WEI7	Catalyzes the first step of tryptophan biosynthesis: Chorismate L-Glutamine = Anthranilate Pyruvate L-Glutamate. Functions as a heterocomplex with anthranilate synthase alpha subunit (ASA1 or ASA2).
BnaA02G0406600ZS	M_WCS417_30m	M_Control	194.857	49.5799	122.218	1.97337	0.280201	7.04269	1.88558e-12	8.86363e-11	Up	M_WCS417_30m-M_Control	RNA	AT5G64000	SAL2	3'(2'),5'-bisphosphate nucleotidase
BnaC07G0141000ZS	M_WCS417_30m	M_Control	164.008	33.1695	98.5888	2.29685	0.326316	7.03874	1.9398e-12	9.11003e-11	Up	M_WCS417_30m-M_Control	RNA	AT1G29160	COG1	Dof-type zinc finger DNA-binding family protein
BnaA07G0287800ZS	M_WCS417_30m	M_Control	370.877	762.188	566.533	-1.03904	0.147662	-7.03664	1.96929e-12	9.23998e-11	Down	M_WCS417_30m-M_Control	RNA	AT1G66500	--	Pre-mRNA cleavage complex II
BnaC07G0336400ZS	M_WCS417_30m	M_Control	291.269	656.823	474.046	-1.17336	0.16682	-7.03373	2.01086e-12	9.42628e-11	Down	M_WCS417_30m-M_Control	RNA	AT5G49520	WRKY48	Encodes WRKY48, a member of the WRKY Transcription Factor. WRKY48 is a stress- and pathogen-induced transcriptional activator that represses plant basal defense.
BnaA02G0358100ZS	M_WCS417_30m	M_Control	506.57	219.569	363.07	1.20666	0.171572	7.03297	2.02183e-12	9.46898e-11	Up	M_WCS417_30m-M_Control	RNA	AT3G30775	PRODH	Encodes a proline oxidase that is predicted to localize to the inner mitochondrial membrane, its mRNA expression induced by high levels of Al and by osmotic stress. The promoter contains an L-proline-inducible element.
BnaA03G0274400ZS	M_WCS417_30m	M_Control	3314.6	1974.35	2644.47	0.74746	0.106333	7.02944	2.0736e-12	9.70245e-11	Normal	M_WCS417_30m-M_Control	RNA	AT4G01850	SAM2	S-adenosylmethionine synthetase 2
BnaC02G0248300ZS	M_WCS417_30m	M_Control	1562.91	860.454	1211.68	0.860678	0.122475	7.02738	2.1045e-12	9.83529e-11	Normal	M_WCS417_30m-M_Control	RNA	AT1G70410	CA4	Encodes a putative beta-carbonic anhydrase betaCA4. Together with betaCA1 (At3g01500) regulates CO2-controlled stomatal movements in guard cells.
BnaA07G0034400ZS	M_WCS417_30m	M_Control	355.99	134.138	245.064	1.40876	0.200469	7.02729	2.10587e-12	9.83529e-11	Up	M_WCS417_30m-M_Control	RNA	AT5G01830	PUB16	ARM repeat superfamily protein
BnaA05G0063500ZS	M_WCS417_30m	M_Control	68.1597	233.511	150.835	-1.77658	0.252881	-7.02533	2.13556e-12	9.96476e-11	Down	M_WCS417_30m-M_Control	RNA	AT2G39800	P5CS1	delta1-pyrroline-5-carboxylate synthase 1
BnaA02G0130300ZS	M_WCS417_30m	M_Control	2098.92	1198.06	1648.49	0.80875	0.11515	7.02345	2.16456e-12	1.00908e-10	Normal	M_WCS417_30m-M_Control	RNA	AT5G55050	--	GDSL-like Lipase/Acylhydrolase superfamily protein
BnaA01G0354100ZS	M_WCS417_30m	M_Control	503.299	211.039	357.169	1.25595	0.178963	7.01794	2.25163e-12	1.04871e-10	Up	M_WCS417_30m-M_Control	RNA	AT3G14280	--	--
BnaA03G0345600ZS	M_WCS417_30m	M_Control	285.7	86.9183	186.309	1.71457	0.244523	7.01191	2.35084e-12	1.0929e-10	Up	M_WCS417_30m-M_Control	RNA	AT3G16350	NID1	Homeodomain-like superfamily protein
BnaC09G0095400ZS	M_WCS417_30m	M_Control	40.6704	178.02	109.345	-2.12893	0.303715	-7.00964	2.38939e-12	1.10981e-10	Down	M_WCS417_30m-M_Control	RNA	AT5G66985	HUP44	--
BnaC01G0499100ZS	M_WCS417_30m	M_Control	2295.92	1315.68	1805.8	0.802949	0.114553	7.00944	2.39275e-12	1.11035e-10	Normal	M_WCS417_30m-M_Control	RNA	AT3G02360	PGD2	6-phosphogluconate dehydrogenase family protein
BnaA07G0031900ZS	M_WCS417_30m	M_Control	253.749	79.3601	166.554	1.67626	0.239152	7.0092	2.39676e-12	1.11119e-10	Up	M_WCS417_30m-M_Control	RNA	AT2G17120	LYP1	Induction of chitin-responsive genes by chitin treatment is not blocked in the mutant.
BnaA06G0136800ZS	M_WCS417_30m	M_Control	1345.54	722.282	1033.91	0.897864	0.128257	7.0005	2.55046e-12	1.18137e-10	Normal	M_WCS417_30m-M_Control	RNA	AT1G19540	--	NmrA-like negative transcriptional regulator family protein
BnaA06G0306000ZS	M_WCS417_30m	M_Control	345.174	122.453	233.814	1.49181	0.213285	6.99446	2.66278e-12	1.23227e-10	Up	M_WCS417_30m-M_Control	RNA	AT5G65690	PEPCK	Encodes a putative phosphoenolpyruvate carboxykinase (ATP-dependent).
BnaA09G0096500ZS	M_WCS417_30m	M_Control	7.64648	92.2202	49.9333	-3.5953	0.514648	-6.98594	2.82957e-12	1.30827e-10	Down	M_WCS417_30m-M_Control	RNA	AT5G66985	HUP44	--
BnaA06G0392600ZS	M_WCS417_30m	M_Control	931.869	471.846	701.857	0.981822	0.140552	6.98546	2.8392e-12	1.31152e-10	Normal	M_WCS417_30m-M_Control	RNA	AT3G25900	HMT-1	Homocysteine S-methyltransferase family protein
BnaA01G0421800ZS	M_WCS417_30m	M_Control	382.811	786.547	584.679	-1.03942	0.148885	-6.98138	2.92303e-12	1.34901e-10	Down	M_WCS417_30m-M_Control	RNA	AT3G02040	SRG3	Encodes a member of the glycerophosphodiester phosphodiesterase (GDPD) family. Has glycerophosphodiester phosphodiesterase activity. Functions in maintaining cellular phosphate homeostasis under phosphate starvation.
BnaC04G0359300ZS	M_WCS417_30m	M_Control	178.142	437.024	307.583	-1.29423	0.185403	-6.98061	2.93891e-12	1.35511e-10	Down	M_WCS417_30m-M_Control	RNA	AT4G13770	REF2	Encodes a cytochrome p450 enzyme that catalyzes the initial conversion of aldoximes to thiohydroximates in the synthesis of glucosinolates not derived from tryptophan. Also has a role in auxin homeostasis.
BnaA06G0319600ZS	M_WCS417_30m	M_Control	567.622	249.35	408.486	1.18709	0.17006	6.98044	2.94262e-12	1.35558e-10	Up	M_WCS417_30m-M_Control	RNA	AT2G17120	LYP1	Induction of chitin-responsive genes by chitin treatment is not blocked in the mutant.
BnaA01G0007600ZS	M_WCS417_30m	M_Control	205.711	53.5879	129.649	1.93514	0.277267	6.97934	2.96579e-12	1.36502e-10	Up	M_WCS417_30m-M_Control	RNA	AT4G39780	ERF60	encodes a member of the DREB subfamily A-6 of ERF/AP2 transcription factor family. The protein contains one AP2 domain. There are 8 members in this subfamily including RAP2.4.
BnaC02G0162800ZS	M_WCS417_30m	M_Control	539.299	235.673	387.486	1.19557	0.171342	6.97772	3.00011e-12	1.37956e-10	Up	M_WCS417_30m-M_Control	RNA	AT5G55050	--	GDSL-like Lipase/Acylhydrolase superfamily protein
BnaA03G0045200ZS	M_WCS417_30m	M_Control	5557.01	3409.12	4483.07	0.704921	0.101125	6.97079	3.15172e-12	1.44796e-10	Normal	M_WCS417_30m-M_Control	RNA	AT5G11670	NADP-ME2	The malic enzyme (EC 1.1.1.40) encoded by AtNADP-ME2 is presumably a cytosolic enzyme involved in malate metabolism and possibly assisting the oxidative pentose phosphate pathway. AtNADP-ME2 counts for the major part of NADP-ME activity in mature tissues of Arabidopsis.
BnaA03G0020600ZS	M_WCS417_30m	M_Control	152.629	31.7346	92.1817	2.26697	0.325265	6.96962	3.17806e-12	1.45874e-10	Up	M_WCS417_30m-M_Control	RNA	AT5G05600	JOX2	2-oxoglutarate (2OG) and Fe(II)-dependent oxygenase superfamily protein
BnaA08G0019500ZS	M_WCS417_30m	M_Control	314.525	111.562	213.044	1.49744	0.214921	6.96737	3.22913e-12	1.48084e-10	Up	M_WCS417_30m-M_Control	RNA	AT1G52140	--	--
BnaA09G0216300ZS	M_WCS417_30m	M_Control	516.661	1019.88	768.27	-0.981065	0.140834	-6.9661	3.25857e-12	1.49299e-10	Normal	M_WCS417_30m-M_Control	RNA	AT2G01180	PAP1	Encodes phosphatidate phosphatase. Up-regulated by genotoxic stress (gamma ray or UV-B) and elicitor treatments with mastoparan and harpin. Expressed in roots and leaves.
BnaA03G0114000ZS	M_WCS417_30m	M_Control	531.447	232.741	382.094	1.19258	0.171213	6.96548	3.2729e-12	1.4982e-10	Up	M_WCS417_30m-M_Control	RNA	AT5G56870	BGAL4	beta-galactosidase 4
BnaC04G0568000ZS	M_WCS417_30m	M_Control	13.2286	105.798	59.5132	-3.00073	0.430841	-6.96482	3.28817e-12	1.50251e-10	Down	M_WCS417_30m-M_Control	RNA	AT2G39510	UMAMIT14	nodulin MtN21-like transporter family protein
BnaA03G0384700ZS	M_WCS417_30m	M_Control	427.62	175.645	301.632	1.28436	0.184407	6.96482	3.28823e-12	1.50251e-10	Up	M_WCS417_30m-M_Control	RNA	AT2G04400	IGPS	Aldolase-type TIM barrel family protein
BnaA05G0074900ZS	M_WCS417_30m	M_Control	1057.15	540.523	798.835	0.96865	0.139244	6.95647	3.48908e-12	1.59284e-10	Normal	M_WCS417_30m-M_Control	RNA	AT2G37970	SOUL2	SOUL heme-binding family protein
BnaC03G0100900ZS	M_WCS417_30m	M_Control	140.195	27.415	83.8048	2.35795	0.339521	6.94492	3.78673e-12	1.72717e-10	Up	M_WCS417_30m-M_Control	RNA	AT5G20400	--	encodes a protein whose sequence is similar to flavanone 3 hydroxylase from Malus.
BnaC04G0224000ZS	M_WCS417_30m	M_Control	265.477	85.5353	175.506	1.63544	0.235535	6.94353	3.82409e-12	1.74264e-10	Up	M_WCS417_30m-M_Control	RNA	AT1G58170	--	Disease resistance-responsive (dirigent-like protein) family protein
BnaC04G0425300ZS	M_WCS417_30m	M_Control	602.887	279.229	441.058	1.11056	0.15997	6.94226	3.85867e-12	1.75682e-10	Up	M_WCS417_30m-M_Control	RNA	AT5G40370	GRXC2	Glutaredoxin family protein
BnaA10G0119600ZS	M_WCS417_30m	M_Control	200.781	48.7536	124.767	2.03695	0.293437	6.94168	3.87456e-12	1.76247e-10	Up	M_WCS417_30m-M_Control	RNA	AT5G55970	DDR1	RING/U-box superfamily protein
BnaC04G0096700ZS	M_WCS417_30m	M_Control	4398.05	2678.11	3538.08	0.715696	0.103144	6.93879	3.95477e-12	1.79734e-10	Normal	M_WCS417_30m-M_Control	RNA	AT2G36880	MAT3	methionine adenosyltransferase 3
BnaA08G0036200ZS	M_WCS417_30m	M_Control	603.204	275.414	439.309	1.12984	0.162934	6.93435	4.08086e-12	1.85288e-10	Up	M_WCS417_30m-M_Control	RNA	AT1G48850	EMB1144	chorismate synthase, putative / 5-enolpyruvylshikimate-3-phosphate phospholyase, putative
BnaC08G0497700ZS	M_WCS417_30m	M_Control	1604.98	895.608	1250.3	0.841905	0.121413	6.93423	4.08429e-12	1.85288e-10	Normal	M_WCS417_30m-M_Control	RNA	AT1G13470	--	Protein of unknown function (DUF1262)
BnaA05G0436000ZS	M_WCS417_30m	M_Control	222.631	63.9269	143.279	1.79649	0.259234	6.92999	4.20863e-12	1.90759e-10	Up	M_WCS417_30m-M_Control	RNA	AT3G11170	FADD	Chloroplastic enzyme responsible for the synthesis of 16:3 and 18:3 fatty acids from galactolipids, sulpholipids and phosphatidylglycerol. Uses ferredoxin as electron donor. Gene expression is induced by wounding in shoot and root. The wound-response in shoot is independent of jasmonic acid mediated pathway whereas the root response is mediated by jasmonic acid.
BnaC04G0008600ZS	M_WCS417_30m	M_Control	902.815	1621.1	1261.96	-0.84463	0.121905	-6.92862	4.24973e-12	1.92449e-10	Normal	M_WCS417_30m-M_Control	RNA	AT3G62260	PP2C49	Protein phosphatase 2C family protein
BnaC06G0180700ZS	M_WCS417_30m	M_Control	869.364	1573.34	1221.35	-0.856094	0.123573	-6.92785	4.27288e-12	1.93325e-10	Normal	M_WCS417_30m-M_Control	RNA	AT3G52990	--	--
BnaC02G0188900ZS	M_WCS417_30m	M_Control	20.3273	123.077	71.7019	-2.59866	0.375229	-6.92553	4.34361e-12	1.9635e-10	Down	M_WCS417_30m-M_Control	RNA	AT5G52020	--	encodes a member of the DREB subfamily A-4 of ERF/AP2 transcription factor family. The protein contains one AP2 domain. There are 17 members in this subfamily including TINY.
BnaC08G0410300ZS	M_WCS417_30m	M_Control	723.571	1351.92	1037.75	-0.902236	0.130319	-6.9233	4.4125e-12	1.99286e-10	Normal	M_WCS417_30m-M_Control	RNA	AT3G62040	--	Haloacid dehalogenase-like hydrolase (HAD) superfamily protein
BnaC08G0474600ZS	M_WCS417_30m	M_Control	117.509	16.8161	67.1624	2.79318	0.403504	6.92231	4.44338e-12	2.00502e-10	Up	M_WCS417_30m-M_Control	RNA	AT1G17180	GSTU25	Encodes glutathione transferase belonging to the tau class of GSTs. Naming convention according to Wagner et al. (2002).
BnaC03G0594100ZS	M_WCS417_30m	M_Control	1102.13	1934.83	1518.48	-0.811769	0.117306	-6.92009	4.51342e-12	2.03481e-10	Normal	M_WCS417_30m-M_Control	RNA	AT3G43800	GSTU27	Encodes glutathione transferase belonging to the tau class of GSTs. Naming convention according to Wagner et al. (2002).
BnaC07G0165600ZS	M_WCS417_30m	M_Control	307.53	106.874	207.202	1.52358	0.220193	6.91931	4.53837e-12	2.04424e-10	Up	M_WCS417_30m-M_Control	RNA	AT1G26800	SNIPER2	RING/U-box superfamily protein
BnaC02G0323100ZS	M_WCS417_30m	M_Control	1148.7	2005.37	1577.03	-0.803905	0.116258	-6.91482	4.68457e-12	2.10822e-10	Normal	M_WCS417_30m-M_Control	RNA	AT1G80840	WRKY40	Pathogen-induced transcription factor. Binds W-box sequences in vitro. Forms protein complexes with itself and with WRKY40 and WRKY60. Coexpression with WRKY18 or WRKY60 made plants more susceptible to both P. syringae and B. cinerea. WRKY18, WRKY40, and WRKY60 have partially redundant roles in response to the hemibiotrophic bacterial pathogen Pseudomonas syringae and the necrotrophic fungal path…
BnaA06G0134600ZS	M_WCS417_30m	M_Control	462.699	189.623	326.161	1.28484	0.185837	6.91385	4.7169e-12	2.12089e-10	Up	M_WCS417_30m-M_Control	RNA	AT1G19320	--	Pathogenesis-related thaumatin superfamily protein
BnaA09G0664100ZS	M_WCS417_30m	M_Control	426.619	174.98	300.799	1.28722	0.186308	6.9091	4.87733e-12	2.19108e-10	Up	M_WCS417_30m-M_Control	RNA	AT1G08920	ESL1	Encodes ESL1, a transporter for monosaccharides.
BnaC02G0407300ZS	M_WCS417_30m	M_Control	247.581	563.9	405.74	-1.18727	0.171871	-6.90791	4.91834e-12	2.20754e-10	Down	M_WCS417_30m-M_Control	RNA	AT5G46295	--	--
BnaC05G0311300ZS	M_WCS417_30m	M_Control	1093.1	572.804	832.951	0.932103	0.134967	6.90614	4.98021e-12	2.23334e-10	Normal	M_WCS417_30m-M_Control	RNA	AT1G48850	EMB1144	chorismate synthase, putative / 5-enolpyruvylshikimate-3-phosphate phospholyase, putative
BnaA03G0428300ZS	M_WCS417_30m	M_Control	959.25	483.657	721.453	0.987046	0.142967	6.90402	5.05519e-12	2.26496e-10	Normal	M_WCS417_30m-M_Control	RNA	AT4G15610	CASPL1D1	Uncharacterised protein family (UPF0497)
BnaC03G0546500ZS	M_WCS417_30m	M_Control	60.6967	242.368	151.532	-1.99401	0.288898	-6.90212	5.12322e-12	2.29341e-10	Down	M_WCS417_30m-M_Control	RNA	AT5G63130	--	Octicosapeptide/Phox/Bem1p family protein
BnaC09G0437700ZS	M_WCS417_30m	M_Control	478.675	937.289	707.982	-0.969879	0.140603	-6.89801	5.27378e-12	2.35873e-10	Normal	M_WCS417_30m-M_Control	RNA	AT5G60300	P2K1	Lectin Receptor Kinase involved in protein-protein interactions with RGD-containing proteins as potential ligands. Role in cell wall-plasma membrane adhesion. Involved in Phytophthora resistance.
BnaA07G0042100ZS	M_WCS417_30m	M_Control	2030.65	1159.68	1595.17	0.807849	0.117129	6.89706	5.30882e-12	2.3723e-10	Normal	M_WCS417_30m-M_Control	RNA	AT2G15480	UGT73B5	UDP-glucosyl transferase 73B5
BnaC06G0024500ZS	M_WCS417_30m	M_Control	182.85	45.6759	114.263	2.00628	0.291149	6.8909	5.54392e-12	2.47518e-10	Up	M_WCS417_30m-M_Control	RNA	AT1G23730	BCA3	beta carbonic anhydrase 3
BnaC03G0192400ZS	M_WCS417_30m	M_Control	82.2462	254.642	168.444	-1.63021	0.236692	-6.88749	5.67847e-12	2.53302e-10	Down	M_WCS417_30m-M_Control	RNA	AT2G34600	TIFY5B	jasmonate-zim-domain protein 7
BnaA09G0640300ZS	M_WCS417_30m	M_Control	1335.12	719.246	1027.18	0.892651	0.129652	6.885	5.77877e-12	2.57549e-10	Normal	M_WCS417_30m-M_Control	RNA	AT1G13470	--	Protein of unknown function (DUF1262)
BnaC03G0456100ZS	M_WCS417_30m	M_Control	1909.99	1098.34	1504.17	0.798158	0.115974	6.88223	5.89238e-12	2.62382e-10	Normal	M_WCS417_30m-M_Control	RNA	AT3G22600	LTPG5	Bifunctional inhibitor/lipid-transfer protein/seed storage 2S albumin superfamily protein
BnaA07G0196700ZS	M_WCS417_30m	M_Control	1114.23	595.905	855.066	0.903109	0.131302	6.87813	6.0643e-12	2.698e-10	Normal	M_WCS417_30m-M_Control	RNA	AT3G56800	CAM3	encodes a calmodulin
BnaC07G0476700ZS	M_WCS417_30m	M_Control	696.136	331.896	514.016	1.06856	0.155441	6.87436	6.22682e-12	2.76788e-10	Up	M_WCS417_30m-M_Control	RNA	AT4G27520	ENODL2	early nodulin-like protein 2
BnaC03G0749000ZS	M_WCS417_30m	M_Control	4790.59	2937.75	3864.17	0.705555	0.102682	6.87125	6.36413e-12	2.82643e-10	Normal	M_WCS417_30m-M_Control	RNA	AT4G05050	UBQ11	polyubiquitin gene, belongs to a subtype group with UBQ10 and UBQ14. Various ecotypes of Arabidopsis have different numbers of ubiquitin repeats within this gene.
BnaA05G0044100ZS	M_WCS417_30m	M_Control	780.95	379.843	580.396	1.04098	0.151525	6.87002	6.41947e-12	2.84851e-10	Up	M_WCS417_30m-M_Control	RNA	AT2G44370	--	Cysteine/Histidine-rich C1 domain family protein
BnaC08G0462800ZS	M_WCS417_30m	M_Control	235.733	73.6525	154.693	1.67897	0.244438	6.8687	6.47908e-12	2.87245e-10	Up	M_WCS417_30m-M_Control	RNA	AT1G19400	E-4PDHase	Erythronate-4-phosphate dehydrogenase family protein
BnaA04G0064000ZS	M_WCS417_30m	M_Control	1664.31	2850.71	2257.51	-0.776622	0.113079	-6.86793	6.51403e-12	2.88542e-10	Normal	M_WCS417_30m-M_Control	RNA	AT3G52400	SYP122	syntaxin protein, involved in the negative regulation of defense pathways such as programmed cell death, salicylic acid signalling pathway, jasmonic acid signalling pathway
BnaA03G0284000ZS	M_WCS417_30m	M_Control	2408.98	1396.72	1902.85	0.786516	0.114531	6.86729	6.5433e-12	2.89585e-10	Normal	M_WCS417_30m-M_Control	RNA	AT3G01290	HIR2	SPFH/Band 7/PHB domain-containing membrane-associated protein family
BnaA07G0157700ZS	M_WCS417_30m	M_Control	38.5109	167.775	103.143	-2.12118	0.309147	-6.86138	6.81995e-12	3.01566e-10	Down	M_WCS417_30m-M_Control	RNA	AT5G23820	ML3	MD-2-related lipid recognition domain-containing protein
BnaC01G0039600ZS	M_WCS417_30m	M_Control	170.796	41.9178	106.357	2.02674	0.295414	6.86069	6.85287e-12	3.02757e-10	Up	M_WCS417_30m-M_Control	RNA	AT4G34810	SAUR5	SAUR-like auxin-responsive protein family
BnaC01G0271000ZS	M_WCS417_30m	M_Control	17.7943	115.934	66.8641	-2.70344	0.39465	-6.85021	7.37409e-12	3.255e-10	Down	M_WCS417_30m-M_Control	RNA	AT3G50060	MYB77	Encodes a member of the R2R3 transcription factor gene family. Expressed in response to potassium deprivation and auxin. Involved in lateral root development. Interacts with ARF7 and regulates the expression of some auxin responsive genes.
BnaC02G0243600ZS	M_WCS417_30m	M_Control	243.769	542.603	393.186	-1.15467	0.168642	-6.84684	7.55006e-12	3.32978e-10	Down	M_WCS417_30m-M_Control	RNA	AT1G69840	AtHIR1	SPFH/Band 7/PHB domain-containing membrane-associated protein family
BnaC03G0804000ZS	M_WCS417_30m	M_Control	577.772	261.492	419.632	1.14504	0.1673	6.84424	7.68844e-12	3.38786e-10	Up	M_WCS417_30m-M_Control	RNA	AT1G54050	HSP17.4B	HSP20-like chaperones superfamily protein
BnaA02G0024800ZS	M_WCS417_30m	M_Control	229.825	525.523	377.674	-1.19418	0.174574	-6.84051	7.89106e-12	3.47412e-10	Down	M_WCS417_30m-M_Control	RNA	AT5G07100	WRKY26	Encodes WRKY DNA-binding protein 26 (WRKY26).
BnaA09G0102200ZS	M_WCS417_30m	M_Control	328.342	119.739	224.041	1.45704	0.213105	6.83718	8.0765e-12	3.55268e-10	Up	M_WCS417_30m-M_Control	RNA	AT5G66050	--	Wound-responsive family protein
BnaC04G0093300ZS	M_WCS417_30m	M_Control	210.498	60.5895	135.544	1.79817	0.263003	6.83706	8.08363e-12	3.55273e-10	Up	M_WCS417_30m-M_Control	RNA	AT2G37280	PDR5	Encodes an ATP-binding cassette (ABC) transporter. Expressed in the vascular tissue of primary stem.
BnaA03G0160800ZS	M_WCS417_30m	M_Control	58.0436	208.763	133.403	-1.84826	0.270402	-6.83524	8.1869e-12	3.595e-10	Down	M_WCS417_30m-M_Control	RNA	AT2G33360	--	Protein of unknown function (DUF3527)
BnaA02G0158400ZS	M_WCS417_30m	M_Control	400.957	154.494	277.725	1.37352	0.201219	6.82599	8.73213e-12	3.8311e-10	Up	M_WCS417_30m-M_Control	RNA	AT1G65840	PAO4	encodes a peroxisomal polyamine oxidase, involved in the back-conversion polyamine degradation pathway. Among the five polyamine oxidases in the Arabidopsis genome, PAO4 is the major isoform in root peroxisomes.
BnaA01G0423500ZS	M_WCS417_30m	M_Control	3238.71	1928.62	2583.66	0.747751	0.109602	6.82242	8.95198e-12	3.92416e-10	Normal	M_WCS417_30m-M_Control	RNA	AT3G08710	TRXh9	Associated to plasma membrane. Moves cell to cell, suggesting a role in intercellular communication.
BnaC06G0008800ZS	M_WCS417_30m	M_Control	445.214	188.557	316.886	1.24052	0.181844	6.82191	8.98394e-12	3.93476e-10	Up	M_WCS417_30m-M_Control	RNA	AT1G43910	--	P-loop containing nucleoside triphosphate hydrolases superfamily protein
BnaA04G0146800ZS	M_WCS417_30m	M_Control	1155.91	1998.34	1577.13	-0.789912	0.115808	-6.82089	9.04759e-12	3.95922e-10	Normal	M_WCS417_30m-M_Control	RNA	AT2G22500	UCP5	Encodes one of the mitochondrial dicarboxylate carriers (DIC): DIC1 (AT2G22500), DIC2 (AT4G24570), DIC3 (AT5G09470).
BnaC07G0532100ZS	M_WCS417_30m	M_Control	1136.41	1960.86	1548.64	-0.787028	0.115442	-6.81753	9.26191e-12	4.04951e-10	Normal	M_WCS417_30m-M_Control	RNA	AT4G36500	--	--
BnaA08G0100000ZS	M_WCS417_30m	M_Control	1327.11	2268.89	1798	-0.773714	0.113555	-6.81354	9.52266e-12	4.15992e-10	Normal	M_WCS417_30m-M_Control	RNA	AT4G16500	CYS4	Cystatin/monellin superfamily protein
BnaA04G0166900ZS	M_WCS417_30m	M_Control	358.903	138.967	248.935	1.3674	0.200724	6.81235	9.60146e-12	4.19074e-10	Up	M_WCS417_30m-M_Control	RNA	AT2G25090	SnRK3.18	Encodes a member of the SNF1-related kinase (SnRK) gene family (SnRK3.18), which has also been reported as a member of the CBL-interacting protein kinases (CIPK16) and is involved in salinity tolerance.
BnaA07G0156100ZS	M_WCS417_30m	M_Control	159.132	37.0835	98.1078	2.10217	0.308768	6.80825	9.87945e-12	4.30836e-10	Up	M_WCS417_30m-M_Control	RNA	AT2G27690	CYP94C1	Encodes a CYP94C1. Has highest omega-hydroxylase activity with 9,10-epoxystearic acid, while also metabolized lauric acid (C12:0) and C18 unsaturated fatty acids. Gene expression is induced in response to wounding and jasmonic acid treatment.
BnaA02G0191800ZS	M_WCS417_30m	M_Control	252.042	554.175	403.108	-1.13723	0.167043	-6.808	9.89676e-12	4.3122e-10	Down	M_WCS417_30m-M_Control	RNA	AT1G70840	MLP31	MLP-like protein 31
BnaA02G0000800ZS	M_WCS417_30m	M_Control	553.785	247.707	400.746	1.16191	0.170706	6.80649	1.00007e-11	4.35372e-10	Up	M_WCS417_30m-M_Control	RNA	AT5G20900	TIFY3B	jasmonate-zim-domain protein 12
BnaA07G0001300ZS	M_WCS417_30m	M_Control	1460.69	801.815	1131.25	0.864675	0.127044	6.80608	1.00293e-11	4.36243e-10	Normal	M_WCS417_30m-M_Control	RNA	AT2G20610	SUR1	Confers auxin overproduction. Mutants have an over-proliferation of lateral roots. Encodes a C-S lyase involved in converting S-alkylthiohydroximate to thiohydroximate in glucosinolate biosynthesis.
BnaA04G0252800ZS	M_WCS417_30m	M_Control	58.0119	205.732	131.872	-1.8272	0.268488	-6.80553	1.0068e-11	4.37554e-10	Down	M_WCS417_30m-M_Control	RNA	AT2G39980	--	HXXXD-type acyl-transferase family protein
BnaA03G0134100ZS	M_WCS417_30m	M_Control	83.8262	5.70762	44.7669	3.85116	0.566133	6.80257	1.02767e-11	4.4624e-10	Up	M_WCS417_30m-M_Control	RNA	AT5G52670	--	Copper transport protein family
BnaC04G0432500ZS	M_WCS417_30m	M_Control	705.293	330.216	517.755	1.09656	0.161237	6.8009	1.03967e-11	4.51063e-10	Up	M_WCS417_30m-M_Control	RNA	AT2G21940	SK1	Encodes a shikimate kinase. Its transcripts appear to be expressed most highly in mature embryos and senescing leaves, and its transcript levels rise during heat stress and recovery. It is believed to be localized to the chloroplast.
BnaA03G0061100ZS	M_WCS417_30m	M_Control	251.358	79.2042	165.281	1.66427	0.244808	6.79826	1.05888e-11	4.59006e-10	Up	M_WCS417_30m-M_Control	RNA	AT5G15070	VIP2	Phosphoglycerate mutase-like family protein
BnaC09G0579300ZS	M_WCS417_30m	M_Control	153.74	32.4521	93.0961	2.23961	0.329637	6.79418	1.08927e-11	4.71773e-10	Up	M_WCS417_30m-M_Control	RNA	AT5G06860	PGIP1	Encodes a polygalacturonase inhibiting protein involved in defense response. PGIPs inhibit the function of cell wall pectin degrading enzymes such as those produced by fungal pathogens. PGIP1 is induced by fungal infection. Suppressed in the proton sensitive stop1-mutant, but the transcription level was recovered by transformation of STOP2. Knockout mutant showed severe damage in the root tip in …
BnaA05G0070200ZS	M_WCS417_30m	M_Control	344.436	132.443	238.44	1.38034	0.20321	6.79268	1.1007e-11	4.76317e-10	Up	M_WCS417_30m-M_Control	RNA	AT2G38640	--	Protein of unknown function (DUF567)
BnaA07G0362300ZS	M_WCS417_30m	M_Control	686.656	1253.98	970.318	-0.868978	0.127936	-6.79228	1.10379e-11	4.77247e-10	Normal	M_WCS417_30m-M_Control	RNA	AT1G76550	--	Phosphofructokinase family protein
BnaA03G0366500ZS	M_WCS417_30m	M_Control	781.839	387.449	584.644	1.01348	0.149218	6.79195	1.10629e-11	4.7792e-10	Up	M_WCS417_30m-M_Control	RNA	AT3G21230	4CL5	The gene encodes a 4-coumarate coenzyme A ligase being able to use sinapate as substrate. The catalytic efficiency was in the following (descending) order: p-coumaric acid, caffeic acid, 5-OH-ferulic acid, ferulic acid and sinapic acid. At4CL5 was unable to use cinnamic acid as substrate. Knockout of At4CL5 (4cl5) revealed no effect on syringyl lignin content indicating that the activity observed…
BnaA03G0517200ZS	M_WCS417_30m	M_Control	413.001	172.298	292.649	1.26078	0.185635	6.79174	1.10788e-11	4.78202e-10	Up	M_WCS417_30m-M_Control	RNA	AT5G48070	XTH20	putative xyloglucan endotransglycosylase/hydrolase, expressed primarily in the stele of mature non-elongating regions of both the main and the lateral root. Is expressed in lateral root primordia but expression ceases after lateral root begins to grow.
BnaC07G0366800ZS	M_WCS417_30m	M_Control	99.8728	11.2644	55.5686	3.15221	0.464153	6.79131	1.1112e-11	4.79227e-10	Up	M_WCS417_30m-M_Control	RNA	AT5G24270	SOS3	encodes a calcium sensor that is essential for K+ nutrition, K+/Na+ selectivity, and salt tolerance. The protein is similar to calcineurin B. Lines carrying recessive mutations are hypersensitive to Na+ and Li+ stresses and is unable to grow in low K+. The growth defect is rescued by extracellular calcium.
BnaC03G0207800ZS	M_WCS417_30m	M_Control	2011.02	1168.67	1589.84	0.783249	0.115358	6.78971	1.12356e-11	4.84144e-10	Normal	M_WCS417_30m-M_Control	RNA	AT2G37110	--	PLAC8 family protein
BnaA02G0299800ZS	M_WCS417_30m	M_Control	496.121	219.461	357.791	1.17631	0.17327	6.78888	1.13009e-11	4.86544e-10	Up	M_WCS417_30m-M_Control	RNA	AT2G34690	ACD11	Gene product transports the glycolipid precursor sphingosine between membranes in vitro. Mutant constitutively expresses defense-related genes that accompany the hypersensitive response normally triggered by avirulent pathogens.
BnaC05G0053100ZS	M_WCS417_30m	M_Control	588.642	263.63	426.136	1.157	0.170452	6.78786	1.1381e-11	4.89578e-10	Up	M_WCS417_30m-M_Control	RNA	AT1G07350	SR45a	Encodes a serine/arginine rich-like protein, SR45a. Involved in the regulation of stress-responsive alternative splicing.
BnaC07G0491100ZS	M_WCS417_30m	M_Control	85.327	258.442	171.884	-1.59931	0.235774	-6.78322	1.17525e-11	5.05127e-10	Down	M_WCS417_30m-M_Control	RNA	AT2G25150	--	HXXXD-type acyl-transferase family protein
BnaA09G0147800ZS	M_WCS417_30m	M_Control	978.01	1719.9	1348.96	-0.814555	0.120087	-6.78303	1.17678e-11	5.05358e-10	Normal	M_WCS417_30m-M_Control	RNA	AT1G63840	--	RING/U-box superfamily protein
BnaC09G0581300ZS	M_WCS417_30m	M_Control	596.447	279.582	438.015	1.09234	0.161138	6.77892	1.21077e-11	5.19514e-10	Up	M_WCS417_30m-M_Control	RNA	AT5G06720	PRX53	Encodes a peroxidase with diverse roles in the wound response, flower development, and syncytium formation.
BnaA05G0107700ZS	M_WCS417_30m	M_Control	232.009	71.9058	151.958	1.69241	0.249879	6.7729	1.26227e-11	5.41151e-10	Up	M_WCS417_30m-M_Control	RNA	AT2G33480	NAC041	NAC domain containing protein 41
BnaA09G0498400ZS	M_WCS417_30m	M_Control	1166.26	2005.64	1585.95	-0.782038	0.115502	-6.77077	1.28101e-11	5.48723e-10	Normal	M_WCS417_30m-M_Control	RNA	AT5G59970	--	Histone superfamily protein
BnaA09G0101500ZS	M_WCS417_30m	M_Control	855.648	1578.71	1217.18	-0.884019	0.130608	-6.7685	1.30123e-11	5.56915e-10	Normal	M_WCS417_30m-M_Control	RNA	AT5G66210	CPK28	member of Calcium Dependent Protein Kinase
BnaA06G0368200ZS	M_WCS417_30m	M_Control	311.191	112.54	211.865	1.46964	0.217148	6.7679	1.30662e-11	5.58748e-10	Up	M_WCS417_30m-M_Control	RNA	AT3G28345	MDR13	Encodes an ATP-binding cassette (ABC) transporter. Expressed in the vascular tissue of primary stem.
BnaA10G0047900ZS	M_WCS417_30m	M_Control	2399.7	3933.89	3166.79	-0.713164	0.105402	-6.76611	1.32292e-11	5.65243e-10	Normal	M_WCS417_30m-M_Control	RNA	--	--	--
BnaA01G0318600ZS	M_WCS417_30m	M_Control	395.612	786.775	591.194	-0.991523	0.14657	-6.76486	1.33439e-11	5.69663e-10	Normal	M_WCS417_30m-M_Control	RNA	AT3G19680	--	Protein of unknown function (DUF1005)
BnaA02G0227700ZS	M_WCS417_30m	M_Control	182.429	47.5785	115.004	1.94309	0.287269	6.76401	1.34221e-11	5.72519e-10	Up	M_WCS417_30m-M_Control	RNA	AT1G77680	SOV	Ribonuclease II/R family protein
BnaC06G0140000ZS	M_WCS417_30m	M_Control	3284.53	1985.07	2634.8	0.726655	0.107462	6.76197	1.36131e-11	5.80177e-10	Normal	M_WCS417_30m-M_Control	RNA	AT1G55450	--	S-adenosyl-L-methionine-dependent methyltransferases superfamily protein
BnaA01G0100500ZS	M_WCS417_30m	M_Control	546.186	245.483	395.834	1.15306	0.170622	6.758	1.3991e-11	5.9578e-10	Up	M_WCS417_30m-M_Control	RNA	AT4G19120	ERD3	S-adenosyl-L-methionine-dependent methyltransferases superfamily protein
BnaC01G0432300ZS	M_WCS417_30m	M_Control	660.826	317.591	489.209	1.05635	0.156474	6.75093	1.46905e-11	6.25044e-10	Up	M_WCS417_30m-M_Control	RNA	AT3G16530	--	Lectin like protein whose expression is induced upon treatment with chitin oligomers.
BnaA05G0087900ZS	M_WCS417_30m	M_Control	1412.95	2487.07	1950.01	-0.815374	0.120849	-6.74706	1.50874e-11	6.41391e-10	Normal	M_WCS417_30m-M_Control	RNA	AT3G52590	UBQ1	Ubiquitin extension protein
BnaC03G0347800ZS	M_WCS417_30m	M_Control	337.831	123.7	230.766	1.4514	0.215178	6.74512	1.52902e-11	6.49467e-10	Up	M_WCS417_30m-M_Control	RNA	AT3G02800	PFA-DSP3	Encodes an atypical dual-speci&#64257;city phosphatase.
BnaA02G0304700ZS	M_WCS417_30m	M_Control	83.8262	254.481	169.153	-1.60285	0.237689	-6.74348	1.54642e-11	6.56308e-10	Down	M_WCS417_30m-M_Control	RNA	AT5G47070	PBL19	Protein kinase superfamily protein
BnaA02G0262100ZS	M_WCS417_30m	M_Control	966.656	506.809	736.733	0.930989	0.138164	6.73827	1.60288e-11	6.79702e-10	Normal	M_WCS417_30m-M_Control	RNA	AT4G12400	Hop3	Encodes one of the 36 carboxylate clamp (CC)-tetratricopeptide repeat (TPR) proteins (Prasad 2010, Pubmed ID: 20856808) with potential to interact with Hsp90/Hsp70 as co-chaperones.
BnaC02G0387900ZS	M_WCS417_30m	M_Control	26.9574	136.342	81.6499	-2.34033	0.347353	-6.73762	1.60997e-11	6.82136e-10	Down	M_WCS417_30m-M_Control	RNA	--	--	--
BnaC05G0090800ZS	M_WCS417_30m	M_Control	726.073	361.115	543.594	1.00817	0.149728	6.73334	1.65817e-11	7.01897e-10	Up	M_WCS417_30m-M_Control	RNA	AT1G11310	PMR2	A member of a large family of seven-transmembrane domain proteins specific to plants, homologs of the barley mildew resistance locus o (MLO) protein. The Arabidopsis genome contains 15 genes encoding MLO proteins, with localization in plasma membrane. Phylogenetic analysis revealed four clades of closely-related AtMLO genes. ATMLO2 belongs to the clade IV, with AtMLO3, AtMLO6 and AtMLO12. The gen…
BnaC04G0391400ZS	M_WCS417_30m	M_Control	80.2293	245.384	162.806	-1.61271	0.239516	-6.73323	1.65938e-11	7.01897e-10	Down	M_WCS417_30m-M_Control	RNA	AT5G39590	OXR5	TLD-domain containing nucleolar protein
BnaC09G0151900ZS	M_WCS417_30m	M_Control	225.807	508.882	367.345	-1.17238	0.17421	-6.72966	1.70057e-11	7.18721e-10	Down	M_WCS417_30m-M_Control	RNA	AT1G64640	ENODL8	early nodulin-like protein 8
BnaC02G0135100ZS	M_WCS417_30m	M_Control	803.595	1429.02	1116.31	-0.830348	0.123499	-6.72353	1.7737e-11	7.49003e-10	Normal	M_WCS417_30m-M_Control	RNA	AT5G58430	EXO70B1	A member of EXO70 gene family, putative exocyst subunits, conserved in land plants. Arabidopsis thaliana contains 23 putative EXO70 genes, which can be classified into eight clusters on the phylogenetic tree.
BnaC08G0006000ZS	M_WCS417_30m	M_Control	273.759	95.7185	184.739	1.51733	0.225833	6.71883	1.83195e-11	7.72958e-10	Up	M_WCS417_30m-M_Control	RNA	AT1G03590	--	Protein phosphatase 2C family protein
BnaA04G0051400ZS	M_WCS417_30m	M_Control	2702.91	1624.46	2163.68	0.734638	0.109403	6.71495	1.88127e-11	7.93108e-10	Normal	M_WCS417_30m-M_Control	RNA	AT3G54020	AtIPCS1	Inositol phosphorylceramide synthase
BnaA01G0205300ZS	M_WCS417_30m	M_Control	215.738	498.066	356.902	-1.208	0.179929	-6.71378	1.89647e-11	7.98849e-10	Down	M_WCS417_30m-M_Control	RNA	AT4G14500	--	Polyketide cyclase/dehydrase and lipid transport superfamily protein
BnaC04G0329100ZS	M_WCS417_30m	M_Control	965.513	507.682	736.598	0.926763	0.138046	6.71346	1.90069e-11	7.99962e-10	Normal	M_WCS417_30m-M_Control	RNA	AT3G54020	AtIPCS1	Inositol phosphorylceramide synthase
BnaA03G0322500ZS	M_WCS417_30m	M_Control	307.879	114.952	211.415	1.42117	0.211713	6.71271	1.91038e-11	8.03375e-10	Up	M_WCS417_30m-M_Control	RNA	AT3G11170	FADD	Chloroplastic enzyme responsible for the synthesis of 16:3 and 18:3 fatty acids from galactolipids, sulpholipids and phosphatidylglycerol. Uses ferredoxin as electron donor. Gene expression is induced by wounding in shoot and root. The wound-response in shoot is independent of jasmonic acid mediated pathway whereas the root response is mediated by jasmonic acid.
BnaA04G0112900ZS	M_WCS417_30m	M_Control	230.309	72.7272	151.518	1.66383	0.247976	6.70965	1.95089e-11	8.1973e-10	Up	M_WCS417_30m-M_Control	RNA	AT4G12170	--	Thioredoxin superfamily protein
BnaC03G0540700ZS	M_WCS417_30m	M_Control	675.064	1225.91	950.487	-0.860577	0.128288	-6.70818	1.97071e-11	8.2737e-10	Normal	M_WCS417_30m-M_Control	RNA	AT5G63590	FLS3	flavonol synthase 3
BnaA04G0142300ZS	M_WCS417_30m	M_Control	596.605	281.485	439.045	1.08283	0.161439	6.70736	1.98173e-11	8.31311e-10	Up	M_WCS417_30m-M_Control	RNA	AT2G21940	SK1	Encodes a shikimate kinase. Its transcripts appear to be expressed most highly in mature embryos and senescing leaves, and its transcript levels rise during heat stress and recovery. It is believed to be localized to the chloroplast.
BnaC01G0366900ZS	M_WCS417_30m	M_Control	1134.52	618.834	876.679	0.874262	0.130354	6.70685	1.9887e-11	8.33545e-10	Normal	M_WCS417_30m-M_Control	RNA	AT3G22910	ACA13	ATPase E1-E2 type family protein / haloacid dehalogenase-like hydrolase family protein
BnaA10G0053300ZS	M_WCS417_30m	M_Control	849.961	417.313	633.637	1.02562	0.152987	6.704	2.02796e-11	8.49296e-10	Up	M_WCS417_30m-M_Control	RNA	AT1G07350	SR45a	Encodes a serine/arginine rich-like protein, SR45a. Involved in the regulation of stress-responsive alternative splicing.
BnaA04G0144200ZS	M_WCS417_30m	M_Control	75.7586	242.286	159.022	-1.67891	0.250502	-6.70219	2.05321e-11	8.59163e-10	Down	M_WCS417_30m-M_Control	RNA	AT2G22240	MIPS2	** Referred to as MIPS1 in Mitsuhashi et al 2008. Myo-inositol-1-phosphate synthase isoform 2. Expressed in leaf, root and silique. Immunolocalization experiments with an antibody recognizing MIPS1, MIPS2, and MIPS3 showed endosperm localization.
BnaC04G0598300ZS	M_WCS417_30m	M_Control	336.59	692.091	514.341	-1.03991	0.155208	-6.70012	2.08243e-11	8.70667e-10	Down	M_WCS417_30m-M_Control	RNA	AT2G44080	ARL	Encodes ARL, a gene similar to ARGOS involved in cell expansion-dependent organ growth. Upregulated by brassinosteroid. Acts downstream of BRI1.
BnaA09G0642500ZS	M_WCS417_30m	M_Control	1369.91	766.493	1068.2	0.837439	0.124994	6.69985	2.0863e-11	8.71566e-10	Normal	M_WCS417_30m-M_Control	RNA	AT1G13210	ALA11	autoinhibited Ca2+/ATPase II
BnaA09G0236600ZS	M_WCS417_30m	M_Control	1092.69	588.554	840.62	0.893006	0.133298	6.69932	2.09392e-11	8.74029e-10	Normal	M_WCS417_30m-M_Control	RNA	AT4G04610	PRH19	Encodes a protein disulfide isomerase-like (PDIL) protein, a member of a multigene family within the thioredoxin (TRX) superfamily. This protein also belongs to the adenosine 5'-phosphosulfate reductase-like (APRL) group.
BnaA02G0057700ZS	M_WCS417_30m	M_Control	126.871	23.5579	75.2145	2.43477	0.363462	6.69885	2.10066e-11	8.76124e-10	Up	M_WCS417_30m-M_Control	RNA	--	--	--
BnaC03G0015600ZS	M_WCS417_30m	M_Control	2285.49	1345.98	1815.73	0.763604	0.114011	6.69762	2.11848e-11	8.82829e-10	Normal	M_WCS417_30m-M_Control	RNA	AT5G03630	MDAR2	Pyridine nucleotide-disulphide oxidoreductase family protein
BnaA08G0290700ZS	M_WCS417_30m	M_Control	580.875	274.031	427.453	1.08343	0.161793	6.69639	2.13638e-11	8.89557e-10	Up	M_WCS417_30m-M_Control	RNA	AT1G10090	--	Early-responsive to dehydration stress protein (ERD4)
BnaC08G0342100ZS	M_WCS417_30m	M_Control	2517.79	1487.3	2002.55	0.75913	0.113476	6.68981	2.23466e-11	9.29716e-10	Normal	M_WCS417_30m-M_Control	RNA	AT3G54150	EFD	S-adenosyl-L-methionine-dependent methyltransferases superfamily protein
BnaC06G0014200ZS	M_WCS417_30m	M_Control	1102.85	596.045	849.447	0.887314	0.132679	6.6877	2.26701e-11	9.424e-10	Normal	M_WCS417_30m-M_Control	RNA	AT1G45145	TRX5	encodes a cytosolic thioredoxin that reduces disulfide bridges of target proteins by the reversible formation of a disulfide bridge between two neighboring Cys residues present in the active site. Thioredoxins have been found to regulate a variety of biological reactions in prokaryotic and eukaryotic cells.
BnaA09G0052700ZS	M_WCS417_30m	M_Control	609.046	278.199	443.623	1.13013	0.169029	6.68604	2.29296e-11	9.52406e-10	Up	M_WCS417_30m-M_Control	RNA	AT3G04320	--	Kunitz family trypsin and protease inhibitor protein
BnaA06G0021900ZS	M_WCS417_30m	M_Control	321.402	122.307	221.854	1.39406	0.208682	6.6803	2.3845e-11	9.89615e-10	Up	M_WCS417_30m-M_Control	RNA	AT1G51760	JR3	encodes a member of the six Arabidopsis IAA-amino acid conjugate hydrolase subfamily and conjugates and conjugates IAA-Ala in vitro. Gene is expressed most strongly in roots, stems, and flowers.
BnaC09G0022900ZS	M_WCS417_30m	M_Control	11.6486	96.436	54.0423	-3.04665	0.456232	-6.67785	2.42476e-11	1.0055e-09	Down	M_WCS417_30m-M_Control	RNA	AT3G26960	--	Pollen Ole e 1 allergen and extensin family protein
BnaC05G0460200ZS	M_WCS417_30m	M_Control	851.142	1530.22	1190.68	-0.845835	0.12673	-6.67433	2.48361e-11	1.02906e-09	Normal	M_WCS417_30m-M_Control	RNA	AT3G14210	ESM1	A semidominant QTL which has an epistatic effect on the Epithiospecifier gene. Represses nitrile formation and favors isothiocyanate production during glucosinolate hydrolysis. The functional allele deters the insect herbivory T. ni.
BnaA07G0270400ZS	M_WCS417_30m	M_Control	48.7379	181.145	114.941	-1.89371	0.283756	-6.67371	2.49418e-11	1.0326e-09	Down	M_WCS417_30m-M_Control	RNA	AT1G28760	PNET2_A	Uncharacterized conserved protein (DUF2215)
BnaA03G0230900ZS	M_WCS417_30m	M_Control	1275.49	2166.68	1721.09	-0.764337	0.114624	-6.66823	2.58909e-11	1.07102e-09	Normal	M_WCS417_30m-M_Control	RNA	AT2G28720	HTB3	Histone superfamily protein
BnaC04G0056100ZS	M_WCS417_30m	M_Control	24.9405	130.078	77.5093	-2.38332	0.357752	-6.66192	2.70266e-11	1.11671e-09	Down	M_WCS417_30m-M_Control	RNA	AT2G45080	cycp3;1	cyclin p3;1
BnaC01G0396900ZS	M_WCS417_30m	M_Control	67.6436	226.472	147.058	-1.74254	0.261571	-6.66185	2.70395e-11	1.11671e-09	Down	M_WCS417_30m-M_Control	RNA	AT3G19380	PUB25	plant U-box 25
BnaC07G0221800ZS	M_WCS417_30m	M_Control	790.721	394.222	592.472	1.00327	0.150942	6.64674	2.99653e-11	1.23653e-09	Up	M_WCS417_30m-M_Control	RNA	AT5G43760	KCS20	Encodes KCS20, a member of the 3-ketoacyl-CoA synthase family involved in the biosynthesis of VLCFA (very long chain fatty acids).
BnaC05G0437400ZS	M_WCS417_30m	M_Control	1821.09	3022.41	2421.75	-0.73093	0.109991	-6.64536	3.02481e-11	1.24719e-09	Normal	M_WCS417_30m-M_Control	RNA	AT3G16400	NSP1	Encodes a nitrile-specifier protein NSP1 responsible for constitutive and herbivore-induced simple nitrile formation in rosette leaves. NSP1 is one out of five (At3g16400/NSP1, At2g33070/NSP2, At3g16390/NSP3, At3g16410/NSP4 and At5g48180/NSP5) A. thaliana epithiospecifier protein (ESP) homologues that promote simple nitrile, but not epithionitrile or thiocyanate formation.
BnaC09G0515300ZS	M_WCS417_30m	M_Control	565.718	1049.12	807.419	-0.890957	0.134121	-6.64292	3.07529e-11	1.26697e-09	Normal	M_WCS417_30m-M_Control	RNA	AT5G14700	--	NAD(P)-binding Rossmann-fold superfamily protein
BnaC07G0192900ZS	M_WCS417_30m	M_Control	340.95	134.185	237.568	1.34425	0.202393	6.64178	3.0992e-11	1.27578e-09	Up	M_WCS417_30m-M_Control	RNA	AT1G20780	SAUL1	Encodes a protein containing a U-box and an ARM domain. Homozygous mutant seedlings have a seedling lethal phenotype with widespread cell death lesions throughout the cotyledons and roots.
BnaC09G0554000ZS	M_WCS417_30m	M_Control	564.407	262.761	413.584	1.1018	0.165926	6.64031	3.13026e-11	1.28752e-09	Up	M_WCS417_30m-M_Control	RNA	AT5G10410	PICALM10b	ENTH/ANTH/VHS superfamily protein
BnaC03G0546100ZS	M_WCS417_30m	M_Control	388.402	148.319	268.361	1.38546	0.208741	6.63722	3.19656e-11	1.31373e-09	Up	M_WCS417_30m-M_Control	RNA	AT5G63140	PAP29	purple acid phosphatase 29
BnaA02G0407200ZS	M_WCS417_30m	M_Control	228.992	71.1784	150.085	1.68245	0.25362	6.63377	3.27225e-11	1.34374e-09	Up	M_WCS417_30m-M_Control	RNA	AT5G64120	PRX71	Encodes a cell wall bound peroxidase that is induced by hypo-osmolarity and is involved in the lignification of cell walls.
BnaA09G0126600ZS	M_WCS417_30m	M_Control	315.645	117.109	216.377	1.42942	0.215522	6.63236	3.30359e-11	1.35552e-09	Up	M_WCS417_30m-M_Control	RNA	AT2G20900	DGK5	diacylglycerol kinase 5
BnaA05G0083500ZS	M_WCS417_30m	M_Control	5632.47	3545.73	4589.1	0.667713	0.100733	6.62853	3.39049e-11	1.39005e-09	Normal	M_WCS417_30m-M_Control	RNA	AT2G36880	MAT3	methionine adenosyltransferase 3
BnaA08G0155600ZS	M_WCS417_30m	M_Control	191.054	46.3464	118.7	2.05065	0.309384	6.62815	3.39919e-11	1.39249e-09	Up	M_WCS417_30m-M_Control	RNA	AT4G30270	XTH24	encodes a protein similar to endo xyloglucan transferase in sequence. It is also very similar to BRU1 in soybean, which is involved in brassinosteroid response.
BnaC07G0325300ZS	M_WCS417_30m	M_Control	1023.96	552.589	788.275	0.889625	0.134242	6.62704	3.42486e-11	1.40187e-09	Normal	M_WCS417_30m-M_Control	RNA	AT5G47880	ERF1-1	Encodes a eukaryotic release factor 1 homolog. Cosuppression of the gene's expression results affects cell elongation of the inflorescence stem, specifically the internodes, and radial cell division. Expression of the protein is primarily observed in the vascular system and in actively growing and elongating zones.
BnaC04G0124600ZS	M_WCS417_30m	M_Control	293.84	106.255	200.048	1.46521	0.221159	6.62514	3.46908e-11	1.41882e-09	Up	M_WCS417_30m-M_Control	RNA	AT2G34500	CYP710A1	Encodes a protein with C22-sterol desaturase activity. The enzyme was shown to catalyze in the presence of NADPH the conversion of &beta;-sitosterol to stigmasterol, but not that of 24-<i>epi</i>-campesterol to brassicasterol (unlike CYP710A2).
BnaA10G0279000ZS	M_WCS417_30m	M_Control	403.654	170.14	286.897	1.24649	0.1882	6.62322	3.51462e-11	1.43629e-09	Up	M_WCS417_30m-M_Control	RNA	AT5G04930	ALA1	Encodes a putative aminophospholipid translocase (p-type ATPase) involved in chilling response. It is targeted to the plasma membrane following association in the endoplasmic reticulum with an ALIS protein beta-subunit.
BnaA09G0468500ZS	M_WCS417_30m	M_Control	201.629	457.692	329.66	-1.18291	0.178657	-6.62112	3.56498e-11	1.4557e-09	Down	M_WCS417_30m-M_Control	RNA	AT3G50060	MYB77	Encodes a member of the R2R3 transcription factor gene family. Expressed in response to potassium deprivation and auxin. Involved in lateral root development. Interacts with ARF7 and regulates the expression of some auxin responsive genes.
BnaA01G0156400ZS	M_WCS417_30m	M_Control	131.342	346.493	238.917	-1.39919	0.211468	-6.61657	3.67635e-11	1.49996e-09	Down	M_WCS417_30m-M_Control	RNA	AT4G26130	--	--
BnaC01G0134600ZS	M_WCS417_30m	M_Control	2437.47	1448.59	1943.03	0.750575	0.113554	6.60983	3.84774e-11	1.56863e-09	Normal	M_WCS417_30m-M_Control	RNA	AT4G20830	OGOX1	FAD-binding Berberine family protein
BnaC09G0315000ZS	M_WCS417_30m	M_Control	255.512	580.79	418.151	-1.18571	0.179441	-6.60777	3.90151e-11	1.58927e-09	Down	M_WCS417_30m-M_Control	RNA	AT4G08300	UMAMIT17	nodulin MtN21-like transporter family protein
BnaA07G0120400ZS	M_WCS417_30m	M_Control	76.1797	4.47556	40.3276	4.11176	0.622307	6.60729	3.91417e-11	1.59315e-09	Up	M_WCS417_30m-M_Control	RNA	AT1G22810	ERF019	encodes a member of the DREB subfamily A-5 of ERF/AP2 transcription factor family. The protein contains one AP2 domain. There are 16 members in this subfamily including RAP2.1, RAP2.9 and RAP2.10.
BnaA03G0514100ZS	M_WCS417_30m	M_Control	214.206	10.0323	112.119	4.43176	0.670995	6.60475	3.98188e-11	1.6194e-09	Up	M_WCS417_30m-M_Control	RNA	AT4G29930	--	basic helix-loop-helix (bHLH) DNA-binding superfamily protein
BnaC06G0378400ZS	M_WCS417_30m	M_Control	991.081	532.482	761.781	0.896164	0.135725	6.60277	4.03533e-11	1.63983e-09	Normal	M_WCS417_30m-M_Control	RNA	AT1G71110	--	--
BnaA05G0170700ZS	M_WCS417_30m	M_Control	1101.59	601.051	851.319	0.874425	0.132547	6.59709	4.19297e-11	1.70252e-09	Normal	M_WCS417_30m-M_Control	RNA	AT1G51760	JR3	encodes a member of the six Arabidopsis IAA-amino acid conjugate hydrolase subfamily and conjugates and conjugates IAA-Ala in vitro. Gene is expressed most strongly in roots, stems, and flowers.
BnaA10G0271900ZS	M_WCS417_30m	M_Control	3916.29	2426.27	3171.28	0.690649	0.104709	6.59588	4.22729e-11	1.71508e-09	Normal	M_WCS417_30m-M_Control	RNA	AT3G26180	CYP71B20	putative cytochrome P450
BnaC09G0453300ZS	M_WCS417_30m	M_Control	4006.37	6325.38	5165.88	-0.658878	0.0999027	-6.5952	4.24691e-11	1.72029e-09	Normal	M_WCS417_30m-M_Control	RNA	AT3G43810	ZBF3	EF hand domain protein encodes a calmodulin. Can functionally complement a yeast CaM mutant.
BnaA03G0011200ZS	M_WCS417_30m	M_Control	1769.17	1034.67	1401.92	0.773938	0.117364	6.59432	4.27217e-11	1.72914e-09	Normal	M_WCS417_30m-M_Control	RNA	AT5G03630	MDAR2	Pyridine nucleotide-disulphide oxidoreductase family protein
BnaA03G0565800ZS	M_WCS417_30m	M_Control	555.675	253.249	404.462	1.13305	0.171825	6.59419	4.2757e-11	1.72919e-09	Up	M_WCS417_30m-M_Control	RNA	AT4G37790	HAT22	Encodes homeobox protein HAT22, member of the HD-Zip II family.
BnaA07G0176000ZS	M_WCS417_30m	M_Control	617.401	299.694	458.547	1.04213	0.158079	6.59248	4.32528e-11	1.74784e-09	Up	M_WCS417_30m-M_Control	RNA	AT5G41040	RWP1	Encodes a feruloyl-CoA transferase required for suberin synthesis. Has feruloyl-CoA-dependent feruloyl transferase activity towards substrates with a primary alcohol.
BnaA06G0404100ZS	M_WCS417_30m	M_Control	2133.71	3459.02	2796.36	-0.696964	0.105729	-6.59202	4.33884e-11	1.75193e-09	Normal	M_WCS417_30m-M_Control	RNA	AT2G02100	PDF2.2	Predicted to encode a PR (pathogenesis-related) protein. Belongs to the plant defensin (PDF) family with the following members: At1g75830/PDF1.1, At5g44420/PDF1.2a, At2g26020/PDF1.2b, At5g44430/PDF1.2c, At2g26010/PDF1.3, At1g19610/PDF1.4, At1g55010/PDF1.5, At2g02120/PDF2.1, At2g02100/PDF2.2, At2g02130/PDF2.3, At1g61070/PDF2.4, At5g63660/PDF2.5, At2g02140/PDF2.6, At5g38330/PDF3.1 and At4g30070/PDF…
BnaC05G0133200ZS	M_WCS417_30m	M_Control	469.655	209.901	339.778	1.16255	0.176522	6.5859	4.5213e-11	1.82414e-09	Up	M_WCS417_30m-M_Control	RNA	AT1G15950	IRX4	Encodes a cinnamoyl CoA reductase. Involved in lignin biosynthesis.
BnaA07G0164300ZS	M_WCS417_30m	M_Control	248.033	553.326	400.68	-1.15656	0.175647	-6.58456	4.56241e-11	1.83926e-09	Down	M_WCS417_30m-M_Control	RNA	AT2G28780	--	--
BnaC02G0107200ZS	M_WCS417_30m	M_Control	587.625	281.178	434.402	1.06289	0.161428	6.58429	4.57061e-11	1.8411e-09	Up	M_WCS417_30m-M_Control	RNA	AT5G21940	--	--
BnaA03G0193200ZS	M_WCS417_30m	M_Control	360.872	717.375	539.124	-0.991607	0.150674	-6.58116	4.66795e-11	1.87882e-09	Normal	M_WCS417_30m-M_Control	RNA	AT2G39650	--	Protein of unknown function (DUF506)
BnaC03G0087200ZS	M_WCS417_30m	M_Control	288.932	103.48	196.206	1.47963	0.224944	6.57778	4.7752e-11	1.92047e-09	Up	M_WCS417_30m-M_Control	RNA	AT5G18130	--	--
BnaC08G0473200ZS	M_WCS417_30m	M_Control	823.245	421.699	622.472	0.965123	0.146798	6.57449	4.88212e-11	1.96191e-09	Normal	M_WCS417_30m-M_Control	RNA	AT1G17380	TIFY11A	jasmonate-zim-domain protein 5
BnaC07G0266100ZS	M_WCS417_30m	M_Control	265.128	91.5967	178.362	1.53059	0.23282	6.57414	4.89346e-11	1.96491e-09	Up	M_WCS417_30m-M_Control	RNA	AT2G01340	At17.1	Encodes a protein whose expression is responsive to nematode infection.
BnaC03G0028700ZS	M_WCS417_30m	M_Control	2760.71	4478.43	3619.57	-0.697881	0.106208	-6.57089	5.00159e-11	2.00674e-09	Normal	M_WCS417_30m-M_Control	RNA	AT5G06320	NHL3	encodes a protein whose sequence is similar to tobacco hairpin-induced gene (HIN1) and Arabidopsis non-race specific disease resistance gene (NDR1). Expression of this gene is induced by cucumber mosaic virus, spermine and Pseudomonas syringae pv. tomato DC3000. The gene product is localized to the plasma membrane.
BnaC05G0184200ZS	M_WCS417_30m	M_Control	1518.87	866.328	1192.6	0.809826	0.123249	6.57064	5.0101e-11	2.00856e-09	Normal	M_WCS417_30m-M_Control	RNA	AT1G21380	TOL3	Target of Myb protein 1
BnaC03G0393700ZS	M_WCS417_30m	M_Control	530.406	238.278	384.342	1.15276	0.175453	6.57022	5.02402e-11	2.01255e-09	Up	M_WCS417_30m-M_Control	RNA	AT3G12500	PR3	encodes a basic chitinase involved in ethylene/jasmonic acid mediated signalling pathway during systemic acquired resistance based on expression analyses.
BnaA06G0158000ZS	M_WCS417_30m	M_Control	129.372	338.284	233.828	-1.38531	0.210939	-6.56737	5.12127e-11	2.04989e-09	Down	M_WCS417_30m-M_Control	RNA	AT3G49570	LSU3	response to low sulfur 3
BnaC09G0205200ZS	M_WCS417_30m	M_Control	138.615	30.0349	84.3248	2.20246	0.335383	6.56699	5.13421e-11	2.05344e-09	Up	M_WCS417_30m-M_Control	RNA	AT1G43710	SDC1	Encodes a serine decarboxylase that is involved in ethanolamine metabolism and is crucial for plant growth.
BnaC04G0577200ZS	M_WCS417_30m	M_Control	80.4352	247.296	163.866	-1.62074	0.247041	-6.56059	5.35936e-11	2.1418e-09	Down	M_WCS417_30m-M_Control	RNA	AT2G40750	WRKY54	member of WRKY Transcription Factor; Group III
BnaA07G0322500ZS	M_WCS417_30m	M_Control	59.8862	201.205	130.545	-1.74774	0.266432	-6.55982	5.3874e-11	2.15131e-09	Down	M_WCS417_30m-M_Control	RNA	AT1G71000	--	Chaperone DnaJ-domain superfamily protein
BnaA03G0177700ZS	M_WCS417_30m	M_Control	154.345	37.2394	95.792	2.05516	0.313314	6.55945	5.4008e-11	2.15496e-09	Up	M_WCS417_30m-M_Control	RNA	AT2G37170	PIP2B	a member of the plasma membrane intrinsic protein subfamily PIP2. localizes to the plasma membrane and exhibits water transport activity in Xenopus oocyte. expressed specifically in the vascular bundles and protein level increases slightly during leaf dev
BnaC03G0535000ZS	M_WCS417_30m	M_Control	104.344	290.285	197.314	-1.47715	0.225259	-6.55759	5.46856e-11	2.18028e-09	Down	M_WCS417_30m-M_Control	RNA	AT5G64060	NAC103	NAC domain containing protein 103
BnaC09G0512100ZS	M_WCS417_30m	M_Control	980.695	529.083	754.889	0.889986	0.135798	6.55375	5.61102e-11	2.23532e-09	Normal	M_WCS417_30m-M_Control	RNA	AT5G15130	WRKY72	member of WRKY Transcription Factor; Group II-b; contribute to basal immunity.
BnaC04G0569500ZS	M_WCS417_30m	M_Control	81.841	242.504	162.172	-1.56756	0.239221	-6.55279	5.64736e-11	2.24803e-09	Down	M_WCS417_30m-M_Control	RNA	AT2G39800	P5CS1	delta1-pyrroline-5-carboxylate synthase 1
BnaC05G0161100ZS	M_WCS417_30m	M_Control	31.4281	143.812	87.6198	-2.19153	0.334792	-6.54594	5.91226e-11	2.35163e-09	Down	M_WCS417_30m-M_Control	RNA	AT1G19210	ERF17	encodes a member of the DREB subfamily A-5 of ERF/AP2 transcription factor family. The protein contains one AP2 domain. There are 15 members in this subfamily including RAP2.1, RAP2.9 and RAP2.10.
BnaC06G0123300ZS	M_WCS417_30m	M_Control	740.856	371.699	556.277	0.99442	0.152053	6.53996	6.15351e-11	2.44567e-09	Normal	M_WCS417_30m-M_Control	RNA	AT1G52720	--	--
BnaA04G0281800ZS	M_WCS417_30m	M_Control	996.941	533.548	765.245	0.901118	0.137918	6.5337	6.41627e-11	2.5481e-09	Normal	M_WCS417_30m-M_Control	RNA	AT2G44450	BGLU15	beta glucosidase 15
BnaC09G0521700ZS	M_WCS417_30m	M_Control	812.606	1421.04	1116.82	-0.806358	0.123443	-6.53222	6.48034e-11	2.57153e-09	Normal	M_WCS417_30m-M_Control	RNA	AT5G14000	NAC084	NAC domain containing protein 84
BnaC07G0142600ZS	M_WCS417_30m	M_Control	249.946	532.321	391.134	-1.09094	0.167058	-6.53031	6.56324e-11	2.60239e-09	Down	M_WCS417_30m-M_Control	RNA	AT1G28670	ARAB-1	Arabidopsis thaliana lipase
BnaA10G0211300ZS	M_WCS417_30m	M_Control	745.845	376.907	561.376	0.985443	0.150968	6.52749	6.6881e-11	2.64983e-09	Normal	M_WCS417_30m-M_Control	RNA	AT5G15130	WRKY72	member of WRKY Transcription Factor; Group II-b; contribute to basal immunity.
BnaA03G0349300ZS	M_WCS417_30m	M_Control	2590.77	1573.42	2082.09	0.719342	0.110293	6.52211	6.93242e-11	2.74448e-09	Normal	M_WCS417_30m-M_Control	RNA	AT3G17390	SAMS3	S-adenosylmethionine synthetase
BnaC03G0746800ZS	M_WCS417_30m	M_Control	61.9031	204.911	133.407	-1.72581	0.264654	-6.52101	6.98343e-11	2.76251e-09	Down	M_WCS417_30m-M_Control	RNA	AT4G34410	RRTF1	encodes a member of the ERF (ethylene response factor) subfamily B-3 of ERF/AP2 transcription factor family. The protein contains one AP2 domain. There are 18 members in this subfamily including ATERF-1, ATERF-2, AND ATERF-5.
BnaC05G0042600ZS	M_WCS417_30m	M_Control	201.819	61.4109	131.615	1.71652	0.263452	6.51548	7.24569e-11	2.86403e-09	Up	M_WCS417_30m-M_Control	RNA	AT1G05880	ATARI12	Encodes ARI12 (ARIADNE 12). ARI12 belongs to a family of 鈥楻ING between RING fingers' (RBR) domain proteins with E3 ligase activity. Expression of ARI12 is induced by UV-B exposure.
BnaA05G0341700ZS	M_WCS417_30m	M_Control	159.085	380.697	269.891	-1.25952	0.193321	-6.51519	7.25959e-11	2.86728e-09	Down	M_WCS417_30m-M_Control	RNA	AT3G21690	--	MATE efflux family protein
BnaC09G0534400ZS	M_WCS417_30m	M_Control	554.206	252.494	403.35	1.1359	0.174425	6.51227	7.4023e-11	2.92137e-09	Up	M_WCS417_30m-M_Control	RNA	AT5G12340	--	--
BnaC02G0254200ZS	M_WCS417_30m	M_Control	532.296	990.637	761.466	-0.896472	0.137664	-6.51201	7.41499e-11	2.9241e-09	Normal	M_WCS417_30m-M_Control	RNA	AT1G70840	MLP31	MLP-like protein 31
BnaA09G0086700ZS	M_WCS417_30m	M_Control	189.949	431.311	310.63	-1.18317	0.181712	-6.51122	7.45426e-11	2.9373e-09	Down	M_WCS417_30m-M_Control	RNA	AT5G64040	PSAN	Encodes the only subunit of photosystem I located entirely in the thylakoid lumen. May be involved in the interaction between plastocyanin and the photosystem I complex. Phosphorylation of this protein is dependent on calcium.
BnaA09G0052800ZS	M_WCS417_30m	M_Control	1167.7	645.994	906.845	0.853944	0.131162	6.51061	7.48453e-11	2.94694e-09	Normal	M_WCS417_30m-M_Control	RNA	AT3G04320	--	Kunitz family trypsin and protease inhibitor protein
BnaA08G0287100ZS	M_WCS417_30m	M_Control	156.615	38.8302	97.7226	2.00923	0.30866	6.5095	7.53992e-11	2.96644e-09	Up	M_WCS417_30m-M_Control	RNA	AT1G10740	LDAH1	alpha/beta-Hydrolases superfamily protein
BnaA01G0214800ZS	M_WCS417_30m	M_Control	32.587	144.316	88.4516	-2.14905	0.330543	-6.50159	7.94755e-11	3.12439e-09	Down	M_WCS417_30m-M_Control	RNA	AT3G50060	MYB77	Encodes a member of the R2R3 transcription factor gene family. Expressed in response to potassium deprivation and auxin. Involved in lateral root development. Interacts with ARF7 and regulates the expression of some auxin responsive genes.
BnaC03G0665000ZS	M_WCS417_30m	M_Control	117.835	21.6554	69.7451	2.45161	0.377088	6.50143	7.95589e-11	3.12525e-09	Up	M_WCS417_30m-M_Control	RNA	AT1G30320	--	Remorin family protein
BnaC02G0363900ZS	M_WCS417_30m	M_Control	1614.78	2656.26	2135.52	-0.718186	0.110484	-6.50037	8.01203e-11	3.14486e-09	Normal	M_WCS417_30m-M_Control	RNA	AT4G11320	CP2	Papain family cysteine protease
BnaA10G0168800ZS	M_WCS417_30m	M_Control	1670.39	2756.7	2213.55	-0.722808	0.111201	-6.50001	8.03137e-11	3.15001e-09	Normal	M_WCS417_30m-M_Control	RNA	--	--	--
BnaC08G0030700ZS	M_WCS417_30m	M_Control	91.9729	262.625	177.299	-1.51292	0.232869	-6.49686	8.2011e-11	3.2141e-09	Down	M_WCS417_30m-M_Control	RNA	AT1G07630	PLL5	Encodes a protein phosphatase 2C like gene, similar to POL. Involved in leaf development. Knockout mutants have abnormally shaped leaves.
BnaA07G0091900ZS	M_WCS417_30m	M_Control	213.119	66.2971	139.708	1.68523	0.25945	6.4954	8.28132e-11	3.24303e-09	Up	M_WCS417_30m-M_Control	RNA	AT1G29160	COG1	Dof-type zinc finger DNA-binding family protein
BnaC06G0024100ZS	M_WCS417_30m	M_Control	261.651	576.911	419.281	-1.14032	0.175698	-6.49022	8.57094e-11	3.35297e-09	Down	M_WCS417_30m-M_Control	RNA	--	--	--
BnaA04G0074700ZS	M_WCS417_30m	M_Control	79.308	238.038	158.673	-1.58525	0.244254	-6.49015	8.57531e-11	3.35297e-09	Down	M_WCS417_30m-M_Control	RNA	AT4G13770	REF2	Encodes a cytochrome p450 enzyme that catalyzes the initial conversion of aldoximes to thiohydroximates in the synthesis of glucosinolates not derived from tryptophan. Also has a role in auxin homeostasis.
BnaC06G0428900ZS	M_WCS417_30m	M_Control	213085	137595	175340	0.631	0.0972372	6.48929	8.62405e-11	3.36943e-09	Normal	M_WCS417_30m-M_Control	RNA	AT1G21310	RSH	Encodes extensin 3.
BnaA08G0137800ZS	M_WCS417_30m	M_Control	6545.61	4174.09	5359.85	0.649019	0.100025	6.48855	8.66652e-11	3.38342e-09	Normal	M_WCS417_30m-M_Control	RNA	AT4G05320	UBQ10	One of five polyubiquitin genes in A. thaliana. These genes encode the highly conserved 76-amino acid protein ubiquitin that is covalently attached to substrate proteins targeting most for degradation. Polyubiquitin genes are characterized by the presence of tandem repeats of the 228 bp that encode a ubiquitin monomer. Induced by salicylic acid. Independent of NPR1 for their induction by salicyli…
BnaC05G0410500ZS	M_WCS417_30m	M_Control	98.0078	14.2481	56.1279	2.78923	0.430133	6.48458	8.8978e-11	3.47103e-09	Up	M_WCS417_30m-M_Control	RNA	AT3G18773	ATL77	RING/U-box superfamily protein
BnaC06G0407000ZS	M_WCS417_30m	M_Control	608.912	297.843	453.378	1.03116	0.159043	6.48352	8.96055e-11	3.49282e-09	Up	M_WCS417_30m-M_Control	RNA	AT1G74360	NILR1	Leucine-rich repeat protein kinase family protein
BnaC05G0214400ZS	M_WCS417_30m	M_Control	3115.12	1920.33	2517.73	0.697892	0.107668	6.48188	9.05896e-11	3.52847e-09	Normal	M_WCS417_30m-M_Control	RNA	AT1G27130	GSTU13	Encodes glutathione transferase belonging to the tau class of GSTs. Naming convention according to Wagner et al. (2002).
BnaC04G0571000ZS	M_WCS417_30m	M_Control	1720.68	2803.92	2262.3	-0.704415	0.108705	-6.48009	9.16709e-11	3.56784e-09	Normal	M_WCS417_30m-M_Control	RNA	AT2G40000	HSPRO2	ortholog of sugar beet HS1 PRO-1 2
BnaA06G0387000ZS	M_WCS417_30m	M_Control	470.18	211.949	341.065	1.14869	0.177354	6.47684	9.36657e-11	3.64268e-09	Up	M_WCS417_30m-M_Control	RNA	AT3G26910	--	hydroxyproline-rich glycoprotein family protein
BnaA04G0039200ZS	M_WCS417_30m	M_Control	489.181	226.353	357.767	1.11144	0.171737	6.47178	9.68534e-11	3.76376e-09	Up	M_WCS417_30m-M_Control	RNA	AT3G55740	PROT2	Encodes a proline transporter with affinity for gly betaine, proline, and GABA. Protein is expressed most highly in the roots.
BnaC01G0026000ZS	M_WCS417_30m	M_Control	986.667	1686.15	1336.41	-0.773261	0.119494	-6.47115	9.72572e-11	3.77656e-09	Normal	M_WCS417_30m-M_Control	RNA	AT4G36520	AUXILIN-LIKE4	Chaperone DnaJ-domain superfamily protein
BnaA01G0010200ZS	M_WCS417_30m	M_Control	186.089	50.6561	118.373	1.87116	0.2894	6.46568	1.00847e-10	3.91295e-09	Up	M_WCS417_30m-M_Control	RNA	AT4G38060	CCI2	--
BnaC05G0033200ZS	M_WCS417_30m	M_Control	452.997	203.164	328.08	1.15792	0.179092	6.46549	1.00969e-10	3.9147e-09	Up	M_WCS417_30m-M_Control	RNA	AT1G05010	EFE	Encodes 1-aminocyclopropane-1-carboxylate oxidase
BnaA03G0431300ZS	M_WCS417_30m	M_Control	2040.88	1185.3	1613.09	0.784403	0.121379	6.46245	1.03023e-10	3.99129e-09	Normal	M_WCS417_30m-M_Control	RNA	AT4G12720	NUDT7	Encodes a protein with ADP-ribose hydrolase activity. Negatively regulates EDS1-conditioned plant defense and programmed cell death.
BnaA06G0177300ZS	M_WCS417_30m	M_Control	115.207	21.0888	68.1478	2.4549	0.379971	6.46077	1.04171e-10	4.03267e-09	Up	M_WCS417_30m-M_Control	RNA	AT3G47340	DIN6	encodes a glutamine-dependent asparagine synthetase, the predicted ASN1 peptide contains a purF-type glutamine-binding domain, and is expressed predominantly in shoot tissues, where light has a negative effect on its mRNA accumulation. Expression is induced within 3 hours of dark treatment, in senescing leaves and treatment with exogenous photosynthesis inhibitor. Induction of gene expression was…
BnaC09G0084900ZS	M_WCS417_30m	M_Control	101.605	15.9947	58.7997	2.66301	0.412862	6.45011	1.11768e-10	4.32346e-09	Up	M_WCS417_30m-M_Control	RNA	AT5G64750	ERF111	Encodes a putative transcription factor containing an AP2 domain. Is a member of the ERF (ethylene response factor) subfamily B-4 of ERF/AP2 transcription factor family. Expressed in response to ABA, osmotic stress, sugar stress and drought. Mutants are hypersensitive to these stresses. May be involved in regulation of ABA mediated stress response.
BnaC05G0117600ZS	M_WCS417_30m	M_Control	363.921	152.191	258.056	1.25816	0.195249	6.44386	1.16471e-10	4.50194e-09	Up	M_WCS417_30m-M_Control	RNA	AT1G14540	PRX4	Peroxidase superfamily protein
BnaC09G0546200ZS	M_WCS417_30m	M_Control	776.232	1353.25	1064.74	-0.801775	0.124481	-6.44092	1.18751e-10	4.58657e-09	Normal	M_WCS417_30m-M_Control	RNA	AT5G11070	--	--
BnaA07G0014400ZS	M_WCS417_30m	M_Control	347.795	690.423	519.109	-0.989289	0.153609	-6.44029	1.19243e-10	4.60072e-09	Normal	M_WCS417_30m-M_Control	RNA	AT2G19110	HMA4	--
BnaA07G0240900ZS	M_WCS417_30m	M_Control	155.171	35.9554	95.5632	2.11683	0.328688	6.44022	1.19299e-10	4.60072e-09	Up	M_WCS417_30m-M_Control	RNA	--	--	--
BnaA01G0000700ZS	M_WCS417_30m	M_Control	669.086	331.631	500.359	1.01209	0.157174	6.43926	1.20056e-10	4.62641e-09	Up	M_WCS417_30m-M_Control	RNA	AT3G45970	EXPL1	member of EXPANSIN-LIKE. Naming convention from the Expansin Working Group (Kende et al, 2004. Plant Mol Bio)
BnaC03G0052300ZS	M_WCS417_30m	M_Control	4482.78	2832.86	3657.82	0.662124	0.102837	6.4386	1.20582e-10	4.64316e-09	Normal	M_WCS417_30m-M_Control	RNA	AT5G11670	NADP-ME2	The malic enzyme (EC 1.1.1.40) encoded by AtNADP-ME2 is presumably a cytosolic enzyme involved in malate metabolism and possibly assisting the oxidative pentose phosphate pathway. AtNADP-ME2 counts for the major part of NADP-ME activity in mature tissues of Arabidopsis.
BnaA02G0325300ZS	M_WCS417_30m	M_Control	530.003	243.699	386.851	1.12265	0.174431	6.43608	1.22601e-10	4.7173e-09	Up	M_WCS417_30m-M_Control	RNA	AT2G02870	--	Galactose oxidase/kelch repeat superfamily protein
BnaA08G0015900ZS	M_WCS417_30m	M_Control	67.6436	213.441	140.542	-1.65896	0.257782	-6.43554	1.23035e-10	4.7304e-09	Down	M_WCS417_30m-M_Control	RNA	AT1G53170	ERF8	encodes a member of the ERF (ethylene response factor) subfamily B-1 of ERF/AP2 transcription factor family (ATERF-8). The protein contains one AP2 domain. There are 15 members in this subfamily including ATERF-3, ATERF-4, ATERF-7, and leafy petiole.
BnaC03G0272400ZS	M_WCS417_30m	M_Control	949.321	1667.49	1308.41	-0.812594	0.126434	-6.42701	1.30135e-10	4.99958e-09	Normal	M_WCS417_30m-M_Control	RNA	AT2G28720	HTB3	Histone superfamily protein
BnaA09G0575800ZS	M_WCS417_30m	M_Control	319.781	126.679	223.23	1.33573	0.20784	6.42672	1.3039e-10	5.00561e-09	Up	M_WCS417_30m-M_Control	RNA	AT2G25250	--	--
BnaA07G0198600ZS	M_WCS417_30m	M_Control	359.602	149.769	254.686	1.2628	0.19651	6.42615	1.30873e-10	5.02034e-09	Up	M_WCS417_30m-M_Control	RNA	AT3G57330	ACA11	Lesion mimic phenotype when mutation in the gene is combined with a mutation in ACA4. Lesion mimic phenotype of double knockout can be suppressed by nutritional supplements that increase anion levels (e.g. 15 mM Nitrate, Chloride, or Phosphate)
Bnascaffold0025G0034800ZS	M_WCS417_30m	M_Control	493.436	204.579	349.008	1.26679	0.197167	6.42497	1.31895e-10	5.0557e-09	Up	M_WCS417_30m-M_Control	RNA	AT5G44070	PCS1	Phytochelatin synthase gene confers tolerance to cadmium ions. Catalyzes phytochelatin (PC) synthesis from glutathione (GSH) in the presence of Cd2+, Zn2+, Cu2+ and Fe3+, but not by Co2+ or Ni2+.
BnaA08G0277400ZS	M_WCS417_30m	M_Control	6.09818	77.4006	41.7494	-3.66779	0.571288	-6.42021	1.36089e-10	5.21252e-09	Down	M_WCS417_30m-M_Control	RNA	AT1G12805	--	nucleotide binding
BnaC08G0507100ZS	M_WCS417_30m	M_Control	350.082	142.668	246.375	1.29313	0.201501	6.41751	1.3852e-10	5.30088e-09	Up	M_WCS417_30m-M_Control	RNA	AT1G12240	VIN2	Encodes a vacuolar invertase betaFruct4. betaFruct4 is transported from the endoplasmic reticulum through the intermediate compartments as a membrane protein. The N-terminal cytoplasmic domain contains multiple sequence motifs that are involved at various stages in the trafficking of betaFruct4 from the ER to the central vacuole.
BnaA07G0036900ZS	M_WCS417_30m	M_Control	176.179	422.723	299.451	-1.26367	0.196913	-6.41742	1.38605e-10	5.30088e-09	Down	M_WCS417_30m-M_Control	RNA	AT2G16365	PCH1	F-box family protein
BnaC01G0453000ZS	M_WCS417_30m	M_Control	189.417	458.795	324.106	-1.27749	0.199095	-6.41649	1.39448e-10	5.32909e-09	Down	M_WCS417_30m-M_Control	RNA	AT3G13040	gammaMYB2	myb-like HTH transcriptional regulator family protein
BnaC05G0128700ZS	M_WCS417_30m	M_Control	591.444	1067.29	829.368	-0.851488	0.132733	-6.41506	1.40765e-10	5.37539e-09	Normal	M_WCS417_30m-M_Control	RNA	AT1G15430	--	Protein of unknown function (DUF1644)
BnaC04G0377900ZS	M_WCS417_30m	M_Control	202.883	60.4386	131.661	1.75166	0.273073	6.41464	1.4116e-10	5.38346e-09	Up	M_WCS417_30m-M_Control	RNA	AT5G38710	PDH2	Methylenetetrahydrofolate reductase family protein
BnaC02G0203400ZS	M_WCS417_30m	M_Control	189.933	430.121	310.027	-1.17963	0.183898	-6.4146	1.41189e-10	5.38346e-09	Down	M_WCS417_30m-M_Control	RNA	AT1G66140	ZFP4	Encodes a zinc finger protein containing only a single zinc finger.
BnaC01G0084400ZS	M_WCS417_30m	M_Control	1350.26	771.592	1060.93	0.807344	0.125912	6.41196	1.43659e-10	5.4735e-09	Normal	M_WCS417_30m-M_Control	RNA	AT4G30210	ATR2	Encodes NADPH-cytochrome P450 reductase that catalyzes the first oxidative step of the phenylpropanoid general pathway.
BnaC08G0397100ZS	M_WCS417_30m	M_Control	140.98	358.111	249.546	-1.34655	0.210013	-6.41175	1.43856e-10	5.47689e-09	Down	M_WCS417_30m-M_Control	RNA	AT3G60550	CYCP3;2	cyclin p3;2
BnaA02G0187100ZS	M_WCS417_30m	M_Control	354.584	148.178	251.381	1.259	0.196412	6.41	1.45519e-10	5.53607e-09	Up	M_WCS417_30m-M_Control	RNA	AT1G56130	--	Leucine-rich repeat transmembrane protein kinase
BnaA05G0341500ZS	M_WCS417_30m	M_Control	169.121	41.8089	105.465	2.00793	0.313351	6.40793	1.47507e-10	5.60748e-09	Up	M_WCS417_30m-M_Control	RNA	AT3G21700	SGP2	Monomeric G protein. Expressed in root epidermal cells that are destined to become atrichoblasts. Also expressed during pollen development and in the pollen tube tip.
BnaA02G0190100ZS	M_WCS417_30m	M_Control	106.075	17.9492	62.0123	2.55989	0.399672	6.40499	1.50381e-10	5.71246e-09	Up	M_WCS417_30m-M_Control	RNA	AT1G70700	TIFY7	JAZ9 is a protein presumed to be involved in jasmonate signaling. JAZ9 transcript levels rise in response to a jasmonate stimulus. JAZ9 can interact with the COI1 F-box subunit of an SCF E3 ubiquitin ligase in a yeast-two-hybrid assay only in the presence of jasmonate-isoleucine (JA-ILE) or coronatine. The Jas domain appears to be important for JAZ9-COI1 interactions in the presence of coronatine…
BnaC05G0176500ZS	M_WCS417_30m	M_Control	282.359	578.205	430.282	-1.03394	0.161437	-6.4046	1.50766e-10	5.7228e-09	Down	M_WCS417_30m-M_Control	RNA	AT1G20700	WOX14	Encodes a WUSCHEL-related homeobox gene family member with 65 amino acids in its homeodomain. Proteins in this family contain a sequence of eight residues (TLPLFPMH) downstream of the homeodomain called the WUS box. Functions in the shoot meristem organizing center to maintain the stem cells in an undifferentiated state.
BnaA03G0400200ZS	M_WCS417_30m	M_Control	1679.69	981.638	1330.66	0.774872	0.121098	6.39874	1.56665e-10	5.94224e-09	Normal	M_WCS417_30m-M_Control	RNA	AT5G02500	HSP70-1	encodes a member of heat shock protein 70 family.
BnaA09G0563200ZS	M_WCS417_30m	M_Control	474.601	907.491	691.046	-0.935307	0.146251	-6.3952	1.60334e-10	6.07687e-09	Normal	M_WCS417_30m-M_Control	RNA	AT3G62260	PP2C49	Protein phosphatase 2C family protein
BnaC04G0403600ZS	M_WCS417_30m	M_Control	143.355	34.6664	89.0105	2.04924	0.321127	6.38139	1.75485e-10	6.64614e-09	Up	M_WCS417_30m-M_Control	RNA	AT5G40390	SIP1	Encodes a protein which might be involved in the formation of verbascose. A T-DNA insertion mutant was shown to have a decreased amount of verbascose (as well as mannitol) whereas the levels of raffinose and stachyose remained unchanged.
BnaC07G0101800ZS	M_WCS417_30m	M_Control	864.235	457.919	661.077	0.917211	0.143759	6.38019	1.76868e-10	6.6935e-09	Normal	M_WCS417_30m-M_Control	RNA	AT3G24530	--	AAA-type ATPase family protein / ankyrin repeat family protein
BnaC03G0749800ZS	M_WCS417_30m	M_Control	1392.81	804.553	1098.68	0.791466	0.124054	6.37999	1.77096e-10	6.69712e-09	Normal	M_WCS417_30m-M_Control	RNA	AT4G34030	MCCB	MCC-B is involved in leucine degradation in mitochondria. The active protein is a dimer of MCC-A and MCC-B. MCC-A is biotinylated whereas MCC-B is not.
BnaA03G0548600ZS	M_WCS417_30m	M_Control	94.0215	12.4445	53.233	2.90232	0.454966	6.3792	1.78012e-10	6.72676e-09	Up	M_WCS417_30m-M_Control	RNA	AT4G35180	LHT7	LYS/HIS transporter 7
BnaA07G0266400ZS	M_WCS417_30m	M_Control	111.03	19.4411	65.2357	2.51238	0.393858	6.37891	1.78356e-10	6.73473e-09	Up	M_WCS417_30m-M_Control	RNA	AT1G70700	TIFY7	JAZ9 is a protein presumed to be involved in jasmonate signaling. JAZ9 transcript levels rise in response to a jasmonate stimulus. JAZ9 can interact with the COI1 F-box subunit of an SCF E3 ubiquitin ligase in a yeast-two-hybrid assay only in the presence of jasmonate-isoleucine (JA-ILE) or coronatine. The Jas domain appears to be important for JAZ9-COI1 interactions in the presence of coronatine…
BnaC01G0175600ZS	M_WCS417_30m	M_Control	38.0423	151.983	95.0128	-1.9972	0.313319	-6.37434	1.83754e-10	6.93341e-09	Down	M_WCS417_30m-M_Control	RNA	AT4G24110	HUP40	--
BnaA05G0421900ZS	M_WCS417_30m	M_Control	356.076	145.813	250.944	1.28817	0.202094	6.37411	1.84029e-10	6.93862e-09	Up	M_WCS417_30m-M_Control	RNA	AT3G12920	BRG3	Encodes one of the BRGs (BOI-related gene) involved in resistance to Botrytis cinerea.
BnaA04G0145000ZS	M_WCS417_30m	M_Control	428.778	192.664	310.721	1.15353	0.18109	6.36989	1.89158e-10	7.12668e-09	Up	M_WCS417_30m-M_Control	RNA	AT2G22330	CYP79B3	Encodes a cytochrome P450. Involved in tryptophan metabolism. Converts Trp to indole-3-acetaldoxime (IAOx), a precursor to IAA and indole glucosinolates.
BnaC03G0220300ZS	M_WCS417_30m	M_Control	406.276	178.52	292.398	1.18575	0.186186	6.36863	1.90728e-10	7.18051e-09	Up	M_WCS417_30m-M_Control	RNA	AT2G38760	AtANN3	Annexins are calcium binding proteins that are localized in the cytoplasm. When cytosolic Ca2+ increases, they relocate to the plasma membrane.
BnaA06G0406200ZS	M_WCS417_30m	M_Control	503.647	925.223	714.435	-0.877494	0.137835	-6.36626	1.93698e-10	7.28691e-09	Normal	M_WCS417_30m-M_Control	RNA	AT2G01170	GABP	Encodes a bidirectional amino acid transporter that can transport ala, arg, glu and lys, GABA but not pro with both export and import activity. Its expression is localized in the vascular tissues suggesting a function in amino acids export from the phloem into sink tissue.
BnaC07G0529700ZS	M_WCS417_30m	M_Control	3085.05	1889.38	2487.22	0.707345	0.111191	6.36155	1.99724e-10	7.50802e-09	Normal	M_WCS417_30m-M_Control	RNA	AT4G36040	J11	Chaperone DnaJ-domain superfamily protein
BnaA07G0198300ZS	M_WCS417_30m	M_Control	175.704	49.9906	112.847	1.81114	0.284727	6.36099	2.0046e-10	7.53011e-09	Up	M_WCS417_30m-M_Control	RNA	AT3G57240	GNS3	encodes a member of glycosyl hydrolase family 17
BnaA04G0174800ZS	M_WCS417_30m	M_Control	261.905	548.071	404.988	-1.06479	0.1675	-6.35697	2.05772e-10	7.72392e-09	Down	M_WCS417_30m-M_Control	RNA	AT2G26980	SnRK3.17	encodes a serine-threonine protein kinase whose expression increases in response to abscisic acid, cold, drought, high salt, and wounding conditions. The gene is expressed in developing seeds and seedlings. Lines carrying a T-DNA insertions have reduced germination efficiency and expression of cold, high-salt, and abscisic acid marker genes are altered, but not drought-response markers.
BnaC04G0513900ZS	M_WCS417_30m	M_Control	413.055	178.884	295.969	1.20719	0.189981	6.35424	2.09455e-10	7.85636e-09	Up	M_WCS417_30m-M_Control	RNA	AT2G31800	--	Integrin-linked protein kinase family
BnaC07G0258200ZS	M_WCS417_30m	M_Control	595.073	1066.31	830.692	-0.841444	0.132426	-6.35409	2.09666e-10	7.85845e-09	Normal	M_WCS417_30m-M_Control	RNA	AT5G47230	ERF5	encodes a member of the ERF (ethylene response factor) subfamily B-3 of ERF/AP2 transcription factor family (ATERF-5). The protein contains one AP2 domain. There are 18 members in this subfamily including ATERF-1, ATERF-2, AND ATERF-5.
BnaC04G0532900ZS	M_WCS417_30m	M_Control	553.187	1011.57	782.378	-0.871117	0.137258	-6.34656	2.20189e-10	8.24677e-09	Normal	M_WCS417_30m-M_Control	RNA	AT1G29930	LHCB1.3	Subunit of light-harvesting complex II (LHCII),which absorbs light and transfers energy to the photosynthetic reaction center.
BnaC05G0004900ZS	M_WCS417_30m	M_Control	764.726	1326.23	1045.48	-0.794465	0.125208	-6.34517	2.22178e-10	8.31511e-09	Normal	M_WCS417_30m-M_Control	RNA	AT1G01720	ATAF1	Belongs to a large family of putative transcriptional activators with NAC domain. Transcript level increases in response to wounding and abscisic acid. ATAF1 attentuates ABA signaling and sythesis. Mutants are hyposensitive to ABA.
BnaC03G0773900ZS	M_WCS417_30m	M_Control	352.71	147.866	250.288	1.25331	0.197633	6.34159	2.27406e-10	8.50446e-09	Up	M_WCS417_30m-M_Control	RNA	AT4G30240	NISP	Syntaxin/t-SNARE family protein
BnaC04G0065900ZS	M_WCS417_30m	M_Control	78.3075	7.71408	43.0108	3.33325	0.525775	6.33969	2.30235e-10	8.60393e-09	Up	M_WCS417_30m-M_Control	RNA	AT2G40180	PP2C5	Encodes PP2C5, a member of the PP2C family phosphatases. PP2C5 acts as a MAPK phosphatase that positively regulates seed germination, stomatal closure and ABA-inducible gene expression.
BnaA07G0133600ZS	M_WCS417_30m	M_Control	69.2077	214.933	142.07	-1.63629	0.258255	-6.33595	2.35884e-10	8.80855e-09	Down	M_WCS417_30m-M_Control	RNA	AT1G20310	--	--
BnaC02G0432800ZS	M_WCS417_30m	M_Control	1119.45	1944.99	1532.22	-0.797376	0.125915	-6.33263	2.41012e-10	8.9934e-09	Normal	M_WCS417_30m-M_Control	RNA	AT2G02130	PDF2.3	Predicted to encode a PR (pathogenesis-related) protein. Belongs to the plant defensin (PDF) family with the following members: At1g75830/PDF1.1, At5g44420/PDF1.2a, At2g26020/PDF1.2b, At5g44430/PDF1.2c, At2g26010/PDF1.3, At1g19610/PDF1.4, At1g55010/PDF1.5, At2g02120/PDF2.1, At2g02100/PDF2.2, At2g02130/PDF2.3, At1g61070/PDF2.4, At5g63660/PDF2.5, At2g02140/PDF2.6, At5g38330/PDF3.1 and At4g30070/PDF…
BnaC04G0566200ZS	M_WCS417_30m	M_Control	1121.83	1886.89	1504.36	-0.750078	0.118723	-6.31787	2.65195e-10	9.88852e-09	Normal	M_WCS417_30m-M_Control	RNA	AT2G39310	JAL22	jacalin-related lectin 22
BnaC07G0176500ZS	M_WCS417_30m	M_Control	102.526	273.984	188.255	-1.41745	0.22441	-6.31631	2.67885e-10	9.97892e-09	Down	M_WCS417_30m-M_Control	RNA	AT1G22990	HIPP22	Heavy metal transport/detoxification superfamily protein
BnaA02G0102700ZS	M_WCS417_30m	M_Control	530.487	253.461	391.974	1.06587	0.168751	6.31623	2.68013e-10	9.97892e-09	Up	M_WCS417_30m-M_Control	RNA	AT5G59780	MYB59	Encodes a putative transcription factor (MYB59).
BnaA04G0156100ZS	M_WCS417_30m	M_Control	208.966	471.663	340.314	-1.17376	0.185854	-6.31549	2.69306e-10	1.00197e-08	Down	M_WCS417_30m-M_Control	RNA	AT2G23760	SAW2	Encodes a member of the BEL family of homeodomain proteins. Plants doubly mutant for saw1/saw2 (blh2/blh4) have serrated leaves. BP is expressed in the serrated leaves, therefore saw2 and saw1 may act redundantly to repress BP in leaves.
BnaC01G0106500ZS	M_WCS417_30m	M_Control	194.078	429.149	311.613	-1.14516	0.181336	-6.31513	2.69937e-10	1.00358e-08	Down	M_WCS417_30m-M_Control	RNA	AT4G17670	--	Protein of unknown function (DUF581)
BnaC09G0223200ZS	M_WCS417_30m	M_Control	1529.23	881.024	1205.13	0.795036	0.125991	6.31025	2.7858e-10	1.03495e-08	Normal	M_WCS417_30m-M_Control	RNA	AT5G44130	FLA13	FASCICLIN-like arabinogalactan protein 13 precursor
BnaC06G0106600ZS	M_WCS417_30m	M_Control	97.6659	265.443	181.555	-1.44321	0.228848	-6.30641	2.85578e-10	1.05971e-08	Down	M_WCS417_30m-M_Control	RNA	AT4G10250	HSP22	Columbia endomembrane-localized small heat shock protein
BnaA06G0296500ZS	M_WCS417_30m	M_Control	371.378	712.759	542.068	-0.940401	0.149119	-6.30637	2.85661e-10	1.05971e-08	Normal	M_WCS417_30m-M_Control	RNA	AT5G64660	CMPG2	CYS, MET, PRO, and GLY protein 2
BnaA05G0499900ZS	M_WCS417_30m	M_Control	30.4275	137.829	84.1284	-2.17991	0.346173	-6.29716	3.03142e-10	1.12291e-08	Down	M_WCS417_30m-M_Control	RNA	AT1G52560	HSP26.5	HSP20-like chaperones superfamily protein
BnaC09G0152500ZS	M_WCS417_30m	M_Control	240.846	514.038	377.442	-1.09303	0.173678	-6.29342	3.10545e-10	1.14913e-08	Down	M_WCS417_30m-M_Control	RNA	AT1G64640	ENODL8	early nodulin-like protein 8
BnaA07G0271500ZS	M_WCS417_30m	M_Control	132.722	30.0349	81.3787	2.13948	0.339958	6.29336	3.10674e-10	1.14913e-08	Up	M_WCS417_30m-M_Control	RNA	AT1G69490	NAP	Encodes a member of the NAC transcription factor gene family. It is expressed in floral primordia and upregulated by AP3 and PI. Its expression is associated with leaf senescence.
BnaA02G0259900ZS	M_WCS417_30m	M_Control	242.673	84.3453	163.509	1.52212	0.241935	6.29142	3.14574e-10	1.16271e-08	Up	M_WCS417_30m-M_Control	RNA	AT4G04540	CRK39	Encodes a cysteine-rich receptor-like protein kinase.
BnaC06G0438100ZS	M_WCS417_30m	M_Control	308.363	120.103	214.233	1.36324	0.216738	6.28981	3.17863e-10	1.17317e-08	Up	M_WCS417_30m-M_Control	RNA	AT1G78100	AUF1	F-box family protein
BnaA01G0231800ZS	M_WCS417_30m	M_Control	734.378	1283.99	1009.19	-0.806385	0.128205	-6.2898	3.17868e-10	1.17317e-08	Normal	M_WCS417_30m-M_Control	RNA	AT3G46600	--	GRAS family transcription factor
BnaA10G0233900ZS	M_WCS417_30m	M_Control	517.338	246.101	381.72	1.07132	0.17049	6.2838	3.30394e-10	1.21851e-08	Up	M_WCS417_30m-M_Control	RNA	AT5G11650	MAGL13	alpha/beta-Hydrolases superfamily protein
BnaA05G0111000ZS	M_WCS417_30m	M_Control	1953.42	1158.46	1555.94	0.75378	0.120038	6.27951	3.39645e-10	1.25172e-08	Normal	M_WCS417_30m-M_Control	RNA	AT2G33150	PKT3	Encodes an organellar (peroxisome, glyoxysome) 3-ketoacyl-CoA thiolase, involved in fatty acid b-oxidation during germination and subsequent seedling growth. Mutants have defects in glyoxysomal fatty acid beta-oxidation. EC2.3.1.16 thiolase.
BnaA04G0109300ZS	M_WCS417_30m	M_Control	254.607	532.826	393.716	-1.06615	0.169819	-6.27818	3.42562e-10	1.26156e-08	Down	M_WCS417_30m-M_Control	RNA	AT5G39670	CML46	Calcium-binding EF-hand family protein
BnaA07G0225900ZS	M_WCS417_30m	M_Control	808.468	423.456	615.962	0.93355	0.148721	6.27717	3.44791e-10	1.26884e-08	Normal	M_WCS417_30m-M_Control	RNA	AT1G80300	NTT1	Encodes an ATP/ADP transporter.
BnaC01G0010200ZS	M_WCS417_30m	M_Control	1143.19	643.748	893.467	0.829096	0.132101	6.27622	3.46913e-10	1.27572e-08	Normal	M_WCS417_30m-M_Control	RNA	AT4G39950	CYP79B2	Belongs to cytochrome P450 and is involved in tryptophan metabolism. Converts Trp to indo-3-acetaldoxime (IAOx), a precursor to IAA and indole glucosinolates.
BnaC01G0025800ZS	M_WCS417_30m	M_Control	137.288	356.194	246.741	-1.37735	0.219488	-6.27527	3.49031e-10	1.28258e-08	Down	M_WCS417_30m-M_Control	RNA	AT4G36550	PUB5	ARM repeat superfamily protein
BnaA05G0469100ZS	M_WCS417_30m	M_Control	533.353	258.753	396.053	1.04288	0.166195	6.27503	3.49567e-10	1.28362e-08	Up	M_WCS417_30m-M_Control	RNA	AT3G06070	--	--
BnaA01G0352400ZS	M_WCS417_30m	M_Control	526.492	254.382	390.437	1.04868	0.167145	6.27405	3.51766e-10	1.29076e-08	Up	M_WCS417_30m-M_Control	RNA	AT3G14720	MPK19	member of MAP Kinase
BnaA04G0236300ZS	M_WCS417_30m	M_Control	4749.03	3028.59	3888.81	0.648882	0.103433	6.27346	3.53107e-10	1.29474e-08	Normal	M_WCS417_30m-M_Control	RNA	AT2G36830	TIP1;1	Encodes a tonoplast intrinsic protein, which functions as water channel. It has also been shown to be able to facilitate the transport of urea and hydrogen peroxide. Highly expressed in vascular tissues of the root, stem, cauline leaves and flowers but not in the apical meristems.
BnaA06G0018200ZS	M_WCS417_30m	M_Control	31.96	139.836	85.8978	-2.13002	0.339539	-6.27327	3.53535e-10	1.29538e-08	Down	M_WCS417_30m-M_Control	RNA	AT1G52560	HSP26.5	HSP20-like chaperones superfamily protein
BnaA02G0219900ZS	M_WCS417_30m	M_Control	6090.79	3827.32	4959.05	0.670146	0.106859	6.27132	3.58008e-10	1.31082e-08	Normal	M_WCS417_30m-M_Control	RNA	AT1G76180	ERD14	Encodes a dehydrin protein whose expression is induced early on in response to dehydration stress. This gene's expression to cold occurs in two waves, with early induction occurring within 1 h and secondary induction occurring 5 h after the beginning of cold stress. Expression is also induced in response to ABA but not in response to 2,4-D, BA, and GA3. ERD14 protein is capable of binding Ca2+, e…
BnaA06G0405900ZS	M_WCS417_30m	M_Control	1746.65	2810.88	2278.77	-0.68632	0.109459	-6.27009	3.60835e-10	1.32021e-08	Normal	M_WCS417_30m-M_Control	RNA	AT2G01850	XTH27	EXGT-A3 has homology to xyloglucan endotransglucosylases/hydrolases (XTHs). Mutants in this gene show a lesion mimic phenotype associated with leaf maturation and a reduction in the number of tertiary veins. Individual tracheary elements in the mutants are shorter, but phloem transport activity is not severely affected. EXGT-A3 plays a role in xyloglucan degradation in the differentiating trachea…
BnaA05G0065700ZS	M_WCS417_30m	M_Control	131.238	324.338	227.788	-1.30567	0.208393	-6.26541	3.71852e-10	1.35954e-08	Down	M_WCS417_30m-M_Control	RNA	AT2G39510	UMAMIT14	nodulin MtN21-like transporter family protein
BnaA05G0483600ZS	M_WCS417_30m	M_Control	104.217	277.212	190.715	-1.41258	0.225506	-6.26406	3.7509e-10	1.37039e-08	Down	M_WCS417_30m-M_Control	RNA	AT5G18370	DSC2	Disease resistance protein (TIR-NBS-LRR class) family
BnaC01G0164200ZS	M_WCS417_30m	M_Control	501.099	238.746	369.922	1.06874	0.170726	6.26	3.84974e-10	1.40549e-08	Up	M_WCS417_30m-M_Control	RNA	AT4G23320	CRK24	Encodes a cysteine-rich receptor-like protein kinase.
BnaC09G0061800ZS	M_WCS417_30m	M_Control	16.7621	100.189	58.4756	-2.57972	0.412152	-6.25915	3.87083e-10	1.41217e-08	Down	M_WCS417_30m-M_Control	RNA	AT5G23530	CXE18	carboxyesterase 18
BnaC06G0298600ZS	M_WCS417_30m	M_Control	332.588	665.559	499.074	-1.00062	0.159905	-6.25755	3.91064e-10	1.4247e-08	Down	M_WCS417_30m-M_Control	RNA	AT1G70780	--	--
BnaC07G0222000ZS	M_WCS417_30m	M_Control	2931.81	1744.86	2338.33	0.749007	0.119697	6.25755	3.9108e-10	1.4247e-08	Normal	M_WCS417_30m-M_Control	RNA	AT5G43780	ATPS4	sulfate adenylyltransferase, ATP sulfurylase
BnaC02G0149700ZS	M_WCS417_30m	M_Control	2550.21	1576.2	2063.21	0.694045	0.11092	6.25717	3.92016e-10	1.42708e-08	Normal	M_WCS417_30m-M_Control	RNA	AT5G56980	--	--
BnaA01G0001800ZS	M_WCS417_30m	M_Control	656.358	328.44	492.399	0.998074	0.159554	6.25539	3.96514e-10	1.44242e-08	Normal	M_WCS417_30m-M_Control	RNA	AT3G45970	EXPL1	member of EXPANSIN-LIKE. Naming convention from the Expansin Working Group (Kende et al, 2004. Plant Mol Bio)
BnaA08G0130000ZS	M_WCS417_30m	M_Control	315.82	126.726	221.273	1.31588	0.210442	6.25294	4.02793e-10	1.46421e-08	Up	M_WCS417_30m-M_Control	RNA	AT4G23550	WRKY29	Encodes WRKY DNA-binding protein 29 (WRKY29).
BnaC02G0425900ZS	M_WCS417_30m	M_Control	1114.97	626.033	870.501	0.832568	0.133195	6.25074	4.08521e-10	1.48397e-08	Normal	M_WCS417_30m-M_Control	RNA	AT2G01450	MPK17	member of MAP Kinase
BnaC09G0536700ZS	M_WCS417_30m	M_Control	149.652	358.178	253.915	-1.25834	0.201322	-6.25042	4.09363e-10	1.48559e-08	Down	M_WCS417_30m-M_Control	RNA	AT5G12020	HSP17.6II	17.6 kDa class II heat shock protein
BnaC04G0578700ZS	M_WCS417_30m	M_Control	226.943	501.188	364.066	-1.14172	0.182665	-6.25034	4.09553e-10	1.48559e-08	Down	M_WCS417_30m-M_Control	RNA	AT2G40900	UMAMIT11	nodulin MtN21-like transporter family protein
BnaA09G0547100ZS	M_WCS417_30m	M_Control	161.944	42.994	102.469	1.90817	0.305326	6.24962	4.11441e-10	1.49137e-08	Up	M_WCS417_30m-M_Control	RNA	AT3G60120	BGLU27	beta glucosidase 27
BnaA08G0263300ZS	M_WCS417_30m	M_Control	283.176	108.989	196.083	1.37887	0.220826	6.24414	4.26144e-10	1.54356e-08	Up	M_WCS417_30m-M_Control	RNA	AT1G17147	--	VQ motif-containing protein
BnaA10G0180400ZS	M_WCS417_30m	M_Control	530.836	253.81	392.323	1.06306	0.170372	6.23964	4.3857e-10	1.58744e-08	Up	M_WCS417_30m-M_Control	RNA	AT5G19440	--	similar to Eucalyptus gunnii alcohol dehydrogenase of unknown physiological function (GI:1143445), apple tree, PIR:T16995; NOT a cinnamyl-alcohol dehydrogenase
BnaA08G0251900ZS	M_WCS417_30m	M_Control	449.176	191.91	320.543	1.22929	0.197145	6.23544	4.50513e-10	1.6295e-08	Up	M_WCS417_30m-M_Control	RNA	AT1G19380	--	Protein of unknown function (DUF1195)
BnaC08G0443900ZS	M_WCS417_30m	M_Control	3732.69	5814.36	4773.53	-0.639315	0.102623	-6.22976	4.67137e-10	1.68842e-08	Normal	M_WCS417_30m-M_Control	RNA	AT2G22500	UCP5	Encodes one of the mitochondrial dicarboxylate carriers (DIC): DIC1 (AT2G22500), DIC2 (AT4G24570), DIC3 (AT5G09470).
BnaC09G0198700ZS	M_WCS417_30m	M_Control	524.364	255.676	390.02	1.03678	0.166551	6.22498	4.81616e-10	1.73952e-08	Up	M_WCS417_30m-M_Control	RNA	AT1G57680	Cand1	--
BnaC06G0448900ZS	M_WCS417_30m	M_Control	289.537	114.593	202.065	1.33767	0.215025	6.22101	4.93979e-10	1.78187e-08	Up	M_WCS417_30m-M_Control	RNA	AT1G79330	MCP2b	Metacaspase AtMCPb2/AMC6. Caspase family protein. Arginine/lysine-specific cysteine protease activity. Induces apoptosis in yeast. Contains Pfam domain, PF00656: ICE-like protease (caspase) p20 domain. Arabidopsis contains three type I MCP genes (MCP1a-c) and six type II MCP genes (MCP2a鈥揻): AtMCP1a/At5g64240, AtMCP1b/At1g02170, AtMCP1c/At4g25110, AtMCP2a/At1g79310, AtMCP2b/At1g79330, AtMCP2c/At1…
BnaA08G0124800ZS	M_WCS417_30m	M_Control	500.472	240.856	370.664	1.05456	0.169517	6.22098	4.94046e-10	1.78187e-08	Up	M_WCS417_30m-M_Control	RNA	AT4G21910	--	MATE efflux family protein
BnaA02G0414400ZS	M_WCS417_30m	M_Control	355.79	690.673	523.232	-0.957589	0.153946	-6.2203	4.96198e-10	1.78836e-08	Normal	M_WCS417_30m-M_Control	RNA	AT5G65660	--	hydroxyproline-rich glycoprotein family protein
BnaC04G0050000ZS	M_WCS417_30m	M_Control	414.049	188.297	301.173	1.1373	0.182881	6.21884	5.00855e-10	1.80386e-08	Up	M_WCS417_30m-M_Control	RNA	AT2G44450	BGLU15	beta glucosidase 15
BnaC03G0458000ZS	M_WCS417_30m	M_Control	415.249	785.112	600.181	-0.918848	0.14776	-6.21853	5.01826e-10	1.80608e-08	Normal	M_WCS417_30m-M_Control	RNA	AT3G22890	ATPS1	encodes ATP sulfurylase, the first enzyme in the sulfate assimilation pathway of Arabidopsis. It may also participate in selenium metabolism.
BnaC01G0081800ZS	M_WCS417_30m	M_Control	518.155	250.883	384.519	1.04557	0.168145	6.21828	5.02634e-10	1.8077e-08	Up	M_WCS417_30m-M_Control	RNA	AT4G30460	--	glycine-rich protein
BnaC01G0133800ZS	M_WCS417_30m	M_Control	330.508	133.27	231.889	1.31264	0.21124	6.214	5.16531e-10	1.85636e-08	Up	M_WCS417_30m-M_Control	RNA	AT4G20460	--	NAD(P)-binding Rossmann-fold superfamily protein
BnaC05G0284600ZS	M_WCS417_30m	M_Control	706.664	353.386	530.025	0.998814	0.160795	6.21173	5.24035e-10	1.882e-08	Normal	M_WCS417_30m-M_Control	RNA	AT1G32460	--	--
BnaC05G0378700ZS	M_WCS417_30m	M_Control	37.6213	148.958	93.2894	-1.98435	0.319472	-6.21133	5.25367e-10	1.88544e-08	Down	M_WCS417_30m-M_Control	RNA	AT3G20830	UCNL	AGC (cAMP-dependent, cGMP-dependent and protein kinase C) kinase family protein
BnaC05G0107000ZS	M_WCS417_30m	M_Control	469.424	215.136	342.28	1.12414	0.181248	6.20223	5.56682e-10	1.99641e-08	Up	M_WCS417_30m-M_Control	RNA	AT1G13560	ATAAPT1	Encodes aminoalcoholphosphotransferase AAPT1.
BnaC01G0192600ZS	M_WCS417_30m	M_Control	1022.45	568.334	795.391	0.847441	0.136756	6.19672	5.76524e-10	2.06611e-08	Normal	M_WCS417_30m-M_Control	RNA	AT4G25670	DOB1	--
BnaC02G0444000ZS	M_WCS417_30m	M_Control	295.071	587.265	441.168	-0.992585	0.160211	-6.19547	5.81117e-10	2.0811e-08	Normal	M_WCS417_30m-M_Control	RNA	AT2G03800	GEK1	encodes a D-aminoacyl-tRNA deacylase. Involved in detoxification of D-aminoacyl-tRNA. Mutants also show ethanol-hypersensitive phenotype.
BnaA03G0411400ZS	M_WCS417_30m	M_Control	260.031	98.0837	179.057	1.40747	0.227197	6.19493	5.83107e-10	2.08675e-08	Up	M_WCS417_30m-M_Control	RNA	AT5G61590	ERF107	encodes a member of the ERF (ethylene response factor) subfamily B-3 of ERF/AP2 transcription factor family. The protein contains one AP2 domain. There are 18 members in this subfamily including ATERF-1, ATERF-2, AND ATERF-5.
BnaA08G0235000ZS	M_WCS417_30m	M_Control	1946	1100.65	1523.32	0.821296	0.13258	6.19472	5.83889e-10	2.08807e-08	Normal	M_WCS417_30m-M_Control	RNA	AT1G23870	TPS9	Encodes an enzyme putatively involved in trehalose biosynthesis. The protein has a trehalose synthase (TPS)-like domain that may or may not be active as well as a trehalose phosphatase (TPP)-like domain.
[truncated: 49,225 more rows]

## Sheet: M_WCS417_6h-M_Control
Table S. Results of differential expression gene analysis of RNA-seq.
[truncated: 50,997 more rows]

## Sheet: M_WCS417_6h-M_WCS417_30m
Table S2. Results of differential expression gene analysis of RNA-seq.
[truncated: 50,777 more rows]
