# Supplementary material for: Integrated transcriptome and translatome analyses reveal the early regulatory network of Brassica napus roots in response to the growth-promoting rhizobacterium Pseudomonas simiae WCS417
Source: Research Square preprint supplement (doi:10.21203/rs.3.rs-7990582/v1), 2025-11-13
Supplement: Supplementary file 5 [file a9a7374c965f563b9fb493bc.xlsx]

## Sheet: t30_wt_up
Table S7. significants GO items enrichment of differential translation ratios genes.
ONTOLOGY	ID	Description	highlighted	adjusted_p_value	negative_log10_of_adjusted_p_value	term_size	qvalue_size	intersection_size	effective_domain_size	geneID
BP	GO:0050896	response to stimulus	TRUE	1.92718e-19	18.7151	6001	1830	683	21925	AT4G37290,AT4G36900,AT4G36800,AT4G35770,AT4G34600,AT4G32650,AT4G30280,AT4G28460,AT4G18390,AT4G25030,AT4G26610,AT4G27450,AT4G27670,AT4G15910,AT4G14890,AT4G14605,AT3G51460,AT3G49780,AT3G48750,AT1G56260,AT1G58180,AT1G59740,AT1G61890,AT3G24495,AT3G23940,AT3G20340,AT3G19290,AT3G09830,AT3G06550,AT3G05890,AT3G03990,AT5G02790,AT5G05600,AT5G06210,AT5G11670,AT5G13160,AT5G13200,AT5G14620,AT5G15450,AT5G15970…
BP	GO:0006950	response to stress	FALSE	6.07793e-16	15.2162	3733	1830	454	21925	AT4G37290,AT4G35770,AT4G30280,AT4G28460,AT4G25030,AT4G27450,AT4G27670,AT4G15910,AT4G14605,AT3G51460,AT3G49780,AT3G48750,AT1G56260,AT3G24495,AT3G23940,AT3G20340,AT3G19290,AT3G09830,AT3G06550,AT3G05890,AT5G05600,AT5G06210,AT5G13160,AT5G14620,AT5G15450,AT5G15970,AT5G17020,AT5G21090,AT5G22330,AT5G53570,AT5G53120,AT5G52300,AT3G44860,AT1G67560,AT1G68760,AT1G69890,AT1G70670,AT1G72520,AT1G74950,AT1G75280…
BP	GO:0071456	cellular response to hypoxia	FALSE	6.62977e-11	10.1785	239	1830	58	21925	AT4G30280,AT4G27450,AT3G49780,AT1G69890,AT5G45340,AT5G47910,AT5G26920,AT5G62520,AT5G65207,AT5G12020,AT2G26560,AT2G13790,AT2G15890,AT4G12720,AT4G22780,AT4G24160,AT4G27657,AT4G34150,AT2G32210,AT3G08720,AT3G10020,AT1G50740,AT1G19020,AT1G19530,AT5G24590,AT3G30775,AT5G41080,AT1G74310,AT1G28760,AT1G78070,AT1G07870,AT1G07135,AT5G44730,AT3G55790,AT3G60520,AT1G01720,AT5G20230,AT5G13190,AT4G24110,AT5G59820…
BP	GO:0048583	regulation of response to stimulus	FALSE	3.71574e-08	7.42995	791	1830	121	21925	AT4G18390,AT3G09830,AT5G05600,AT5G06210,AT5G13160,AT5G22330,AT1G74950,AT1G80840,AT5G45250,AT5G48380,AT5G27620,AT5G26920,AT5G62880,AT5G05190,AT5G18610,AT4G01895,AT4G01090,AT3G01090,AT4G12720,AT4G31800,AT4G32960,AT3G06110,AT3G52430,AT2G23070,AT2G25490,AT2G25930,AT2G29460,AT2G31870,AT2G42280,AT1G35670,AT3G17410,AT3G11820,AT3G09980,AT1G11960,AT1G14780,AT1G78570,AT1G18470,AT1G19180,AT1G19770,AT5G60410…
BP	GO:0031347	regulation of defense response	FALSE	1.46008e-07	6.83562	285	1830	58	21925	AT3G09830,AT5G05600,AT5G13160,AT5G22330,AT1G74950,AT1G80840,AT5G45250,AT5G48380,AT5G26920,AT5G05190,AT5G18610,AT4G01895,AT4G01090,AT4G12720,AT4G31800,AT3G06110,AT3G52430,AT2G29460,AT3G11820,AT3G09980,AT1G11960,AT1G19180,AT5G60410,AT5G62570,AT5G24590,AT5G24660,AT4G39260,AT5G66210,AT1G74710,AT1G30135,AT1G18670,AT1G17380,AT5G25440,AT3G55150,AT2G22300,AT1G19100,AT1G14370,AT1G11310,AT1G02450,AT5G13190…
BP	GO:0006955	immune response	FALSE	2.20005e-07	6.65757	273	1830	56	21925	AT4G37290,AT4G28460,AT3G09830,AT5G13160,AT5G45250,AT5G48380,AT5G26920,AT5G18610,AT2G26560,AT3G21220,AT3G16030,AT4G12720,AT3G06110,AT3G52430,AT3G09980,AT1G11960,AT1G14780,AT5G60410,AT4G39260,AT1G27130,AT1G73080,AT1G29690,AT1G28380,AT4G02640,AT5G25440,AT2G47130,AT1G01040,AT5G51700,AT5G13190,AT3G49500,AT5G05300,AT5G03320,AT5G56030,AT4G12560,AT5G14930,AT4G08500,AT3G18690,AT3G25070,AT5G64905,AT5G64900…
BP	GO:0045087	innate immune response	FALSE	5.42186e-07	6.26585	257	1830	53	21925	AT4G37290,AT4G28460,AT3G09830,AT5G13160,AT5G45250,AT5G48380,AT5G26920,AT5G18610,AT2G26560,AT3G21220,AT3G16030,AT4G12720,AT3G06110,AT3G52430,AT3G09980,AT1G11960,AT1G14780,AT5G60410,AT4G39260,AT1G27130,AT1G73080,AT1G29690,AT1G28380,AT4G02640,AT2G47130,AT1G01040,AT5G51700,AT5G13190,AT3G49500,AT5G05300,AT5G03320,AT5G56030,AT4G12560,AT5G14930,AT4G08500,AT3G18690,AT3G25070,AT5G64905,AT5G64900,AT2G39660…
BP	GO:0009266	response to temperature stimulus	FALSE	3.68738e-06	5.43328	644	1830	98	21925	AT4G27670,AT4G15910,AT3G48750,AT1G56260,AT3G05890,AT5G15450,AT5G17020,AT5G52300,AT5G46170,AT5G47910,AT5G12020,AT2G39770,AT3G05880,AT3G11170,AT4G14540,AT3G22840,AT4G15802,AT4G28210,AT4G34150,AT4G35985,AT5G36925,AT2G22540,AT2G25930,AT2G38170,AT2G38470,AT2G32120,AT2G30250,AT1G31812,AT3G19130,AT3G08720,AT1G50460,AT1G08780,AT5G60410,AT5G67590,AT5G23290,AT5G48570,AT5G47550,AT2G19450,AT4G39260,AT3G53600…
BP	GO:0009607	response to biotic stimulus	FALSE	9.02928e-06	5.04435	1488	1830	186	21925	AT4G37290,AT4G32650,AT4G28460,AT4G25030,AT1G59740,AT3G09830,AT3G06550,AT5G05600,AT5G13160,AT5G14620,AT5G22330,AT5G60550,AT5G57625,AT5G53120,AT3G44860,AT1G72520,AT1G80840,AT5G45250,AT5G47910,AT5G48380,AT5G49520,AT5G26920,AT5G05190,AT5G18110,AT5G18610,AT2G39770,AT2G24210,AT2G26560,AT4G01895,AT4G01090,AT3G04720,AT3G21220,AT3G16030,AT3G24800,AT2G06050,AT2G15890,AT5G60950,AT4G12720,AT4G31800,AT4G35985…
BP	GO:0071705	nitrogen compound transport	FALSE	4.05325e-05	4.3922	972	1830	130	21925	AT4G35860,AT4G35410,AT5G50460,AT1G59740,AT3G21865,AT3G15060,AT3G05040,AT5G02770,AT5G08040,AT5G08080,AT5G17020,AT1G73030,AT3G30725,AT5G02530,AT3G10640,AT5G25400,AT5G22950,AT5G50810,AT2G35190,AT5G61500,AT1G52360,AT4G24880,AT5G41000,AT2G42210,AT2G39890,AT3G19760,AT3G11820,AT3G17970,AT1G09860,AT1G19770,AT1G21380,AT5G27520,AT5G47960,AT3G27325,AT5G47520,AT5G43970,AT2G20840,AT2G19790,AT4G39260,AT1G26670…
BP	GO:0009409	response to cold	FALSE	0.000354431	3.45047	410	1830	65	21925	AT4G15910,AT3G48750,AT3G05890,AT5G52300,AT3G05880,AT3G11170,AT3G22840,AT4G28210,AT4G34150,AT4G35985,AT5G36925,AT2G25930,AT2G38170,AT2G38470,AT2G30250,AT1G31812,AT3G08720,AT1G50460,AT1G08780,AT5G60410,AT5G67590,AT5G23290,AT2G19450,AT4G39260,AT3G53600,AT3G53990,AT1G74710,AT1G10760,AT4G02330,AT1G29990,AT1G22882,AT2G22300,AT1G03680,AT1G01120,AT1G03760,AT5G20230,AT5G12380,AT1G61520,AT3G26744,AT3G14080…
BP	GO:0042742	defense response to bacterium	FALSE	0.00114517	2.94113	363	1830	58	21925	AT4G28460,AT4G25030,AT3G09830,AT5G13160,AT5G53120,AT1G80840,AT5G45250,AT5G48380,AT5G49520,AT5G26920,AT5G18610,AT2G39770,AT3G04720,AT4G12720,AT4G31800,AT3G52430,AT2G38470,AT3G09980,AT1G19180,AT5G62570,AT5G24660,AT3G30775,AT2G05940,AT5G66210,AT1G74710,AT1G79380,AT1G80600,AT4G34390,AT4G31750,AT1G18670,AT5G25440,AT4G23190,AT1G22882,AT3G55150,AT2G47130,AT2G22300,AT2G22240,AT1G14370,AT1G02450,AT5G51700…
BP	GO:0010337	regulation of salicylic acid metabolic process	TRUE	0.00121109	2.91682	16	1830	9	21925	AT3G09830,AT5G26920,AT3G52430,AT5G60410,AT1G29690,AT1G28380,AT5G03320,AT2G39660,AT1G73805
BP	GO:0006952	defense response	FALSE	0.00121576	2.91515	1636	1830	190	21925	AT4G37290,AT4G28460,AT4G25030,AT3G09830,AT3G06550,AT5G05600,AT5G13160,AT5G14620,AT5G21090,AT5G22330,AT5G53570,AT5G53120,AT1G74950,AT1G80840,AT2G07180,AT4G36150,AT5G45250,AT5G47910,AT5G48380,AT5G49520,AT5G26920,AT5G05190,AT5G18610,AT2G39770,AT2G27500,AT2G26560,AT4G07990,AT4G01895,AT4G01090,AT3G04720,AT3G21220,AT3G16030,AT3G24800,AT2G15890,AT4G12720,AT4G31800,AT3G06110,AT3G52430,AT3G52470,AT5G36925…
BP	GO:2000022	regulation of jasmonic acid mediated signaling pathway	FALSE	0.00145995	2.83566	39	1830	14	21925	AT5G05600,AT1G74950,AT3G52430,AT1G19180,AT3G53600,AT1G30135,AT1G17380,AT4G23810,AT3G17860,AT1G72450,AT1G70700,AT1G64280,AT1G15380,AT5G60300
BP	GO:0009651	response to salt stress	FALSE	0.0066687	2.17596	446	1830	65	21925	AT4G14605,AT3G23940,AT3G19290,AT5G06210,AT5G52300,AT5G62520,AT5G58003,AT2G39770,AT3G05880,AT4G12720,AT4G35985,AT2G35510,AT2G38170,AT2G47190,AT2G47770,AT2G38470,AT2G30250,AT1G53210,AT3G08720,AT1G50460,AT1G65486,AT1G08780,AT1G17870,AT5G67480,AT5G23290,AT5G24660,AT2G19450,AT2G18250,AT2G04240,AT4G25520,AT1G28380,AT1G15690,AT1G60220,AT2G01980,AT1G22882,AT5G12380,AT3G14080,AT5G05300,AT5G59820,AT5G56030…
BP	GO:0080142	regulation of salicylic acid biosynthetic process	FALSE	0.00764596	2.11657	8	1830	6	21925	AT3G09830,AT5G26920,AT3G52430,AT5G03320,AT2G39660,AT1G73805
BP	GO:0009725	response to hormone	FALSE	0.0266286	1.57465	1635	1830	182	21925	AT4G37290,AT4G36900,AT4G36800,AT4G35770,AT4G26610,AT4G15910,AT4G14605,AT3G19290,AT5G05600,AT5G13200,AT5G15970,AT5G52300,AT3G44860,AT1G70670,AT1G74950,AT1G75520,AT1G78240,AT5G26920,AT5G23580,AT5G62880,AT5G08560,AT2G39770,AT2G24850,AT2G24210,AT5G50760,AT3G01090,AT3G04720,AT3G05880,AT3G15500,AT3G21220,AT2G06850,AT2G13790,AT4G24130,AT5G48070,AT4G32040,AT3G63210,AT3G60690,AT3G52430,AT5G36925,AT5G39760…
BP	GO:0032103	positive regulation of response to external stimulus	FALSE	0.0373697	1.42748	104	1830	22	21925	AT3G09830,AT5G13160,AT5G45250,AT5G18610,AT4G12720,AT3G52430,AT2G29460,AT3G09980,AT1G11960,AT5G60410,AT1G18670,AT5G25440,AT3G55150,AT2G22300,AT1G19100,AT1G14370,AT5G03320,AT5G14930,AT3G18690,AT2G39660,AT1G05970,AT1G73805
BP	GO:0002833	positive regulation of response to biotic stimulus	FALSE	0.0373697	1.42748	104	1830	22	21925	AT3G09830,AT5G13160,AT5G45250,AT5G18610,AT4G12720,AT3G52430,AT2G29460,AT3G09980,AT1G11960,AT5G60410,AT1G18670,AT5G25440,AT3G55150,AT2G22300,AT1G19100,AT1G14370,AT5G03320,AT5G14930,AT3G18690,AT2G39660,AT1G05970,AT1G73805

## Sheet: t60_wt_up
Table S7. significants GO items enrichment of differential translation ratios genes.
ONTOLOGY	ID	Description	highlighted	adjusted_p_value	negative_log10_of_adjusted_p_value	term_size	qvalue_size	intersection_size	effective_domain_size	geneID
GO:BP	GO:0050896	response to stimulus	TRUE	0.000146714	3.83353	6001	638	233	21925	AT4G39960,AT4G37290,AT4G35970,AT4G18010,AT4G19690,AT3G47990,AT3G48100,AT1G61890,AT3G20390,AT3G05890,AT5G05600,AT5G12050,AT5G15970,AT5G52300,AT1G70660,AT1G72520,AT1G77600,AT1G80420,AT2G07180,AT5G44910,AT5G45250,AT5G45340,AT2G02390,AT5G48030,AT5G26920,AT5G12080,AT5G59720,AT2G32760,AT2G43350,AT4G07990,AT4G11660,AT3G02140,AT3G19760,AT2G06050,AT2G13790,AT2G16070,AT3G30739,AT4G22780,AT4G31800,AT4G33580…
GO:BP	GO:0009966	regulation of signal transduction	FALSE	0.00876828	2.05709	326	638	25	21925	AT5G05600,AT5G12050,AT5G26920,AT3G02140,AT3G52430,AT3G20810,AT1G52400,AT3G44330,AT1G70700,AT1G72450,AT1G29690,AT4G35020,AT3G17860,AT2G01540,AT3G26000,AT4G06634,AT3G17410,AT5G37740,AT4G37260,AT1G09950,AT1G78570,AT1G18470,AT5G47710,AT4G20380,AT5G18610
GO:BP	GO:0048583	regulation of response to stimulus	FALSE	0.0119491	1.92267	791	638	45	21925	AT5G05600,AT5G12050,AT5G45250,AT5G26920,AT3G02140,AT4G31800,AT3G62600,AT3G52430,AT3G20810,AT1G52400,AT1G11960,AT3G44330,AT5G66210,AT1G70700,AT1G72450,AT1G73805,AT1G29690,AT5G46910,AT1G11310,AT1G02740,AT4G35020,AT4G33730,AT3G17860,AT3G09830,AT2G01540,AT3G26000,AT5G13080,AT4G06634,AT4G01900,AT3G17410,AT4G22140,AT5G37740,AT4G37260,AT2G25930,AT2G42280,AT1G03457,AT1G09950,AT1G78570,AT1G18470,AT5G47710…
GO:BP	GO:0010646	regulation of cell communication	FALSE	0.0119607	1.92224	332	638	25	21925	AT5G05600,AT5G12050,AT5G26920,AT3G02140,AT3G52430,AT3G20810,AT1G52400,AT3G44330,AT1G70700,AT1G72450,AT1G29690,AT4G35020,AT3G17860,AT2G01540,AT3G26000,AT4G06634,AT3G17410,AT5G37740,AT4G37260,AT1G09950,AT1G78570,AT1G18470,AT5G47710,AT4G20380,AT5G18610
GO:BP	GO:0001666	response to hypoxia	TRUE	0.0283389	1.54762	266	638	21	21925	AT5G45340,AT5G26920,AT4G11660,AT3G19760,AT2G13790,AT4G22780,AT3G52430,AT5G41080,AT4G24570,AT5G12020,AT5G47910,AT5G65207,AT1G54050,AT2G46500,AT1G22220,AT3G22550,AT4G20380,AT4G34150,AT4G37710,AT1G63090,AT5G13190
GO:BP	GO:0080142	regulation of salicylic acid biosynthetic process	TRUE	0.0343137	1.46453	8	638	4	21925	AT5G26920,AT3G52430,AT1G73805,AT3G09830
