# Supplementary material for: Integrated transcriptome and translatome analyses reveal the early regulatory network of Brassica napus roots in response to the growth-promoting rhizobacterium Pseudomonas simiae WCS417
Source: Research Square preprint supplement (doi:10.21203/rs.3.rs-7990582/v1), 2025-11-13
Supplement: Supplementary file 6 [file ad05adf54ede3584a9282ac2.xlsx]

## Sheet: N_WCS417_30m-N_Control
Table S. Results of differential translation gene analysis of RNC-seq.
geneid	sampleA	sampleB	baseMeanA	baseMeanB	baseMean	log2FoldChange	lfcSE	stat	pvalue	padj	change	group	Class	Ath	Symbol	Description
BnaA01G0027600ZS	N_WCS417_30m	N_Control	86.982	2.27518	44.6286	5.25851	0.857936	6.12926	8.82906e-10	1.72082e-08	Up	N_WCS417_30m-N_Control	RNC	AT4G35770	SEN1	Senescence-associated gene that is strongly induced by phosphate starvation. Transcripts are differentially regulated at the level of mRNA stability at different times of day. mRNAs are targets of the mRNA degradation pathway mediated by the downstream (DST) instability determinant.
BnaA01G0091600ZS	N_WCS417_30m	N_Control	73.8603	28.5604	51.2104	1.3646	0.508882	2.68156	0.00732791	0.0466689	Up	N_WCS417_30m-N_Control	RNC	AT4G18170	WRKY28	member of WRKY Transcription Factor; Group II-c. Involved in the activation of salicylic acid biosynthesis genes ICS1 and PBS3.
BnaA02G0122400ZS	N_WCS417_30m	N_Control	293.454	9.86152	151.658	4.91863	0.441415	11.1429	7.7582e-29	4.84277e-27	Up	N_WCS417_30m-N_Control	RNC	AT5G56550	OXS3	Encodes OXIDATIVE STRESS 3 (OXS3)&#65292; involved in tolerance to heavy metals and oxidative stress.
BnaA02G0205200ZS	N_WCS417_30m	N_Control	31.7681	1.18026	16.4742	4.79371	1.28325	3.73561	0.000187261	0.00188981	Up	N_WCS417_30m-N_Control	RNC	AT1G73165	CLE1	Member of a large family of putative ligands homologous to the Clavata3 gene. Consists of a single exon. Can replace CLV3 function in vivo.
BnaA04G0246000ZS	N_WCS417_30m	N_Control	23.141	0	11.5705	6.7908	1.72309	3.94105	8.11259e-05	0.000876729	Up	N_WCS417_30m-N_Control	RNC	AT2G38240	JOX4	2-oxoglutarate (2OG) and Fe(II)-dependent oxygenase superfamily protein
BnaA05G0103100ZS	N_WCS417_30m	N_Control	94.6812	3.32742	49.0043	4.80384	0.745529	6.44354	1.16721e-10	2.45592e-09	Up	N_WCS417_30m-N_Control	RNC	AT2G34180	WL2	Encodes CBL-interacting protein kinase 13 (CIPK13).
BnaA06G0081500ZS	N_WCS417_30m	N_Control	95.8555	269.523	182.689	-1.49015	0.256725	-5.80447	6.45712e-09	1.16669e-07	Down	N_WCS417_30m-N_Control	RNC	AT1G12610	DDF1	Encodes a member of the DREB subfamily A-1 of ERF/AP2 transcription factor family (DDF1). The protein contains one AP2 domain. There are six members in this subfamily, including CBF1, CBF2, and CBF3. Overexpression of this gene results in delayed flowering and dwarfism, reduction of gibberellic acid biosynthesis, and increased tolerance to high levels of salt. This gene is expressed in all tissue…
BnaA08G0172700ZS	N_WCS417_30m	N_Control	0.840946	31.8098	16.3254	-5.21303	1.28872	-4.04513	5.22944e-05	0.000588513	Down	N_WCS417_30m-N_Control	RNC	AT4G25470	FTQ4	Encodes a member of the DREB subfamily A-1 of ERF/AP2 transcription factor family (CBF2). The protein contains one AP2 domain. There are six members in this subfamily, including CBF1, CBF2, and CBF3. This gene is involved in response to low temperature, abscisic acid, and circadian rhythm. Overexpressing this gene leads to increased freeze tolerance and induces the expression level of 85 cold-ind…
BnaA09G0084000ZS	N_WCS417_30m	N_Control	21.9666	1.72772	11.8472	3.68142	1.21595	3.0276	0.00246504	0.0185476	Up	N_WCS417_30m-N_Control	RNC	AT5G63450	CYP94B1	member of CYP94B
BnaA10G0089800ZS	N_WCS417_30m	N_Control	24.6419	486.624	255.633	-4.30639	0.276328	-15.5843	9.30548e-55	2.11478e-52	Down	N_WCS417_30m-N_Control	RNC	AT5G51990	DREB1D	encodes a member of the DREB subfamily A-1 of ERF/AP2 transcription factor family (CBF4). The protein contains one AP2 domain. There are six members in this subfamily, including CBF1, CBF2, and CBF3. This gene is involved in response to drought stress and abscisic acid treatment, but not to low temperature.
BnaC02G0205900ZS	N_WCS417_30m	N_Control	383.535	20.8606	202.198	4.20463	0.847781	4.95957	7.06476e-07	1.03357e-05	Up	N_WCS417_30m-N_Control	RNC	AT1G66700	PXMT1	A member of the Arabidopsis SABATH methyltransferase gene family. Encodes PXMT1, a methyltransferase that methylates 1,7-paraxanthine.
BnaC07G0236000ZS	N_WCS417_30m	N_Control	204.841	91.8532	148.347	1.1589	0.282866	4.09698	4.18575e-05	0.000479941	Up	N_WCS417_30m-N_Control	RNC	AT5G45110	NPR3	Encodes NPR3, a paralog of NPR1. Involved in negative regulation of defense responses against bacterial and oomycete pathogens. npr3 mutants has elevated level of PR1 expression. Interacts with TGA2, TGA3, TGA5 and TGA6 in yeast two hybrid assays. NPR3 and NPR4 are receptors for the immune signal salicylic acid.
BnaC08G0165900ZS	N_WCS417_30m	N_Control	1.26142	25.1123	13.1869	-4.29094	1.22238	-3.51031	0.000447593	0.00415846	Down	N_WCS417_30m-N_Control	RNC	AT4G25490	DREB1B	Transcriptional activator that binds to the DRE/CRT regulatory element and induces COR (cold-regulated) gene expression increasing plant freezing tolerance. It encodes a member of the DREB subfamily A-1 of ERF/AP2 transcription factor family (CBF1). The protein contains one AP2 domain. There are six members in this subfamily, including CBF1, CBF2, and CBF3. This gene is involved in response to lo…
BnaC08G0456900ZS	N_WCS417_30m	N_Control	35.2625	0	17.6313	7.39808	1.62738	4.546	5.4676e-06	7.1321e-05	Up	N_WCS417_30m-N_Control	RNC	AT2G20880	ERF53	Encodes ERF53, a drought-induced transcription factor. Belongs to the AP2/ERF superfamily, and has a highly conserved AP2 domain. Regulates drought-responsive gene expressions by binding to the GCC box and/or dehydration-responsive element (DRE) in the promoter of downstream genes. Overexpression of AtERF53 driven by the CaMV35S promoter resulted in an unstable drought-tolerant phenotype in T2 tr…
BnaC09G0267300ZS	N_WCS417_30m	N_Control	128.414	13.8217	71.118	3.22687	0.481661	6.69947	2.09174e-11	4.61483e-10	Up	N_WCS417_30m-N_Control	RNC	AT3G25770	AOC2	Encodes allene oxide cyclase. One of four genes in Arabidopsis that encode this enzyme, which catalyzes an essential step in jasmonic acid biosynthesis. Gene expression is induced during senescence, a process that involves jasmonic acid signalling pathway. Note: Nomenclature for Arabidopsis allene oxide cyclase 2 (AOC2, AT3G25770) gene is based on Stenzel et al. 2003 Plant Molecular Biology 51:89…
BnaA01G0059100ZS	N_WCS417_30m	N_Control	51.9876	161.281	106.635	-1.632	0.332893	-4.90249	9.4628e-07	1.35935e-05	Down	N_WCS417_30m-N_Control	RNC	AT4G31730	GDU1	Glutamine dumper1 is a putative transmembrane protein. It is involved in glutamine secretion
BnaA01G0086300ZS	N_WCS417_30m	N_Control	3492.19	4829.9	4161.04	-0.467787	0.0657953	-7.10974	1.16265e-12	2.77e-11	Normal	N_WCS417_30m-N_Control	RNC	AT4G17500	ERF1A	Encodes a member of the ERF (ethylene response factor) subfamily B-3 of ERF/AP2 transcription factor family (ATERF-1). The protein contains one AP2 domain. There are 18 members in this subfamily including ATERF-1, ATERF-2, AND ATERF-5.
BnaA02G0403400ZS	N_WCS417_30m	N_Control	71.7212	47.2739	59.4976	0.603095	0.43731	1.3791	0.167864	0.456404	Normal	N_WCS417_30m-N_Control	RNC	AT5G63450	CYP94B1	member of CYP94B
BnaA03G0115600ZS	N_WCS417_30m	N_Control	82.1609	9.18605	45.6735	3.16988	0.58738	5.39664	6.79004e-08	1.11303e-06	Up	N_WCS417_30m-N_Control	RNC	AT5G56550	OXS3	Encodes OXIDATIVE STRESS 3 (OXS3)&#65292; involved in tolerance to heavy metals and oxidative stress.
BnaA04G0120500ZS	N_WCS417_30m	N_Control	1056.7	594.773	825.738	0.829069	0.125228	6.62048	3.58034e-11	7.73857e-10	Normal	N_WCS417_30m-N_Control	RNC	AT5G40780	LHT1	Encodes LHT1 (lysine histidine transporter), a high-affinity transporter for cellular amino acid uptake in both root epidermis and leaf mesophyll.
BnaA04G0219900ZS	N_WCS417_30m	N_Control	88.3088	11.4612	49.885	2.95269	0.545151	5.41628	6.0853e-08	1.00243e-06	Up	N_WCS417_30m-N_Control	RNC	AT2G34180	WL2	Encodes CBL-interacting protein kinase 13 (CIPK13).
BnaA05G0084400ZS	N_WCS417_30m	N_Control	14.6226	1.09492	7.85878	3.70543	1.51922	2.43904	0.0147263	0.0822606	Normal	N_WCS417_30m-N_Control	RNC	AT2G36690	GIM2	2-oxoglutarate (2OG) and Fe(II)-dependent oxygenase superfamily protein
BnaA06G0393700ZS	N_WCS417_30m	N_Control	60.8324	3.41276	32.1226	4.15716	0.800416	5.19375	2.061e-07	3.20984e-06	Up	N_WCS417_30m-N_Control	RNC	AT3G25770	AOC2	Encodes allene oxide cyclase. One of four genes in Arabidopsis that encode this enzyme, which catalyzes an essential step in jasmonic acid biosynthesis. Gene expression is induced during senescence, a process that involves jasmonic acid signalling pathway. Note: Nomenclature for Arabidopsis allene oxide cyclase 2 (AOC2, AT3G25770) gene is based on Stenzel et al. 2003 Plant Molecular Biology 51:89…
BnaA06G0431800ZS	N_WCS417_30m	N_Control	217.818	103.933	160.876	1.06496	0.28192	3.77752	0.0001584	0.00162232	Up	N_WCS417_30m-N_Control	RNC	AT5G45110	NPR3	Encodes NPR3, a paralog of NPR1. Involved in negative regulation of defense responses against bacterial and oomycete pathogens. npr3 mutants has elevated level of PR1 expression. Interacts with TGA2, TGA3, TGA5 and TGA6 in yeast two hybrid assays. NPR3 and NPR4 are receptors for the immune signal salicylic acid.
BnaA08G0172600ZS	N_WCS417_30m	N_Control	3.07394	20.6046	11.8393	-2.75438	1.09393	-2.51788	0.0118063	0.0689536	Normal	N_WCS417_30m-N_Control	RNC	AT4G25470	FTQ4	Encodes a member of the DREB subfamily A-1 of ERF/AP2 transcription factor family (CBF2). The protein contains one AP2 domain. There are six members in this subfamily, including CBF1, CBF2, and CBF3. This gene is involved in response to low temperature, abscisic acid, and circadian rhythm. Overexpressing this gene leads to increased freeze tolerance and induces the expression level of 85 cold-ind…
BnaA08G0213800ZS	N_WCS417_30m	N_Control	30.1733	124.886	77.5296	-2.04842	0.394553	-5.19175	2.08325e-07	3.24233e-06	Down	N_WCS417_30m-N_Control	RNC	AT1G28360	ERF12	encodes a member of the ERF (ethylene response factor) subfamily B-1 of ERF/AP2 transcription factor family (ERF12). The protein contains one AP2 domain. There are 15 members in this subfamily including ATERF-3, ATERF-4, ATERF-7, and leafy petiole.
BnaA08G0261700ZS	N_WCS417_30m	N_Control	69.9236	28.9872	49.4554	1.27044	0.47803	2.65766	0.00786848	0.0494656	Up	N_WCS417_30m-N_Control	RNC	AT1G17420	LOX3	LOX3 encode a Lipoxygenase. Lipoxygenases (LOXs) catalyze the oxygenation of fatty acids (FAs).
BnaA08G0278200ZS	N_WCS417_30m	N_Control	36.4083	58.1804	47.2944	-0.679139	0.497271	-1.36573	0.172023	0.463267	Normal	N_WCS417_30m-N_Control	RNC	AT1G12610	DDF1	Encodes a member of the DREB subfamily A-1 of ERF/AP2 transcription factor family (DDF1). The protein contains one AP2 domain. There are six members in this subfamily, including CBF1, CBF2, and CBF3. Overexpression of this gene results in delayed flowering and dwarfism, reduction of gibberellic acid biosynthesis, and increased tolerance to high levels of salt. This gene is expressed in all tissue…
BnaA09G0038700ZS	N_WCS417_30m	N_Control	30.4346	41.1665	35.8006	-0.436269	0.585874	-0.744647	0.456485	0.759144	Normal	N_WCS417_30m-N_Control	RNC	AT5G40780	LHT1	Encodes LHT1 (lysine histidine transporter), a high-affinity transporter for cellular amino acid uptake in both root epidermis and leaf mesophyll.
BnaC01G0070900ZS	N_WCS417_30m	N_Control	90.2084	356.086	223.147	-1.98209	0.238427	-8.3132	9.31587e-17	2.92509e-15	Down	N_WCS417_30m-N_Control	RNC	AT4G31730	GDU1	Glutamine dumper1 is a putative transmembrane protein. It is involved in glutamine secretion
BnaC01G0111600ZS	N_WCS417_30m	N_Control	34.6175	10.8284	22.723	1.6778	0.722015	2.32377	0.0201377	0.105514	Normal	N_WCS417_30m-N_Control	RNC	AT4G18170	WRKY28	member of WRKY Transcription Factor; Group II-c. Involved in the activation of salicylic acid biosynthesis genes ICS1 and PBS3.
BnaC02G0206000ZS	N_WCS417_30m	N_Control	524.706	68.2272	296.467	2.94499	0.669521	4.39865	1.08926e-05	0.000136715	Up	N_WCS417_30m-N_Control	RNC	AT1G66700	PXMT1	A member of the Arabidopsis SABATH methyltransferase gene family. Encodes PXMT1, a methyltransferase that methylates 1,7-paraxanthine.
BnaC02G0206100ZS	N_WCS417_30m	N_Control	678.654	113.553	396.103	2.58225	0.194124	13.3021	2.25074e-40	2.36257e-38	Up	N_WCS417_30m-N_Control	RNC	AT1G66700	PXMT1	A member of the Arabidopsis SABATH methyltransferase gene family. Encodes PXMT1, a methyltransferase that methylates 1,7-paraxanthine.
BnaC02G0206200ZS	N_WCS417_30m	N_Control	137.041	18.955	77.9982	2.84169	0.465416	6.1057	1.02353e-09	1.98664e-08	Up	N_WCS417_30m-N_Control	RNC	AT1G66700	PXMT1	A member of the Arabidopsis SABATH methyltransferase gene family. Encodes PXMT1, a methyltransferase that methylates 1,7-paraxanthine.
BnaC02G0238700ZS	N_WCS417_30m	N_Control	18.5593	6.36341	12.4614	1.55294	0.984353	1.57762	0.114652	0.363581	Normal	N_WCS417_30m-N_Control	RNC	AT1G69530	EXPA1	Member of Alpha-Expansin Gene Family. Naming convention from the Expansin Working Group (Kende et al, Plant Mol Bio). Involved in the formation of nematode-induced syncytia in roots of Arabidopsis thaliana.
BnaC02G0250300ZS	N_WCS417_30m	N_Control	25.0841	21.3654	23.2248	0.235689	0.722065	0.32641	0.744114	0.917201	Normal	N_WCS417_30m-N_Control	RNC	AT1G70560	WEI8	TAA1 is involved in the shade-induced production of indole-3-pyruvate (IPA), a precursor to IAA, a biologically active auxin. It is also involved in regulating many aspects of plant growth and development from embryogenesis to flower formation and plays a role in ethylene-mediated signaling. This enzyme can catalyze the formation of IPA from L-tryptophan. Though L-Trp is expected to be the prefer…
BnaC02G0267900ZS	N_WCS417_30m	N_Control	252.552	536.302	394.427	-1.08689	0.173227	-6.27439	3.51e-10	7.09516e-09	Down	N_WCS417_30m-N_Control	RNC	AT1G72520	LOX4	PLAT/LH2 domain-containing lipoxygenase family protein
BnaC02G0273400ZS	N_WCS417_30m	N_Control	32.2322	3.41276	17.8225	3.24112	0.932877	3.47433	0.000512134	0.00469227	Up	N_WCS417_30m-N_Control	RNC	AT1G73165	CLE1	Member of a large family of putative ligands homologous to the Clavata3 gene. Consists of a single exon. Can replace CLV3 function in vivo.
BnaC02G0439300ZS	N_WCS417_30m	N_Control	22.7423	16.4737	19.608	0.466264	0.74345	0.627163	0.530552	0.807587	Normal	N_WCS417_30m-N_Control	RNC	AT2G03090	EXPA15	member of Alpha-Expansin Gene Family. Naming convention from the Expansin Working Group (Kende et al, 2004. Plant Mol Bio). Involved in the formation of nematode-induced syncytia in roots of Arabidopsis thaliana.
BnaC02G0481600ZS	N_WCS417_30m	N_Control	57.7803	71.9241	64.8522	-0.314585	0.412184	-0.763215	0.445335	0.751444	Normal	N_WCS417_30m-N_Control	RNC	AT3G30725	GDU6	Encodes a member of the GDU (glutamine dumper) family proteins involved in amino acid export: At4g31730 (GDU1), At4g25760 (GDU2), At5g57685 (GDU3), At2g24762 (GDU4), At5g24920 (GDU5), At3g30725 (GDU6) and At5g38770 (GDU7).
BnaC02G0536400ZS	N_WCS417_30m	N_Control	238.139	107.737	172.938	1.14597	0.262146	4.37151	1.23392e-05	0.000153636	Up	N_WCS417_30m-N_Control	RNC	AT5G63450	CYP94B1	member of CYP94B
BnaC03G0134000ZS	N_WCS417_30m	N_Control	153.52	17.2345	85.3773	3.16397	0.434539	7.28122	3.30822e-13	8.21197e-12	Up	N_WCS417_30m-N_Control	RNC	AT5G56550	OXS3	Encodes OXIDATIVE STRESS 3 (OXS3)&#65292; involved in tolerance to heavy metals and oxidative stress.
BnaC03G0543200ZS	N_WCS417_30m	N_Control	77.7316	6.99621	42.3639	3.49509	0.662938	5.27213	1.34853e-07	2.14227e-06	Up	N_WCS417_30m-N_Control	RNC	AT5G63450	CYP94B1	member of CYP94B
BnaC04G0601900ZS	N_WCS417_30m	N_Control	154.071	423.127	288.599	-1.45673	0.226166	-6.44097	1.18713e-10	2.49559e-09	Down	N_WCS417_30m-N_Control	RNC	AT2G44840	ERF13	encodes a member of the ERF (ethylene response factor) subfamily B-3 of ERF/AP2 transcription factor family. The protein contains one AP2 domain. There are 18 members in this subfamily including ATERF-1, ATERF-2, AND ATERF-5.
BnaC05G0219000ZS	N_WCS417_30m	N_Control	117.735	32.862	75.2985	1.84024	0.408206	4.50812	6.54034e-06	8.45369e-05	Up	N_WCS417_30m-N_Control	RNC	AT1G26770	EXPA10	Encodes an expansin. Naming convention from the Expansin Working Group (Kende et al, Plant Mol Bio). Involved in the formation of nematode-induced syncytia in roots of Arabidopsis thaliana.
BnaC06G0386800ZS	N_WCS417_30m	N_Control	41.3669	150.78	96.0734	-1.86685	0.359183	-5.19749	2.01996e-07	3.14906e-06	Down	N_WCS417_30m-N_Control	RNC	AT1G19610	PDF1.4	Predicted to encode a PR (pathogenesis-related) protein. Belongs to the plant defensin (PDF) family with the following members: At1g75830/PDF1.1, At5g44420/PDF1.2a, At2g26020/PDF1.2b, At5g44430/PDF1.2c, At2g26010/PDF1.3, At1g19610/PDF1.4, At1g55010/PDF1.5, At2g02120/PDF2.1, At2g02100/PDF2.2, At2g02130/PDF2.3, At1g61070/PDF2.4, At5g63660/PDF2.5, At2g02140/PDF2.6, At5g38330/PDF3.1 and At4g30070/PDF…
BnaC08G0218200ZS	N_WCS417_30m	N_Control	108.768	101.331	105.049	0.102591	0.322887	0.31773	0.750689	0.920356	Normal	N_WCS417_30m-N_Control	RNC	AT1G12610	DDF1	Encodes a member of the DREB subfamily A-1 of ERF/AP2 transcription factor family (DDF1). The protein contains one AP2 domain. There are six members in this subfamily, including CBF1, CBF2, and CBF3. Overexpression of this gene results in delayed flowering and dwarfism, reduction of gibberellic acid biosynthesis, and increased tolerance to high levels of salt. This gene is expressed in all tissue…
BnaC08G0240500ZS	N_WCS417_30m	N_Control	69.2637	41.2873	55.2755	0.745194	0.450147	1.65545	0.0978342	0.327766	Normal	N_WCS417_30m-N_Control	RNC	AT1G17420	LOX3	LOX3 encode a Lipoxygenase. Lipoxygenases (LOXs) catalyze the oxygenation of fatty acids (FAs).
BnaC08G0344700ZS	N_WCS417_30m	N_Control	243.561	33.4095	138.485	2.86395	0.326575	8.76966	1.79214e-18	6.3417e-17	Up	N_WCS417_30m-N_Control	RNC	AT3G54420	EP3	encodes an EP3 chitinase that is expressed during somatic embryogenesis in 'nursing' cells surrounding the embryos but not in embryos themselves. The gene is also expressed in mature pollen and growing pollen tubes until they enter the receptive synergid, but not in endosperm and integuments as in carrot. Post-embryonically, expression is found in hydathodes, stipules, root epidermis and emerging…
BnaC08G0345100ZS	N_WCS417_30m	N_Control	837.545	202.704	520.124	2.04826	0.163529	12.5254	5.42482e-36	4.69443e-34	Up	N_WCS417_30m-N_Control	RNC	AT3G54420	EP3	encodes an EP3 chitinase that is expressed during somatic embryogenesis in 'nursing' cells surrounding the embryos but not in embryos themselves. The gene is also expressed in mature pollen and growing pollen tubes until they enter the receptive synergid, but not in endosperm and integuments as in carrot. Post-embryonically, expression is found in hydathodes, stipules, root epidermis and emerging…
BnaC08G0473100ZS	N_WCS417_30m	N_Control	24.1125	13.2743	18.6934	0.867387	0.79344	1.0932	0.274307	0.596163	Normal	N_WCS417_30m-N_Control	RNC	AT1G17420	LOX3	LOX3 encode a Lipoxygenase. Lipoxygenases (LOXs) catalyze the oxygenation of fatty acids (FAs).
BnaC09G0077800ZS	N_WCS417_30m	N_Control	23.8009	7.03889	15.4199	1.77126	0.984779	1.79863	0.0720769	0.267615	Normal	N_WCS417_30m-N_Control	RNC	AT5G63450	CYP94B1	member of CYP94B
BnaC09G0208800ZS	N_WCS417_30m	N_Control	56.591	27.0461	41.8185	1.06295	0.541949	1.96135	0.0498381	0.207896	Normal	N_WCS417_30m-N_Control	RNC	AT5G43360	PHT3	Encodes Pht1;3, a member of the Pht1 family of phosphate transporters which include: Pht1;1/At5g43350, Pht1;2/At5g43370, Pht1;3/At5g43360, Pht1;4/At2g38940, Pht1;5/At2g32830, Pht1;6/At5g43340, Pht1;7/At3g54700, Pht1;8/At1g20860, Pht1;9/At1g76430 (Plant Journal 2002, 31:341).
BnaC09G0341300ZS	N_WCS417_30m	N_Control	20.3065	117.072	68.6891	-2.53014	0.452768	-5.58815	2.29498e-08	3.94282e-07	Down	N_WCS417_30m-N_Control	RNC	AT5G51990	DREB1D	encodes a member of the DREB subfamily A-1 of ERF/AP2 transcription factor family (CBF4). The protein contains one AP2 domain. There are six members in this subfamily, including CBF1, CBF2, and CBF3. This gene is involved in response to drought stress and abscisic acid treatment, but not to low temperature.
Bnascaffold0027G0038900ZS	N_WCS417_30m	N_Control	23.1845	16.4737	19.8291	0.493924	0.738053	0.669225	0.503352	0.79146	Normal	N_WCS417_30m-N_Control	RNC	AT2G03090	EXPA15	member of Alpha-Expansin Gene Family. Naming convention from the Expansin Working Group (Kende et al, 2004. Plant Mol Bio). Involved in the formation of nematode-induced syncytia in roots of Arabidopsis thaliana.
BnaC01G0213100ZS	N_WCS417_30m	N_Control	1511.99	6855	4183.5	-2.18029	0.0724838	-30.0797	8.9389e-199	4.18484e-194	Down	N_WCS417_30m-N_Control	RNC	AT4G27280	CMI1	Calcium-binding EF-hand family protein
BnaA05G0399100ZS	N_WCS417_30m	N_Control	7041.35	1752.15	4396.75	2.00667	0.0671424	29.8868	2.92436e-196	6.84535e-192	Up	N_WCS417_30m-N_Control	RNC	AT3G15450	--	Aluminium induced protein with YGL and LRDR motifs
BnaC05G0447600ZS	N_WCS417_30m	N_Control	7914.21	1986.26	4950.24	1.99474	0.0671442	29.7083	5.9979e-194	9.35992e-190	Up	N_WCS417_30m-N_Control	RNC	AT3G15450	--	Aluminium induced protein with YGL and LRDR motifs
BnaC03G0167800ZS	N_WCS417_30m	N_Control	265.471	2343.66	1304.56	-3.14309	0.1138	-27.6194	6.50728e-168	7.61612e-164	Down	N_WCS417_30m-N_Control	RNC	AT2G30020	AP2C1	Encodes AP2C1. Belongs to the clade B of the PP2C-superfamily. Acts as a MAPK phosphatase that negatively regulates MPK4 and MPK6.
BnaC02G0109300ZS	N_WCS417_30m	N_Control	1133.26	4626.69	2879.98	-2.02964	0.075727	-26.8021	3.05369e-158	2.85923e-154	Down	N_WCS417_30m-N_Control	RNC	AT5G22250	CAF1b	Encodes one of the homologs of the yeast CCR4-associated factor 1: AT3G44260 (CAF1a), AT5G22250 (CAF1b). Has mRNA deadenylation activity. Also plays a role in plant defense responses.
BnaC03G0229200ZS	N_WCS417_30m	N_Control	1496	5697.8	3596.9	-1.92926	0.072153	-26.7385	1.68006e-157	1.3109e-153	Down	N_WCS417_30m-N_Control	RNC	AT2G40000	HSPRO2	ortholog of sugar beet HS1 PRO-1 2
BnaA01G0165800ZS	N_WCS417_30m	N_Control	1091.45	4617.18	2854.31	-2.08112	0.0780085	-26.6781	8.45443e-157	5.65432e-153	Down	N_WCS417_30m-N_Control	RNC	AT4G27270	--	Quinone reductase family protein
BnaA01G0348500ZS	N_WCS417_30m	N_Control	1396.13	74.2347	735.182	4.23085	0.175155	24.1548	6.64228e-129	3.88707e-125	Up	N_WCS417_30m-N_Control	RNC	AT3G15450	--	Aluminium induced protein with YGL and LRDR motifs
BnaA05G0136300ZS	N_WCS417_30m	N_Control	336.14	2181.69	1258.92	-2.69744	0.11214	-24.0542	7.53963e-128	3.92195e-124	Down	N_WCS417_30m-N_Control	RNC	AT2G30020	AP2C1	Encodes AP2C1. Belongs to the clade B of the PP2C-superfamily. Acts as a MAPK phosphatase that negatively regulates MPK4 and MPK6.
BnaC07G0549400ZS	N_WCS417_30m	N_Control	2692.45	503.696	1598.07	2.41873	0.100644	24.0325	1.27345e-127	5.96176e-124	Up	N_WCS417_30m-N_Control	RNC	AT3G45970	EXPL1	member of EXPANSIN-LIKE. Naming convention from the Expansin Working Group (Kende et al, 2004. Plant Mol Bio)
BnaC09G0449600ZS	N_WCS417_30m	N_Control	382.299	2169.73	1276.01	-2.5046	0.106638	-23.487	5.54409e-122	2.35957e-118	Down	N_WCS417_30m-N_Control	RNC	AT5G22250	CAF1b	Encodes one of the homologs of the yeast CCR4-associated factor 1: AT3G44260 (CAF1a), AT5G22250 (CAF1b). Has mRNA deadenylation activity. Also plays a role in plant defense responses.
BnaC09G0491300ZS	N_WCS417_30m	N_Control	1033.77	3727.68	2380.72	-1.8504	0.0802705	-23.0521	1.40199e-117	5.46964e-114	Down	N_WCS417_30m-N_Control	RNC	AT5G17350	--	--
BnaA01G0075800ZS	N_WCS417_30m	N_Control	714.017	3023.61	1868.81	-2.08186	0.0912068	-22.8257	2.54664e-115	9.17104e-112	Down	N_WCS417_30m-N_Control	RNC	AT4G29780	--	--
BnaC05G0398400ZS	N_WCS417_30m	N_Control	288.017	1821.24	1054.63	-2.66083	0.116978	-22.7465	1.55493e-114	5.1997e-111	Down	N_WCS417_30m-N_Control	RNC	AT3G19595	--	Haloacid dehalogenase-like hydrolase (HAD) superfamily protein
BnaA04G0237600ZS	N_WCS417_30m	N_Control	4846.47	1406.36	3126.42	1.7857	0.0791586	22.5586	1.10692e-112	3.45476e-109	Up	N_WCS417_30m-N_Control	RNC	AT2G37040	PAL1	Encodes PAL1, a phenylalanine ammonia-lyase. Arabidopsis has four PALs: AT2G37040 (PAL1), AT3G53260 (PAL2), AT5G04230 (PAL3) and AT3G10340 (PAL4).
BnaA03G0144500ZS	N_WCS417_30m	N_Control	299.899	1868.05	1083.97	-2.63851	0.118139	-22.3339	1.72953e-110	5.06061e-107	Down	N_WCS417_30m-N_Control	RNC	AT2G30020	AP2C1	Encodes AP2C1. Belongs to the clade B of the PP2C-superfamily. Acts as a MAPK phosphatase that negatively regulates MPK4 and MPK6.
BnaA03G0195500ZS	N_WCS417_30m	N_Control	2816.99	7260.97	5038.98	-1.36603	0.0617747	-22.1132	2.36182e-108	6.50418e-105	Down	N_WCS417_30m-N_Control	RNC	AT2G40000	HSPRO2	ortholog of sugar beet HS1 PRO-1 2
BnaA09G0610100ZS	N_WCS417_30m	N_Control	46.3404	1017.71	532.028	-4.46113	0.203448	-21.9276	1.41735e-106	3.68637e-103	Down	N_WCS417_30m-N_Control	RNC	AT1G19210	ERF17	encodes a member of the DREB subfamily A-5 of ERF/AP2 transcription factor family. The protein contains one AP2 domain. There are 15 members in this subfamily including RAP2.1, RAP2.9 and RAP2.10.
BnaC04G0553100ZS	N_WCS417_30m	N_Control	4930.11	1532.3	3231.2	1.68647	0.0775101	21.7581	5.79139e-105	1.427e-101	Up	N_WCS417_30m-N_Control	RNC	AT2G37040	PAL1	Encodes PAL1, a phenylalanine ammonia-lyase. Arabidopsis has four PALs: AT2G37040 (PAL1), AT3G53260 (PAL2), AT5G04230 (PAL3) and AT3G10340 (PAL4).
BnaC01G0089700ZS	N_WCS417_30m	N_Control	926.732	3355.22	2140.98	-1.85652	0.0854487	-21.7267	1.14647e-104	2.68365e-101	Down	N_WCS417_30m-N_Control	RNC	AT4G29780	--	--
BnaA09G0428500ZS	N_WCS417_30m	N_Control	2579.16	7136.29	4857.72	-1.4684	0.0679146	-21.6212	1.13393e-103	2.52791e-100	Down	N_WCS417_30m-N_Control	RNC	AT1G27730	ZAT10	Related to Cys2/His2-type zinc-finger proteins found in higher plants. Compensated for a subset of calcineurin deficiency in yeast. Salt tolerance produced by ZAT10 appeared to be partially dependent on ENA1/PMR2, a P-type ATPase required for Li+ and Na+ efflux in yeast. The protein is localized to the nucleus, acts as a transcriptional repressor and is responsive to chitin oligomers. Also involv…
BnaA04G0272000ZS	N_WCS417_30m	N_Control	370.083	2197.25	1283.67	-2.56844	0.119729	-21.4522	4.35416e-102	9.26566e-99	Down	N_WCS417_30m-N_Control	RNC	AT2G42760	--	--
BnaA09G0494800ZS	N_WCS417_30m	N_Control	4215.52	1291.61	2753.57	1.70659	0.0811453	21.0313	3.39123e-98	6.90277e-95	Up	N_WCS417_30m-N_Control	RNC	AT3G53260	PAL2	Encodes phenylalanine lyase. Arabidopsis has four PALs: AT2G37040 (PAL1), AT3G53260 (PAL2), AT5G04230 (PAL3) and AT3G10340 (PAL4).
BnaC04G0337700ZS	N_WCS417_30m	N_Control	3220.09	855.474	2037.78	1.91318	0.0909852	21.0274	3.6849e-98	7.18801e-95	Up	N_WCS417_30m-N_Control	RNC	AT3G53260	PAL2	Encodes phenylalanine lyase. Arabidopsis has four PALs: AT2G37040 (PAL1), AT3G53260 (PAL2), AT5G04230 (PAL3) and AT3G10340 (PAL4).
BnaA02G0090700ZS	N_WCS417_30m	N_Control	850.609	3036.1	1943.36	-1.83543	0.0873616	-21.0096	5.36128e-98	1.00398e-94	Down	N_WCS417_30m-N_Control	RNC	AT5G22250	CAF1b	Encodes one of the homologs of the yeast CCR4-associated factor 1: AT3G44260 (CAF1a), AT5G22250 (CAF1b). Has mRNA deadenylation activity. Also plays a role in plant defense responses.
BnaA03G0512700ZS	N_WCS417_30m	N_Control	236.008	1515.03	875.52	-2.68291	0.128047	-20.9526	1.77536e-97	3.19675e-94	Down	N_WCS417_30m-N_Control	RNC	AT4G29780	--	--
BnaC04G0589600ZS	N_WCS417_30m	N_Control	647.545	2591.19	1619.37	-2.00076	0.0956698	-20.9131	4.06597e-97	7.0501e-94	Down	N_WCS417_30m-N_Control	RNC	AT2G42760	--	--
BnaA08G0154900ZS	N_WCS417_30m	N_Control	10892.7	4875.76	7884.22	1.15973	0.0556369	20.8447	1.70314e-96	2.84765e-93	Up	N_WCS417_30m-N_Control	RNC	AT4G30530	GGP1	Encodes a gamma-glutamyl peptidase, outside the GGT family, that can hydrolyze gamma-glutamyl peptide bonds.
BnaA07G0010200ZS	N_WCS417_30m	N_Control	6167.93	13536.7	9852.29	-1.13397	0.0544397	-20.8298	2.32476e-96	3.75296e-93	Down	N_WCS417_30m-N_Control	RNC	AT2G19590	ATACO1	encodes a protein whose sequence is similar to 1-aminocyclopropane-1-carboxylate oxidase
BnaA10G0165800ZS	N_WCS417_30m	N_Control	311.665	1811.74	1061.7	-2.53893	0.122131	-20.7885	5.49693e-96	8.57815e-93	Down	N_WCS417_30m-N_Control	RNC	AT5G22250	CAF1b	Encodes one of the homologs of the yeast CCR4-associated factor 1: AT3G44260 (CAF1a), AT5G22250 (CAF1b). Has mRNA deadenylation activity. Also plays a role in plant defense responses.
BnaC04G0334700ZS	N_WCS417_30m	N_Control	3110.32	836.554	1973.44	1.89534	0.0914102	20.7345	1.69361e-95	2.55767e-92	Up	N_WCS417_30m-N_Control	RNC	AT3G53260	PAL2	Encodes phenylalanine lyase. Arabidopsis has four PALs: AT2G37040 (PAL1), AT3G53260 (PAL2), AT5G04230 (PAL3) and AT3G10340 (PAL4).
BnaA10G0168100ZS	N_WCS417_30m	N_Control	2931.6	750.879	1841.24	1.9649	0.0948589	20.714	2.5912e-95	3.79093e-92	Up	N_WCS417_30m-N_Control	RNC	AT5G21940	--	--
BnaA09G0365900ZS	N_WCS417_30m	N_Control	21527.9	41563.5	31545.7	-0.94908	0.0461156	-20.5805	4.10738e-94	5.827e-91	Normal	N_WCS417_30m-N_Control	RNC	--	--	--
BnaA07G0010300ZS	N_WCS417_30m	N_Control	6016.55	13132.7	9574.65	-1.12611	0.05483	-20.5381	9.82829e-94	1.3533e-90	Down	N_WCS417_30m-N_Control	RNC	AT2G19590	ATACO1	encodes a protein whose sequence is similar to 1-aminocyclopropane-1-carboxylate oxidase
BnaA05G0221500ZS	N_WCS417_30m	N_Control	21535.1	41627.9	31581.5	-0.95089	0.046794	-20.3208	8.42435e-92	1.12684e-88	Normal	N_WCS417_30m-N_Control	RNC	--	--	--
BnaC03G0401600ZS	N_WCS417_30m	N_Control	1862.95	370.59	1116.77	2.32919	0.114934	20.2655	2.59359e-91	3.37281e-88	Up	N_WCS417_30m-N_Control	RNC	AT3G13650	--	Disease resistance-responsive (dirigent-like protein) family protein
BnaA05G0242600ZS	N_WCS417_30m	N_Control	7132.03	14623.5	10877.7	-1.03588	0.0512667	-20.2057	8.72026e-91	1.10066e-87	Down	N_WCS417_30m-N_Control	RNC	--	--	--
BnaA03G0334600ZS	N_WCS417_30m	N_Control	2113.74	391.472	1252.61	2.43069	0.120304	20.2045	8.93395e-91	1.10066e-87	Up	N_WCS417_30m-N_Control	RNC	AT3G13650	--	Disease resistance-responsive (dirigent-like protein) family protein
BnaC05G0238200ZS	N_WCS417_30m	N_Control	2424.47	6380.21	4402.34	-1.39595	0.0695965	-20.0577	1.72827e-89	2.07464e-86	Down	N_WCS417_30m-N_Control	RNC	AT1G27730	ZAT10	Related to Cys2/His2-type zinc-finger proteins found in higher plants. Compensated for a subset of calcineurin deficiency in yeast. Salt tolerance produced by ZAT10 appeared to be partially dependent on ENA1/PMR2, a P-type ATPase required for Li+ and Na+ efflux in yeast. The protein is localized to the nucleus, acts as a transcriptional repressor and is responsive to chitin oligomers. Also involv…
BnaA09G0366300ZS	N_WCS417_30m	N_Control	18378.5	34710.8	26544.7	-0.917343	0.0459588	-19.9601	1.22417e-88	1.43277e-85	Normal	N_WCS417_30m-N_Control	RNC	--	--	--
BnaA09G0346000ZS	N_WCS417_30m	N_Control	14849.5	29187.6	22018.5	-0.974907	0.0490766	-19.865	8.17501e-88	9.33466e-85	Normal	N_WCS417_30m-N_Control	RNC	--	--	--
BnaA05G0242400ZS	N_WCS417_30m	N_Control	12650.3	24152.6	18401.4	-0.932978	0.0475113	-19.637	7.47214e-86	8.32895e-83	Normal	N_WCS417_30m-N_Control	RNC	--	--	--
BnaA08G0269200ZS	N_WCS417_30m	N_Control	1839.06	345.386	1092.22	2.41104	0.122801	19.6337	7.96422e-86	8.671e-83	Up	N_WCS417_30m-N_Control	RNC	AT1G15210	PDR7	pleiotropic drug resistance 7
BnaA05G0247900ZS	N_WCS417_30m	N_Control	9169.04	18164.6	13666.8	-0.986297	0.0502914	-19.6116	1.22999e-85	1.30871e-82	Normal	N_WCS417_30m-N_Control	RNC	--	--	--
BnaA08G0218200ZS	N_WCS417_30m	N_Control	2053.25	5274.68	3663.96	-1.36127	0.0700133	-19.4429	3.3439e-84	3.47884e-81	Down	N_WCS417_30m-N_Control	RNC	AT1G27730	ZAT10	Related to Cys2/His2-type zinc-finger proteins found in higher plants. Compensated for a subset of calcineurin deficiency in yeast. Salt tolerance produced by ZAT10 appeared to be partially dependent on ENA1/PMR2, a P-type ATPase required for Li+ and Na+ efflux in yeast. The protein is localized to the nucleus, acts as a transcriptional repressor and is responsive to chitin oligomers. Also involv…
BnaA05G0171400ZS	N_WCS417_30m	N_Control	3736.57	1227.88	2482.22	1.60609	0.0827555	19.4076	6.65255e-84	6.77056e-81	Up	N_WCS417_30m-N_Control	RNC	AT1G51680	AT4CL1	encodes an isoform of 4-coumarate:CoA ligase (4CL), which is involved in the last step of the general phenylpropanoid pathway. In addition to 4-coumarate, it also converts ferulate. The catalytic efficiency was in the following (descending) order: p-coumaric acid, ferulic acid, caffeic acid and 5-OH-ferulic acid. At4CL1 was unable to use sinapic acid as substrate.
BnaA09G0461900ZS	N_WCS417_30m	N_Control	4321.21	1480.16	2900.69	1.54583	0.0797346	19.3872	9.90505e-84	9.86628e-81	Up	N_WCS417_30m-N_Control	RNC	AT1G22410	--	Class-II DAHP synthetase family protein
BnaC08G0333400ZS	N_WCS417_30m	N_Control	4572.43	1692.57	3132.5	1.43367	0.0739735	19.3809	1.11973e-83	1.09211e-80	Up	N_WCS417_30m-N_Control	RNC	AT3G53260	PAL2	Encodes phenylalanine lyase. Arabidopsis has four PALs: AT2G37040 (PAL1), AT3G53260 (PAL2), AT5G04230 (PAL3) and AT3G10340 (PAL4).
BnaC06G0444600ZS	N_WCS417_30m	N_Control	6196.28	2487.78	4342.03	1.31692	0.0681161	19.3335	2.80811e-83	2.68295e-80	Up	N_WCS417_30m-N_Control	RNC	AT1G78830	MNB1	Curculin-like (mannose-binding) lectin family protein
BnaC07G0148900ZS	N_WCS417_30m	N_Control	390.035	1774.99	1082.51	-2.18647	0.113512	-19.2621	1.11782e-82	1.04664e-79	Down	N_WCS417_30m-N_Control	RNC	AT1G27730	ZAT10	Related to Cys2/His2-type zinc-finger proteins found in higher plants. Compensated for a subset of calcineurin deficiency in yeast. Salt tolerance produced by ZAT10 appeared to be partially dependent on ENA1/PMR2, a P-type ATPase required for Li+ and Na+ efflux in yeast. The protein is localized to the nucleus, acts as a transcriptional repressor and is responsive to chitin oligomers. Also involv…
BnaA05G0434300ZS	N_WCS417_30m	N_Control	664.654	2398.1	1531.38	-1.85105	0.0961575	-19.2502	1.40701e-82	1.29158e-79	Down	N_WCS417_30m-N_Control	RNC	AT3G11410	PP2CA	Encodes protein phosphatase 2C. Negative regulator of ABA signalling. Expressed in seeds during germination. mRNA up-regulated by drought and ABA.
BnaA09G0345300ZS	N_WCS417_30m	N_Control	15198.9	28526	21862.5	-0.908265	0.0472932	-19.205	3.3609e-82	3.02585e-79	Normal	N_WCS417_30m-N_Control	RNC	--	--	--
BnaC09G0211400ZS	N_WCS417_30m	N_Control	657.259	2503.99	1580.62	-1.929	0.10082	-19.1332	1.33656e-81	1.18061e-78	Down	N_WCS417_30m-N_Control	RNC	AT5G42380	CML37	calmodulin like 37
BnaC09G0026700ZS	N_WCS417_30m	N_Control	409.855	1949.6	1179.73	-2.24893	0.118043	-19.0518	6.34213e-81	5.49839e-78	Down	N_WCS417_30m-N_Control	RNC	AT3G28340	GolS8	Encodes a protein with putative galacturonosyltransferase activity.
BnaA06G0206400ZS	N_WCS417_30m	N_Control	6657.37	14251	10454.2	-1.09807	0.0579053	-18.9633	3.43049e-80	2.92003e-77	Down	N_WCS417_30m-N_Control	RNC	--	--	--
BnaA05G0270500ZS	N_WCS417_30m	N_Control	8989.63	17740.8	13365.2	-0.980693	0.0517507	-18.9503	4.38974e-80	3.66983e-77	Normal	N_WCS417_30m-N_Control	RNC	--	--	--
BnaA09G0523700ZS	N_WCS417_30m	N_Control	1136.19	3422.92	2279.55	-1.59127	0.08398	-18.9482	4.57062e-80	3.754e-77	Down	N_WCS417_30m-N_Control	RNC	AT3G56880	--	VQ motif-containing protein
BnaA04G0034000ZS	N_WCS417_30m	N_Control	5347.56	2138.39	3742.98	1.32213	0.0698146	18.9378	5.57204e-80	4.49759e-77	Up	N_WCS417_30m-N_Control	RNC	AT2G27030	CAM5	encodes a calmodulin that has higher affinity to kinesin-like calmodulin binding motor protein than CAM4 or CAM6.
Bnascaffold0027G0071300ZS	N_WCS417_30m	N_Control	13184.5	24415.7	18800.1	-0.888947	0.0469878	-18.9187	8.00272e-80	6.29232e-77	Normal	N_WCS417_30m-N_Control	RNC	--	--	--
BnaA07G0349100ZS	N_WCS417_30m	N_Control	24.1125	745.355	384.734	-4.94831	0.261562	-18.9183	8.06432e-80	6.29232e-77	Down	N_WCS417_30m-N_Control	RNC	AT1G74930	ORA47	encodes a member of the DREB subfamily A-5 of ERF/AP2 transcription factor family. The protein contains one AP2 domain. There are 15 members in this subfamily including RAP2.1, RAP2.9 and RAP2.10.
BnaA04G0207500ZS	N_WCS417_30m	N_Control	387.65	1787.54	1087.6	-2.20496	0.116601	-18.9102	9.39288e-80	7.2088e-77	Down	N_WCS417_30m-N_Control	RNC	AT2G31880	SOBIR1	Encodes a putative leucine rich repeat transmembrane protein that is expressed in response to Pseudomonas syringae. Expression of SRRLK may be required for silencing via lsiRNAs. Regulates cell death and innate immunity.
BnaA09G0338400ZS	N_WCS417_30m	N_Control	17133.4	34332.8	25733.1	-1.00282	0.0530514	-18.9028	1.08225e-79	8.17205e-77	Down	N_WCS417_30m-N_Control	RNC	--	--	--
BnaA06G0248200ZS	N_WCS417_30m	N_Control	5710.55	11773.5	8742.03	-1.04385	0.0555319	-18.7974	7.93743e-79	5.8984e-76	Down	N_WCS417_30m-N_Control	RNC	--	--	--
BnaC04G0179500ZS	N_WCS417_30m	N_Control	284.603	1506.95	895.776	-2.40542	0.128073	-18.7817	1.06626e-78	7.79967e-76	Down	N_WCS417_30m-N_Control	RNC	AT2G30020	AP2C1	Encodes AP2C1. Belongs to the clade B of the PP2C-superfamily. Acts as a MAPK phosphatase that negatively regulates MPK4 and MPK6.
BnaA06G0248600ZS	N_WCS417_30m	N_Control	15493.9	28466.3	21980.1	-0.877516	0.0467286	-18.779	1.12138e-78	8.07669e-76	Normal	N_WCS417_30m-N_Control	RNC	--	--	--
BnaC09G0564100ZS	N_WCS417_30m	N_Control	1490.45	4249.94	2870.19	-1.51182	0.0805828	-18.7611	1.57199e-78	1.11506e-75	Down	N_WCS417_30m-N_Control	RNC	AT5G08790	ATAF2	induced by wounding, belongs to a large family of putative transcriptional activators with NAC domain.
BnaA05G0304400ZS	N_WCS417_30m	N_Control	14275.1	27031.4	20653.3	-0.921101	0.049273	-18.6938	5.55869e-78	3.88412e-75	Normal	N_WCS417_30m-N_Control	RNC	--	--	--
BnaC03G0498600ZS	N_WCS417_30m	N_Control	6824.94	2703.49	4764.21	1.33652	0.0715839	18.6707	8.5795e-78	5.90673e-75	Up	N_WCS417_30m-N_Control	RNC	AT5G02500	HSP70-1	encodes a member of heat shock protein 70 family.
BnaA07G0094900ZS	N_WCS417_30m	N_Control	576.498	2176.25	1376.37	-1.91632	0.102775	-18.6456	1.36985e-77	9.29431e-75	Down	N_WCS417_30m-N_Control	RNC	AT1G28370	ERF11	encodes a member of the ERF (ethylene response factor) subfamily B-1 of ERF/AP2 transcription factor family. The protein contains one AP2 domain. There are 15 members in this subfamily including ATERF-3, ATERF-4, ATERF-7, and leafy petiole.
Bnascaffold0027G0030900ZS	N_WCS417_30m	N_Control	9068.76	17448.1	13258.4	-0.944123	0.0510634	-18.4892	2.52036e-76	1.68562e-73	Normal	N_WCS417_30m-N_Control	RNC	--	--	--
Bnascaffold0027G0031600ZS	N_WCS417_30m	N_Control	10074.2	18941.6	14507.9	-0.910914	0.0493591	-18.4548	4.76736e-76	3.1435e-73	Normal	N_WCS417_30m-N_Control	RNC	--	--	--
BnaA05G0212500ZS	N_WCS417_30m	N_Control	21358.8	38651.7	30005.2	-0.855657	0.0463881	-18.4456	5.65782e-76	3.67884e-73	Normal	N_WCS417_30m-N_Control	RNC	--	--	--
Bnascaffold0027G0031400ZS	N_WCS417_30m	N_Control	8968.97	16925.1	12947	-0.916137	0.0497182	-18.4266	8.04085e-76	5.15672e-73	Normal	N_WCS417_30m-N_Control	RNC	--	--	--
BnaC05G0153400ZS	N_WCS417_30m	N_Control	97.5238	1028.86	563.19	-3.40267	0.185167	-18.3763	2.03458e-75	1.28717e-72	Down	N_WCS417_30m-N_Control	RNC	AT1G18300	NUDT4	nudix hydrolase homolog 4
BnaA05G0363900ZS	N_WCS417_30m	N_Control	407.702	1757.2	1082.45	-2.10719	0.114783	-18.3581	2.84628e-75	1.77668e-72	Down	N_WCS417_30m-N_Control	RNC	AT3G19595	--	Haloacid dehalogenase-like hydrolase (HAD) superfamily protein
BnaC04G0094900ZS	N_WCS417_30m	N_Control	2505.82	755.138	1630.48	1.73061	0.0942767	18.3567	2.91672e-75	1.7967e-72	Up	N_WCS417_30m-N_Control	RNC	AT2G37040	PAL1	Encodes PAL1, a phenylalanine ammonia-lyase. Arabidopsis has four PALs: AT2G37040 (PAL1), AT3G53260 (PAL2), AT5G04230 (PAL3) and AT3G10340 (PAL4).
BnaA01G0238500ZS	N_WCS417_30m	N_Control	4540.63	9317.79	6929.21	-1.0371	0.0565026	-18.3549	3.01513e-75	1.8332e-72	Down	N_WCS417_30m-N_Control	RNC	--	--	--
BnaC07G0317400ZS	N_WCS417_30m	N_Control	1392.56	4102.31	2747.44	-1.55817	0.0849577	-18.3405	3.92892e-75	2.35816e-72	Down	N_WCS417_30m-N_Control	RNC	AT3G29010	--	Biotin/lipoate A/B protein ligase family
BnaA09G0338800ZS	N_WCS417_30m	N_Control	16322.5	33915.6	25119	-1.05517	0.0576372	-18.3071	7.26266e-75	4.30391e-72	Down	N_WCS417_30m-N_Control	RNC	--	--	--
BnaA04G0192500ZS	N_WCS417_30m	N_Control	158.413	1081.24	619.828	-2.77002	0.151779	-18.2504	2.05238e-74	1.20105e-71	Down	N_WCS417_30m-N_Control	RNC	AT2G30020	AP2C1	Encodes AP2C1. Belongs to the clade B of the PP2C-superfamily. Acts as a MAPK phosphatase that negatively regulates MPK4 and MPK6.
BnaA04G0070500ZS	N_WCS417_30m	N_Control	1672.47	362.158	1017.32	2.20612	0.120926	18.2436	2.32765e-74	1.34532e-71	Up	N_WCS417_30m-N_Control	RNC	AT3G53260	PAL2	Encodes phenylalanine lyase. Arabidopsis has four PALs: AT2G37040 (PAL1), AT3G53260 (PAL2), AT5G04230 (PAL3) and AT3G10340 (PAL4).
BnaA09G0592200ZS	N_WCS417_30m	N_Control	2389.49	5535.82	3962.65	-1.21203	0.0665683	-18.2073	4.51456e-74	2.57748e-71	Down	N_WCS417_30m-N_Control	RNC	AT2G22500	UCP5	Encodes one of the mitochondrial dicarboxylate carriers (DIC): DIC1 (AT2G22500), DIC2 (AT4G24570), DIC3 (AT5G09470).
BnaC01G0254400ZS	N_WCS417_30m	N_Control	4164.02	1605.62	2884.82	1.37489	0.075618	18.1821	7.16036e-74	4.03879e-71	Up	N_WCS417_30m-N_Control	RNC	AT4G13310	CYP71A20	putative cytochrome P450
Bnascaffold0034G0001400ZS	N_WCS417_30m	N_Control	7310.95	14000.6	10655.8	-0.937375	0.051594	-18.1683	9.20146e-74	5.12828e-71	Normal	N_WCS417_30m-N_Control	RNC	--	--	--
BnaA06G0121800ZS	N_WCS417_30m	N_Control	328.034	1818.55	1073.29	-2.46933	0.136651	-18.0703	5.45952e-73	3.00697e-70	Down	N_WCS417_30m-N_Control	RNC	AT1G17750	PEPR2	Encodes PEPR2, a plasma membrane leucine-rich repeat receptor kinase functioning as a receptor for the Pep1 and Pep2 peptides. Pep1 and Pep2 are amino acids that induce the transcription of defense-related genes.
BnaC09G0442000ZS	N_WCS417_30m	N_Control	713.96	2373.76	1543.86	-1.73313	0.0961005	-18.0345	1.04346e-72	5.68028e-70	Down	N_WCS417_30m-N_Control	RNC	AT5G60680	--	Protein of unknown function, DUF584
BnaC06G0113600ZS	N_WCS417_30m	N_Control	2301.22	668.333	1484.78	1.78323	0.099133	17.9883	2.40622e-72	1.29482e-69	Up	N_WCS417_30m-N_Control	RNC	AT1G51680	AT4CL1	encodes an isoform of 4-coumarate:CoA ligase (4CL), which is involved in the last step of the general phenylpropanoid pathway. In addition to 4-coumarate, it also converts ferulate. The catalytic efficiency was in the following (descending) order: p-coumaric acid, ferulic acid, caffeic acid and 5-OH-ferulic acid. At4CL1 was unable to use sinapic acid as substrate.
BnaC03G0772700ZS	N_WCS417_30m	N_Control	7257.6	3368.62	5313.11	1.10727	0.061809	17.9144	9.10557e-72	4.84416e-69	Up	N_WCS417_30m-N_Control	RNC	AT4G30530	GGP1	Encodes a gamma-glutamyl peptidase, outside the GGT family, that can hydrolyze gamma-glutamyl peptide bonds.
Bnascaffold0027G0031100ZS	N_WCS417_30m	N_Control	9119.7	17512.8	13316.3	-0.941332	0.052555	-17.9114	9.61612e-72	5.0583e-69	Normal	N_WCS417_30m-N_Control	RNC	--	--	--
BnaC08G0232400ZS	N_WCS417_30m	N_Control	1571.44	315.481	943.46	2.31609	0.129672	17.8612	2.36403e-71	1.22971e-68	Up	N_WCS417_30m-N_Control	RNC	AT1G15210	PDR7	pleiotropic drug resistance 7
BnaA02G0292400ZS	N_WCS417_30m	N_Control	5131.44	2143	3637.22	1.25971	0.0706468	17.8311	4.05034e-71	2.08374e-68	Up	N_WCS417_30m-N_Control	RNC	AT5G45280	PAE11	Pectinacetylesterase family protein
BnaC06G0072700ZS	N_WCS417_30m	N_Control	1246.37	220.941	733.656	2.49597	0.140052	17.8217	4.79339e-71	2.43921e-68	Up	N_WCS417_30m-N_Control	RNC	AT3G15450	--	Aluminium induced protein with YGL and LRDR motifs
BnaC01G0104800ZS	N_WCS417_30m	N_Control	254.785	1352.46	803.624	-2.40888	0.135208	-17.8161	5.29988e-71	2.66795e-68	Down	N_WCS417_30m-N_Control	RNC	AT4G17490	ERF6	Encodes a member of the ERF (ethylene response factor) subfamily B-3 of ERF/AP2 transcription factor family (ATERF-6). The protein contains one AP2 domain. There are 18 members in this subfamily including ATERF-1, ATERF-2, AND ATERF-5. It is involved in the response to reactive oxygen species and light stress.
BnaA07G0385600ZS	N_WCS417_30m	N_Control	974.16	103.385	538.773	3.23195	0.181569	17.8002	7.04425e-71	3.50834e-68	Up	N_WCS417_30m-N_Control	RNC	AT1G80820	CCR2	Encodes an cinnamoyl CoA reductase isoform. Involved in lignin biosynthesis.
BnaC05G0568000ZS	N_WCS417_30m	N_Control	3567.55	1336.39	2451.97	1.41662	0.0798538	17.7401	2.05478e-70	1.01259e-67	Up	N_WCS417_30m-N_Control	RNC	AT3G02360	PGD2	6-phosphogluconate dehydrogenase family protein
Bnascaffold0027G0049200ZS	N_WCS417_30m	N_Control	7845.55	15411.4	11628.5	-0.973931	0.0549986	-17.7083	3.61759e-70	1.76418e-67	Normal	N_WCS417_30m-N_Control	RNC	--	--	--
BnaA09G0285000ZS	N_WCS417_30m	N_Control	3227.02	6938.04	5082.53	-1.10428	0.0624006	-17.6967	4.44532e-70	2.14548e-67	Down	N_WCS417_30m-N_Control	RNC	--	--	--
BnaA06G0204200ZS	N_WCS417_30m	N_Control	24015.1	44888.2	34451.7	-0.902402	0.0510202	-17.6871	5.26795e-70	2.51658e-67	Normal	N_WCS417_30m-N_Control	RNC	--	--	--
BnaC04G0496900ZS	N_WCS417_30m	N_Control	406.549	1691.54	1049.04	-2.05664	0.116547	-17.6464	1.08393e-69	5.12577e-67	Down	N_WCS417_30m-N_Control	RNC	AT2G30020	AP2C1	Encodes AP2C1. Belongs to the clade B of the PP2C-superfamily. Acts as a MAPK phosphatase that negatively regulates MPK4 and MPK6.
BnaA07G0259300ZS	N_WCS417_30m	N_Control	1416.17	288.357	852.262	2.29691	0.130436	17.6095	2.08298e-69	9.75167e-67	Up	N_WCS417_30m-N_Control	RNC	AT1G72360	HRE1	Encodes a member of the ERF (ethylene response factor) subfamily B-2 of ERF/AP2 transcription factor family. The protein contains one AP2 domain. There are 5 members in this subfamily including RAP2.2 AND RAP2.12.
BnaA09G0516200ZS	N_WCS417_30m	N_Control	2128.52	5247.93	3688.23	-1.30163	0.0739844	-17.5933	2.77418e-69	1.2859e-66	Down	N_WCS417_30m-N_Control	RNC	AT3G55980	TZF11	salt-inducible zinc finger 1
BnaC06G0453400ZS	N_WCS417_30m	N_Control	997.003	115.956	556.48	3.10814	0.176771	17.5829	3.33192e-69	1.52929e-66	Up	N_WCS417_30m-N_Control	RNC	AT1G80820	CCR2	Encodes an cinnamoyl CoA reductase isoform. Involved in lignin biosynthesis.
BnaA07G0111900ZS	N_WCS417_30m	N_Control	1579.3	366.929	973.115	2.10574	0.1198	17.5771	3.69133e-69	1.6778e-66	Up	N_WCS417_30m-N_Control	RNC	AT1G27130	GSTU13	Encodes glutathione transferase belonging to the tau class of GSTs. Naming convention according to Wagner et al. (2002).
BnaA10G0250600ZS	N_WCS417_30m	N_Control	1916.06	4596.45	3256.25	-1.26241	0.0718255	-17.5761	3.75602e-69	1.69079e-66	Down	N_WCS417_30m-N_Control	RNC	AT5G08790	ATAF2	induced by wounding, belongs to a large family of putative transcriptional activators with NAC domain.
Bnascaffold0031G0002000ZS	N_WCS417_30m	N_Control	8625.5	16070.1	12347.8	-0.897742	0.0511139	-17.5635	4.68559e-69	2.08915e-66	Normal	N_WCS417_30m-N_Control	RNC	--	--	--
BnaA06G0248400ZS	N_WCS417_30m	N_Control	5509.08	11165.8	8337.44	-1.01917	0.0582134	-17.5074	1.25748e-68	5.55381e-66	Down	N_WCS417_30m-N_Control	RNC	--	--	--
Bnascaffold0027G0049600ZS	N_WCS417_30m	N_Control	10249.8	19443.1	14846.5	-0.923552	0.0527677	-17.5022	1.37806e-68	6.02946e-66	Normal	N_WCS417_30m-N_Control	RNC	--	--	--
Bnascaffold0025G0032500ZS	N_WCS417_30m	N_Control	7085.69	13466	10275.9	-0.926287	0.0531807	-17.4177	6.05524e-68	2.62483e-65	Normal	N_WCS417_30m-N_Control	RNC	--	--	--
Bnascaffold0025G0032200ZS	N_WCS417_30m	N_Control	6847.15	13152.3	9999.73	-0.941666	0.0540849	-17.4109	6.82281e-68	2.93043e-65	Normal	N_WCS417_30m-N_Control	RNC	--	--	--
BnaA01G0086200ZS	N_WCS417_30m	N_Control	555.538	1994.31	1274.92	-1.84339	0.105946	-17.3994	8.33283e-68	3.54645e-65	Down	N_WCS417_30m-N_Control	RNC	AT4G17490	ERF6	Encodes a member of the ERF (ethylene response factor) subfamily B-3 of ERF/AP2 transcription factor family (ATERF-6). The protein contains one AP2 domain. There are 18 members in this subfamily including ATERF-1, ATERF-2, AND ATERF-5. It is involved in the response to reactive oxygen species and light stress.
Bnascaffold0137G0000300ZS	N_WCS417_30m	N_Control	11943.9	21244.9	16594.4	-0.830844	0.0478565	-17.3612	1.62434e-67	6.85092e-65	Normal	N_WCS417_30m-N_Control	RNC	--	--	--
BnaA10G0195700ZS	N_WCS417_30m	N_Control	4142.42	1647.84	2895.13	1.32947	0.0768091	17.3088	4.03798e-67	1.68787e-64	Up	N_WCS417_30m-N_Control	RNC	AT5G17330	GAD1	Encodes one of two isoforms of glutamate decarboxylase.
BnaC08G0464100ZS	N_WCS417_30m	N_Control	61.5645	710.488	386.026	-3.52738	0.204125	-17.2805	6.60073e-67	2.73469e-64	Down	N_WCS417_30m-N_Control	RNC	AT1G19210	ERF17	encodes a member of the DREB subfamily A-5 of ERF/AP2 transcription factor family. The protein contains one AP2 domain. There are 15 members in this subfamily including RAP2.1, RAP2.9 and RAP2.10.
BnaA06G0206700ZS	N_WCS417_30m	N_Control	9343.35	17657.6	13500.5	-0.91822	0.0534148	-17.1904	3.1362e-66	1.28793e-63	Normal	N_WCS417_30m-N_Control	RNC	--	--	--
BnaA06G0378000ZS	N_WCS417_30m	N_Control	252.175	1280.59	766.382	-2.3453	0.136594	-17.1699	4.46476e-66	1.81758e-63	Down	N_WCS417_30m-N_Control	RNC	AT3G28340	GolS8	Encodes a protein with putative galacturonosyltransferase activity.
BnaC01G0087400ZS	N_WCS417_30m	N_Control	775.221	65.4327	420.327	3.56787	0.208022	17.1514	6.13996e-66	2.47801e-63	Up	N_WCS417_30m-N_Control	RNC	AT4G29930	--	basic helix-loop-helix (bHLH) DNA-binding superfamily protein
Bnascaffold0027G0049000ZS	N_WCS417_30m	N_Control	6682.85	13333.5	10008.2	-0.996618	0.0582757	-17.1018	1.43908e-65	5.7583e-63	Normal	N_WCS417_30m-N_Control	RNC	--	--	--
BnaA09G0335800ZS	N_WCS417_30m	N_Control	3892.04	7850.79	5871.42	-1.0123	0.0594484	-17.0282	5.0784e-65	2.01483e-62	Down	N_WCS417_30m-N_Control	RNC	--	--	--
BnaC07G0169100ZS	N_WCS417_30m	N_Control	1931.33	554.076	1242.7	1.80119	0.105959	16.999	8.35968e-65	3.2888e-62	Up	N_WCS417_30m-N_Control	RNC	AT1G27130	GSTU13	Encodes glutathione transferase belonging to the tau class of GSTs. Naming convention according to Wagner et al. (2002).
BnaA02G0041500ZS	N_WCS417_30m	N_Control	1886.05	518.008	1202.03	1.86389	0.109759	16.9816	1.12396e-64	4.38493e-62	Up	N_WCS417_30m-N_Control	RNC	AT5G11670	NADP-ME2	The malic enzyme (EC 1.1.1.40) encoded by AtNADP-ME2 is presumably a cytosolic enzyme involved in malate metabolism and possibly assisting the oxidative pentose phosphate pathway. AtNADP-ME2 counts for the major part of NADP-ME activity in mature tissues of Arabidopsis.
Bnascaffold1944G0000100ZS	N_WCS417_30m	N_Control	15318.5	27935.1	21626.8	-0.866845	0.0510756	-16.9718	1.32767e-64	5.13689e-62	Normal	N_WCS417_30m-N_Control	RNC	--	--	--
BnaA06G0249700ZS	N_WCS417_30m	N_Control	4744.49	10462	7603.24	-1.14057	0.0672798	-16.9526	1.83982e-64	7.06007e-62	Down	N_WCS417_30m-N_Control	RNC	--	--	--
BnaA05G0237100ZS	N_WCS417_30m	N_Control	4879.42	9439.84	7159.63	-0.952055	0.0562952	-16.9118	3.68016e-64	1.40073e-61	Normal	N_WCS417_30m-N_Control	RNC	--	--	--
BnaA09G0297300ZS	N_WCS417_30m	N_Control	3611.15	7352.88	5482.02	-1.02588	0.0607128	-16.8973	4.70844e-64	1.77766e-61	Down	N_WCS417_30m-N_Control	RNC	--	--	--
BnaA05G0259200ZS	N_WCS417_30m	N_Control	6918.71	15846.4	11382.6	-1.19576	0.0709501	-16.8535	9.89486e-64	3.7059e-61	Down	N_WCS417_30m-N_Control	RNC	--	--	--
Bnascaffold0027G0065800ZS	N_WCS417_30m	N_Control	5560.26	10907.8	8234.04	-0.972233	0.0577315	-16.8406	1.23013e-63	4.57061e-61	Normal	N_WCS417_30m-N_Control	RNC	--	--	--
Bnascaffold0027G0049400ZS	N_WCS417_30m	N_Control	6154.37	11495.4	8824.88	-0.901333	0.0535323	-16.8372	1.30301e-63	4.8033e-61	Normal	N_WCS417_30m-N_Control	RNC	--	--	--
BnaA05G0132000ZS	N_WCS417_30m	N_Control	6275.21	2734.75	4504.98	1.19844	0.0712649	16.8167	1.83996e-63	6.72966e-61	Up	N_WCS417_30m-N_Control	RNC	AT2G30490	REF3	Encodes a cinnamate-4-hydroxylase. Mutations in this gene impact phenylpropanoid metabolism, growth and development.
BnaA08G0319800ZS	N_WCS417_30m	N_Control	3886.64	1610.08	2748.36	1.27134	0.0757008	16.7943	2.68726e-63	9.75248e-61	Up	N_WCS417_30m-N_Control	RNC	AT1G03220	SAP2	Eukaryotic aspartyl protease family protein
Bnascaffold0198G0000100ZS	N_WCS417_30m	N_Control	10141	17983.3	14062.1	-0.826431	0.0492252	-16.7888	2.94837e-63	1.06178e-60	Normal	N_WCS417_30m-N_Control	RNC	--	--	--
Bnascaffold0027G0071200ZS	N_WCS417_30m	N_Control	9001.04	16706.7	12853.9	-0.89237	0.053269	-16.7521	5.46322e-63	1.95241e-60	Normal	N_WCS417_30m-N_Control	RNC	--	--	--
BnaA10G0284600ZS	N_WCS417_30m	N_Control	796.209	2503.26	1649.74	-1.65299	0.0987102	-16.7459	6.06947e-63	2.15264e-60	Down	N_WCS417_30m-N_Control	RNC	AT5G04340	ZAT6	putative c2h2 zinc finger transcription factor mRNA,
Bnascaffold2179G0000700ZS	N_WCS417_30m	N_Control	5577.39	10520.1	8048.76	-0.915465	0.0547172	-16.7308	7.81225e-63	2.74377e-60	Normal	N_WCS417_30m-N_Control	RNC	--	--	--
BnaA05G0258400ZS	N_WCS417_30m	N_Control	4030.12	8007.51	6018.81	-0.990543	0.0592057	-16.7305	7.85341e-63	2.74377e-60	Normal	N_WCS417_30m-N_Control	RNC	--	--	--
BnaA05G0230200ZS	N_WCS417_30m	N_Control	4924.48	9583.63	7254.06	-0.960722	0.0574283	-16.7291	8.05093e-63	2.79194e-60	Normal	N_WCS417_30m-N_Control	RNC	--	--	--
BnaA05G0118400ZS	N_WCS417_30m	N_Control	1246	250.433	748.218	2.31458	0.138387	16.7254	8.56621e-63	2.94879e-60	Up	N_WCS417_30m-N_Control	RNC	AT2G32150	XMPP	Haloacid dehalogenase-like hydrolase (HAD) superfamily protein
Bnascaffold0039G0000700ZS	N_WCS417_30m	N_Control	6017.32	11199.8	8608.57	-0.896265	0.0536414	-16.7085	1.13707e-62	3.88563e-60	Normal	N_WCS417_30m-N_Control	RNC	--	--	--
BnaA06G0204400ZS	N_WCS417_30m	N_Control	25053	46166.6	35609.8	-0.881867	0.0530735	-16.6159	5.34353e-62	1.81277e-59	Normal	N_WCS417_30m-N_Control	RNC	--	--	--
BnaA09G0326500ZS	N_WCS417_30m	N_Control	4474.51	8805.25	6639.88	-0.976769	0.0588431	-16.5995	7.02246e-62	2.36521e-59	Normal	N_WCS417_30m-N_Control	RNC	--	--	--
BnaA09G0296900ZS	N_WCS417_30m	N_Control	2999.52	6583.5	4791.51	-1.13441	0.0683857	-16.5884	8.459e-62	2.82869e-59	Down	N_WCS417_30m-N_Control	RNC	--	--	--
BnaC06G0181900ZS	N_WCS417_30m	N_Control	1662.17	398.419	1030.3	2.06233	0.124444	16.5724	1.10346e-61	3.6638e-59	Up	N_WCS417_30m-N_Control	RNC	AT3G53260	PAL2	Encodes phenylalanine lyase. Arabidopsis has four PALs: AT2G37040 (PAL1), AT3G53260 (PAL2), AT5G04230 (PAL3) and AT3G10340 (PAL4).
BnaA09G0362300ZS	N_WCS417_30m	N_Control	4057.04	8008.03	6032.53	-0.980919	0.0593534	-16.5268	2.3548e-61	7.76355e-59	Normal	N_WCS417_30m-N_Control	RNC	--	--	--
BnaC09G0267600ZS	N_WCS417_30m	N_Control	1887.55	554.624	1221.08	1.76662	0.106987	16.5125	2.98457e-61	9.77102e-59	Up	N_WCS417_30m-N_Control	RNC	AT3G25780	AOC3	Encodes allene oxide cyclase, one of the enzymes involved in jasmonic acid biosynthesis. One of four genes in Arabidopsis that encode this enzyme. mRNA expression is upregulated in senescing leaves. Note: Nomenclature for Arabidopsis allene oxide cyclase 3 (AOC3, AT3G25780) gene is based on Stenzel et al. 2003 Plant Molecular Biology 51:895-911. AOC3 (AT3G25780) is also referred to as AOC2 in He …
BnaA06G0248800ZS	N_WCS417_30m	N_Control	14555.1	27854.7	21204.9	-0.936355	0.0567268	-16.5064	3.30061e-61	1.07307e-58	Normal	N_WCS417_30m-N_Control	RNC	--	--	--
BnaA05G0287800ZS	N_WCS417_30m	N_Control	4743.86	9364.72	7054.29	-0.981087	0.0594556	-16.5012	3.59815e-61	1.16173e-58	Normal	N_WCS417_30m-N_Control	RNC	--	--	--
BnaA06G0190900ZS	N_WCS417_30m	N_Control	1479.7	3578.52	2529.11	-1.27414	0.0773422	-16.4741	5.63169e-61	1.80584e-58	Down	N_WCS417_30m-N_Control	RNC	AT3G44260	CAF1a	Encodes one of the homologs of the yeast CCR4-associated factor 1: AT3G44260 (CAF1a), AT5G22250 (CAF1b). Has mRNA deadenylation activity. Also plays a role in plant defense responses.
Bnascaffold0025G0031900ZS	N_WCS417_30m	N_Control	6821.91	12754.7	9788.31	-0.902796	0.0549821	-16.4198	1.37974e-60	4.39413e-58	Normal	N_WCS417_30m-N_Control	RNC	--	--	--
Bnascaffold0044G0000900ZS	N_WCS417_30m	N_Control	5710.07	10824.5	8267.3	-0.922771	0.0562064	-16.4175	1.4327e-60	4.53198e-58	Normal	N_WCS417_30m-N_Control	RNC	--	--	--
BnaC09G0452600ZS	N_WCS417_30m	N_Control	2264.38	723.627	1494	1.64601	0.100273	16.4153	1.4872e-60	4.66656e-58	Up	N_WCS417_30m-N_Control	RNC	AT5G21940	--	--
BnaA10G0168800ZS	N_WCS417_30m	N_Control	2159.69	4751.22	3455.46	-1.13741	0.0692914	-16.4149	1.49518e-60	4.66656e-58	Down	N_WCS417_30m-N_Control	RNC	--	--	--
BnaA05G0219600ZS	N_WCS417_30m	N_Control	2833.99	5874.89	4354.44	-1.05176	0.0641555	-16.3939	2.11557e-60	6.55912e-58	Down	N_WCS417_30m-N_Control	RNC	--	--	--
BnaA05G0249700ZS	N_WCS417_30m	N_Control	4355.84	9067.47	6711.65	-1.05761	0.0645249	-16.3907	2.22783e-60	6.86172e-58	Down	N_WCS417_30m-N_Control	RNC	--	--	--
BnaA05G0244700ZS	N_WCS417_30m	N_Control	2866.67	6057.47	4462.07	-1.07928	0.0658491	-16.3902	2.24557e-60	6.87116e-58	Down	N_WCS417_30m-N_Control	RNC	--	--	--
BnaA01G0240100ZS	N_WCS417_30m	N_Control	6466.33	11899.7	9183.02	-0.879886	0.0538259	-16.3469	4.57805e-60	1.39173e-57	Normal	N_WCS417_30m-N_Control	RNC	--	--	--
BnaC02G0206400ZS	N_WCS417_30m	N_Control	2425.32	845.085	1635.2	1.52096	0.0931021	16.3365	5.43052e-60	1.64023e-57	Up	N_WCS417_30m-N_Control	RNC	AT3G44840	--	S-adenosyl-L-methionine-dependent methyltransferases superfamily protein
Bnascaffold0027G0071100ZS	N_WCS417_30m	N_Control	12139.2	23284.9	17712	-0.939841	0.0575789	-16.3227	6.80863e-60	2.04329e-57	Normal	N_WCS417_30m-N_Control	RNC	--	--	--
Bnascaffold0026G0033600ZS	N_WCS417_30m	N_Control	2134.3	4796.45	3465.38	-1.16823	0.0716157	-16.3126	8.03554e-60	2.39613e-57	Down	N_WCS417_30m-N_Control	RNC	--	--	--
BnaC09G0453300ZS	N_WCS417_30m	N_Control	4982.02	9559.86	7270.94	-0.940359	0.0576856	-16.3014	9.63988e-60	2.85633e-57	Normal	N_WCS417_30m-N_Control	RNC	AT3G43810	ZBF3	EF hand domain protein encodes a calmodulin. Can functionally complement a yeast CaM mutant.
BnaA09G0336400ZS	N_WCS417_30m	N_Control	4334.53	8437.99	6386.26	-0.960967	0.0589687	-16.2962	1.04989e-59	3.09129e-57	Normal	N_WCS417_30m-N_Control	RNC	--	--	--
BnaA02G0161300ZS	N_WCS417_30m	N_Control	2683.31	984.795	1834.05	1.44604	0.0888804	16.2695	1.62425e-59	4.75256e-57	Up	N_WCS417_30m-N_Control	RNC	AT3G44860	FAMT	Encodes a farnesoic acid carboxyl-O-methyltransferase.
Bnascaffold0027G0027900ZS	N_WCS417_30m	N_Control	3996.06	7818.91	5907.48	-0.968293	0.059524	-16.2673	1.68512e-59	4.90004e-57	Normal	N_WCS417_30m-N_Control	RNC	--	--	--
BnaA09G0326900ZS	N_WCS417_30m	N_Control	3201.05	6866.06	5033.55	-1.10092	0.0677678	-16.2454	2.40676e-59	6.95524e-57	Down	N_WCS417_30m-N_Control	RNC	--	--	--
BnaA09G0382000ZS	N_WCS417_30m	N_Control	3289.97	1318.03	2304	1.31991	0.0813734	16.2204	3.62062e-59	1.0399e-56	Up	N_WCS417_30m-N_Control	RNC	AT1G33590	--	Leucine-rich repeat (LRR) family protein
BnaA05G0257900ZS	N_WCS417_30m	N_Control	4537.19	9186.64	6861.92	-1.01792	0.0629031	-16.1823	6.71821e-59	1.9178e-56	Down	N_WCS417_30m-N_Control	RNC	--	--	--
BnaA01G0203700ZS	N_WCS417_30m	N_Control	2701.57	1007.09	1854.33	1.42363	0.0881786	16.1448	1.23501e-58	3.50415e-56	Up	N_WCS417_30m-N_Control	RNC	AT3G22890	ATPS1	encodes ATP sulfurylase, the first enzyme in the sulfate assimilation pathway of Arabidopsis. It may also participate in selenium metabolism.
Bnascaffold0027G0029800ZS	N_WCS417_30m	N_Control	13450.5	23817.7	18634.1	-0.824345	0.0510747	-16.14	1.33603e-58	3.76794e-56	Normal	N_WCS417_30m-N_Control	RNC	--	--	--
BnaA05G0278000ZS	N_WCS417_30m	N_Control	3804.12	7467.53	5635.82	-0.973136	0.0603457	-16.126	1.67425e-58	4.69351e-56	Normal	N_WCS417_30m-N_Control	RNC	--	--	--
BnaA05G0298800ZS	N_WCS417_30m	N_Control	3247.19	6496.62	4871.9	-1.00049	0.0620468	-16.1248	1.70792e-58	4.74865e-56	Down	N_WCS417_30m-N_Control	RNC	--	--	--
BnaC04G0500500ZS	N_WCS417_30m	N_Control	2390.36	828.413	1609.39	1.5292	0.0948367	16.1246	1.7142e-58	4.74865e-56	Up	N_WCS417_30m-N_Control	RNC	AT2G30490	REF3	Encodes a cinnamate-4-hydroxylase. Mutations in this gene impact phenylpropanoid metabolism, growth and development.
Bnascaffold0066G0000700ZS	N_WCS417_30m	N_Control	5229.4	9906.51	7567.95	-0.921796	0.0572587	-16.0988	2.60083e-58	7.16237e-56	Normal	N_WCS417_30m-N_Control	RNC	--	--	--
BnaC05G0126000ZS	N_WCS417_30m	N_Control	5825.24	2815.33	4320.28	1.04915	0.0652113	16.0885	3.06986e-58	8.40459e-56	Up	N_WCS417_30m-N_Control	RNC	AT1G15210	PDR7	pleiotropic drug resistance 7
BnaA06G0181200ZS	N_WCS417_30m	N_Control	184.186	1024.08	604.135	-2.47449	0.153904	-16.0782	3.63043e-58	9.88151e-56	Down	N_WCS417_30m-N_Control	RNC	AT3G46620	RDUF1	Encodes an ABA- and drought-induced RING-DUF1117 gene whose mutation results in hyposensitive phenotypes toward ABA in terms of germination rate and stomatal closure and markedly reduced tolerance to drought stress relative to wild-type plants.
BnaC08G0528500ZS	N_WCS417_30m	N_Control	4718.02	2141.36	3429.69	1.13964	0.0710628	16.0371	7.04086e-58	1.90535e-55	Up	N_WCS417_30m-N_Control	RNC	AT1G08930	ERD6	encodes a putative sucrose transporter whose gene expression is induced by dehydration and cold.
Bnascaffold0517G0000300ZS	N_WCS417_30m	N_Control	10106.3	18226.3	14166.3	-0.850796	0.0530775	-16.0293	7.97428e-58	2.14554e-55	Normal	N_WCS417_30m-N_Control	RNC	--	--	--
Bnascaffold0034G0000800ZS	N_WCS417_30m	N_Control	7203	13381.2	10292.1	-0.893439	0.0557392	-16.0289	8.02608e-58	2.14714e-55	Normal	N_WCS417_30m-N_Control	RNC	--	--	--
BnaC05G0194900ZS	N_WCS417_30m	N_Control	4760.08	2043.36	3401.72	1.21988	0.0762002	16.0089	1.10721e-57	2.94518e-55	Up	N_WCS417_30m-N_Control	RNC	AT1G22410	--	Class-II DAHP synthetase family protein
Bnascaffold0039G0001000ZS	N_WCS417_30m	N_Control	6192.69	11534	8863.35	-0.897312	0.0561143	-15.9908	1.48135e-57	3.91812e-55	Normal	N_WCS417_30m-N_Control	RNC	--	--	--
BnaA05G0205600ZS	N_WCS417_30m	N_Control	10542.6	20165.3	15354	-0.935788	0.0585505	-15.9826	1.6905e-57	4.4462e-55	Normal	N_WCS417_30m-N_Control	RNC	--	--	--
Bnascaffold0047G0000800ZS	N_WCS417_30m	N_Control	7455.25	13539.9	10497.6	-0.860934	0.0538985	-15.9733	1.9624e-57	5.13249e-55	Normal	N_WCS417_30m-N_Control	RNC	--	--	--
BnaA06G0205600ZS	N_WCS417_30m	N_Control	8689.32	18054.3	13371.8	-1.05485	0.0660685	-15.966	2.20504e-57	5.73507e-55	Down	N_WCS417_30m-N_Control	RNC	--	--	--
BnaC05G0488500ZS	N_WCS417_30m	N_Control	788.668	2248.41	1518.54	-1.51139	0.0949339	-15.9205	4.56994e-57	1.18202e-54	Down	N_WCS417_30m-N_Control	RNC	AT3G11410	PP2CA	Encodes protein phosphatase 2C. Negative regulator of ABA signalling. Expressed in seeds during germination. mRNA up-regulated by drought and ABA.
BnaA09G0334000ZS	N_WCS417_30m	N_Control	2440.97	5935.02	4188	-1.28202	0.0805538	-15.9151	4.98048e-57	1.28113e-54	Down	N_WCS417_30m-N_Control	RNC	--	--	--
BnaA09G0288500ZS	N_WCS417_30m	N_Control	2129.2	4698.56	3413.88	-1.14212	0.0717771	-15.912	5.23382e-57	1.33894e-54	Down	N_WCS417_30m-N_Control	RNC	--	--	--
BnaC01G0080800ZS	N_WCS417_30m	N_Control	1614.95	449.895	1032.42	1.84449	0.116092	15.8882	7.65236e-57	1.94703e-54	Up	N_WCS417_30m-N_Control	RNC	AT4G30530	GGP1	Encodes a gamma-glutamyl peptidase, outside the GGT family, that can hydrolyze gamma-glutamyl peptide bonds.
BnaA06G0209200ZS	N_WCS417_30m	N_Control	2548.04	5565.73	4056.89	-1.127	0.0709631	-15.8815	8.50912e-57	2.15331e-54	Down	N_WCS417_30m-N_Control	RNC	--	--	--
BnaA05G0227600ZS	N_WCS417_30m	N_Control	3198.64	6614.49	4906.57	-1.04841	0.0660767	-15.8666	1.07891e-56	2.7156e-54	Down	N_WCS417_30m-N_Control	RNC	--	--	--
Bnascaffold0047G0000700ZS	N_WCS417_30m	N_Control	6306.06	11546.3	8926.2	-0.872609	0.0549993	-15.8658	1.09256e-56	2.73525e-54	Normal	N_WCS417_30m-N_Control	RNC	--	--	--
BnaA06G0204800ZS	N_WCS417_30m	N_Control	25374.6	46526.2	35950.4	-0.874641	0.0551942	-15.8466	1.48343e-56	3.68955e-54	Normal	N_WCS417_30m-N_Control	RNC	--	--	--
BnaA09G0335600ZS	N_WCS417_30m	N_Control	3046.22	6212.02	4629.12	-1.02818	0.0648843	-15.8464	1.4895e-56	3.68955e-54	Down	N_WCS417_30m-N_Control	RNC	--	--	--
Bnascaffold0044G0000100ZS	N_WCS417_30m	N_Control	6826.24	12868.7	9847.47	-0.914681	0.0577939	-15.8266	2.0394e-56	5.02509e-54	Normal	N_WCS417_30m-N_Control	RNC	--	--	--
BnaA09G0364300ZS	N_WCS417_30m	N_Control	4985.9	9609.33	7297.61	-0.94655	0.0598884	-15.8052	2.86362e-56	7.01903e-54	Normal	N_WCS417_30m-N_Control	RNC	--	--	--
BnaA03G0358900ZS	N_WCS417_30m	N_Control	492.727	1652.16	1072.44	-1.74557	0.110589	-15.7843	3.99207e-56	9.734e-54	Down	N_WCS417_30m-N_Control	RNC	AT3G19580	ZF2	Encodes zinc finger protein. mRNA levels are upregulated in response to ABA, high salt, and mild dessication. The protein is localized to the nucleus and acts as a transcriptional repressor.
BnaA07G0363200ZS	N_WCS417_30m	N_Control	631.516	1957.45	1294.48	-1.63185	0.103424	-15.7783	4.39172e-56	1.0653e-53	Down	N_WCS417_30m-N_Control	RNC	AT1G76650	CML38	calmodulin-like 38
BnaA09G0345700ZS	N_WCS417_30m	N_Control	9337.46	17728	13532.7	-0.925075	0.0586864	-15.763	5.5884e-56	1.34859e-53	Normal	N_WCS417_30m-N_Control	RNC	--	--	--
Bnascaffold0031G0001300ZS	N_WCS417_30m	N_Control	8504.62	15705.8	12105.2	-0.884908	0.0562339	-15.7362	8.53952e-56	2.05019e-53	Normal	N_WCS417_30m-N_Control	RNC	--	--	--
BnaA02G0351200ZS	N_WCS417_30m	N_Control	1794.21	4120.93	2957.57	-1.19933	0.0763121	-15.7161	1.17322e-55	2.80232e-53	Down	N_WCS417_30m-N_Control	RNC	AT5G39670	CML46	Calcium-binding EF-hand family protein
BnaC06G0428100ZS	N_WCS417_30m	N_Control	3322.38	1389.14	2355.76	1.25812	0.0800801	15.7108	1.27589e-55	3.03209e-53	Up	N_WCS417_30m-N_Control	RNC	AT1G76790	IGMT5	O-methyltransferase family protein
BnaA05G0284800ZS	N_WCS417_30m	N_Control	11127.7	21845	16486.3	-0.97322	0.0620295	-15.6896	1.78042e-55	4.20971e-53	Normal	N_WCS417_30m-N_Control	RNC	--	--	--
BnaA09G0364600ZS	N_WCS417_30m	N_Control	4150.54	7933.63	6042.09	-0.934729	0.059623	-15.6773	2.16211e-55	5.08649e-53	Normal	N_WCS417_30m-N_Control	RNC	--	--	--
BnaA05G0256600ZS	N_WCS417_30m	N_Control	3773	7299.88	5536.44	-0.952269	0.0607914	-15.6645	2.64379e-55	6.18858e-53	Normal	N_WCS417_30m-N_Control	RNC	--	--	--
BnaC01G0082000ZS	N_WCS417_30m	N_Control	843.781	2388.17	1615.98	-1.50096	0.0958232	-15.6639	2.67079e-55	6.22069e-53	Down	N_WCS417_30m-N_Control	RNC	AT4G30440	GAE1	UDP-D-glucuronate 4-epimerase
BnaA02G0132900ZS	N_WCS417_30m	N_Control	1586.3	3652.26	2619.28	-1.20328	0.0768886	-15.6496	3.34155e-55	7.74447e-53	Down	N_WCS417_30m-N_Control	RNC	AT5G54490	PBP1	Encodes a PINOID (PID)-binding protein containing putative EF-hand calcium-binding motifs. The interaction is dependent on the presence of calcium. mRNA expression is up-regulated by auxin. Not a phosphorylation target of PID, likely acts upstream of PID to regulate the activity of this protein in response to changes in calcium levels.
BnaA09G0282200ZS	N_WCS417_30m	N_Control	5234.41	10484.8	7859.6	-1.00242	0.064166	-15.6224	5.12779e-55	1.18257e-52	Down	N_WCS417_30m-N_Control	RNC	--	--	--
BnaA06G0013300ZS	N_WCS417_30m	N_Control	2351.11	807.666	1579.39	1.54109	0.0988107	15.5964	7.70481e-55	1.76818e-52	Up	N_WCS417_30m-N_Control	RNC	AT1G53210	NCL	Encodes a Na+/Ca 2+ exchanger-like protein that participates in the maintenance of Ca 2+ homeostasis.
BnaA09G0369500ZS	N_WCS417_30m	N_Control	2151.27	4568.1	3359.68	-1.08637	0.069695	-15.5874	8.86181e-55	2.02378e-52	Down	N_WCS417_30m-N_Control	RNC	--	--	--
BnaA01G0240300ZS	N_WCS417_30m	N_Control	10000.9	17033.7	13517.3	-0.768257	0.0493281	-15.5744	1.0862e-54	2.45659e-52	Normal	N_WCS417_30m-N_Control	RNC	--	--	--
BnaA05G0280700ZS	N_WCS417_30m	N_Control	4386.4	8507.38	6446.89	-0.955634	0.0613654	-15.5728	1.11337e-54	2.50594e-52	Normal	N_WCS417_30m-N_Control	RNC	--	--	--
Bnascaffold0031G0001000ZS	N_WCS417_30m	N_Control	8300.93	15220.6	11760.8	-0.874577	0.0561744	-15.569	1.18298e-54	2.64987e-52	Normal	N_WCS417_30m-N_Control	RNC	--	--	--
BnaA09G0417400ZS	N_WCS417_30m	N_Control	292.795	1205.27	749.034	-2.04154	0.131243	-15.5554	1.46298e-54	3.26147e-52	Down	N_WCS417_30m-N_Control	RNC	AT1G29340	PUB17	Encodes a protein containing a UND, a U-box, and an ARM domain. This protein has E3 ubiquitin ligase activity. It is required for cell death and full resistance specified by Arabidopsis RPM1 and RPS4 resistance proteins against Pseudomonas syringae pv tomato.
BnaA03G0021000ZS	N_WCS417_30m	N_Control	1663.37	494.801	1079.08	1.74932	0.11248	15.5522	1.53781e-54	3.41204e-52	Up	N_WCS417_30m-N_Control	RNC	AT5G05730	WEI2	ASA1 encodes the alpha subunit of anthranilate synthase, which catalyzes the rate-limiting step of tryptophan synthesis. ASA1 is induced by ethylene, and forms a link between ethylene signalling and auxin synthesis in roots.
BnaA09G0336100ZS	N_WCS417_30m	N_Control	4192.49	7966.24	6079.37	-0.926124	0.0595771	-15.545	1.72118e-54	3.80089e-52	Normal	N_WCS417_30m-N_Control	RNC	--	--	--
BnaA05G0221100ZS	N_WCS417_30m	N_Control	4767.7	9381.16	7074.43	-0.976651	0.0628526	-15.5388	1.89625e-54	4.16783e-52	Normal	N_WCS417_30m-N_Control	RNC	--	--	--
BnaA05G0282500ZS	N_WCS417_30m	N_Control	4589.93	8509.16	6549.55	-0.890503	0.0573397	-15.5303	2.16381e-54	4.73369e-52	Normal	N_WCS417_30m-N_Control	RNC	--	--	--
BnaA03G0218300ZS	N_WCS417_30m	N_Control	4380.05	1700.42	3040.24	1.36558	0.0879639	15.5243	2.37666e-54	5.17515e-52	Up	N_WCS417_30m-N_Control	RNC	AT2G44790	UCC2	Encodes a uclacyanin, a protein precursor that is closely related to precursors of stellacyanins and a blue copper protein from pea pods.
BnaA01G0110600ZS	N_WCS417_30m	N_Control	1467.42	396.037	931.729	1.88913	0.122036	15.4801	4.72771e-54	1.02469e-51	Up	N_WCS417_30m-N_Control	RNC	AT4G20780	CML42	Calcium sensor involved in trichome branching.
Bnascaffold0170G0000400ZS	N_WCS417_30m	N_Control	4003.59	7563.92	5783.76	-0.917836	0.0593291	-15.4703	5.50904e-54	1.18853e-51	Normal	N_WCS417_30m-N_Control	RNC	--	--	--
BnaA08G0166200ZS	N_WCS417_30m	N_Control	167.208	936.484	551.846	-2.4866	0.160846	-15.4595	6.5068e-54	1.39735e-51	Down	N_WCS417_30m-N_Control	RNC	AT4G27657	--	--
BnaA06G0221000ZS	N_WCS417_30m	N_Control	8945.79	16136.6	12541.2	-0.851023	0.0550523	-15.4585	6.61624e-54	1.41437e-51	Normal	N_WCS417_30m-N_Control	RNC	--	--	--
BnaA09G0303200ZS	N_WCS417_30m	N_Control	3887.71	7406.67	5647.19	-0.929823	0.0601971	-15.4463	7.99097e-54	1.70048e-51	Normal	N_WCS417_30m-N_Control	RNC	--	--	--
BnaA09G0364900ZS	N_WCS417_30m	N_Control	2770.43	5590.45	4180.44	-1.01274	0.0655729	-15.4445	8.21675e-54	1.74061e-51	Down	N_WCS417_30m-N_Control	RNC	--	--	--
BnaA06G0101500ZS	N_WCS417_30m	N_Control	5319.37	2563.43	3941.4	1.05313	0.0682231	15.4365	9.30185e-54	1.9616e-51	Up	N_WCS417_30m-N_Control	RNC	AT1G15210	PDR7	pleiotropic drug resistance 7
Bnascaffold2179G0000400ZS	N_WCS417_30m	N_Control	5534.78	9972.18	7753.48	-0.849431	0.0551239	-15.4095	1.41319e-53	2.96681e-51	Normal	N_WCS417_30m-N_Control	RNC	--	--	--
Bnascaffold0031G0001700ZS	N_WCS417_30m	N_Control	8870.42	15774.2	12322.3	-0.830466	0.0539081	-15.4052	1.50978e-53	3.15545e-51	Normal	N_WCS417_30m-N_Control	RNC	--	--	--
BnaC08G0087700ZS	N_WCS417_30m	N_Control	4011.04	7635.39	5823.22	-0.928597	0.0603689	-15.3821	2.15994e-53	4.49422e-51	Normal	N_WCS417_30m-N_Control	RNC	--	--	--
Bnascaffold0027G0050800ZS	N_WCS417_30m	N_Control	3947.66	7721.45	5834.56	-0.967671	0.0629607	-15.3694	2.62472e-53	5.43711e-51	Normal	N_WCS417_30m-N_Control	RNC	--	--	--
BnaA03G0594200ZS	N_WCS417_30m	N_Control	11063.7	19143.8	15103.7	-0.791	0.0515986	-15.3299	4.82927e-53	9.95979e-51	Normal	N_WCS417_30m-N_Control	RNC	--	--	--
BnaA09G0363000ZS	N_WCS417_30m	N_Control	3810.78	7286.47	5548.62	-0.935099	0.0610143	-15.3259	5.13348e-53	1.05407e-50	Normal	N_WCS417_30m-N_Control	RNC	--	--	--
Bnascaffold0026G0024500ZS	N_WCS417_30m	N_Control	4612.95	8555.12	6584.03	-0.890985	0.0582472	-15.2966	8.05337e-53	1.6464e-50	Normal	N_WCS417_30m-N_Control	RNC	--	--	--
Bnascaffold2851G0000100ZS	N_WCS417_30m	N_Control	9001.78	15838.2	12420	-0.81511	0.0532988	-15.2932	8.48662e-53	1.72743e-50	Normal	N_WCS417_30m-N_Control	RNC	--	--	--
BnaA03G0102100ZS	N_WCS417_30m	N_Control	246.875	1082.88	664.879	-2.13272	0.139536	-15.2843	9.73168e-53	1.97229e-50	Down	N_WCS417_30m-N_Control	RNC	AT5G59550	RDUF2	Encodes an ABA- and drought-induced RING-DUF1117 gene whose mutation results in hyposensitive phenotypes toward ABA in terms of germination rate and stomatal closure and markedly reduced tolerance to drought stress relative to wild-type plants.
BnaA05G0265900ZS	N_WCS417_30m	N_Control	2837.36	5719.21	4278.28	-1.01136	0.0662013	-15.277	1.0886e-52	2.19672e-50	Down	N_WCS417_30m-N_Control	RNC	--	--	--
BnaA09G0299100ZS	N_WCS417_30m	N_Control	3139.79	6359.97	4749.88	-1.01859	0.0666878	-15.2739	1.14052e-52	2.29161e-50	Down	N_WCS417_30m-N_Control	RNC	--	--	--
BnaA03G0020000ZS	N_WCS417_30m	N_Control	2087.04	716.681	1401.86	1.54263	0.101034	15.2684	1.24156e-52	2.48396e-50	Up	N_WCS417_30m-N_Control	RNC	AT5G05440	RCAR8	Encodes a member of the PYR (pyrabactin resistance )/PYL(PYR1-like)/RCAR (regulatory components of ABA receptor) family proteins with 14 members. PYR/PYL/RCAR family proteins function as abscisic acid sensors. Mediate ABA-dependent regulation of protein phosphatase 2Cs ABI1 and ABI2.
Bnascaffold0025G0000500ZS	N_WCS417_30m	N_Control	388.484	1417.11	902.799	-1.86756	0.122424	-15.2549	1.52676e-52	3.04157e-50	Down	N_WCS417_30m-N_Control	RNC	AT3G19580	ZF2	Encodes zinc finger protein. mRNA levels are upregulated in response to ABA, high salt, and mild dessication. The protein is localized to the nucleus and acts as a transcriptional repressor.
BnaA01G0319400ZS	N_WCS417_30m	N_Control	393.639	1426.05	909.845	-1.85754	0.121794	-15.2515	1.60905e-52	3.19192e-50	Down	N_WCS417_30m-N_Control	RNC	AT3G19580	ZF2	Encodes zinc finger protein. mRNA levels are upregulated in response to ABA, high salt, and mild dessication. The protein is localized to the nucleus and acts as a transcriptional repressor.
Bnascaffold0027G0029900ZS	N_WCS417_30m	N_Control	12301.2	22013.8	17157.5	-0.839549	0.0550547	-15.2494	1.66208e-52	3.28321e-50	Normal	N_WCS417_30m-N_Control	RNC	--	--	--
BnaA05G0257500ZS	N_WCS417_30m	N_Control	2973.63	5933.62	4453.63	-0.996741	0.0653889	-15.2433	1.82477e-52	3.58943e-50	Normal	N_WCS417_30m-N_Control	RNC	--	--	--
BnaC03G0600600ZS	N_WCS417_30m	N_Control	1005.49	2561.24	1783.37	-1.34907	0.0885665	-15.2323	2.15809e-52	4.22733e-50	Down	N_WCS417_30m-N_Control	RNC	AT3G44260	CAF1a	Encodes one of the homologs of the yeast CCR4-associated factor 1: AT3G44260 (CAF1a), AT5G22250 (CAF1b). Has mRNA deadenylation activity. Also plays a role in plant defense responses.
BnaC07G0363400ZS	N_WCS417_30m	N_Control	2064.96	4493.68	3279.32	-1.12189	0.0736607	-15.2306	2.21612e-52	4.32291e-50	Down	N_WCS417_30m-N_Control	RNC	AT5G24660	LSU2	response to low sulfur 2
BnaA01G0026000ZS	N_WCS417_30m	N_Control	360.644	1340.25	850.446	-1.89384	0.124441	-15.2187	2.6575e-52	5.1624e-50	Down	N_WCS417_30m-N_Control	RNC	AT4G35940	--	--
Bnascaffold0027G0070900ZS	N_WCS417_30m	N_Control	17929.3	32464.5	25196.9	-0.856625	0.056316	-15.2111	2.98709e-52	5.77867e-50	Normal	N_WCS417_30m-N_Control	RNC	--	--	--
BnaA01G0244600ZS	N_WCS417_30m	N_Control	3224.97	6287.43	4756.2	-0.963052	0.0634687	-15.1736	5.28617e-52	1.01842e-49	Normal	N_WCS417_30m-N_Control	RNC	--	--	--
BnaA07G0364400ZS	N_WCS417_30m	N_Control	1264.33	320.878	792.604	1.97817	0.130433	15.1662	5.9234e-52	1.13652e-49	Up	N_WCS417_30m-N_Control	RNC	AT1G76790	IGMT5	O-methyltransferase family protein
Bnascaffold0026G0038600ZS	N_WCS417_30m	N_Control	4747.81	8716.42	6732.11	-0.876371	0.0578441	-15.1506	7.51045e-52	1.43514e-49	Normal	N_WCS417_30m-N_Control	RNC	--	--	--
BnaA06G0452000ZS	N_WCS417_30m	N_Control	637.816	56.6733	347.245	3.49884	0.231094	15.1403	8.78334e-52	1.67155e-49	Up	N_WCS417_30m-N_Control	RNC	AT4G38420	sks9	SKU5 similar 9
BnaC08G0251900ZS	N_WCS417_30m	N_Control	10.2873	458.782	234.535	-5.47211	0.362113	-15.1116	1.35821e-51	2.57433e-49	Down	N_WCS417_30m-N_Control	RNC	AT1G19210	ERF17	encodes a member of the DREB subfamily A-5 of ERF/AP2 transcription factor family. The protein contains one AP2 domain. There are 15 members in this subfamily including RAP2.1, RAP2.9 and RAP2.10.
BnaA05G0154200ZS	N_WCS417_30m	N_Control	3639.77	1564.76	2602.27	1.2174	0.0805757	15.1087	1.41812e-51	2.67705e-49	Up	N_WCS417_30m-N_Control	RNC	AT1G55450	--	S-adenosyl-L-methionine-dependent methyltransferases superfamily protein
BnaA05G0304200ZS	N_WCS417_30m	N_Control	15785.3	28387.7	22086.5	-0.846637	0.0560447	-15.1065	1.46821e-51	2.76047e-49	Normal	N_WCS417_30m-N_Control	RNC	--	--	--
Bnascaffold0230G0000400ZS	N_WCS417_30m	N_Control	4024.97	7471.08	5748.03	-0.892341	0.0590961	-15.0998	1.62368e-51	3.04057e-49	Normal	N_WCS417_30m-N_Control	RNC	--	--	--
BnaA05G0082000ZS	N_WCS417_30m	N_Control	4333.77	1946	3139.88	1.1546	0.0764914	15.0945	1.75893e-51	3.28072e-49	Up	N_WCS417_30m-N_Control	RNC	AT2G37040	PAL1	Encodes PAL1, a phenylalanine ammonia-lyase. Arabidopsis has four PALs: AT2G37040 (PAL1), AT3G53260 (PAL2), AT5G04230 (PAL3) and AT3G10340 (PAL4).
Bnascaffold0090G0000700ZS	N_WCS417_30m	N_Control	4535.81	8472.91	6504.36	-0.901504	0.0597604	-15.0853	2.0231e-51	3.75847e-49	Normal	N_WCS417_30m-N_Control	RNC	--	--	--
Bnascaffold0025G0031700ZS	N_WCS417_30m	N_Control	6748.28	12144.4	9446.35	-0.847709	0.0562146	-15.0799	2.19697e-51	4.06535e-49	Normal	N_WCS417_30m-N_Control	RNC	--	--	--
BnaA09G0446200ZS	N_WCS417_30m	N_Control	3114.15	1300.21	2207.18	1.26036	0.0836942	15.0591	3.00899e-51	5.54601e-49	Up	N_WCS417_30m-N_Control	RNC	AT1G27130	GSTU13	Encodes glutathione transferase belonging to the tau class of GSTs. Naming convention according to Wagner et al. (2002).
BnaA05G0227800ZS	N_WCS417_30m	N_Control	2268.17	5292.63	3780.4	-1.22275	0.081202	-15.0581	3.05224e-51	5.60368e-49	Down	N_WCS417_30m-N_Control	RNC	--	--	--
BnaA09G0343100ZS	N_WCS417_30m	N_Control	3643.66	6949.47	5296.57	-0.93154	0.0619214	-15.0439	3.78554e-51	6.92282e-49	Normal	N_WCS417_30m-N_Control	RNC	--	--	--
BnaA06G0204600ZS	N_WCS417_30m	N_Control	26142.9	46738.3	36440.6	-0.838139	0.0557488	-15.0342	4.38281e-51	7.98387e-49	Normal	N_WCS417_30m-N_Control	RNC	--	--	--
BnaA03G0019700ZS	N_WCS417_30m	N_Control	2021.8	698.436	1360.12	1.53397	0.102223	15.0062	6.68834e-51	1.21365e-48	Up	N_WCS417_30m-N_Control	RNC	AT5G05440	RCAR8	Encodes a member of the PYR (pyrabactin resistance )/PYL(PYR1-like)/RCAR (regulatory components of ABA receptor) family proteins with 14 members. PYR/PYL/RCAR family proteins function as abscisic acid sensors. Mediate ABA-dependent regulation of protein phosphatase 2Cs ABI1 and ABI2.
BnaC08G0358700ZS	N_WCS417_30m	N_Control	1402.24	3283.93	2343.09	-1.22798	0.081909	-14.9921	8.27444e-51	1.49566e-48	Down	N_WCS417_30m-N_Control	RNC	AT3G55980	TZF11	salt-inducible zinc finger 1
BnaC08G0089000ZS	N_WCS417_30m	N_Control	4083	7618.22	5850.61	-0.899726	0.0600146	-14.9918	8.30958e-51	1.49624e-48	Normal	N_WCS417_30m-N_Control	RNC	--	--	--
Bnascaffold0031G0000400ZS	N_WCS417_30m	N_Control	8007.26	14391.8	11199.5	-0.845775	0.0564405	-14.9852	9.1696e-51	1.64477e-48	Normal	N_WCS417_30m-N_Control	RNC	--	--	--
BnaA07G0002100ZS	N_WCS417_30m	N_Control	4822.5	2191.36	3506.93	1.13805	0.0759497	14.9842	9.31386e-51	1.66427e-48	Up	N_WCS417_30m-N_Control	RNC	AT5G48930	HCT	At5g48930 has been shown to encode for the hydroxycinnamoyl-Coenzyme A shikimate/quinate hydroxycinnamoyltransferase (HCT) both synthesizing and catabolizing the hydroxycinnamoylesters (coumaroyl/caffeoyl shikimate and quinate) involved in the phenylpropanoid pathway. Influence on the accumulation of flavonoids which in turn inhibit auxin transport and reduce plant growth.
Bnascaffold0066G0000400ZS	N_WCS417_30m	N_Control	5148.18	9389.86	7269.02	-0.867066	0.0579348	-14.9662	1.22048e-50	2.17255e-48	Normal	N_WCS417_30m-N_Control	RNC	--	--	--
BnaA05G0250500ZS	N_WCS417_30m	N_Control	3041.32	6136.25	4588.79	-1.01292	0.067721	-14.9573	1.39537e-50	2.47445e-48	Down	N_WCS417_30m-N_Control	RNC	--	--	--
BnaA01G0253400ZS	N_WCS417_30m	N_Control	5539.05	10014	7776.55	-0.854188	0.0571382	-14.9495	1.56922e-50	2.77225e-48	Normal	N_WCS417_30m-N_Control	RNC	--	--	--
BnaA10G0195600ZS	N_WCS417_30m	N_Control	367.496	1413.29	890.393	-1.94302	0.129981	-14.9485	1.5931e-50	2.80385e-48	Down	N_WCS417_30m-N_Control	RNC	AT3G03280	--	--
Bnascaffold0026G0032700ZS	N_WCS417_30m	N_Control	2245.3	4637.18	3441.24	-1.04627	0.0700625	-14.9333	1.99977e-50	3.50641e-48	Down	N_WCS417_30m-N_Control	RNC	--	--	--
BnaA05G0208800ZS	N_WCS417_30m	N_Control	2311.29	5088.68	3699.98	-1.13871	0.0764142	-14.9018	3.20755e-50	5.60316e-48	Down	N_WCS417_30m-N_Control	RNC	--	--	--
BnaA01G0255500ZS	N_WCS417_30m	N_Control	3688.66	7085.09	5386.87	-0.941674	0.063239	-14.8907	3.78689e-50	6.59059e-48	Normal	N_WCS417_30m-N_Control	RNC	--	--	--
BnaA05G0278300ZS	N_WCS417_30m	N_Control	4267.76	8247.97	6257.87	-0.950708	0.0638505	-14.8896	3.85139e-50	6.67802e-48	Normal	N_WCS417_30m-N_Control	RNC	--	--	--
BnaA05G0279400ZS	N_WCS417_30m	N_Control	3856.99	7318.9	5587.94	-0.924312	0.0620833	-14.8883	3.92849e-50	6.78657e-48	Normal	N_WCS417_30m-N_Control	RNC	--	--	--
BnaA05G0276700ZS	N_WCS417_30m	N_Control	3386.23	6553.06	4969.65	-0.952604	0.0639972	-14.8851	4.11904e-50	7.0896e-48	Normal	N_WCS417_30m-N_Control	RNC	--	--	--
Bnascaffold0066G0000100ZS	N_WCS417_30m	N_Control	5794.8	10681.1	8237.93	-0.882148	0.0592756	-14.8821	4.30531e-50	7.38305e-48	Normal	N_WCS417_30m-N_Control	RNC	--	--	--
BnaC08G0255600ZS	N_WCS417_30m	N_Control	3856.96	7217.15	5537.05	-0.903971	0.060751	-14.8799	4.4485e-50	7.60076e-48	Normal	N_WCS417_30m-N_Control	RNC	AT1G19800	TGD1	Encodes a permease-like protein involved in lipid transfer from the ER to the chloroplast, more specifically, transfer of phosphatidate across the chloroplast inner membrane. Mutant leaves accumulate trigalactosyldiacylglycerol, triacylglycerol and phosphatidate. Chloroplast lipids are altered in their fatty acid composition and as a consequence the development of chloroplasts in the mutants are …
BnaA09G0359300ZS	N_WCS417_30m	N_Control	3088.37	6815.36	4951.86	-1.14228	0.0767862	-14.8761	4.71359e-50	8.02441e-48	Down	N_WCS417_30m-N_Control	RNC	--	--	--
Bnascaffold1944G0000300ZS	N_WCS417_30m	N_Control	17598.8	31419.6	24509.2	-0.836171	0.0562157	-14.8743	4.83822e-50	8.20674e-48	Normal	N_WCS417_30m-N_Control	RNC	--	--	--
Bnascaffold0044G0000300ZS	N_WCS417_30m	N_Control	6163.54	11377.3	8770.4	-0.884279	0.059466	-14.8703	5.13536e-50	8.67931e-48	Normal	N_WCS417_30m-N_Control	RNC	--	--	--
Bnascaffold0198G0000400ZS	N_WCS417_30m	N_Control	11660.8	20562.8	16111.8	-0.818321	0.0550906	-14.8541	6.54364e-50	1.10197e-47	Normal	N_WCS417_30m-N_Control	RNC	--	--	--
BnaC06G0421900ZS	N_WCS417_30m	N_Control	20205.5	32846.7	26526.1	-0.701037	0.0472475	-14.8375	8.37651e-50	1.40557e-47	Normal	N_WCS417_30m-N_Control	RNC	AT1G76180	ERD14	Encodes a dehydrin protein whose expression is induced early on in response to dehydration stress. This gene's expression to cold occurs in two waves, with early induction occurring within 1 h and secondary induction occurring 5 h after the beginning of cold stress. Expression is also induced in response to ABA but not in response to 2,4-D, BA, and GA3. ERD14 protein is capable of binding Ca2+, e…
BnaA05G0257700ZS	N_WCS417_30m	N_Control	2353.48	4769.98	3561.73	-1.01909	0.0687267	-14.8282	9.62843e-50	1.60987e-47	Down	N_WCS417_30m-N_Control	RNC	--	--	--
BnaA06G0214900ZS	N_WCS417_30m	N_Control	1145.94	2814.04	1979.99	-1.29636	0.08743	-14.8275	9.7352e-50	1.62193e-47	Down	N_WCS417_30m-N_Control	RNC	--	--	--
BnaA06G0208500ZS	N_WCS417_30m	N_Control	5584.12	10878.6	8231.34	-0.961888	0.0648866	-14.8241	1.02284e-49	1.69806e-47	Normal	N_WCS417_30m-N_Control	RNC	--	--	--
BnaC07G0491700ZS	N_WCS417_30m	N_Control	308.228	1280.82	794.526	-2.05383	0.138833	-14.7936	1.61146e-49	2.6658e-47	Down	N_WCS417_30m-N_Control	RNC	AT4G29780	--	--
BnaA05G0258700ZS	N_WCS417_30m	N_Control	5441.1	10626.5	8033.79	-0.965762	0.0653275	-14.7834	1.87466e-49	3.09029e-47	Normal	N_WCS417_30m-N_Control	RNC	--	--	--
BnaA09G0406300ZS	N_WCS417_30m	N_Control	3577.06	1582.9	2579.98	1.17617	0.079641	14.7684	2.34351e-49	3.8496e-47	Up	N_WCS417_30m-N_Control	RNC	AT1G30730	AtBBE11	FAD-binding Berberine family protein
BnaA06G0205900ZS	N_WCS417_30m	N_Control	5641.45	10409.1	8025.29	-0.883525	0.0598409	-14.7646	2.4797e-49	4.05907e-47	Normal	N_WCS417_30m-N_Control	RNC	--	--	--
BnaC09G0101000ZS	N_WCS417_30m	N_Control	283.152	1150.61	716.883	-2.02232	0.137065	-14.7544	2.88147e-49	4.7003e-47	Down	N_WCS417_30m-N_Control	RNC	AT5G66400	RAB18	Belongs to the dehydrin protein family, which contains highly conserved stretches of 7-17 residues that are repetitively scattered in their sequences, the K-, S-, Y- and lysine rich segments. ABA- and drought-induced glycine-rice dehydrin protein. The ABA-induced expression of RAB18 was reduced following ACC application, indicating that ethylene inhibits the ABA signaling pathway. RAB18 is also e…
Bnascaffold0026G0024800ZS	N_WCS417_30m	N_Control	4826.83	9459.98	7143.4	-0.97082	0.0658208	-14.7495	3.1018e-49	5.04214e-47	Normal	N_WCS417_30m-N_Control	RNC	--	--	--
Bnascaffold0027G0033200ZS	N_WCS417_30m	N_Control	2799.24	5467.37	4133.31	-0.965862	0.0654916	-14.7479	3.17523e-49	5.14366e-47	Normal	N_WCS417_30m-N_Control	RNC	--	--	--
Bnascaffold0027G0053700ZS	N_WCS417_30m	N_Control	3032.87	5916.49	4474.68	-0.963939	0.0653672	-14.7465	3.23989e-49	5.2303e-47	Normal	N_WCS417_30m-N_Control	RNC	--	--	--
BnaA05G0278800ZS	N_WCS417_30m	N_Control	3294.79	6318.97	4806.88	-0.939513	0.0637274	-14.7427	3.42909e-49	5.51672e-47	Normal	N_WCS417_30m-N_Control	RNC	--	--	--
BnaA06G0250300ZS	N_WCS417_30m	N_Control	5109.04	9860.52	7484.78	-0.948513	0.0644531	-14.7163	5.06371e-49	8.11404e-47	Normal	N_WCS417_30m-N_Control	RNC	--	--	--
BnaA01G0068200ZS	N_WCS417_30m	N_Control	1645.08	510.798	1077.94	1.68644	0.1146	14.7159	5.09287e-49	8.11404e-47	Up	N_WCS417_30m-N_Control	RNC	AT4G30530	GGP1	Encodes a gamma-glutamyl peptidase, outside the GGT family, that can hydrolyze gamma-glutamyl peptide bonds.
BnaC09G0432800ZS	N_WCS417_30m	N_Control	963.784	2439.56	1701.67	-1.33975	0.0910406	-14.7159	5.09554e-49	8.11404e-47	Down	N_WCS417_30m-N_Control	RNC	AT5G59820	ZAT12	Encodes a zinc finger protein involved in high light and cold acclimation. Overexpression of this putative transcription factor increases the expression level of 9 cold-responsive genes and represses the expression level of 15 cold-responsive genes, including CBF genes. Also, lines overexpressing this gene exhibits a small but reproducible increase in freeze tolerance. Because of the repression o…
Bnascaffold0137G0000600ZS	N_WCS417_30m	N_Control	14551.9	25555.5	20053.7	-0.812395	0.0552563	-14.7023	6.23014e-49	9.88713e-47	Normal	N_WCS417_30m-N_Control	RNC	--	--	--
BnaA05G0272500ZS	N_WCS417_30m	N_Control	3265.67	6555.91	4910.79	-1.00567	0.0684514	-14.6917	7.28497e-49	1.15221e-46	Down	N_WCS417_30m-N_Control	RNC	--	--	--
BnaA05G0229900ZS	N_WCS417_30m	N_Control	10945.1	19373.2	15159.2	-0.823711	0.0560707	-14.6906	7.40773e-49	1.16768e-46	Normal	N_WCS417_30m-N_Control	RNC	--	--	--
BnaA06G0207700ZS	N_WCS417_30m	N_Control	5531.24	10379	7955.1	-0.90819	0.0618308	-14.6883	7.66073e-49	1.20351e-46	Normal	N_WCS417_30m-N_Control	RNC	--	--	--
Bnascaffold0039G0000400ZS	N_WCS417_30m	N_Control	5875.21	11097.6	8486.39	-0.917469	0.0625065	-14.678	8.92319e-49	1.39715e-46	Normal	N_WCS417_30m-N_Control	RNC	--	--	--
BnaA09G0348300ZS	N_WCS417_30m	N_Control	2140.32	4378.5	3259.41	-1.03257	0.0704409	-14.6586	1.18668e-48	1.85186e-46	Down	N_WCS417_30m-N_Control	RNC	--	--	--
BnaA05G0246300ZS	N_WCS417_30m	N_Control	2669.48	5269.18	3969.33	-0.980895	0.0670644	-14.6262	1.91295e-48	2.9753e-46	Normal	N_WCS417_30m-N_Control	RNC	--	--	--
BnaA05G0283900ZS	N_WCS417_30m	N_Control	3772.33	7751.45	5761.89	-1.03915	0.0711353	-14.6081	2.49252e-48	3.86391e-46	Down	N_WCS417_30m-N_Control	RNC	--	--	--
BnaC03G0025600ZS	N_WCS417_30m	N_Control	1775.46	598.143	1186.8	1.56929	0.107584	14.5866	3.41682e-48	5.27926e-46	Up	N_WCS417_30m-N_Control	RNC	AT5G05730	WEI2	ASA1 encodes the alpha subunit of anthranilate synthase, which catalyzes the rate-limiting step of tryptophan synthesis. ASA1 is induced by ethylene, and forms a link between ethylene signalling and auxin synthesis in roots.
BnaA01G0244900ZS	N_WCS417_30m	N_Control	5932.21	10718.2	8325.22	-0.85336	0.0585423	-14.5768	3.94494e-48	6.07521e-46	Normal	N_WCS417_30m-N_Control	RNC	--	--	--
Bnascaffold0025G0011700ZS	N_WCS417_30m	N_Control	3206.3	6183.87	4695.08	-0.947777	0.0650234	-14.5759	3.99576e-48	6.13329e-46	Normal	N_WCS417_30m-N_Control	RNC	--	--	--
Bnascaffold0025G0015300ZS	N_WCS417_30m	N_Control	3931.83	7459.87	5695.85	-0.92415	0.0634608	-14.5625	4.86297e-48	7.44002e-46	Normal	N_WCS417_30m-N_Control	RNC	--	--	--
BnaA05G0224400ZS	N_WCS417_30m	N_Control	3311.33	6268.37	4789.85	-0.920802	0.0632894	-14.5491	5.91943e-48	9.02684e-46	Normal	N_WCS417_30m-N_Control	RNC	--	--	--
BnaA03G0238000ZS	N_WCS417_30m	N_Control	569.589	50.26	309.925	3.4974	0.240549	14.5392	6.83468e-48	1.03887e-45	Up	N_WCS417_30m-N_Control	RNC	AT2G24850	TAT3	Encodes a tyrosine aminotransferase that is responsive to treatment with jasmonic acid.
Bnascaffold0084G0000700ZS	N_WCS417_30m	N_Control	4502.02	8221.44	6361.73	-0.868905	0.0598	-14.5302	7.80216e-48	1.18209e-45	Normal	N_WCS417_30m-N_Control	RNC	--	--	--
BnaC04G0174600ZS	N_WCS417_30m	N_Control	8839.47	4670.97	6755.22	0.920009	0.0633347	14.5261	8.27434e-48	1.24958e-45	Normal	N_WCS417_30m-N_Control	RNC	AT2G30490	REF3	Encodes a cinnamate-4-hydroxylase. Mutations in this gene impact phenylpropanoid metabolism, growth and development.
Bnascaffold0220G0000400ZS	N_WCS417_30m	N_Control	4109.1	7651.33	5880.22	-0.896814	0.0617444	-14.5246	8.46206e-48	1.27383e-45	Normal	N_WCS417_30m-N_Control	RNC	--	--	--
Bnascaffold0031G0000700ZS	N_WCS417_30m	N_Control	8490.07	15239	11864.5	-0.843819	0.0581326	-14.5154	9.67797e-48	1.45219e-45	Normal	N_WCS417_30m-N_Control	RNC	--	--	--
Bnascaffold3059G0000100ZS	N_WCS417_30m	N_Control	4901.58	8741.42	6821.5	-0.834712	0.057507	-14.515	9.74026e-48	1.45687e-45	Normal	N_WCS417_30m-N_Control	RNC	--	--	--
Bnascaffold0220G0000100ZS	N_WCS417_30m	N_Control	4561.87	8470.21	6516.04	-0.892669	0.0615956	-14.4924	1.35285e-47	2.01704e-45	Normal	N_WCS417_30m-N_Control	RNC	--	--	--
Bnascaffold2664G0000100ZS	N_WCS417_30m	N_Control	3643.17	6811.99	5227.58	-0.902811	0.062359	-14.4776	1.67778e-47	2.49356e-45	Normal	N_WCS417_30m-N_Control	RNC	--	--	--
BnaA05G0236100ZS	N_WCS417_30m	N_Control	2181.68	4608.42	3395.05	-1.07905	0.0745513	-14.4739	1.77052e-47	2.61693e-45	Down	N_WCS417_30m-N_Control	RNC	--	--	--
BnaA09G0321000ZS	N_WCS417_30m	N_Control	2599.74	5310.33	3955.04	-1.03073	0.0712129	-14.4739	1.77198e-47	2.61693e-45	Down	N_WCS417_30m-N_Control	RNC	--	--	--
Bnascaffold0084G0000400ZS	N_WCS417_30m	N_Control	4367.87	7992.75	6180.31	-0.871672	0.0602546	-14.4665	1.97325e-47	2.90503e-45	Normal	N_WCS417_30m-N_Control	RNC	--	--	--
BnaA09G0358100ZS	N_WCS417_30m	N_Control	1784.11	3848.27	2816.19	-1.10921	0.0767449	-14.4532	2.39355e-47	3.51274e-45	Down	N_WCS417_30m-N_Control	RNC	--	--	--
BnaA05G0245000ZS	N_WCS417_30m	N_Control	2812.09	5926.35	4369.22	-1.07586	0.0744665	-14.4475	2.59898e-47	3.80231e-45	Down	N_WCS417_30m-N_Control	RNC	--	--	--
Bnascaffold0027G0070400ZS	N_WCS417_30m	N_Control	2784.57	5556.55	4170.56	-0.996794	0.0693493	-14.3735	7.58724e-47	1.10656e-44	Normal	N_WCS417_30m-N_Control	RNC	--	--	--
BnaA05G0227300ZS	N_WCS417_30m	N_Control	1605.01	3457.96	2531.48	-1.10726	0.077058	-14.3691	8.08509e-47	1.1755e-44	Down	N_WCS417_30m-N_Control	RNC	--	--	--
BnaA01G0240700ZS	N_WCS417_30m	N_Control	2603.26	5095.47	3849.37	-0.96889	0.0674533	-14.3639	8.72155e-47	1.26411e-44	Normal	N_WCS417_30m-N_Control	RNC	--	--	--
BnaA05G0220700ZS	N_WCS417_30m	N_Control	292.875	1164.19	728.53	-1.99193	0.138694	-14.3621	8.95027e-47	1.29326e-44	Down	N_WCS417_30m-N_Control	RNC	--	--	--
BnaC03G0259200ZS	N_WCS417_30m	N_Control	2138.78	802.731	1470.75	1.41336	0.0985362	14.3436	1.1691e-46	1.68408e-44	Up	N_WCS417_30m-N_Control	RNC	AT2G45300	--	encodes 3-phosphoshikimate 1-carboxyvinyltransferase / 5-enolpyruvylshikimate-3-phosphate / EPSP synthase involved in chorismate biosynthesis
BnaA06G0206900ZS	N_WCS417_30m	N_Control	9727.12	16900.1	13313.6	-0.796831	0.0556026	-14.3308	1.40472e-46	2.01729e-44	Normal	N_WCS417_30m-N_Control	RNC	--	--	--
BnaA09G0323300ZS	N_WCS417_30m	N_Control	2100.82	4280.59	3190.7	-1.02699	0.0719026	-14.2831	2.79093e-46	3.99572e-44	Down	N_WCS417_30m-N_Control	RNC	--	--	--
Bnascaffold0170G0000100ZS	N_WCS417_30m	N_Control	4641.32	8616.21	6628.77	-0.892392	0.0625683	-14.2627	3.73833e-46	5.33579e-44	Normal	N_WCS417_30m-N_Control	RNC	--	--	--
BnaA06G0214500ZS	N_WCS417_30m	N_Control	2119.77	4269	3194.39	-1.00994	0.0708335	-14.2579	4.00143e-46	5.69395e-44	Down	N_WCS417_30m-N_Control	RNC	--	--	--
BnaC06G0127100ZS	N_WCS417_30m	N_Control	1269.43	315.005	792.219	2.00874	0.140984	14.248	4.61291e-46	6.54418e-44	Up	N_WCS417_30m-N_Control	RNC	AT1G53210	NCL	Encodes a Na+/Ca 2+ exchanger-like protein that participates in the maintenance of Ca 2+ homeostasis.
Bnascaffold1071G0000300ZS	N_WCS417_30m	N_Control	3768.66	6931.94	5350.3	-0.879141	0.0617869	-14.2286	6.08957e-46	8.61297e-44	Normal	N_WCS417_30m-N_Control	RNC	--	--	--
BnaA05G0162700ZS	N_WCS417_30m	N_Control	1542.09	501.626	1021.86	1.62027	0.114059	14.2055	8.46739e-46	1.194e-43	Up	N_WCS417_30m-N_Control	RNC	AT1G53210	NCL	Encodes a Na+/Ca 2+ exchanger-like protein that participates in the maintenance of Ca 2+ homeostasis.
BnaC06G0221400ZS	N_WCS417_30m	N_Control	124.898	726.67	425.784	-2.53971	0.178885	-14.1975	9.49827e-46	1.33535e-43	Down	N_WCS417_30m-N_Control	RNC	AT3G59900	ARGOS	Encodes ARGOS (Auxin-Regulated Gene Involved in Organ Size). Inducible by auxin. Involved in lateral organ size control. Transgenic plants expressing sense or antisense ARGOS cDNA display enlarged or reduced aerial organs, respectively. The alteration in organ size is attributable mainly to changes in cell number and the duration of organ growth.
Bnascaffold0060G0000700ZS	N_WCS417_30m	N_Control	4107.49	7438.13	5772.81	-0.856682	0.0603939	-14.1849	1.13623e-45	1.59262e-43	Normal	N_WCS417_30m-N_Control	RNC	--	--	--
BnaC03G0341700ZS	N_WCS417_30m	N_Control	2492.83	1025.91	1759.37	1.28077	0.0903387	14.1774	1.26416e-45	1.76666e-43	Up	N_WCS417_30m-N_Control	RNC	AT3G01290	HIR2	SPFH/Band 7/PHB domain-containing membrane-associated protein family
BnaC08G0286600ZS	N_WCS417_30m	N_Control	736.013	118.565	427.289	2.63639	0.186057	14.1698	1.40896e-45	1.96315e-43	Up	N_WCS417_30m-N_Control	RNC	AT5G08640	FLS1	Encodes a flavonol synthase that catalyzes formation of flavonols from dihydroflavonols. Co-expressed with CHI and CHS (qRT-PCR).
BnaA09G0347900ZS	N_WCS417_30m	N_Control	2096.92	4463.46	3280.19	-1.09007	0.0769842	-14.1596	1.62918e-45	2.26326e-43	Down	N_WCS417_30m-N_Control	RNC	--	--	--
Bnascaffold0517G0000600ZS	N_WCS417_30m	N_Control	11802	20503.3	16152.7	-0.796779	0.0562907	-14.1547	1.7464e-45	2.41891e-43	Normal	N_WCS417_30m-N_Control	RNC	--	--	--
Bnascaffold0034G0000500ZS	N_WCS417_30m	N_Control	7477.13	13123.7	10300.4	-0.811584	0.057433	-14.131	2.44771e-45	3.38029e-43	Normal	N_WCS417_30m-N_Control	RNC	--	--	--
BnaC08G0004100ZS	N_WCS417_30m	N_Control	5810.04	3108.12	4459.08	0.902465	0.0639429	14.1136	3.13172e-45	4.31219e-43	Normal	N_WCS417_30m-N_Control	RNC	AT1G03220	SAP2	Eukaryotic aspartyl protease family protein
BnaA08G0166400ZS	N_WCS417_30m	N_Control	1040.36	2531.54	1785.95	-1.28328	0.0909642	-14.1076	3.4109e-45	4.68284e-43	Down	N_WCS417_30m-N_Control	RNC	AT4G27657	--	--
Bnascaffold0026G0038800ZS	N_WCS417_30m	N_Control	1650.59	3487.14	2568.87	-1.0791	0.0765239	-14.1015	3.7193e-45	5.09131e-43	Down	N_WCS417_30m-N_Control	RNC	--	--	--
BnaA09G0334200ZS	N_WCS417_30m	N_Control	2868.42	5655.46	4261.94	-0.979636	0.0695303	-14.0893	4.41711e-45	6.0289e-43	Normal	N_WCS417_30m-N_Control	RNC	--	--	--
Bnascaffold0027G0039600ZS	N_WCS417_30m	N_Control	1387.68	322.755	855.217	2.10192	0.149193	14.0886	4.46492e-45	6.07644e-43	Up	N_WCS417_30m-N_Control	RNC	AT1G80920	Toc12	A nuclear encoded soluble protein found in the chloroplast stroma. Negatively regulated by light and has rapid turnover in darkness.
BnaA06G0208400ZS	N_WCS417_30m	N_Control	6794.68	11672	9233.32	-0.780587	0.055531	-14.0568	7.00063e-45	9.49976e-43	Normal	N_WCS417_30m-N_Control	RNC	--	--	--
BnaA02G0239900ZS	N_WCS417_30m	N_Control	972.399	211.84	592.12	2.1983	0.156402	14.0554	7.13975e-45	9.66054e-43	Up	N_WCS417_30m-N_Control	RNC	AT1G80820	CCR2	Encodes an cinnamoyl CoA reductase isoform. Involved in lignin biosynthesis.
Bnascaffold0047G0000100ZS	N_WCS417_30m	N_Control	5939.08	11078.8	8508.96	-0.899331	0.064003	-14.0514	7.55397e-45	1.01915e-42	Normal	N_WCS417_30m-N_Control	RNC	--	--	--
BnaA07G0222800ZS	N_WCS417_30m	N_Control	6868.46	3710.84	5289.65	0.88849	0.06326	14.045	8.26127e-45	1.11138e-42	Normal	N_WCS417_30m-N_Control	RNC	AT1G59870	PEN3	ATP binding cassette transporter. Localized to the plasma membrane in uninfected cells. In infected leaves, the protein concentrated at infection sites. Contributes to nonhost resistance to inappropriate pathogens that enter by direct penetration in a salicylic acid鈥揹ependent manner. Required for mlo resistance. Has Cd transporter activity (Cd2+ extrusion pump) and contributes to heavy metal resi…
BnaA05G0220200ZS	N_WCS417_30m	N_Control	1547.75	3386.71	2467.23	-1.12993	0.0805119	-14.0343	9.61198e-45	1.28938e-42	Down	N_WCS417_30m-N_Control	RNC	--	--	--
Bnascaffold0027G0051000ZS	N_WCS417_30m	N_Control	3732.33	7102.61	5417.47	-0.928076	0.0661425	-14.0315	1.00063e-44	1.33844e-42	Normal	N_WCS417_30m-N_Control	RNC	--	--	--
Bnascaffold0027G0051300ZS	N_WCS417_30m	N_Control	3225.64	6078.14	4651.89	-0.913936	0.0651415	-14.03	1.02146e-44	1.36241e-42	Normal	N_WCS417_30m-N_Control	RNC	--	--	--
BnaA06G0208300ZS	N_WCS417_30m	N_Control	4209.53	7650.64	5930.09	-0.861966	0.0614644	-14.0238	1.11443e-44	1.4822e-42	Normal	N_WCS417_30m-N_Control	RNC	--	--	--
BnaC08G0086200ZS	N_WCS417_30m	N_Control	4264.54	7633.85	5949.2	-0.840125	0.0599091	-14.0233	1.12201e-44	1.48805e-42	Normal	N_WCS417_30m-N_Control	RNC	--	--	--
Bnascaffold2179G0000100ZS	N_WCS417_30m	N_Control	5338.68	9626.42	7482.55	-0.850399	0.0607751	-13.9926	1.73064e-44	2.28874e-42	Normal	N_WCS417_30m-N_Control	RNC	--	--	--
BnaC01G0457500ZS	N_WCS417_30m	N_Control	2242.98	887.859	1565.42	1.33737	0.0956431	13.9829	1.98166e-44	2.61333e-42	Up	N_WCS417_30m-N_Control	RNC	AT3G12580	HSP70-4	heat shock protein 70
BnaC02G0166900ZS	N_WCS417_30m	N_Control	1591.55	3486.96	2539.25	-1.13187	0.0809712	-13.9787	2.10297e-44	2.76553e-42	Down	N_WCS417_30m-N_Control	RNC	AT4G27270	--	Quinone reductase family protein
Bnascaffold0553G0000400ZS	N_WCS417_30m	N_Control	2144.93	4369.25	3257.09	-1.02652	0.0734825	-13.9696	2.39043e-44	3.13474e-42	Down	N_WCS417_30m-N_Control	RNC	--	--	--
BnaC08G0089300ZS	N_WCS417_30m	N_Control	2878.22	5489.09	4183.65	-0.931293	0.0666701	-13.9687	2.42066e-44	3.16552e-42	Normal	N_WCS417_30m-N_Control	RNC	--	--	--
BnaA02G0314600ZS	N_WCS417_30m	N_Control	919.91	203.536	561.723	2.17516	0.155868	13.9551	2.92699e-44	3.81699e-42	Up	N_WCS417_30m-N_Control	RNC	AT2G01450	MPK17	member of MAP Kinase
Bnascaffold2207G0000300ZS	N_WCS417_30m	N_Control	3646.58	6673.94	5160.26	-0.871902	0.0624945	-13.9516	3.07417e-44	3.99778e-42	Normal	N_WCS417_30m-N_Control	RNC	--	--	--
Bnascaffold0044G0000600ZS	N_WCS417_30m	N_Control	5579.5	10860.7	8220.09	-0.961051	0.0688897	-13.9506	3.12054e-44	4.03713e-42	Normal	N_WCS417_30m-N_Control	RNC	--	--	--
BnaA07G0358600ZS	N_WCS417_30m	N_Control	20464.8	33609.2	27037	-0.715783	0.0513086	-13.9506	3.12167e-44	4.03713e-42	Normal	N_WCS417_30m-N_Control	RNC	AT1G76180	ERD14	Encodes a dehydrin protein whose expression is induced early on in response to dehydration stress. This gene's expression to cold occurs in two waves, with early induction occurring within 1 h and secondary induction occurring 5 h after the beginning of cold stress. Expression is also induced in response to ABA but not in response to 2,4-D, BA, and GA3. ERD14 protein is capable of binding Ca2+, e…
BnaA09G0367400ZS	N_WCS417_30m	N_Control	2730.3	5243.45	3986.88	-0.941609	0.0675611	-13.9371	3.76728e-44	4.85865e-42	Normal	N_WCS417_30m-N_Control	RNC	--	--	--
BnaA09G0283700ZS	N_WCS417_30m	N_Control	1459.3	3208.88	2334.09	-1.13709	0.0816105	-13.9332	3.98234e-44	5.1219e-42	Down	N_WCS417_30m-N_Control	RNC	--	--	--
BnaA01G0263200ZS	N_WCS417_30m	N_Control	1017.28	242.718	629.999	2.06664	0.148357	13.9302	4.15248e-44	5.3261e-42	Up	N_WCS417_30m-N_Control	RNC	AT5G02500	HSP70-1	--
Bnascaffold0087G0000500ZS	N_WCS417_30m	N_Control	12879.5	22083.3	17481.4	-0.777935	0.055877	-13.9223	4.63803e-44	5.93262e-42	Normal	N_WCS417_30m-N_Control	RNC	--	--	--
BnaA02G0088000ZS	N_WCS417_30m	N_Control	2920	1239.88	2079.94	1.23523	0.0887635	13.9159	5.07029e-44	6.46787e-42	Up	N_WCS417_30m-N_Control	RNC	AT5G21090	--	Leucine-rich repeat (LRR) family protein
BnaA01G0237100ZS	N_WCS417_30m	N_Control	2800.48	5817.27	4308.88	-1.05505	0.0758274	-13.9138	5.22435e-44	6.64628e-42	Down	N_WCS417_30m-N_Control	RNC	--	--	--
Bnascaffold0027G0066300ZS	N_WCS417_30m	N_Control	3608.38	6606.6	5107.49	-0.8726	0.0627214	-13.9123	5.33289e-44	6.76597e-42	Normal	N_WCS417_30m-N_Control	RNC	--	--	--
Bnascaffold0039G0000100ZS	N_WCS417_30m	N_Control	6972.85	12575.1	9773.99	-0.850653	0.0611791	-13.9043	5.96354e-44	7.54566e-42	Normal	N_WCS417_30m-N_Control	RNC	--	--	--
Bnascaffold0025G0032300ZS	N_WCS417_30m	N_Control	3242.8	6588.66	4915.73	-1.02263	0.0736388	-13.8871	7.58083e-44	9.56615e-42	Down	N_WCS417_30m-N_Control	RNC	--	--	--
BnaA06G0249900ZS	N_WCS417_30m	N_Control	4288.49	8517.78	6403.14	-0.989712	0.0713311	-13.8749	8.99207e-44	1.13165e-41	Normal	N_WCS417_30m-N_Control	RNC	--	--	--
Bnascaffold0027G0057000ZS	N_WCS417_30m	N_Control	291.019	1100.16	695.59	-1.91912	0.138628	-13.8436	1.38994e-43	1.74455e-41	Down	N_WCS417_30m-N_Control	RNC	AT1G03220	SAP2	Eukaryotic aspartyl protease family protein
BnaC08G0088800ZS	N_WCS417_30m	N_Control	3348.03	6234.6	4791.32	-0.89691	0.0648046	-13.8402	1.45756e-43	1.82453e-41	Normal	N_WCS417_30m-N_Control	RNC	--	--	--
BnaA09G0366500ZS	N_WCS417_30m	N_Control	2039.79	4092.5	3066.14	-1.00447	0.0725834	-13.8389	1.4854e-43	1.85442e-41	Down	N_WCS417_30m-N_Control	RNC	--	--	--
Bnascaffold0027G0070200ZS	N_WCS417_30m	N_Control	2817.26	5324.81	4071.04	-0.918293	0.0664029	-13.8291	1.70119e-43	2.11816e-41	Normal	N_WCS417_30m-N_Control	RNC	--	--	--
BnaC02G0116000ZS	N_WCS417_30m	N_Control	809.621	2089.25	1449.44	-1.368	0.0990027	-13.8178	1.99038e-43	2.47166e-41	Down	N_WCS417_30m-N_Control	RNC	AT5G60800	HIPP3	Heavy metal transport/detoxification superfamily protein
BnaA09G0664000ZS	N_WCS417_30m	N_Control	3405.3	1612.43	2508.87	1.07839	0.078098	13.8081	2.27668e-43	2.81972e-41	Up	N_WCS417_30m-N_Control	RNC	AT1G08930	ERD6	encodes a putative sucrose transporter whose gene expression is induced by dehydration and cold.
BnaA09G0358900ZS	N_WCS417_30m	N_Control	1494.87	3341.87	2418.37	-1.16099	0.0840927	-13.8061	2.34265e-43	2.88825e-41	Down	N_WCS417_30m-N_Control	RNC	--	--	--
BnaA05G0280400ZS	N_WCS417_30m	N_Control	2732.97	5524.6	4128.79	-1.01506	0.0735232	-13.806	2.34436e-43	2.88825e-41	Down	N_WCS417_30m-N_Control	RNC	--	--	--
BnaA06G0129600ZS	N_WCS417_30m	N_Control	848.884	2129.42	1489.15	-1.32655	0.0961513	-13.7964	2.67736e-43	3.28985e-41	Down	N_WCS417_30m-N_Control	RNC	AT1G18740	B1L	Protein of unknown function (DUF793)
BnaA09G0356500ZS	N_WCS417_30m	N_Control	2626.07	4974.16	3800.11	-0.921587	0.0668095	-13.7943	2.7599e-43	3.3824e-41	Normal	N_WCS417_30m-N_Control	RNC	--	--	--
BnaA10G0153200ZS	N_WCS417_30m	N_Control	585.14	1664.38	1124.76	-1.50853	0.109379	-13.7917	2.85842e-43	3.49399e-41	Down	N_WCS417_30m-N_Control	RNC	AT5G59820	ZAT12	Encodes a zinc finger protein involved in high light and cold acclimation. Overexpression of this putative transcription factor increases the expression level of 9 cold-responsive genes and represses the expression level of 15 cold-responsive genes, including CBF genes. Also, lines overexpressing this gene exhibits a small but reproducible increase in freeze tolerance. Because of the repression o…
BnaA09G0368700ZS	N_WCS417_30m	N_Control	2236.1	4424.76	3330.43	-0.98482	0.0715136	-13.7711	3.80412e-43	4.63786e-41	Normal	N_WCS417_30m-N_Control	RNC	--	--	--
BnaA08G0257600ZS	N_WCS417_30m	N_Control	510.402	1570.27	1040.34	-1.6209	0.117755	-13.765	4.13877e-43	5.03274e-41	Down	N_WCS417_30m-N_Control	RNC	AT1G18300	NUDT4	nudix hydrolase homolog 4
BnaA09G0700200ZS	N_WCS417_30m	N_Control	286.596	1069.86	678.227	-1.9009	0.138435	-13.7313	6.59137e-43	7.99434e-41	Down	N_WCS417_30m-N_Control	RNC	AT1G03220	SAP2	Eukaryotic aspartyl protease family protein
BnaA06G0214300ZS	N_WCS417_30m	N_Control	2035.22	4132.93	3084.08	-1.02173	0.0744329	-13.7269	7.01033e-43	8.48051e-41	Down	N_WCS417_30m-N_Control	RNC	--	--	--
BnaA05G0279700ZS	N_WCS417_30m	N_Control	3795.71	7231.55	5513.63	-0.929879	0.0677591	-13.7233	7.36261e-43	8.8837e-41	Normal	N_WCS417_30m-N_Control	RNC	--	--	--
BnaC08G0086000ZS	N_WCS417_30m	N_Control	2892.04	5464.09	4178.07	-0.917828	0.0668881	-13.7219	7.51162e-43	9.0402e-41	Normal	N_WCS417_30m-N_Control	RNC	--	--	--
BnaA01G0246200ZS	N_WCS417_30m	N_Control	4038.98	7270.65	5654.81	-0.847992	0.0618448	-13.7116	8.65094e-43	1.03847e-40	Normal	N_WCS417_30m-N_Control	RNC	--	--	--
BnaA04G0051400ZS	N_WCS417_30m	N_Control	1283.64	372.816	828.229	1.78251	0.130047	13.7066	9.26614e-43	1.10947e-40	Up	N_WCS417_30m-N_Control	RNC	AT3G54020	AtIPCS1	Inositol phosphorylceramide synthase
BnaA05G0236800ZS	N_WCS417_30m	N_Control	1516.13	3257.03	2386.58	-1.1034	0.0805076	-13.7055	9.40757e-43	1.12353e-40	Down	N_WCS417_30m-N_Control	RNC	--	--	--
BnaA01G0238400ZS	N_WCS417_30m	N_Control	2552.2	4969.09	3760.65	-0.960995	0.0701339	-13.7023	9.83711e-43	1.17184e-40	Normal	N_WCS417_30m-N_Control	RNC	--	--	--
BnaA04G0175400ZS	N_WCS417_30m	N_Control	1335.37	2958.52	2146.94	-1.14742	0.0837439	-13.7016	9.93614e-43	1.18064e-40	Down	N_WCS417_30m-N_Control	RNC	AT2G27080	NHL13	Late embryogenesis abundant (LEA) hydroxyproline-rich glycoprotein family
Bnascaffold0027G0066100ZS	N_WCS417_30m	N_Control	5147.72	10111.4	7629.57	-0.974237	0.071113	-13.6998	1.01744e-42	1.20589e-40	Normal	N_WCS417_30m-N_Control	RNC	--	--	--
BnaA09G0369400ZS	N_WCS417_30m	N_Control	2601.75	4934.45	3768.1	-0.923304	0.0674003	-13.6988	1.03209e-42	1.22016e-40	Normal	N_WCS417_30m-N_Control	RNC	--	--	--
BnaC08G0087100ZS	N_WCS417_30m	N_Control	4295.41	7719.57	6007.49	-0.845559	0.0617367	-13.6962	1.06938e-42	1.26106e-40	Normal	N_WCS417_30m-N_Control	RNC	--	--	--
BnaC03G0237200ZS	N_WCS417_30m	N_Control	2475.72	1041.85	1758.78	1.24885	0.0911927	13.6947	1.09265e-42	1.28269e-40	Up	N_WCS417_30m-N_Control	RNC	AT2G27030	CAM5	encodes a calmodulin that has higher affinity to kinesin-like calmodulin binding motor protein than CAM4 or CAM6.
BnaA05G0281200ZS	N_WCS417_30m	N_Control	2423.57	4781.15	3602.36	-0.979974	0.071559	-13.6946	1.0932e-42	1.28269e-40	Normal	N_WCS417_30m-N_Control	RNC	--	--	--
BnaC02G0112600ZS	N_WCS417_30m	N_Control	1265.35	362.933	814.143	1.80233	0.131655	13.6898	1.16865e-42	1.36778e-40	Up	N_WCS417_30m-N_Control	RNC	AT5G22630	ADT5	Encodes a plastid-localized arogenate dehydratase involved in phenylalanine biosynthesis. Not less than six genes encoding ADT were identi&#64257;ed in the Arabidopsis genome: ADT1 [At1g11790]; ADT2 [At3g07630]; ADT3 [At2g27820]; ADT4 [At3g44720]; ADT5 [At5g22630]; and ADT6 [At1g08250].
BnaA04G0196800ZS	N_WCS417_30m	N_Control	1235.35	363.431	799.388	1.76496	0.128956	13.6865	1.22214e-42	1.42682e-40	Up	N_WCS417_30m-N_Control	RNC	AT2G30490	REF3	Encodes a cinnamate-4-hydroxylase. Mutations in this gene impact phenylpropanoid metabolism, growth and development.
Bnascaffold0026G0032900ZS	N_WCS417_30m	N_Control	2257.22	4430.85	3344.03	-0.972977	0.0711001	-13.6846	1.25472e-42	1.46122e-40	Normal	N_WCS417_30m-N_Control	RNC	--	--	--
Bnascaffold0027G0062100ZS	N_WCS417_30m	N_Control	285.313	1064.72	675.016	-1.90045	0.138879	-13.6842	1.26107e-42	1.46496e-40	Down	N_WCS417_30m-N_Control	RNC	AT1G03220	SAP2	Eukaryotic aspartyl protease family protein
BnaC09G0369200ZS	N_WCS417_30m	N_Control	1951.55	3927.47	2939.51	-1.00893	0.0738166	-13.668	1.57617e-42	1.82648e-40	Down	N_WCS417_30m-N_Control	RNC	AT4G27270	--	Quinone reductase family protein
BnaA06G0015600ZS	N_WCS417_30m	N_Control	551.602	61.6358	306.619	3.15845	0.231112	13.6663	1.61303e-42	1.86458e-40	Up	N_WCS417_30m-N_Control	RNC	AT3G15450	--	Aluminium induced protein with YGL and LRDR motifs
BnaA05G0220400ZS	N_WCS417_30m	N_Control	1793.5	3679.74	2736.62	-1.03696	0.0758884	-13.6642	1.66091e-42	1.9152e-40	Down	N_WCS417_30m-N_Control	RNC	--	--	--
BnaC01G0218300ZS	N_WCS417_30m	N_Control	42.3385	452.888	247.613	-3.42047	0.250332	-13.6637	1.67205e-42	1.92331e-40	Down	N_WCS417_30m-N_Control	RNC	AT4G27657	--	--
BnaC08G0272200ZS	N_WCS417_30m	N_Control	1357.29	386.034	871.663	1.81567	0.132888	13.6632	1.68532e-42	1.93383e-40	Up	N_WCS417_30m-N_Control	RNC	AT1G22410	--	Class-II DAHP synthetase family protein
BnaC08G0085800ZS	N_WCS417_30m	N_Control	3234.45	5959.39	4596.92	-0.88161	0.0646843	-13.6294	2.67646e-42	3.06359e-40	Normal	N_WCS417_30m-N_Control	RNC	--	--	--
BnaA04G0298800ZS	N_WCS417_30m	N_Control	575.411	1614.83	1095.12	-1.489	0.109255	-13.6286	2.70772e-42	3.09183e-40	Down	N_WCS417_30m-N_Control	RNC	AT2G47520	HRE2	encodes a member of the ERF (ethylene response factor) subfamily B-2 of ERF/AP2 transcription factor family. The protein contains one AP2 domain. There are 5 members in this subfamily including RAP2.2 AND RAP2.12.
BnaA06G0085600ZS	N_WCS417_30m	N_Control	820.856	153.14	486.998	2.41934	0.177586	13.6235	2.90338e-42	3.30716e-40	Up	N_WCS417_30m-N_Control	RNC	AT1G11960	OSCA1.3	ERD (early-responsive to dehydration stress) family protein
BnaA09G0327300ZS	N_WCS417_30m	N_Control	3615.06	6876.1	5245.58	-0.927713	0.0681901	-13.6048	3.74922e-42	4.26027e-40	Normal	N_WCS417_30m-N_Control	RNC	--	--	--
BnaA03G0411500ZS	N_WCS417_30m	N_Control	691.71	1843.27	1267.49	-1.4137	0.103959	-13.5986	4.08016e-42	4.6251e-40	Down	N_WCS417_30m-N_Control	RNC	AT5G61600	ERF104	encodes a member of the ERF (ethylene response factor) subfamily B-3 of ERF/AP2 transcription factor family. The protein contains one AP2 domain. There are 18 members in this subfamily including ATERF-1, ATERF-2, AND ATERF-5.
BnaC04G0438600ZS	N_WCS417_30m	N_Control	749.215	1938.94	1344.08	-1.37217	0.101044	-13.5799	5.26946e-42	5.95882e-40	Down	N_WCS417_30m-N_Control	RNC	AT2G22500	UCP5	Encodes one of the mitochondrial dicarboxylate carriers (DIC): DIC1 (AT2G22500), DIC2 (AT4G24570), DIC3 (AT5G09470).
BnaA09G0370600ZS	N_WCS417_30m	N_Control	2108.49	4146.32	3127.4	-0.975674	0.0719221	-13.5657	6.39575e-42	7.21502e-40	Normal	N_WCS417_30m-N_Control	RNC	--	--	--
BnaA05G0298300ZS	N_WCS417_30m	N_Control	2198.88	4281.45	3240.16	-0.961347	0.0709	-13.5592	6.99024e-42	7.86671e-40	Normal	N_WCS417_30m-N_Control	RNC	--	--	--
BnaC03G0256800ZS	N_WCS417_30m	N_Control	3059.59	1375.39	2217.49	1.15307	0.0850851	13.552	7.71053e-42	8.6565e-40	Up	N_WCS417_30m-N_Control	RNC	AT2G44790	UCC2	Encodes a uclacyanin, a protein precursor that is closely related to precursors of stellacyanins and a blue copper protein from pea pods.
BnaC06G0240100ZS	N_WCS417_30m	N_Control	8636.5	4960.87	6798.68	0.799841	0.0590213	13.5517	7.73891e-42	8.66758e-40	Normal	N_WCS417_30m-N_Control	RNC	AT1G59870	PEN3	ATP binding cassette transporter. Localized to the plasma membrane in uninfected cells. In infected leaves, the protein concentrated at infection sites. Contributes to nonhost resistance to inappropriate pathogens that enter by direct penetration in a salicylic acid鈥揹ependent manner. Required for mlo resistance. Has Cd transporter activity (Cd2+ extrusion pump) and contributes to heavy metal resi…
BnaC09G0295000ZS	N_WCS417_30m	N_Control	863.893	2279.11	1571.5	-1.40021	0.103327	-13.5512	7.79248e-42	8.70674e-40	Down	N_WCS417_30m-N_Control	RNC	AT4G11280	ATACS6	encodes a a member of the 1-aminocyclopropane-1-carboxylate (ACC) synthase (S-adenosyl-L-methionine methylthioadenosine-lyase, EC 4.4.1.14) gene family
BnaA07G0035500ZS	N_WCS417_30m	N_Control	1214.99	361.959	788.473	1.74727	0.128952	13.5498	7.94973e-42	8.8613e-40	Up	N_WCS417_30m-N_Control	RNC	AT3G44840	--	S-adenosyl-L-methionine-dependent methyltransferases superfamily protein
BnaC08G0244800ZS	N_WCS417_30m	N_Control	209.612	952.133	580.872	-2.18413	0.161312	-13.5398	9.10542e-42	1.01254e-39	Down	N_WCS417_30m-N_Control	RNC	AT1G18300	NUDT4	nudix hydrolase homolog 4
BnaC03G0114800ZS	N_WCS417_30m	N_Control	641.086	1733.6	1187.34	-1.43555	0.106282	-13.507	1.42219e-41	1.57776e-39	Down	N_WCS417_30m-N_Control	RNC	AT5G59820	ZAT12	Encodes a zinc finger protein involved in high light and cold acclimation. Overexpression of this putative transcription factor increases the expression level of 9 cold-responsive genes and represses the expression level of 15 cold-responsive genes, including CBF genes. Also, lines overexpressing this gene exhibits a small but reproducible increase in freeze tolerance. Because of the repression o…
BnaA03G0594400ZS	N_WCS417_30m	N_Control	10830.2	18557.4	14693.8	-0.776868	0.057636	-13.4789	2.0826e-41	2.30494e-39	Normal	N_WCS417_30m-N_Control	RNC	--	--	--
BnaA01G0167100ZS	N_WCS417_30m	N_Control	615.697	1664.72	1140.21	-1.43512	0.106598	-13.4629	2.58442e-41	2.85359e-39	Down	N_WCS417_30m-N_Control	RNC	AT4G27430	CIP7	Positive regulator of light-regulated genes. Novel nuclear protein which requires light for its high level expression.
Bnascaffold0027G0028200ZS	N_WCS417_30m	N_Control	3359.01	6332.4	4845.7	-0.914562	0.0679761	-13.4542	2.90977e-41	3.20526e-39	Normal	N_WCS417_30m-N_Control	RNC	--	--	--
BnaC03G0171900ZS	N_WCS417_30m	N_Control	4077.76	2043.35	3060.56	0.996704	0.0741183	13.4475	3.18545e-41	3.5007e-39	Normal	N_WCS417_30m-N_Control	RNC	AT2G30490	REF3	Encodes a cinnamate-4-hydroxylase. Mutations in this gene impact phenylpropanoid metabolism, growth and development.
BnaA09G0371400ZS	N_WCS417_30m	N_Control	2018.31	3960.47	2989.39	-0.9725	0.07232	-13.4472	3.19816e-41	3.50644e-39	Normal	N_WCS417_30m-N_Control	RNC	--	--	--
BnaA05G0238900ZS	N_WCS417_30m	N_Control	2523.84	5097.46	3810.65	-1.0142	0.0754661	-13.4392	3.56367e-41	3.89805e-39	Down	N_WCS417_30m-N_Control	RNC	--	--	--
Bnascaffold2048G0000100ZS	N_WCS417_30m	N_Control	3823.1	6791.47	5307.29	-0.828927	0.0617319	-13.4279	4.15243e-41	4.53147e-39	Normal	N_WCS417_30m-N_Control	RNC	--	--	--
BnaC02G0106000ZS	N_WCS417_30m	N_Control	3951.12	1987.74	2969.43	0.990952	0.0738856	13.412	5.1448e-41	5.60137e-39	Normal	N_WCS417_30m-N_Control	RNC	AT5G21090	--	Leucine-rich repeat (LRR) family protein
BnaA01G0154100ZS	N_WCS417_30m	N_Control	4574.41	2407.34	3490.87	0.926083	0.0691742	13.3877	7.13637e-41	7.75166e-39	Normal	N_WCS417_30m-N_Control	RNC	AT4G25900	--	Galactose mutarotase-like superfamily protein
Bnascaffold0027G0066000ZS	N_WCS417_30m	N_Control	3436.74	6407.39	4922.07	-0.898552	0.0671242	-13.3864	7.26137e-41	7.86918e-39	Normal	N_WCS417_30m-N_Control	RNC	--	--	--
BnaA03G0023700ZS	N_WCS417_30m	N_Control	2508.05	4806.07	3657.06	-0.938075	0.0700824	-13.3853	7.36853e-41	7.96687e-39	Normal	N_WCS417_30m-N_Control	RNC	AT5G06320	NHL3	encodes a protein whose sequence is similar to tobacco hairpin-induced gene (HIN1) and Arabidopsis non-race specific disease resistance gene (NDR1). Expression of this gene is induced by cucumber mosaic virus, spermine and Pseudomonas syringae pv. tomato DC3000. The gene product is localized to the plasma membrane.
BnaA07G0385400ZS	N_WCS417_30m	N_Control	835.248	2053.84	1444.54	-1.29798	0.0970528	-13.374	8.58125e-41	9.25667e-39	Down	N_WCS417_30m-N_Control	RNC	AT1G80840	WRKY40	Pathogen-induced transcription factor. Binds W-box sequences in vitro. Forms protein complexes with itself and with WRKY40 and WRKY60. Coexpression with WRKY18 or WRKY60 made plants more susceptible to both P. syringae and B. cinerea. WRKY18, WRKY40, and WRKY60 have partially redundant roles in response to the hemibiotrophic bacterial pathogen Pseudomonas syringae and the necrotrophic fungal path…
BnaA06G0218500ZS	N_WCS417_30m	N_Control	2829.42	5414.44	4121.93	-0.936022	0.0700111	-13.3696	9.10013e-41	9.79384e-39	Normal	N_WCS417_30m-N_Control	RNC	--	--	--
BnaA09G0356000ZS	N_WCS417_30m	N_Control	2486.23	4741.41	3613.82	-0.931432	0.0697091	-13.3617	1.01231e-40	1.08698e-38	Normal	N_WCS417_30m-N_Control	RNC	--	--	--
BnaC05G0252300ZS	N_WCS417_30m	N_Control	194.024	830.88	512.452	-2.09864	0.15715	-13.3544	1.11632e-40	1.19592e-38	Down	N_WCS417_30m-N_Control	RNC	AT1G29340	PUB17	Encodes a protein containing a UND, a U-box, and an ARM domain. This protein has E3 ubiquitin ligase activity. It is required for cell death and full resistance specified by Arabidopsis RPM1 and RPS4 resistance proteins against Pseudomonas syringae pv tomato.
BnaC03G0611600ZS	N_WCS417_30m	N_Control	181.177	839.71	510.444	-2.21212	0.165739	-13.347	1.23382e-40	1.31878e-38	Down	N_WCS417_30m-N_Control	RNC	AT3G46620	RDUF1	Encodes an ABA- and drought-induced RING-DUF1117 gene whose mutation results in hyposensitive phenotypes toward ABA in terms of germination rate and stomatal closure and markedly reduced tolerance to drought stress relative to wild-type plants.
BnaC02G0526800ZS	N_WCS417_30m	N_Control	367.59	1219.46	793.524	-1.72961	0.129644	-13.3412	1.33358e-40	1.42216e-38	Down	N_WCS417_30m-N_Control	RNC	AT5G61600	ERF104	encodes a member of the ERF (ethylene response factor) subfamily B-3 of ERF/AP2 transcription factor family. The protein contains one AP2 domain. There are 18 members in this subfamily including ATERF-1, ATERF-2, AND ATERF-5.
BnaA09G0297500ZS	N_WCS417_30m	N_Control	1912.65	3795.69	2854.17	-0.988872	0.0741413	-13.3377	1.39779e-40	1.48725e-38	Normal	N_WCS417_30m-N_Control	RNC	--	--	--
BnaC06G0411400ZS	N_WCS417_30m	N_Control	11.2806	349.182	180.231	-4.95929	0.37203	-13.3303	1.54188e-40	1.63683e-38	Down	N_WCS417_30m-N_Control	RNC	AT1G74930	ORA47	encodes a member of the DREB subfamily A-5 of ERF/AP2 transcription factor family. The protein contains one AP2 domain. There are 15 members in this subfamily including RAP2.1, RAP2.9 and RAP2.10.
BnaA05G0223100ZS	N_WCS417_30m	N_Control	2048.73	4042.03	3045.38	-0.980525	0.073569	-13.328	1.59177e-40	1.68598e-38	Normal	N_WCS417_30m-N_Control	RNC	--	--	--
Bnascaffold2206G0000400ZS	N_WCS417_30m	N_Control	4003.69	6979.64	5491.66	-0.801796	0.0602001	-13.3189	1.79848e-40	1.90063e-38	Normal	N_WCS417_30m-N_Control	RNC	--	--	--
Bnascaffold0211G0000400ZS	N_WCS417_30m	N_Control	2608.56	4887.17	3747.87	-0.905764	0.0680313	-13.3139	1.92105e-40	2.02558e-38	Normal	N_WCS417_30m-N_Control	RNC	--	--	--
BnaC08G0090100ZS	N_WCS417_30m	N_Control	3782.74	6846.82	5314.78	-0.855997	0.0643276	-13.3068	2.11235e-40	2.22229e-38	Normal	N_WCS417_30m-N_Control	RNC	--	--	--
BnaA05G0267200ZS	N_WCS417_30m	N_Control	1519.36	3188.02	2353.69	-1.06922	0.0804212	-13.2953	2.46615e-40	2.58289e-38	Down	N_WCS417_30m-N_Control	RNC	--	--	--
BnaA05G0314300ZS	N_WCS417_30m	N_Control	2664.94	1183.3	1924.12	1.17084	0.088103	13.2894	2.66534e-40	2.78528e-38	Up	N_WCS417_30m-N_Control	RNC	AT1G35580	NIN2	CINV1 / A/N-InvG is an alkaline/neutral invertase that breaks sucrose down into fructose and glucose (GH100). The exact localization of CINV1 remains under investigation but there is evidence that fluorescently-tagged CINV1 localizes to the cytoplasm. atinvg mutants have reduced root growth, reduced invertase activity, and increased expression of antioxidant genes under basal conditions. The leve…
Bnascaffold0027G0009800ZS	N_WCS417_30m	N_Control	3634.53	6773.33	5203.93	-0.897823	0.0677327	-13.2554	4.19905e-40	4.37823e-38	Normal	N_WCS417_30m-N_Control	RNC	--	--	--
Bnascaffold0553G0000100ZS	N_WCS417_30m	N_Control	3022.88	5716.93	4369.91	-0.91926	0.0693696	-13.2516	4.41543e-40	4.59362e-38	Normal	N_WCS417_30m-N_Control	RNC	--	--	--
Bnascaffold0027G0032900ZS	N_WCS417_30m	N_Control	3999.58	7377.58	5688.58	-0.883251	0.0667784	-13.2266	6.16049e-40	6.39489e-38	Normal	N_WCS417_30m-N_Control	RNC	--	--	--
BnaC03G0507900ZS	N_WCS417_30m	N_Control	1958.69	765.682	1362.19	1.35573	0.102633	13.2094	7.74192e-40	8.01871e-38	Up	N_WCS417_30m-N_Control	RNC	AT2G17840	ERD7	Identified as drought-inducible gene by differential hybridization. Upregulated by high light, drought, cold and salt stress determined by microarray analysis.
Bnascaffold0230G0000100ZS	N_WCS417_30m	N_Control	4737.94	8517.36	6627.65	-0.846018	0.064121	-13.1941	9.48983e-40	9.80741e-38	Normal	N_WCS417_30m-N_Control	RNC	--	--	--
BnaC08G0088200ZS	N_WCS417_30m	N_Control	3226.53	5956	4591.27	-0.884444	0.0670814	-13.1846	1.07567e-39	1.10921e-37	Normal	N_WCS417_30m-N_Control	RNC	--	--	--
BnaA02G0013400ZS	N_WCS417_30m	N_Control	2347.38	998.261	1672.82	1.23302	0.0935513	13.1802	1.14106e-39	1.17407e-37	Up	N_WCS417_30m-N_Control	RNC	AT5G03620	--	Subtilisin-like serine endopeptidase family protein
BnaA01G0240400ZS	N_WCS417_30m	N_Control	7103.5	12743.4	9923.48	-0.843248	0.0640055	-13.1746	1.22849e-39	1.26125e-37	Normal	N_WCS417_30m-N_Control	RNC	--	--	--
Bnascaffold0090G0000400ZS	N_WCS417_30m	N_Control	4410.3	7891.42	6150.86	-0.839329	0.0637346	-13.1691	1.32109e-39	1.35335e-37	Normal	N_WCS417_30m-N_Control	RNC	--	--	--
Bnascaffold0343G0000400ZS	N_WCS417_30m	N_Control	3301.18	6037.81	4669.49	-0.871036	0.0661848	-13.1607	1.47778e-39	1.51056e-37	Normal	N_WCS417_30m-N_Control	RNC	--	--	--
BnaC09G0251000ZS	N_WCS417_30m	N_Control	546.591	64.5438	305.568	3.08004	0.234072	13.1585	1.52052e-39	1.54962e-37	Up	N_WCS417_30m-N_Control	RNC	AT2G01150	RHA2B	Encodes a RING-H2 finger protein that is expressed in vascular tissue, root tips, embryos and pistils.
BnaA03G0147400ZS	N_WCS417_30m	N_Control	5166.72	2792.89	3979.8	0.887692	0.067462	13.1584	1.52261e-39	1.54962e-37	Normal	N_WCS417_30m-N_Control	RNC	AT2G30490	REF3	Encodes a cinnamate-4-hydroxylase. Mutations in this gene impact phenylpropanoid metabolism, growth and development.
BnaC08G0450900ZS	N_WCS417_30m	N_Control	3217.95	1565.25	2391.6	1.03972	0.0790398	13.1544	1.60496e-39	1.62989e-37	Up	N_WCS417_30m-N_Control	RNC	AT2G21630	AtSEC23C	Sec23/Sec24 protein transport family protein
BnaA01G0254000ZS	N_WCS417_30m	N_Control	2669.07	5150.58	3909.82	-0.948393	0.072143	-13.146	1.79378e-39	1.8177e-37	Normal	N_WCS417_30m-N_Control	RNC	--	--	--
Bnascaffold2951G0000100ZS	N_WCS417_30m	N_Control	3145.46	5706.63	4426.04	-0.859367	0.0653723	-13.1457	1.80042e-39	1.82049e-37	Normal	N_WCS417_30m-N_Control	RNC	--	--	--
BnaC05G0181000ZS	N_WCS417_30m	N_Control	2132.16	896.192	1514.18	1.25036	0.0952285	13.1302	2.21217e-39	2.23201e-37	Up	N_WCS417_30m-N_Control	RNC	AT1G21120	IGMT2	O-methyltransferase family protein
Bnascaffold0026G0014500ZS	N_WCS417_30m	N_Control	3090.59	5842.64	4466.62	-0.91859	0.069995	-13.1236	2.41044e-39	2.42683e-37	Normal	N_WCS417_30m-N_Control	RNC	--	--	--
BnaA05G0265600ZS	N_WCS417_30m	N_Control	1682.25	3422.94	2552.6	-1.02467	0.0780907	-13.1216	2.47735e-39	2.48884e-37	Down	N_WCS417_30m-N_Control	RNC	--	--	--
BnaC08G0088000ZS	N_WCS417_30m	N_Control	4040.21	7539.56	5789.88	-0.900086	0.0686079	-13.1193	2.55336e-39	2.5597e-37	Normal	N_WCS417_30m-N_Control	RNC	--	--	--
Bnascaffold0047G0000400ZS	N_WCS417_30m	N_Control	6105.54	11274.5	8690.02	-0.884765	0.0674967	-13.1083	2.95204e-39	2.94766e-37	Normal	N_WCS417_30m-N_Control	RNC	--	--	--
BnaA09G0371000ZS	N_WCS417_30m	N_Control	2026.04	3928.97	2977.51	-0.955498	0.0728928	-13.1083	2.95295e-39	2.94766e-37	Normal	N_WCS417_30m-N_Control	RNC	--	--	--
BnaC07G0495800ZS	N_WCS417_30m	N_Control	819.871	187.446	503.659	2.12888	0.162441	13.1055	3.06156e-39	3.04957e-37	Up	N_WCS417_30m-N_Control	RNC	AT5G48070	XTH20	putative xyloglucan endotransglycosylase/hydrolase, expressed primarily in the stele of mature non-elongating regions of both the main and the lateral root. Is expressed in lateral root primordia but expression ceases after lateral root begins to grow.
BnaA01G0241400ZS	N_WCS417_30m	N_Control	2247.69	4346.21	3296.95	-0.951074	0.0726282	-13.0951	3.51191e-39	3.49073e-37	Normal	N_WCS417_30m-N_Control	RNC	--	--	--
BnaA02G0057600ZS	N_WCS417_30m	N_Control	927.55	218.993	573.271	2.08066	0.15891	13.0934	3.59311e-39	3.56388e-37	Up	N_WCS417_30m-N_Control	RNC	AT5G15130	WRKY72	member of WRKY Transcription Factor; Group II-b; contribute to basal immunity.
BnaA04G0207600ZS	N_WCS417_30m	N_Control	718.302	1908.95	1313.63	-1.41038	0.10778	-13.0857	3.97405e-39	3.93338e-37	Down	N_WCS417_30m-N_Control	RNC	AT2G31880	SOBIR1	Encodes a putative leucine rich repeat transmembrane protein that is expressed in response to Pseudomonas syringae. Expression of SRRLK may be required for silencing via lsiRNAs. Regulates cell death and innate immunity.
BnaA05G0262900ZS	N_WCS417_30m	N_Control	2085.68	4076.29	3080.98	-0.966553	0.0738662	-13.0852	4.00148e-39	3.95218e-37	Normal	N_WCS417_30m-N_Control	RNC	--	--	--
BnaC06G0247100ZS	N_WCS417_30m	N_Control	1067.76	298.375	683.067	1.83886	0.140611	13.0776	4.42199e-39	4.35831e-37	Up	N_WCS417_30m-N_Control	RNC	AT1G80920	Toc12	A nuclear encoded soluble protein found in the chloroplast stroma. Negatively regulated by light and has rapid turnover in darkness.
BnaA05G0275800ZS	N_WCS417_30m	N_Control	1746.22	3833.67	2789.94	-1.13398	0.0867652	-13.0696	4.9152e-39	4.83424e-37	Down	N_WCS417_30m-N_Control	RNC	--	--	--
BnaA07G0147500ZS	N_WCS417_30m	N_Control	482.224	1507.47	994.849	-1.64487	0.125858	-13.0693	4.93013e-39	4.83876e-37	Down	N_WCS417_30m-N_Control	RNC	AT5G66650	MCU6	Protein of unknown function (DUF607)
BnaA09G0369900ZS	N_WCS417_30m	N_Control	2125.6	4409.3	3267.45	-1.0525	0.0805651	-13.064	5.28985e-39	5.18096e-37	Down	N_WCS417_30m-N_Control	RNC	--	--	--
BnaA05G0225500ZS	N_WCS417_30m	N_Control	4365.48	7750.02	6057.75	-0.828221	0.0634365	-13.0559	5.88076e-39	5.74768e-37	Normal	N_WCS417_30m-N_Control	RNC	--	--	--
BnaA09G0630000ZS	N_WCS417_30m	N_Control	2266.54	983.487	1625.01	1.20441	0.0923204	13.046	6.69556e-39	6.5304e-37	Up	N_WCS417_30m-N_Control	RNC	AT1G14870	PCR2	PCR2 encodes a membrane protein involved in zinc transport and detoxification.
BnaA01G0241200ZS	N_WCS417_30m	N_Control	2349.57	4546.14	3447.86	-0.952038	0.0730044	-13.0408	7.16747e-39	6.97614e-37	Normal	N_WCS417_30m-N_Control	RNC	--	--	--
BnaA08G0239500ZS	N_WCS417_30m	N_Control	875.861	200.137	537.999	2.13174	0.163566	13.0329	7.94894e-39	7.7207e-37	Up	N_WCS417_30m-N_Control	RNC	AT1G22410	--	Class-II DAHP synthetase family protein
BnaC08G0085600ZS	N_WCS417_30m	N_Control	3033.29	5548.26	4290.77	-0.871114	0.0668487	-13.0311	8.14032e-39	7.89021e-37	Normal	N_WCS417_30m-N_Control	RNC	--	--	--
Bnascaffold0027G0066700ZS	N_WCS417_30m	N_Control	3439.81	6318.93	4879.37	-0.87712	0.0673394	-13.0254	8.77864e-39	8.49134e-37	Normal	N_WCS417_30m-N_Control	RNC	--	--	--
BnaA05G0287500ZS	N_WCS417_30m	N_Control	1247.53	2742.28	1994.9	-1.13664	0.0873303	-13.0154	9.99627e-39	9.64918e-37	Down	N_WCS417_30m-N_Control	RNC	--	--	--
BnaC02G0379200ZS	N_WCS417_30m	N_Control	1083.6	314.301	698.951	1.78499	0.137181	13.0119	1.04682e-38	1.0084e-36	Up	N_WCS417_30m-N_Control	RNC	AT5G42650	DDE2	Encodes a member of the cytochrome p450 CYP74 gene family that functions as an allene oxide synthase. This enzyme catalyzes dehydration of the hydroperoxide to an unstable allene oxide in the JA biosynthetic pathway. It shows a dual catalytic activity, the major one being a 13-AOS but also expressing a 9-AOS activity.
BnaA09G0306000ZS	N_WCS417_30m	N_Control	2909.36	5290.22	4099.79	-0.862652	0.0663288	-13.0057	1.13547e-38	1.09154e-36	Normal	N_WCS417_30m-N_Control	RNC	--	--	--
BnaA07G0377700ZS	N_WCS417_30m	N_Control	2967.07	1383.34	2175.21	1.10042	0.0846321	13.0025	1.18484e-38	1.13667e-36	Up	N_WCS417_30m-N_Control	RNC	AT1G78830	MNB1	Curculin-like (mannose-binding) lectin family protein
Bnascaffold0027G0036500ZS	N_WCS417_30m	N_Control	2475.03	4606.39	3540.71	-0.896281	0.0689796	-12.9934	1.33351e-38	1.27668e-36	Normal	N_WCS417_30m-N_Control	RNC	--	--	--
BnaA02G0004000ZS	N_WCS417_30m	N_Control	3260.6	1487.86	2374.23	1.13262	0.087246	12.9819	1.54932e-38	1.48026e-36	Up	N_WCS417_30m-N_Control	RNC	AT5G01750	--	Protein of unknown function (DUF567)
Bnascaffold0025G0032000ZS	N_WCS417_30m	N_Control	2551.11	5262.41	3906.76	-1.04449	0.080512	-12.9732	1.73732e-38	1.65651e-36	Down	N_WCS417_30m-N_Control	RNC	--	--	--
BnaA09G0331300ZS	N_WCS417_30m	N_Control	1592.86	3313.96	2453.41	-1.05664	0.0814694	-12.9698	1.81605e-38	1.72805e-36	Down	N_WCS417_30m-N_Control	RNC	--	--	--
Bnascaffold0026G0040800ZS	N_WCS417_30m	N_Control	3129.43	5690.78	4410.11	-0.862536	0.0665377	-12.9631	1.9802e-38	1.88043e-36	Normal	N_WCS417_30m-N_Control	RNC	--	--	--
Bnascaffold1478G0000100ZS	N_WCS417_30m	N_Control	8357.89	14560.1	11459	-0.800718	0.0617957	-12.9575	2.13085e-38	2.01939e-36	Normal	N_WCS417_30m-N_Control	RNC	--	--	--
BnaA05G0286400ZS	N_WCS417_30m	N_Control	2419.76	4554.86	3487.31	-0.912605	0.0704472	-12.9545	2.21692e-38	2.09671e-36	Normal	N_WCS417_30m-N_Control	RNC	--	--	--
BnaC07G0259200ZS	N_WCS417_30m	N_Control	2418.9	975.987	1697.45	1.31045	0.101292	12.9373	2.77148e-38	2.61592e-36	Up	N_WCS417_30m-N_Control	RNC	AT5G47450	TIP2;3	Tonoplast intrinsic protein, transports ammonium (NH3) and methylammonium across the tonoplast membrane, gene expression shows diurnal regulation and is upregulated by ammonium (NH3).
BnaA04G0283700ZS	N_WCS417_30m	N_Control	168.36	802.454	485.407	-2.25409	0.174411	-12.924	3.2965e-38	3.10521e-36	Down	N_WCS417_30m-N_Control	RNC	AT2G44840	ERF13	encodes a member of the ERF (ethylene response factor) subfamily B-3 of ERF/AP2 transcription factor family. The protein contains one AP2 domain. There are 18 members in this subfamily including ATERF-1, ATERF-2, AND ATERF-5.
BnaA04G0299000ZS	N_WCS417_30m	N_Control	1479.66	523.333	1001.5	1.50009	0.116093	12.9215	3.40533e-38	3.20128e-36	Up	N_WCS417_30m-N_Control	RNC	AT2G47550	PMEI-PME20	Plant invertase/pectin methylesterase inhibitor superfamily
BnaC02G0542300ZS	N_WCS417_30m	N_Control	539.909	1477.15	1008.53	-1.45218	0.112457	-12.9133	3.78881e-38	3.55465e-36	Down	N_WCS417_30m-N_Control	RNC	AT5G64310	ATAGP1	Encodes arabinogalactan-protein (AGP1).
BnaA09G0348700ZS	N_WCS417_30m	N_Control	2207.75	4308.47	3258.11	-0.964383	0.0747072	-12.9088	4.01346e-38	3.75788e-36	Normal	N_WCS417_30m-N_Control	RNC	--	--	--
BnaA05G0289800ZS	N_WCS417_30m	N_Control	2420.72	4637.71	3529.21	-0.937851	0.0726713	-12.9054	4.19793e-38	3.92276e-36	Normal	N_WCS417_30m-N_Control	RNC	--	--	--
BnaA05G0212300ZS	N_WCS417_30m	N_Control	1887.49	3768.17	2827.83	-0.997711	0.0773431	-12.8998	4.51162e-38	4.20749e-36	Normal	N_WCS417_30m-N_Control	RNC	--	--	--
Bnascaffold0027G0051600ZS	N_WCS417_30m	N_Control	2952.06	5728.32	4340.19	-0.956148	0.0741893	-12.888	5.26208e-38	4.8976e-36	Normal	N_WCS417_30m-N_Control	RNC	--	--	--
BnaA01G0247300ZS	N_WCS417_30m	N_Control	1790.26	3536.28	2663.27	-0.981919	0.0762287	-12.8812	5.74128e-38	5.33301e-36	Normal	N_WCS417_30m-N_Control	RNC	--	--	--
BnaA09G0368100ZS	N_WCS417_30m	N_Control	2184.51	4205.33	3194.92	-0.944953	0.0733891	-12.8759	6.14871e-38	5.70016e-36	Normal	N_WCS417_30m-N_Control	RNC	--	--	--
BnaA05G0369100ZS	N_WCS417_30m	N_Control	1420.81	499.06	959.933	1.5098	0.117275	12.874	6.30434e-38	5.83288e-36	Up	N_WCS417_30m-N_Control	RNC	AT3G19010	--	2-oxoglutarate (2OG) and Fe(II)-dependent oxygenase superfamily protein
BnaC09G0160800ZS	N_WCS417_30m	N_Control	667.532	1708.18	1187.86	-1.35529	0.105301	-12.8706	6.58899e-38	6.08423e-36	Down	N_WCS417_30m-N_Control	RNC	AT1G63840	--	RING/U-box superfamily protein
BnaA03G0129800ZS	N_WCS417_30m	N_Control	2537.67	4683.98	3610.83	-0.884082	0.0688073	-12.8487	8.75083e-38	8.06381e-36	Normal	N_WCS417_30m-N_Control	RNC	AT5G53460	GLT1	NADH-dependent glutamate synthase
Bnascaffold0027G0039800ZS	N_WCS417_30m	N_Control	1922.33	3770.16	2846.25	-0.9719	0.0756429	-12.8485	8.76725e-38	8.06381e-36	Normal	N_WCS417_30m-N_Control	RNC	--	--	--
BnaC01G0394800ZS	N_WCS417_30m	N_Control	191.523	794.648	493.085	-2.05323	0.159865	-12.8435	9.35384e-38	8.58646e-36	Down	N_WCS417_30m-N_Control	RNC	AT3G19580	ZF2	Encodes zinc finger protein. mRNA levels are upregulated in response to ABA, high salt, and mild dessication. The protein is localized to the nucleus and acts as a transcriptional repressor.
BnaC03G0482200ZS	N_WCS417_30m	N_Control	942.24	250.433	596.336	1.91144	0.149018	12.827	1.15824e-37	1.06114e-35	Up	N_WCS417_30m-N_Control	RNC	AT2G06050	OPR3	Encodes a 12-oxophytodienoate reductase that is required for jasmonate biosynthesis. Mutants are male sterile and defective in pollen dehiscence. Shows activity towards 2,4,6-trinitrotoluene.
BnaC08G0089700ZS	N_WCS417_30m	N_Control	2762.35	5196.35	3979.35	-0.91175	0.0711184	-12.8202	1.264e-37	1.15577e-35	Normal	N_WCS417_30m-N_Control	RNC	--	--	--
BnaA09G0357800ZS	N_WCS417_30m	N_Control	3906.29	6783.54	5344.91	-0.796306	0.0622286	-12.7965	1.7161e-37	1.5661e-35	Normal	N_WCS417_30m-N_Control	RNC	--	--	--
BnaA05G0274500ZS	N_WCS417_30m	N_Control	2068	4349.9	3208.95	-1.07304	0.0838661	-12.7947	1.75596e-37	1.59936e-35	Down	N_WCS417_30m-N_Control	RNC	--	--	--
BnaA05G0267600ZS	N_WCS417_30m	N_Control	2286.12	4277.42	3281.77	-0.903937	0.0706655	-12.7918	1.82245e-37	1.6567e-35	Normal	N_WCS417_30m-N_Control	RNC	--	--	--
BnaA09G0021100ZS	N_WCS417_30m	N_Control	1585.74	600.717	1093.23	1.40026	0.109817	12.7508	3.08449e-37	2.79851e-35	Up	N_WCS417_30m-N_Control	RNC	AT4G01700	--	Chitinase family protein
BnaA09G0346800ZS	N_WCS417_30m	N_Control	1956.66	3817.73	2887.2	-0.964277	0.0756771	-12.742	3.4541e-37	3.12779e-35	Normal	N_WCS417_30m-N_Control	RNC	--	--	--
Bnascaffold0025G0012400ZS	N_WCS417_30m	N_Control	2184.53	4200.05	3192.29	-0.943156	0.0740433	-12.7379	3.64071e-37	3.29041e-35	Normal	N_WCS417_30m-N_Control	RNC	--	--	--
BnaA05G0204000ZS	N_WCS417_30m	N_Control	1429.54	2935.95	2182.75	-1.03814	0.0815195	-12.7348	3.7862e-37	3.41531e-35	Down	N_WCS417_30m-N_Control	RNC	--	--	--
BnaC02G0151900ZS	N_WCS417_30m	N_Control	384.438	25.5744	205.006	3.91042	0.307127	12.7322	3.91431e-37	3.52409e-35	Up	N_WCS417_30m-N_Control	RNC	AT5G56550	OXS3	Encodes OXIDATIVE STRESS 3 (OXS3)&#65292; involved in tolerance to heavy metals and oxidative stress.
BnaA09G0302200ZS	N_WCS417_30m	N_Control	2161.62	4583.88	3372.75	-1.08451	0.0852339	-12.724	4.35161e-37	3.91027e-35	Down	N_WCS417_30m-N_Control	RNC	--	--	--
Bnascaffold0060G0000400ZS	N_WCS417_30m	N_Control	4713.3	8481.78	6597.54	-0.847548	0.066646	-12.7172	4.74781e-37	4.25811e-35	Normal	N_WCS417_30m-N_Control	RNC	--	--	--
Bnascaffold1944G0000200ZS	N_WCS417_30m	N_Control	3616.13	6924.42	5270.27	-0.936918	0.0736964	-12.7132	4.99438e-37	4.47069e-35	Normal	N_WCS417_30m-N_Control	RNC	--	--	--
Bnascaffold0034G0001100ZS	N_WCS417_30m	N_Control	7530.29	13845.3	10687.8	-0.878468	0.0691154	-12.7102	5.19209e-37	4.6388e-35	Normal	N_WCS417_30m-N_Control	RNC	--	--	--
BnaA09G0329200ZS	N_WCS417_30m	N_Control	1906.73	3764.2	2835.46	-0.98135	0.0774232	-12.6752	8.1202e-37	7.24106e-35	Normal	N_WCS417_30m-N_Control	RNC	--	--	--
BnaC05G0444500ZS	N_WCS417_30m	N_Control	149.692	703.627	426.66	-2.23275	0.176267	-12.6669	9.02548e-37	8.03302e-35	Down	N_WCS417_30m-N_Control	RNC	AT3G15670	LEA76	Late embryogenesis abundant protein (LEA) family protein
BnaA07G0067900ZS	N_WCS417_30m	N_Control	1121.94	343.715	732.826	1.70695	0.13482	12.661	9.72597e-37	8.64006e-35	Up	N_WCS417_30m-N_Control	RNC	AT3G24500	MBF1C	One of three genes in A. thaliana encoding multiprotein bridging factor 1, a highly conserved transcriptional coactivator. May serve as a bridging factor between a bZIP factor and TBP. Its expression is specifically elevated in response to pathogen infection, salinity, drought, heat, hydrogen peroxide, and application of abscisic acid or salicylic acid. Constitutive expression enhances the tolera…
BnaA05G0280100ZS	N_WCS417_30m	N_Control	2679.72	5125.82	3902.77	-0.936045	0.0739353	-12.6603	9.8091e-37	8.6974e-35	Normal	N_WCS417_30m-N_Control	RNC	--	--	--
BnaC05G0542600ZS	N_WCS417_30m	N_Control	1256.4	420.396	838.4	1.57965	0.124868	12.6506	1.11089e-36	9.83124e-35	Up	N_WCS417_30m-N_Control	RNC	AT3G04870	ZDS	Involved in the biosynthesis of carotenes and xanthophylls, reduces zeta-carotene to lycopene.
BnaC05G0570800ZS	N_WCS417_30m	N_Control	2725.52	1288.6	2007.06	1.08059	0.0855255	12.6347	1.3591e-36	1.20052e-34	Up	N_WCS417_30m-N_Control	RNC	AT3G02360	PGD2	6-phosphogluconate dehydrogenase family protein
BnaC02G0047800ZS	N_WCS417_30m	N_Control	1573.81	581.428	1077.62	1.4367	0.113809	12.6237	1.56304e-36	1.37807e-34	Up	N_WCS417_30m-N_Control	RNC	AT5G11670	NADP-ME2	The malic enzyme (EC 1.1.1.40) encoded by AtNADP-ME2 is presumably a cytosolic enzyme involved in malate metabolism and possibly assisting the oxidative pentose phosphate pathway. AtNADP-ME2 counts for the major part of NADP-ME activity in mature tissues of Arabidopsis.
BnaA02G0125000ZS	N_WCS417_30m	N_Control	3000.93	1413.21	2207.07	1.08587	0.0860885	12.6135	1.77968e-36	1.56612e-34	Up	N_WCS417_30m-N_Control	RNC	AT5G56030	HSP90.2	A member of heat shock protein 90 (HSP90) gene family. Expressed in all tissues and abundant in root apical meristem, pollen and tapetum. Expression is NOT heat-induced but induced by IAA and NaCl. Interacts with HsfA1d in the cytosol and the nucleus and negatively regulates HsfA1d. Did not bind to AtHsfA4c.
BnaC07G0513600ZS	N_WCS417_30m	N_Control	899.184	227.056	563.12	1.98635	0.157681	12.5973	2.18512e-36	1.9193e-34	Up	N_WCS417_30m-N_Control	RNC	AT4G33420	Prx47	Peroxidase superfamily protein
BnaA04G0059000ZS	N_WCS417_30m	N_Control	295.868	997.174	646.521	-1.75325	0.139277	-12.5882	2.45276e-36	2.15034e-34	Down	N_WCS417_30m-N_Control	RNC	AT4G14450	PH1	--
Bnascaffold0027G0035800ZS	N_WCS417_30m	N_Control	2969.09	5345.15	4157.12	-0.848355	0.067449	-12.5777	2.80005e-36	2.45022e-34	Normal	N_WCS417_30m-N_Control	RNC	--	--	--
BnaA09G0356800ZS	N_WCS417_30m	N_Control	1516.84	3096.67	2306.75	-1.02975	0.0819288	-12.5688	3.13493e-36	2.73815e-34	Down	N_WCS417_30m-N_Control	RNC	--	--	--
BnaC05G0174300ZS	N_WCS417_30m	N_Control	2228.91	4432.6	3330.76	-0.991764	0.0789079	-12.5686	3.14078e-36	2.73815e-34	Normal	N_WCS417_30m-N_Control	RNC	AT1G20450	LTI45	Encodes a gene induced by low temperature and dehydration. Inhibits e.coli growth while overexpressed. Belongs to the dehydrin protein family, which contains highly conserved stretches of 7-17 residues that are repetitively scattered in their sequences, the K-, S-, Y- and lysine rich segments. LTI29 and LTI30 double overexpressors confer cold tolerance. Localized to membranes and cytoplasm.
Bnascaffold0027G0034500ZS	N_WCS417_30m	N_Control	3374.45	5969.65	4672.05	-0.822879	0.0654898	-12.565	3.28898e-36	2.86202e-34	Normal	N_WCS417_30m-N_Control	RNC	--	--	--
BnaA09G0340100ZS	N_WCS417_30m	N_Control	1130.22	2432.22	1781.22	-1.10556	0.0881723	-12.5386	4.58931e-36	3.98615e-34	Down	N_WCS417_30m-N_Control	RNC	--	--	--
Bnascaffold0214G0000100ZS	N_WCS417_30m	N_Control	3232.55	6083.29	4657.92	-0.912093	0.0727635	-12.535	4.80236e-36	4.16346e-34	Normal	N_WCS417_30m-N_Control	RNC	--	--	--
BnaC03G0077100ZS	N_WCS417_30m	N_Control	1191.19	391.871	791.533	1.60384	0.128106	12.5197	5.82912e-36	5.03498e-34	Up	N_WCS417_30m-N_Control	RNC	AT5G16010	--	3-oxo-5-alpha-steroid 4-dehydrogenase family protein
Bnascaffold0027G0036200ZS	N_WCS417_30m	N_Control	2306.95	4735.53	3521.24	-1.03734	0.0829223	-12.5098	6.5962e-36	5.68707e-34	Down	N_WCS417_30m-N_Control	RNC	--	--	--
BnaA05G0400500ZS	N_WCS417_30m	N_Control	4443.09	2388.37	3415.73	0.89583	0.071694	12.4952	7.93053e-36	6.82037e-34	Normal	N_WCS417_30m-N_Control	RNC	AT3G16530	--	Lectin like protein whose expression is induced upon treatment with chitin oligomers.
Bnascaffold0919G0000300ZS	N_WCS417_30m	N_Control	1886.53	3613.08	2749.8	-0.937423	0.0750232	-12.4951	7.93981e-36	6.82037e-34	Normal	N_WCS417_30m-N_Control	RNC	--	--	--
BnaC02G0034000ZS	N_WCS417_30m	N_Control	2740.81	4901.08	3820.94	-0.838605	0.0671586	-12.4869	8.7975e-36	7.54329e-34	Normal	N_WCS417_30m-N_Control	RNC	AT5G08790	ATAF2	induced by wounding, belongs to a large family of putative transcriptional activators with NAC domain.
BnaA01G0255200ZS	N_WCS417_30m	N_Control	4429.59	7806.16	6117.88	-0.817229	0.065529	-12.4713	1.07119e-35	9.16795e-34	Normal	N_WCS417_30m-N_Control	RNC	--	--	--
BnaA09G0303700ZS	N_WCS417_30m	N_Control	1609.82	3286.5	2448.16	-1.02984	0.0825913	-12.4691	1.10119e-35	9.4075e-34	Down	N_WCS417_30m-N_Control	RNC	--	--	--
BnaC08G0090400ZS	N_WCS417_30m	N_Control	1839.27	3559.68	2699.47	-0.9527	0.0764581	-12.4604	1.22725e-35	1.04654e-33	Normal	N_WCS417_30m-N_Control	RNC	--	--	--
BnaC03G0646100ZS	N_WCS417_30m	N_Control	991.842	2220.35	1606.1	-1.16251	0.0935084	-12.4322	1.74795e-35	1.48785e-33	Down	N_WCS417_30m-N_Control	RNC	AT1G27730	ZAT10	Related to Cys2/His2-type zinc-finger proteins found in higher plants. Compensated for a subset of calcineurin deficiency in yeast. Salt tolerance produced by ZAT10 appeared to be partially dependent on ENA1/PMR2, a P-type ATPase required for Li+ and Na+ efflux in yeast. The protein is localized to the nucleus, acts as a transcriptional repressor and is responsive to chitin oligomers. Also involv…
Bnascaffold0026G0038300ZS	N_WCS417_30m	N_Control	4720.52	8383.83	6552.18	-0.828574	0.0666668	-12.4286	1.82837e-35	1.55348e-33	Normal	N_WCS417_30m-N_Control	RNC	--	--	--
BnaA09G0369000ZS	N_WCS417_30m	N_Control	1874.65	3633.94	2754.3	-0.954946	0.0770313	-12.3969	2.71791e-35	2.3051e-33	Normal	N_WCS417_30m-N_Control	RNC	--	--	--
BnaC07G0492700ZS	N_WCS417_30m	N_Control	1033.64	296.768	665.206	1.79885	0.145157	12.3925	2.87043e-35	2.43006e-33	Up	N_WCS417_30m-N_Control	RNC	AT4G29900	CIF1	--
BnaA05G0285700ZS	N_WCS417_30m	N_Control	1556.03	3132.95	2344.49	-1.00942	0.0815066	-12.3845	3.1714e-35	2.68001e-33	Down	N_WCS417_30m-N_Control	RNC	--	--	--
BnaA06G0081600ZS	N_WCS417_30m	N_Control	1437.61	525.558	981.586	1.45176	0.117232	12.3836	3.20451e-35	2.7031e-33	Up	N_WCS417_30m-N_Control	RNC	AT1G63000	UER1	nucleotide-rhamnose synthase/epimerase-reductase
BnaA10G0004400ZS	N_WCS417_30m	N_Control	3085.18	1531.36	2308.27	1.01021	0.0815786	12.3833	3.21982e-35	2.71113e-33	Up	N_WCS417_30m-N_Control	RNC	AT1G01550	BPS1	Encodes a protein with no functionally characterized domains that to prevent the synthesis of a novel substance that moves from the root to the shoot, where it modifies shoot growth by interfering with auxin signaling. Synthesis and delivery of this substance requires neither phloem nor endodermis.
BnaC05G0167300ZS	N_WCS417_30m	N_Control	497.542	1368.75	933.143	-1.46034	0.118026	-12.373	3.65865e-35	3.0751e-33	Down	N_WCS417_30m-N_Control	RNC	AT1G19770	PUP14	Member of a family of proteins related to PUP1, a purine transporter. May be involved in the transport of purine and purine derivatives such as cytokinins, across the plasma membrane.
BnaA02G0408000ZS	N_WCS417_30m	N_Control	421.564	1242.74	832.153	-1.56002	0.126114	-12.3699	3.80103e-35	3.18905e-33	Down	N_WCS417_30m-N_Control	RNC	AT5G64310	ATAGP1	Encodes arabinogalactan-protein (AGP1).
BnaC09G0602900ZS	N_WCS417_30m	N_Control	649.531	1639.77	1144.65	-1.33589	0.108009	-12.3682	3.88248e-35	3.25156e-33	Down	N_WCS417_30m-N_Control	RNC	AT5G04340	ZAT6	putative c2h2 zinc finger transcription factor mRNA,
Bnascaffold0027G0013200ZS	N_WCS417_30m	N_Control	1313.45	324.276	818.864	2.01645	0.163192	12.3562	4.50704e-35	3.76789e-33	Up	N_WCS417_30m-N_Control	RNC	AT1G80920	Toc12	A nuclear encoded soluble protein found in the chloroplast stroma. Negatively regulated by light and has rapid turnover in darkness.
BnaA06G0218300ZS	N_WCS417_30m	N_Control	2914.27	5448.01	4181.14	-0.90239	0.0730375	-12.3552	4.56829e-35	3.81228e-33	Normal	N_WCS417_30m-N_Control	RNC	--	--	--
BnaA01G0253700ZS	N_WCS417_30m	N_Control	3141.54	5598.2	4369.87	-0.833374	0.0674733	-12.3512	4.8011e-35	3.99944e-33	Normal	N_WCS417_30m-N_Control	RNC	--	--	--
BnaA01G0241800ZS	N_WCS417_30m	N_Control	1691.89	3317.5	2504.7	-0.97142	0.0786651	-12.3488	4.94327e-35	4.11055e-33	Normal	N_WCS417_30m-N_Control	RNC	--	--	--
BnaC02G0301200ZS	N_WCS417_30m	N_Control	1647.43	3221.57	2434.5	-0.967687	0.0783856	-12.3452	5.16979e-35	4.2913e-33	Normal	N_WCS417_30m-N_Control	RNC	AT1G76810	eIF5B1	eukaryotic translation initiation factor 2 (eIF-2) family protein
BnaA07G0173300ZS	N_WCS417_30m	N_Control	2510.93	4666.57	3588.75	-0.894438	0.0724654	-12.343	5.31541e-35	4.40436e-33	Normal	N_WCS417_30m-N_Control	RNC	AT5G40450	RBB1	--
BnaA07G0369900ZS	N_WCS417_30m	N_Control	4835.37	8105.67	6470.52	-0.745251	0.0604867	-12.3209	6.99111e-35	5.78261e-33	Normal	N_WCS417_30m-N_Control	RNC	AT1G77760	NR1	Encodes the cytosolic minor isoform of nitrate reductase (NR). Involved in the first step of nitrate assimilation, it contributes about 15% of the nitrate reductase activity in shoots. Similar to molybdopterin oxidoreductases at the N-terminus, and to FAD/NAD-binding cytochrome reductases at the C-terminus. Cofactors: FAD, heme iron (cytochrome B-557), and molybdenum-pterin.
BnaC04G0487700ZS	N_WCS417_30m	N_Control	518.522	1385.23	951.874	-1.41753	0.115092	-12.3165	7.38641e-35	6.09881e-33	Down	N_WCS417_30m-N_Control	RNC	AT2G28780	--	--
BnaA05G0211000ZS	N_WCS417_30m	N_Control	2512.65	4579.1	3545.87	-0.86564	0.0702877	-12.3157	7.45884e-35	6.14776e-33	Normal	N_WCS417_30m-N_Control	RNC	--	--	--
BnaC07G0144600ZS	N_WCS417_30m	N_Control	397.081	1176.59	786.833	-1.5667	0.127244	-12.3126	7.753e-35	6.37899e-33	Down	N_WCS417_30m-N_Control	RNC	AT1G28370	ERF11	encodes a member of the ERF (ethylene response factor) subfamily B-1 of ERF/AP2 transcription factor family. The protein contains one AP2 domain. There are 15 members in this subfamily including ATERF-3, ATERF-4, ATERF-7, and leafy petiole.
BnaA05G0270100ZS	N_WCS417_30m	N_Control	852.77	1978.16	1415.46	-1.21419	0.0986212	-12.3116	7.84258e-35	6.44137e-33	Down	N_WCS417_30m-N_Control	RNC	--	--	--
BnaA09G0044300ZS	N_WCS417_30m	N_Control	1084.66	336.769	710.714	1.68825	0.137168	12.3079	8.21388e-35	6.73451e-33	Up	N_WCS417_30m-N_Control	RNC	AT3G29200	CM1	L-ascorbate peroxidase
BnaC01G0156000ZS	N_WCS417_30m	N_Control	2152.24	943.892	1548.07	1.18944	0.0967519	12.2937	9.78743e-35	8.01064e-33	Up	N_WCS417_30m-N_Control	RNC	AT4G22690	CYP706A1	member of CYP706A
BnaC06G0179900ZS	N_WCS417_30m	N_Control	10205.9	15810.5	13008.2	-0.631545	0.0514142	-12.2835	1.11098e-34	9.07705e-33	Normal	N_WCS417_30m-N_Control	RNC	AT3G52930	FBA8	Aldolase superfamily protein
BnaC04G0515200ZS	N_WCS417_30m	N_Control	662.783	1670.31	1166.54	-1.3334	0.10865	-12.2724	1.2745e-34	1.03949e-32	Down	N_WCS417_30m-N_Control	RNC	AT2G31880	SOBIR1	Encodes a putative leucine rich repeat transmembrane protein that is expressed in response to Pseudomonas syringae. Expression of SRRLK may be required for silencing via lsiRNAs. Regulates cell death and innate immunity.
BnaC02G0277500ZS	N_WCS417_30m	N_Control	315.631	1018.84	667.234	-1.6902	0.137896	-12.257	1.54013e-34	1.25396e-32	Down	N_WCS417_30m-N_Control	RNC	AT1G73540	NUDT21	nudix hydrolase homolog 21
BnaA05G0222900ZS	N_WCS417_30m	N_Control	2089.22	3885.91	2987.57	-0.895129	0.0731222	-12.2416	1.8643e-34	1.51526e-32	Normal	N_WCS417_30m-N_Control	RNC	--	--	--
BnaA05G0226200ZS	N_WCS417_30m	N_Control	1966.54	3824.55	2895.54	-0.959834	0.0785089	-12.2258	2.26364e-34	1.83665e-32	Normal	N_WCS417_30m-N_Control	RNC	--	--	--
BnaA09G0363700ZS	N_WCS417_30m	N_Control	1844.44	4053.47	2948.95	-1.13563	0.0929159	-12.2221	2.36835e-34	1.91828e-32	Down	N_WCS417_30m-N_Control	RNC	--	--	--
BnaC02G0399700ZS	N_WCS417_30m	N_Control	1999.04	850.389	1424.71	1.23306	0.10099	12.2097	2.75852e-34	2.23045e-32	Up	N_WCS417_30m-N_Control	RNC	AT5G45280	PAE11	Pectinacetylesterase family protein
BnaA05G0284900ZS	N_WCS417_30m	N_Control	2738.28	5261.56	3999.92	-0.942006	0.0771571	-12.2089	2.7853e-34	2.24822e-32	Normal	N_WCS417_30m-N_Control	RNC	--	--	--
BnaA01G0246800ZS	N_WCS417_30m	N_Control	2211.83	4244.63	3228.23	-0.940695	0.0770507	-12.2088	2.7906e-34	2.24862e-32	Normal	N_WCS417_30m-N_Control	RNC	--	--	--
BnaA06G0416500ZS	N_WCS417_30m	N_Control	2890.53	1437.72	2164.12	1.00764	0.0826267	12.1951	3.30266e-34	2.65666e-32	Up	N_WCS417_30m-N_Control	RNC	AT5G47450	TIP2;3	Tonoplast intrinsic protein, transports ammonium (NH3) and methylammonium across the tonoplast membrane, gene expression shows diurnal regulation and is upregulated by ammonium (NH3).
BnaA05G0289200ZS	N_WCS417_30m	N_Control	1160.9	2617.49	1889.2	-1.17287	0.0961865	-12.1937	3.35643e-34	2.69528e-32	Down	N_WCS417_30m-N_Control	RNC	--	--	--
BnaC09G0087500ZS	N_WCS417_30m	N_Control	998.3	2235.42	1616.86	-1.16293	0.0954643	-12.1818	3.88449e-34	3.11398e-32	Down	N_WCS417_30m-N_Control	RNC	AT5G65300	SUPA	--
BnaA07G0249300ZS	N_WCS417_30m	N_Control	8.73603	308.55	158.643	-5.15591	0.42354	-12.1734	4.30904e-34	3.44841e-32	Down	N_WCS417_30m-N_Control	RNC	AT1G74930	ORA47	encodes a member of the DREB subfamily A-5 of ERF/AP2 transcription factor family. The protein contains one AP2 domain. There are 15 members in this subfamily including RAP2.1, RAP2.9 and RAP2.10.
BnaA05G0218200ZS	N_WCS417_30m	N_Control	1839.68	3472.19	2655.94	-0.916421	0.0753619	-12.1603	5.05864e-34	4.04139e-32	Normal	N_WCS417_30m-N_Control	RNC	--	--	--
BnaC08G0436100ZS	N_WCS417_30m	N_Control	1030.97	305.762	668.368	1.75482	0.144317	12.1595	5.10952e-34	4.07509e-32	Up	N_WCS417_30m-N_Control	RNC	AT2G23960	--	Class I glutamine amidotransferase-like superfamily protein
Bnascaffold0026G0019400ZS	N_WCS417_30m	N_Control	2145.6	4059.79	3102.69	-0.920107	0.0756747	-12.1587	5.1561e-34	4.10524e-32	Normal	N_WCS417_30m-N_Control	RNC	--	--	--
BnaA06G0247900ZS	N_WCS417_30m	N_Control	1455.21	2920.59	2187.9	-1.00502	0.0827246	-12.149	5.80432e-34	4.6135e-32	Down	N_WCS417_30m-N_Control	RNC	--	--	--
BnaC09G0049500ZS	N_WCS417_30m	N_Control	1939.54	821.224	1380.38	1.23941	0.102044	12.1458	6.03716e-34	4.79043e-32	Up	N_WCS417_30m-N_Control	RNC	AT5G26340	STP13	Encodes a protein with high affinity, hexose-specific/H+ symporter activity. The activity of the transporter appears to be negatively regulated by phosphorylation. Importantly, microarray analysis, as well as the study of the expression of this gene in mutants involved in programmed cell death (PCD) demonstrated a tight correlation between this gene's expression and PCD.
BnaC07G0102200ZS	N_WCS417_30m	N_Control	1716.75	632.265	1174.51	1.44247	0.118779	12.1441	6.16216e-34	4.88135e-32	Up	N_WCS417_30m-N_Control	RNC	AT3G24500	MBF1C	One of three genes in A. thaliana encoding multiprotein bridging factor 1, a highly conserved transcriptional coactivator. May serve as a bridging factor between a bZIP factor and TBP. Its expression is specifically elevated in response to pathogen infection, salinity, drought, heat, hydrogen peroxide, and application of abscisic acid or salicylic acid. Constitutive expression enhances the tolera…
BnaA05G0204400ZS	N_WCS417_30m	N_Control	1333.14	2733.2	2033.17	-1.03597	0.0853284	-12.141	6.40221e-34	5.06294e-32	Down	N_WCS417_30m-N_Control	RNC	--	--	--
BnaA10G0274900ZS	N_WCS417_30m	N_Control	3588.28	1872.6	2730.44	0.938063	0.0773651	12.1251	7.77289e-34	6.12864e-32	Normal	N_WCS417_30m-N_Control	RNC	AT5G05440	RCAR8	Encodes a member of the PYR (pyrabactin resistance )/PYL(PYR1-like)/RCAR (regulatory components of ABA receptor) family proteins with 14 members. PYR/PYL/RCAR family proteins function as abscisic acid sensors. Mediate ABA-dependent regulation of protein phosphatase 2Cs ABI1 and ABI2.
Bnascaffold0027G0031500ZS	N_WCS417_30m	N_Control	4113.37	7278.74	5696.06	-0.823145	0.0678876	-12.1251	7.776e-34	6.12864e-32	Normal	N_WCS417_30m-N_Control	RNC	--	--	--
Bnascaffold0025G0012200ZS	N_WCS417_30m	N_Control	1045.04	2289.2	1667.12	-1.13119	0.0933607	-12.1163	8.65468e-34	6.8097e-32	Down	N_WCS417_30m-N_Control	RNC	--	--	--
BnaA09G0337300ZS	N_WCS417_30m	N_Control	1763.76	3401.75	2582.75	-0.947875	0.0782484	-12.1137	8.94001e-34	7.02241e-32	Normal	N_WCS417_30m-N_Control	RNC	--	--	--
BnaA06G0283700ZS	N_WCS417_30m	N_Control	127.088	611.688	369.388	-2.26631	0.187107	-12.1124	9.08158e-34	7.12166e-32	Down	N_WCS417_30m-N_Control	RNC	AT5G63130	--	Octicosapeptide/Phox/Bem1p family protein
BnaA06G0043600ZS	N_WCS417_30m	N_Control	428.69	51.7389	240.215	3.05147	0.251979	12.11	9.34517e-34	7.31611e-32	Up	N_WCS417_30m-N_Control	RNC	AT1G23730	BCA3	beta carbonic anhydrase 3
BnaA05G0232500ZS	N_WCS417_30m	N_Control	1877.95	3528.74	2703.34	-0.910052	0.0751819	-12.1047	9.97583e-34	7.7968e-32	Normal	N_WCS417_30m-N_Control	RNC	--	--	--
BnaA09G0285100ZS	N_WCS417_30m	N_Control	1568.03	3073.48	2320.75	-0.970907	0.0802739	-12.0949	1.12337e-33	8.76528e-32	Normal	N_WCS417_30m-N_Control	RNC	--	--	--
BnaA09G0301900ZS	N_WCS417_30m	N_Control	2832.19	5152.03	3992.11	-0.863524	0.0714416	-12.0871	1.23537e-33	9.62316e-32	Normal	N_WCS417_30m-N_Control	RNC	--	--	--
BnaA09G0364000ZS	N_WCS417_30m	N_Control	2513.33	4745.12	3629.22	-0.916731	0.0759748	-12.0662	1.59248e-33	1.23843e-31	Normal	N_WCS417_30m-N_Control	RNC	--	--	--
BnaC01G0155400ZS	N_WCS417_30m	N_Control	878.746	248.371	563.558	1.82332	0.151113	12.0659	1.59812e-33	1.24075e-31	Up	N_WCS417_30m-N_Control	RNC	AT4G22590	TPPG	Haloacid dehalogenase-like hydrolase (HAD) superfamily protein
BnaA02G0025800ZS	N_WCS417_30m	N_Control	2212.83	1003.59	1608.21	1.141	0.0945668	12.0656	1.60519e-33	1.24418e-31	Up	N_WCS417_30m-N_Control	RNC	AT5G07440	GDH2	Encodes the alpha-subunit of the glutamate dehydrogenase. The enzyme is almost exclusively found in the mitochondria of stem and leaf companion cells.
Bnascaffold1532G0000100ZS	N_WCS417_30m	N_Control	2011.67	3742.17	2876.92	-0.895376	0.0742397	-12.0606	1.70537e-33	1.31965e-31	Normal	N_WCS417_30m-N_Control	RNC	--	--	--
Bnascaffold0025G0012700ZS	N_WCS417_30m	N_Control	1489.88	2949.32	2219.6	-0.98504	0.0817603	-12.0479	1.98967e-33	1.5371e-31	Normal	N_WCS417_30m-N_Control	RNC	--	--	--
BnaA09G0353200ZS	N_WCS417_30m	N_Control	1705.86	3329.06	2517.46	-0.964787	0.0800977	-12.0451	2.05774e-33	1.58707e-31	Normal	N_WCS417_30m-N_Control	RNC	--	--	--
BnaA09G0342700ZS	N_WCS417_30m	N_Control	3155.22	5651.75	4403.49	-0.841035	0.0698553	-12.0397	2.19819e-33	1.69261e-31	Normal	N_WCS417_30m-N_Control	RNC	--	--	--
BnaC05G0504700ZS	N_WCS417_30m	N_Control	1408.47	521.036	964.752	1.43399	0.119157	12.0344	2.34214e-33	1.80049e-31	Up	N_WCS417_30m-N_Control	RNC	AT3G09350	Fes1A	Encodes one of the Arabidopsis orthologs of the human Hsp70-binding protein 1 (HspBP-1) and yeast Fes1p: Fes1A (AT3G09350), Fes1B (AT3G53800), Fes1C (AT5G02150). Fes1A is cytosolic and associates with cytosolic Hsp70. Mutants showed increased heat-sensitive phenotype suggestion the involvement of Fes1A in acquired thermotolerance. Does not have nucleotide exchange factor activity in vitro.
BnaC08G0091300ZS	N_WCS417_30m	N_Control	2091.39	3839.17	2965.28	-0.876231	0.0728442	-12.0288	2.50654e-33	1.92371e-31	Normal	N_WCS417_30m-N_Control	RNC	--	--	--
BnaA01G0242900ZS	N_WCS417_30m	N_Control	2793.2	5249.57	4021.39	-0.910041	0.0756682	-12.0267	2.57122e-33	1.97011e-31	Normal	N_WCS417_30m-N_Control	RNC	--	--	--
BnaA09G0363400ZS	N_WCS417_30m	N_Control	1565.45	3092.09	2328.77	-0.981967	0.0816757	-12.0228	2.69834e-33	2.06414e-31	Normal	N_WCS417_30m-N_Control	RNC	--	--	--
Bnascaffold0026G0014300ZS	N_WCS417_30m	N_Control	3526.54	6448	4987.27	-0.87036	0.0724056	-12.0206	2.76883e-33	2.11461e-31	Normal	N_WCS417_30m-N_Control	RNC	--	--	--
BnaA05G0213700ZS	N_WCS417_30m	N_Control	1620.32	3363.83	2492.07	-1.05382	0.0877105	-12.0147	2.97314e-33	2.26695e-31	Down	N_WCS417_30m-N_Control	RNC	--	--	--
BnaC02G0197600ZS	N_WCS417_30m	N_Control	374.672	1126.89	750.78	-1.58856	0.132344	-12.0033	3.41273e-33	2.59789e-31	Down	N_WCS417_30m-N_Control	RNC	AT1G64980	CDI	Encodes a putative nucleotide-diphospho-sugar transferase required for pollen germination and tube growth.
BnaA05G0140100ZS	N_WCS417_30m	N_Control	1710.85	687.92	1199.38	1.31369	0.10955	11.9917	3.92622e-33	2.98392e-31	Up	N_WCS417_30m-N_Control	RNC	AT2G29500	HSP17.6B	HSP20-like chaperones superfamily protein
BnaC06G0140000ZS	N_WCS417_30m	N_Control	3246.18	1686.37	2466.28	0.944651	0.0788096	11.9865	4.18222e-33	3.17333e-31	Normal	N_WCS417_30m-N_Control	RNC	AT1G55450	--	S-adenosyl-L-methionine-dependent methyltransferases superfamily protein
BnaA05G0442100ZS	N_WCS417_30m	N_Control	1296.24	452.682	874.463	1.51872	0.126817	11.9757	4.76656e-33	3.61087e-31	Up	N_WCS417_30m-N_Control	RNC	AT3G09350	Fes1A	Encodes one of the Arabidopsis orthologs of the human Hsp70-binding protein 1 (HspBP-1) and yeast Fes1p: Fes1A (AT3G09350), Fes1B (AT3G53800), Fes1C (AT5G02150). Fes1A is cytosolic and associates with cytosolic Hsp70. Mutants showed increased heat-sensitive phenotype suggestion the involvement of Fes1A in acquired thermotolerance. Does not have nucleotide exchange factor activity in vitro.
BnaA02G0407800ZS	N_WCS417_30m	N_Control	10432.5	6615.83	8524.16	0.657026	0.0548896	11.9699	5.10637e-33	3.86203e-31	Normal	N_WCS417_30m-N_Control	RNC	AT5G64260	EXL2	EXORDIUM like 2
BnaA05G0474400ZS	N_WCS417_30m	N_Control	231.629	827.233	529.431	-1.83654	0.153471	-11.9667	5.30823e-33	4.00823e-31	Down	N_WCS417_30m-N_Control	RNC	AT3G05490	RALFL22	Member of a diversely expressed predicted peptide family showing sequence similarity to tobacco Rapid Alkalinization Factor (RALF), and is believed to play an essential role in the physiology of Arabidopsis. Consists of a single exon and is characterized by a conserved C-terminal motif and N-terminal signal peptide.
Bnascaffold1516G0001300ZS	N_WCS417_30m	N_Control	1711.4	3267.26	2489.33	-0.932805	0.0780177	-11.9563	6.01622e-33	4.53551e-31	Normal	N_WCS417_30m-N_Control	RNC	--	--	--
BnaC01G0450900ZS	N_WCS417_30m	N_Control	513.099	1349.42	931.26	-1.39496	0.116674	-11.956	6.03808e-33	4.54467e-31	Down	N_WCS417_30m-N_Control	RNC	AT3G13310	DJC66	Chaperone DnaJ-domain superfamily protein
Bnascaffold0919G0000100ZS	N_WCS417_30m	N_Control	1915.59	3588.78	2752.18	-0.90584	0.0758303	-11.9456	6.84359e-33	5.14269e-31	Normal	N_WCS417_30m-N_Control	RNC	--	--	--
BnaA06G0169300ZS	N_WCS417_30m	N_Control	384.988	29.7834	207.386	3.68327	0.30877	11.9288	8.37512e-33	6.28349e-31	Up	N_WCS417_30m-N_Control	RNC	AT5G08640	FLS1	Encodes a flavonol synthase that catalyzes formation of flavonols from dihydroflavonols. Co-expressed with CHI and CHS (qRT-PCR).
BnaA03G0431300ZS	N_WCS417_30m	N_Control	1583.24	637.966	1110.6	1.31128	0.110086	11.9115	1.03115e-32	7.72391e-31	Up	N_WCS417_30m-N_Control	RNC	AT4G12720	NUDT7	Encodes a protein with ADP-ribose hydrolase activity. Negatively regulates EDS1-conditioned plant defense and programmed cell death.
BnaA04G0221200ZS	N_WCS417_30m	N_Control	567.196	1451.16	1009.18	-1.35491	0.113821	-11.9038	1.13077e-32	8.45653e-31	Down	N_WCS417_30m-N_Control	RNC	AT1G29930	LHCB1.3	Subunit of light-harvesting complex II (LHCII),which absorbs light and transfers energy to the photosynthetic reaction center.
BnaA01G0423500ZS	N_WCS417_30m	N_Control	2662.33	1314.9	1988.62	1.01767	0.0855045	11.9019	1.15691e-32	8.63825e-31	Up	N_WCS417_30m-N_Control	RNC	AT3G08710	TRXh9	Associated to plasma membrane. Moves cell to cell, suggesting a role in intercellular communication.
Bnascaffold0027G0043100ZS	N_WCS417_30m	N_Control	7666.69	13797.9	10732.3	-0.847638	0.0712816	-11.8914	1.31204e-32	9.78095e-31	Normal	N_WCS417_30m-N_Control	RNC	--	--	--
BnaA05G0222700ZS	N_WCS417_30m	N_Control	1157.01	2458.05	1807.53	-1.08754	0.0915471	-11.8795	1.51226e-32	1.12557e-30	Down	N_WCS417_30m-N_Control	RNC	--	--	--
BnaA03G0045200ZS	N_WCS417_30m	N_Control	3001.46	1546.21	2273.83	0.956922	0.0805678	11.8772	1.55457e-32	1.15522e-30	Normal	N_WCS417_30m-N_Control	RNC	AT5G11670	NADP-ME2	The malic enzyme (EC 1.1.1.40) encoded by AtNADP-ME2 is presumably a cytosolic enzyme involved in malate metabolism and possibly assisting the oxidative pentose phosphate pathway. AtNADP-ME2 counts for the major part of NADP-ME activity in mature tissues of Arabidopsis.
Bnascaffold0551G0000400ZS	N_WCS417_30m	N_Control	1696.97	3304.91	2500.94	-0.961799	0.0810133	-11.8721	1.65235e-32	1.22594e-30	Normal	N_WCS417_30m-N_Control	RNC	--	--	--
BnaC03G0342000ZS	N_WCS417_30m	N_Control	661.369	1624.65	1143.01	-1.29634	0.109215	-11.8697	1.70152e-32	1.26041e-30	Down	N_WCS417_30m-N_Control	RNC	AT5G15140	PEG9	Galactose mutarotase-like superfamily protein
BnaA05G0396800ZS	N_WCS417_30m	N_Control	156.318	718.088	437.203	-2.19825	0.185218	-11.8685	1.72598e-32	1.27652e-30	Down	N_WCS417_30m-N_Control	RNC	AT3G15670	LEA76	Late embryogenesis abundant protein (LEA) family protein
Bnascaffold0027G0055800ZS	N_WCS417_30m	N_Control	2224.86	4073.28	3149.07	-0.872238	0.0735385	-11.861	1.88776e-32	1.39397e-30	Normal	N_WCS417_30m-N_Control	RNC	--	--	--
BnaC05G0327100ZS	N_WCS417_30m	N_Control	2387.69	1150.55	1769.12	1.05338	0.0889243	11.8458	2.26254e-32	1.66808e-30	Up	N_WCS417_30m-N_Control	RNC	AT1G35580	NIN2	CINV1 / A/N-InvG is an alkaline/neutral invertase that breaks sucrose down into fructose and glucose (GH100). The exact localization of CINV1 remains under investigation but there is evidence that fluorescently-tagged CINV1 localizes to the cytoplasm. atinvg mutants have reduced root growth, reduced invertase activity, and increased expression of antioxidant genes under basal conditions. The leve…
BnaA05G0287000ZS	N_WCS417_30m	N_Control	1875.2	3477.8	2676.5	-0.891076	0.0752733	-11.8379	2.48659e-32	1.83038e-30	Normal	N_WCS417_30m-N_Control	RNC	--	--	--
BnaA05G0305600ZS	N_WCS417_30m	N_Control	1407.69	2896.95	2152.32	-1.04078	0.0879701	-11.8311	2.69709e-32	1.98221e-30	Down	N_WCS417_30m-N_Control	RNC	--	--	--
Bnascaffold1759G0000100ZS	N_WCS417_30m	N_Control	1469.2	2929.5	2199.35	-0.995567	0.0841537	-11.8304	2.71995e-32	1.99588e-30	Normal	N_WCS417_30m-N_Control	RNC	--	--	--
Bnascaffold2033G0000200ZS	N_WCS417_30m	N_Control	2663.31	4867.87	3765.59	-0.869919	0.0737437	-11.7965	4.06766e-32	2.98015e-30	Normal	N_WCS417_30m-N_Control	RNC	--	--	--
BnaC01G0309800ZS	N_WCS417_30m	N_Control	2727.06	5056.93	3891.99	-0.890544	0.0754934	-11.7963	4.07761e-32	2.98277e-30	Normal	N_WCS417_30m-N_Control	RNC	--	--	--
Bnascaffold0027G0001800ZS	N_WCS417_30m	N_Control	950.539	2089.27	1519.9	-1.13581	0.0962942	-11.7952	4.13412e-32	3.01939e-30	Down	N_WCS417_30m-N_Control	RNC	--	--	--
BnaC07G0451800ZS	N_WCS417_30m	N_Control	1081.16	360.608	720.886	1.58412	0.134442	11.7829	4.78238e-32	3.48742e-30	Up	N_WCS417_30m-N_Control	RNC	AT4G23570	SGT1A	Closely related to SGT1B, may function in SCF(TIR1) mediated protein degradation. AtSGT1a and AtSGT1b are functionally redundant in the resistance to pathogenes. AtSGT1b was more highly expressed than AtSGT1. The N-terminal TPR domain of AtSGT1a reduces the steady-state level of Arabidopsis SGT1 proteins whereas the same domain from AtSGT1b enhances SGT1 accumulation. The TPR domain is dispensabl…
BnaA09G0286000ZS	N_WCS417_30m	N_Control	1676.71	3231.71	2454.21	-0.946669	0.08035	-11.7818	4.84403e-32	3.52687e-30	Normal	N_WCS417_30m-N_Control	RNC	--	--	--
BnaA01G0253200ZS	N_WCS417_30m	N_Control	4191.28	7280.2	5735.74	-0.796384	0.0676181	-11.7777	5.08815e-32	3.69887e-30	Normal	N_WCS417_30m-N_Control	RNC	--	--	--
BnaA05G0292800ZS	N_WCS417_30m	N_Control	1528.17	2995.01	2261.59	-0.970783	0.0825022	-11.7668	5.79105e-32	4.20332e-30	Normal	N_WCS417_30m-N_Control	RNC	--	--	--
Bnascaffold0027G0058000ZS	N_WCS417_30m	N_Control	1681.16	3235.37	2458.26	-0.944519	0.0802984	-11.7626	6.08196e-32	4.40763e-30	Normal	N_WCS417_30m-N_Control	RNC	--	--	--
BnaA05G0242900ZS	N_WCS417_30m	N_Control	2004.22	3683.65	2843.94	-0.877979	0.0747809	-11.7407	7.8854e-32	5.70577e-30	Normal	N_WCS417_30m-N_Control	RNC	--	--	--
BnaA05G0236000ZS	N_WCS417_30m	N_Control	1970.81	4075.79	3023.3	-1.04864	0.0893403	-11.7376	8.17431e-32	5.90569e-30	Down	N_WCS417_30m-N_Control	RNC	--	--	--
BnaA05G0307700ZS	N_WCS417_30m	N_Control	2422.91	4329.76	3376.34	-0.837503	0.0713721	-11.7343	8.50006e-32	6.13157e-30	Normal	N_WCS417_30m-N_Control	RNC	--	--	--
BnaA09G0304900ZS	N_WCS417_30m	N_Control	1118.81	2345.8	1732.3	-1.06827	0.0910658	-11.7308	8.86487e-32	6.38489e-30	Down	N_WCS417_30m-N_Control	RNC	--	--	--
BnaA03G0286300ZS	N_WCS417_30m	N_Control	418.455	51.6109	235.033	3.01796	0.257283	11.7301	8.93323e-32	6.42424e-30	Up	N_WCS417_30m-N_Control	RNC	AT3G02140	TMAC2	Encodes a protein that acts in the nucleus and is an important negative regulator of ABA and salt stress responses, and could play a critical role in controlling root elongation, floral initiation and starch degradation.
BnaC01G0476100ZS	N_WCS417_30m	N_Control	3481.44	1844.56	2663	0.916706	0.0781869	11.7246	9.54032e-32	6.8503e-30	Normal	N_WCS417_30m-N_Control	RNC	AT3G09270	GSTU8	Encodes glutathione transferase belonging to the tau class of GSTs. Naming convention according to Wagner et al. (2002).
BnaA05G0266800ZS	N_WCS417_30m	N_Control	1464.35	2862.96	2163.65	-0.967111	0.0824938	-11.7234	9.66572e-32	6.92972e-30	Normal	N_WCS417_30m-N_Control	RNC	--	--	--
Bnascaffold0026G0019000ZS	N_WCS417_30m	N_Control	2667.61	4896.46	3782.04	-0.876226	0.0747529	-11.7216	9.87475e-32	7.06875e-30	Normal	N_WCS417_30m-N_Control	RNC	--	--	--
BnaA09G0337800ZS	N_WCS417_30m	N_Control	1365.3	2685.41	2025.35	-0.975983	0.0834046	-11.7018	1.24782e-31	8.91877e-30	Normal	N_WCS417_30m-N_Control	RNC	--	--	--
Bnascaffold0026G0040300ZS	N_WCS417_30m	N_Control	3051.78	5535.26	4293.52	-0.858799	0.0734402	-11.6938	1.37043e-31	9.78018e-30	Normal	N_WCS417_30m-N_Control	RNC	--	--	--
BnaA09G0287000ZS	N_WCS417_30m	N_Control	902.424	2116.67	1509.55	-1.22965	0.105282	-11.6796	1.62081e-31	1.15494e-29	Down	N_WCS417_30m-N_Control	RNC	--	--	--
Bnascaffold0027G0066600ZS	N_WCS417_30m	N_Control	2889.91	4943.05	3916.48	-0.774431	0.0663103	-11.6789	1.63393e-31	1.16252e-29	Normal	N_WCS417_30m-N_Control	RNC	--	--	--
Bnascaffold0027G0041900ZS	N_WCS417_30m	N_Control	2176.19	4044.28	3110.23	-0.893926	0.0766295	-11.6656	1.9112e-31	1.35773e-29	Normal	N_WCS417_30m-N_Control	RNC	--	--	--
BnaA03G0229900ZS	N_WCS417_30m	N_Control	1410.56	542.416	976.487	1.37906	0.11826	11.6613	2.01026e-31	1.42595e-29	Up	N_WCS417_30m-N_Control	RNC	AT2G29450	GSTU5	Encodes a member of the TAU glutathione S-transferase gene family. Gene expression is induced by exposure to auxin, pathogen and herbicides. Naming convention according to Wagner et al. (2002)
BnaA08G0105200ZS	N_WCS417_30m	N_Control	332.784	1013.33	673.056	-1.60681	0.137794	-11.661	2.01764e-31	1.42901e-29	Down	N_WCS417_30m-N_Control	RNC	AT4G17490	ERF6	Encodes a member of the ERF (ethylene response factor) subfamily B-3 of ERF/AP2 transcription factor family (ATERF-6). The protein contains one AP2 domain. There are 18 members in this subfamily including ATERF-1, ATERF-2, AND ATERF-5. It is involved in the response to reactive oxygen species and light stress.
Bnascaffold0026G0019200ZS	N_WCS417_30m	N_Control	2782.8	4945.75	3864.28	-0.829849	0.0711674	-11.6605	2.02793e-31	1.43413e-29	Normal	N_WCS417_30m-N_Control	RNC	--	--	--
BnaA09G0342400ZS	N_WCS417_30m	N_Control	1572.92	3033.35	2303.13	-0.947697	0.0812897	-11.6583	2.08236e-31	1.4704e-29	Normal	N_WCS417_30m-N_Control	RNC	--	--	--
BnaA05G0198900ZS	N_WCS417_30m	N_Control	674.942	1594.61	1134.77	-1.24041	0.106468	-11.6505	2.28094e-31	1.6082e-29	Down	N_WCS417_30m-N_Control	RNC	--	--	--
BnaA01G0252600ZS	N_WCS417_30m	N_Control	4398.04	7478.98	5938.51	-0.765834	0.0658361	-11.6324	2.81969e-31	1.98506e-29	Normal	N_WCS417_30m-N_Control	RNC	--	--	--
BnaC03G0189500ZS	N_WCS417_30m	N_Control	2823.42	4830.56	3826.99	-0.77478	0.0666575	-11.6233	3.13741e-31	2.20542e-29	Normal	N_WCS417_30m-N_Control	RNC	AT2G33830	DRM2	Dormancy/auxin associated family protein
BnaA06G0235600ZS	N_WCS417_30m	N_Control	1253.36	2590.16	1921.76	-1.0468	0.0900885	-11.6197	3.27437e-31	2.29824e-29	Down	N_WCS417_30m-N_Control	RNC	--	--	--
BnaC08G0091500ZS	N_WCS417_30m	N_Control	3649.88	6292.26	4971.07	-0.78546	0.067608	-11.6179	3.34434e-31	2.34384e-29	Normal	N_WCS417_30m-N_Control	RNC	--	--	--
BnaC01G0308600ZS	N_WCS417_30m	N_Control	2088	3849.92	2968.96	-0.882605	0.0760045	-11.6125	3.5593e-31	2.49076e-29	Normal	N_WCS417_30m-N_Control	RNC	--	--	--
BnaA05G0228300ZS	N_WCS417_30m	N_Control	2086.49	3934.05	3010.27	-0.914568	0.0788177	-11.6036	3.95135e-31	2.76099e-29	Normal	N_WCS417_30m-N_Control	RNC	--	--	--
BnaA05G0233000ZS	N_WCS417_30m	N_Control	1673.79	3233.62	2453.7	-0.950216	0.0819752	-11.5915	4.55056e-31	3.17495e-29	Normal	N_WCS417_30m-N_Control	RNC	--	--	--
BnaA05G0252000ZS	N_WCS417_30m	N_Control	1429.46	2772.38	2100.92	-0.955577	0.0824479	-11.5901	4.62753e-31	3.22385e-29	Normal	N_WCS417_30m-N_Control	RNC	--	--	--
BnaA03G0073900ZS	N_WCS417_30m	N_Control	187.695	727.643	457.669	-1.95566	0.168887	-11.5797	5.22177e-31	3.63243e-29	Down	N_WCS417_30m-N_Control	RNC	AT3G03280	--	--
BnaA08G0250600ZS	N_WCS417_30m	N_Control	1795.48	3318.12	2556.8	-0.88606	0.0765216	-11.5792	5.25261e-31	3.64846e-29	Normal	N_WCS417_30m-N_Control	RNC	AT1G19770	PUP14	Member of a family of proteins related to PUP1, a purine transporter. May be involved in the transport of purine and purine derivatives such as cytokinins, across the plasma membrane.
BnaC09G0592400ZS	N_WCS417_30m	N_Control	2421.76	1113.66	1767.71	1.12009	0.0968102	11.5699	5.85348e-31	4.0598e-29	Up	N_WCS417_30m-N_Control	RNC	AT5G05440	RCAR8	Encodes a member of the PYR (pyrabactin resistance )/PYL(PYR1-like)/RCAR (regulatory components of ABA receptor) family proteins with 14 members. PYR/PYL/RCAR family proteins function as abscisic acid sensors. Mediate ABA-dependent regulation of protein phosphatase 2Cs ABI1 and ABI2.
BnaA01G0253300ZS	N_WCS417_30m	N_Control	3968.44	6969.03	5468.73	-0.812194	0.0701999	-11.5697	5.86666e-31	4.06292e-29	Normal	N_WCS417_30m-N_Control	RNC	--	--	--
BnaA03G0581400ZS	N_WCS417_30m	N_Control	593.237	122.397	357.817	2.27858	0.197055	11.5632	6.33409e-31	4.38016e-29	Up	N_WCS417_30m-N_Control	RNC	AT1G61360	--	S-locus lectin protein kinase family protein
BnaA05G0293100ZS	N_WCS417_30m	N_Control	1601.84	3073.81	2337.83	-0.940584	0.081461	-11.5464	7.6949e-31	5.31334e-29	Normal	N_WCS417_30m-N_Control	RNC	--	--	--
Bnascaffold0027G0002100ZS	N_WCS417_30m	N_Control	829.035	1832.65	1330.84	-1.14454	0.0991642	-11.5419	8.11246e-31	5.59342e-29	Down	N_WCS417_30m-N_Control	RNC	--	--	--
Bnascaffold0027G0051400ZS	N_WCS417_30m	N_Control	2630.2	4648.71	3639.46	-0.821436	0.0712126	-11.535	8.79007e-31	6.0517e-29	Normal	N_WCS417_30m-N_Control	RNC	--	--	--
Bnascaffold0040G0000900ZS	N_WCS417_30m	N_Control	1497.29	2889.41	2193.35	-0.948376	0.0823016	-11.5232	1.0082e-30	6.93094e-29	Normal	N_WCS417_30m-N_Control	RNC	--	--	--
BnaC08G0088700ZS	N_WCS417_30m	N_Control	2071.84	3755.61	2913.73	-0.857921	0.0745005	-11.5156	1.10037e-30	7.55353e-29	Normal	N_WCS417_30m-N_Control	RNC	--	--	--
BnaC07G0342100ZS	N_WCS417_30m	N_Control	908.954	1999.55	1454.25	-1.13705	0.0987832	-11.5106	1.1672e-30	8.00054e-29	Down	N_WCS417_30m-N_Control	RNC	AT5G27120	--	SAR DNA-binding protein, putative, strong similarity to SAR DNA-binding protein-1 (Pisum sativum) GI:3132696; contains Pfam profile PF01798: Putative snoRNA binding domain; has similarity to MAR binding NOP58 protein
Bnascaffold0027G0044900ZS	N_WCS417_30m	N_Control	1966.26	3593.91	2780.08	-0.870018	0.0756127	-11.5062	1.22713e-30	8.39905e-29	Normal	N_WCS417_30m-N_Control	RNC	--	--	--
BnaA07G0009900ZS	N_WCS417_30m	N_Control	201.963	744.672	473.317	-1.88326	0.163828	-11.4953	1.39225e-30	9.51526e-29	Down	N_WCS417_30m-N_Control	RNC	AT2G19710	ISTL5	Regulator of Vps4 activity in the MVB pathway protein
BnaA09G0250600ZS	N_WCS417_30m	N_Control	999.926	2139.89	1569.91	-1.09793	0.0955611	-11.4893	1.49376e-30	1.01942e-28	Down	N_WCS417_30m-N_Control	RNC	AT4G11280	ATACS6	encodes a a member of the 1-aminocyclopropane-1-carboxylate (ACC) synthase (S-adenosyl-L-methionine methylthioadenosine-lyase, EC 4.4.1.14) gene family
BnaC06G0110600ZS	N_WCS417_30m	N_Control	2592.44	4546.09	3569.26	-0.810498	0.0706127	-11.4781	1.70038e-30	1.15873e-28	Normal	N_WCS417_30m-N_Control	RNC	AT1G33140	PGY2	Encodes ribosomal protein L9. Identified in a screen for enhancers of as1. as1/pgy double mutants show defects in leaf vascular patterning and adaxial cell fate. Double mutant analysis indicates pgy genes function in the same pathway as REV, KAN1 and KAN2.
BnaC05G0449300ZS	N_WCS417_30m	N_Control	1614.19	685.61	1149.9	1.23499	0.107609	11.4767	1.72736e-30	1.17541e-28	Up	N_WCS417_30m-N_Control	RNC	AT3G16530	--	Lectin like protein whose expression is induced upon treatment with chitin oligomers.
BnaC05G0037000ZS	N_WCS417_30m	N_Control	2479.06	1184.48	1831.77	1.0651	0.0928376	11.4727	1.80917e-30	1.22929e-28	Up	N_WCS417_30m-N_Control	RNC	AT2G32210	AthCYSTM6	--
BnaA09G0362700ZS	N_WCS417_30m	N_Control	1626.16	3069.52	2347.84	-0.916523	0.0799387	-11.4653	1.97018e-30	1.33675e-28	Normal	N_WCS417_30m-N_Control	RNC	--	--	--
BnaC08G0248200ZS	N_WCS417_30m	N_Control	103.019	513.585	308.302	-2.31781	0.202241	-11.4606	2.08005e-30	1.40926e-28	Down	N_WCS417_30m-N_Control	RNC	AT1G18740	B1L	Protein of unknown function (DUF793)
BnaA01G0243400ZS	N_WCS417_30m	N_Control	1372.79	2662.16	2017.48	-0.955528	0.083489	-11.445	2.49225e-30	1.68609e-28	Normal	N_WCS417_30m-N_Control	RNC	--	--	--
Bnascaffold0027G0010600ZS	N_WCS417_30m	N_Control	1630.2	3106.62	2368.41	-0.930044	0.0812761	-11.443	2.5483e-30	1.72152e-28	Normal	N_WCS417_30m-N_Control	RNC	--	--	--
BnaA05G0250900ZS	N_WCS417_30m	N_Control	759.119	1774.43	1266.78	-1.22499	0.107146	-11.4329	2.86331e-30	1.93154e-28	Down	N_WCS417_30m-N_Control	RNC	--	--	--
Bnascaffold0027G0026200ZS	N_WCS417_30m	N_Control	1659.42	3164.26	2411.84	-0.931516	0.0814897	-11.4311	2.92415e-30	1.96974e-28	Normal	N_WCS417_30m-N_Control	RNC	--	--	--
BnaA05G0206500ZS	N_WCS417_30m	N_Control	1159.28	2346.86	1753.07	-1.01767	0.0890825	-11.4239	3.17565e-30	2.13608e-28	Down	N_WCS417_30m-N_Control	RNC	--	--	--
BnaC08G0253200ZS	N_WCS417_30m	N_Control	1152.05	421.028	786.541	1.4524	0.12724	11.4147	3.53049e-30	2.37135e-28	Up	N_WCS417_30m-N_Control	RNC	AT1G19380	--	Protein of unknown function (DUF1195)
BnaA09G0302500ZS	N_WCS417_30m	N_Control	1069.51	2447.81	1758.66	-1.19393	0.104609	-11.4132	3.59134e-30	2.40877e-28	Down	N_WCS417_30m-N_Control	RNC	--	--	--
BnaA02G0394000ZS	N_WCS417_30m	N_Control	235.731	834.151	534.941	-1.82201	0.159647	-11.4127	3.61232e-30	2.41938e-28	Down	N_WCS417_30m-N_Control	RNC	AT5G61600	ERF104	encodes a member of the ERF (ethylene response factor) subfamily B-3 of ERF/AP2 transcription factor family. The protein contains one AP2 domain. There are 18 members in this subfamily including ATERF-1, ATERF-2, AND ATERF-5.
Bnascaffold1516G0001000ZS	N_WCS417_30m	N_Control	1840.54	3458.32	2649.43	-0.909624	0.0797338	-11.4083	3.8023e-30	2.54298e-28	Normal	N_WCS417_30m-N_Control	RNC	--	--	--
Bnascaffold0025G0013100ZS	N_WCS417_30m	N_Control	2625.02	4705.42	3665.22	-0.841818	0.0738311	-11.4019	4.08924e-30	2.73098e-28	Normal	N_WCS417_30m-N_Control	RNC	--	--	--
BnaC04G0532900ZS	N_WCS417_30m	N_Control	739.341	1680.56	1209.95	-1.18454	0.103906	-11.4002	4.17356e-30	2.78332e-28	Down	N_WCS417_30m-N_Control	RNC	AT1G29930	LHCB1.3	Subunit of light-harvesting complex II (LHCII),which absorbs light and transfers energy to the photosynthetic reaction center.
BnaA09G0325800ZS	N_WCS417_30m	N_Control	4089.87	7472.51	5781.19	-0.869871	0.0763057	-11.3998	4.18967e-30	2.7901e-28	Normal	N_WCS417_30m-N_Control	RNC	--	--	--
BnaA09G0371800ZS	N_WCS417_30m	N_Control	1866.28	3480.09	2673.19	-0.89916	0.0789578	-11.3879	4.8063e-30	3.19619e-28	Normal	N_WCS417_30m-N_Control	RNC	--	--	--
BnaA03G0519500ZS	N_WCS417_30m	N_Control	2215.95	1041.88	1628.92	1.08847	0.0955984	11.3858	4.92074e-30	3.26765e-28	Up	N_WCS417_30m-N_Control	RNC	AT4G30530	GGP1	Encodes a gamma-glutamyl peptidase, outside the GGT family, that can hydrolyze gamma-glutamyl peptide bonds.
BnaC09G0428900ZS	N_WCS417_30m	N_Control	312.927	947.454	630.19	-1.59841	0.140389	-11.3856	4.93455e-30	3.27218e-28	Down	N_WCS417_30m-N_Control	RNC	AT5G59450	--	GRAS family transcription factor
BnaA09G0304700ZS	N_WCS417_30m	N_Control	1868.9	3791.62	2830.26	-1.02116	0.0897272	-11.3807	5.21728e-30	3.45477e-28	Down	N_WCS417_30m-N_Control	RNC	--	--	--
Bnascaffold0027G0025800ZS	N_WCS417_30m	N_Control	1758.37	3298.38	2528.38	-0.907746	0.0798146	-11.3732	5.68764e-30	3.76091e-28	Normal	N_WCS417_30m-N_Control	RNC	--	--	--
BnaC04G0160600ZS	N_WCS417_30m	N_Control	1516.22	2894.96	2205.59	-0.933053	0.0820887	-11.3664	6.14737e-30	4.05917e-28	Normal	N_WCS417_30m-N_Control	RNC	--	--	--
BnaC02G0066900ZS	N_WCS417_30m	N_Control	555.278	114.854	335.066	2.27392	0.200122	11.3626	6.41761e-30	4.23165e-28	Up	N_WCS417_30m-N_Control	RNC	AT5G15130	WRKY72	member of WRKY Transcription Factor; Group II-b; contribute to basal immunity.
BnaC07G0007400ZS	N_WCS417_30m	N_Control	2399.67	1136.74	1768.21	1.07726	0.0948139	11.3618	6.47971e-30	4.26658e-28	Up	N_WCS417_30m-N_Control	RNC	AT5G48930	HCT	At5g48930 has been shown to encode for the hydroxycinnamoyl-Coenzyme A shikimate/quinate hydroxycinnamoyltransferase (HCT) both synthesizing and catabolizing the hydroxycinnamoylesters (coumaroyl/caffeoyl shikimate and quinate) involved in the phenylpropanoid pathway. Influence on the accumulation of flavonoids which in turn inhibit auxin transport and reduce plant growth.
BnaC09G0004500ZS	N_WCS417_30m	N_Control	1273.95	484.698	879.324	1.39475	0.12284	11.3542	7.06979e-30	4.64858e-28	Up	N_WCS417_30m-N_Control	RNC	AT4G01700	--	Chitinase family protein
BnaC09G0491600ZS	N_WCS417_30m	N_Control	1258.87	468.018	863.444	1.42848	0.125858	11.3499	7.42199e-30	4.87332e-28	Up	N_WCS417_30m-N_Control	RNC	AT5G17330	GAD1	Encodes one of two isoforms of glutamate decarboxylase.
BnaC03G0624300ZS	N_WCS417_30m	N_Control	917.923	294.337	606.13	1.64115	0.14463	11.3472	7.65817e-30	5.02136e-28	Up	N_WCS417_30m-N_Control	RNC	AT3G47960	NPF2.10	Encodes a high-affinity, proton-dependent glucosinolate-specific transporter that is crucial for the transport of both methionine- and tryptophan-derived glucosinolates to seeds.
Bnascaffold0025G0012000ZS	N_WCS417_30m	N_Control	5558.9	9316.94	7437.92	-0.744926	0.0656519	-11.3466	7.70981e-30	5.04814e-28	Normal	N_WCS417_30m-N_Control	RNC	--	--	--
BnaA04G0208100ZS	N_WCS417_30m	N_Control	1408.4	569.121	988.759	1.30714	0.115248	11.3419	8.13204e-30	5.31718e-28	Up	N_WCS417_30m-N_Control	RNC	AT2G32020	--	Acyl-CoA N-acyltransferases (NAT) superfamily protein
BnaC07G0495100ZS	N_WCS417_30m	N_Control	2218.87	1048.31	1633.59	1.08118	0.0953603	11.3378	8.52219e-30	5.5645e-28	Up	N_WCS417_30m-N_Control	RNC	AT4G30210	ATR2	Encodes NADPH-cytochrome P450 reductase that catalyzes the first oxidative step of the phenylpropanoid general pathway.
BnaC05G0398500ZS	N_WCS417_30m	N_Control	270.342	927.249	598.795	-1.77759	0.156792	-11.3372	8.58043e-30	5.59473e-28	Down	N_WCS417_30m-N_Control	RNC	AT3G19580	ZF2	Encodes zinc finger protein. mRNA levels are upregulated in response to ABA, high salt, and mild dessication. The protein is localized to the nucleus and acts as a transcriptional repressor.
BnaA05G0290500ZS	N_WCS417_30m	N_Control	1820.06	3510.81	2665.44	-0.948191	0.083715	-11.3264	9.70932e-30	6.32109e-28	Normal	N_WCS417_30m-N_Control	RNC	--	--	--
BnaC02G0127300ZS	N_WCS417_30m	N_Control	469.608	1280.06	874.832	-1.44727	0.12778	-11.3263	9.72143e-30	6.32109e-28	Down	N_WCS417_30m-N_Control	RNC	AT5G59550	RDUF2	Encodes an ABA- and drought-induced RING-DUF1117 gene whose mutation results in hyposensitive phenotypes toward ABA in terms of germination rate and stomatal closure and markedly reduced tolerance to drought stress relative to wild-type plants.
Bnascaffold0027G0008000ZS	N_WCS417_30m	N_Control	2052.28	3763.74	2908.01	-0.874724	0.0773117	-11.3142	1.11554e-29	7.24343e-28	Normal	N_WCS417_30m-N_Control	RNC	--	--	--
Bnascaffold0027G0051100ZS	N_WCS417_30m	N_Control	3002.27	5357.17	4179.72	-0.83521	0.0738854	-11.3041	1.252e-29	8.11822e-28	Normal	N_WCS417_30m-N_Control	RNC	--	--	--
BnaC08G0088600ZS	N_WCS417_30m	N_Control	2309.02	4120.24	3214.63	-0.835357	0.073923	-11.3004	1.30656e-29	8.46031e-28	Normal	N_WCS417_30m-N_Control	RNC	--	--	--
BnaA05G0238500ZS	N_WCS417_30m	N_Control	1481.93	2939.19	2210.56	-0.988361	0.0874905	-11.2968	1.36127e-29	8.80239e-28	Normal	N_WCS417_30m-N_Control	RNC	--	--	--
BnaA09G0324900ZS	N_WCS417_30m	N_Control	1604.1	2990.54	2297.32	-0.898576	0.0795585	-11.2945	1.3963e-29	9.01646e-28	Normal	N_WCS417_30m-N_Control	RNC	--	--	--
Bnascaffold0517G0000100ZS	N_WCS417_30m	N_Control	1522.24	2875.67	2198.96	-0.917867	0.0813558	-11.2821	1.60801e-29	1.03692e-27	Normal	N_WCS417_30m-N_Control	RNC	--	--	--
BnaC07G0062700ZS	N_WCS417_30m	N_Control	467.774	75.7063	271.74	2.62377	0.232673	11.2766	1.71186e-29	1.10237e-27	Up	N_WCS417_30m-N_Control	RNC	AT3G44840	--	S-adenosyl-L-methionine-dependent methyltransferases superfamily protein
Bnascaffold0027G0045200ZS	N_WCS417_30m	N_Control	1872.59	3391.28	2631.94	-0.85681	0.0759948	-11.2746	1.75207e-29	1.12671e-27	Normal	N_WCS417_30m-N_Control	RNC	--	--	--
BnaA01G0170000ZS	N_WCS417_30m	N_Control	68.7779	436.251	252.514	-2.66307	0.236415	-11.2644	1.96699e-29	1.26319e-27	Down	N_WCS417_30m-N_Control	RNC	AT4G27657	--	--
BnaA01G0247400ZS	N_WCS417_30m	N_Control	4808.09	8134.39	6471.24	-0.758415	0.0673366	-11.263	1.99735e-29	1.28093e-27	Normal	N_WCS417_30m-N_Control	RNC	--	--	--
Bnascaffold0027G0031200ZS	N_WCS417_30m	N_Control	3422.65	6221.13	4821.89	-0.86179	0.0765366	-11.2599	2.07106e-29	1.32638e-27	Normal	N_WCS417_30m-N_Control	RNC	--	--	--
BnaA05G0269600ZS	N_WCS417_30m	N_Control	1377.48	2645.19	2011.34	-0.941325	0.0836195	-11.2572	2.13334e-29	1.3644e-27	Normal	N_WCS417_30m-N_Control	RNC	--	--	--
BnaA09G0330500ZS	N_WCS417_30m	N_Control	1755.49	3338.08	2546.78	-0.927554	0.0824671	-11.2476	2.38046e-29	1.52038e-27	Normal	N_WCS417_30m-N_Control	RNC	--	--	--
BnaA05G0279100ZS	N_WCS417_30m	N_Control	1362.79	2719.59	2041.19	-0.997144	0.0886681	-11.2458	2.42885e-29	1.54917e-27	Normal	N_WCS417_30m-N_Control	RNC	--	--	--
BnaA09G0041200ZS	N_WCS417_30m	N_Control	127.066	559.729	343.397	-2.13866	0.19028	-11.2395	2.60777e-29	1.66102e-27	Down	N_WCS417_30m-N_Control	RNC	AT3G28340	GolS8	Encodes a protein with putative galacturonosyltransferase activity.
BnaC05G0124500ZS	N_WCS417_30m	N_Control	1126.75	347.945	737.348	1.69314	0.150724	11.2334	2.79644e-29	1.77878e-27	Up	N_WCS417_30m-N_Control	RNC	AT1G15040	GAT1_2.1	Encodes a nitrogen regulated putative glutamine amidotransferase that represses shoot branching.
BnaA08G0204400ZS	N_WCS417_30m	N_Control	1065.52	374.814	720.167	1.508	0.134305	11.2281	2.96707e-29	1.88476e-27	Up	N_WCS417_30m-N_Control	RNC	AT1G30360	OSCA3.1	Early-responsive to dehydration stress protein (ERD4)
BnaA03G0101100ZS	N_WCS417_30m	N_Control	645.421	158.921	402.171	2.0214	0.180147	11.2208	3.22351e-29	2.04488e-27	Up	N_WCS417_30m-N_Control	RNC	AT5G59780	MYB59	Encodes a putative transcription factor (MYB59).
BnaA01G0237500ZS	N_WCS417_30m	N_Control	2513.94	4299.63	3406.78	-0.774252	0.0690248	-11.217	3.36492e-29	2.13169e-27	Normal	N_WCS417_30m-N_Control	RNC	--	--	--
BnaA09G0361300ZS	N_WCS417_30m	N_Control	1385.08	2655.24	2020.16	-0.938845	0.0837495	-11.2102	3.63547e-29	2.29998e-27	Normal	N_WCS417_30m-N_Control	RNC	--	--	--
BnaA06G0373900ZS	N_WCS417_30m	N_Control	558.098	1378.29	968.196	-1.30392	0.116361	-11.2057	3.82155e-29	2.41443e-27	Down	N_WCS417_30m-N_Control	RNC	AT3G29010	--	Biotin/lipoate A/B protein ligase family
Bnascaffold0514G0000400ZS	N_WCS417_30m	N_Control	2533.4	4346.96	3440.18	-0.778807	0.0695347	-11.2003	4.06538e-29	2.56503e-27	Normal	N_WCS417_30m-N_Control	RNC	--	--	--
BnaA10G0175100ZS	N_WCS417_30m	N_Control	812.737	244.788	528.762	1.73128	0.154747	11.1878	4.6806e-29	2.94922e-27	Up	N_WCS417_30m-N_Control	RNC	AT5G20250	RS6	encodes a member of glycosyl hydrolase family 36. Expression is induced within 3 hours of dark treatment, in senescing leaves and treatment with exogenous photosynthesis inhibitor. Induction of gene expression was suppressed in excised leaves supplied with sugar. The authors suggest that the gene's expression pattern is responding to the level of sugar in the cell.
Bnascaffold1519G0000300ZS	N_WCS417_30m	N_Control	4090.04	6630.85	5360.45	-0.697164	0.0623911	-11.1741	5.46058e-29	3.43606e-27	Normal	N_WCS417_30m-N_Control	RNC	--	--	--
BnaA09G0291100ZS	N_WCS417_30m	N_Control	1346.61	2644.18	1995.39	-0.97319	0.0871642	-11.165	6.04765e-29	3.80036e-27	Normal	N_WCS417_30m-N_Control	RNC	--	--	--
BnaA05G0206700ZS	N_WCS417_30m	N_Control	907.94	1974.11	1441.02	-1.12022	0.100386	-11.1591	6.46167e-29	4.05509e-27	Down	N_WCS417_30m-N_Control	RNC	--	--	--
BnaA05G0294100ZS	N_WCS417_30m	N_Control	3955.97	6988.6	5472.28	-0.82122	0.0736456	-11.151	7.08294e-29	4.43902e-27	Normal	N_WCS417_30m-N_Control	RNC	--	--	--
Bnascaffold0573G0000600ZS	N_WCS417_30m	N_Control	1075.98	2201.69	1638.83	-1.03326	0.0926729	-11.1495	7.20213e-29	4.50769e-27	Down	N_WCS417_30m-N_Control	RNC	--	--	--
BnaC04G0552000ZS	N_WCS417_30m	N_Control	666.293	172.785	419.539	1.94758	0.174713	11.1473	7.38087e-29	4.61339e-27	Up	N_WCS417_30m-N_Control	RNC	AT2G36880	MAT3	methionine adenosyltransferase 3
BnaA05G0298000ZS	N_WCS417_30m	N_Control	1837.89	3432.74	2635.32	-0.901693	0.0809365	-11.1407	7.946e-29	4.95339e-27	Normal	N_WCS417_30m-N_Control	RNC	--	--	--
BnaA05G0237900ZS	N_WCS417_30m	N_Control	1417.84	2902.57	2160.2	-1.03417	0.0928615	-11.1367	8.31198e-29	5.17465e-27	Down	N_WCS417_30m-N_Control	RNC	--	--	--
BnaA01G0022300ZS	N_WCS417_30m	N_Control	713.112	1636.47	1174.79	-1.19886	0.107772	-11.1241	9.5792e-29	5.95564e-27	Down	N_WCS417_30m-N_Control	RNC	AT4G36520	AUXILIN-LIKE4	Chaperone DnaJ-domain superfamily protein
BnaC02G0248300ZS	N_WCS417_30m	N_Control	1137.23	425.785	781.506	1.4171	0.127397	11.1235	9.64141e-29	5.98637e-27	Up	N_WCS417_30m-N_Control	RNC	AT1G70410	CA4	Encodes a putative beta-carbonic anhydrase betaCA4. Together with betaCA1 (At3g01500) regulates CO2-controlled stomatal movements in guard cells.
BnaA09G0319900ZS	N_WCS417_30m	N_Control	1707.28	3135.87	2421.58	-0.877173	0.0788742	-11.1212	9.89744e-29	6.1372e-27	Normal	N_WCS417_30m-N_Control	RNC	--	--	--
BnaA01G0246300ZS	N_WCS417_30m	N_Control	4467.13	7830.9	6149.01	-0.809656	0.0728407	-11.1154	1.05533e-28	6.53523e-27	Normal	N_WCS417_30m-N_Control	RNC	--	--	--
Bnascaffold2430G0000100ZS	N_WCS417_30m	N_Control	2818.39	4856.45	3837.42	-0.784943	0.0706351	-11.1126	1.08892e-28	6.7343e-27	Normal	N_WCS417_30m-N_Control	RNC	--	--	--
BnaC07G0002100ZS	N_WCS417_30m	N_Control	3422.76	6459.68	4941.22	-0.91648	0.0824979	-11.1091	1.13253e-28	6.99482e-27	Normal	N_WCS417_30m-N_Control	RNC	--	--	--
BnaC06G0152000ZS	N_WCS417_30m	N_Control	554.69	114.214	334.452	2.2773	0.20513	11.1017	1.23054e-28	7.59011e-27	Up	N_WCS417_30m-N_Control	RNC	AT5G36220	CYP91A1	member of CYP81D family of cytochrome p450s. This gene was originally called CYP91A1, but was later renamed to CYP81D1.
BnaA10G0175300ZS	N_WCS417_30m	N_Control	788.77	235.139	511.955	1.746	0.157285	11.1009	1.24229e-28	7.65253e-27	Up	N_WCS417_30m-N_Control	RNC	AT5G20250	RS6	encodes a member of glycosyl hydrolase family 36. Expression is induced within 3 hours of dark treatment, in senescing leaves and treatment with exogenous photosynthesis inhibitor. Induction of gene expression was suppressed in excised leaves supplied with sugar. The authors suggest that the gene's expression pattern is responding to the level of sugar in the cell.
BnaC01G0441600ZS	N_WCS417_30m	N_Control	556.249	102.98	329.614	2.43764	0.21969	11.0958	1.3147e-28	8.08791e-27	Up	N_WCS417_30m-N_Control	RNC	AT1G54070	--	Dormancy/auxin associated family protein
Bnascaffold0027G0058600ZS	N_WCS417_30m	N_Control	1571.82	3048.57	2310.19	-0.955813	0.086284	-11.0775	1.61276e-28	9.90852e-27	Normal	N_WCS417_30m-N_Control	RNC	--	--	--
BnaA01G0244200ZS	N_WCS417_30m	N_Control	2546.39	4395.85	3471.12	-0.787723	0.0711718	-11.0679	1.79541e-28	1.10163e-26	Normal	N_WCS417_30m-N_Control	RNC	--	--	--
BnaA05G0273000ZS	N_WCS417_30m	N_Control	1072.53	2182.57	1627.55	-1.02524	0.0926363	-11.0674	1.80532e-28	1.10625e-26	Down	N_WCS417_30m-N_Control	RNC	--	--	--
Bnascaffold0027G0044300ZS	N_WCS417_30m	N_Control	2140.94	3820.28	2980.61	-0.835267	0.0754734	-11.067	1.81282e-28	1.1094e-26	Normal	N_WCS417_30m-N_Control	RNC	--	--	--
BnaA03G0200900ZS	N_WCS417_30m	N_Control	1661	712.229	1186.61	1.22119	0.110447	11.0568	2.03169e-28	1.24172e-26	Up	N_WCS417_30m-N_Control	RNC	AT2G27030	CAM5	encodes a calmodulin that has higher affinity to kinesin-like calmodulin binding motor protein than CAM4 or CAM6.
BnaA05G0266300ZS	N_WCS417_30m	N_Control	987.542	2037.71	1512.63	-1.04497	0.0945308	-11.0543	2.09023e-28	1.27583e-26	Down	N_WCS417_30m-N_Control	RNC	--	--	--
Bnascaffold0516G0000100ZS	N_WCS417_30m	N_Control	1116.21	2411.44	1763.82	-1.11144	0.100594	-11.0488	2.22135e-28	1.3541e-26	Down	N_WCS417_30m-N_Control	RNC	--	--	--
BnaA09G0361800ZS	N_WCS417_30m	N_Control	1537.54	2891.11	2214.33	-0.911085	0.0824688	-11.0476	2.25092e-28	1.37034e-26	Normal	N_WCS417_30m-N_Control	RNC	--	--	--
BnaA08G0252700ZS	N_WCS417_30m	N_Control	10.8602	242.854	126.857	-4.4903	0.406715	-11.0404	2.43905e-28	1.48294e-26	Down	N_WCS417_30m-N_Control	RNC	AT1G19210	ERF17	encodes a member of the DREB subfamily A-5 of ERF/AP2 transcription factor family. The protein contains one AP2 domain. There are 15 members in this subfamily including RAP2.1, RAP2.9 and RAP2.10.
BnaA09G0300600ZS	N_WCS417_30m	N_Control	2517.48	4731.34	3624.41	-0.910344	0.0825234	-11.0314	2.69779e-28	1.63813e-26	Normal	N_WCS417_30m-N_Control	RNC	--	--	--
BnaC08G0091400ZS	N_WCS417_30m	N_Control	2109.68	3716.65	2913.16	-0.81712	0.074133	-11.0223	2.982e-28	1.80836e-26	Normal	N_WCS417_30m-N_Control	RNC	--	--	--
Bnascaffold0573G0000700ZS	N_WCS417_30m	N_Control	604.655	1484.37	1044.51	-1.29542	0.117892	-10.9882	4.35723e-28	2.63891e-26	Down	N_WCS417_30m-N_Control	RNC	--	--	--
BnaC03G0710400ZS	N_WCS417_30m	N_Control	9622.65	6223.67	7923.16	0.628697	0.0572533	10.981	4.71838e-28	2.85395e-26	Normal	N_WCS417_30m-N_Control	RNC	--	--	--
BnaA05G0297300ZS	N_WCS417_30m	N_Control	1716.44	3483.38	2599.91	-1.02062	0.0929728	-10.9777	4.89482e-28	2.95685e-26	Down	N_WCS417_30m-N_Control	RNC	--	--	--
BnaA06G0125300ZS	N_WCS417_30m	N_Control	98.1756	481.534	289.855	-2.29343	0.208993	-10.9737	5.11264e-28	3.08445e-26	Down	N_WCS417_30m-N_Control	RNC	AT1G18300	NUDT4	nudix hydrolase homolog 4
BnaA01G0111300ZS	N_WCS417_30m	N_Control	7596.37	4764.32	6180.34	0.673018	0.0613429	10.9714	5.24469e-28	3.16004e-26	Normal	N_WCS417_30m-N_Control	RNC	AT4G20860	CELLOX	FAD-binding Berberine family protein
BnaA08G0303100ZS	N_WCS417_30m	N_Control	2146.73	924.931	1535.83	1.21592	0.110979	10.9563	6.19947e-28	3.73052e-26	Up	N_WCS417_30m-N_Control	RNC	AT2G14510	--	Leucine-rich repeat protein kinase family protein
BnaC02G0020100ZS	N_WCS417_30m	N_Control	1772.85	809.664	1291.26	1.13114	0.103262	10.9541	6.35219e-28	3.81751e-26	Up	N_WCS417_30m-N_Control	RNC	AT5G05340	PRX52	Peroxidase superfamily protein
Bnascaffold1759G0000700ZS	N_WCS417_30m	N_Control	991.608	2112.43	1552.02	-1.0906	0.0996018	-10.9496	6.67525e-28	4.00652e-26	Down	N_WCS417_30m-N_Control	RNC	--	--	--
BnaC09G0619000ZS	N_WCS417_30m	N_Control	738.094	210.276	474.185	1.81041	0.165344	10.9494	6.68968e-28	4.01004e-26	Up	N_WCS417_30m-N_Control	RNC	AT5G02230	--	Haloacid dehalogenase-like hydrolase (HAD) superfamily protein
BnaA09G0302000ZS	N_WCS417_30m	N_Control	1464.06	2737.11	2100.59	-0.902776	0.0824939	-10.9436	7.13463e-28	4.27129e-26	Normal	N_WCS417_30m-N_Control	RNC	--	--	--
BnaA06G0336300ZS	N_WCS417_30m	N_Control	909.934	1930.11	1420.02	-1.08454	0.0991873	-10.9343	7.90256e-28	4.72498e-26	Down	N_WCS417_30m-N_Control	RNC	AT5G25350	EBF2	Arabidopsis thaliana EIN3-binding F-box protein 2 (EBF2) mRNA. Part of the SCF complex, it is located in the nucleus and is involved in the ethylene-response pathway.
BnaA09G0306800ZS	N_WCS417_30m	N_Control	1632.14	2984.87	2308.51	-0.871012	0.079699	-10.9288	8.39879e-28	5.01528e-26	Normal	N_WCS417_30m-N_Control	RNC	--	--	--
BnaA05G0230000ZS	N_WCS417_30m	N_Control	1533.45	3292.63	2413.04	-1.102	0.100879	-10.9239	8.85597e-28	5.28154e-26	Down	N_WCS417_30m-N_Control	RNC	--	--	--
BnaA03G0499500ZS	N_WCS417_30m	N_Control	112.291	516.792	314.541	-2.20139	0.201632	-10.9179	9.47015e-28	5.64064e-26	Down	N_WCS417_30m-N_Control	RNC	AT4G27657	--	--
BnaA05G0206200ZS	N_WCS417_30m	N_Control	1311.31	2649.37	1980.34	-1.01438	0.0929896	-10.9085	1.04918e-27	6.24122e-26	Down	N_WCS417_30m-N_Control	RNC	--	--	--
BnaA05G0025700ZS	N_WCS417_30m	N_Control	561.027	1355.3	958.164	-1.2729	0.116727	-10.9049	1.09221e-27	6.48894e-26	Down	N_WCS417_30m-N_Control	RNC	AT2G41640	GT61	Glycosyltransferase family 61 protein
BnaA07G0317200ZS	N_WCS417_30m	N_Control	291.758	909.977	600.867	-1.6415	0.150705	-10.8921	1.25687e-27	7.45772e-26	Down	N_WCS417_30m-N_Control	RNC	AT1G70300	KUP6	potassium transporter
BnaA05G0285000ZS	N_WCS417_30m	N_Control	1233.11	2494.03	1863.57	-1.01647	0.0933516	-10.8886	1.30656e-27	7.7428e-26	Down	N_WCS417_30m-N_Control	RNC	--	--	--
Bnascaffold1160G0000200ZS	N_WCS417_30m	N_Control	2178.08	3857.65	3017.86	-0.824699	0.0757554	-10.8863	1.33914e-27	7.92583e-26	Normal	N_WCS417_30m-N_Control	RNC	--	--	--
BnaA02G0187600ZS	N_WCS417_30m	N_Control	1514.2	647.544	1080.87	1.22626	0.11268	10.8826	1.39463e-27	8.24382e-26	Up	N_WCS417_30m-N_Control	RNC	AT1G70410	CA4	Encodes a putative beta-carbonic anhydrase betaCA4. Together with betaCA1 (At3g01500) regulates CO2-controlled stomatal movements in guard cells.
BnaC07G0312700ZS	N_WCS417_30m	N_Control	158.971	665.29	412.131	-2.06341	0.18965	-10.8801	1.43435e-27	8.46791e-26	Down	N_WCS417_30m-N_Control	RNC	AT3G28340	GolS8	Encodes a protein with putative galacturonosyltransferase activity.
BnaA09G0101100ZS	N_WCS417_30m	N_Control	231.694	774.747	503.22	-1.74227	0.160136	-10.8799	1.4371e-27	8.47344e-26	Down	N_WCS417_30m-N_Control	RNC	AT5G66400	RAB18	Belongs to the dehydrin protein family, which contains highly conserved stretches of 7-17 residues that are repetitively scattered in their sequences, the K-, S-, Y- and lysine rich segments. ABA- and drought-induced glycine-rice dehydrin protein. The ABA-induced expression of RAB18 was reduced following ACC application, indicating that ethylene inhibits the ABA signaling pathway. RAB18 is also e…
BnaA09G0323100ZS	N_WCS417_30m	N_Control	1237.53	2449.35	1843.44	-0.985094	0.0905564	-10.8782	1.46371e-27	8.61953e-26	Normal	N_WCS417_30m-N_Control	RNC	--	--	--
BnaA05G0236400ZS	N_WCS417_30m	N_Control	1194.09	2404.3	1799.19	-1.00994	0.0928613	-10.8758	1.50362e-27	8.84338e-26	Down	N_WCS417_30m-N_Control	RNC	--	--	--
BnaA05G0273500ZS	N_WCS417_30m	N_Control	1313.5	2504.43	1908.97	-0.93109	0.0856163	-10.8751	1.51425e-27	8.89477e-26	Normal	N_WCS417_30m-N_Control	RNC	--	--	--
BnaA06G0117600ZS	N_WCS417_30m	N_Control	5542.2	3380.77	4461.48	0.712891	0.065556	10.8745	1.52443e-27	8.94332e-26	Normal	N_WCS417_30m-N_Control	RNC	AT1G17170	GSTU24	Encodes glutathione transferase belonging to the tau class of GSTs. Naming convention according to Wagner et al. (2002).
Bnascaffold0135G0000500ZS	N_WCS417_30m	N_Control	1512.8	2792.14	2152.47	-0.884179	0.0813176	-10.8732	1.5476e-27	9.06789e-26	Normal	N_WCS417_30m-N_Control	RNC	--	--	--
Bnascaffold0516G0000400ZS	N_WCS417_30m	N_Control	1535.64	2849.71	2192.68	-0.89196	0.0820374	-10.8726	1.55689e-27	9.11093e-26	Normal	N_WCS417_30m-N_Control	RNC	--	--	--
BnaC04G0527100ZS	N_WCS417_30m	N_Control	1057.44	2113.25	1585.35	-0.998968	0.0919839	-10.8602	1.78271e-27	1.04194e-25	Normal	N_WCS417_30m-N_Control	RNC	AT2G33580	LYK5	Encodes a LysM-containing receptor-like kinase. Induction of chitin-responsive genes by chitin treatment is not blocked in the mutant.
BnaA05G0239700ZS	N_WCS417_30m	N_Control	929.828	1941.83	1435.83	-1.0626	0.0978453	-10.86	1.78844e-27	1.04399e-25	Down	N_WCS417_30m-N_Control	RNC	--	--	--
Bnascaffold0137G0000200ZS	N_WCS417_30m	N_Control	2602.64	4599.03	3600.84	-0.82108	0.075625	-10.8573	1.84187e-27	1.07383e-25	Normal	N_WCS417_30m-N_Control	RNC	--	--	--
BnaC08G0086500ZS	N_WCS417_30m	N_Control	2285.2	4042.47	3163.84	-0.82276	0.0757903	-10.8557	1.87298e-27	1.09061e-25	Normal	N_WCS417_30m-N_Control	RNC	--	--	--
Bnascaffold0211G0000100ZS	N_WCS417_30m	N_Control	1941.23	3516.03	2728.63	-0.856819	0.0789638	-10.8508	1.97714e-27	1.14961e-25	Normal	N_WCS417_30m-N_Control	RNC	--	--	--
Bnascaffold0026G0014700ZS	N_WCS417_30m	N_Control	2884.15	5161.02	4022.59	-0.839324	0.0773521	-10.8507	1.9792e-27	1.14961e-25	Normal	N_WCS417_30m-N_Control	RNC	--	--	--
BnaC04G0449800ZS	N_WCS417_30m	N_Control	623.693	158.288	390.991	1.97778	0.182369	10.8449	2.10836e-27	1.22311e-25	Up	N_WCS417_30m-N_Control	RNC	AT2G23770	LYK4	protein kinase family protein / peptidoglycan-binding LysM domain-containing protein
BnaA08G0074900ZS	N_WCS417_30m	N_Control	318.959	925.854	622.407	-1.53786	0.141829	-10.8431	2.14992e-27	1.24568e-25	Down	N_WCS417_30m-N_Control	RNC	AT1G32920	--	--
Bnascaffold0039G0000800ZS	N_WCS417_30m	N_Control	2968.4	5356.52	4162.46	-0.851395	0.0785888	-10.8335	2.38741e-27	1.38157e-25	Normal	N_WCS417_30m-N_Control	RNC	--	--	--
BnaA09G0357100ZS	N_WCS417_30m	N_Control	1114.22	2195.25	1654.73	-0.978367	0.0903241	-10.8317	2.4348e-27	1.40725e-25	Normal	N_WCS417_30m-N_Control	RNC	--	--	--
BnaA09G0584700ZS	N_WCS417_30m	N_Control	723.428	202.285	462.856	1.84006	0.169912	10.8295	2.49492e-27	1.44022e-25	Up	N_WCS417_30m-N_Control	RNC	AT2G23960	--	Class I glutamine amidotransferase-like superfamily protein
BnaA09G0370100ZS	N_WCS417_30m	N_Control	1219.32	2378.45	1798.89	-0.9641	0.0890708	-10.824	2.65027e-27	1.52802e-25	Normal	N_WCS417_30m-N_Control	RNC	--	--	--
Bnascaffold0215G0000100ZS	N_WCS417_30m	N_Control	2275.61	4071.11	3173.36	-0.838903	0.0775317	-10.8201	2.76384e-27	1.59153e-25	Normal	N_WCS417_30m-N_Control	RNC	--	--	--
BnaA01G0247200ZS	N_WCS417_30m	N_Control	4478.8	7589.84	6034.32	-0.760775	0.0703884	-10.8082	3.14631e-27	1.80955e-25	Normal	N_WCS417_30m-N_Control	RNC	--	--	--
BnaC08G0436300ZS	N_WCS417_30m	N_Control	3829.77	6131.85	4980.81	-0.67895	0.0628269	-10.8067	3.2006e-27	1.83852e-25	Normal	N_WCS417_30m-N_Control	RNC	AT2G23810	TET8	Member of TETRASPANIN family
BnaA09G0330100ZS	N_WCS417_30m	N_Control	1020.74	2174.3	1597.52	-1.09155	0.101026	-10.8047	3.26879e-27	1.87539e-25	Down	N_WCS417_30m-N_Control	RNC	--	--	--
BnaA09G0360900ZS	N_WCS417_30m	N_Control	2278.65	4120.74	3199.69	-0.854433	0.0790917	-10.8031	3.3286e-27	1.90736e-25	Normal	N_WCS417_30m-N_Control	RNC	--	--	--
Bnascaffold1728G0000100ZS	N_WCS417_30m	N_Control	1807.48	3260.04	2533.76	-0.850664	0.0788141	-10.7933	3.70228e-27	2.1189e-25	Normal	N_WCS417_30m-N_Control	RNC	--	--	--
BnaC01G0296000ZS	N_WCS417_30m	N_Control	941.377	1977.82	1459.6	-1.07153	0.0992913	-10.7918	3.76232e-27	2.15063e-25	Down	N_WCS417_30m-N_Control	RNC	AT3G46600	--	GRAS family transcription factor
Bnascaffold0026G0040500ZS	N_WCS417_30m	N_Control	2614.87	4582.2	3598.53	-0.809094	0.0749748	-10.7915	3.77391e-27	2.15463e-25	Normal	N_WCS417_30m-N_Control	RNC	--	--	--
Bnascaffold0517G0000500ZS	N_WCS417_30m	N_Control	2819.8	5060.55	3940.18	-0.843401	0.078156	-10.7912	3.78611e-27	2.15896e-25	Normal	N_WCS417_30m-N_Control	RNC	--	--	--
Bnascaffold1516G0000700ZS	N_WCS417_30m	N_Control	2063.59	3723.57	2893.58	-0.851219	0.0789063	-10.7877	3.93417e-27	2.24066e-25	Normal	N_WCS417_30m-N_Control	RNC	--	--	--
BnaA09G0185100ZS	N_WCS417_30m	N_Control	319.336	936.072	627.704	-1.55157	0.143852	-10.7859	4.01253e-27	2.28251e-25	Down	N_WCS417_30m-N_Control	RNC	AT5G42380	CML37	calmodulin like 37
BnaC03G0749700ZS	N_WCS417_30m	N_Control	6423.27	4035.21	5229.24	0.67051	0.0621826	10.7829	4.14546e-27	2.35526e-25	Normal	N_WCS417_30m-N_Control	RNC	AT4G34050	CCoAOMT1	S-adenosyl-L-methionine-dependent methyltransferases superfamily protein
BnaC03G0281000ZS	N_WCS417_30m	N_Control	386.671	54.8176	220.745	2.82202	0.261728	10.7822	4.1759e-27	2.36969e-25	Up	N_WCS417_30m-N_Control	RNC	AT2G24850	TAT3	Encodes a tyrosine aminotransferase that is responsive to treatment with jasmonic acid.
BnaA01G0244800ZS	N_WCS417_30m	N_Control	1563.08	2898.98	2231.03	-0.89143	0.0827574	-10.7716	4.68751e-27	2.65678e-25	Normal	N_WCS417_30m-N_Control	RNC	--	--	--
BnaA05G0211900ZS	N_WCS417_30m	N_Control	2898.88	5222.46	4060.67	-0.84883	0.0789292	-10.7543	5.65471e-27	3.2011e-25	Normal	N_WCS417_30m-N_Control	RNC	--	--	--
BnaA01G0101300ZS	N_WCS417_30m	N_Control	1917.77	915.068	1416.42	1.06737	0.0993386	10.7447	6.27514e-27	3.54585e-25	Up	N_WCS417_30m-N_Control	RNC	--	--	--
BnaC03G0749300ZS	N_WCS417_30m	N_Control	12525.6	18475.8	15500.7	-0.56078	0.0521915	-10.7447	6.27886e-27	3.54585e-25	Normal	N_WCS417_30m-N_Control	RNC	AT4G34110	PABP2	Putative poly-A binding protein. Member of a gene family .Expressed in stele and root meristem and post-fertilization ovules.Member of the class II family of PABP proteins.
BnaC03G0084200ZS	N_WCS417_30m	N_Control	303.35	886.515	594.933	-1.54676	0.144038	-10.7386	6.7039e-27	3.78132e-25	Down	N_WCS417_30m-N_Control	RNC	AT3G03280	--	--
Bnascaffold1516G0001600ZS	N_WCS417_30m	N_Control	1581.51	2942.12	2261.81	-0.895216	0.0833655	-10.7384	6.71696e-27	3.78372e-25	Normal	N_WCS417_30m-N_Control	RNC	--	--	--
BnaC07G0401900ZS	N_WCS417_30m	N_Control	3065.81	1568.91	2317.36	0.966621	0.0900159	10.7383	6.72431e-27	3.78372e-25	Normal	N_WCS417_30m-N_Control	RNC	AT4G15610	CASPL1D1	Uncharacterised protein family (UPF0497)
BnaC03G0585100ZS	N_WCS417_30m	N_Control	1496.81	2925.03	2210.92	-0.966626	0.0900706	-10.7319	7.21168e-27	4.05309e-25	Normal	N_WCS417_30m-N_Control	RNC	--	--	--
BnaC04G0102000ZS	N_WCS417_30m	N_Control	1138.77	389.198	763.984	1.55079	0.144667	10.7197	8.22638e-27	4.61782e-25	Up	N_WCS417_30m-N_Control	RNC	AT2G36320	--	A20/AN1-like zinc finger family protein
Bnascaffold0514G0000100ZS	N_WCS417_30m	N_Control	2295.83	3972.58	3134.2	-0.790962	0.0738054	-10.7169	8.4838e-27	4.75662e-25	Normal	N_WCS417_30m-N_Control	RNC	--	--	--
Bnascaffold0174G0000100ZS	N_WCS417_30m	N_Control	1375.5	2621.63	1998.56	-0.930282	0.0868109	-10.7162	8.54538e-27	4.78541e-25	Normal	N_WCS417_30m-N_Control	RNC	--	--	--
BnaC04G0220700ZS	N_WCS417_30m	N_Control	1547.38	2921.32	2234.35	-0.916378	0.0855181	-10.7156	8.60012e-27	4.81032e-25	Normal	N_WCS417_30m-N_Control	RNC	--	--	--
BnaC05G0214400ZS	N_WCS417_30m	N_Control	2351.99	1222.71	1787.35	0.943746	0.0881397	10.7074	9.39692e-27	5.24972e-25	Normal	N_WCS417_30m-N_Control	RNC	AT1G27130	GSTU13	Encodes glutathione transferase belonging to the tau class of GSTs. Naming convention according to Wagner et al. (2002).
BnaA05G0194700ZS	N_WCS417_30m	N_Control	1177.59	2307.86	1742.73	-0.970579	0.0906614	-10.7055	9.58661e-27	5.3493e-25	Normal	N_WCS417_30m-N_Control	RNC	--	--	--
BnaA02G0279100ZS	N_WCS417_30m	N_Control	651.337	176.952	414.144	1.87926	0.175638	10.6996	1.02194e-26	5.69564e-25	Up	N_WCS417_30m-N_Control	RNC	AT5G42650	DDE2	Encodes a member of the cytochrome p450 CYP74 gene family that functions as an allene oxide synthase. This enzyme catalyzes dehydration of the hydroperoxide to an unstable allene oxide in the JA biosynthetic pathway. It shows a dual catalytic activity, the major one being a 13-AOS but also expressing a 9-AOS activity.
BnaA01G0237600ZS	N_WCS417_30m	N_Control	1991.7	3615.37	2803.53	-0.86053	0.0804492	-10.6966	1.05619e-26	5.87951e-25	Normal	N_WCS417_30m-N_Control	RNC	--	--	--
BnaA09G0304200ZS	N_WCS417_30m	N_Control	1164.73	2470.38	1817.55	-1.08537	0.101481	-10.6953	1.07039e-26	5.9515e-25	Down	N_WCS417_30m-N_Control	RNC	--	--	--
BnaC09G0317400ZS	N_WCS417_30m	N_Control	2256.58	4000.78	3128.68	-0.825815	0.0772306	-10.6928	1.09947e-26	6.10588e-25	Normal	N_WCS417_30m-N_Control	RNC	--	--	--
BnaC08G0089600ZS	N_WCS417_30m	N_Control	3557.39	6465.64	5011.52	-0.861762	0.0805954	-10.6924	1.10426e-26	6.12525e-25	Normal	N_WCS417_30m-N_Control	RNC	--	--	--
Bnascaffold0040G0000600ZS	N_WCS417_30m	N_Control	1416.23	2640.04	2028.14	-0.898371	0.0840384	-10.69	1.1336e-26	6.28052e-25	Normal	N_WCS417_30m-N_Control	RNC	--	--	--
BnaC08G0367000ZS	N_WCS417_30m	N_Control	616.503	1463.9	1040.2	-1.24833	0.116878	-10.6806	1.25418e-26	6.94039e-25	Down	N_WCS417_30m-N_Control	RNC	AT3G56880	--	VQ motif-containing protein
BnaA05G0241100ZS	N_WCS417_30m	N_Control	1025.51	2091.23	1558.37	-1.02782	0.0962445	-10.6793	1.27229e-26	7.03228e-25	Down	N_WCS417_30m-N_Control	RNC	--	--	--
BnaA05G0214700ZS	N_WCS417_30m	N_Control	767.607	1665.13	1216.37	-1.1169	0.104614	-10.6763	1.31377e-26	7.253e-25	Down	N_WCS417_30m-N_Control	RNC	--	--	--
BnaC03G0003300ZS	N_WCS417_30m	N_Control	392.746	1058.17	725.458	-1.42986	0.13402	-10.669	1.42095e-26	7.83549e-25	Down	N_WCS417_30m-N_Control	RNC	AT5G01710	--	methyltransferases
Bnascaffold1516G0000400ZS	N_WCS417_30m	N_Control	2130.31	3775.07	2952.69	-0.825131	0.0773528	-10.6671	1.45063e-26	7.98975e-25	Normal	N_WCS417_30m-N_Control	RNC	--	--	--
BnaA09G0341600ZS	N_WCS417_30m	N_Control	899.9	1865.54	1382.72	-1.05147	0.0986579	-10.6577	1.60475e-26	8.82821e-25	Down	N_WCS417_30m-N_Control	RNC	--	--	--
Bnascaffold0047G0000500ZS	N_WCS417_30m	N_Control	2290	3997.55	3143.77	-0.80353	0.075462	-10.6482	1.77859e-26	9.77305e-25	Normal	N_WCS417_30m-N_Control	RNC	--	--	--
Bnascaffold0025G0014400ZS	N_WCS417_30m	N_Control	2121.29	3834.52	2977.9	-0.854038	0.080239	-10.6437	1.86625e-26	1.02427e-24	Normal	N_WCS417_30m-N_Control	RNC	--	--	--
Bnascaffold0039G0000200ZS	N_WCS417_30m	N_Control	1583.31	2941.33	2262.32	-0.893257	0.083947	-10.6407	1.92625e-26	1.05596e-24	Normal	N_WCS417_30m-N_Control	RNC	--	--	--
Bnascaffold0026G0021800ZS	N_WCS417_30m	N_Control	1358.61	2562.44	1960.52	-0.915179	0.0860629	-10.6338	2.07383e-26	1.13554e-24	Normal	N_WCS417_30m-N_Control	RNC	--	--	--
Bnascaffold0025G0014600ZS	N_WCS417_30m	N_Control	2018.74	3574.54	2796.64	-0.824243	0.0775609	-10.627	2.23079e-26	1.22005e-24	Normal	N_WCS417_30m-N_Control	RNC	--	--	--
BnaC03G0813600ZS	N_WCS417_30m	N_Control	466.708	92.3507	279.529	2.33567	0.219936	10.6198	2.41084e-26	1.31699e-24	Up	N_WCS417_30m-N_Control	RNC	AT1G55740	SIP1	seed imbibition 1
Bnascaffold2179G0000200ZS	N_WCS417_30m	N_Control	1490.09	2821.61	2155.85	-0.920743	0.086753	-10.6134	2.58216e-26	1.40893e-24	Normal	N_WCS417_30m-N_Control	RNC	--	--	--
BnaA05G0263400ZS	N_WCS417_30m	N_Control	834.834	1761.61	1298.22	-1.07706	0.101497	-10.6117	2.6297e-26	1.4332e-24	Down	N_WCS417_30m-N_Control	RNC	--	--	--
BnaA03G0516400ZS	N_WCS417_30m	N_Control	1941.21	947.162	1444.19	1.03504	0.0976217	10.6025	2.90019e-26	1.57878e-24	Up	N_WCS417_30m-N_Control	RNC	AT4G30210	ATR2	Encodes NADPH-cytochrome P450 reductase that catalyzes the first oxidative step of the phenylpropanoid general pathway.
Bnascaffold0027G0058200ZS	N_WCS417_30m	N_Control	2045.35	3723.13	2884.24	-0.864255	0.081671	-10.5821	3.60589e-26	1.96067e-24	Normal	N_WCS417_30m-N_Control	RNC	--	--	--
BnaA08G0138300ZS	N_WCS417_30m	N_Control	7081.16	4512.96	5797.06	0.649908	0.0614699	10.5728	3.98531e-26	2.16446e-24	Normal	N_WCS417_30m-N_Control	RNC	AT4G34050	CCoAOMT1	S-adenosyl-L-methionine-dependent methyltransferases superfamily protein
Bnascaffold0025G0011400ZS	N_WCS417_30m	N_Control	2258.88	3993.95	3126.41	-0.822145	0.07778	-10.5701	4.0991e-26	2.22368e-24	Normal	N_WCS417_30m-N_Control	RNC	--	--	--
BnaA09G0137100ZS	N_WCS417_30m	N_Control	3693.45	2130.4	2911.92	0.793612	0.075147	10.5608	4.52838e-26	2.45371e-24	Normal	N_WCS417_30m-N_Control	RNC	AT1G64160	DIR5	Encodes a dirigent protein involved in the synthesis of (-)pinoresinol. Dirigent proteins impart stereoselectivity on the phenoxy radical coupling reaction yielding optically active lignans from two molecules of coniferyl alcohol.
BnaC03G0351200ZS	N_WCS417_30m	N_Control	1213.04	482.217	847.627	1.33181	0.126196	10.5535	4.8941e-26	2.64881e-24	Up	N_WCS417_30m-N_Control	RNC	AT3G03780	MS2	Encodes a cytosolic methionine synthase, involved in methionine regeneration via the activated methyl cycle (or SAM cycle)
BnaA05G0231600ZS	N_WCS417_30m	N_Control	640.027	1442.59	1041.31	-1.17278	0.11116	-10.5503	5.0628e-26	2.73695e-24	Down	N_WCS417_30m-N_Control	RNC	--	--	--
BnaA05G0211200ZS	N_WCS417_30m	N_Control	2066.96	3733.59	2900.28	-0.85274	0.0808326	-10.5494	5.10955e-26	2.75904e-24	Normal	N_WCS417_30m-N_Control	RNC	--	--	--
BnaA09G0322300ZS	N_WCS417_30m	N_Control	1092.62	2245.03	1668.82	-1.0392	0.0985139	-10.5487	5.14879e-26	2.77703e-24	Down	N_WCS417_30m-N_Control	RNC	--	--	--
Bnascaffold0026G0043400ZS	N_WCS417_30m	N_Control	1863.39	3285.95	2574.67	-0.818336	0.0775837	-10.5478	5.20052e-26	2.8017e-24	Normal	N_WCS417_30m-N_Control	RNC	--	--	--
BnaC06G0453200ZS	N_WCS417_30m	N_Control	981.394	1977.8	1479.59	-1.01092	0.0958654	-10.5452	5.3441e-26	2.87574e-24	Down	N_WCS417_30m-N_Control	RNC	AT1G80840	WRKY40	Pathogen-induced transcription factor. Binds W-box sequences in vitro. Forms protein complexes with itself and with WRKY40 and WRKY60. Coexpression with WRKY18 or WRKY60 made plants more susceptible to both P. syringae and B. cinerea. WRKY18, WRKY40, and WRKY60 have partially redundant roles in response to the hemibiotrophic bacterial pathogen Pseudomonas syringae and the necrotrophic fungal path…
BnaA05G0256000ZS	N_WCS417_30m	N_Control	1598.09	3005.59	2301.84	-0.911726	0.0864605	-10.545	5.35688e-26	2.87931e-24	Normal	N_WCS417_30m-N_Control	RNC	--	--	--
Bnascaffold0027G0059000ZS	N_WCS417_30m	N_Control	1330.52	2515.91	1923.21	-0.918949	0.0871749	-10.5414	5.56377e-26	2.98708e-24	Normal	N_WCS417_30m-N_Control	RNC	--	--	--
Bnascaffold0284G0000200ZS	N_WCS417_30m	N_Control	1250.09	2376.15	1813.12	-0.926426	0.0879083	-10.5386	5.73753e-26	3.07684e-24	Normal	N_WCS417_30m-N_Control	RNC	--	--	--
BnaC04G0392100ZS	N_WCS417_30m	N_Control	1066.08	2160.99	1613.53	-1.01982	0.0968007	-10.5353	5.94237e-26	3.18305e-24	Down	N_WCS417_30m-N_Control	RNC	AT5G39670	CML46	Calcium-binding EF-hand family protein
BnaC07G0548900ZS	N_WCS417_30m	N_Control	1505.64	657.163	1081.4	1.1953	0.113483	10.5328	6.09648e-26	3.26186e-24	Up	N_WCS417_30m-N_Control	RNC	AT4G38540	--	FAD/NAD(P)-binding oxidoreductase family protein
Bnascaffold1925G0000200ZS	N_WCS417_30m	N_Control	1629.99	2986.55	2308.27	-0.873275	0.0829247	-10.5309	6.22094e-26	3.32465e-24	Normal	N_WCS417_30m-N_Control	RNC	--	--	--
BnaA05G0248800ZS	N_WCS417_30m	N_Control	2025.87	3613.22	2819.54	-0.834376	0.079258	-10.5273	6.46372e-26	3.45046e-24	Normal	N_WCS417_30m-N_Control	RNC	--	--	--
Bnascaffold2170G0000500ZS	N_WCS417_30m	N_Control	1428.35	2653.68	2041.02	-0.893365	0.0848762	-10.5255	6.59109e-26	3.51445e-24	Normal	N_WCS417_30m-N_Control	RNC	--	--	--
Bnascaffold2702G0000100ZS	N_WCS417_30m	N_Control	1391.47	2616.62	2004.04	-0.910867	0.0865447	-10.5248	6.63955e-26	3.53626e-24	Normal	N_WCS417_30m-N_Control	RNC	--	--	--
Bnascaffold0066G0000500ZS	N_WCS417_30m	N_Control	2152.37	3943.65	3048.01	-0.873311	0.0830074	-10.5209	6.92172e-26	3.68236e-24	Normal	N_WCS417_30m-N_Control	RNC	--	--	--
BnaA10G0249100ZS	N_WCS417_30m	N_Control	1592.36	731.831	1162.09	1.12134	0.106633	10.5159	7.29852e-26	3.8784e-24	Up	N_WCS417_30m-N_Control	RNC	AT5G64260	EXL2	EXORDIUM like 2
BnaA05G0194900ZS	N_WCS417_30m	N_Control	984.627	2031.74	1508.18	-1.04455	0.0993661	-10.5121	7.59473e-26	4.03123e-24	Down	N_WCS417_30m-N_Control	RNC	--	--	--
BnaC03G0585200ZS	N_WCS417_30m	N_Control	2851.68	4971.64	3911.66	-0.801539	0.0762949	-10.5058	8.12418e-26	4.30738e-24	Normal	N_WCS417_30m-N_Control	RNC	--	--	--
Bnascaffold1137G0000100ZS	N_WCS417_30m	N_Control	1411.88	2595.14	2003.51	-0.878165	0.0836111	-10.503	8.371e-26	4.43322e-24	Normal	N_WCS417_30m-N_Control	RNC	--	--	--
BnaC09G0317300ZS	N_WCS417_30m	N_Control	938.593	1909.79	1424.19	-1.02516	0.0976631	-10.4969	8.92572e-26	4.72165e-24	Down	N_WCS417_30m-N_Control	RNC	--	--	--
BnaA05G0254400ZS	N_WCS417_30m	N_Control	1183.67	2409.75	1796.71	-1.02593	0.0977728	-10.493	9.30111e-26	4.91468e-24	Down	N_WCS417_30m-N_Control	RNC	--	--	--
BnaA09G0635500ZS	N_WCS417_30m	N_Control	926.273	296.057	611.165	1.64527	0.156825	10.4911	9.49279e-26	5.01031e-24	Up	N_WCS417_30m-N_Control	RNC	AT1G14200	USR1	RING/U-box superfamily protein
Bnascaffold2857G0000200ZS	N_WCS417_30m	N_Control	1320.52	2458.95	1889.74	-0.896994	0.0855365	-10.4867	9.94624e-26	5.24373e-24	Normal	N_WCS417_30m-N_Control	RNC	--	--	--
Bnascaffold0025G0013400ZS	N_WCS417_30m	N_Control	5404.65	8359.59	6882.12	-0.629272	0.0601101	-10.4686	1.2035e-25	6.3378e-24	Normal	N_WCS417_30m-N_Control	RNC	--	--	--
BnaC08G0342100ZS	N_WCS417_30m	N_Control	1524.84	696.531	1110.69	1.13053	0.108027	10.4652	1.24781e-25	6.56376e-24	Up	N_WCS417_30m-N_Control	RNC	AT3G54150	EFD	S-adenosyl-L-methionine-dependent methyltransferases superfamily protein
BnaA05G0284400ZS	N_WCS417_30m	N_Control	1503.54	3042.21	2272.87	-1.01736	0.0972809	-10.4579	1.34747e-25	7.08005e-24	Down	N_WCS417_30m-N_Control	RNC	--	--	--
BnaA05G0226700ZS	N_WCS417_30m	N_Control	814.425	1718.98	1266.7	-1.07753	0.103225	-10.4387	1.64982e-25	8.65898e-24	Down	N_WCS417_30m-N_Control	RNC	--	--	--
BnaA05G0274900ZS	N_WCS417_30m	N_Control	1245.24	2449.02	1847.13	-0.976129	0.0935986	-10.4289	1.83039e-25	9.59591e-24	Normal	N_WCS417_30m-N_Control	RNC	--	--	--
BnaA01G0243200ZS	N_WCS417_30m	N_Control	1391.3	2729.59	2060.45	-0.971691	0.093191	-10.4269	1.86923e-25	9.78857e-24	Normal	N_WCS417_30m-N_Control	RNC	--	--	--
Bnascaffold0060G0000800ZS	N_WCS417_30m	N_Control	1916.37	3425.21	2670.79	-0.837576	0.0804461	-10.4116	2.19411e-25	1.14771e-23	Normal	N_WCS417_30m-N_Control	RNC	--	--	--
BnaC05G0229800ZS	N_WCS417_30m	N_Control	729.988	224.311	477.15	1.70242	0.163587	10.4068	2.30869e-25	1.20629e-23	Up	N_WCS417_30m-N_Control	RNC	AT1G25220	WEI7	Catalyzes the first step of tryptophan biosynthesis: Chorismate L-Glutamine = Anthranilate Pyruvate L-Glutamate. Functions as a heterocomplex with anthranilate synthase alpha subunit (ASA1 or ASA2).
BnaA09G0115600ZS	N_WCS417_30m	N_Control	1300.61	549.078	924.846	1.2448	0.119643	10.4043	2.37103e-25	1.23748e-23	Up	N_WCS417_30m-N_Control	RNC	AT2G18160	GBF5	Encodes a b-ZIP transcription factor.
BnaA01G0052400ZS	N_WCS417_30m	N_Control	526.149	1237.13	881.638	-1.23359	0.118623	-10.3992	2.49976e-25	1.30321e-23	Down	N_WCS417_30m-N_Control	RNC	AT4G32610	--	copper ion binding
Bnascaffold0027G0034900ZS	N_WCS417_30m	N_Control	1016.71	2030.06	1523.39	-0.997811	0.0959888	-10.3951	2.61082e-25	1.3596e-23	Normal	N_WCS417_30m-N_Control	RNC	--	--	--
BnaA03G0202800ZS	N_WCS417_30m	N_Control	4451.68	2697.81	3574.75	0.722664	0.0695232	10.3946	2.62476e-25	1.36534e-23	Normal	N_WCS417_30m-N_Control	RNC	AT2G41430	LSR1	Encodes hydrophilic protein lacking Cys residues that is expressed in response to drought stress, light stress and treatment with plant-growth-promoting rhizobacteria (Paenibacillus polymyxa), possibly revealing a connection between responses to biotic and abiotic stress. Also identified as a CTC Interacting Domain (CID) protein in a yeast two hybrid screen using the PAB2 protein as bait. Contain…
BnaA05G0243200ZS	N_WCS417_30m	N_Control	641.399	1548.25	1094.82	-1.27186	0.122444	-10.3873	2.83348e-25	1.47228e-23	Down	N_WCS417_30m-N_Control	RNC	--	--	--
Bnascaffold0037G0000400ZS	N_WCS417_30m	N_Control	1563.82	2884.08	2223.95	-0.882715	0.0850786	-10.3753	3.21248e-25	1.66736e-23	Normal	N_WCS417_30m-N_Control	RNC	--	--	--
BnaC09G0042100ZS	N_WCS417_30m	N_Control	825.084	1769.59	1297.34	-1.1014	0.106199	-10.371	3.35952e-25	1.74174e-23	Down	N_WCS417_30m-N_Control	RNC	AT5G27120	--	SAR DNA-binding protein, putative, strong similarity to SAR DNA-binding protein-1 (Pisum sativum) GI:3132696; contains Pfam profile PF01798: Putative snoRNA binding domain; has similarity to MAR binding NOP58 protein
BnaA01G0253800ZS	N_WCS417_30m	N_Control	2784.39	5025.17	3904.78	-0.851719	0.0821678	-10.3656	3.55467e-25	1.84088e-23	Normal	N_WCS417_30m-N_Control	RNC	--	--	--
BnaC03G0584800ZS	N_WCS417_30m	N_Control	4696.74	7956.09	6326.41	-0.760256	0.0733483	-10.365	3.57739e-25	1.8506e-23	Normal	N_WCS417_30m-N_Control	RNC	--	--	--
BnaC03G0024500ZS	N_WCS417_30m	N_Control	1234.11	502.736	868.424	1.2965	0.125158	10.3589	3.81363e-25	1.97063e-23	Up	N_WCS417_30m-N_Control	RNC	AT5G05440	RCAR8	Encodes a member of the PYR (pyrabactin resistance )/PYL(PYR1-like)/RCAR (regulatory components of ABA receptor) family proteins with 14 members. PYR/PYL/RCAR family proteins function as abscisic acid sensors. Mediate ABA-dependent regulation of protein phosphatase 2Cs ABI1 and ABI2.
BnaA07G0337400ZS	N_WCS417_30m	N_Control	643.086	1423.19	1033.14	-1.14587	0.110663	-10.3546	3.99033e-25	2.05966e-23	Down	N_WCS417_30m-N_Control	RNC	AT1G73220	45566	organic cation/carnitine transporter1
BnaC03G0749000ZS	N_WCS417_30m	N_Control	3611.94	2109.53	2860.74	0.775941	0.0749667	10.3505	4.16411e-25	2.147e-23	Normal	N_WCS417_30m-N_Control	RNC	AT4G05050	UBQ11	polyubiquitin gene, belongs to a subtype group with UBQ10 and UBQ14. Various ecotypes of Arabidopsis have different numbers of ubiquitin repeats within this gene.
Bnascaffold0027G0044000ZS	N_WCS417_30m	N_Control	2068.1	3598.19	2833.14	-0.798697	0.0771759	-10.349	4.22662e-25	2.17683e-23	Normal	N_WCS417_30m-N_Control	RNC	--	--	--
BnaC08G0458800ZS	N_WCS417_30m	N_Control	806.125	268.89	537.508	1.58448	0.153109	10.3487	4.24403e-25	2.18339e-23	Up	N_WCS417_30m-N_Control	RNC	AT2G20560	DNAJ	DNAJ heat shock family protein
BnaA05G0220000ZS	N_WCS417_30m	N_Control	1603.13	3118.35	2360.74	-0.960037	0.0929571	-10.3277	5.27916e-25	2.71295e-23	Normal	N_WCS417_30m-N_Control	RNC	--	--	--
BnaA04G0109300ZS	N_WCS417_30m	N_Control	416.026	1066.6	741.314	-1.35888	0.13163	-10.3234	5.52041e-25	2.83381e-23	Down	N_WCS417_30m-N_Control	RNC	AT5G39670	CML46	Calcium-binding EF-hand family protein
Bnascaffold0025G0006700ZS	N_WCS417_30m	N_Control	2116.06	3682.12	2899.09	-0.798996	0.0773975	-10.3233	5.53031e-25	2.83578e-23	Normal	N_WCS417_30m-N_Control	RNC	--	--	--
BnaA09G0588200ZS	N_WCS417_30m	N_Control	1203.84	447.89	825.867	1.42813	0.138351	10.3225	5.57731e-25	2.85676e-23	Up	N_WCS417_30m-N_Control	RNC	AT2G23120	--	Late embryogenesis abundant protein, group 6
Bnascaffold0530G0000600ZS	N_WCS417_30m	N_Control	1600.05	2889.64	2244.84	-0.85255	0.0826327	-10.3173	5.883e-25	3.01004e-23	Normal	N_WCS417_30m-N_Control	RNC	--	--	--
BnaC08G0166900ZS	N_WCS417_30m	N_Control	310.36	32.1512	171.256	3.27948	0.317929	10.3151	6.01972e-25	3.07663e-23	Up	N_WCS417_30m-N_Control	RNC	AT4G25640	FFT	Encodes a multidrug and toxin efflux family transporter. Involved in flavonoid metabolism, affecting Root growth, seed development and germination, and pollen development, release and viability.
BnaA10G0111200ZS	N_WCS417_30m	N_Control	2363.25	4116.62	3239.94	-0.801067	0.0777524	-10.3028	6.84442e-25	3.49431e-23	Normal	N_WCS417_30m-N_Control	RNC	AT5G54960	PDC2	pyruvate decarboxylase-2
BnaC06G0282900ZS	N_WCS417_30m	N_Control	988.225	1992.71	1490.47	-1.01192	0.0982304	-10.3015	6.93669e-25	3.53756e-23	Down	N_WCS417_30m-N_Control	RNC	AT1G58270	ZW9	ZW9 mRNA, complete cds
BnaA09G0265200ZS	N_WCS417_30m	N_Control	5280.92	3210.36	4245.64	0.71801	0.0697508	10.2939	7.50539e-25	3.82342e-23	Normal	N_WCS417_30m-N_Control	RNC	AT4G08770	Prx37	Encodes a putative apoplastic peroxidase Prx37. Primarily expressed in the vascular bundles. Overexpression renders a dwarf phenotype with smaller plants and delayed development. Plants overexpressing Prx37 also shows an increase in the amount of esterified phenolic material associated with their walls.
BnaC05G0266600ZS	N_WCS417_30m	N_Control	2454.76	1294.1	1874.43	0.923103	0.0896891	10.2922	7.63735e-25	3.88641e-23	Normal	N_WCS417_30m-N_Control	RNC	AT1G30700	AtBBE8	FAD-binding Berberine family protein
Bnascaffold1613G0000500ZS	N_WCS417_30m	N_Control	770.913	1633.63	1202.27	-1.08322	0.105263	-10.2907	7.76485e-25	3.947e-23	Down	N_WCS417_30m-N_Control	RNC	--	--	--
BnaA05G0296800ZS	N_WCS417_30m	N_Control	1547.55	2787.23	2167.39	-0.848626	0.0824884	-10.2878	7.99683e-25	4.06051e-23	Normal	N_WCS417_30m-N_Control	RNC	--	--	--
BnaA09G0285500ZS	N_WCS417_30m	N_Control	1707.82	3199.4	2453.61	-0.905504	0.0880927	-10.279	8.76428e-25	4.44538e-23	Normal	N_WCS417_30m-N_Control	RNC	--	--	--
Bnascaffold0026G0008200ZS	N_WCS417_30m	N_Control	1584.29	2828.83	2206.56	-0.836272	0.0813825	-10.2758	9.05684e-25	4.5888e-23	Normal	N_WCS417_30m-N_Control	RNC	--	--	--
BnaA06G0222600ZS	N_WCS417_30m	N_Control	1625.94	3273.17	2449.55	-1.00979	0.0982909	-10.2735	9.27933e-25	4.69644e-23	Down	N_WCS417_30m-N_Control	RNC	--	--	--
BnaA03G0536800ZS	N_WCS417_30m	N_Control	579.711	133.062	356.386	2.12574	0.206949	10.2718	9.44074e-25	4.77298e-23	Up	N_WCS417_30m-N_Control	RNC	AT4G33420	Prx47	Peroxidase superfamily protein
BnaA05G0287600ZS	N_WCS417_30m	N_Control	1302.49	2552.07	1927.28	-0.969992	0.0945133	-10.263	1.03417e-24	5.22284e-23	Normal	N_WCS417_30m-N_Control	RNC	--	--	--
BnaC08G0344400ZS	N_WCS417_30m	N_Control	516.295	120.712	318.504	2.09819	0.204715	10.2493	1.19201e-24	6.01349e-23	Up	N_WCS417_30m-N_Control	RNC	AT3G54420	EP3	encodes an EP3 chitinase that is expressed during somatic embryogenesis in 'nursing' cells surrounding the embryos but not in embryos themselves. The gene is also expressed in mature pollen and growing pollen tubes until they enter the receptive synergid, but not in endosperm and integuments as in carrot. Post-embryonically, expression is found in hydathodes, stipules, root epidermis and emerging…
BnaA10G0271900ZS	N_WCS417_30m	N_Control	3112.93	1738.81	2425.87	0.839928	0.0819818	10.2453	1.24248e-24	6.26137e-23	Normal	N_WCS417_30m-N_Control	RNC	AT3G26180	CYP71B20	putative cytochrome P450
BnaA01G0245100ZS	N_WCS417_30m	N_Control	1088.02	2116.95	1602.48	-0.96033	0.0938592	-10.2316	1.43128e-24	7.20502e-23	Normal	N_WCS417_30m-N_Control	RNC	--	--	--
BnaC03G0584400ZS	N_WCS417_30m	N_Control	2844.94	4907.63	3876.29	-0.786477	0.0768748	-10.2306	1.4459e-24	7.27083e-23	Normal	N_WCS417_30m-N_Control	RNC	--	--	--
BnaA06G0045900ZS	N_WCS417_30m	N_Control	6392.45	3970.5	5181.47	0.687395	0.0672405	10.2229	1.56538e-24	7.8632e-23	Normal	N_WCS417_30m-N_Control	RNC	AT1G07890	MEE6	Encodes a cytosolic ascorbate peroxidase APX1. Ascorbate peroxidases are enzymes that scavenge hydrogen peroxide in plant cells. Eight types of APX have been described for Arabidopsis: three cytosolic (APX1, APX2, APX6), two chloroplastic types (stromal sAPX, thylakoid tAPX), and three microsomal (APX3, APX4, APX5) isoforms. At least part of the induction of heat shock proteins during light stres…
BnaC07G0002400ZS	N_WCS417_30m	N_Control	2103.95	3728.57	2916.26	-0.82523	0.080791	-10.2144	1.70974e-24	8.57912e-23	Normal	N_WCS417_30m-N_Control	RNC	--	--	--
Bnascaffold0530G0001200ZS	N_WCS417_30m	N_Control	1627.46	2902.19	2264.83	-0.834668	0.0817169	-10.2141	1.71395e-24	8.59101e-23	Normal	N_WCS417_30m-N_Control	RNC	--	--	--
BnaC03G0093300ZS	N_WCS417_30m	N_Control	407.543	73.0617	240.302	2.483	0.243186	10.2103	1.7833e-24	8.92908e-23	Up	N_WCS417_30m-N_Control	RNC	AT3G06190	BPM2	Encodes a member of the MATH-BTB domain proteins (BPMs) that directly interact with and target for proteasomal degradation the class I homeobox-leucine zipper (HD-ZIP) transcription factor ATHB6. Known members include AT5G19000 (BPM1), AT3G06190 (BPM2), AT2G39760 (BPM3), AT3G03740 (BPM4), AT5G21010 (BPM5) and AT3G43700 (BPM6).
BnaC06G0374200ZS	N_WCS417_30m	N_Control	511.25	1207.05	859.151	-1.239	0.121402	-10.2057	1.86886e-24	9.34748e-23	Down	N_WCS417_30m-N_Control	RNC	AT1G70740	--	Protein kinase superfamily protein
BnaA05G0061400ZS	N_WCS417_30m	N_Control	561.477	1283.65	922.565	-1.1929	0.116931	-10.2017	1.94822e-24	9.73404e-23	Down	N_WCS417_30m-N_Control	RNC	AT2G40000	HSPRO2	ortholog of sugar beet HS1 PRO-1 2
BnaC08G0234200ZS	N_WCS417_30m	N_Control	1054.44	2072.44	1563.44	-0.97523	0.095636	-10.1973	2.03845e-24	1.0174e-22	Normal	N_WCS417_30m-N_Control	RNC	AT1G15690	VHP1	--
BnaA10G0100200ZS	N_WCS417_30m	N_Control	613.652	1402.25	1007.95	-1.19226	0.116934	-10.1961	2.06422e-24	1.02916e-22	Down	N_WCS417_30m-N_Control	RNC	AT5G53550	YSL3	YELLOW STRIPE like 3
Bnascaffold0027G0030100ZS	N_WCS417_30m	N_Control	1711.12	3160.98	2436.05	-0.885044	0.0868226	-10.1937	2.11532e-24	1.05352e-22	Normal	N_WCS417_30m-N_Control	RNC	--	--	--
Bnascaffold0031G0001500ZS	N_WCS417_30m	N_Control	3123.85	5650.59	4387.22	-0.854799	0.0838707	-10.1919	2.15565e-24	1.07246e-22	Normal	N_WCS417_30m-N_Control	RNC	--	--	--
BnaA01G0242200ZS	N_WCS417_30m	N_Control	3076.77	5315.14	4195.95	-0.788516	0.0774175	-10.1852	2.30776e-24	1.14692e-22	Normal	N_WCS417_30m-N_Control	RNC	--	--	--
BnaA05G0308400ZS	N_WCS417_30m	N_Control	862.964	1768.17	1315.57	-1.03525	0.1017	-10.1795	2.44711e-24	1.21489e-22	Down	N_WCS417_30m-N_Control	RNC	--	--	--
BnaA04G0156100ZS	N_WCS417_30m	N_Control	206.726	689.18	447.953	-1.73627	0.170769	-10.1674	2.77222e-24	1.37483e-22	Down	N_WCS417_30m-N_Control	RNC	AT2G23760	SAW2	Encodes a member of the BEL family of homeodomain proteins. Plants doubly mutant for saw1/saw2 (blh2/blh4) have serrated leaves. BP is expressed in the serrated leaves, therefore saw2 and saw1 may act redundantly to repress BP in leaves.
Bnascaffold0055G0000600ZS	N_WCS417_30m	N_Control	1164.77	2260.8	1712.78	-0.956325	0.0941288	-10.1597	2.99859e-24	1.48552e-22	Normal	N_WCS417_30m-N_Control	RNC	--	--	--
BnaA05G0265300ZS	N_WCS417_30m	N_Control	697.838	1548.83	1123.34	-1.15058	0.113256	-10.1591	3.01769e-24	1.4934e-22	Down	N_WCS417_30m-N_Control	RNC	--	--	--
BnaA09G0061000ZS	N_WCS417_30m	N_Control	1509.6	655.727	1082.66	1.20391	0.118524	10.1575	3.06851e-24	1.51695e-22	Up	N_WCS417_30m-N_Control	RNC	AT5G26340	STP13	Encodes a protein with high affinity, hexose-specific/H+ symporter activity. The activity of the transporter appears to be negatively regulated by phosphorylation. Importantly, microarray analysis, as well as the study of the expression of this gene in mutants involved in programmed cell death (PCD) demonstrated a tight correlation between this gene's expression and PCD.
Bnascaffold0037G0001000ZS	N_WCS417_30m	N_Control	1506.95	2694.7	2100.82	-0.838353	0.082542	-10.1567	3.09434e-24	1.52811e-22	Normal	N_WCS417_30m-N_Control	RNC	--	--	--
BnaA09G0355800ZS	N_WCS417_30m	N_Control	1640.57	2904.22	2272.39	-0.82417	0.0812259	-10.1466	3.42958e-24	1.69188e-22	Normal	N_WCS417_30m-N_Control	RNC	--	--	--
BnaA05G0264100ZS	N_WCS417_30m	N_Control	1042.6	2047.74	1545.17	-0.974215	0.0960164	-10.1463	3.44025e-24	1.69536e-22	Normal	N_WCS417_30m-N_Control	RNC	--	--	--
BnaA06G0117300ZS	N_WCS417_30m	N_Control	1162.19	477.958	820.073	1.28266	0.126443	10.1442	3.51749e-24	1.7316e-22	Up	N_WCS417_30m-N_Control	RNC	AT1G17147	--	VQ motif-containing protein
Bnascaffold0031G0001100ZS	N_WCS417_30m	N_Control	2510.5	4648.14	3579.32	-0.88836	0.087586	-10.1427	3.57023e-24	1.75572e-22	Normal	N_WCS417_30m-N_Control	RNC	--	--	--
BnaA01G0322600ZS	N_WCS417_30m	N_Control	643.427	1415.22	1029.32	-1.13692	0.112248	-10.1286	4.12693e-24	2.02735e-22	Down	N_WCS417_30m-N_Control	RNC	AT3G19030	--	--
BnaA03G0200500ZS	N_WCS417_30m	N_Control	1608.35	767.95	1188.15	1.06683	0.105352	10.1263	4.22474e-24	2.07322e-22	Up	N_WCS417_30m-N_Control	RNC	AT2G40890	REF8	encodes coumarate 3-hydroxylase (C3H), a P450-dependent monooxygenase. Involved in lignin biosynthesis and flavonoid biosynthesis. Also affects the biosynthesis of coumarins such as scopoletin and scopolin as a branching-out-pathway from the phenylpropanoid acid level.
BnaA06G0250100ZS	N_WCS417_30m	N_Control	981.387	1919.72	1450.55	-0.96784	0.0955955	-10.1243	4.30936e-24	2.11253e-22	Normal	N_WCS417_30m-N_Control	RNC	--	--	--
BnaC07G0291000ZS	N_WCS417_30m	N_Control	1052.19	384.184	718.186	1.45214	0.143449	10.123	4.36705e-24	2.13858e-22	Up	N_WCS417_30m-N_Control	RNC	AT3G25800	PR 65	one of three genes encoding the protein phosphatase 2A regulatory subunit
BnaC03G0585000ZS	N_WCS417_30m	N_Control	2826.51	4799.56	3813.03	-0.763761	0.0754992	-10.1161	4.68515e-24	2.29196e-22	Normal	N_WCS417_30m-N_Control	RNC	--	--	--
BnaA05G0371400ZS	N_WCS417_30m	N_Control	254.306	20.9387	137.622	3.59901	0.355905	10.1123	4.8741e-24	2.3819e-22	Up	N_WCS417_30m-N_Control	RNC	AT3G18773	ATL77	RING/U-box superfamily protein
Bnascaffold2170G0000200ZS	N_WCS417_30m	N_Control	1420.31	2725.91	2073.11	-0.940133	0.092996	-10.1094	5.01945e-24	2.45037e-22	Normal	N_WCS417_30m-N_Control	RNC	--	--	--
Bnascaffold1759G0000300ZS	N_WCS417_30m	N_Control	904.242	1832.49	1368.37	-1.01876	0.100854	-10.1013	5.44882e-24	2.65721e-22	Down	N_WCS417_30m-N_Control	RNC	--	--	--
Bnascaffold0035G0001000ZS	N_WCS417_30m	N_Control	1026.15	1993.74	1509.94	-0.957995	0.094928	-10.0918	6.00554e-24	2.92566e-22	Normal	N_WCS417_30m-N_Control	RNC	--	--	--
BnaA07G0286000ZS	N_WCS417_30m	N_Control	3104.69	1772.57	2438.63	0.808968	0.0801647	10.0913	6.03532e-24	2.9371e-22	Normal	N_WCS417_30m-N_Control	RNC	AT1G66260	IRP8	RNA-binding (RRM/RBD/RNP motifs) family protein
BnaA09G0406600ZS	N_WCS417_30m	N_Control	1986.37	971.243	1478.81	1.03141	0.102212	10.0909	6.06396e-24	2.94798e-22	Up	N_WCS417_30m-N_Control	RNC	AT1G30700	AtBBE8	FAD-binding Berberine family protein
Bnascaffold1819G0000100ZS	N_WCS417_30m	N_Control	1659.01	2910.6	2284.8	-0.810993	0.0804189	-10.0846	6.4624e-24	3.13842e-22	Normal	N_WCS417_30m-N_Control	RNC	--	--	--
Bnascaffold0066G0000200ZS	N_WCS417_30m	N_Control	1589.08	2854.46	2221.77	-0.844745	0.0838259	-10.0774	6.95615e-24	3.37471e-22	Normal	N_WCS417_30m-N_Control	RNC	--	--	--
Bnascaffold0516G0000700ZS	N_WCS417_30m	N_Control	1417.17	2604.14	2010.66	-0.877582	0.0870955	-10.0761	7.04775e-24	3.4156e-22	Normal	N_WCS417_30m-N_Control	RNC	--	--	--
Bnascaffold0031G0001800ZS	N_WCS417_30m	N_Control	3648.35	6536.12	5092.23	-0.840875	0.0834694	-10.074	7.19532e-24	3.48352e-22	Normal	N_WCS417_30m-N_Control	RNC	--	--	--
Bnascaffold0853G0000100ZS	N_WCS417_30m	N_Control	1249.13	2316.28	1782.71	-0.890867	0.0884406	-10.0731	7.2684e-24	3.51526e-22	Normal	N_WCS417_30m-N_Control	RNC	--	--	--
BnaA01G0239400ZS	N_WCS417_30m	N_Control	3869.88	6328.17	5099.02	-0.709245	0.0704658	-10.0651	7.8811e-24	3.80765e-22	Normal	N_WCS417_30m-N_Control	RNC	--	--	--
Bnascaffold0175G0000100ZS	N_WCS417_30m	N_Control	1503.21	2684.95	2094.08	-0.836745	0.0831645	-10.0613	8.18884e-24	3.95226e-22	Normal	N_WCS417_30m-N_Control	RNC	--	--	--
BnaA09G0306200ZS	N_WCS417_30m	N_Control	681.394	1454.95	1068.17	-1.09457	0.108829	-10.0577	8.49917e-24	4.09781e-22	Down	N_WCS417_30m-N_Control	RNC	--	--	--
BnaA06G0143800ZS	N_WCS417_30m	N_Control	2669.41	4447.23	3558.32	-0.736273	0.0732171	-10.056	8.64193e-24	4.16235e-22	Normal	N_WCS417_30m-N_Control	RNC	AT1G20450	LTI45	Encodes a gene induced by low temperature and dehydration. Inhibits e.coli growth while overexpressed. Belongs to the dehydrin protein family, which contains highly conserved stretches of 7-17 residues that are repetitively scattered in their sequences, the K-, S-, Y- and lysine rich segments. LTI29 and LTI30 double overexpressors confer cold tolerance. Localized to membranes and cytoplasm.
Bnascaffold0055G0000400ZS	N_WCS417_30m	N_Control	1107.28	2093	1600.14	-0.918515	0.0913724	-10.0524	8.96233e-24	4.31224e-22	Normal	N_WCS417_30m-N_Control	RNC	--	--	--
BnaA01G0314700ZS	N_WCS417_30m	N_Control	550.667	139.788	345.227	1.97607	0.196649	10.0487	9.31125e-24	4.47552e-22	Up	N_WCS417_30m-N_Control	RNC	AT3G20340	--	Expression of the gene is downregulated in the presence of paraquat, an inducer of photoxidative stress.
BnaA04G0265300ZS	N_WCS417_30m	N_Control	582.71	155.722	369.216	1.90436	0.189522	10.0482	9.35181e-24	4.4904e-22	Up	N_WCS417_30m-N_Control	RNC	AT2G41480	PRX25	Encodes a cationic cell-wall-bound peroxidase homolog that is involved in the lignification of cell walls.
BnaA05G0205900ZS	N_WCS417_30m	N_Control	715.127	1533.68	1124.4	-1.10059	0.109587	-10.043	9.86077e-24	4.72994e-22	Down	N_WCS417_30m-N_Control	RNC	--	--	--
BnaA04G0236600ZS	N_WCS417_30m	N_Control	1119.16	449.646	784.404	1.31626	0.131084	10.0414	1.00284e-23	4.80541e-22	Up	N_WCS417_30m-N_Control	RNC	AT2G36880	MAT3	methionine adenosyltransferase 3
BnaA05G0253900ZS	N_WCS417_30m	N_Control	1224.78	2303.58	1764.18	-0.911075	0.0907424	-10.0402	1.01436e-23	4.85566e-22	Normal	N_WCS417_30m-N_Control	RNC	--	--	--
Bnascaffold0027G0056200ZS	N_WCS417_30m	N_Control	1314.86	2439.81	1877.34	-0.891739	0.0888555	-10.0358	1.06063e-23	5.07196e-22	Normal	N_WCS417_30m-N_Control	RNC	--	--	--
BnaA05G0308800ZS	N_WCS417_30m	N_Control	961.044	1890.73	1425.89	-0.976019	0.0972644	-10.0347	1.07293e-23	5.12555e-22	Normal	N_WCS417_30m-N_Control	RNC	--	--	--
BnaA06G0452100ZS	N_WCS417_30m	N_Control	713.067	225.825	469.446	1.6585	0.165597	10.0153	1.30592e-23	6.23218e-22	Up	N_WCS417_30m-N_Control	RNC	AT3G45970	EXPL1	member of EXPANSIN-LIKE. Naming convention from the Expansin Working Group (Kende et al, 2004. Plant Mol Bio)
BnaA10G0150300ZS	N_WCS417_30m	N_Control	627.623	1369.98	998.803	-1.126	0.112462	-10.0123	1.34609e-23	6.41737e-22	Down	N_WCS417_30m-N_Control	RNC	AT5G59550	RDUF2	Encodes an ABA- and drought-induced RING-DUF1117 gene whose mutation results in hyposensitive phenotypes toward ABA in terms of germination rate and stomatal closure and markedly reduced tolerance to drought stress relative to wild-type plants.
BnaC07G0549300ZS	N_WCS417_30m	N_Control	254.458	22.247	138.353	3.51949	0.351594	10.0101	1.37628e-23	6.5546e-22	Up	N_WCS417_30m-N_Control	RNC	AT4G38420	sks9	SKU5 similar 9
Bnascaffold0025G0012900ZS	N_WCS417_30m	N_Control	3637.2	6330.35	4983.77	-0.799324	0.079862	-10.0088	1.39412e-23	6.63285e-22	Normal	N_WCS417_30m-N_Control	RNC	--	--	--
BnaA01G0125000ZS	N_WCS417_30m	N_Control	526.053	127.666	326.86	2.04489	0.20446	10.0014	1.50274e-23	7.14236e-22	Up	N_WCS417_30m-N_Control	RNC	AT4G22590	TPPG	Haloacid dehalogenase-like hydrolase (HAD) superfamily protein
BnaA09G0355600ZS	N_WCS417_30m	N_Control	986.978	2022.51	1504.74	-1.0357	0.103592	-9.9979	1.55666e-23	7.39115e-22	Down	N_WCS417_30m-N_Control	RNC	--	--	--
BnaC06G0427100ZS	N_WCS417_30m	N_Control	736.796	1536.77	1136.79	-1.06038	0.106093	-9.99473	1.60727e-23	7.62371e-22	Down	N_WCS417_30m-N_Control	RNC	AT1G76650	CML38	calmodulin-like 38
BnaC05G0111600ZS	N_WCS417_30m	N_Control	1173.36	452.61	812.988	1.37358	0.137467	9.99204	1.65149e-23	7.82554e-22	Up	N_WCS417_30m-N_Control	RNC	AT1G14040	PHO1;H3	EXS (ERD1/XPR1/SYG1) family protein
BnaA09G0286500ZS	N_WCS417_30m	N_Control	901.575	1819.69	1360.63	-1.01341	0.101433	-9.99093	1.67001e-23	7.90528e-22	Down	N_WCS417_30m-N_Control	RNC	--	--	--
BnaA01G0243600ZS	N_WCS417_30m	N_Control	1553.61	2751.97	2152.79	-0.824751	0.0826125	-9.98338	1.80223e-23	8.52254e-22	Normal	N_WCS417_30m-N_Control	RNC	--	--	--
BnaC08G0372300ZS	N_WCS417_30m	N_Control	1117.2	458.81	788.004	1.2832	0.128614	9.97712	1.91949e-23	9.06787e-22	Up	N_WCS417_30m-N_Control	RNC	AT3G57330	ACA11	Lesion mimic phenotype when mutation in the gene is combined with a mutation in ACA4. Lesion mimic phenotype of double knockout can be suppressed by nutritional supplements that increase anion levels (e.g. 15 mM Nitrate, Chloride, or Phosphate)
BnaA06G0351600ZS	N_WCS417_30m	N_Control	826.184	1745.19	1285.69	-1.07846	0.108121	-9.97459	1.96913e-23	9.293e-22	Down	N_WCS417_30m-N_Control	RNC	AT5G27120	--	SAR DNA-binding protein, putative, strong similarity to SAR DNA-binding protein-1 (Pisum sativum) GI:3132696; contains Pfam profile PF01798: Putative snoRNA binding domain; has similarity to MAR binding NOP58 protein
BnaC04G0600000ZS	N_WCS417_30m	N_Control	952.591	367.562	660.076	1.37404	0.137821	9.96981	2.06626e-23	9.74161e-22	Up	N_WCS417_30m-N_Control	RNC	AT2G44450	BGLU15	beta glucosidase 15
Bnascaffold0026G0019600ZS	N_WCS417_30m	N_Control	1477.23	2706.27	2091.75	-0.873426	0.0876435	-9.96568	2.15401e-23	1.01451e-21	Normal	N_WCS417_30m-N_Control	RNC	--	--	--
BnaA05G0216900ZS	N_WCS417_30m	N_Control	1498.95	2810.93	2154.94	-0.907615	0.091188	-9.95323	2.44117e-23	1.1486e-21	Normal	N_WCS417_30m-N_Control	RNC	--	--	--
BnaA05G0293300ZS	N_WCS417_30m	N_Control	972.984	1914.98	1443.98	-0.976475	0.0981144	-9.95241	2.46138e-23	1.15695e-21	Normal	N_WCS417_30m-N_Control	RNC	--	--	--
Bnascaffold0040G0000300ZS	N_WCS417_30m	N_Control	1499.65	2733.68	2116.66	-0.866061	0.0870353	-9.95069	2.5044e-23	1.17599e-21	Normal	N_WCS417_30m-N_Control	RNC	--	--	--
Bnascaffold0122G0000400ZS	N_WCS417_30m	N_Control	1034.11	1983.11	1508.61	-0.939337	0.0944449	-9.94587	2.62862e-23	1.23308e-21	Normal	N_WCS417_30m-N_Control	RNC	--	--	--
BnaA03G0499300ZS	N_WCS417_30m	N_Control	316.247	864.026	590.136	-1.4502	0.146099	-9.92611	3.20502e-23	1.50197e-21	Down	N_WCS417_30m-N_Control	RNC	AT4G27657	--	--
Bnascaffold1759G0000500ZS	N_WCS417_30m	N_Control	992.566	1938.91	1465.74	-0.96563	0.0973388	-9.92029	3.39768e-23	1.59066e-21	Normal	N_WCS417_30m-N_Control	RNC	--	--	--
BnaC09G0317700ZS	N_WCS417_30m	N_Control	2409.82	4065.09	3237.45	-0.754099	0.0760184	-9.91995	3.40935e-23	1.59452e-21	Normal	N_WCS417_30m-N_Control	RNC	--	--	--
Bnascaffold1519G0000200ZS	N_WCS417_30m	N_Control	785.312	1617.83	1201.57	-1.04304	0.105171	-9.91754	3.49241e-23	1.63174e-21	Down	N_WCS417_30m-N_Control	RNC	--	--	--
BnaA07G0228800ZS	N_WCS417_30m	N_Control	492.248	1158.06	825.153	-1.23375	0.124445	-9.91406	3.61639e-23	1.68799e-21	Down	N_WCS417_30m-N_Control	RNC	AT1G80840	WRKY40	Pathogen-induced transcription factor. Binds W-box sequences in vitro. Forms protein complexes with itself and with WRKY40 and WRKY60. Coexpression with WRKY18 or WRKY60 made plants more susceptible to both P. syringae and B. cinerea. WRKY18, WRKY40, and WRKY60 have partially redundant roles in response to the hemibiotrophic bacterial pathogen Pseudomonas syringae and the necrotrophic fungal path…
BnaC05G0006600ZS	N_WCS417_30m	N_Control	3939.91	2400.18	3170.04	0.714934	0.0721316	9.91152	3.70951e-23	1.72972e-21	Normal	N_WCS417_30m-N_Control	RNC	AT1G01550	BPS1	Encodes a protein with no functionally characterized domains that to prevent the synthesis of a novel substance that moves from the root to the shoot, where it modifies shoot growth by interfering with auxin signaling. Synthesis and delivery of this substance requires neither phloem nor endodermis.
BnaA07G0051500ZS	N_WCS417_30m	N_Control	899.349	1809.1	1354.22	-1.00785	0.10176	-9.90422	3.99089e-23	1.85837e-21	Down	N_WCS417_30m-N_Control	RNC	--	--	--
BnaA09G0308100ZS	N_WCS417_30m	N_Control	1041.51	2055.63	1548.57	-0.980842	0.0990334	-9.90415	3.99335e-23	1.85837e-21	Normal	N_WCS417_30m-N_Control	RNC	--	--	--
Bnascaffold0516G0001000ZS	N_WCS417_30m	N_Control	1554.26	2887.66	2220.96	-0.893799	0.090271	-9.90129	4.10956e-23	1.91056e-21	Normal	N_WCS417_30m-N_Control	RNC	--	--	--
BnaC01G0015600ZS	N_WCS417_30m	N_Control	559.78	145.348	352.564	1.94316	0.196275	9.90017	4.1555e-23	1.93e-21	Up	N_WCS417_30m-N_Control	RNC	AT4G37610	BT5	BTB and TAZ domain protein. Located in cytoplasm and expressed in fruit, flower and leaves.
BnaC04G0327600ZS	N_WCS417_30m	N_Control	944.652	363.26	653.956	1.3786	0.139278	9.89817	4.23955e-23	1.96709e-21	Up	N_WCS417_30m-N_Control	RNC	AT3G54140	PTR1	Encodes a di- and tri-peptide transporter that recognizes a variety of different amino acid combinations. GFP-tagged PTR1 localizes to the plasma membrane and has 8 to 11 predicted transmembrane domains. PTR1 is expressed in a number of different vascular tissues throughout the plant based on promoter:GUS expression analysis. ptr1 mutants have a lower dry weight than wild type plants when both ar…
BnaA05G0260600ZS	N_WCS417_30m	N_Control	1213.02	2322.09	1767.56	-0.936348	0.0946452	-9.89325	4.45325e-23	2.06419e-21	Normal	N_WCS417_30m-N_Control	RNC	--	--	--
Bnascaffold2179G0000500ZS	N_WCS417_30m	N_Control	2112.48	3881.47	2996.97	-0.877167	0.0887027	-9.88884	4.65397e-23	2.1551e-21	Normal	N_WCS417_30m-N_Control	RNC	--	--	--
BnaC02G0307900ZS	N_WCS417_30m	N_Control	289.453	808.796	549.124	-1.48299	0.150049	-9.8834	4.91392e-23	2.27322e-21	Down	N_WCS417_30m-N_Control	RNC	AT1G77760	NR1	Encodes the cytosolic minor isoform of nitrate reductase (NR). Involved in the first step of nitrate assimilation, it contributes about 15% of the nitrate reductase activity in shoots. Similar to molybdopterin oxidoreductases at the N-terminus, and to FAD/NAD-binding cytochrome reductases at the C-terminus. Cofactors: FAD, heme iron (cytochrome B-557), and molybdenum-pterin.
BnaC01G0083700ZS	N_WCS417_30m	N_Control	2057.8	1048.57	1553.18	0.973353	0.0986107	9.87066	5.57938e-23	2.57852e-21	Normal	N_WCS417_30m-N_Control	RNC	AT4G30280	XTH18	Encodes a xyloglucan endotransglucosylase/hydrolase with only only the endotransglucosylase (XET; EC 2.4.1.207) activity towards xyloglucan and non-detectable endohydrolytic (XEH; EC 3.2.1.151) activity. Expressed in the mature or basal regions of both the main and lateral roots, but not in the tip of these roots where cell division occurs.
BnaC05G0142600ZS	N_WCS417_30m	N_Control	1564.03	759.852	1161.94	1.04141	0.105507	9.87056	5.58498e-23	2.57857e-21	Up	N_WCS417_30m-N_Control	RNC	AT1G78570	ROL1	Encodes a UDP-L-Rhamnose synthase involved in the biosynthesis of rhamnose, a major monosaccharide component of pectin. Catalyzes the conversion of UDP-D-Glc to UDP-L-Rha. The dehydrogenase domain of RHM1 was shown to catalyze the conversion of UDP-D-Glc to the reaction intermediate UDP-4-keto-6-deoxy-D-Glc using recombinant protein assay but the activity of the full-length protein was not determ…
BnaC05G0449400ZS	N_WCS417_30m	N_Control	1159.96	489.419	824.691	1.24566	0.126298	9.8628	6.03411e-23	2.78318e-21	Up	N_WCS417_30m-N_Control	RNC	AT3G16530	--	Lectin like protein whose expression is induced upon treatment with chitin oligomers.
BnaA09G0311300ZS	N_WCS417_30m	N_Control	940.144	1996.73	1468.44	-1.08626	0.11014	-9.86257	6.04783e-23	2.78676e-21	Down	N_WCS417_30m-N_Control	RNC	--	--	--
BnaC07G0002300ZS	N_WCS417_30m	N_Control	1867.47	3384.92	2626.2	-0.857939	0.0870121	-9.85999	6.20527e-23	2.8548e-21	Normal	N_WCS417_30m-N_Control	RNC	--	--	--
BnaA03G0346400ZS	N_WCS417_30m	N_Control	230.222	705.375	467.799	-1.6147	0.163764	-9.85996	6.20767e-23	2.8548e-21	Down	N_WCS417_30m-N_Control	RNC	AT3G16510	--	Calcium-dependent lipid-binding (CaLB domain) family protein
BnaA05G0267400ZS	N_WCS417_30m	N_Control	1200.56	2280.45	1740.5	-0.925574	0.0938794	-9.85918	6.25596e-23	2.87418e-21	Normal	N_WCS417_30m-N_Control	RNC	--	--	--
BnaA03G0220100ZS	N_WCS417_30m	N_Control	1082.85	451.992	767.42	1.26028	0.127847	9.85769	6.34903e-23	2.91408e-21	Up	N_WCS417_30m-N_Control	RNC	AT2G45300	--	encodes 3-phosphoshikimate 1-carboxyvinyltransferase / 5-enolpyruvylshikimate-3-phosphate / EPSP synthase involved in chorismate biosynthesis
BnaA09G0336900ZS	N_WCS417_30m	N_Control	856.735	1715.77	1286.25	-1.00206	0.10173	-9.85016	6.84368e-23	3.13804e-21	Down	N_WCS417_30m-N_Control	RNC	--	--	--
BnaA05G0203300ZS	N_WCS417_30m	N_Control	534.769	1221.87	878.319	-1.19256	0.121431	-9.8209	9.15246e-23	4.19258e-21	Down	N_WCS417_30m-N_Control	RNC	--	--	--
Bnascaffold0034G0001200ZS	N_WCS417_30m	N_Control	2482.73	4432.73	3457.73	-0.83594	0.0851581	-9.81633	9.57625e-23	4.38242e-21	Normal	N_WCS417_30m-N_Control	RNC	--	--	--
Bnascaffold1516G0000100ZS	N_WCS417_30m	N_Control	2468.52	4202.24	3335.38	-0.767304	0.0782087	-9.81099	1.00978e-22	4.61657e-21	Normal	N_WCS417_30m-N_Control	RNC	--	--	--
Bnascaffold1819G0000300ZS	N_WCS417_30m	N_Control	1564.22	2728.14	2146.18	-0.802375	0.0818084	-9.80797	1.04039e-22	4.7519e-21	Normal	N_WCS417_30m-N_Control	RNC	--	--	--
BnaC03G0795800ZS	N_WCS417_30m	N_Control	152.636	539.878	346.257	-1.82274	0.186007	-9.79934	1.13328e-22	5.17111e-21	Down	N_WCS417_30m-N_Control	RNC	AT3G15210	RAP2.5	Encodes a member of the ERF (ethylene response factor) subfamily B-1 of ERF/AP2 transcription factor family (ATERF-4). The protein contains one AP2 domain. Acts as a negative regulator of JA-responsive defense gene expression and resistance to the necrotrophic fungal pathogen Fusarium oxysporum and antagonizes JA inhibition of root elongation.
Bnascaffold0026G0022000ZS	N_WCS417_30m	N_Control	1267.81	2604.74	1936.28	-1.03831	0.105984	-9.79683	1.16174e-22	5.29583e-21	Down	N_WCS417_30m-N_Control	RNC	--	--	--
Bnascaffold0573G0000300ZS	N_WCS417_30m	N_Control	1113.74	2078.28	1596.01	-0.900046	0.0918821	-9.79567	1.17521e-22	5.35199e-21	Normal	N_WCS417_30m-N_Control	RNC	--	--	--
BnaA09G0290800ZS	N_WCS417_30m	N_Control	1014.3	2107.74	1561.02	-1.05579	0.107859	-9.78862	1.26004e-22	5.73273e-21	Down	N_WCS417_30m-N_Control	RNC	--	--	--
Bnascaffold0283G0000100ZS	N_WCS417_30m	N_Control	1555.5	2764.47	2159.99	-0.829322	0.0847278	-9.78808	1.26684e-22	5.75808e-21	Normal	N_WCS417_30m-N_Control	RNC	--	--	--
Bnascaffold0026G0052500ZS	N_WCS417_30m	N_Control	2309.71	4000.82	3155.27	-0.792302	0.0809563	-9.78678	1.28316e-22	5.8266e-21	Normal	N_WCS417_30m-N_Control	RNC	--	--	--
BnaC05G0012900ZS	N_WCS417_30m	N_Control	1345.65	562.367	954.008	1.26009	0.12877	9.78559	1.29834e-22	5.88983e-21	Up	N_WCS417_30m-N_Control	RNC	AT1G02360	--	Chitinase family protein
BnaA09G0072200ZS	N_WCS417_30m	N_Control	487.427	114.648	301.037	2.09046	0.213678	9.78319	1.32949e-22	6.02531e-21	Up	N_WCS417_30m-N_Control	RNC	AT5G23490	--	--
BnaA07G0141300ZS	N_WCS417_30m	N_Control	277.954	30.9282	154.441	3.17446	0.324525	9.78185	1.34723e-22	6.09978e-21	Up	N_WCS417_30m-N_Control	RNC	AT5G67310	CYP81G1	member of CYP81G
Bnascaffold0170G0000200ZS	N_WCS417_30m	N_Control	1731.32	3006.85	2369.08	-0.796146	0.0814366	-9.77627	1.42366e-22	6.4396e-21	Normal	N_WCS417_30m-N_Control	RNC	--	--	--
Bnascaffold0083G0000100ZS	N_WCS417_30m	N_Control	2220.05	3852.18	3036.11	-0.794708	0.0813046	-9.77446	1.44932e-22	6.54937e-21	Normal	N_WCS417_30m-N_Control	RNC	--	--	--
BnaC04G0119100ZS	N_WCS417_30m	N_Control	274.554	28.6531	151.603	3.26762	0.334436	9.77056	1.50618e-22	6.79975e-21	Up	N_WCS417_30m-N_Control	RNC	AT2G34930	--	disease resistance family protein / LRR family protein
Bnascaffold0417G0000200ZS	N_WCS417_30m	N_Control	1446.66	2605.86	2026.26	-0.84867	0.0869298	-9.7627	1.62767e-22	7.34113e-21	Normal	N_WCS417_30m-N_Control	RNC	--	--	--
BnaA06G0232200ZS	N_WCS417_30m	N_Control	516.427	1200.43	858.43	-1.21738	0.124823	-9.75286	1.7935e-22	8.08126e-21	Down	N_WCS417_30m-N_Control	RNC	--	--	--
BnaC06G0434700ZS	N_WCS417_30m	N_Control	4209.63	6340.44	5275.03	-0.590834	0.0605818	-9.75267	1.79676e-22	8.08819e-21	Normal	N_WCS417_30m-N_Control	RNC	AT1G77760	NR1	Encodes the cytosolic minor isoform of nitrate reductase (NR). Involved in the first step of nitrate assimilation, it contributes about 15% of the nitrate reductase activity in shoots. Similar to molybdopterin oxidoreductases at the N-terminus, and to FAD/NAD-binding cytochrome reductases at the C-terminus. Cofactors: FAD, heme iron (cytochrome B-557), and molybdenum-pterin.
BnaA10G0048700ZS	N_WCS417_30m	N_Control	1149.25	497.794	823.521	1.20732	0.12381	9.75143	1.81897e-22	8.18028e-21	Up	N_WCS417_30m-N_Control	RNC	AT1G06800	PLA-I{gamma}1	Encodes a lipase that hydrolyzes phosphatidylcholine, glycolipids as well as triacylglycerols.
Bnascaffold0556G0000600ZS	N_WCS417_30m	N_Control	905.888	1766.17	1336.03	-0.963239	0.0988749	-9.742	1.99586e-22	8.96719e-21	Normal	N_WCS417_30m-N_Control	RNC	--	--	--
BnaA05G0299000ZS	N_WCS417_30m	N_Control	960.031	2012.97	1486.5	-1.06893	0.109742	-9.74037	2.02815e-22	9.10353e-21	Down	N_WCS417_30m-N_Control	RNC	--	--	--
Bnascaffold0031G0000800ZS	N_WCS417_30m	N_Control	1928.46	3573.38	2750.92	-0.889406	0.0914295	-9.72778	2.2955e-22	1.02937e-20	Normal	N_WCS417_30m-N_Control	RNC	--	--	--
BnaC04G0160700ZS	N_WCS417_30m	N_Control	916.618	1796.66	1356.64	-0.971071	0.0999654	-9.71407	2.62643e-22	1.17664e-20	Normal	N_WCS417_30m-N_Control	RNC	--	--	--
BnaA03G0514100ZS	N_WCS417_30m	N_Control	216.969	6.27807	111.624	5.11688	0.526975	9.7099	2.73602e-22	1.22457e-20	Up	N_WCS417_30m-N_Control	RNC	AT4G29930	--	basic helix-loop-helix (bHLH) DNA-binding superfamily protein
Bnascaffold1635G0001400ZS	N_WCS417_30m	N_Control	1192.71	2264.25	1728.48	-0.924499	0.095233	-9.70775	2.79426e-22	1.24944e-20	Normal	N_WCS417_30m-N_Control	RNC	--	--	--
BnaA06G0100200ZS	N_WCS417_30m	N_Control	637.27	176.02	406.645	1.85484	0.19112	9.70513	2.86714e-22	1.2808e-20	Up	N_WCS417_30m-N_Control	RNC	AT1G15040	GAT1_2.1	Encodes a nitrogen regulated putative glutamine amidotransferase that represses shoot branching.
BnaC03G0315000ZS	N_WCS417_30m	N_Control	2178.54	3618.74	2898.64	-0.732381	0.0754743	-9.70372	2.9071e-22	1.29742e-20	Normal	N_WCS417_30m-N_Control	RNC	AT4G04830	MSRB5	methionine sulfoxide reductase B5
Bnascaffold0026G0007400ZS	N_WCS417_30m	N_Control	1632.5	2877.37	2254.93	-0.817701	0.0842735	-9.70294	2.92919e-22	1.30603e-20	Normal	N_WCS417_30m-N_Control	RNC	--	--	--
Bnascaffold0026G0037100ZS	N_WCS417_30m	N_Control	1813.35	3281.21	2547.28	-0.855394	0.0881782	-9.70074	2.99323e-22	1.33331e-20	Normal	N_WCS417_30m-N_Control	RNC	--	--	--
Bnascaffold0204G0000100ZS	N_WCS417_30m	N_Control	870.097	1705.42	1287.76	-0.970826	0.100158	-9.69296	3.23038e-22	1.43758e-20	Normal	N_WCS417_30m-N_Control	RNC	--	--	--
Bnascaffold0047G0000200ZS	N_WCS417_30m	N_Control	1702.94	2950.55	2326.74	-0.792797	0.0818469	-9.68635	3.44641e-22	1.53226e-20	Normal	N_WCS417_30m-N_Control	RNC	--	--	--
BnaA02G0223500ZS	N_WCS417_30m	N_Control	1627.93	2908.01	2267.97	-0.837223	0.086441	-9.68548	3.47555e-22	1.54375e-20	Normal	N_WCS417_30m-N_Control	RNC	AT1G76810	eIF5B1	eukaryotic translation initiation factor 2 (eIF-2) family protein
Bnascaffold0026G0009500ZS	N_WCS417_30m	N_Control	1624.5	2868.06	2246.28	-0.819801	0.0847621	-9.67178	3.974e-22	1.76348e-20	Normal	N_WCS417_30m-N_Control	RNC	--	--	--
Bnascaffold0037G0000700ZS	N_WCS417_30m	N_Control	1330.24	2417.92	1874.08	-0.862243	0.0891569	-9.67107	4.00166e-22	1.77407e-20	Normal	N_WCS417_30m-N_Control	RNC	--	--	--
BnaC01G0433800ZS	N_WCS417_30m	N_Control	191.661	616.466	404.063	-1.68541	0.174316	-9.66867	4.09683e-22	1.81454e-20	Down	N_WCS417_30m-N_Control	RNC	AT3G15210	RAP2.5	Encodes a member of the ERF (ethylene response factor) subfamily B-1 of ERF/AP2 transcription factor family (ATERF-4). The protein contains one AP2 domain. Acts as a negative regulator of JA-responsive defense gene expression and resistance to the necrotrophic fungal pathogen Fusarium oxysporum and antagonizes JA inhibition of root elongation.
BnaA05G0291400ZS	N_WCS417_30m	N_Control	622.302	1343.59	982.946	-1.11078	0.114994	-9.65943	4.4836e-22	1.98397e-20	Down	N_WCS417_30m-N_Control	RNC	--	--	--
BnaA05G0225300ZS	N_WCS417_30m	N_Control	1094.06	2046.95	1570.51	-0.903946	0.0936428	-9.65312	4.76824e-22	2.10793e-20	Normal	N_WCS417_30m-N_Control	RNC	--	--	--
Bnascaffold0039G0000500ZS	N_WCS417_30m	N_Control	2147.51	3897.51	3022.51	-0.859464	0.089061	-9.65029	4.90187e-22	2.16496e-20	Normal	N_WCS417_30m-N_Control	RNC	--	--	--
BnaA05G0193600ZS	N_WCS417_30m	N_Control	1188.47	2235.78	1712.13	-0.911788	0.0945102	-9.64751	5.03645e-22	2.2223e-20	Normal	N_WCS417_30m-N_Control	RNC	--	--	--
BnaA06G0249100ZS	N_WCS417_30m	N_Control	883.429	1734.31	1308.87	-0.972996	0.1009	-9.64319	5.253e-22	2.31567e-20	Normal	N_WCS417_30m-N_Control	RNC	--	--	--
BnaC03G0640200ZS	N_WCS417_30m	N_Control	855.322	1690.11	1272.71	-0.982276	0.101867	-9.64273	5.27632e-22	2.32376e-20	Normal	N_WCS417_30m-N_Control	RNC	--	--	--
BnaA08G0215300ZS	N_WCS417_30m	N_Control	324.693	52.6632	188.678	2.62207	0.272032	9.63882	5.48126e-22	2.41175e-20	Up	N_WCS417_30m-N_Control	RNC	AT1G02250	NAC005	NAC domain containing protein 5
BnaC09G0528700ZS	N_WCS417_30m	N_Control	265.514	26.968	146.241	3.30741	0.343223	9.63633	5.61613e-22	2.46878e-20	Up	N_WCS417_30m-N_Control	RNC	AT5G13220	TIFY9	Encodes JAZ10, a member of the JASMONATE ZIM-domain (JAZ) proteins acting as repressors of jasmonate (JA) signaling. An alternatively spliced form (JAZ10.4) of JAZ10 lacks the Jas domain.
BnaA03G0342200ZS	N_WCS417_30m	N_Control	463.663	112.785	288.224	2.03833	0.21159	9.63338	5.7797e-22	2.5383e-20	Up	N_WCS417_30m-N_Control	RNC	AT3G15630	--	--
BnaA09G0305700ZS	N_WCS417_30m	N_Control	1833.05	3478.39	2655.72	-0.924035	0.0959626	-9.62911	6.02467e-22	2.6434e-20	Normal	N_WCS417_30m-N_Control	RNC	AT2G01021	--	--
BnaC04G0486900ZS	N_WCS417_30m	N_Control	1487.11	2730.02	2108.57	-0.876927	0.0910717	-9.62897	6.03323e-22	2.64468e-20	Normal	N_WCS417_30m-N_Control	RNC	AT2G28720	HTB3	Histone superfamily protein
BnaA01G0070700ZS	N_WCS417_30m	N_Control	877.013	338.951	607.982	1.3713	0.142534	9.62089	6.52622e-22	2.85811e-20	Up	N_WCS417_30m-N_Control	RNC	AT4G30270	XTH24	encodes a protein similar to endo xyloglucan transferase in sequence. It is also very similar to BRU1 in soybean, which is involved in brassinosteroid response.
Bnascaffold0027G0010500ZS	N_WCS417_30m	N_Control	918.01	1769.25	1343.63	-0.946565	0.0983899	-9.62055	6.54812e-22	2.86501e-20	Normal	N_WCS417_30m-N_Control	RNC	--	--	--
BnaA05G0194300ZS	N_WCS417_30m	N_Control	1178.83	2158.41	1668.62	-0.872816	0.0907254	-9.62041	6.5569e-22	2.86618e-20	Normal	N_WCS417_30m-N_Control	RNC	--	--	--
BnaC03G0594100ZS	N_WCS417_30m	N_Control	1009.36	1921.21	1465.28	-0.928548	0.0966089	-9.61141	7.15602e-22	3.12515e-20	Normal	N_WCS417_30m-N_Control	RNC	AT3G43800	GSTU27	Encodes glutathione transferase belonging to the tau class of GSTs. Naming convention according to Wagner et al. (2002).
Bnascaffold0027G0030500ZS	N_WCS417_30m	N_Control	1278.64	2320.39	1799.52	-0.86007	0.0894947	-9.61028	7.23502e-22	3.15671e-20	Normal	N_WCS417_30m-N_Control	RNC	--	--	--
BnaC07G0128500ZS	N_WCS417_30m	N_Control	1374.6	647.188	1010.89	1.08648	0.11315	9.60208	7.83472e-22	3.41518e-20	Up	N_WCS417_30m-N_Control	RNC	AT1G30720	AtBBE10	FAD-binding Berberine family protein
Bnascaffold0027G0057800ZS	N_WCS417_30m	N_Control	1221.43	2217.97	1719.7	-0.860474	0.0896614	-9.59693	8.2363e-22	3.58689e-20	Normal	N_WCS417_30m-N_Control	RNC	--	--	--
BnaA02G0200800ZS	N_WCS417_30m	N_Control	363.609	909.757	636.683	-1.32291	0.13787	-9.59538	8.36094e-22	3.63779e-20	Down	N_WCS417_30m-N_Control	RNC	AT1G72520	LOX4	PLAT/LH2 domain-containing lipoxygenase family protein
Bnascaffold0148G0000100ZS	N_WCS417_30m	N_Control	1135	2095.21	1615.11	-0.884143	0.092229	-9.58639	9.12248e-22	3.96544e-20	Normal	N_WCS417_30m-N_Control	RNC	--	--	--
Bnascaffold0044G0000700ZS	N_WCS417_30m	N_Control	2009.52	3698.2	2853.86	-0.879583	0.0917649	-9.58517	9.2302e-22	4.00833e-20	Normal	N_WCS417_30m-N_Control	RNC	--	--	--
Bnascaffold0036G0000700ZS	N_WCS417_30m	N_Control	1009.19	2021.23	1515.21	-1.00213	0.104551	-9.58508	9.23828e-22	4.00833e-20	Down	N_WCS417_30m-N_Control	RNC	--	--	--
BnaA10G0298400ZS	N_WCS417_30m	N_Control	611.978	180.756	396.367	1.76126	0.183773	9.5839	9.34454e-22	4.05068e-20	Up	N_WCS417_30m-N_Control	RNC	AT5G02230	--	Haloacid dehalogenase-like hydrolase (HAD) superfamily protein
Bnascaffold0551G0000700ZS	N_WCS417_30m	N_Control	1088.03	2089.53	1588.78	-0.941839	0.0983023	-9.58106	9.60579e-22	4.16008e-20	Normal	N_WCS417_30m-N_Control	RNC	--	--	--
BnaA04G0072900ZS	N_WCS417_30m	N_Control	1944.77	1034.05	1489.41	0.911166	0.0951118	9.57995	9.70958e-22	4.20114e-20	Normal	N_WCS417_30m-N_Control	RNC	AT4G13930	SHM4	Encodes a serine hydroxymethyltransferase maximally expressed in root
Bnascaffold0027G0026800ZS	N_WCS417_30m	N_Control	1493.54	2742.34	2117.94	-0.876207	0.0914772	-9.57842	9.85366e-22	4.25955e-20	Normal	N_WCS417_30m-N_Control	RNC	--	--	--
Bnascaffold0175G0000400ZS	N_WCS417_30m	N_Control	1646.05	2833.78	2239.92	-0.783482	0.0818295	-9.57457	1.02286e-21	4.41756e-20	Normal	N_WCS417_30m-N_Control	RNC	--	--	--
BnaA02G0015100ZS	N_WCS417_30m	N_Control	37.8289	271.243	154.536	-2.84041	0.297007	-9.56345	1.13894e-21	4.91436e-20	Down	N_WCS417_30m-N_Control	RNC	AT5G04120	--	Encodes a cofactor-dependent phosphoglycerate mutase (dPGM) - like protein with phosphoserine phosphatase activity that may be responsible for serine anabolism.
Bnascaffold2363G0000300ZS	N_WCS417_30m	N_Control	1461.29	2783.73	2122.51	-0.929172	0.097217	-9.55771	1.20392e-21	5.18993e-20	Normal	N_WCS417_30m-N_Control	RNC	--	--	--
BnaC08G0104600ZS	N_WCS417_30m	N_Control	158.377	591.453	374.915	-1.8992	0.198829	-9.55192	1.27314e-21	5.48329e-20	Down	N_WCS417_30m-N_Control	RNC	AT1G32640	ZBF1	Encodes a MYC-related transcriptional activator with a typical DNA binding domain of a basic helix-loop-helix leucine zipper motif. Binds to an extended G-Box promoter motif and interacts with Jasmonate ZIM-domain proteins. Its transcription is induced by dehydration stress and ABA treatment. Negative regulator of blue light鈥搈ediated photomorphogenic growth and blue and far-red-light鈥搑egulated ge…
BnaA03G0439400ZS	N_WCS417_30m	N_Control	453.289	110.389	281.839	2.03893	0.213478	9.55101	1.28441e-21	5.52675e-20	Up	N_WCS417_30m-N_Control	RNC	AT4G17215	--	Pollen Ole e 1 allergen and extensin family protein
BnaA03G0594300ZS	N_WCS417_30m	N_Control	1439.23	2587.51	2013.37	-0.845949	0.0885776	-9.55036	1.29242e-21	5.55612e-20	Normal	N_WCS417_30m-N_Control	RNC	--	--	--
BnaA01G0022100ZS	N_WCS417_30m	N_Control	74.4835	367.868	221.176	-2.30306	0.241221	-9.54751	1.32854e-21	5.70615e-20	Down	N_WCS417_30m-N_Control	RNC	AT4G36550	PUB5	ARM repeat superfamily protein
BnaA09G0293200ZS	N_WCS417_30m	N_Control	679.523	1419.37	1049.45	-1.06277	0.111375	-9.54229	1.39707e-21	5.99498e-20	Down	N_WCS417_30m-N_Control	RNC	--	--	--
BnaA01G0070600ZS	N_WCS417_30m	N_Control	1592.07	779.788	1185.93	1.03013	0.107985	9.53955	1.43447e-21	6.14984e-20	Up	N_WCS417_30m-N_Control	RNC	AT4G30280	XTH18	Encodes a xyloglucan endotransglucosylase/hydrolase with only only the endotransglucosylase (XET; EC 2.4.1.207) activity towards xyloglucan and non-detectable endohydrolytic (XEH; EC 3.2.1.151) activity. Expressed in the mature or basal regions of both the main and lateral roots, but not in the tip of these roots where cell division occurs.
BnaC06G0204000ZS	N_WCS417_30m	N_Control	927.915	1842.11	1385.01	-0.989641	0.103748	-9.53891	1.44344e-21	6.18264e-20	Normal	N_WCS417_30m-N_Control	RNC	AT3G57150	TRUB1	Encodes a putative pseudouridine synthase (NAP57).
BnaA05G0222300ZS	N_WCS417_30m	N_Control	907.811	1949.49	1428.65	-1.10342	0.115737	-9.53383	1.51579e-21	6.48658e-20	Down	N_WCS417_30m-N_Control	RNC	--	--	--
BnaC08G0176700ZS	N_WCS417_30m	N_Control	406.579	86.0799	246.33	2.24177	0.235212	9.53083	1.56025e-21	6.67075e-20	Up	N_WCS417_30m-N_Control	RNC	AT4G28240	WIP1	Wound-responsive family protein
Bnascaffold0025G0017400ZS	N_WCS417_30m	N_Control	1487.37	2666.57	2076.97	-0.842004	0.0884082	-9.52405	1.66566e-21	7.11493e-20	Normal	N_WCS417_30m-N_Control	RNC	--	--	--
BnaA10G0231200ZS	N_WCS417_30m	N_Control	515.912	142.447	329.179	1.85628	0.19494	9.52228	1.69422e-21	7.23033e-20	Up	N_WCS417_30m-N_Control	RNC	AT5G12010	--	--
BnaC08G0083800ZS	N_WCS417_30m	N_Control	2578.58	1471.6	2025.09	0.809378	0.0850057	9.52146	1.70759e-21	7.28072e-20	Normal	N_WCS417_30m-N_Control	RNC	AT4G31500	SUR2	Encodes an oxime-metabolizing enzyme in the biosynthetic pathway of glucosinolates. Is required for phytochrome signal transduction in red light. Mutation confers auxin overproduction.
BnaA05G0238300ZS	N_WCS417_30m	N_Control	2187.47	3813.56	3000.52	-0.801442	0.0842016	-9.51814	1.76304e-21	7.51033e-20	Normal	N_WCS417_30m-N_Control	RNC	--	--	--
Bnascaffold0084G0000500ZS	N_WCS417_30m	N_Control	1580.84	2833.72	2207.28	-0.841705	0.0884854	-9.51236	1.86387e-21	7.93262e-20	Normal	N_WCS417_30m-N_Control	RNC	--	--	--
BnaA01G0111000ZS	N_WCS417_30m	N_Control	2976.79	1771.4	2374.09	0.74885	0.0787641	9.5075	1.95308e-21	8.30474e-20	Normal	N_WCS417_30m-N_Control	RNC	AT4G20830	OGOX1	FAD-binding Berberine family protein
Bnascaffold0027G0044600ZS	N_WCS417_30m	N_Control	2360.14	4063.8	3211.97	-0.784049	0.0825363	-9.49943	2.11033e-21	8.96525e-20	Normal	N_WCS417_30m-N_Control	RNC	--	--	--
Bnascaffold0135G0000200ZS	N_WCS417_30m	N_Control	1408.21	2505.47	1956.84	-0.831012	0.0874926	-9.49808	2.13799e-21	9.07454e-20	Normal	N_WCS417_30m-N_Control	RNC	--	--	--
Bnascaffold1635G0000800ZS	N_WCS417_30m	N_Control	1062.12	1970.05	1516.08	-0.891465	0.0938819	-9.49559	2.1896e-21	9.27755e-20	Normal	N_WCS417_30m-N_Control	RNC	--	--	--
BnaA05G0272600ZS	N_WCS417_30m	N_Control	789.154	1588.2	1188.68	-1.00866	0.106225	-9.49559	2.18978e-21	9.27755e-20	Down	N_WCS417_30m-N_Control	RNC	--	--	--
Bnascaffold0027G0060700ZS	N_WCS417_30m	N_Control	1293.58	2344.9	1819.24	-0.857966	0.0903582	-9.49517	2.19856e-21	9.30631e-20	Normal	N_WCS417_30m-N_Control	RNC	--	--	--
Bnascaffold2363G0000100ZS	N_WCS417_30m	N_Control	1118.02	2148.8	1633.41	-0.942005	0.099213	-9.49478	2.20684e-21	9.33291e-20	Normal	N_WCS417_30m-N_Control	RNC	--	--	--
BnaA06G0231100ZS	N_WCS417_30m	N_Control	1312.13	2337.64	1824.88	-0.833361	0.0877994	-9.49164	2.27423e-21	9.60925e-20	Normal	N_WCS417_30m-N_Control	RNC	--	--	--
BnaC03G0207800ZS	N_WCS417_30m	N_Control	1329.53	609.1	969.316	1.12614	0.118667	9.48997	2.311e-21	9.75578e-20	Up	N_WCS417_30m-N_Control	RNC	AT2G37110	--	PLAC8 family protein
BnaC04G0568100ZS	N_WCS417_30m	N_Control	658.493	200.748	429.621	1.71161	0.180406	9.48754	2.36546e-21	9.9767e-20	Up	N_WCS417_30m-N_Control	RNC	AT2G39518	CASPL4D2	Uncharacterised protein family (UPF0497)
BnaA05G0269200ZS	N_WCS417_30m	N_Control	935.81	2097.04	1516.42	-1.16387	0.12278	-9.4793	2.55985e-21	1.07869e-19	Down	N_WCS417_30m-N_Control	RNC	--	--	--
Bnascaffold0094G0000200ZS	N_WCS417_30m	N_Control	2169.71	3674.94	2922.33	-0.760079	0.080225	-9.47434	2.68443e-21	1.13017e-19	Normal	N_WCS417_30m-N_Control	RNC	--	--	--
BnaA08G0137800ZS	N_WCS417_30m	N_Control	3867.07	2365.44	3116.26	0.708835	0.0748198	9.47389	2.69611e-21	1.13406e-19	Normal	N_WCS417_30m-N_Control	RNC	AT4G05320	UBQ10	One of five polyubiquitin genes in A. thaliana. These genes encode the highly conserved 76-amino acid protein ubiquitin that is covalently attached to substrate proteins targeting most for degradation. Polyubiquitin genes are characterized by the presence of tandem repeats of the 228 bp that encode a ubiquitin monomer. Induced by salicylic acid. Independent of NPR1 for their induction by salicyli…
BnaC03G0584500ZS	N_WCS417_30m	N_Control	4118.06	7040.42	5579.24	-0.773574	0.0816763	-9.47121	2.76608e-21	1.16245e-19	Normal	N_WCS417_30m-N_Control	RNC	--	--	--
Bnascaffold3138G0000100ZS	N_WCS417_30m	N_Control	881.784	1711.44	1296.61	-0.956979	0.10106	-9.46945	2.81325e-21	1.18121e-19	Normal	N_WCS417_30m-N_Control	RNC	--	--	--
Bnascaffold2009G0000100ZS	N_WCS417_30m	N_Control	1257.9	2313.05	1785.48	-0.878484	0.0927916	-9.46727	2.87241e-21	1.20497e-19	Normal	N_WCS417_30m-N_Control	RNC	--	--	--
BnaA06G0356700ZS	N_WCS417_30m	N_Control	840.249	294.237	567.243	1.51249	0.159795	9.46517	2.93091e-21	1.22841e-19	Up	N_WCS417_30m-N_Control	RNC	AT5G49450	bZIP1	Encodes a transcription activator is a positive regulator of plant tolerance to salt, osmotic and drought stresses.
BnaC03G0207900ZS	N_WCS417_30m	N_Control	1357.67	625.673	991.671	1.11832	0.118186	9.4624	3.00965e-21	1.26028e-19	Up	N_WCS417_30m-N_Control	RNC	AT2G37110	--	PLAC8 family protein
BnaA07G0183300ZS	N_WCS417_30m	N_Control	332.211	59.0266	195.619	2.49203	0.263374	9.46197	3.02192e-21	1.26429e-19	Up	N_WCS417_30m-N_Control	RNC	AT3G53260	PAL2	Encodes phenylalanine lyase. Arabidopsis has four PALs: AT2G37040 (PAL1), AT3G53260 (PAL2), AT5G04230 (PAL3) and AT3G10340 (PAL4).
BnaC05G0465400ZS	N_WCS417_30m	N_Control	1009.4	422.244	715.822	1.25711	0.132866	9.46155	3.03416e-21	1.26828e-19	Up	N_WCS417_30m-N_Control	RNC	AT3G13790	CWI1	Encodes a protein with invertase activity.
BnaA05G0272800ZS	N_WCS417_30m	N_Control	896.11	1760.27	1328.19	-0.974455	0.103037	-9.45736	3.15807e-21	1.3189e-19	Normal	N_WCS417_30m-N_Control	RNC	--	--	--
BnaC07G0002200ZS	N_WCS417_30m	N_Control	1943.87	3275.14	2609.5	-0.752433	0.0795777	-9.45532	3.22032e-21	1.34369e-19	Normal	N_WCS417_30m-N_Control	RNC	--	--	--
BnaC07G0190900ZS	N_WCS417_30m	N_Control	238.683	690.708	464.695	-1.53361	0.162249	-9.45219	3.31829e-21	1.38334e-19	Down	N_WCS417_30m-N_Control	RNC	AT1G21100	IGMT1	O-methyltransferase family protein
BnaC06G0428900ZS	N_WCS417_30m	N_Control	72676.9	52400.1	62538.5	0.471969	0.0499563	9.44763	3.46586e-21	1.44358e-19	Normal	N_WCS417_30m-N_Control	RNC	AT1G21310	RSH	Encodes extensin 3.
Bnascaffold0160G0000200ZS	N_WCS417_30m	N_Control	1423.3	2559.23	1991.26	-0.846483	0.0896311	-9.44407	3.58572e-21	1.49217e-19	Normal	N_WCS417_30m-N_Control	RNC	--	--	--
BnaA05G0210200ZS	N_WCS417_30m	N_Control	605.289	1476.72	1041	-1.28731	0.136347	-9.44148	3.6756e-21	1.52822e-19	Down	N_WCS417_30m-N_Control	RNC	--	--	--
BnaA05G0282800ZS	N_WCS417_30m	N_Control	1298.89	2465.36	1882.13	-0.92512	0.0980327	-9.43685	3.84161e-21	1.59582e-19	Normal	N_WCS417_30m-N_Control	RNC	--	--	--
BnaA08G0244400ZS	N_WCS417_30m	N_Control	469.564	121.381	295.473	1.95097	0.206926	9.42835	4.16599e-21	1.72903e-19	Up	N_WCS417_30m-N_Control	RNC	AT1G21130	IGMT4	O-methyltransferase family protein
BnaA05G0300800ZS	N_WCS417_30m	N_Control	961.406	1852.01	1406.71	-0.945511	0.100342	-9.42288	4.38891e-21	1.81994e-19	Normal	N_WCS417_30m-N_Control	RNC	--	--	--
Bnascaffold0046G0000400ZS	N_WCS417_30m	N_Control	1589.8	2802.28	2196.04	-0.817513	0.0867743	-9.42114	4.46237e-21	1.84877e-19	Normal	N_WCS417_30m-N_Control	RNC	--	--	--
BnaA09G0687600ZS	N_WCS417_30m	N_Control	429.742	1009.78	719.761	-1.23282	0.130877	-9.41967	4.52513e-21	1.87311e-19	Down	N_WCS417_30m-N_Control	RNC	AT1G03475	LIN2	Encodes coproporphyrinogen III oxidase, a key enzyme in the biosynthetic pathway of chlorophyll and heme, a tetrapyrrole pathway. Mutants express cytological and molecular markers associated with the defense responses, usually activated by pathogen infection.
BnaA09G0309600ZS	N_WCS417_30m	N_Control	946.423	1814.94	1380.68	-0.939765	0.099822	-9.41441	4.75724e-21	1.96745e-19	Normal	N_WCS417_30m-N_Control	RNC	--	--	--
Bnascaffold0038G0001000ZS	N_WCS417_30m	N_Control	1101.43	2055.95	1578.69	-0.900203	0.0956516	-9.41127	4.90177e-21	2.02543e-19	Normal	N_WCS417_30m-N_Control	RNC	--	--	--
BnaA10G0036400ZS	N_WCS417_30m	N_Control	1534.78	766.592	1150.69	1.00148	0.106535	9.40056	5.4276e-21	2.24073e-19	Up	N_WCS417_30m-N_Control	RNC	AT2G32210	AthCYSTM6	--
BnaA02G0119800ZS	N_WCS417_30m	N_Control	720.28	1481.95	1101.12	-1.04057	0.110716	-9.39858	5.53019e-21	2.28107e-19	Down	N_WCS417_30m-N_Control	RNC	AT5G57120	--	--
Bnascaffold0556G0000400ZS	N_WCS417_30m	N_Control	855.467	1653.05	1254.26	-0.95046	0.101172	-9.39453	5.74742e-21	2.36858e-19	Normal	N_WCS417_30m-N_Control	RNC	--	--	--
BnaA07G0287800ZS	N_WCS417_30m	N_Control	660.32	1419.12	1039.72	-1.10443	0.1177	-9.38342	6.38646e-21	2.62963e-19	Down	N_WCS417_30m-N_Control	RNC	AT1G66500	--	Pre-mRNA cleavage complex II
BnaA07G0198200ZS	N_WCS417_30m	N_Control	917.539	1749.23	1333.38	-0.931088	0.0992698	-9.37937	6.63654e-21	2.7302e-19	Normal	N_WCS417_30m-N_Control	RNC	AT3G57150	TRUB1	Encodes a putative pseudouridine synthase (NAP57).
BnaC08G0487800ZS	N_WCS417_30m	N_Control	1516.18	747.893	1132.04	1.01987	0.108751	9.37801	6.72271e-21	2.76322e-19	Up	N_WCS417_30m-N_Control	RNC	AT1G14870	PCR2	PCR2 encodes a membrane protein involved in zinc transport and detoxification.
BnaC05G0339400ZS	N_WCS417_30m	N_Control	1135.12	2087.03	1611.07	-0.878623	0.0937077	-9.37622	6.83824e-21	2.80824e-19	Normal	N_WCS417_30m-N_Control	RNC	AT1G32450	NRT1.5	Transmembrane nitrate transporter. Involved in xylem transport of nitrate from root to shoot. Induced in response to nitrate. Not involved in nitrate uptake. expressed in root pericycle cells.
BnaA09G0364200ZS	N_WCS417_30m	N_Control	1219.25	2400.05	1809.65	-0.977615	0.104378	-9.3661	7.526e-21	3.08797e-19	Normal	N_WCS417_30m-N_Control	RNC	--	--	--
BnaA05G0207700ZS	N_WCS417_30m	N_Control	2174.63	3651.54	2913.08	-0.748026	0.0799271	-9.35885	8.06099e-21	3.30458e-19	Normal	N_WCS417_30m-N_Control	RNC	AT2G01021	--	--
BnaC08G0169600ZS	N_WCS417_30m	N_Control	808.859	1615.81	1212.34	-0.998703	0.10672	-9.35818	8.11199e-21	3.32258e-19	Normal	N_WCS417_30m-N_Control	RNC	AT4G26630	DEK3	DEK domain-containing chromatin associated protein
BnaA05G0240200ZS	N_WCS417_30m	N_Control	827.361	1695.98	1261.67	-1.03622	0.11073	-9.35807	8.12063e-21	3.32321e-19	Down	N_WCS417_30m-N_Control	RNC	--	--	--
Bnascaffold0026G0067100ZS	N_WCS417_30m	N_Control	781.354	1559.92	1170.64	-0.997489	0.106643	-9.35352	8.47811e-21	3.46648e-19	Normal	N_WCS417_30m-N_Control	RNC	--	--	--
Bnascaffold0038G0000700ZS	N_WCS417_30m	N_Control	1060.62	2024.41	1542.51	-0.932037	0.0996538	-9.35275	8.54015e-21	3.48879e-19	Normal	N_WCS417_30m-N_Control	RNC	--	--	--
BnaA03G0101200ZS	N_WCS417_30m	N_Control	407.087	91.974	249.53	2.14556	0.229491	9.34925	8.82745e-21	3.60302e-19	Up	N_WCS417_30m-N_Control	RNC	AT5G59780	MYB59	Encodes a putative transcription factor (MYB59).
BnaA07G0135600ZS	N_WCS417_30m	N_Control	217.564	18.2441	117.904	3.57941	0.383245	9.33974	9.65668e-21	3.93804e-19	Up	N_WCS417_30m-N_Control	RNC	AT1G20070	--	--
BnaC07G0530600ZS	N_WCS417_30m	N_Control	665.003	1375.26	1020.13	-1.04862	0.112335	-9.33482	1.01165e-20	4.12196e-19	Down	N_WCS417_30m-N_Control	RNC	AT4G36220	FAH1	encodes ferulate 5-hydroxylase (F5H). Involved in lignin biosynthesis.
BnaA06G0232300ZS	N_WCS417_30m	N_Control	711.683	1434.31	1073	-1.01094	0.108306	-9.33406	1.0189e-20	4.14791e-19	Down	N_WCS417_30m-N_Control	RNC	--	--	--
BnaC01G0010600ZS	N_WCS417_30m	N_Control	3260.71	1961.54	2611.13	0.733048	0.0785785	9.32886	1.07014e-20	4.35272e-19	Normal	N_WCS417_30m-N_Control	RNC	AT4G39980	DHS1	Encodes a 2-deoxy-D-arabino-heptulosonate 7-phosphate (DAHP) synthase, which catalyzes the first committed step in aromatic amino acid biosynthesis. Gene expression is induced by wounding and pathogenic bacteria Pseudomonas syringae.
BnaA09G0361000ZS	N_WCS417_30m	N_Control	1548.12	2719.6	2133.86	-0.812551	0.0871297	-9.32577	1.10181e-20	4.47762e-19	Normal	N_WCS417_30m-N_Control	RNC	--	--	--
Bnascaffold2061G0000400ZS	N_WCS417_30m	N_Control	988.622	1863.7	1426.16	-0.914354	0.098091	-9.32149	1.14721e-20	4.6581e-19	Normal	N_WCS417_30m-N_Control	RNC	--	--	--
Bnascaffold0046G0001000ZS	N_WCS417_30m	N_Control	1288.54	2277.89	1783.22	-0.821761	0.0881626	-9.32097	1.15281e-20	4.67677e-19	Normal	N_WCS417_30m-N_Control	RNC	--	--	--
Bnascaffold0038G0000400ZS	N_WCS417_30m	N_Control	953.403	1787.41	1370.41	-0.906677	0.0973112	-9.31729	1.19345e-20	4.83745e-19	Normal	N_WCS417_30m-N_Control	RNC	--	--	--
BnaA05G0192000ZS	N_WCS417_30m	N_Control	916.871	1762.4	1339.64	-0.94237	0.101157	-9.3159	1.20928e-20	4.89736e-19	Normal	N_WCS417_30m-N_Control	RNC	--	--	--
Bnascaffold2044G0000200ZS	N_WCS417_30m	N_Control	1437.68	2625.52	2031.6	-0.868933	0.0932795	-9.31537	1.21526e-20	4.91736e-19	Normal	N_WCS417_30m-N_Control	RNC	--	--	--
BnaC03G0028700ZS	N_WCS417_30m	N_Control	2194.06	3549.04	2871.55	-0.693699	0.0744891	-9.31276	1.24553e-20	5.03547e-19	Normal	N_WCS417_30m-N_Control	RNC	AT5G06320	NHL3	encodes a protein whose sequence is similar to tobacco hairpin-induced gene (HIN1) and Arabidopsis non-race specific disease resistance gene (NDR1). Expression of this gene is induced by cucumber mosaic virus, spermine and Pseudomonas syringae pv. tomato DC3000. The gene product is localized to the plasma membrane.
BnaA02G0088900ZS	N_WCS417_30m	N_Control	637.438	196.959	417.198	1.69297	0.181946	9.3048	1.3425e-20	5.42283e-19	Up	N_WCS417_30m-N_Control	RNC	AT5G21940	--	--
Bnascaffold3021G0000200ZS	N_WCS417_30m	N_Control	807.358	1587.85	1197.6	-0.976024	0.104924	-9.30218	1.37592e-20	5.55303e-19	Normal	N_WCS417_30m-N_Control	RNC	--	--	--
BnaA06G0171200ZS	N_WCS417_30m	N_Control	480.701	124.203	302.452	1.95136	0.20985	9.2988	1.4204e-20	5.72761e-19	Up	N_WCS417_30m-N_Control	RNC	AT3G47960	NPF2.10	Encodes a high-affinity, proton-dependent glucosinolate-specific transporter that is crucial for the transport of both methionine- and tryptophan-derived glucosinolates to seeds.
BnaC01G0478400ZS	N_WCS417_30m	N_Control	6064.57	4048.53	5056.55	0.582843	0.0627353	9.29051	1.53551e-20	6.18643e-19	Normal	N_WCS417_30m-N_Control	RNC	AT3G10300	--	Calcium-binding EF-hand family protein
BnaC02G0425900ZS	N_WCS417_30m	N_Control	526.822	142.711	334.766	1.88683	0.203293	9.28132	1.67398e-20	6.73853e-19	Up	N_WCS417_30m-N_Control	RNC	AT2G01450	MPK17	member of MAP Kinase
BnaA10G0047900ZS	N_WCS417_30m	N_Control	2182.91	3622.14	2902.52	-0.730237	0.0787474	-9.27316	1.80714e-20	7.2683e-19	Normal	N_WCS417_30m-N_Control	RNC	--	--	--
BnaC05G0048800ZS	N_WCS417_30m	N_Control	2851.6	4483.71	3667.66	-0.652673	0.0703967	-9.27135	1.83811e-20	7.38651e-19	Normal	N_WCS417_30m-N_Control	RNC	--	--	--
BnaC03G0413000ZS	N_WCS417_30m	N_Control	1317.38	631.567	974.475	1.06098	0.114459	9.26954	1.86944e-20	7.50596e-19	Up	N_WCS417_30m-N_Control	RNC	AT3G15630	--	--
BnaC03G0236200ZS	N_WCS417_30m	N_Control	1507.24	744.196	1125.72	1.01869	0.109912	9.26817	1.89369e-20	7.59683e-19	Up	N_WCS417_30m-N_Control	RNC	AT2G40890	REF8	encodes coumarate 3-hydroxylase (C3H), a P450-dependent monooxygenase. Involved in lignin biosynthesis and flavonoid biosynthesis. Also affects the biosynthesis of coumarins such as scopoletin and scopolin as a branching-out-pathway from the phenylpropanoid acid level.
BnaC02G0211600ZS	N_WCS417_30m	N_Control	1024.89	1930.81	1477.85	-0.913284	0.0985608	-9.26619	1.92905e-20	7.73206e-19	Normal	N_WCS417_30m-N_Control	RNC	AT1G67250	UMP1a	Proteasome maturation factor UMP1
BnaC07G0212800ZS	N_WCS417_30m	N_Control	343.919	870.005	606.962	-1.3393	0.144539	-9.26598	1.93301e-20	7.7413e-19	Down	N_WCS417_30m-N_Control	RNC	AT5G66650	MCU6	Protein of unknown function (DUF607)
Bnascaffold1478G0000300ZS	N_WCS417_30m	N_Control	1455.34	2591.5	2023.42	-0.832126	0.0898076	-9.26565	1.9389e-20	7.75825e-19	Normal	N_WCS417_30m-N_Control	RNC	--	--	--
BnaC05G0214600ZS	N_WCS417_30m	N_Control	461.322	1081.53	771.424	-1.22992	0.132848	-9.25805	2.082e-20	8.32372e-19	Down	N_WCS417_30m-N_Control	RNC	AT1G27100	--	Actin cross-linking protein
BnaA06G0410700ZS	N_WCS417_30m	N_Control	832.094	309.517	570.805	1.42826	0.154295	9.25671	2.1082e-20	8.42128e-19	Up	N_WCS417_30m-N_Control	RNC	AT2G01450	MPK17	member of MAP Kinase
BnaA06G0249600ZS	N_WCS417_30m	N_Control	1471.7	2559.05	2015.37	-0.798021	0.0862798	-9.24922	2.2613e-20	9.02515e-19	Normal	N_WCS417_30m-N_Control	RNC	--	--	--
BnaA05G0273900ZS	N_WCS417_30m	N_Control	1088.87	2022.24	1555.56	-0.893543	0.0966544	-9.24472	2.35855e-20	9.40527e-19	Normal	N_WCS417_30m-N_Control	RNC	--	--	--
Bnascaffold0027G0058500ZS	N_WCS417_30m	N_Control	897.958	1713.41	1305.68	-0.932109	0.100832	-9.2442	2.37013e-20	9.44342e-19	Normal	N_WCS417_30m-N_Control	RNC	--	--	--
BnaA06G0232600ZS	N_WCS417_30m	N_Control	959.732	2049.3	1504.52	-1.0938	0.118515	-9.22918	2.72713e-20	1.08566e-18	Down	N_WCS417_30m-N_Control	RNC	--	--	--
BnaC08G0260600ZS	N_WCS417_30m	N_Control	753.826	271.763	512.794	1.47325	0.159692	9.22558	2.82023e-20	1.12164e-18	Up	N_WCS417_30m-N_Control	RNC	AT1G20510	OPCL1	OPC-8:0 CoA ligase1
Bnascaffold0601G0000300ZS	N_WCS417_30m	N_Control	1002.64	1866.55	1434.6	-0.896782	0.0972069	-9.22549	2.82267e-20	1.12164e-18	Normal	N_WCS417_30m-N_Control	RNC	--	--	--
BnaC04G0391300ZS	N_WCS417_30m	N_Control	4310.21	2756.73	3533.47	0.644615	0.0698739	9.22541	2.82471e-20	1.12164e-18	Normal	N_WCS417_30m-N_Control	RNC	AT1G11440	--	--
BnaA06G0202100ZS	N_WCS417_30m	N_Control	5881.24	8509.64	7195.44	-0.533019	0.0578659	-9.21127	3.22284e-20	1.27865e-18	Normal	N_WCS417_30m-N_Control	RNC	--	--	--
BnaC05G0437400ZS	N_WCS417_30m	N_Control	1353.86	2346.05	1849.96	-0.793098	0.0861111	-9.21017	3.25618e-20	1.29078e-18	Normal	N_WCS417_30m-N_Control	RNC	AT3G16400	NSP1	Encodes a nitrile-specifier protein NSP1 responsible for constitutive and herbivore-induced simple nitrile formation in rosette leaves. NSP1 is one out of five (At3g16400/NSP1, At2g33070/NSP2, At3g16390/NSP3, At3g16410/NSP4 and At5g48180/NSP5) A. thaliana epithiospecifier protein (ESP) homologues that promote simple nitrile, but not epithionitrile or thiocyanate formation.
BnaC09G0054400ZS	N_WCS417_30m	N_Control	223.538	644.877	434.207	-1.5281	0.165963	-9.20748	3.33862e-20	1.32234e-18	Down	N_WCS417_30m-N_Control	RNC	AT5G25350	EBF2	Arabidopsis thaliana EIN3-binding F-box protein 2 (EBF2) mRNA. Part of the SCF complex, it is located in the nucleus and is involved in the ethylene-response pathway.
BnaA01G0141700ZS	N_WCS417_30m	N_Control	614.813	1289.26	952.038	-1.06865	0.11609	-9.2054	3.4039e-20	1.34706e-18	Down	N_WCS417_30m-N_Control	RNC	AT4G24570	UCP4	Encodes one of the mitochondrial dicarboxylate carriers (DIC): DIC1 (AT2G22500), DIC2 (AT4G24570), DIC3 (AT5G09470).
BnaA01G0274000ZS	N_WCS417_30m	N_Control	469.383	116.951	293.167	2.00196	0.217598	9.20025	3.57121e-20	1.41208e-18	Up	N_WCS417_30m-N_Control	RNC	AT1G60750	--	NAD(P)-linked oxidoreductase superfamily protein
BnaC04G0086000ZS	N_WCS417_30m	N_Control	646.036	211.79	428.913	1.60772	0.17491	9.19172	3.86622e-20	1.52743e-18	Up	N_WCS417_30m-N_Control	RNC	AT2G37970	SOUL2	SOUL heme-binding family protein
Bnascaffold0027G0042900ZS	N_WCS417_30m	N_Control	2444.35	4205.5	3324.93	-0.78238	0.0852263	-9.18003	4.30956e-20	1.70115e-18	Normal	N_WCS417_30m-N_Control	RNC	--	--	--
BnaA03G0406700ZS	N_WCS417_30m	N_Control	2215.6	1236.56	1726.08	0.840906	0.0916144	9.17876	4.36093e-20	1.71998e-18	Normal	N_WCS417_30m-N_Control	RNC	AT5G61210	SNP33	membrane localized t-SNARE SNAP25 homologue, probably involved in cytokinesis and cell plate formation
BnaA03G0415700ZS	N_WCS417_30m	N_Control	526.192	148.313	337.253	1.82901	0.199302	9.17709	4.42879e-20	1.74527e-18	Up	N_WCS417_30m-N_Control	RNC	AT3G50440	MES10	Encodes a protein shown to have methyl jasmonate esterase activity in vitro. This protein does not act on methyl IAA, MeSA, MeGA4, or MEGA9 in vitro.
Bnascaffold0027G0053900ZS	N_WCS417_30m	N_Control	1529.31	2730.88	2130.09	-0.836611	0.0912571	-9.16763	4.83548e-20	1.90393e-18	Normal	N_WCS417_30m-N_Control	RNC	--	--	--
BnaA03G0079100ZS	N_WCS417_30m	N_Control	386.7	88.6465	237.673	2.12534	0.23184	9.16728	4.85118e-20	1.90851e-18	Up	N_WCS417_30m-N_Control	RNC	AT5G18670	BMY3	putative beta-amylase BMY3 (BMY3)
BnaA01G0025400ZS	N_WCS417_30m	N_Control	582.153	182.597	382.375	1.67177	0.182372	9.16683	4.87114e-20	1.91476e-18	Up	N_WCS417_30m-N_Control	RNC	AT4G36040	J11	Chaperone DnaJ-domain superfamily protein
Bnascaffold0022G0001100ZS	N_WCS417_30m	N_Control	1030.29	1907.77	1469.03	-0.888752	0.0969738	-9.16487	4.96051e-20	1.94825e-18	Normal	N_WCS417_30m-N_Control	RNC	--	--	--
BnaC03G0633000ZS	N_WCS417_30m	N_Control	1278.94	603.042	940.991	1.08471	0.118392	9.16201	5.09401e-20	1.999e-18	Up	N_WCS417_30m-N_Control	RNC	AT1G25220	WEI7	Catalyzes the first step of tryptophan biosynthesis: Chorismate L-Glutamine = Anthranilate Pyruvate L-Glutamate. Functions as a heterocomplex with anthranilate synthase alpha subunit (ASA1 or ASA2).
Bnascaffold0122G0000100ZS	N_WCS417_30m	N_Control	1121.6	2020.18	1570.89	-0.848887	0.0926723	-9.1601	5.18516e-20	2.03307e-18	Normal	N_WCS417_30m-N_Control	RNC	--	--	--
BnaA05G0210400ZS	N_WCS417_30m	N_Control	1844.72	3500.31	2672.51	-0.924683	0.101019	-9.15352	5.51096e-20	2.15901e-18	Normal	N_WCS417_30m-N_Control	RNC	--	--	--
BnaC02G0014900ZS	N_WCS417_30m	N_Control	4.35713	164.815	84.5861	-5.25383	0.574673	-9.14228	6.11488e-20	2.3936e-18	Down	N_WCS417_30m-N_Control	RNC	AT5G04120	--	Encodes a cofactor-dependent phosphoglycerate mutase (dPGM) - like protein with phosphoserine phosphatase activity that may be responsible for serine anabolism.
BnaC07G0130800ZS	N_WCS417_30m	N_Control	178.923	573.046	375.984	-1.67824	0.183825	-9.12959	6.8759e-20	2.68924e-18	Down	N_WCS417_30m-N_Control	RNC	AT1G30370	DLAH	Encodes a mitochondria-localized class III phospholipase A1 that plays a role in seed viability.
BnaA07G0181600ZS	N_WCS417_30m	N_Control	437.847	108.021	272.934	2.0168	0.220948	9.12796	6.98039e-20	2.72783e-18	Up	N_WCS417_30m-N_Control	RNC	AT3G52870	--	IQ calmodulin-binding motif family protein
Bnascaffold3035G0000100ZS	N_WCS417_30m	N_Control	1634.09	2871.2	2252.65	-0.812927	0.0890648	-9.12737	7.01841e-20	2.7404e-18	Normal	N_WCS417_30m-N_Control	RNC	--	--	--
BnaA03G0127100ZS	N_WCS417_30m	N_Control	4078.85	2494.32	3286.59	0.709067	0.0777488	9.11998	7.51397e-20	2.93145e-18	Normal	N_WCS417_30m-N_Control	RNC	AT5G54160	OMT3	A caffeic acid/5-hydroxyferulic acid O-methyltransferase. Interacts with 14-4-3 proteins in yeast 2 hybrid assay. AtOMT1 (At5g54160) encodes a flavonol 3锟?O-methyltransferase that is highly active towards quercetin and myricetin. The substrate specificity identifies the enzyme as flavonol 3锟?methyltransferase which replaces the former annotation of the gene to encode a caffeic acid/5-hydroxyferul…
BnaA05G0364000ZS	N_WCS417_30m	N_Control	242.271	669.989	456.13	-1.46742	0.161012	-9.11372	7.9608e-20	3.10319e-18	Down	N_WCS417_30m-N_Control	RNC	AT3G19580	ZF2	Encodes zinc finger protein. mRNA levels are upregulated in response to ABA, high salt, and mild dessication. The protein is localized to the nucleus and acts as a transcriptional repressor.
Bnascaffold0556G0000200ZS	N_WCS417_30m	N_Control	755.225	1491.2	1123.21	-0.981135	0.107743	-9.10628	8.52513e-20	3.3204e-18	Normal	N_WCS417_30m-N_Control	RNC	--	--	--
BnaA09G0283800ZS	N_WCS417_30m	N_Control	1657.65	2757.61	2207.63	-0.734217	0.0806728	-9.10117	8.93668e-20	3.4778e-18	Normal	N_WCS417_30m-N_Control	RNC	--	--	--
BnaC06G0378400ZS	N_WCS417_30m	N_Control	563.165	163.293	363.229	1.78367	0.196034	9.09879	9.13437e-20	3.55178e-18	Up	N_WCS417_30m-N_Control	RNC	AT1G71110	--	--
BnaA10G0131000ZS	N_WCS417_30m	N_Control	556.56	170.468	363.514	1.70747	0.187784	9.09277	9.65454e-20	3.75093e-18	Up	N_WCS417_30m-N_Control	RNC	AT5G57220	CYP81F2	member of CYP81F, involved in glucosinolate metabolism. Mutants had impaired resistance to fungi.
BnaC01G0084400ZS	N_WCS417_30m	N_Control	682.205	237.969	460.087	1.52062	0.167274	9.09058	9.85125e-20	3.82418e-18	Up	N_WCS417_30m-N_Control	RNC	AT4G30210	ATR2	Encodes NADPH-cytochrome P450 reductase that catalyzes the first oxidative step of the phenylpropanoid general pathway.
Bnascaffold0051G0000400ZS	N_WCS417_30m	N_Control	858.786	1692.46	1275.62	-0.978648	0.107674	-9.08901	9.99484e-20	3.87671e-18	Normal	N_WCS417_30m-N_Control	RNC	--	--	--
BnaA01G0252300ZS	N_WCS417_30m	N_Control	1324.59	2344	1834.3	-0.823311	0.0906547	-9.08184	1.06754e-19	4.13511e-18	Normal	N_WCS417_30m-N_Control	RNC	--	--	--
BnaC04G0127200ZS	N_WCS417_30m	N_Control	761.808	1497.9	1129.86	-0.97523	0.107383	-9.08181	1.06787e-19	4.13511e-18	Normal	N_WCS417_30m-N_Control	RNC	AT1G55920	SERAT2;1	Encodes a chloroplast/cytosol localized serine O-acetyltransferase involved in sulfur assimilation and cysteine biosynthesis. Expressed in the vascular system.
BnaA09G0278000ZS	N_WCS417_30m	N_Control	603.329	1259.94	931.636	-1.06272	0.117033	-9.08054	1.08038e-19	4.18009e-18	Down	N_WCS417_30m-N_Control	RNC	--	--	--
BnaC05G0287900ZS	N_WCS417_30m	N_Control	442.217	1040.99	741.605	-1.23462	0.135969	-9.08015	1.08424e-19	4.19155e-18	Down	N_WCS417_30m-N_Control	RNC	AT1G32920	--	--
BnaA05G0239500ZS	N_WCS417_30m	N_Control	648.357	1321.81	985.081	-1.02753	0.113208	-9.0765	1.12123e-19	4.33098e-18	Down	N_WCS417_30m-N_Control	RNC	--	--	--
BnaC01G0026000ZS	N_WCS417_30m	N_Control	620.808	1300.36	960.582	-1.06633	0.117507	-9.07459	1.14106e-19	4.40395e-18	Down	N_WCS417_30m-N_Control	RNC	AT4G36520	AUXILIN-LIKE4	Chaperone DnaJ-domain superfamily protein
Bnascaffold0143G0000100ZS	N_WCS417_30m	N_Control	2056.56	3539.18	2797.87	-0.782857	0.086323	-9.06893	1.20188e-19	4.63485e-18	Normal	N_WCS417_30m-N_Control	RNC	--	--	--
BnaA08G0170200ZS	N_WCS417_30m	N_Control	877.42	1692.59	1285.01	-0.948398	0.104609	-9.06613	1.23322e-19	4.75179e-18	Normal	N_WCS417_30m-N_Control	RNC	AT4G26630	DEK3	DEK domain-containing chromatin associated protein
BnaA06G0314600ZS	N_WCS417_30m	N_Control	937.461	396.755	667.108	1.24033	0.136866	9.06234	1.27685e-19	4.91586e-18	Up	N_WCS417_30m-N_Control	RNC	AT2G17840	ERD7	Identified as drought-inducible gene by differential hybridization. Upregulated by high light, drought, cold and salt stress determined by microarray analysis.
BnaA05G0423300ZS	N_WCS417_30m	N_Control	1057.21	455.348	756.28	1.2141	0.134023	9.05883	1.31858e-19	5.07237e-18	Up	N_WCS417_30m-N_Control	RNC	AT3G12740	ALIS1	Physically interacts with ALA3, and is required for the phospholipid translocase activity of ALA3.
BnaC07G0495700ZS	N_WCS417_30m	N_Control	1015.85	447.449	731.651	1.18333	0.130642	9.05778	1.3313e-19	5.1171e-18	Up	N_WCS417_30m-N_Control	RNC	AT4G30280	XTH18	Encodes a xyloglucan endotransglucosylase/hydrolase with only only the endotransglucosylase (XET; EC 2.4.1.207) activity towards xyloglucan and non-detectable endohydrolytic (XEH; EC 3.2.1.151) activity. Expressed in the mature or basal regions of both the main and lateral roots, but not in the tip of these roots where cell division occurs.
BnaA01G0071200ZS	N_WCS417_30m	N_Control	651.387	222.661	437.024	1.5476	0.171012	9.04968	1.43385e-19	5.50673e-18	Up	N_WCS417_30m-N_Control	RNC	AT4G30210	ATR2	Encodes NADPH-cytochrome P450 reductase that catalyzes the first oxidative step of the phenylpropanoid general pathway.
Bnascaffold0026G0009700ZS	N_WCS417_30m	N_Control	1516.77	2628.34	2072.55	-0.792818	0.0876144	-9.04894	1.44365e-19	5.53982e-18	Normal	N_WCS417_30m-N_Control	RNC	--	--	--
BnaC04G0458500ZS	N_WCS417_30m	N_Control	1414.69	687.366	1051.03	1.04049	0.115008	9.04708	1.46838e-19	5.63013e-18	Up	N_WCS417_30m-N_Control	RNC	AT2G24570	WRKY17	member of WRKY Transcription Factor; Group II-d; negative regulator of basal resistance to Pseudomonas syringae.
BnaA09G0528000ZS	N_WCS417_30m	N_Control	1288.02	620.006	954.014	1.05427	0.116561	9.0448	1.4994e-19	5.74433e-18	Up	N_WCS417_30m-N_Control	RNC	AT3G57330	ACA11	Lesion mimic phenotype when mutation in the gene is combined with a mutation in ACA4. Lesion mimic phenotype of double knockout can be suppressed by nutritional supplements that increase anion levels (e.g. 15 mM Nitrate, Chloride, or Phosphate)
BnaA09G0602400ZS	N_WCS417_30m	N_Control	335.401	62.6454	199.023	2.41662	0.267187	9.04468	1.50111e-19	5.74618e-18	Up	N_WCS417_30m-N_Control	RNC	AT2G20950	--	Arabidopsis phospholipase-like protein (PEARLI 4) family
Bnascaffold0027G0037400ZS	N_WCS417_30m	N_Control	913.769	1777.5	1345.63	-0.960223	0.106185	-9.04293	1.52534e-19	5.83418e-18	Normal	N_WCS417_30m-N_Control	RNC	--	--	--
BnaA06G0235100ZS	N_WCS417_30m	N_Control	678.357	1386.88	1032.62	-1.03228	0.114182	-9.04068	1.55699e-19	5.95035e-18	Down	N_WCS417_30m-N_Control	RNC	--	--	--
BnaC06G0051000ZS	N_WCS417_30m	N_Control	1946.38	1074.71	1510.55	0.856798	0.0947786	9.03999	1.56683e-19	5.98308e-18	Normal	N_WCS417_30m-N_Control	RNC	AT1G50740	--	Transmembrane proteins 14C
Bnascaffold1731G0000300ZS	N_WCS417_30m	N_Control	962.873	1814.32	1388.59	-0.914471	0.101177	-9.03829	1.59137e-19	6.07186e-18	Normal	N_WCS417_30m-N_Control	RNC	--	--	--
Bnascaffold0035G0000400ZS	N_WCS417_30m	N_Control	852.103	1615.48	1233.79	-0.92287	0.102119	-9.03717	1.60787e-19	6.12979e-18	Normal	N_WCS417_30m-N_Control	RNC	--	--	--
BnaA09G0290500ZS	N_WCS417_30m	N_Control	705.093	1418.81	1061.95	-1.00906	0.111695	-9.03402	1.65475e-19	6.30342e-18	Down	N_WCS417_30m-N_Control	RNC	--	--	--
BnaC02G0323300ZS	N_WCS417_30m	N_Control	734.368	273.476	503.922	1.42446	0.157825	9.02559	1.78731e-19	6.80283e-18	Up	N_WCS417_30m-N_Control	RNC	AT1G80820	CCR2	Encodes an cinnamoyl CoA reductase isoform. Involved in lignin biosynthesis.
BnaC04G0607200ZS	N_WCS417_30m	N_Control	330.021	881.503	605.762	-1.41624	0.156925	-9.02494	1.79799e-19	6.83793e-18	Down	N_WCS417_30m-N_Control	RNC	AT2G45760	BAP2	encodes a protein that is similar to BONZAI1-binding protein BAP1.
BnaA07G0210300ZS	N_WCS417_30m	N_Control	930.457	353.932	642.194	1.39293	0.154413	9.0208	1.86717e-19	7.09526e-18	Up	N_WCS417_30m-N_Control	RNC	AT3G59970	MTHFR1	methylenetetrahydrofolate reductase MTHFR1 mRNA, complete
Bnascaffold0148G0000400ZS	N_WCS417_30m	N_Control	1030.84	1902.94	1466.89	-0.884153	0.0980272	-9.01946	1.89014e-19	7.1767e-18	Normal	N_WCS417_30m-N_Control	RNC	--	--	--
Bnascaffold0027G0022900ZS	N_WCS417_30m	N_Control	976.058	1812.96	1394.51	-0.893469	0.0990799	-9.01766	1.92145e-19	7.28968e-18	Normal	N_WCS417_30m-N_Control	RNC	--	--	--
BnaA04G0281800ZS	N_WCS417_30m	N_Control	741.436	282.79	512.113	1.39048	0.154246	9.01474	1.97332e-19	7.4804e-18	Up	N_WCS417_30m-N_Control	RNC	AT2G44450	BGLU15	beta glucosidase 15
BnaA02G0186800ZS	N_WCS417_30m	N_Control	877.715	359.3	618.508	1.28844	0.142951	9.01312	2.00268e-19	7.58556e-18	Up	N_WCS417_30m-N_Control	RNC	AT1G70290	TPS8	Encodes an enzyme putatively involved in trehalose biosynthesis. Though the protein has both trehalose-6-phosphate synthase (TPS)-like and trehalose-6-phosphate phosphatase (TPP)-like domains, neither activity has been detected in enzymatic assays nor has the protein been able to complement yeast TPS or TPP mutants.
BnaC08G0493000ZS	N_WCS417_30m	N_Control	367.422	75.1589	221.291	2.28672	0.253885	9.00688	2.11998e-19	8.02334e-18	Up	N_WCS417_30m-N_Control	RNC	AT1G14200	USR1	RING/U-box superfamily protein
Bnascaffold0197G0000100ZS	N_WCS417_30m	N_Control	1187.76	2192.58	1690.17	-0.883867	0.0981691	-9.00351	2.18606e-19	8.26675e-18	Normal	N_WCS417_30m-N_Control	RNC	--	--	--
Bnascaffold2049G0000300ZS	N_WCS417_30m	N_Control	1216.1	2144.7	1680.4	-0.818287	0.0909072	-9.00134	2.22975e-19	8.42518e-18	Normal	N_WCS417_30m-N_Control	RNC	--	--	--
BnaA09G0212200ZS	N_WCS417_30m	N_Control	4330.66	2829.63	3580.15	0.613916	0.0682038	9.00119	2.23286e-19	8.43012e-18	Normal	N_WCS417_30m-N_Control	RNC	AT5G47120	BI1	Encodes BI-1, a homolog of mammalian Bax inhibitor 1. Functions as an attenuator of biotic and abiotic types of cell death. Bax-induced cell death can be downregulated by ectopically expressing AtBI in planta.
BnaA09G0334400ZS	N_WCS417_30m	N_Control	816.434	1600.35	1208.39	-0.971193	0.107908	-9.0002	2.25298e-19	8.49923e-18	Normal	N_WCS417_30m-N_Control	RNC	--	--	--
BnaC01G0500400ZS	N_WCS417_30m	N_Control	1152.84	2054.92	1603.88	-0.833632	0.0926728	-8.99543	2.35305e-19	8.86958e-18	Normal	N_WCS417_30m-N_Control	RNC	AT3G02550	LBD41	LOB domain-containing protein 41
BnaC07G0271300ZS	N_WCS417_30m	N_Control	87.4746	411.067	249.271	-2.23063	0.248085	-8.99141	2.4407e-19	9.19257e-18	Down	N_WCS417_30m-N_Control	RNC	AT2G01180	PAP1	Encodes phosphatidate phosphatase. Up-regulated by genotoxic stress (gamma ray or UV-B) and elicitor treatments with mastoparan and harpin. Expressed in roots and leaves.
BnaA10G0079300ZS	N_WCS417_30m	N_Control	821.661	1637.71	1229.69	-0.995216	0.110693	-8.9908	2.4544e-19	9.23676e-18	Normal	N_WCS417_30m-N_Control	RNC	--	--	--
BnaA07G0009000ZS	N_WCS417_30m	N_Control	1403.3	2394.81	1899.06	-0.77124	0.0858257	-8.98612	2.56115e-19	9.63076e-18	Normal	N_WCS417_30m-N_Control	RNC	AT2G19760	PRF1	first member of the Arabidopsis profilin multigene family, expressed in all organs of Arabidopsis. Binds poly-L-proline. The first intron of PRF1 enhances gene expression in vegetative tissues.
Bnascaffold0090G0000500ZS	N_WCS417_30m	N_Control	1457.52	2643.18	2050.35	-0.858469	0.095552	-8.98431	2.60359e-19	9.78249e-18	Normal	N_WCS417_30m-N_Control	RNC	--	--	--
BnaA08G0139100ZS	N_WCS417_30m	N_Control	643.897	1343.57	993.733	-1.06054	0.118064	-8.98275	2.64088e-19	9.91464e-18	Down	N_WCS417_30m-N_Control	RNC	AT4G33920	APD5	Protein phosphatase 2C family protein
Bnascaffold0027G0059900ZS	N_WCS417_30m	N_Control	90.158	432.682	261.42	-2.26431	0.252152	-8.97992	2.70957e-19	1.01641e-17	Down	N_WCS417_30m-N_Control	RNC	AT3G18710	PUB29	Encodes a protein containing a U-box and an ARM domain. This protein has E3 ubiquitin ligase activity based on in vitro assays.
BnaC04G0567100ZS	N_WCS417_30m	N_Control	1160.13	543.511	851.82	1.09432	0.121864	8.97984	2.71168e-19	1.01641e-17	Up	N_WCS417_30m-N_Control	RNC	AT2G39400	MAGL6	alpha/beta-Hydrolases superfamily protein
BnaA08G0247200ZS	N_WCS417_30m	N_Control	741.914	272.544	507.229	1.44389	0.160827	8.97787	2.76053e-19	1.03389e-17	Up	N_WCS417_30m-N_Control	RNC	AT1G20510	OPCL1	OPC-8:0 CoA ligase1
BnaC08G0264200ZS	N_WCS417_30m	N_Control	539.944	167.012	353.478	1.69311	0.18864	8.97537	2.82409e-19	1.05685e-17	Up	N_WCS417_30m-N_Control	RNC	AT1G21100	IGMT1	O-methyltransferase family protein
BnaA05G0194000ZS	N_WCS417_30m	N_Control	1154.67	2166.66	1660.67	-0.907481	0.10111	-8.97522	2.82793e-19	1.05745e-17	Normal	N_WCS417_30m-N_Control	RNC	--	--	--
BnaC09G0247600ZS	N_WCS417_30m	N_Control	110.16	425.692	267.926	-1.95155	0.217651	-8.96641	3.06337e-19	1.14457e-17	Down	N_WCS417_30m-N_Control	RNC	AT5G47220	ERF2	Encodes a member of the ERF (ethylene response factor) subfamily B-3 of ERF/AP2 transcription factor family (ATERF-2). The protein contains one AP2 domain. Functions as activator of GCC box鈥揹ependent transcription. Positive regulator of JA-responsive defense genes and resistance to F. oxysporum and enhances JA inhibition of root elongation.
Bnascaffold0032G0000100ZS	N_WCS417_30m	N_Control	930.19	1721.78	1325.99	-0.888314	0.0991591	-8.95847	3.29207e-19	1.22904e-17	Normal	N_WCS417_30m-N_Control	RNC	--	--	--
BnaC06G0011700ZS	N_WCS417_30m	N_Control	720.085	1453.3	1086.69	-1.01277	0.11311	-8.95384	3.43336e-19	1.28077e-17	Down	N_WCS417_30m-N_Control	RNC	AT1G44800	UMAMIT18	Encodes Siliques Are Red 1 (SIAR1). Functions as a bidirectional amino acid transporter that is crucial for the amino acid homeostasis of siliques. Member of nodulin MtN21-like transporter family.
BnaA05G0300600ZS	N_WCS417_30m	N_Control	1066.96	1915.63	1491.29	-0.844177	0.0942887	-8.95311	3.45608e-19	1.28821e-17	Normal	N_WCS417_30m-N_Control	RNC	--	--	--
Bnascaffold0042G0000100ZS	N_WCS417_30m	N_Control	915.661	1698.11	1306.88	-0.890936	0.0995585	-8.94888	3.59121e-19	1.33752e-17	Normal	N_WCS417_30m-N_Control	RNC	--	--	--
BnaC09G0144600ZS	N_WCS417_30m	N_Control	161.966	536.408	349.187	-1.72891	0.193204	-8.94863	3.59932e-19	1.33947e-17	Down	N_WCS417_30m-N_Control	RNC	AT1G63840	--	RING/U-box superfamily protein
Bnascaffold0919G0000600ZS	N_WCS417_30m	N_Control	1950.43	3321.87	2636.15	-0.768041	0.0858407	-8.94728	3.6435e-19	1.35484e-17	Normal	N_WCS417_30m-N_Control	RNC	--	--	--
BnaA09G0634800ZS	N_WCS417_30m	N_Control	1317.85	2269.27	1793.56	-0.784048	0.0876653	-8.94366	3.76487e-19	1.39886e-17	Normal	N_WCS417_30m-N_Control	RNC	AT5G03495	--	RNA-binding (RRM/RBD/RNP motifs) family protein
BnaC03G0437800ZS	N_WCS417_30m	N_Control	598.124	1245.33	921.728	-1.05847	0.118389	-8.94064	3.8693e-19	1.43652e-17	Down	N_WCS417_30m-N_Control	RNC	AT3G19580	ZF2	Encodes zinc finger protein. mRNA levels are upregulated in response to ABA, high salt, and mild dessication. The protein is localized to the nucleus and acts as a transcriptional repressor.
Bnascaffold2231G0000200ZS	N_WCS417_30m	N_Control	882.458	1645.73	1264.09	-0.899103	0.100586	-8.93862	3.94045e-19	1.46177e-17	Normal	N_WCS417_30m-N_Control	RNC	--	--	--
BnaA10G0190900ZS	N_WCS417_30m	N_Control	373.868	87.0042	230.436	2.10401	0.235412	8.93755	3.97902e-19	1.47491e-17	Up	N_WCS417_30m-N_Control	RNC	AT5G17990	TRP1	Encodes the tryptophan biosynthetic enzyme phosphoribosylanthranilate transferase (PAT1, called trpD in bacteria). Converts anthranilate and phosphoribosylpyrophosphate into phosphoribosylanthranilate and inorganic pyrophosphate.
BnaA01G0071600ZS	N_WCS417_30m	N_Control	6015.53	8519.84	7267.69	-0.502082	0.0561783	-8.93729	3.9882e-19	1.47715e-17	Normal	N_WCS417_30m-N_Control	RNC	AT4G30190	PMA2	belongs to the P-type ATPase superfamily of cation-transporting ATPases, pumps protons out of the cell, generating a proton gradient that drives the active transport of nutrients by proton symport. has two autoinhibitory regions within the C-terminal dom
BnaC04G0351500ZS	N_WCS417_30m	N_Control	181.765	583.22	382.493	-1.68187	0.18822	-8.93565	4.04782e-19	1.49805e-17	Down	N_WCS417_30m-N_Control	RNC	AT4G14450	PH1	--
BnaA02G0084600ZS	N_WCS417_30m	N_Control	567.986	161.843	364.915	1.81436	0.20309	8.93379	4.11676e-19	1.52236e-17	Up	N_WCS417_30m-N_Control	RNC	AT5G20250	RS6	encodes a member of glycosyl hydrolase family 36. Expression is induced within 3 hours of dark treatment, in senescing leaves and treatment with exogenous photosynthesis inhibitor. Induction of gene expression was suppressed in excised leaves supplied with sugar. The authors suggest that the gene's expression pattern is responding to the level of sugar in the cell.
BnaC08G0173700ZS	N_WCS417_30m	N_Control	247.818	678.073	462.945	-1.45276	0.162696	-8.92928	4.28809e-19	1.58446e-17	Down	N_WCS417_30m-N_Control	RNC	AT4G27657	--	--
BnaC07G0477800ZS	N_WCS417_30m	N_Control	102.374	402.365	252.369	-1.97548	0.221283	-8.92743	4.36017e-19	1.60956e-17	Down	N_WCS417_30m-N_Control	RNC	AT4G27657	--	--
BnaC05G0066800ZS	N_WCS417_30m	N_Control	479.678	125.185	302.431	1.9412	0.217444	8.92736	4.36288e-19	1.60956e-17	Up	N_WCS417_30m-N_Control	RNC	AT1G08940	--	Phosphoglycerate mutase family protein
BnaC05G0057800ZS	N_WCS417_30m	N_Control	6845.9	4717.13	5781.51	0.537272	0.060207	8.92375	4.50765e-19	1.66165e-17	Normal	N_WCS417_30m-N_Control	RNC	AT1G07890	MEE6	Encodes a cytosolic ascorbate peroxidase APX1. Ascorbate peroxidases are enzymes that scavenge hydrogen peroxide in plant cells. Eight types of APX have been described for Arabidopsis: three cytosolic (APX1, APX2, APX6), two chloroplastic types (stromal sAPX, thylakoid tAPX), and three microsomal (APX3, APX4, APX5) isoforms. At least part of the induction of heat shock proteins during light stres…
Bnascaffold0027G0058400ZS	N_WCS417_30m	N_Control	678.741	1348.95	1013.85	-0.990916	0.111056	-8.92264	4.55289e-19	1.67701e-17	Normal	N_WCS417_30m-N_Control	RNC	--	--	--
BnaC05G0131900ZS	N_WCS417_30m	N_Control	1021.45	453.08	737.264	1.17216	0.131397	8.92074	4.63163e-19	1.70467e-17	Up	N_WCS417_30m-N_Control	RNC	AT1G15780	NRB4	--
BnaC01G0161800ZS	N_WCS417_30m	N_Control	5548.61	3682.69	4615.65	0.591634	0.0663282	8.91979	4.67181e-19	1.71811e-17	Normal	N_WCS417_30m-N_Control	RNC	AT4G23100	RML1	Encodes the enzyme glutamate-cysteine ligase catalyzing the first, and rate-limiting, step of glutathione biosynthesis. Required for cell proliferation at the root tip. Involved in susceptibility to the bacterial pathogen Pseudomonas syringae. Mutants are phytoalexin defective.
Bnascaffold0022G0001400ZS	N_WCS417_30m	N_Control	1052.91	1986.51	1519.71	-0.915312	0.102628	-8.91872	4.71711e-19	1.73341e-17	Normal	N_WCS417_30m-N_Control	RNC	--	--	--
BnaC03G0315800ZS	N_WCS417_30m	N_Control	258.916	34.341	146.628	2.92026	0.328155	8.89905	5.63276e-19	2.06826e-17	Up	N_WCS417_30m-N_Control	RNC	AT4G05070	WIP2	Wound-responsive family protein
BnaA09G0289800ZS	N_WCS417_30m	N_Control	566.705	1233.23	899.967	-1.12255	0.126202	-8.8949	5.84695e-19	2.14523e-17	Down	N_WCS417_30m-N_Control	RNC	AT2G01021	--	--
Bnascaffold1644G0000300ZS	N_WCS417_30m	N_Control	1111.95	2024.91	1568.43	-0.864438	0.0972073	-8.89272	5.96284e-19	2.18603e-17	Normal	N_WCS417_30m-N_Control	RNC	--	--	--
Bnascaffold0414G0000500ZS	N_WCS417_30m	N_Control	779.954	1496.65	1138.3	-0.940247	0.105739	-8.89212	5.99512e-19	2.19615e-17	Normal	N_WCS417_30m-N_Control	RNC	--	--	--
Bnascaffold2742G0000100ZS	N_WCS417_30m	N_Control	1489.6	2645.34	2067.47	-0.828213	0.0931651	-8.88973	6.12593e-19	2.24231e-17	Normal	N_WCS417_30m-N_Control	RNC	--	--	--
Bnascaffold0032G0000700ZS	N_WCS417_30m	N_Control	960.987	1754.47	1357.73	-0.868417	0.097698	-8.8888	6.17727e-19	2.25934e-17	Normal	N_WCS417_30m-N_Control	RNC	--	--	--
BnaC04G0015700ZS	N_WCS417_30m	N_Control	303.864	778.927	541.396	-1.35776	0.152829	-8.88413	6.44203e-19	2.35433e-17	Down	N_WCS417_30m-N_Control	RNC	AT2G46400	WRKY46	member of WRKY Transcription Factor; Group III
BnaA05G0301100ZS	N_WCS417_30m	N_Control	951.906	2032.91	1492.41	-1.09533	0.1233	-8.88346	6.48104e-19	2.36674e-17	Down	N_WCS417_30m-N_Control	RNC	--	--	--
BnaA02G0243400ZS	N_WCS417_30m	N_Control	408.935	97.1498	253.042	2.07059	0.233212	8.87857	6.77227e-19	2.47043e-17	Up	N_WCS417_30m-N_Control	RNC	AT2G26865	--	Encodes a Plant thionin family protein
Bnascaffold0027G0057900ZS	N_WCS417_30m	N_Control	1485.25	2507.48	1996.36	-0.755469	0.0850895	-8.87852	6.77553e-19	2.47043e-17	Normal	N_WCS417_30m-N_Control	RNC	--	--	--
BnaA01G0073800ZS	N_WCS417_30m	N_Control	284.226	45.2048	164.715	2.64872	0.298332	8.87842	6.78142e-19	2.47065e-17	Up	N_WCS417_30m-N_Control	RNC	AT4G29930	--	basic helix-loop-helix (bHLH) DNA-binding superfamily protein
BnaA10G0273300ZS	N_WCS417_30m	N_Control	643.993	229.75	436.871	1.48756	0.167574	8.87705	6.8655e-19	2.49934e-17	Up	N_WCS417_30m-N_Control	RNC	AT5G05730	WEI2	ASA1 encodes the alpha subunit of anthranilate synthase, which catalyzes the rate-limiting step of tryptophan synthesis. ASA1 is induced by ethylene, and forms a link between ethylene signalling and auxin synthesis in roots.
Bnascaffold1635G0000500ZS	N_WCS417_30m	N_Control	1216.06	2118.33	1667.2	-0.800716	0.09022	-8.87515	6.98416e-19	2.54056e-17	Normal	N_WCS417_30m-N_Control	RNC	--	--	--
BnaA03G0485500ZS	N_WCS417_30m	N_Control	406.963	935.865	671.414	-1.20171	0.135413	-8.87446	7.02762e-19	2.55439e-17	Down	N_WCS417_30m-N_Control	RNC	AT4G25340	FKBP53	Encodes a member of the FKBP-type immunophilin family that functions as a histone chaparone. Binds to 18S rDNA and represses its expression.
BnaA09G0275200ZS	N_WCS417_30m	N_Control	465.96	1116.74	791.351	-1.25993	0.142084	-8.86748	7.4817e-19	2.71733e-17	Down	N_WCS417_30m-N_Control	RNC	--	--	--
Bnascaffold0027G0037700ZS	N_WCS417_30m	N_Control	990.195	1811.15	1400.67	-0.871216	0.0982704	-8.86549	7.61669e-19	2.76421e-17	Normal	N_WCS417_30m-N_Control	RNC	--	--	--
BnaC02G0149700ZS	N_WCS417_30m	N_Control	1710.1	913.938	1312.02	0.904017	0.101982	8.86449	7.68575e-19	2.78711e-17	Normal	N_WCS417_30m-N_Control	RNC	AT5G56980	--	--
BnaC05G0266700ZS	N_WCS417_30m	N_Control	1091.87	501.129	796.497	1.12418	0.126826	8.86396	7.72214e-19	2.79814e-17	Up	N_WCS417_30m-N_Control	RNC	AT1G30730	AtBBE11	FAD-binding Berberine family protein
Bnascaffold0027G0027800ZS	N_WCS417_30m	N_Control	1285.5	2237.07	1761.28	-0.799287	0.0901782	-8.86342	7.75982e-19	2.80962e-17	Normal	N_WCS417_30m-N_Control	RNC	--	--	--
BnaA03G0292400ZS	N_WCS417_30m	N_Control	1130.69	516.948	823.818	1.12823	0.127323	8.86118	7.91725e-19	2.86441e-17	Up	N_WCS417_30m-N_Control	RNC	AT3G03780	MS2	Encodes a cytosolic methionine synthase, involved in methionine regeneration via the activated methyl cycle (or SAM cycle)
BnaC03G0795700ZS	N_WCS417_30m	N_Control	135.584	468.416	302	-1.78827	0.201867	-8.85863	8.1003e-19	2.92837e-17	Down	N_WCS417_30m-N_Control	RNC	AT3G15210	RAP2.5	Encodes a member of the ERF (ethylene response factor) subfamily B-1 of ERF/AP2 transcription factor family (ATERF-4). The protein contains one AP2 domain. Acts as a negative regulator of JA-responsive defense gene expression and resistance to the necrotrophic fungal pathogen Fusarium oxysporum and antagonizes JA inhibition of root elongation.
BnaA09G0084700ZS	N_WCS417_30m	N_Control	263.839	691.305	477.572	-1.38967	0.157019	-8.85034	8.72548e-19	3.15194e-17	Down	N_WCS417_30m-N_Control	RNC	AT5G63530	FP3	Farnesylated protein that binds metals.
Bnascaffold0036G0000400ZS	N_WCS417_30m	N_Control	874.599	1631.6	1253.1	-0.899812	0.101674	-8.84994	8.75651e-19	3.16072e-17	Normal	N_WCS417_30m-N_Control	RNC	--	--	--
BnaC01G0134900ZS	N_WCS417_30m	N_Control	8104.83	5701.66	6903.25	0.507499	0.0573964	8.842	9.40176e-19	3.39101e-17	Normal	N_WCS417_30m-N_Control	RNC	AT4G20860	CELLOX	FAD-binding Berberine family protein
BnaC02G0095000ZS	N_WCS417_30m	N_Control	456.711	1038.94	747.827	-1.1864	0.134198	-8.84064	9.51693e-19	3.4299e-17	Down	N_WCS417_30m-N_Control	RNC	AT5G19530	ACL5	Encodes a spermine synthase. Required for internode elongation and vascular development, specifically in the mechanism that defines the boundaries between veins and nonvein regions. This mechanism may be mediated by polar auxin transport. Though ACL5 has been shown to function as a spermine synthase in E. coli, an ACL5 knockout has no effect on the endogenous levels of free and conjugated polyami…
BnaA06G0141200ZS	N_WCS417_30m	N_Control	242.358	33.4522	137.905	2.85558	0.323242	8.83421	1.00806e-18	3.63026e-17	Up	N_WCS417_30m-N_Control	RNC	AT1G20070	--	--
BnaA05G0372100ZS	N_WCS417_30m	N_Control	97.502	442.416	269.959	-2.18324	0.247284	-8.82886	1.05748e-18	3.8028e-17	Down	N_WCS417_30m-N_Control	RNC	AT3G18710	PUB29	Encodes a protein containing a U-box and an ARM domain. This protein has E3 ubiquitin ligase activity based on in vitro assays.
BnaC01G0362000ZS	N_WCS417_30m	N_Control	721.492	1453.64	1087.57	-1.01082	0.114491	-8.82885	1.0576e-18	3.8028e-17	Down	N_WCS417_30m-N_Control	RNC	AT3G23250	MYB15	Member of the R2R3 factor gene family.
Bnascaffold2779G0000200ZS	N_WCS417_30m	N_Control	1027.45	1903.02	1465.24	-0.889415	0.100744	-8.82849	1.06095e-18	3.81191e-17	Normal	N_WCS417_30m-N_Control	RNC	AT3G04380	SUVR4	Encodes SUVR4, a nucleolar histone methyltransferase with preference for monomethylated H3K9. One of the four closely related Arabidopsis SUVR proteins that belong to the SU(VAR)3-9 subgroup of SET-domain proteins. Proteins containing the evolutionarily conserved SET domain are involved in regulation of eukaryotic gene expression and chromatin structure through their histone lysine methyltransfer…
Bnascaffold0137G0000500ZS	N_WCS417_30m	N_Control	1441.89	2504.54	1973.21	-0.79614	0.0902025	-8.82614	1.0835e-18	3.88995e-17	Normal	N_WCS417_30m-N_Control	RNC	--	--	--
BnaA06G0230300ZS	N_WCS417_30m	N_Control	664.696	1409.53	1037.12	-1.08431	0.122919	-8.82135	1.13086e-18	4.05687e-17	Down	N_WCS417_30m-N_Control	RNC	--	--	--
BnaA03G0311700ZS	N_WCS417_30m	N_Control	500.267	1070.41	785.34	-1.09747	0.124514	-8.81404	1.2071e-18	4.32706e-17	Down	N_WCS417_30m-N_Control	RNC	AT3G08040	MAN1	Encodes a member of the MATE (multidrug and toxin efflux family), expressed in roots but not shoots. Mutants accumulate excess iron, manganese and zinc, and express root Fe(III) chelatase activity even under iron sufficiency conditions. FRD3 is likely to function in root xylem loading of an iron chelator or other factor necessary for efficient iron uptake out of the xylem or apoplastic space and …
Bnascaffold0136G0000100ZS	N_WCS417_30m	N_Control	1280.65	2228.97	1754.81	-0.799498	0.0908039	-8.80467	1.31241e-18	4.70096e-17	Normal	N_WCS417_30m-N_Control	RNC	--	--	--
BnaA05G0263800ZS	N_WCS417_30m	N_Control	503.725	1075.84	789.781	-1.09472	0.124343	-8.80403	1.31989e-18	4.72415e-17	Down	N_WCS417_30m-N_Control	RNC	--	--	--
BnaA08G0115900ZS	N_WCS417_30m	N_Control	99.5608	416.798	258.179	-2.06795	0.234923	-8.80267	1.33595e-18	4.778e-17	Down	N_WCS417_30m-N_Control	RNC	AT4G19810	ChiC	ChiC encodes a Class V chitinase that is a part of glycoside hydrolase family 18 based on CAZy groupings. It appears to primarily act as an exochitinase in vitro where it predominantly cleaves a chitobiose (GlcNAc)2 residue from the non-reducing end of a chitin oligosaccharide. However, it shows some minor endochitinase activity in vitro, as well. A putative 24 amino-acid signal peptide may direc…
Bnascaffold0036G0000100ZS	N_WCS417_30m	N_Control	948.43	1740.84	1344.63	-0.875867	0.099559	-8.79747	1.39935e-18	5.0009e-17	Normal	N_WCS417_30m-N_Control	RNC	--	--	--
Bnascaffold0022G0000800ZS	N_WCS417_30m	N_Control	980.337	1804.34	1392.34	-0.879964	0.100049	-8.79533	1.42624e-18	5.09313e-17	Normal	N_WCS417_30m-N_Control	RNC	--	--	--
Bnascaffold2635G0000200ZS	N_WCS417_30m	N_Control	684.026	1346.21	1015.12	-0.976909	0.111074	-8.7951	1.42926e-18	5.10001e-17	Normal	N_WCS417_30m-N_Control	RNC	--	--	--
BnaA09G0653000ZS	N_WCS417_30m	N_Control	1031.24	472.597	751.92	1.12571	0.128039	8.79194	1.47e-18	5.24139e-17	Up	N_WCS417_30m-N_Control	RNC	AT1G11580	PMEPCRA	methylesterase PCR A
BnaC05G0535200ZS	N_WCS417_30m	N_Control	393.5	91.3911	242.445	2.10949	0.240164	8.78353	1.58419e-18	5.64424e-17	Up	N_WCS417_30m-N_Control	RNC	AT3G05500	SRP3	Encodes a protein that associates with lipid droplet surfaces.
Bnascaffold0027G0057600ZS	N_WCS417_30m	N_Control	1271.52	2182.48	1727	-0.779544	0.0887572	-8.78287	1.5935e-18	5.67309e-17	Normal	N_WCS417_30m-N_Control	RNC	--	--	--
BnaA05G0228200ZS	N_WCS417_30m	N_Control	2341.78	4049.98	3195.88	-0.790718	0.0900521	-8.78067	1.62499e-18	5.78081e-17	Normal	N_WCS417_30m-N_Control	RNC	--	--	--
BnaA01G0099400ZS	N_WCS417_30m	N_Control	441.76	99.8445	270.802	2.14248	0.244141	8.77559	1.70012e-18	6.0435e-17	Up	N_WCS417_30m-N_Control	RNC	AT4G18950	BHP	Integrin-linked protein kinase family
BnaC06G0023900ZS	N_WCS417_30m	N_Control	405.898	945.684	675.791	-1.21997	0.139032	-8.77474	1.71303e-18	6.08476e-17	Down	N_WCS417_30m-N_Control	RNC	AT1G47960	CIF1	Plant cell wall (CWI) and vacuolar invertases (VI) play important roles in carbohydrate metabolism, stress responses and sugar signaling. This protein may inhibit their activity.
BnaC04G0540200ZS	N_WCS417_30m	N_Control	870.626	352.24	611.433	1.30689	0.148965	8.77315	1.73731e-18	6.16632e-17	Up	N_WCS417_30m-N_Control	RNC	AT2G35510	SRO1	Encodes a WWE domain-containing protein with 76% similarity to RCD1. The protein also contains a PARP signature upstream of the C-terminal protein interaction domain. The PARP signature may bind NAD+ and attach the ADP-ribose-moiety from NAD+ to the target molecule. Its presence suggests a role for the protein in ADP ribosylation.
BnaC02G0461300ZS	N_WCS417_30m	N_Control	735.201	1447.06	1091.13	-0.976469	0.111312	-8.77239	1.74913e-18	6.20358e-17	Normal	N_WCS417_30m-N_Control	RNC	AT3G27270	--	TRAM, LAG1 and CLN8 (TLC) lipid-sensing domain containing protein
BnaC05G0208000ZS	N_WCS417_30m	N_Control	641.072	1359.62	1000.34	-1.08548	0.123744	-8.77196	1.75582e-18	6.2226e-17	Down	N_WCS417_30m-N_Control	RNC	AT1G23710	--	Protein of unknown function (DUF1645)
BnaA02G0378700ZS	N_WCS417_30m	N_Control	777.642	310.014	543.828	1.32732	0.15135	8.76988	1.78849e-18	6.33359e-17	Up	N_WCS417_30m-N_Control	RNC	AT5G25930	NUT	Protein kinase family protein with leucine-rich repeat domain
BnaA01G0291900ZS	N_WCS417_30m	N_Control	611.514	1234.94	923.225	-1.01408	0.11564	-8.76929	1.79795e-18	6.35747e-17	Down	N_WCS417_30m-N_Control	RNC	AT3G23430	PHO1	mutant is deficient in the transfer of phosphate from root epidermal and cortical cells to the xylem. encodes protein with the mainly hydrophilic N-terminal and the C-terminal containing 6 potential membrane-spanning domains.
Bnascaffold0027G0069400ZS	N_WCS417_30m	N_Control	868.4	1626.78	1247.59	-0.905231	0.103248	-8.76751	1.82657e-18	6.45378e-17	Normal	N_WCS417_30m-N_Control	RNC	--	--	--
BnaA01G0248600ZS	N_WCS417_30m	N_Control	1295.65	2230.37	1763.01	-0.783653	0.0893862	-8.76705	1.83409e-18	6.47547e-17	Normal	N_WCS417_30m-N_Control	RNC	--	--	--
BnaC04G0014800ZS	N_WCS417_30m	N_Control	219.42	625.937	422.678	-1.51178	0.172523	-8.76276	1.9053e-18	6.72181e-17	Down	N_WCS417_30m-N_Control	RNC	AT2G46490	--	--
BnaA04G0163100ZS	N_WCS417_30m	N_Control	1430.17	735.045	1082.61	0.960653	0.109637	8.76212	1.91613e-18	6.75495e-17	Normal	N_WCS417_30m-N_Control	RNC	AT2G24570	WRKY17	member of WRKY Transcription Factor; Group II-d; negative regulator of basal resistance to Pseudomonas syringae.
BnaA02G0320000ZS	N_WCS417_30m	N_Control	632.4	223.251	427.826	1.50106	0.171368	8.75928	1.96504e-18	6.92215e-17	Up	N_WCS417_30m-N_Control	RNC	AT2G02010	GAD4	glutamate decarboxylase 4
BnaA05G0308000ZS	N_WCS417_30m	N_Control	914.03	1776.35	1345.19	-0.959031	0.109561	-8.75341	2.07007e-18	7.28666e-17	Normal	N_WCS417_30m-N_Control	RNC	--	--	--
BnaA02G0058200ZS	N_WCS417_30m	N_Control	324.737	794.627	559.682	-1.29084	0.147488	-8.7522	2.09234e-18	7.3595e-17	Down	N_WCS417_30m-N_Control	RNC	AT5G15190	--	--
Bnascaffold0530G0000900ZS	N_WCS417_30m	N_Control	1518.9	2755.85	2137.37	-0.859104	0.0981934	-8.74911	2.15047e-18	7.55346e-17	Normal	N_WCS417_30m-N_Control	RNC	--	--	--
BnaC04G0472000ZS	N_WCS417_30m	N_Control	275.373	46.0083	160.691	2.58171	0.295083	8.74909	2.15071e-18	7.55346e-17	Up	N_WCS417_30m-N_Control	RNC	AT2G26750	--	alpha/beta-Hydrolases superfamily protein
Bnascaffold0027G0010400ZS	N_WCS417_30m	N_Control	1716.91	830.715	1273.81	1.04626	0.119588	8.74883	2.15568e-18	7.56523e-17	Up	N_WCS417_30m-N_Control	RNC	AT3G09270	GSTU8	Encodes glutathione transferase belonging to the tau class of GSTs. Naming convention according to Wagner et al. (2002).
Bnascaffold0026G0024600ZS	N_WCS417_30m	N_Control	1502.6	2516.61	2009.6	-0.743789	0.0850166	-8.74874	2.15743e-18	7.56572e-17	Normal	N_WCS417_30m-N_Control	RNC	--	--	--
BnaA05G0260000ZS	N_WCS417_30m	N_Control	973.564	1773.82	1373.69	-0.865198	0.0989067	-8.74762	2.17907e-18	7.63589e-17	Normal	N_WCS417_30m-N_Control	RNC	--	--	--
Bnascaffold0335G0000100ZS	N_WCS417_30m	N_Control	97.5238	441.278	269.401	-2.17927	0.249182	-8.7457	2.21637e-18	7.76077e-17	Down	N_WCS417_30m-N_Control	RNC	AT3G18710	PUB29	Encodes a protein containing a U-box and an ARM domain. This protein has E3 ubiquitin ligase activity based on in vitro assays.
Bnascaffold0034G0000600ZS	N_WCS417_30m	N_Control	1395.65	2609.19	2002.42	-0.902	0.103177	-8.74222	2.28582e-18	7.99799e-17	Normal	N_WCS417_30m-N_Control	RNC	--	--	--
Bnascaffold0027G0059400ZS	N_WCS417_30m	N_Control	1200.27	2132.19	1666.23	-0.828996	0.0949169	-8.73391	2.46012e-18	8.60143e-17	Normal	N_WCS417_30m-N_Control	RNC	--	--	--
BnaC07G0001700ZS	N_WCS417_30m	N_Control	806.031	1573.42	1189.72	-0.965418	0.110545	-8.73322	2.47525e-18	8.64785e-17	Normal	N_WCS417_30m-N_Control	RNC	--	--	--
BnaA09G0354000ZS	N_WCS417_30m	N_Control	930.096	1761.92	1346.01	-0.922274	0.105608	-8.73295	2.48116e-18	8.66203e-17	Normal	N_WCS417_30m-N_Control	RNC	--	--	--
BnaC04G0029500ZS	N_WCS417_30m	N_Control	2645.75	4032.42	3339.08	-0.607934	0.069656	-8.72767	2.59979e-18	9.06944e-17	Normal	N_WCS417_30m-N_Control	RNC	AT1G59359	--	Ribosomal protein S5 family protein
BnaC03G0782400ZS	N_WCS417_30m	N_Control	379.653	90.0329	234.843	2.07464	0.237767	8.72553	2.64947e-18	9.23586e-17	Up	N_WCS417_30m-N_Control	RNC	AT1G50420	SCL3	Encodes a scarecrow-like protein (SCL3) Putative transcription factors interacting with the gene product of VHA-B1 (vacuolar ATPase subunit B1; as shown through yeast two-hybrid assay).
BnaC07G0336200ZS	N_WCS417_30m	N_Control	812.005	327.483	569.744	1.30906	0.150031	8.72529	2.65494e-18	9.24805e-17	Up	N_WCS417_30m-N_Control	RNC	AT5G49450	bZIP1	Encodes a transcription activator is a positive regulator of plant tolerance to salt, osmotic and drought stresses.
Bnascaffold0026G0026900ZS	N_WCS417_30m	N_Control	1558.8	2651.84	2105.32	-0.766236	0.0878668	-8.72043	2.77148e-18	9.64682e-17	Normal	N_WCS417_30m-N_Control	RNC	--	--	--
BnaA05G0209700ZS	N_WCS417_30m	N_Control	528.112	1135.98	832.047	-1.10437	0.126659	-8.71919	2.80199e-18	9.74577e-17	Down	N_WCS417_30m-N_Control	RNC	--	--	--
BnaA03G0389500ZS	N_WCS417_30m	N_Control	505.588	156.859	331.223	1.68895	0.193913	8.70984	3.04301e-18	1.05762e-16	Up	N_WCS417_30m-N_Control	RNC	AT2G06050	OPR3	Encodes a 12-oxophytodienoate reductase that is required for jasmonate biosynthesis. Mutants are male sterile and defective in pollen dehiscence. Shows activity towards 2,4,6-trinitrotoluene.
BnaC04G0329100ZS	N_WCS417_30m	N_Control	442.755	122.525	282.64	1.85516	0.213072	8.70673	3.12763e-18	1.08623e-16	Up	N_WCS417_30m-N_Control	RNC	AT3G54020	AtIPCS1	Inositol phosphorylceramide synthase
BnaC04G0184600ZS	N_WCS417_30m	N_Control	1213.92	575.755	894.838	1.07709	0.123749	8.70384	3.20835e-18	1.11343e-16	Up	N_WCS417_30m-N_Control	RNC	AT2G29500	HSP17.6B	HSP20-like chaperones superfamily protein
BnaC09G0175400ZS	N_WCS417_30m	N_Control	1809.17	1007.72	1408.44	0.844314	0.0970561	8.69924	3.34124e-18	1.15869e-16	Normal	N_WCS417_30m-N_Control	RNC	AT1G61890	--	MATE efflux family protein
Bnascaffold0032G0000400ZS	N_WCS417_30m	N_Control	854.93	1615.71	1235.32	-0.917804	0.105508	-8.69895	3.34977e-18	1.16079e-16	Normal	N_WCS417_30m-N_Control	RNC	--	--	--
BnaA07G0085000ZS	N_WCS417_30m	N_Control	138.702	462.366	300.534	-1.73646	0.199637	-8.6981	3.37493e-18	1.16864e-16	Down	N_WCS417_30m-N_Control	RNC	AT1G30370	DLAH	Encodes a mitochondria-localized class III phospholipase A1 that plays a role in seed viability.
BnaC03G0585500ZS	N_WCS417_30m	N_Control	1859.33	3253.77	2556.55	-0.806867	0.0928069	-8.69405	3.49753e-18	1.2102e-16	Normal	N_WCS417_30m-N_Control	RNC	--	--	--
BnaC06G0329800ZS	N_WCS417_30m	N_Control	686.577	1359.79	1023.18	-0.986164	0.113462	-8.69155	3.57517e-18	1.23615e-16	Normal	N_WCS417_30m-N_Control	RNC	AT5G43620	--	Pre-mRNA cleavage complex II
BnaA09G0279000ZS	N_WCS417_30m	N_Control	811.447	1698.53	1254.99	-1.06514	0.122578	-8.68947	3.64126e-18	1.25808e-16	Down	N_WCS417_30m-N_Control	RNC	--	--	--
Bnascaffold1728G0000700ZS	N_WCS417_30m	N_Control	1063.53	1880.9	1472.21	-0.822504	0.0947039	-8.68501	3.78705e-18	1.30748e-16	Normal	N_WCS417_30m-N_Control	RNC	--	--	--
BnaA10G0084200ZS	N_WCS417_30m	N_Control	452.02	986.779	719.4	-1.12648	0.129718	-8.68408	3.81835e-18	1.31732e-16	Down	N_WCS417_30m-N_Control	RNC	AT5G51190	ERF105	encodes a member of the ERF (ethylene response factor) subfamily B-3 of ERF/AP2 transcription factor family. The protein contains one AP2 domain. There are 18 members in this subfamily including ATERF-1, ATERF-2, AND ATERF-5.
BnaA09G0350800ZS	N_WCS417_30m	N_Control	694.574	1357.75	1026.16	-0.967285	0.111396	-8.68331	3.84431e-18	1.3253e-16	Normal	N_WCS417_30m-N_Control	RNC	--	--	--
BnaC04G0515700ZS	N_WCS417_30m	N_Control	686.455	259.534	472.994	1.40303	0.161587	8.68282	3.8609e-18	1.33004e-16	Up	N_WCS417_30m-N_Control	RNC	AT2G32020	--	Acyl-CoA N-acyltransferases (NAT) superfamily protein
Bnascaffold0532G0000100ZS	N_WCS417_30m	N_Control	823.249	1545.48	1184.37	-0.908551	0.104653	-8.68157	3.90353e-18	1.34373e-16	Normal	N_WCS417_30m-N_Control	RNC	--	--	--
BnaA05G0246100ZS	N_WCS417_30m	N_Control	1010.51	1825.05	1417.78	-0.853215	0.0983191	-8.67802	4.02722e-18	1.38529e-16	Normal	N_WCS417_30m-N_Control	RNC	--	--	--
Bnascaffold0193G0000100ZS	N_WCS417_30m	N_Control	823.329	1534.79	1179.06	-0.898477	0.103557	-8.67613	4.09476e-18	1.40749e-16	Normal	N_WCS417_30m-N_Control	RNC	--	--	--
BnaC07G0379500ZS	N_WCS417_30m	N_Control	1801.6	1004.1	1402.85	0.843558	0.0972656	8.67273	4.2189e-18	1.44831e-16	Normal	N_WCS417_30m-N_Control	RNC	AT5G61210	SNP33	membrane localized t-SNARE SNAP25 homologue, probably involved in cytokinesis and cell plate formation
Bnascaffold0026G0065100ZS	N_WCS417_30m	N_Control	1003.34	1809.35	1406.34	-0.850647	0.0980832	-8.67271	4.21969e-18	1.44831e-16	Normal	N_WCS417_30m-N_Control	RNC	--	--	--
BnaC03G0251400ZS	N_WCS417_30m	N_Control	603.894	1223.48	913.688	-1.01828	0.117459	-8.66929	4.3482e-18	1.49132e-16	Down	N_WCS417_30m-N_Control	RNC	AT2G43710	SSI2	Encodes a stearoyl-ACP desaturase, involved in fatty acid desaturation. The ssi2 mutants have increased 18:0 and reduced 18:1 fatty acids. Exogenous application of glycerol to wild type plants mimics the ssi2 mutant phenotype. The altered 18:1 fatty acid content in the ssi2 mutants has an impact on SA- and JA-mediated defense signaling. ssi2 mutants resulted in hyper-resistance to green peach aph…
BnaC09G0462600ZS	N_WCS417_30m	N_Control	884.734	380.04	632.387	1.21974	0.140722	8.66767	4.41058e-18	1.51161e-16	Up	N_WCS417_30m-N_Control	RNC	AT5G20250	RS6	encodes a member of glycosyl hydrolase family 36. Expression is induced within 3 hours of dark treatment, in senescing leaves and treatment with exogenous photosynthesis inhibitor. Induction of gene expression was suppressed in excised leaves supplied with sugar. The authors suggest that the gene's expression pattern is responding to the level of sugar in the cell.
BnaC02G0317500ZS	N_WCS417_30m	N_Control	473.479	142.661	308.07	1.731	0.199746	8.66601	4.47527e-18	1.53266e-16	Up	N_WCS417_30m-N_Control	RNC	--	--	--
BnaA06G0043900ZS	N_WCS417_30m	N_Control	711.675	1414.52	1063.1	-0.990955	0.114375	-8.66409	4.55126e-18	1.55754e-16	Normal	N_WCS417_30m-N_Control	RNC	AT1G47960	CIF1	Plant cell wall (CWI) and vacuolar invertases (VI) play important roles in carbohydrate metabolism, stress responses and sugar signaling. This protein may inhibit their activity.
BnaC03G0665400ZS	N_WCS417_30m	N_Control	1626.59	865.249	1245.92	0.910073	0.105048	8.66337	4.58019e-18	1.5663e-16	Normal	N_WCS417_30m-N_Control	RNC	AT1G30360	OSCA3.1	Early-responsive to dehydration stress protein (ERD4)
BnaA06G0306000ZS	N_WCS417_30m	N_Control	280.172	49.3357	164.754	2.50478	0.289143	8.66279	4.60344e-18	1.5731e-16	Up	N_WCS417_30m-N_Control	RNC	AT5G65690	PEPCK	Encodes a putative phosphoenolpyruvate carboxykinase (ATP-dependent).
BnaA09G0352700ZS	N_WCS417_30m	N_Control	849.712	1738.43	1294.07	-1.03361	0.119376	-8.65841	4.78411e-18	1.63365e-16	Down	N_WCS417_30m-N_Control	RNC	--	--	--
BnaC07G0541500ZS	N_WCS417_30m	N_Control	1216.69	577.312	897.002	1.07625	0.124353	8.65481	4.9372e-18	1.68469e-16	Up	N_WCS417_30m-N_Control	RNC	AT4G39950	CYP79B2	Belongs to cytochrome P450 and is involved in tryptophan metabolism. Converts Trp to indo-3-acetaldoxime (IAOx), a precursor to IAA and indole glucosinolates.
BnaA02G0126600ZS	N_WCS417_30m	N_Control	940.121	1723.15	1331.64	-0.873954	0.101107	-8.64384	5.43535e-18	1.85283e-16	Normal	N_WCS417_30m-N_Control	RNC	AT5G55660	--	DEK domain-containing chromatin associated protein
Bnascaffold0026G0006800ZS	N_WCS417_30m	N_Control	658.977	1322.46	990.718	-1.00499	0.116267	-8.64379	5.43785e-18	1.85283e-16	Down	N_WCS417_30m-N_Control	RNC	--	--	--
BnaC09G0585200ZS	N_WCS417_30m	N_Control	401.286	103.101	252.194	1.96231	0.227139	8.63924	5.65876e-18	1.92669e-16	Up	N_WCS417_30m-N_Control	RNC	AT5G06300	LOG7	Putative lysine decarboxylase family protein
Bnascaffold3099G0000200ZS	N_WCS417_30m	N_Control	765.44	1448.76	1107.1	-0.92034	0.106594	-8.63406	5.92134e-18	2.01463e-16	Normal	N_WCS417_30m-N_Control	RNC	--	--	--
BnaA04G0282900ZS	N_WCS417_30m	N_Control	326.194	70.5305	198.362	2.21013	0.256111	8.62957	6.15822e-18	2.09371e-16	Up	N_WCS417_30m-N_Control	RNC	AT2G44670	--	Protein of unknown function (DUF581)
BnaC06G0194500ZS	N_WCS417_30m	N_Control	686.564	250.739	468.651	1.45446	0.168554	8.62902	6.18781e-18	2.10224e-16	Up	N_WCS417_30m-N_Control	RNC	AT3G55430	--	O-Glycosyl hydrolases family 17 protein
BnaA08G0000200ZS	N_WCS417_30m	N_Control	803.892	1520.07	1161.98	-0.919098	0.10653	-8.62762	6.26434e-18	2.12669e-16	Normal	N_WCS417_30m-N_Control	RNC	AT1G56110	NOP56	NOP56-like protein
Bnascaffold0026G0050700ZS	N_WCS417_30m	N_Control	1093.09	1939.75	1516.42	-0.827338	0.0959102	-8.62617	6.34397e-18	2.15217e-16	Normal	N_WCS417_30m-N_Control	RNC	AT2G36950	AtHMP20	Heavy metal transport/detoxification superfamily protein
BnaC09G0579500ZS	N_WCS417_30m	N_Control	4663.17	3094.54	3878.86	0.591644	0.0685989	8.62468	6.42714e-18	2.1788e-16	Normal	N_WCS417_30m-N_Control	RNC	AT5G06860	PGIP1	Encodes a polygalacturonase inhibiting protein involved in defense response. PGIPs inhibit the function of cell wall pectin degrading enzymes such as those produced by fungal pathogens. PGIP1 is induced by fungal infection. Suppressed in the proton sensitive stop1-mutant, but the transcription level was recovered by transformation of STOP2. Knockout mutant showed severe damage in the root tip in …
BnaA05G0226800ZS	N_WCS417_30m	N_Control	1076.98	1973.27	1525.13	-0.873885	0.101327	-8.62444	6.44097e-18	2.18191e-16	Normal	N_WCS417_30m-N_Control	RNC	--	--	--
Bnascaffold2999G0000100ZS	N_WCS417_30m	N_Control	853.908	1580.97	1217.44	-0.888462	0.103025	-8.6238	6.47702e-18	2.19254e-16	Normal	N_WCS417_30m-N_Control	RNC	--	--	--
BnaA05G0045500ZS	N_WCS417_30m	N_Control	1217.93	599.928	908.93	1.02204	0.118537	8.62216	6.57006e-18	2.22136e-16	Up	N_WCS417_30m-N_Control	RNC	AT2G44490	PEN2	Encodes a glycosyl hydrolase that localizes to peroxisomes and acts as a component of an inducible preinvasion resistance mechanism. Required for mlo resistance.
BnaA05G0207500ZS	N_WCS417_30m	N_Control	486.42	1107.88	797.148	-1.18696	0.137664	-8.62214	6.57164e-18	2.22136e-16	Down	N_WCS417_30m-N_Control	RNC	--	--	--
BnaC08G0387800ZS	N_WCS417_30m	N_Control	910.267	390.115	650.191	1.22348	0.141905	8.62179	6.5915e-18	2.22522e-16	Up	N_WCS417_30m-N_Control	RNC	AT3G59350	MAZ	Protein kinase superfamily protein
BnaA09G0274800ZS	N_WCS417_30m	N_Control	609.195	1318.99	964.092	-1.11541	0.129371	-8.62177	6.59259e-18	2.22522e-16	Down	N_WCS417_30m-N_Control	RNC	--	--	--
BnaA01G0231800ZS	N_WCS417_30m	N_Control	474.458	1030.23	752.346	-1.11887	0.129853	-8.61645	6.90628e-18	2.32943e-16	Down	N_WCS417_30m-N_Control	RNC	AT3G46600	--	GRAS family transcription factor
Bnascaffold0051G0000100ZS	N_WCS417_30m	N_Control	996.206	1801.83	1399.02	-0.855235	0.099258	-8.61628	6.91618e-18	2.33109e-16	Normal	N_WCS417_30m-N_Control	RNC	--	--	--
BnaA04G0116900ZS	N_WCS417_30m	N_Control	700.569	253.775	477.172	1.46681	0.170439	8.60605	7.56246e-18	2.54708e-16	Up	N_WCS417_30m-N_Control	RNC	AT5G40370	GRXC2	Glutaredoxin family protein
Bnascaffold1728G0001000ZS	N_WCS417_30m	N_Control	1258.37	2225.34	1741.85	-0.822399	0.0955617	-8.60595	7.5688e-18	2.54738e-16	Normal	N_WCS417_30m-N_Control	RNC	--	--	--
BnaA02G0104900ZS	N_WCS417_30m	N_Control	292.322	769.052	530.687	-1.39437	0.162076	-8.6032	7.75243e-18	2.60731e-16	Down	N_WCS417_30m-N_Control	RNC	AT5G59550	RDUF2	Encodes an ABA- and drought-induced RING-DUF1117 gene whose mutation results in hyposensitive phenotypes toward ABA in terms of germination rate and stomatal closure and markedly reduced tolerance to drought stress relative to wild-type plants.
BnaA03G0393800ZS	N_WCS417_30m	N_Control	1854.2	3058.82	2456.51	-0.72205	0.0839454	-8.60142	7.87372e-18	2.6462e-16	Normal	N_WCS417_30m-N_Control	RNC	--	--	--
BnaA03G0541500ZS	N_WCS417_30m	N_Control	3024.73	1873.98	2449.36	0.691016	0.0803923	8.59554	8.28707e-18	2.78312e-16	Normal	N_WCS417_30m-N_Control	RNC	AT4G34050	CCoAOMT1	S-adenosyl-L-methionine-dependent methyltransferases superfamily protein
BnaA06G0249400ZS	N_WCS417_30m	N_Control	1243.51	2173.47	1708.49	-0.805119	0.0937229	-8.59042	8.66553e-18	2.90814e-16	Normal	N_WCS417_30m-N_Control	RNC	--	--	--
BnaA09G0129600ZS	N_WCS417_30m	N_Control	486.34	150.162	318.251	1.69628	0.197552	8.5865	8.96578e-18	3.00675e-16	Up	N_WCS417_30m-N_Control	RNC	AT1G62975	--	basic helix-loop-helix (bHLH) DNA-binding superfamily protein
BnaA05G0251600ZS	N_WCS417_30m	N_Control	608.725	1321.28	965.002	-1.11862	0.130293	-8.58543	9.05004e-18	3.03283e-16	Down	N_WCS417_30m-N_Control	RNC	--	--	--
BnaA05G0239900ZS	N_WCS417_30m	N_Control	1091.88	2146.55	1619.22	-0.975758	0.113707	-8.58133	9.37828e-18	3.14058e-16	Normal	N_WCS417_30m-N_Control	RNC	--	--	--
BnaC07G0266800ZS	N_WCS417_30m	N_Control	863.617	366.04	614.828	1.23785	0.144263	8.58052	9.44463e-18	3.16054e-16	Up	N_WCS417_30m-N_Control	RNC	AT2G01450	MPK17	member of MAP Kinase
BnaC09G0446200ZS	N_WCS417_30m	N_Control	1461.43	747.225	1104.33	0.967976	0.112845	8.57796	9.65728e-18	3.22939e-16	Normal	N_WCS417_30m-N_Control	RNC	AT5G22630	ADT5	Encodes a plastid-localized arogenate dehydratase involved in phenylalanine biosynthesis. Not less than six genes encoding ADT were identi&#64257;ed in the Arabidopsis genome: ADT1 [At1g11790]; ADT2 [At3g07630]; ADT3 [At2g27820]; ADT4 [At3g44720]; ADT5 [At5g22630]; and ADT6 [At1g08250].
BnaA05G0192400ZS	N_WCS417_30m	N_Control	932.486	1852.66	1392.57	-0.990343	0.115455	-8.57776	9.67395e-18	3.23266e-16	Normal	N_WCS417_30m-N_Control	RNC	--	--	--
BnaC06G0221700ZS	N_WCS417_30m	N_Control	1769.08	989.73	1379.4	0.837995	0.0976984	8.57737	9.7068e-18	3.24132e-16	Normal	N_WCS417_30m-N_Control	RNC	AT3G59970	MTHFR1	methylenetetrahydrofolate reductase MTHFR1 mRNA, complete
BnaC07G0443200ZS	N_WCS417_30m	N_Control	4745.66	3172.83	3959.24	0.580829	0.0677454	8.57371	1.00207e-17	3.34377e-16	Normal	N_WCS417_30m-N_Control	RNC	AT4G22690	CYP706A1	member of CYP706A
BnaA07G0323600ZS	N_WCS417_30m	N_Control	522.066	170.382	346.224	1.61554	0.188436	8.57343	1.00444e-17	3.34928e-16	Up	N_WCS417_30m-N_Control	RNC	AT1G71110	--	--
BnaC05G0049200ZS	N_WCS417_30m	N_Control	1277.74	636.573	957.156	1.00528	0.117271	8.57227	1.01464e-17	3.3809e-16	Up	N_WCS417_30m-N_Control	RNC	AT1G06800	PLA-I{gamma}1	Encodes a lipase that hydrolyzes phosphatidylcholine, glycolipids as well as triacylglycerols.
BnaA09G0668700ZS	N_WCS417_30m	N_Control	3709.78	2402.31	3056.04	0.626672	0.0731305	8.56923	1.04176e-17	3.46879e-16	Normal	N_WCS417_30m-N_Control	RNC	AT1G07890	MEE6	Encodes a cytosolic ascorbate peroxidase APX1. Ascorbate peroxidases are enzymes that scavenge hydrogen peroxide in plant cells. Eight types of APX have been described for Arabidopsis: three cytosolic (APX1, APX2, APX6), two chloroplastic types (stromal sAPX, thylakoid tAPX), and three microsomal (APX3, APX4, APX5) isoforms. At least part of the induction of heat shock proteins during light stres…
BnaA05G0292200ZS	N_WCS417_30m	N_Control	402.266	912.025	657.145	-1.18149	0.13793	-8.56585	1.07281e-17	3.56963e-16	Down	N_WCS417_30m-N_Control	RNC	--	--	--
BnaA09G0296700ZS	N_WCS417_30m	N_Control	528.259	1139.61	833.933	-1.10955	0.129594	-8.5618	1.11121e-17	3.69479e-16	Down	N_WCS417_30m-N_Control	RNC	--	--	--
BnaC09G0429500ZS	N_WCS417_30m	N_Control	585.698	1206.21	895.955	-1.0428	0.121858	-8.55749	1.15355e-17	3.83283e-16	Down	N_WCS417_30m-N_Control	RNC	AT5G59550	RDUF2	Encodes an ABA- and drought-induced RING-DUF1117 gene whose mutation results in hyposensitive phenotypes toward ABA in terms of germination rate and stomatal closure and markedly reduced tolerance to drought stress relative to wild-type plants.
BnaA09G0321800ZS	N_WCS417_30m	N_Control	687.411	1330.25	1008.83	-0.952467	0.111354	-8.55349	1.19418e-17	3.96501e-16	Normal	N_WCS417_30m-N_Control	RNC	--	--	--
Bnascaffold1862G0000100ZS	N_WCS417_30m	N_Control	829.028	1540.7	1184.86	-0.894138	0.104557	-8.55171	1.21279e-17	4.02397e-16	Normal	N_WCS417_30m-N_Control	RNC	--	--	--
BnaA01G0245400ZS	N_WCS417_30m	N_Control	1460.62	2464.91	1962.76	-0.75535	0.0883832	-8.54632	1.27079e-17	4.21341e-16	Normal	N_WCS417_30m-N_Control	RNC	--	--	--
BnaC02G0161300ZS	N_WCS417_30m	N_Control	1203.88	553.515	878.699	1.12206	0.131367	8.54146	1.32538e-17	4.39129e-16	Up	N_WCS417_30m-N_Control	RNC	AT5G55180	--	O-Glycosyl hydrolases family 17 protein
BnaA05G0297800ZS	N_WCS417_30m	N_Control	744.401	1491.33	1117.87	-1.00297	0.117433	-8.54078	1.33317e-17	4.414e-16	Down	N_WCS417_30m-N_Control	RNC	--	--	--
Bnascaffold0981G0000100ZS	N_WCS417_30m	N_Control	1504.05	2527.03	2015.54	-0.748418	0.0876353	-8.54015	1.34051e-17	4.43514e-16	Normal	N_WCS417_30m-N_Control	RNC	--	--	--
Bnascaffold0044G0000200ZS	N_WCS417_30m	N_Control	765.49	1447.32	1106.41	-0.918719	0.107629	-8.53601	1.38936e-17	4.59352e-16	Normal	N_WCS417_30m-N_Control	RNC	--	--	--
BnaA03G0532900ZS	N_WCS417_30m	N_Control	223.784	615.129	419.457	-1.45816	0.170839	-8.53527	1.39833e-17	4.6199e-16	Down	N_WCS417_30m-N_Control	RNC	AT4G32610	--	copper ion binding
BnaC08G0410000ZS	N_WCS417_30m	N_Control	514.672	163.045	338.858	1.6568	0.194119	8.53498	1.40177e-17	4.628e-16	Up	N_WCS417_30m-N_Control	RNC	AT3G62010	--	--
BnaC03G0460900ZS	N_WCS417_30m	N_Control	2710.44	4106.99	3408.72	-0.599476	0.0702541	-8.53297	1.42638e-17	4.70595e-16	Normal	N_WCS417_30m-N_Control	RNC	ATCG00340	PSAB	Encodes the D1 subunit of photosystem I reaction center.
BnaA03G0240300ZS	N_WCS417_30m	N_Control	1496.95	2476.25	1986.6	-0.726382	0.0851934	-8.52627	1.51142e-17	4.98301e-16	Normal	N_WCS417_30m-N_Control	RNC	AT2G23810	TET8	Member of TETRASPANIN family
BnaC07G0258200ZS	N_WCS417_30m	N_Control	472.442	1011.1	741.772	-1.09745	0.128741	-8.52443	1.53564e-17	5.05928e-16	Down	N_WCS417_30m-N_Control	RNC	AT5G47230	ERF5	encodes a member of the ERF (ethylene response factor) subfamily B-3 of ERF/AP2 transcription factor family (ATERF-5). The protein contains one AP2 domain. There are 18 members in this subfamily including ATERF-1, ATERF-2, AND ATERF-5.
BnaA09G0716600ZS	N_WCS417_30m	N_Control	194.532	561.186	377.859	-1.52911	0.179414	-8.52278	1.55762e-17	5.12811e-16	Down	N_WCS417_30m-N_Control	RNC	AT1G01490	AtHMP01	Heavy metal transport/detoxification superfamily protein
BnaC05G0377000ZS	N_WCS417_30m	N_Control	515.463	166.763	341.113	1.62897	0.191209	8.5193	1.6052e-17	5.28104e-16	Up	N_WCS417_30m-N_Control	RNC	AT3G21070	NADK1	Encodes a protein with NAD(H) kinase activity.
BnaA09G0325200ZS	N_WCS417_30m	N_Control	623.549	1310.34	966.942	-1.07204	0.125866	-8.51728	1.63338e-17	5.36831e-16	Down	N_WCS417_30m-N_Control	RNC	--	--	--
BnaC03G0418100ZS	N_WCS417_30m	N_Control	224.045	613.892	418.968	-1.45442	0.170761	-8.51724	1.63402e-17	5.36831e-16	Down	N_WCS417_30m-N_Control	RNC	AT3G16510	--	Calcium-dependent lipid-binding (CaLB domain) family protein
BnaA09G0720700ZS	N_WCS417_30m	N_Control	90.1431	358.682	224.412	-1.99219	0.234014	-8.5131	1.69338e-17	5.55941e-16	Down	N_WCS417_30m-N_Control	RNC	AT2G44840	ERF13	encodes a member of the ERF (ethylene response factor) subfamily B-3 of ERF/AP2 transcription factor family. The protein contains one AP2 domain. There are 18 members in this subfamily including ATERF-1, ATERF-2, AND ATERF-5.
BnaC01G0437000ZS	N_WCS417_30m	N_Control	536.659	168.363	352.511	1.67344	0.19679	8.50365	1.83717e-17	6.02726e-16	Up	N_WCS417_30m-N_Control	RNC	AT3G14690	CYP72A15	putative cytochrome P450
BnaA09G0640300ZS	N_WCS417_30m	N_Control	609.702	223.301	416.501	1.44924	0.170498	8.50003	1.89542e-17	6.21401e-16	Up	N_WCS417_30m-N_Control	RNC	AT1G13470	--	Protein of unknown function (DUF1262)
Bnascaffold1925G0000500ZS	N_WCS417_30m	N_Control	1681.76	2828.07	2254.92	-0.7494	0.0881961	-8.49698	1.94592e-17	6.37511e-16	Normal	N_WCS417_30m-N_Control	RNC	--	--	--
Bnascaffold0026G0068900ZS	N_WCS417_30m	N_Control	514.347	1106.67	810.507	-1.10618	0.130226	-8.49426	1.99203e-17	6.52161e-16	Down	N_WCS417_30m-N_Control	RNC	--	--	--
BnaC08G0173800ZS	N_WCS417_30m	N_Control	27.411	219.497	123.454	-2.99799	0.352987	-8.4932	2.0102e-17	6.57648e-16	Down	N_WCS417_30m-N_Control	RNC	AT4G27657	--	--
Bnascaffold1333G0000300ZS	N_WCS417_30m	N_Control	1023.99	1832.36	1428.17	-0.839289	0.0988666	-8.48911	2.08234e-17	6.80774e-16	Normal	N_WCS417_30m-N_Control	RNC	--	--	--
BnaC07G0493000ZS	N_WCS417_30m	N_Control	165.823	8.63859	87.2306	4.27705	0.504172	8.48332	2.18857e-17	7.15006e-16	Up	N_WCS417_30m-N_Control	RNC	AT4G29930	--	basic helix-loop-helix (bHLH) DNA-binding superfamily protein
BnaA05G0192900ZS	N_WCS417_30m	N_Control	689.063	1337.31	1013.19	-0.956398	0.112781	-8.48012	2.24971e-17	7.34465e-16	Normal	N_WCS417_30m-N_Control	RNC	--	--	--
Bnascaffold1731G0000100ZS	N_WCS417_30m	N_Control	654.774	1301.07	977.92	-0.991181	0.116917	-8.47765	2.29791e-17	7.49678e-16	Normal	N_WCS417_30m-N_Control	RNC	--	--	--
BnaC07G0205200ZS	N_WCS417_30m	N_Control	361.79	90.1609	225.976	2.00358	0.236389	8.47579	2.33488e-17	7.61211e-16	Up	N_WCS417_30m-N_Control	RNC	AT5G67310	CYP81G1	member of CYP81G
BnaC06G0428500ZS	N_WCS417_30m	N_Control	197.149	564.116	380.632	-1.51591	0.178929	-8.47211	2.40979e-17	7.85084e-16	Down	N_WCS417_30m-N_Control	RNC	AT1G76880	DF1	Duplicated homeodomain-like superfamily protein
BnaA05G0165400ZS	N_WCS417_30m	N_Control	1098.43	519.999	809.213	1.07887	0.127351	8.47165	2.41931e-17	7.87639e-16	Up	N_WCS417_30m-N_Control	RNC	AT1G52720	--	--
BnaC04G0552500ZS	N_WCS417_30m	N_Control	1052.94	1867.29	1460.11	-0.826353	0.0976256	-8.46452	2.57218e-17	8.36825e-16	Normal	N_WCS417_30m-N_Control	RNC	AT2G36950	AtHMP20	Heavy metal transport/detoxification superfamily protein
BnaA02G0207100ZS	N_WCS417_30m	N_Control	93.2674	376.015	234.641	-2.01058	0.237786	-8.45543	2.78069e-17	9.04035e-16	Down	N_WCS417_30m-N_Control	RNC	AT1G73540	NUDT21	nudix hydrolase homolog 21
BnaC07G0197600ZS	N_WCS417_30m	N_Control	234.964	33.957	134.46	2.78779	0.329745	8.45439	2.80544e-17	9.11448e-16	Up	N_WCS417_30m-N_Control	RNC	AT1G20070	--	--
BnaC07G0230300ZS	N_WCS417_30m	N_Control	1621.28	850.154	1235.72	0.930466	0.110062	8.45401	2.81466e-17	9.1381e-16	Normal	N_WCS417_30m-N_Control	RNC	AT5G44390	AtBBE25	FAD-binding Berberine family protein
BnaA05G0255100ZS	N_WCS417_30m	N_Control	746.555	1525.16	1135.86	-1.03144	0.122035	-8.45199	2.86382e-17	9.29123e-16	Down	N_WCS417_30m-N_Control	RNC	--	--	--
BnaA04G0288700ZS	N_WCS417_30m	N_Control	113.038	399.67	256.354	-1.82218	0.215649	-8.44976	2.91914e-17	9.46417e-16	Down	N_WCS417_30m-N_Control	RNC	AT2G45760	BAP2	encodes a protein that is similar to BONZAI1-binding protein BAP1.
BnaC01G0121600ZS	N_WCS417_30m	N_Control	453.955	136.802	295.379	1.73029	0.204835	8.44724	2.9828e-17	9.66385e-16	Up	N_WCS417_30m-N_Control	RNC	AT4G18950	BHP	Integrin-linked protein kinase family
BnaC03G0651000ZS	N_WCS417_30m	N_Control	245.127	642.104	443.616	-1.38876	0.164417	-8.4466	2.99901e-17	9.70965e-16	Down	N_WCS417_30m-N_Control	RNC	AT1G28370	ERF11	encodes a member of the ERF (ethylene response factor) subfamily B-1 of ERF/AP2 transcription factor family. The protein contains one AP2 domain. There are 15 members in this subfamily including ATERF-3, ATERF-4, ATERF-7, and leafy petiole.
BnaA05G0253400ZS	N_WCS417_30m	N_Control	595.289	1190.52	892.905	-0.999796	0.118517	-8.4359	3.28677e-17	1.0634e-15	Normal	N_WCS417_30m-N_Control	RNC	--	--	--
BnaC04G0449400ZS	N_WCS417_30m	N_Control	354.416	851.421	602.918	-1.26348	0.149808	-8.43397	3.34131e-17	1.08029e-15	Down	N_WCS417_30m-N_Control	RNC	AT2G23760	SAW2	Encodes a member of the BEL family of homeodomain proteins. Plants doubly mutant for saw1/saw2 (blh2/blh4) have serrated leaves. BP is expressed in the serrated leaves, therefore saw2 and saw1 may act redundantly to repress BP in leaves.
BnaA05G0310000ZS	N_WCS417_30m	N_Control	571.112	1171.26	871.186	-1.0368	0.123034	-8.42691	3.549e-17	1.14665e-15	Down	N_WCS417_30m-N_Control	RNC	--	--	--
BnaC07G0071800ZS	N_WCS417_30m	N_Control	918.539	412.987	665.763	1.15387	0.136966	8.42452	3.62246e-17	1.16958e-15	Up	N_WCS417_30m-N_Control	RNC	AT2G15480	UGT73B5	UDP-glucosyl transferase 73B5
BnaA07G0051800ZS	N_WCS417_30m	N_Control	809.063	1529.9	1169.48	-0.919538	0.109244	-8.41729	3.85305e-17	1.24317e-15	Normal	N_WCS417_30m-N_Control	RNC	--	--	--
BnaA02G0020400ZS	N_WCS417_30m	N_Control	192.604	18.5782	105.591	3.36629	0.400092	8.41379	3.96966e-17	1.27992e-15	Up	N_WCS417_30m-N_Control	RNC	AT5G05600	JOX2	2-oxoglutarate (2OG) and Fe(II)-dependent oxygenase superfamily protein
BnaC03G0488000ZS	N_WCS417_30m	N_Control	1753.36	2793.41	2273.39	-0.671939	0.0798941	-8.41038	4.08686e-17	1.3168e-15	Normal	N_WCS417_30m-N_Control	RNC	--	--	--
Bnascaffold0026G0065300ZS	N_WCS417_30m	N_Control	579.55	1242	910.773	-1.10037	0.130854	-8.4091	4.13162e-17	1.3303e-15	Down	N_WCS417_30m-N_Control	RNC	--	--	--
BnaA05G0191800ZS	N_WCS417_30m	N_Control	2784.25	4666.54	3725.39	-0.744605	0.0885495	-8.40891	4.13835e-17	1.33155e-15	Normal	N_WCS417_30m-N_Control	RNC	--	--	--
BnaA04G0237000ZS	N_WCS417_30m	N_Control	1024.69	1814.28	1419.49	-0.82411	0.0980384	-8.40599	4.24264e-17	1.36417e-15	Normal	N_WCS417_30m-N_Control	RNC	AT2G36950	AtHMP20	Heavy metal transport/detoxification superfamily protein
BnaA03G0100800ZS	N_WCS417_30m	N_Control	569.008	1153.52	861.264	-1.0195	0.121361	-8.40059	4.44232e-17	1.4274e-15	Down	N_WCS417_30m-N_Control	RNC	AT5G59820	ZAT12	Encodes a zinc finger protein involved in high light and cold acclimation. Overexpression of this putative transcription factor increases the expression level of 9 cold-responsive genes and represses the expression level of 15 cold-responsive genes, including CBF genes. Also, lines overexpressing this gene exhibits a small but reproducible increase in freeze tolerance. Because of the repression o…
BnaA07G0067500ZS	N_WCS417_30m	N_Control	714.982	289.616	502.299	1.30372	0.155197	8.40041	4.44905e-17	1.42858e-15	Up	N_WCS417_30m-N_Control	RNC	AT3G24530	--	AAA-type ATPase family protein / ankyrin repeat family protein
BnaC04G0079600ZS	N_WCS417_30m	N_Control	288.416	58.5645	173.49	2.3007	0.274012	8.39635	4.60591e-17	1.47793e-15	Up	N_WCS417_30m-N_Control	RNC	AT2G38640	--	Protein of unknown function (DUF567)
Bnascaffold2085G0000100ZS	N_WCS417_30m	N_Control	810.526	1493.92	1152.22	-0.882118	0.105099	-8.39318	4.73157e-17	1.51721e-15	Normal	N_WCS417_30m-N_Control	RNC	--	--	--
Bnascaffold0027G0037000ZS	N_WCS417_30m	N_Control	604.199	1194.31	899.255	-0.983128	0.117201	-8.38839	4.92835e-17	1.57923e-15	Normal	N_WCS417_30m-N_Control	RNC	--	--	--
BnaC01G0329000ZS	N_WCS417_30m	N_Control	137.15	444.654	290.902	-1.69743	0.202384	-8.38717	4.97967e-17	1.59458e-15	Down	N_WCS417_30m-N_Control	RNC	AT1G59910	FORMIN7	Actin-binding FH2 (formin homology 2) family protein
Bnascaffold3094G0000100ZS	N_WCS417_30m	N_Control	809.046	1544.1	1176.57	-0.932742	0.111336	-8.37772	5.39617e-17	1.72677e-15	Normal	N_WCS417_30m-N_Control	RNC	--	--	--
BnaA08G0276400ZS	N_WCS417_30m	N_Control	96.1168	363.609	229.863	-1.91909	0.229088	-8.37709	5.42527e-17	1.7349e-15	Down	N_WCS417_30m-N_Control	RNC	AT1G12990	--	beta-1,4-N-acetylglucosaminyltransferase family protein
BnaA09G0604700ZS	N_WCS417_30m	N_Control	748.2	310.597	529.399	1.26819	0.151401	8.37636	5.45906e-17	1.74451e-15	Up	N_WCS417_30m-N_Control	RNC	AT2G20560	DNAJ	DNAJ heat shock family protein
BnaA06G0224400ZS	N_WCS417_30m	N_Control	592.163	1240.87	916.518	-1.06668	0.127382	-8.37391	5.57359e-17	1.7799e-15	Down	N_WCS417_30m-N_Control	RNC	--	--	--
Bnascaffold0026G0038400ZS	N_WCS417_30m	N_Control	1511.11	2561.52	2036.32	-0.760996	0.0908893	-8.37277	5.62773e-17	1.79596e-15	Normal	N_WCS417_30m-N_Control	RNC	--	--	--
BnaA01G0254700ZS	N_WCS417_30m	N_Control	3414.72	5443.73	4429.23	-0.672632	0.0803613	-8.3701	5.75677e-17	1.83589e-15	Normal	N_WCS417_30m-N_Control	RNC	--	--	--
Bnascaffold0060G0000500ZS	N_WCS417_30m	N_Control	1370.79	2434.9	1902.84	-0.828437	0.0990115	-8.36707	5.90676e-17	1.88244e-15	Normal	N_WCS417_30m-N_Control	RNC	--	--	--
Bnascaffold0026G0007300ZS	N_WCS417_30m	N_Control	1108.21	1931.26	1519.73	-0.801572	0.0958691	-8.36111	6.21305e-17	1.97871e-15	Normal	N_WCS417_30m-N_Control	RNC	--	--	--
BnaA05G0301700ZS	N_WCS417_30m	N_Control	642.013	1261.86	951.937	-0.974496	0.116566	-8.36003	6.2702e-17	1.99555e-15	Normal	N_WCS417_30m-N_Control	RNC	--	--	--
Bnascaffold0027G0060400ZS	N_WCS417_30m	N_Control	1087.73	1966.85	1527.29	-0.854156	0.102201	-8.35763	6.39887e-17	2.03512e-15	Normal	N_WCS417_30m-N_Control	RNC	--	--	--
BnaA01G0013200ZS	N_WCS417_30m	N_Control	353.627	85.9873	219.807	2.03771	0.24383	8.35709	6.42848e-17	2.04315e-15	Up	N_WCS417_30m-N_Control	RNC	AT4G37610	BT5	BTB and TAZ domain protein. Located in cytoplasm and expressed in fruit, flower and leaves.
BnaC01G0134600ZS	N_WCS417_30m	N_Control	2077.81	1203.99	1640.9	0.786715	0.0941489	8.35607	6.48424e-17	2.05947e-15	Normal	N_WCS417_30m-N_Control	RNC	AT4G20830	OGOX1	FAD-binding Berberine family protein
BnaA09G0283300ZS	N_WCS417_30m	N_Control	861.629	1740	1300.82	-1.01443	0.121432	-8.35392	6.60355e-17	2.09595e-15	Down	N_WCS417_30m-N_Control	RNC	--	--	--
Bnascaffold0044G0000400ZS	N_WCS417_30m	N_Control	1365.52	2444.4	1904.96	-0.839708	0.100528	-8.35297	6.65695e-17	2.11146e-15	Normal	N_WCS417_30m-N_Control	RNC	--	--	--
BnaC04G0407900ZS	N_WCS417_30m	N_Control	583.269	212.601	397.935	1.45639	0.174397	8.35099	6.76947e-17	2.1457e-15	Up	N_WCS417_30m-N_Control	RNC	AT5G40780	LHT1	Encodes LHT1 (lysine histidine transporter), a high-affinity transporter for cellular amino acid uptake in both root epidermis and leaf mesophyll.
Bnascaffold2992G0000100ZS	N_WCS417_30m	N_Control	660.645	1281.17	970.909	-0.955372	0.114442	-8.34809	6.9373e-17	2.19741e-15	Normal	N_WCS417_30m-N_Control	RNC	--	--	--
BnaC01G0491500ZS	N_WCS417_30m	N_Control	750.397	311.152	530.774	1.27069	0.152229	8.34721	6.98924e-17	2.21236e-15	Up	N_WCS417_30m-N_Control	RNC	AT3G07090	Desi1	PPPDE putative thiol peptidase family protein
BnaA09G0593900ZS	N_WCS417_30m	N_Control	622.351	218.382	420.366	1.51274	0.181312	8.34332	7.22342e-17	2.28495e-15	Up	N_WCS417_30m-N_Control	RNC	AT2G22250	PAT	Encodes a prokaryotic-type plastidic aspartate aminotransferase with glutamate/aspartate-prephenate aminotransferase (PAT) activity.
BnaA01G0129800ZS	N_WCS417_30m	N_Control	3716.71	2386.2	3051.46	0.639503	0.0767108	8.33654	7.64989e-17	2.41821e-15	Normal	N_WCS417_30m-N_Control	RNC	AT4G23100	RML1	Encodes the enzyme glutamate-cysteine ligase catalyzing the first, and rate-limiting, step of glutathione biosynthesis. Required for cell proliferation at the root tip. Involved in susceptibility to the bacterial pathogen Pseudomonas syringae. Mutants are phytoalexin defective.
BnaA04G0064400ZS	N_WCS417_30m	N_Control	668.083	253.057	460.57	1.40206	0.168192	8.33606	7.68079e-17	2.42634e-15	Up	N_WCS417_30m-N_Control	RNC	AT3G52430	PAD4	Encodes a lipase-like gene that is important for salicylic acid signaling and function in resistance (R) gene-mediated and basal plant disease resistance. PAD4 can interact directly with EDS1, another disease resistance signaling protein. Expressed at elevated level in response to green peach aphid (GPA) feeding, and modulates the GPA feeding-induced leaf senescence through a mechanism that doesn…
BnaC04G0476800ZS	N_WCS417_30m	N_Control	1710.82	924.191	1317.5	0.889161	0.106723	8.33151	7.98187e-17	2.51975e-15	Normal	N_WCS417_30m-N_Control	RNC	AT3G57020	--	Calcium-dependent phosphotriesterase superfamily protein
BnaC05G0475300ZS	N_WCS417_30m	N_Control	1961.85	1125.07	1543.46	0.801666	0.096235	8.3303	8.06404e-17	2.54398e-15	Normal	N_WCS417_30m-N_Control	RNC	AT3G12740	ALIS1	Physically interacts with ALA3, and is required for the phospholipid translocase activity of ALA3.
BnaC09G0029800ZS	N_WCS417_30m	N_Control	624.758	229.459	427.109	1.44632	0.173651	8.3289	8.16002e-17	2.57252e-15	Up	N_WCS417_30m-N_Control	RNC	AT3G29200	CM1	L-ascorbate peroxidase
BnaA06G0285800ZS	N_WCS417_30m	N_Control	172.297	14.1985	93.2478	3.60077	0.432476	8.32594	8.36652e-17	2.63585e-15	Up	N_WCS417_30m-N_Control	RNC	AT5G63450	CYP94B1	member of CYP94B
BnaA02G0110300ZS	N_WCS417_30m	N_Control	582.986	1180.22	881.602	-1.01779	0.122272	-8.32397	8.50635e-17	2.6781e-15	Down	N_WCS417_30m-N_Control	RNC	AT5G58430	EXO70B1	A member of EXO70 gene family, putative exocyst subunits, conserved in land plants. Arabidopsis thaliana contains 23 putative EXO70 genes, which can be classified into eight clusters on the phylogenetic tree.
BnaA02G0159800ZS	N_WCS417_30m	N_Control	176.515	12.6415	94.5785	3.81452	0.458288	8.32343	8.54557e-17	2.68864e-15	Up	N_WCS417_30m-N_Control	RNC	AT1G07440	--	NAD(P)-binding Rossmann-fold superfamily protein
BnaC07G0319400ZS	N_WCS417_30m	N_Control	401.344	112.827	257.086	1.82976	0.219853	8.32265	8.60204e-17	2.70459e-15	Up	N_WCS417_30m-N_Control	RNC	AT3G29240	DUF179-3	Protein of unknown function (DUF179)
BnaC03G0804000ZS	N_WCS417_30m	N_Control	447.258	134.57	290.914	1.73235	0.208222	8.31976	8.81396e-17	2.76936e-15	Up	N_WCS417_30m-N_Control	RNC	AT1G54050	HSP17.4B	HSP20-like chaperones superfamily protein
BnaC07G0383600ZS	N_WCS417_30m	N_Control	377.319	870.902	624.111	-1.20628	0.145156	-8.31023	9.55136e-17	2.99703e-15	Down	N_WCS417_30m-N_Control	RNC	AT5G61600	ERF104	encodes a member of the ERF (ethylene response factor) subfamily B-3 of ERF/AP2 transcription factor family. The protein contains one AP2 domain. There are 18 members in this subfamily including ATERF-1, ATERF-2, AND ATERF-5.
BnaA09G0342000ZS	N_WCS417_30m	N_Control	884.009	1610.05	1247.03	-0.865238	0.104123	-8.30975	9.59027e-17	3.00722e-15	Normal	N_WCS417_30m-N_Control	RNC	--	--	--
Bnascaffold0554G0000100ZS	N_WCS417_30m	N_Control	1249.96	2137.24	1693.6	-0.773599	0.0931141	-8.30807	9.72682e-17	3.048e-15	Normal	N_WCS417_30m-N_Control	RNC	--	--	--
BnaC08G0105800ZS	N_WCS417_30m	N_Control	316.842	755.749	536.295	-1.25452	0.151054	-8.30511	9.97293e-17	3.12303e-15	Down	N_WCS417_30m-N_Control	RNC	AT1G32920	--	--
BnaA09G0329600ZS	N_WCS417_30m	N_Control	426.581	943.436	685.009	-1.14576	0.138049	-8.29962	1.04442e-16	3.26841e-15	Down	N_WCS417_30m-N_Control	RNC	--	--	--
Bnascaffold0313G0000300ZS	N_WCS417_30m	N_Control	636.344	239.74	438.042	1.40956	0.169918	8.29554	1.08093e-16	3.3804e-15	Up	N_WCS417_30m-N_Control	RNC	AT3G10300	--	Calcium-binding EF-hand family protein
BnaA09G0340400ZS	N_WCS417_30m	N_Control	320.003	771.035	545.519	-1.26937	0.153034	-8.29474	1.08821e-16	3.40092e-15	Down	N_WCS417_30m-N_Control	RNC	--	--	--
Bnascaffold1635G0001100ZS	N_WCS417_30m	N_Control	1126.9	2007.31	1567.11	-0.83281	0.100421	-8.29323	1.10216e-16	3.43846e-15	Normal	N_WCS417_30m-N_Control	RNC	--	--	--
BnaC01G0032500ZS	N_WCS417_30m	N_Control	195.445	22.0336	108.739	3.14488	0.379212	8.2932	1.10239e-16	3.43846e-15	Up	N_WCS417_30m-N_Control	RNC	AT4G35770	SEN1	Senescence-associated gene that is strongly induced by phosphate starvation. Transcripts are differentially regulated at the level of mRNA stability at different times of day. mRNAs are targets of the mRNA degradation pathway mediated by the downstream (DST) instability determinant.
BnaC09G0521700ZS	N_WCS417_30m	N_Control	524.698	1082.52	803.61	-1.04432	0.125925	-8.2932	1.10243e-16	3.43846e-15	Down	N_WCS417_30m-N_Control	RNC	AT5G14000	NAC084	NAC domain containing protein 84
BnaC03G0147500ZS	N_WCS417_30m	N_Control	3894.55	2548.94	3221.75	0.611726	0.0737792	8.29131	1.12007e-16	3.49117e-15	Normal	N_WCS417_30m-N_Control	RNC	AT5G54160	OMT3	A caffeic acid/5-hydroxyferulic acid O-methyltransferase. Interacts with 14-4-3 proteins in yeast 2 hybrid assay. AtOMT1 (At5g54160) encodes a flavonol 3锟?O-methyltransferase that is highly active towards quercetin and myricetin. The substrate specificity identifies the enzyme as flavonol 3锟?methyltransferase which replaces the former annotation of the gene to encode a caffeic acid/5-hydroxyferul…
BnaA09G0351700ZS	N_WCS417_30m	N_Control	2839.88	4587.54	3713.71	-0.691639	0.0834335	-8.28971	1.13527e-16	3.53618e-15	Normal	N_WCS417_30m-N_Control	RNC	--	--	--
BnaA06G0235800ZS	N_WCS417_30m	N_Control	323.519	781.06	552.289	-1.27234	0.153527	-8.28738	1.15767e-16	3.60355e-15	Down	N_WCS417_30m-N_Control	RNC	--	--	--
Bnascaffold1763G0001000ZS	N_WCS417_30m	N_Control	1056.99	1866.67	1461.83	-0.820571	0.099021	-8.28684	1.16298e-16	3.61769e-15	Normal	N_WCS417_30m-N_Control	RNC	--	--	--
BnaA08G0290700ZS	N_WCS417_30m	N_Control	381.589	99.5104	240.55	1.93662	0.233761	8.28461	1.18494e-16	3.68354e-15	Up	N_WCS417_30m-N_Control	RNC	AT1G10090	--	Early-responsive to dehydration stress protein (ERD4)
BnaC01G0084800ZS	N_WCS417_30m	N_Control	5898.5	8149.54	7024.02	-0.466417	0.0563228	-8.28113	1.22016e-16	3.79052e-15	Normal	N_WCS417_30m-N_Control	RNC	AT4G30190	PMA2	belongs to the P-type ATPase superfamily of cation-transporting ATPases, pumps protons out of the cell, generating a proton gradient that drives the active transport of nutrients by proton symport. has two autoinhibitory regions within the C-terminal dom
Bnascaffold1763G0000700ZS	N_WCS417_30m	N_Control	1019.01	1795.58	1407.29	-0.81716	0.0987124	-8.27819	1.25063e-16	3.88261e-15	Normal	N_WCS417_30m-N_Control	RNC	--	--	--
BnaC05G0096000ZS	N_WCS417_30m	N_Control	151.244	464.47	307.857	-1.61834	0.195527	-8.27682	1.26508e-16	3.92485e-15	Down	N_WCS417_30m-N_Control	RNC	AT1G13260	RAV1	Encodes an AP2/B3 domain transcription factor which is upregulated in response to low temperature. It contains a B3 DNA binding domain. It has circadian regulation and may function as a negative growth regulator.
Bnascaffold0418G0000200ZS	N_WCS417_30m	N_Control	922.984	1647.68	1285.33	-0.835864	0.101032	-8.27323	1.30374e-16	4.04211e-15	Normal	N_WCS417_30m-N_Control	RNC	AT3G45640	MPK3	Encodes a mitogen-activated kinase whose mRNA levels increase in response to touch, cold, salinity stress and chitin oligomers.Also functions in ovule development. Heterozygous MPK3 mutants in a homozygous MPK6 background are female sterile due to defects in integument development. MPK3 can be dephosphorylated by MKP2 in vitro.
BnaA01G0338800ZS	N_WCS417_30m	N_Control	421.405	925.371	673.388	-1.1346	0.137249	-8.26673	1.37686e-16	4.26598e-15	Down	N_WCS417_30m-N_Control	RNC	AT3G16860	COBL8	COBRA-like protein 8 precursor
BnaC01G0240100ZS	N_WCS417_30m	N_Control	8947.86	12120.2	10534	-0.437717	0.0529613	-8.26485	1.39866e-16	4.33067e-15	Normal	N_WCS417_30m-N_Control	RNC	AT4G16260	--	Encodes a putative beta-1,3-endoglucanase that interacts with the 30C02 cyst nematode effector. May play a role in host defense.
BnaC01G0104900ZS	N_WCS417_30m	N_Control	1947.97	3101.11	2524.54	-0.67109	0.0812093	-8.26371	1.41215e-16	4.36953e-15	Normal	N_WCS417_30m-N_Control	RNC	AT4G17500	ERF1A	Encodes a member of the ERF (ethylene response factor) subfamily B-3 of ERF/AP2 transcription factor family (ATERF-1). The protein contains one AP2 domain. There are 18 members in this subfamily including ATERF-1, ATERF-2, AND ATERF-5.
BnaC01G0510700ZS	N_WCS417_30m	N_Control	314.369	71.6681	193.019	2.13405	0.258331	8.26093	1.44547e-16	4.46969e-15	Up	N_WCS417_30m-N_Control	RNC	AT3G04070	SHYG	NAC domain containing protein 47
BnaA05G0211500ZS	N_WCS417_30m	N_Control	884.3	1608.66	1246.48	-0.863464	0.104528	-8.26059	1.44957e-16	4.47942e-15	Normal	N_WCS417_30m-N_Control	RNC	--	--	--
BnaC08G0500400ZS	N_WCS417_30m	N_Control	1314.17	679.829	997	0.950265	0.115156	8.25198	1.55789e-16	4.81097e-15	Normal	N_WCS417_30m-N_Control	RNC	AT1G13210	ALA11	autoinhibited Ca2+/ATPase II
Bnascaffold0043G0001000ZS	N_WCS417_30m	N_Control	1300.24	2313.02	1806.63	-0.830518	0.100656	-8.25103	1.57031e-16	4.84611e-15	Normal	N_WCS417_30m-N_Control	RNC	--	--	--
BnaA03G0542000ZS	N_WCS417_30m	N_Control	347.261	800.2	573.731	-1.20448	0.146048	-8.24718	1.6218e-16	5.00173e-15	Down	N_WCS417_30m-N_Control	RNC	AT4G34150	--	Calcium-dependent lipid-binding (CaLB domain) family protein
Bnascaffold0295G0000400ZS	N_WCS417_30m	N_Control	931.886	1658.06	1294.97	-0.831242	0.100859	-8.24164	1.6987e-16	5.23545e-15	Normal	N_WCS417_30m-N_Control	RNC	--	--	--
BnaA05G0203600ZS	N_WCS417_30m	N_Control	612.935	1204.12	908.525	-0.973844	0.118169	-8.2411	1.70633e-16	5.25549e-15	Normal	N_WCS417_30m-N_Control	RNC	--	--	--
Bnascaffold0034G0000900ZS	N_WCS417_30m	N_Control	2088.65	3489.77	2789.21	-0.740202	0.0898292	-8.2401	1.72065e-16	5.29612e-15	Normal	N_WCS417_30m-N_Control	RNC	--	--	--
BnaA09G0015100ZS	N_WCS417_30m	N_Control	706.355	287.348	496.851	1.2984	0.15769	8.23389	1.81235e-16	5.57471e-15	Up	N_WCS417_30m-N_Control	RNC	AT4G01250	WRKY22	AtWRKY22 is a member of WRKY Transcription Factor; Group II-e. It is involved in regulation of dark induced leaf senescence.
BnaA09G0056000ZS	N_WCS417_30m	N_Control	442.139	136.511	289.325	1.69626	0.206024	8.23332	1.82099e-16	5.59761e-15	Up	N_WCS417_30m-N_Control	RNC	AT5G27380	GSHB	Encodes a protein with similarity to glutathione synthetases, which catalyzes one of the early steps in glutathione biosynthesis. Two transcripts have been detected; the longer transcript is less abundant and the protein is localized to the chloroplast. The smaller transcript, in which the transit peptide is truncated, is localized to the cytosol.
BnaC07G0477700ZS	N_WCS417_30m	N_Control	193.198	558.029	375.614	-1.5315	0.186131	-8.22806	1.90267e-16	5.84485e-15	Down	N_WCS417_30m-N_Control	RNC	AT4G27657	--	--
BnaA06G0303500ZS	N_WCS417_30m	N_Control	3674.59	5413.17	4543.88	-0.558755	0.0679507	-8.22295	1.98552e-16	6.09535e-15	Normal	N_WCS417_30m-N_Control	RNC	AT5G10450	GRF6	Encodes a member of the 14-3-3 gene family that is a lambda isoform (14-3-3&#955;). Interacts with APX3 (ascorbate peroxidase) and AKR2 , suggesting a role in mediating oxidative metabolism in stress response. This protein was shown to colocalize and interact with SERK1 by which it is phosphorylated. This protein is also reported to interact with the phosphorylated form of the BZR1 transcription …
BnaA07G0210000ZS	N_WCS417_30m	N_Control	18.9145	171.392	95.1531	-3.17786	0.386823	-8.21529	2.11644e-16	6.493e-15	Down	N_WCS417_30m-N_Control	RNC	AT3G59900	ARGOS	Encodes ARGOS (Auxin-Regulated Gene Involved in Organ Size). Inducible by auxin. Involved in lateral organ size control. Transgenic plants expressing sense or antisense ARGOS cDNA display enlarged or reduced aerial organs, respectively. The alteration in organ size is attributable mainly to changes in cell number and the duration of organ growth.
Bnascaffold0549G0000100ZS	N_WCS417_30m	N_Control	561.897	1116.55	839.223	-0.990689	0.12062	-8.2133	2.15184e-16	6.59728e-15	Normal	N_WCS417_30m-N_Control	RNC	--	--	--
BnaC09G0073400ZS	N_WCS417_30m	N_Control	1292.22	667.892	980.055	0.952801	0.116012	8.21296	2.15808e-16	6.61208e-15	Normal	N_WCS417_30m-N_Control	RNC	AT5G62890	--	Xanthine/uracil permease family protein
BnaC04G0597700ZS	N_WCS417_30m	N_Control	1615.01	2593.39	2104.2	-0.683494	0.0832422	-8.2109	2.1953e-16	6.72174e-15	Normal	N_WCS417_30m-N_Control	RNC	AT2G43910	HOL1	HARMLESS TO OZONE LAYER 1
BnaA05G0074900ZS	N_WCS417_30m	N_Control	1084.33	533.813	809.069	1.02243	0.12456	8.20831	2.24321e-16	6.86394e-15	Up	N_WCS417_30m-N_Control	RNC	AT2G37970	SOUL2	SOUL heme-binding family protein
BnaC07G0519100ZS	N_WCS417_30m	N_Control	881.275	393.776	637.526	1.16307	0.141812	8.20153	2.3735e-16	7.25785e-15	Up	N_WCS417_30m-N_Control	RNC	AT4G34200	PGDH1	Encodes a 3-phosphoglycerate dehydrogenase that is essential for embryo and pollen development.
BnaC01G0134200ZS	N_WCS417_30m	N_Control	449.854	126.649	288.251	1.82811	0.222916	8.20089	2.38623e-16	7.29201e-15	Up	N_WCS417_30m-N_Control	RNC	AT4G20780	CML42	Calcium sensor involved in trichome branching.
BnaC02G0428400ZS	N_WCS417_30m	N_Control	76.4553	324.376	200.416	-2.08326	0.25404	-8.2005	2.39391e-16	7.31073e-15	Down	N_WCS417_30m-N_Control	RNC	AT2G01610	--	Plant invertase/pectin methylesterase inhibitor superfamily protein
BnaC04G0571000ZS	N_WCS417_30m	N_Control	1348.59	2240.58	1794.58	-0.732282	0.089316	-8.19877	2.42851e-16	7.41154e-15	Normal	N_WCS417_30m-N_Control	RNC	AT2G40000	HSPRO2	ortholog of sugar beet HS1 PRO-1 2
BnaC08G0533800ZS	N_WCS417_30m	N_Control	4676.98	3212.33	3944.65	0.542027	0.0661271	8.19675	2.46971e-16	7.53237e-15	Normal	N_WCS417_30m-N_Control	RNC	AT1G07890	MEE6	Encodes a cytosolic ascorbate peroxidase APX1. Ascorbate peroxidases are enzymes that scavenge hydrogen peroxide in plant cells. Eight types of APX have been described for Arabidopsis: three cytosolic (APX1, APX2, APX6), two chloroplastic types (stromal sAPX, thylakoid tAPX), and three microsomal (APX3, APX4, APX5) isoforms. At least part of the induction of heat shock proteins during light stres…
BnaA02G0264200ZS	N_WCS417_30m	N_Control	452.527	131.235	291.881	1.78419	0.217692	8.19596	2.48598e-16	7.57707e-15	Up	N_WCS417_30m-N_Control	RNC	AT4G12090	--	Cornichon family protein
BnaA06G0247500ZS	N_WCS417_30m	N_Control	578.985	1166.1	872.542	-1.01044	0.123318	-8.19373	2.53258e-16	7.71407e-15	Down	N_WCS417_30m-N_Control	RNC	--	--	--
BnaA01G0030700ZS	N_WCS417_30m	N_Control	1743.45	991.586	1367.52	0.814389	0.0994368	8.19002	2.6118e-16	7.95019e-15	Normal	N_WCS417_30m-N_Control	RNC	AT4G35310	CPK5	calmodulin-domain protein kinase CDPK isoform 5 (CPK5)
BnaC01G0510100ZS	N_WCS417_30m	N_Control	486.144	145.092	315.618	1.7418	0.212749	8.18712	2.67555e-16	8.13399e-15	Up	N_WCS417_30m-N_Control	RNC	AT3G03990	D14	alpha/beta-Hydrolases superfamily protein
BnaC09G0235300ZS	N_WCS417_30m	N_Control	341.723	84.9777	213.35	2.00607	0.245027	8.18711	2.67565e-16	8.13399e-15	Up	N_WCS417_30m-N_Control	RNC	AT3G11170	FADD	Chloroplastic enzyme responsible for the synthesis of 16:3 and 18:3 fatty acids from galactolipids, sulpholipids and phosphatidylglycerol. Uses ferredoxin as electron donor. Gene expression is induced by wounding in shoot and root. The wound-response in shoot is independent of jasmonic acid mediated pathway whereas the root response is mediated by jasmonic acid.
BnaC03G0422100ZS	N_WCS417_30m	N_Control	1482.51	809.657	1146.08	0.872867	0.106656	8.18391	2.74778e-16	8.34784e-15	Normal	N_WCS417_30m-N_Control	RNC	AT3G17390	SAMS3	S-adenosylmethionine synthetase
BnaA04G0183300ZS	N_WCS417_30m	N_Control	365.335	818.537	591.936	-1.16376	0.142229	-8.18231	2.78449e-16	8.45388e-15	Down	N_WCS417_30m-N_Control	RNC	AT2G28400	--	Protein of unknown function, DUF584
BnaC05G0170400ZS	N_WCS417_30m	N_Control	194.741	21.1947	107.968	3.20682	0.392006	8.18055	2.82562e-16	8.57317e-15	Up	N_WCS417_30m-N_Control	RNC	AT1G20070	--	--
BnaA09G0284500ZS	N_WCS417_30m	N_Control	720.942	1355	1037.97	-0.910698	0.111355	-8.17831	2.87855e-16	8.72812e-15	Normal	N_WCS417_30m-N_Control	RNC	--	--	--
Bnascaffold0216G0000100ZS	N_WCS417_30m	N_Control	825.118	1535.05	1180.09	-0.895112	0.109486	-8.17557	2.94472e-16	8.92297e-15	Normal	N_WCS417_30m-N_Control	RNC	--	--	--
BnaA05G0275500ZS	N_WCS417_30m	N_Control	1218.03	2059.01	1638.52	-0.757124	0.09261	-8.17541	2.94868e-16	8.92921e-15	Normal	N_WCS417_30m-N_Control	RNC	--	--	--
BnaC06G0358800ZS	N_WCS417_30m	N_Control	3077.18	1883.74	2480.46	0.707927	0.0865946	8.17518	2.95416e-16	8.94e-15	Normal	N_WCS417_30m-N_Control	RNC	AT1G33590	--	Leucine-rich repeat (LRR) family protein
Bnascaffold0027G0037100ZS	N_WCS417_30m	N_Control	660.123	1326.43	993.278	-1.00721	0.123492	-8.15608	3.46067e-16	1.04661e-14	Down	N_WCS417_30m-N_Control	RNC	--	--	--
BnaA05G0217000ZS	N_WCS417_30m	N_Control	606.794	1188.05	897.42	-0.968957	0.118827	-8.15433	3.51123e-16	1.06121e-14	Normal	N_WCS417_30m-N_Control	RNC	--	--	--
Bnascaffold0269G0000300ZS	N_WCS417_30m	N_Control	1251.1	2172.64	1711.87	-0.796076	0.0976407	-8.15312	3.54649e-16	1.07118e-14	Normal	N_WCS417_30m-N_Control	RNC	--	--	--
BnaA01G0343300ZS	N_WCS417_30m	N_Control	2129.08	3274.77	2701.92	-0.621333	0.0762175	-8.1521	3.57662e-16	1.07958e-14	Normal	N_WCS417_30m-N_Control	RNC	AT3G16150	ASPGB1	Encodes an asparaginase that catalyzes the degradation of L-asparagine to L-aspartic acid and ammonia.
BnaC04G0149000ZS	N_WCS417_30m	N_Control	1487.61	217.216	852.412	2.77695	0.340673	8.15134	3.599e-16	1.08564e-14	Up	N_WCS417_30m-N_Control	RNC	AT2G32150	XMPP	Haloacid dehalogenase-like hydrolase (HAD) superfamily protein
BnaC01G0249400ZS	N_WCS417_30m	N_Control	330.717	764.907	547.812	-1.20937	0.148391	-8.14989	3.64257e-16	1.09807e-14	Down	N_WCS417_30m-N_Control	RNC	AT3G30280	--	HXXXD-type acyl-transferase family protein
BnaC05G0107000ZS	N_WCS417_30m	N_Control	329.195	72.6422	200.918	2.18415	0.268131	8.14584	3.76668e-16	1.13475e-14	Up	N_WCS417_30m-N_Control	RNC	AT1G13560	ATAAPT1	Encodes aminoalcoholphosphotransferase AAPT1.
Bnascaffold1763G0000400ZS	N_WCS417_30m	N_Control	903.611	1663.71	1283.66	-0.880187	0.108086	-8.1434	3.84328e-16	1.15709e-14	Normal	N_WCS417_30m-N_Control	RNC	--	--	--
BnaC07G0405300ZS	N_WCS417_30m	N_Control	887.758	403.886	645.822	1.1367	0.139687	8.13749	4.03541e-16	1.21415e-14	Up	N_WCS417_30m-N_Control	RNC	AT4G12720	NUDT7	Encodes a protein with ADP-ribose hydrolase activity. Negatively regulates EDS1-conditioned plant defense and programmed cell death.
BnaA05G0083500ZS	N_WCS417_30m	N_Control	4774.78	3278.04	4026.41	0.542789	0.066703	8.1374	4.0387e-16	1.21436e-14	Normal	N_WCS417_30m-N_Control	RNC	AT2G36880	MAT3	methionine adenosyltransferase 3
Bnascaffold3141G0000100ZS	N_WCS417_30m	N_Control	865.798	1546.96	1206.38	-0.837501	0.102923	-8.13714	4.04739e-16	1.21619e-14	Normal	N_WCS417_30m-N_Control	RNC	--	--	--
BnaC05G0105600ZS	N_WCS417_30m	N_Control	1077.28	493.471	785.376	1.12496	0.13838	8.12951	4.3104e-16	1.29439e-14	Up	N_WCS417_30m-N_Control	RNC	AT1G11960	OSCA1.3	ERD (early-responsive to dehydration stress) family protein
BnaC06G0342300ZS	N_WCS417_30m	N_Control	383.423	841.04	612.232	-1.13344	0.13944	-8.12855	4.34472e-16	1.30386e-14	Down	N_WCS417_30m-N_Control	RNC	AT1G67810	SUFE2	Encodes a protein capable of stimulating the cysteine desulfurase activity of CpNifS (AT1G08490) in vitro. SufE2:GFP localizes to the chloroplasts where it is likely to play a role in iron-sulfur cluster assembly. Transcript levels for this gene are high in the pollen relative to other organs based on RT-PCR analysis.
BnaA09G0664400ZS	N_WCS417_30m	N_Control	274.692	48.4042	161.548	2.49881	0.307424	8.12823	4.35599e-16	1.30641e-14	Up	N_WCS417_30m-N_Control	RNC	AT1G08860	BON3	Encodes a copine-like protein, which is a member of a newly identified class of calcium-dependent, phospholipid binding proteins that are present in a wide range of organisms. Overexpression of this gene suppresses bon1-1 phenotypes. Double mutant analyses with bon1-1 suggest that BON1 and BON3 have overlapping functions in maintaining cellular homeostasis and inhibiting cell death.
BnaA01G0293200ZS	N_WCS417_30m	N_Control	553.371	1109.56	831.466	-1.00321	0.123458	-8.12589	4.44087e-16	1.33101e-14	Down	N_WCS417_30m-N_Control	RNC	AT3G23250	MYB15	Member of the R2R3 factor gene family.
BnaA05G0261700ZS	N_WCS417_30m	N_Control	770.596	1452.49	1111.54	-0.91461	0.112753	-8.11164	4.99419e-16	1.49589e-14	Normal	N_WCS417_30m-N_Control	RNC	--	--	--
BnaA09G0341400ZS	N_WCS417_30m	N_Control	501.281	1051.67	776.476	-1.0683	0.131722	-8.11026	5.05098e-16	1.51193e-14	Down	N_WCS417_30m-N_Control	RNC	--	--	--
BnaA06G0237200ZS	N_WCS417_30m	N_Control	143.849	451.622	297.736	-1.65111	0.203719	-8.10482	5.28252e-16	1.58023e-14	Down	N_WCS417_30m-N_Control	RNC	--	--	--
BnaC05G0490400ZS	N_WCS417_30m	N_Control	379.225	107.31	243.268	1.82112	0.224812	8.10064	5.46706e-16	1.63439e-14	Up	N_WCS417_30m-N_Control	RNC	AT3G11170	FADD	Chloroplastic enzyme responsible for the synthesis of 16:3 and 18:3 fatty acids from galactolipids, sulpholipids and phosphatidylglycerol. Uses ferredoxin as electron donor. Gene expression is induced by wounding in shoot and root. The wound-response in shoot is independent of jasmonic acid mediated pathway whereas the root response is mediated by jasmonic acid.
BnaA05G0252200ZS	N_WCS417_30m	N_Control	1441.06	2527.95	1984.51	-0.810534	0.100106	-8.09677	5.64375e-16	1.68614e-14	Normal	N_WCS417_30m-N_Control	RNC	--	--	--
BnaC09G0039300ZS	N_WCS417_30m	N_Control	703.093	292.353	497.723	1.26566	0.156358	8.09466	5.74268e-16	1.7146e-14	Up	N_WCS417_30m-N_Control	RNC	AT3G04320	--	Kunitz family trypsin and protease inhibitor protein
BnaA01G0160600ZS	N_WCS417_30m	N_Control	1117.92	1895.34	1506.63	-0.761699	0.094106	-8.09405	5.77141e-16	1.72116e-14	Normal	N_WCS417_30m-N_Control	RNC	AT4G26630	DEK3	DEK domain-containing chromatin associated protein
BnaA01G0040800ZS	N_WCS417_30m	N_Control	3492.99	5011.16	4252.07	-0.520646	0.0643247	-8.09404	5.77201e-16	1.72116e-14	Normal	N_WCS417_30m-N_Control	RNC	AT4G34110	PABP2	Putative poly-A binding protein. Member of a gene family .Expressed in stele and root meristem and post-fertilization ovules.Member of the class II family of PABP proteins.
BnaA09G0278600ZS	N_WCS417_30m	N_Control	741.74	1420.62	1081.18	-0.937547	0.115921	-8.08778	6.07596e-16	1.81064e-14	Normal	N_WCS417_30m-N_Control	RNC	--	--	--
BnaC02G0100500ZS	N_WCS417_30m	N_Control	562.919	179.668	371.294	1.65061	0.204141	8.08564	6.18398e-16	1.84166e-14	Up	N_WCS417_30m-N_Control	RNC	AT5G20250	RS6	encodes a member of glycosyl hydrolase family 36. Expression is induced within 3 hours of dark treatment, in senescing leaves and treatment with exogenous photosynthesis inhibitor. Induction of gene expression was suppressed in excised leaves supplied with sugar. The authors suggest that the gene's expression pattern is responding to the level of sugar in the cell.
BnaC05G0251200ZS	N_WCS417_30m	N_Control	23.7574	181.63	102.694	-2.93603	0.363132	-8.08529	6.20156e-16	1.84572e-14	Down	N_WCS417_30m-N_Control	RNC	AT2G42760	--	--
Bnascaffold0027G0036700ZS	N_WCS417_30m	N_Control	898.995	1619.53	1259.26	-0.849683	0.105136	-8.08172	6.38619e-16	1.89947e-14	Normal	N_WCS417_30m-N_Control	RNC	--	--	--
Bnascaffold0043G0000400ZS	N_WCS417_30m	N_Control	882.263	1593.95	1238.11	-0.853566	0.105634	-8.08042	6.45436e-16	1.91852e-14	Normal	N_WCS417_30m-N_Control	RNC	--	--	--
BnaA03G0518400ZS	N_WCS417_30m	N_Control	2297.18	3476.75	2886.96	-0.598017	0.0740478	-8.0761	6.68724e-16	1.98648e-14	Normal	N_WCS417_30m-N_Control	RNC	AT4G30440	GAE1	UDP-D-glucuronate 4-epimerase
BnaA09G0642500ZS	N_WCS417_30m	N_Control	1064	525.971	794.985	1.01596	0.125857	8.07233	6.89685e-16	2.04745e-14	Up	N_WCS417_30m-N_Control	RNC	AT1G13210	ALA11	autoinhibited Ca2+/ATPase II
Bnascaffold2068G0000200ZS	N_WCS417_30m	N_Control	932.11	1645.34	1288.72	-0.819685	0.101554	-8.07145	6.94709e-16	2.06106e-14	Normal	N_WCS417_30m-N_Control	RNC	--	--	--
Bnascaffold0042G0000700ZS	N_WCS417_30m	N_Control	922.446	1653.53	1287.99	-0.842014	0.10439	-8.06603	7.26204e-16	2.15313e-14	Normal	N_WCS417_30m-N_Control	RNC	--	--	--
Bnascaffold0027G0028100ZS	N_WCS417_30m	N_Control	1026.97	1762.1	1394.54	-0.778842	0.0966532	-8.05811	7.7486e-16	2.29594e-14	Normal	N_WCS417_30m-N_Control	RNC	--	--	--
Bnascaffold0040G0000700ZS	N_WCS417_30m	N_Control	822.887	1480.71	1151.8	-0.847345	0.105165	-8.0573	7.79973e-16	2.30963e-14	Normal	N_WCS417_30m-N_Control	RNC	--	--	--
BnaC06G0001400ZS	N_WCS417_30m	N_Control	723.269	1373.59	1048.43	-0.925044	0.114854	-8.05408	8.00817e-16	2.36985e-14	Normal	N_WCS417_30m-N_Control	RNC	--	--	--
BnaC06G0365100ZS	N_WCS417_30m	N_Control	1502.87	837.712	1170.29	0.8432	0.104727	8.05145	8.18186e-16	2.41972e-14	Normal	N_WCS417_30m-N_Control	RNC	AT1G69920	GSTU12	Encodes glutathione transferase belonging to the tau class of GSTs. Naming convention according to Wagner et al. (2002).
Bnascaffold0026G0066700ZS	N_WCS417_30m	N_Control	458.9	950.796	704.848	-1.05112	0.130583	-8.04944	8.31707e-16	2.45816e-14	Down	N_WCS417_30m-N_Control	RNC	--	--	--
BnaA10G0223600ZS	N_WCS417_30m	N_Control	146.067	7.33032	76.6988	4.30902	0.535405	8.04814	8.40598e-16	2.48287e-14	Up	N_WCS417_30m-N_Control	RNC	AT5G13220	TIFY9	Encodes JAZ10, a member of the JASMONATE ZIM-domain (JAZ) proteins acting as repressors of jasmonate (JA) signaling. An alternatively spliced form (JAZ10.4) of JAZ10 lacks the Jas domain.
BnaA09G0419500ZS	N_WCS417_30m	N_Control	248.876	666.392	457.634	-1.42104	0.176603	-8.04651	8.5186e-16	2.51455e-14	Down	N_WCS417_30m-N_Control	RNC	AT4G01360	BPS3	Encodes a protein related to BYPASS1 (BPS1). Regulates production of mobile compound: bps signal.
BnaA08G0113900ZS	N_WCS417_30m	N_Control	6030.54	4251.88	5141.21	0.504358	0.0626961	8.04449	8.66067e-16	2.55487e-14	Normal	N_WCS417_30m-N_Control	RNC	--	--	--
BnaA03G0276700ZS	N_WCS417_30m	N_Control	507.524	166.749	337.136	1.60356	0.199352	8.04386	8.70535e-16	2.56644e-14	Up	N_WCS417_30m-N_Control	RNC	AT4G01010	CNGC13	member of Cyclic nucleotide gated channel family
BnaA03G0284000ZS	N_WCS417_30m	N_Control	1684.17	901.71	1292.94	0.902263	0.112208	8.04096	8.91386e-16	2.62625e-14	Normal	N_WCS417_30m-N_Control	RNC	AT3G01290	HIR2	SPFH/Band 7/PHB domain-containing membrane-associated protein family
Bnascaffold0036G0001000ZS	N_WCS417_30m	N_Control	707.217	1376.02	1041.62	-0.960759	0.119513	-8.03898	9.05897e-16	2.66732e-14	Normal	N_WCS417_30m-N_Control	RNC	--	--	--
BnaA07G0036900ZS	N_WCS417_30m	N_Control	102.09	360.487	231.289	-1.81955	0.226524	-8.03249	9.55139e-16	2.81055e-14	Down	N_WCS417_30m-N_Control	RNC	AT2G16365	PCH1	F-box family protein
BnaA06G0073000ZS	N_WCS417_30m	N_Control	1589.59	897.869	1243.73	0.82384	0.102569	8.03205	9.58551e-16	2.81881e-14	Normal	N_WCS417_30m-N_Control	RNC	AT1G11260	STP1	Encodes a H+/hexose cotransporter.
BnaA09G0381800ZS	N_WCS417_30m	N_Control	423.978	127.907	275.943	1.72717	0.215043	8.03176	9.60818e-16	2.82371e-14	Up	N_WCS417_30m-N_Control	RNC	AT1G33700	--	Beta-glucosidase, GBA2 type family protein
Bnascaffold0027G0069600ZS	N_WCS417_30m	N_Control	847.788	1534.45	1191.12	-0.855666	0.10655	-8.03068	9.69359e-16	2.84702e-14	Normal	N_WCS417_30m-N_Control	RNC	--	--	--
BnaA09G0612100ZS	N_WCS417_30m	N_Control	237.276	607.387	422.331	-1.3554	0.168821	-8.02863	9.85667e-16	2.8931e-14	Down	N_WCS417_30m-N_Control	RNC	AT1G18740	B1L	Protein of unknown function (DUF793)
BnaC02G0021300ZS	N_WCS417_30m	N_Control	256.437	46.8545	151.646	2.45638	0.306367	8.01776	1.0769e-15	3.15889e-14	Up	N_WCS417_30m-N_Control	RNC	AT5G05600	JOX2	2-oxoglutarate (2OG) and Fe(II)-dependent oxygenase superfamily protein
Bnascaffold0027G0033100ZS	N_WCS417_30m	N_Control	854.344	1560	1207.17	-0.868846	0.108427	-8.01316	1.11796e-15	3.2757e-14	Normal	N_WCS417_30m-N_Control	RNC	--	--	--
Bnascaffold0027G0033000ZS	N_WCS417_30m	N_Control	1016.05	1759.58	1387.81	-0.792525	0.0989032	-8.01315	1.11811e-15	3.2757e-14	Normal	N_WCS417_30m-N_Control	RNC	--	--	--
BnaC02G0148700ZS	N_WCS417_30m	N_Control	672.012	1294.91	983.46	-0.946202	0.118104	-8.01164	1.13191e-15	3.31405e-14	Normal	N_WCS417_30m-N_Control	RNC	AT5G57120	--	--
BnaA01G0243800ZS	N_WCS417_30m	N_Control	785.13	1458.83	1121.98	-0.894127	0.111629	-8.00982	1.14876e-15	3.36127e-14	Normal	N_WCS417_30m-N_Control	RNC	--	--	--
BnaA10G0211400ZS	N_WCS417_30m	N_Control	88.9755	341.475	215.225	-1.93926	0.242142	-8.00879	1.15843e-15	3.38746e-14	Down	N_WCS417_30m-N_Control	RNC	AT5G15120	PCO1	Protein of unknown function (DUF1637)
BnaC08G0413200ZS	N_WCS417_30m	N_Control	1080.41	508.012	794.211	1.09002	0.136299	7.99727	1.27208e-15	3.71747e-14	Up	N_WCS417_30m-N_Control	RNC	AT3G62420	BZIP53	Encodes a group-S bZIP transcription factor. Forms heterodimers with group-C bZIP transcription factors. The heterodimers bind to the ACTCAT cis-element of proline dehydrogenase gene.
Bnascaffold0040G0000400ZS	N_WCS417_30m	N_Control	855.698	1532.41	1194.05	-0.840726	0.105133	-7.9968	1.27694e-15	3.72934e-14	Normal	N_WCS417_30m-N_Control	RNC	--	--	--
BnaA05G0224900ZS	N_WCS417_30m	N_Control	718.76	1380.47	1049.62	-0.941973	0.117942	-7.98673	1.3857e-15	4.04444e-14	Normal	N_WCS417_30m-N_Control	RNC	--	--	--
BnaA06G0143200ZS	N_WCS417_30m	N_Control	670.867	1302.26	986.564	-0.95747	0.119972	-7.98075	1.45443e-15	4.24241e-14	Normal	N_WCS417_30m-N_Control	RNC	AT1G20330	SMT2	Encodes a sterol-C24-methyltransferases involved in sterol biosynthesis. Mutants display altered sterol composition, serrated petals and sepals and altered cotyledon vascular patterning as well as ectopic endoreduplication. This suggests that suppression of endoreduplication is important for petal morphogenesis and that normal sterol composition is required for this suppression.
Bnascaffold0043G0000100ZS	N_WCS417_30m	N_Control	959.567	1734.93	1347.25	-0.855034	0.10714	-7.98051	1.45731e-15	4.24815e-14	Normal	N_WCS417_30m-N_Control	RNC	--	--	--
BnaA03G0340700ZS	N_WCS417_30m	N_Control	436.485	933.875	685.18	-1.09749	0.137527	-7.98015	1.46161e-15	4.25804e-14	Down	N_WCS417_30m-N_Control	RNC	AT3G15210	RAP2.5	Encodes a member of the ERF (ethylene response factor) subfamily B-1 of ERF/AP2 transcription factor family (ATERF-4). The protein contains one AP2 domain. Acts as a negative regulator of JA-responsive defense gene expression and resistance to the necrotrophic fungal pathogen Fusarium oxysporum and antagonizes JA inhibition of root elongation.
Bnascaffold0032G0001000ZS	N_WCS417_30m	N_Control	950.227	1712.45	1331.34	-0.849957	0.106579	-7.97493	1.52468e-15	4.43903e-14	Normal	N_WCS417_30m-N_Control	RNC	--	--	--
BnaA02G0383600ZS	N_WCS417_30m	N_Control	519.775	179.184	349.48	1.53597	0.192611	7.97446	1.53052e-15	4.45326e-14	Up	N_WCS417_30m-N_Control	RNC	AT5G24810	ABC1K11	ABC1 family protein
Bnascaffold0220G0000200ZS	N_WCS417_30m	N_Control	959.942	1716.97	1338.46	-0.838254	0.10517	-7.97047	1.58076e-15	4.59659e-14	Normal	N_WCS417_30m-N_Control	RNC	--	--	--
BnaC08G0473200ZS	N_WCS417_30m	N_Control	468.193	145.647	306.92	1.68398	0.211549	7.96025	1.7169e-15	4.98934e-14	Up	N_WCS417_30m-N_Control	RNC	AT1G17380	TIFY11A	jasmonate-zim-domain protein 5
BnaA07G0164000ZS	N_WCS417_30m	N_Control	1986.73	3076.49	2531.61	-0.630829	0.0792603	-7.95895	1.73499e-15	5.0388e-14	Normal	N_WCS417_30m-N_Control	RNC	AT2G28720	HTB3	Histone superfamily protein
Bnascaffold0053G0000800ZS	N_WCS417_30m	N_Control	933.872	1626.57	1280.22	-0.800323	0.100575	-7.95747	1.75587e-15	5.09626e-14	Normal	N_WCS417_30m-N_Control	RNC	--	--	--
BnaC05G0128700ZS	N_WCS417_30m	N_Control	333.059	753.161	543.11	-1.17684	0.147918	-7.95606	1.77601e-15	5.15153e-14	Down	N_WCS417_30m-N_Control	RNC	AT1G15430	--	Protein of unknown function (DUF1644)
BnaA02G0197900ZS	N_WCS417_30m	N_Control	1430.19	2306.17	1868.18	-0.689502	0.086703	-7.95247	1.82835e-15	5.30006e-14	Normal	N_WCS417_30m-N_Control	RNC	AT1G72150	PATL1	novel cell-plate-associated protein that is related in sequence to proteins involved in membrane trafficking in other eukaryotes
Bnascaffold0198G0000300ZS	N_WCS417_30m	N_Control	1431.05	2527.17	1979.11	-0.819842	0.103123	-7.95016	1.86274e-15	5.3964e-14	Normal	N_WCS417_30m-N_Control	RNC	--	--	--
BnaA05G0263600ZS	N_WCS417_30m	N_Control	686.195	1350.14	1018.17	-0.976849	0.122946	-7.94532	1.93685e-15	5.60764e-14	Normal	N_WCS417_30m-N_Control	RNC	--	--	--
BnaA06G0073100ZS	N_WCS417_30m	N_Control	468.89	151.079	309.984	1.63234	0.205457	7.94494	1.94284e-15	5.6215e-14	Up	N_WCS417_30m-N_Control	RNC	AT1G11310	PMR2	A member of a large family of seven-transmembrane domain proteins specific to plants, homologs of the barley mildew resistance locus o (MLO) protein. The Arabidopsis genome contains 15 genes encoding MLO proteins, with localization in plasma membrane. Phylogenetic analysis revealed four clades of closely-related AtMLO genes. ATMLO2 belongs to the clade IV, with AtMLO3, AtMLO6 and AtMLO12. The gen…
BnaC01G0493200ZS	N_WCS417_30m	N_Control	724.391	1366.97	1045.68	-0.915514	0.11525	-7.94373	1.9619e-15	5.67316e-14	Normal	N_WCS417_30m-N_Control	RNC	AT3G07390	AIR12	isolated from differential screening of a cDNA library from auxin-treated root culture. sequence does not show homology to any known proteins and is predicted to be extracellular.
BnaC03G0640100ZS	N_WCS417_30m	N_Control	818.094	371.102	594.598	1.14078	0.143613	7.94342	1.96674e-15	5.68364e-14	Up	N_WCS417_30m-N_Control	RNC	--	--	--
Bnascaffold0197G0000400ZS	N_WCS417_30m	N_Control	1137.67	1942.1	1539.89	-0.771099	0.0970869	-7.94236	1.98374e-15	5.72924e-14	Normal	N_WCS417_30m-N_Control	RNC	--	--	--
BnaA08G0225200ZS	N_WCS417_30m	N_Control	1042.51	513.03	777.77	1.02227	0.128734	7.9409	2.00726e-15	5.79358e-14	Up	N_WCS417_30m-N_Control	RNC	AT1G25275	--	--
BnaC01G0020200ZS	N_WCS417_30m	N_Control	1461.88	770.566	1116.22	0.922841	0.116251	7.93838	2.04842e-15	5.90874e-14	Normal	N_WCS417_30m-N_Control	RNC	AT4G36990	TBF1	Encodes a protein whose sequence is similar to heat shock factors that regulate the expression of heat shock proteins. Transcript level is increased in response to heat shock. However, overexpression of this gene did not result in the increase of decrease of heat shock proteins.
Bnascaffold1656G0000100ZS	N_WCS417_30m	N_Control	1147.24	2147.07	1647.16	-0.904969	0.114042	-7.93541	2.09805e-15	6.04817e-14	Normal	N_WCS417_30m-N_Control	RNC	--	--	--
BnaA09G0653500ZS	N_WCS417_30m	N_Control	1143.21	561.321	852.266	1.02566	0.129257	7.93504	2.10432e-15	6.06251e-14	Up	N_WCS417_30m-N_Control	RNC	AT1G11310	PMR2	A member of a large family of seven-transmembrane domain proteins specific to plants, homologs of the barley mildew resistance locus o (MLO) protein. The Arabidopsis genome contains 15 genes encoding MLO proteins, with localization in plasma membrane. Phylogenetic analysis revealed four clades of closely-related AtMLO genes. ATMLO2 belongs to the clade IV, with AtMLO3, AtMLO6 and AtMLO12. The gen…
Bnascaffold0026G0014100ZS	N_WCS417_30m	N_Control	792.219	1446.77	1119.49	-0.868603	0.109485	-7.93353	2.13002e-15	6.13278e-14	Normal	N_WCS417_30m-N_Control	RNC	--	--	--
BnaA10G0163100ZS	N_WCS417_30m	N_Control	1686.28	954.4	1320.34	0.820566	0.103438	7.93291	2.14069e-15	6.1597e-14	Normal	N_WCS417_30m-N_Control	RNC	AT5G22630	ADT5	Encodes a plastid-localized arogenate dehydratase involved in phenylalanine biosynthesis. Not less than six genes encoding ADT were identi&#64257;ed in the Arabidopsis genome: ADT1 [At1g11790]; ADT2 [At3g07630]; ADT3 [At2g27820]; ADT4 [At3g44720]; ADT5 [At5g22630]; and ADT6 [At1g08250].
BnaC06G0014200ZS	N_WCS417_30m	N_Control	1340.22	719.901	1030.06	0.896074	0.113058	7.9258	2.26684e-15	6.51868e-14	Normal	N_WCS417_30m-N_Control	RNC	AT1G45145	TRX5	encodes a cytosolic thioredoxin that reduces disulfide bridges of target proteins by the reversible formation of a disulfide bridge between two neighboring Cys residues present in the active site. Thioredoxins have been found to regulate a variety of biological reactions in prokaryotic and eukaryotic cells.
Bnascaffold0987G0000100ZS	N_WCS417_30m	N_Control	469.462	984.347	726.905	-1.06835	0.13482	-7.92426	2.29501e-15	6.59566e-14	Down	N_WCS417_30m-N_Control	RNC	--	--	--
BnaC07G0024200ZS	N_WCS417_30m	N_Control	2163.78	3430.43	2797.1	-0.664583	0.083868	-7.92416	2.29693e-15	6.59713e-14	Normal	N_WCS417_30m-N_Control	RNC	AT2G19590	ATACO1	encodes a protein whose sequence is similar to 1-aminocyclopropane-1-carboxylate oxidase
Bnascaffold0027G0058900ZS	N_WCS417_30m	N_Control	658.217	1272.43	965.325	-0.951431	0.120091	-7.92255	2.32683e-15	6.67889e-14	Normal	N_WCS417_30m-N_Control	RNC	--	--	--
BnaC05G0180100ZS	N_WCS417_30m	N_Control	295.651	692.684	494.167	-1.22848	0.155101	-7.92052	2.36513e-15	6.78468e-14	Down	N_WCS417_30m-N_Control	RNC	AT1G21010	--	--
Bnascaffold0037G0000500ZS	N_WCS417_30m	N_Control	922.33	1611.84	1267.09	-0.805265	0.10171	-7.91723	2.42859e-15	6.96245e-14	Normal	N_WCS417_30m-N_Control	RNC	--	--	--
BnaA02G0262100ZS	N_WCS417_30m	N_Control	732.678	315.816	524.247	1.2134	0.15337	7.91162	2.54061e-15	7.27915e-14	Up	N_WCS417_30m-N_Control	RNC	AT4G12400	Hop3	Encodes one of the 36 carboxylate clamp (CC)-tetratricopeptide repeat (TPR) proteins (Prasad 2010, Pubmed ID: 20856808) with potential to interact with Hsp90/Hsp70 as co-chaperones.
BnaA05G0324000ZS	N_WCS417_30m	N_Control	506.001	1013.71	759.857	-1.00217	0.126687	-7.91057	2.56211e-15	7.33625e-14	Down	N_WCS417_30m-N_Control	RNC	AT1G32470	GDC-H1	Single hybrid motif superfamily protein
Bnascaffold0249G0000400ZS	N_WCS417_30m	N_Control	894.519	1629.67	1262.09	-0.864993	0.109367	-7.90907	2.5932e-15	7.42073e-14	Normal	N_WCS417_30m-N_Control	RNC	--	--	--
BnaC02G0363900ZS	N_WCS417_30m	N_Control	1003.84	1718.92	1361.38	-0.775776	0.0981546	-7.90361	2.70934e-15	7.74833e-14	Normal	N_WCS417_30m-N_Control	RNC	AT4G11320	CP2	Papain family cysteine protease
BnaA08G0167000ZS	N_WCS417_30m	N_Control	1907.1	3090.46	2498.78	-0.696022	0.0881584	-7.89514	2.89998e-15	8.28849e-14	Normal	N_WCS417_30m-N_Control	RNC	AT4G27500	PPI1	interacts with H+-ATPase, and regulates its activity
BnaC05G0153600ZS	N_WCS417_30m	N_Control	361.688	83.7693	222.729	2.11533	0.267965	7.89403	2.92587e-15	8.35737e-14	Up	N_WCS417_30m-N_Control	RNC	AT1G18330	RVE7	EARLY-PHYTOCHROME-RESPONSIVE1
BnaC03G0052300ZS	N_WCS417_30m	N_Control	2642.48	1565.61	2104.04	0.755955	0.0958174	7.88954	3.03305e-15	8.65825e-14	Normal	N_WCS417_30m-N_Control	RNC	AT5G11670	NADP-ME2	The malic enzyme (EC 1.1.1.40) encoded by AtNADP-ME2 is presumably a cytosolic enzyme involved in malate metabolism and possibly assisting the oxidative pentose phosphate pathway. AtNADP-ME2 counts for the major part of NADP-ME activity in mature tissues of Arabidopsis.
BnaC06G0243600ZS	N_WCS417_30m	N_Control	2183.59	1339.67	1761.63	0.704574	0.0893327	7.88708	3.09332e-15	8.82492e-14	Normal	N_WCS417_30m-N_Control	RNC	AT1G80380	GLYK	encodes a glycerate kinase which catalyzes the last step of photorespiration C2 cycle.
BnaA08G0213700ZS	N_WCS417_30m	N_Control	226.459	581.122	403.791	-1.35931	0.172361	-7.88641	3.10999e-15	8.86707e-14	Down	N_WCS417_30m-N_Control	RNC	AT1G28370	ERF11	encodes a member of the ERF (ethylene response factor) subfamily B-1 of ERF/AP2 transcription factor family. The protein contains one AP2 domain. There are 15 members in this subfamily including ATERF-3, ATERF-4, ATERF-7, and leafy petiole.
Bnascaffold0060G0000300ZS	N_WCS417_30m	N_Control	784.078	1428.15	1106.11	-0.864812	0.109676	-7.88513	3.14199e-15	8.94762e-14	Normal	N_WCS417_30m-N_Control	RNC	--	--	--
BnaC05G0224800ZS	N_WCS417_30m	N_Control	835.544	386.73	611.137	1.11138	0.140946	7.88513	3.14206e-15	8.94762e-14	Up	N_WCS417_30m-N_Control	RNC	AT1G25560	TEM1	Encodes a member of the RAV transcription factor family that contains AP2 and B3 binding domains. Involved in the regulation of flowering under long days. Loss of function results in early flowering. Overexpression causes late flowering and repression of expression of FT. Novel transcriptional regulator involved in ethylene signaling. Promoter bound by EIN3. EDF1 in turn, binds to promoter elemen…
BnaA02G0312200ZS	N_WCS417_30m	N_Control	222.792	34.5471	128.67	2.68662	0.340741	7.88465	3.15415e-15	8.97657e-14	Up	N_WCS417_30m-N_Control	RNC	AT2G01150	RHA2B	Encodes a RING-H2 finger protein that is expressed in vascular tissue, root tips, embryos and pistils.
BnaA09G0356900ZS	N_WCS417_30m	N_Control	458.726	945.336	702.031	-1.04293	0.13229	-7.88364	3.17977e-15	9.044e-14	Down	N_WCS417_30m-N_Control	RNC	--	--	--
BnaA01G0069200ZS	N_WCS417_30m	N_Control	288.335	691.611	489.973	-1.26137	0.160121	-7.87761	3.33704e-15	9.48555e-14	Down	N_WCS417_30m-N_Control	RNC	AT4G30440	GAE1	UDP-D-glucuronate 4-epimerase
BnaA05G0246200ZS	N_WCS417_30m	N_Control	2746.66	4399.44	3573.05	-0.679219	0.086359	-7.86506	3.6893e-15	1.04805e-13	Normal	N_WCS417_30m-N_Control	RNC	--	--	--
BnaA07G0315200ZS	N_WCS417_30m	N_Control	205.704	28.0983	116.901	2.86437	0.364565	7.85696	3.93574e-15	1.11738e-13	Up	N_WCS417_30m-N_Control	RNC	AT1G33600	--	Leucine-rich repeat (LRR) family protein
BnaC02G0280500ZS	N_WCS417_30m	N_Control	2763.17	1713.45	2238.31	0.689311	0.0877723	7.85341	4.04878e-15	1.14877e-13	Normal	N_WCS417_30m-N_Control	RNC	AT1G74100	SOT16	encodes a desulfoglucosinolate sulfotransferase, involved in the final step of glucosinolate core structure biosynthesis. Has a broad-substrate specificity with different desulfoglucosinolates, the best substrate is indole-3-methyl-dsGS, followed by benzyl-dsGS. Expression was induced by wounding, jasmonate and ethylene stimulates.
BnaA09G0592600ZS	N_WCS417_30m	N_Control	2449.58	3807.39	3128.48	-0.635889	0.0810288	-7.84768	4.2379e-15	1.20171e-13	Normal	N_WCS417_30m-N_Control	RNC	AT2G22470	ATAGP2	Encodes arabinogalactan-protein (AGP2).
BnaC06G0076100ZS	N_WCS417_30m	N_Control	1406.28	757.725	1082	0.891497	0.113606	7.84729	4.25121e-15	1.20475e-13	Normal	N_WCS417_30m-N_Control	RNC	AT1G53210	NCL	Encodes a Na+/Ca 2+ exchanger-like protein that participates in the maintenance of Ca 2+ homeostasis.
Bnascaffold0027G0044100ZS	N_WCS417_30m	N_Control	760.583	1386.13	1073.36	-0.866313	0.110421	-7.84556	4.31035e-15	1.22077e-13	Normal	N_WCS417_30m-N_Control	RNC	--	--	--
BnaA09G0332200ZS	N_WCS417_30m	N_Control	735.432	1363.67	1049.55	-0.890281	0.113481	-7.84521	4.32219e-15	1.22338e-13	Normal	N_WCS417_30m-N_Control	RNC	--	--	--
Bnascaffold2744G0000100ZS	N_WCS417_30m	N_Control	1445.88	2332.3	1889.09	-0.689685	0.0879274	-7.84379	4.37135e-15	1.23621e-13	Normal	N_WCS417_30m-N_Control	RNC	--	--	--
Bnascaffold0051G0000700ZS	N_WCS417_30m	N_Control	1009.88	1798.09	1403.99	-0.832044	0.106077	-7.84375	4.37277e-15	1.23621e-13	Normal	N_WCS417_30m-N_Control	RNC	--	--	--
BnaA05G0214200ZS	N_WCS417_30m	N_Control	433.803	934.023	683.913	-1.10715	0.141189	-7.84158	4.44922e-15	1.25706e-13	Down	N_WCS417_30m-N_Control	RNC	--	--	--
BnaC06G0303400ZS	N_WCS417_30m	N_Control	892.331	418.952	655.642	1.09015	0.139038	7.8406	4.48388e-15	1.26609e-13	Up	N_WCS417_30m-N_Control	RNC	AT1G69930	GSTU11	Encodes glutathione transferase belonging to the tau class of GSTs. Naming convention according to Wagner et al. (2002).
BnaC07G0541600ZS	N_WCS417_30m	N_Control	321.025	80.2994	200.662	1.99684	0.254715	7.8395	4.52353e-15	1.27651e-13	Up	N_WCS417_30m-N_Control	RNC	AT4G39940	APK2	adenosine-5'-phosphosulfate-kinase (akn2) mRNA, complete
BnaC02G0204200ZS	N_WCS417_30m	N_Control	1592.18	2511.52	2051.85	-0.657785	0.0839275	-7.83754	4.59475e-15	1.29583e-13	Normal	N_WCS417_30m-N_Control	RNC	AT1G66200	GSR2	encodes a cytosolic glutamate synthetase, this enzyme has low affinity with substrate ammonium
BnaA09G0109100ZS	N_WCS417_30m	N_Control	627.753	1189.75	908.75	-0.922158	0.117709	-7.83425	4.71664e-15	1.32941e-13	Normal	N_WCS417_30m-N_Control	RNC	AT2G16485	NERD	Encodes NERD (Needed for RDR2-independent DNA methylation), a plant-specific GW repeat- and PHD finger-containing protein involved in siRNA-dependent DNA methylation.
BnaC09G0375000ZS	N_WCS417_30m	N_Control	1279.85	2113.2	1696.52	-0.723559	0.0923728	-7.83303	4.76236e-15	1.34148e-13	Normal	N_WCS417_30m-N_Control	RNC	AT5G54960	PDC2	pyruvate decarboxylase-2
Bnascaffold0027G0045000ZS	N_WCS417_30m	N_Control	732.861	1352.79	1042.83	-0.884507	0.11294	-7.83165	4.81518e-15	1.35555e-13	Normal	N_WCS417_30m-N_Control	RNC	--	--	--
BnaC07G0195900ZS	N_WCS417_30m	N_Control	70.1917	289.061	179.626	-2.04191	0.260743	-7.83111	4.83581e-15	1.36054e-13	Down	N_WCS417_30m-N_Control	RNC	AT1G20310	--	--
Bnascaffold0349G0000200ZS	N_WCS417_30m	N_Control	1019.48	1740.33	1379.91	-0.771206	0.0985845	-7.82279	5.16667e-15	1.45275e-13	Normal	N_WCS417_30m-N_Control	RNC	AT3G45640	MPK3	Encodes a mitogen-activated kinase whose mRNA levels increase in response to touch, cold, salinity stress and chitin oligomers.Also functions in ovule development. Heterozygous MPK3 mutants in a homozygous MPK6 background are female sterile due to defects in integument development. MPK3 can be dephosphorylated by MKP2 in vitro.
BnaA07G0320800ZS	N_WCS417_30m	N_Control	267.493	640.576	454.034	-1.25963	0.161033	-7.82219	5.19137e-15	1.45882e-13	Down	N_WCS417_30m-N_Control	RNC	AT1G70740	--	Protein kinase superfamily protein
Bnascaffold0249G0000100ZS	N_WCS417_30m	N_Control	757.007	1406.76	1081.88	-0.893439	0.114269	-7.81871	5.33674e-15	1.49877e-13	Normal	N_WCS417_30m-N_Control	RNC	--	--	--
BnaA01G0008700ZS	N_WCS417_30m	N_Control	824.307	380.921	602.614	1.11415	0.14251	7.81804	5.3652e-15	1.50586e-13	Up	N_WCS417_30m-N_Control	RNC	AT4G39950	CYP79B2	Belongs to cytochrome P450 and is involved in tryptophan metabolism. Converts Trp to indo-3-acetaldoxime (IAOx), a precursor to IAA and indole glucosinolates.
BnaA10G0079900ZS	N_WCS417_30m	N_Control	1028.96	1740.44	1384.7	-0.758351	0.0970231	-7.81618	5.44491e-15	1.52732e-13	Normal	N_WCS417_30m-N_Control	RNC	--	--	--
BnaC01G0081800ZS	N_WCS417_30m	N_Control	749.229	330.491	539.86	1.1815	0.151178	7.81525	5.48538e-15	1.53775e-13	Up	N_WCS417_30m-N_Control	RNC	AT4G30460	--	glycine-rich protein
BnaA03G0513900ZS	N_WCS417_30m	N_Control	762.207	340.338	551.272	1.16265	0.148807	7.81317	5.57693e-15	1.56247e-13	Up	N_WCS417_30m-N_Control	RNC	AT4G29900	CIF1	--
Bnascaffold1644G0000100ZS	N_WCS417_30m	N_Control	498.165	998.979	748.572	-1.00426	0.128639	-7.80684	5.86391e-15	1.6419e-13	Down	N_WCS417_30m-N_Control	RNC	--	--	--
Bnascaffold0037G0000800ZS	N_WCS417_30m	N_Control	863.585	1554.36	1208.97	-0.847809	0.10863	-7.80453	5.97247e-15	1.67129e-13	Normal	N_WCS417_30m-N_Control	RNC	--	--	--
BnaA06G0232100ZS	N_WCS417_30m	N_Control	345.254	790.517	567.885	-1.19603	0.153367	-7.79847	6.26601e-15	1.75239e-13	Down	N_WCS417_30m-N_Control	RNC	--	--	--
BnaA06G0098400ZS	N_WCS417_30m	N_Control	159.494	14.0278	86.7608	3.49658	0.448676	7.79309	6.53887e-15	1.82761e-13	Up	N_WCS417_30m-N_Control	RNC	AT1G14860	NUDT18	nudix hydrolase homolog 18
Bnascaffold0031G0000200ZS	N_WCS417_30m	N_Control	764.453	1385.57	1075.01	-0.8576	0.110102	-7.78911	6.74846e-15	1.88506e-13	Normal	N_WCS417_30m-N_Control	RNC	--	--	--
BnaA01G0385200ZS	N_WCS417_30m	N_Control	720.455	1351.76	1036.11	-0.907199	0.116485	-7.78813	6.80088e-15	1.89857e-13	Normal	N_WCS417_30m-N_Control	RNC	AT3G07390	AIR12	isolated from differential screening of a cDNA library from auxin-treated root culture. sequence does not show homology to any known proteins and is predicted to be extracellular.
BnaC09G0584800ZS	N_WCS417_30m	N_Control	3955.44	5542.06	4748.75	-0.486552	0.0624969	-7.78521	6.95977e-15	1.94177e-13	Normal	N_WCS417_30m-N_Control	RNC	AT5G06320	NHL3	encodes a protein whose sequence is similar to tobacco hairpin-induced gene (HIN1) and Arabidopsis non-race specific disease resistance gene (NDR1). Expression of this gene is induced by cucumber mosaic virus, spermine and Pseudomonas syringae pv. tomato DC3000. The gene product is localized to the plasma membrane.
BnaC08G0443900ZS	N_WCS417_30m	N_Control	2563.32	3802.38	3182.85	-0.568751	0.073063	-7.78439	7.00505e-15	1.95324e-13	Normal	N_WCS417_30m-N_Control	RNC	AT2G22500	UCP5	Encodes one of the mitochondrial dicarboxylate carriers (DIC): DIC1 (AT2G22500), DIC2 (AT4G24570), DIC3 (AT5G09470).
Bnascaffold2170G0000300ZS	N_WCS417_30m	N_Control	542.874	1054.57	798.723	-0.957969	0.123069	-7.784	7.02641e-15	1.95803e-13	Normal	N_WCS417_30m-N_Control	RNC	--	--	--
BnaA05G0193200ZS	N_WCS417_30m	N_Control	874.953	1547.77	1211.36	-0.822545	0.105683	-7.78311	7.07647e-15	1.9708e-13	Normal	N_WCS417_30m-N_Control	RNC	--	--	--
BnaC03G0533500ZS	N_WCS417_30m	N_Control	5922.44	4080.41	5001.42	0.537708	0.0691089	7.7806	7.21814e-15	2.00906e-13	Normal	N_WCS417_30m-N_Control	RNC	AT5G64250	--	Aldolase-type TIM barrel family protein
BnaA09G0323600ZS	N_WCS417_30m	N_Control	1056.7	1796.83	1426.76	-0.765937	0.09846	-7.77917	7.30022e-15	2.0307e-13	Normal	N_WCS417_30m-N_Control	RNC	--	--	--
Bnascaffold0035G0000700ZS	N_WCS417_30m	N_Control	993.537	1695.51	1344.52	-0.771066	0.0991494	-7.77681	7.43767e-15	2.06771e-13	Normal	N_WCS417_30m-N_Control	RNC	--	--	--
BnaA02G0393100ZS	N_WCS417_30m	N_Control	316.877	76.3891	196.633	2.05484	0.264232	7.77664	7.44741e-15	2.06919e-13	Up	N_WCS417_30m-N_Control	RNC	AT5G61210	SNP33	membrane localized t-SNARE SNAP25 homologue, probably involved in cytokinesis and cell plate formation
BnaC03G0529400ZS	N_WCS417_30m	N_Control	439.571	986.459	713.015	-1.16564	0.150027	-7.76958	7.87478e-15	2.18663e-13	Down	N_WCS417_30m-N_Control	RNC	AT5G64660	CMPG2	CYS, MET, PRO, and GLY protein 2
BnaA01G0283300ZS	N_WCS417_30m	N_Control	320.633	82.1978	201.415	1.96292	0.252655	7.76919	7.89905e-15	2.19207e-13	Up	N_WCS417_30m-N_Control	RNC	AT1G61820	BGLU46	beta glucosidase 46
BnaC03G0466600ZS	N_WCS417_30m	N_Control	2243.85	1376.15	1810	0.705728	0.0908534	7.76777	7.98793e-15	2.21542e-13	Normal	N_WCS417_30m-N_Control	RNC	AT3G24480	LRX4	Leucine-rich repeat (LRR) family protein
BnaC08G0353700ZS	N_WCS417_30m	N_Control	666.656	273.953	470.304	1.28399	0.165395	7.76316	8.28361e-15	2.29607e-13	Up	N_WCS417_30m-N_Control	RNC	AT3G55430	--	O-Glycosyl hydrolases family 17 protein
BnaA08G0320700ZS	N_WCS417_30m	N_Control	884.545	394.799	639.672	1.1624	0.149808	7.75932	8.53869e-15	2.36537e-13	Up	N_WCS417_30m-N_Control	RNC	AT1G02930	GSTF6	Encodes glutathione transferase belonging to the phi class of GSTs. Naming convention according to Wagner et al. (2002).
BnaC06G0123300ZS	N_WCS417_30m	N_Control	506.045	186.266	346.155	1.44183	0.185897	7.75605	8.76158e-15	2.42568e-13	Up	N_WCS417_30m-N_Control	RNC	AT1G52720	--	--
BnaC03G0585300ZS	N_WCS417_30m	N_Control	735.344	1485.54	1110.44	-1.01355	0.130693	-7.75519	8.82143e-15	2.4408e-13	Down	N_WCS417_30m-N_Control	RNC	--	--	--
BnaA03G0399200ZS	N_WCS417_30m	N_Control	306.707	69.8904	188.299	2.12939	0.274579	7.7551	8.82713e-15	2.44094e-13	Up	N_WCS417_30m-N_Control	RNC	AT2G16720	MYB7	Encodes a member of MYB3R- and R2R3- type MYB- encoding genes
Bnascaffold0025G0009100ZS	N_WCS417_30m	N_Control	2483.97	1501.79	1992.88	0.725239	0.0935488	7.75252	9.00884e-15	2.48972e-13	Normal	N_WCS417_30m-N_Control	RNC	AT4G30530	GGP1	Encodes a gamma-glutamyl peptidase, outside the GGT family, that can hydrolyze gamma-glutamyl peptide bonds.
BnaC03G0116500ZS	N_WCS417_30m	N_Control	237.239	624.5	430.87	-1.39499	0.179942	-7.75243	9.01515e-15	2.48999e-13	Down	N_WCS417_30m-N_Control	RNC	AT5G59590	UGT76E2	UDP-glucosyl transferase 76E2
BnaC04G0582400ZS	N_WCS417_30m	N_Control	576.984	226.97	401.977	1.34664	0.173722	7.75169	9.06791e-15	2.50309e-13	Up	N_WCS417_30m-N_Control	RNC	AT2G41480	PRX25	Encodes a cationic cell-wall-bound peroxidase homolog that is involved in the lignification of cell walls.
BnaA03G0473300ZS	N_WCS417_30m	N_Control	271.386	58.8205	165.103	2.20926	0.285311	7.74334	9.68407e-15	2.67159e-13	Up	N_WCS417_30m-N_Control	RNC	AT4G23570	SGT1A	Closely related to SGT1B, may function in SCF(TIR1) mediated protein degradation. AtSGT1a and AtSGT1b are functionally redundant in the resistance to pathogenes. AtSGT1b was more highly expressed than AtSGT1. The N-terminal TPR domain of AtSGT1a reduces the steady-state level of Arabidopsis SGT1 proteins whereas the same domain from AtSGT1b enhances SGT1 accumulation. The TPR domain is dispensabl…
BnaC03G0111900ZS	N_WCS417_30m	N_Control	6754.05	9209.52	7981.78	-0.447421	0.0577865	-7.74265	9.73629e-15	2.68442e-13	Normal	N_WCS417_30m-N_Control	RNC	AT5G60390	EF1alpha	GTP binding Elongation factor Tu family protein
BnaA02G0147300ZS	N_WCS417_30m	N_Control	33.5371	203.699	118.618	-2.6018	0.33611	-7.74093	9.86916e-15	2.71945e-13	Down	N_WCS417_30m-N_Control	RNC	AT5G52020	--	encodes a member of the DREB subfamily A-4 of ERF/AP2 transcription factor family. The protein contains one AP2 domain. There are 17 members in this subfamily including TINY.
BnaA01G0017500ZS	N_WCS417_30m	N_Control	1171.81	616.729	894.269	0.925823	0.119608	7.74045	9.90626e-15	2.72807e-13	Normal	N_WCS417_30m-N_Control	RNC	AT4G36990	TBF1	Encodes a protein whose sequence is similar to heat shock factors that regulate the expression of heat shock proteins. Transcript level is increased in response to heat shock. However, overexpression of this gene did not result in the increase of decrease of heat shock proteins.
BnaC03G0276100ZS	N_WCS417_30m	N_Control	651.997	268.812	460.404	1.27934	0.165316	7.73872	1.00425e-14	2.76395e-13	Up	N_WCS417_30m-N_Control	RNC	AT2G27500	--	Glycosyl hydrolase superfamily protein
Bnascaffold0919G0000500ZS	N_WCS417_30m	N_Control	844.984	1499.83	1172.41	-0.828163	0.107076	-7.73434	1.03943e-14	2.85911e-13	Normal	N_WCS417_30m-N_Control	RNC	--	--	--
Bnascaffold0027G0038000ZS	N_WCS417_30m	N_Control	702.793	1353.6	1028.2	-0.945293	0.122247	-7.73264	1.05337e-14	2.89575e-13	Normal	N_WCS417_30m-N_Control	RNC	--	--	--
BnaA01G0306600ZS	N_WCS417_30m	N_Control	240.916	598.492	419.704	-1.31321	0.169851	-7.7315	1.06285e-14	2.9201e-13	Down	N_WCS417_30m-N_Control	RNC	AT3G21510	AHP1	Encodes AHP1, one of the six Arabidopsis thaliana histidine phosphotransfer proteins (AHPs). AHPs function as redundant positive regulators of cytokinin signaling. Members of the AHP gene family include: AT3G21510 (AHP1), AT3G29350 (AHP2), AT5G39340 (AHP3), AT3G16360 (AHP4), AT1G03430 (AHP5) and AT1G80100 (AHP6).
BnaA05G0155300ZS	N_WCS417_30m	N_Control	1208.92	641.464	925.192	0.914541	0.118342	7.72795	1.09296e-14	2.99946e-13	Normal	N_WCS417_30m-N_Control	RNC	AT1G55210	--	Disease resistance-responsive (dirigent-like protein) family protein
BnaC04G0125000ZS	N_WCS417_30m	N_Control	394.131	839.796	616.964	-1.09109	0.141188	-7.72794	1.09302e-14	2.99946e-13	Down	N_WCS417_30m-N_Control	RNC	AT2G34430	LHCB1.4	Photosystem II type I chlorophyll a/b-binding protein
BnaC01G0081900ZS	N_WCS417_30m	N_Control	3319.19	2211.91	2765.55	0.585279	0.0757854	7.72284	1.13762e-14	3.12002e-13	Normal	N_WCS417_30m-N_Control	RNC	--	--	--
BnaC04G0039700ZS	N_WCS417_30m	N_Control	423.732	140.257	281.995	1.59495	0.206578	7.72082	1.15588e-14	3.16824e-13	Up	N_WCS417_30m-N_Control	RNC	AT2G43120	PRN2	RmlC-like cupins superfamily protein
BnaA03G0101500ZS	N_WCS417_30m	N_Control	225.205	592.214	408.709	-1.39376	0.180559	-7.71914	1.17121e-14	3.20839e-13	Down	N_WCS417_30m-N_Control	RNC	AT5G59720	HSP18.2	encodes a low molecular weight heat shock protein that contains the heat shock element in the promoter region. Expression is induced in response to heat shock.
BnaA09G0147800ZS	N_WCS417_30m	N_Control	755.116	1369.99	1062.55	-0.858935	0.111291	-7.71795	1.18218e-14	3.23566e-13	Normal	N_WCS417_30m-N_Control	RNC	AT1G63840	--	RING/U-box superfamily protein
[truncated: 45,057 more rows]

## Sheet: N_WCS417_6h-N_Control
Table S. Results of differential translation gene analysis of RNC-seq.
[truncated: 46,551 more rows]

## Sheet: N_WCS417_6h-N_WCS417_30m
Table S3. Results of differential translation gene analysis of RNC-seq.
[truncated: 47,044 more rows]
