# Supplementary material for: Integrated transcriptome and translatome analyses reveal the early regulatory network of Brassica napus roots in response to the growth-promoting rhizobacterium Pseudomonas simiae WCS417
Source: Research Square preprint supplement (doi:10.21203/rs.3.rs-7990582/v1), 2025-11-13
Supplement: Supplementary file 7 [file b7ac5d13a53c2e775ca7c2ec.docx]

**
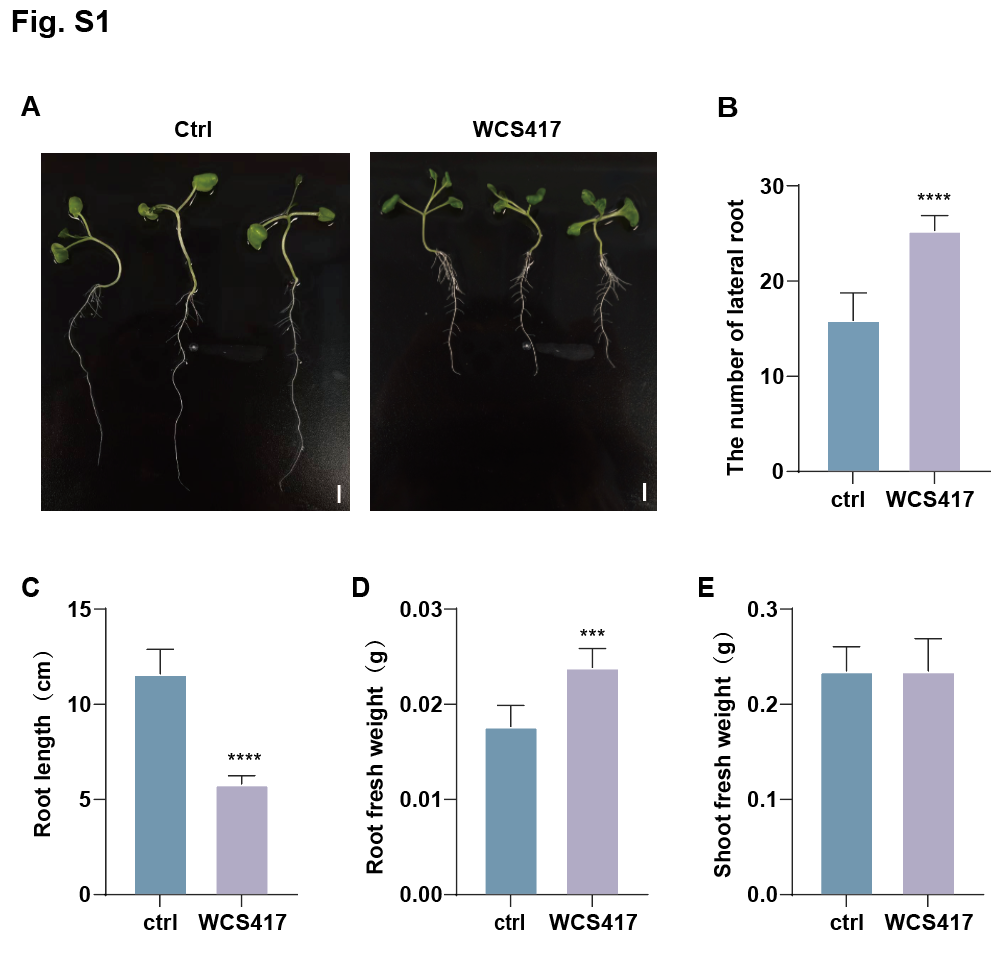
Fig S1. The developmental responses of B. napus seedlings to WCS417 were assessed in a** ½ **MS liquid medium.**

**A.** WCS417 induces changes in root architecture. **B-E.** Quantification of growth parameters in seedlings with or without WCS417 inoculation. **(B)** Lateral root number. **(C)** Primary root length. **(D)** Root fresh weight. **(E)** Shoot fresh weight. Significance analysis was calculated using GraphPad Prism 8 with an unpaired two-tailed Student's *t*-test. Error bars represent the standard deviation of six biological replicates. *n* = 6; Asterisks indicate significant differences between the two sets of data. *** P < 0.01*，**** P <0.001*, *****P < 0.0001*. Scale bar, 1 cm.


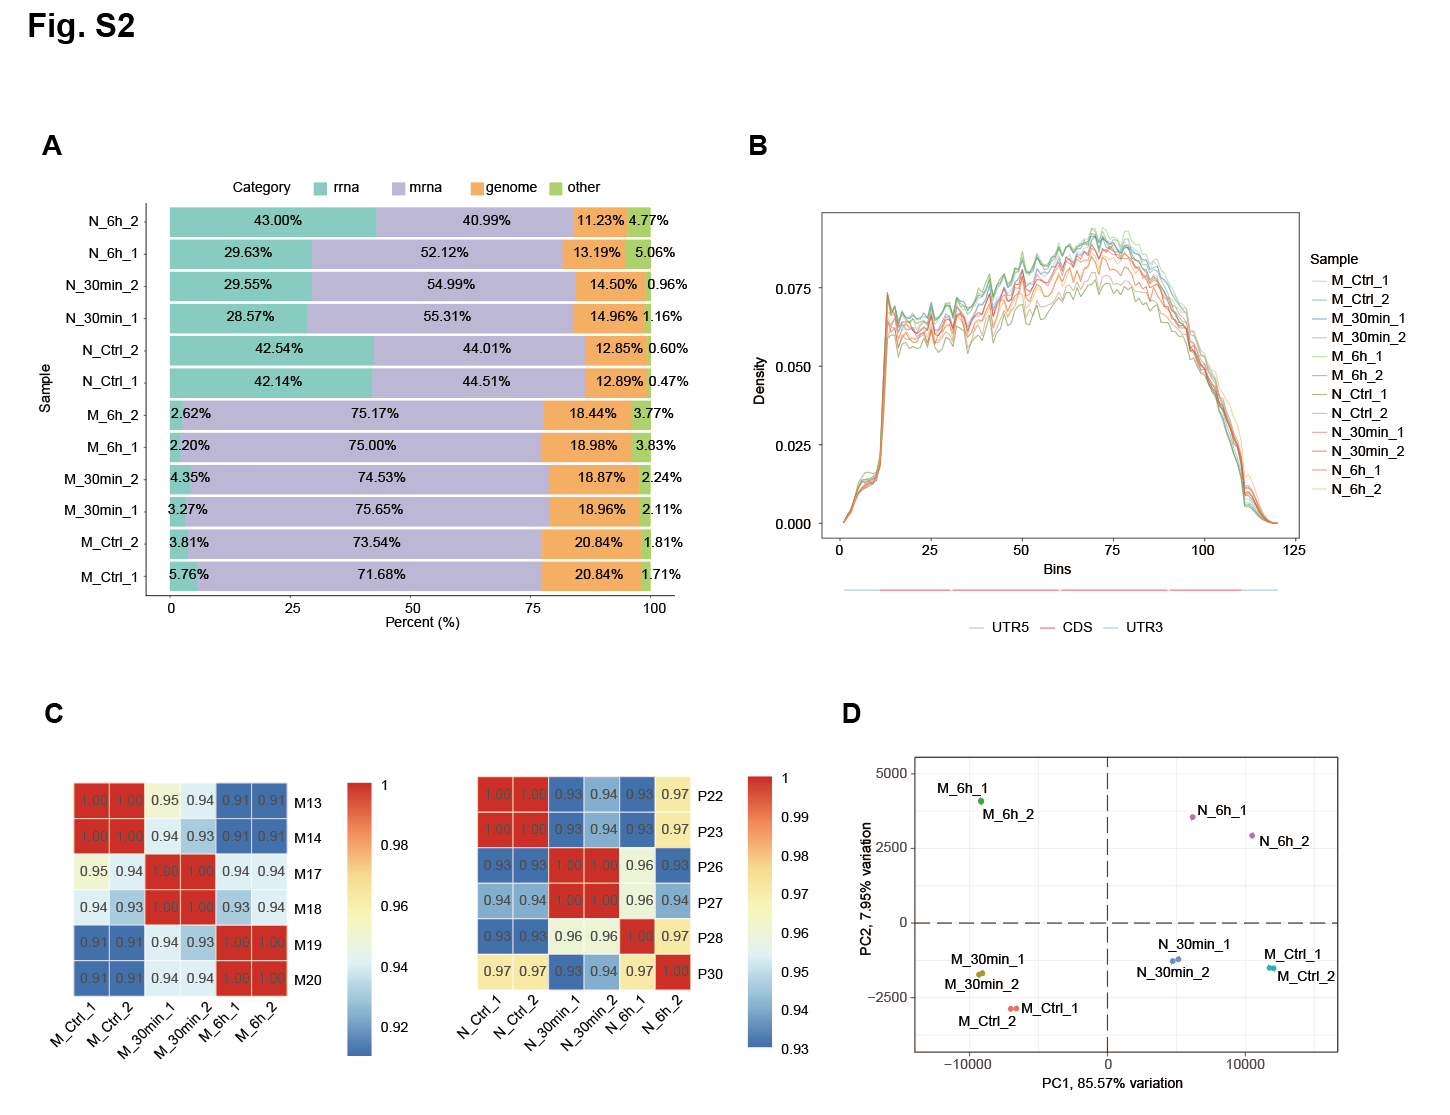


**Fig S2. Quality control analysis of transcriptome and translatome sequencing data. A.** Proportion of reads mapped to different types of reference sequences in RNA-seq and RNC-seq. **B.** Read density profile of RNC-seq reads across gene bodies. **C.** Correlation analysis among different time points and treatment groups in RNA-seq and RNC-seq. **D.** Principal component analysis of RNA-seq and RNC-seq data across different time points and treatment groups.
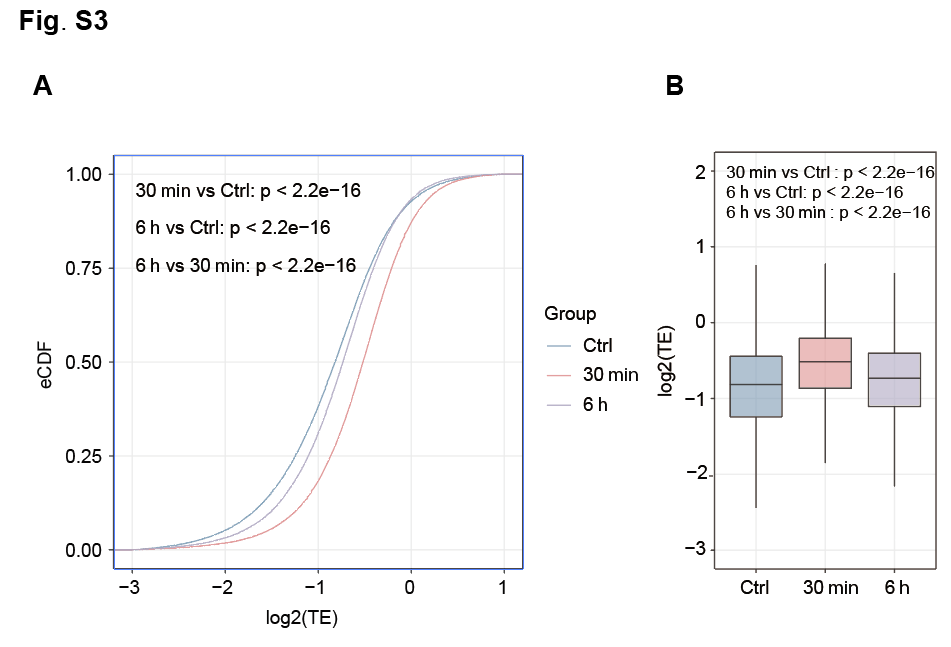


**Figure S3. Changes in global translation ratios of plant genes following bacterial colonization. A.** Cumulative distribution plot. **B.** Box plot.

**
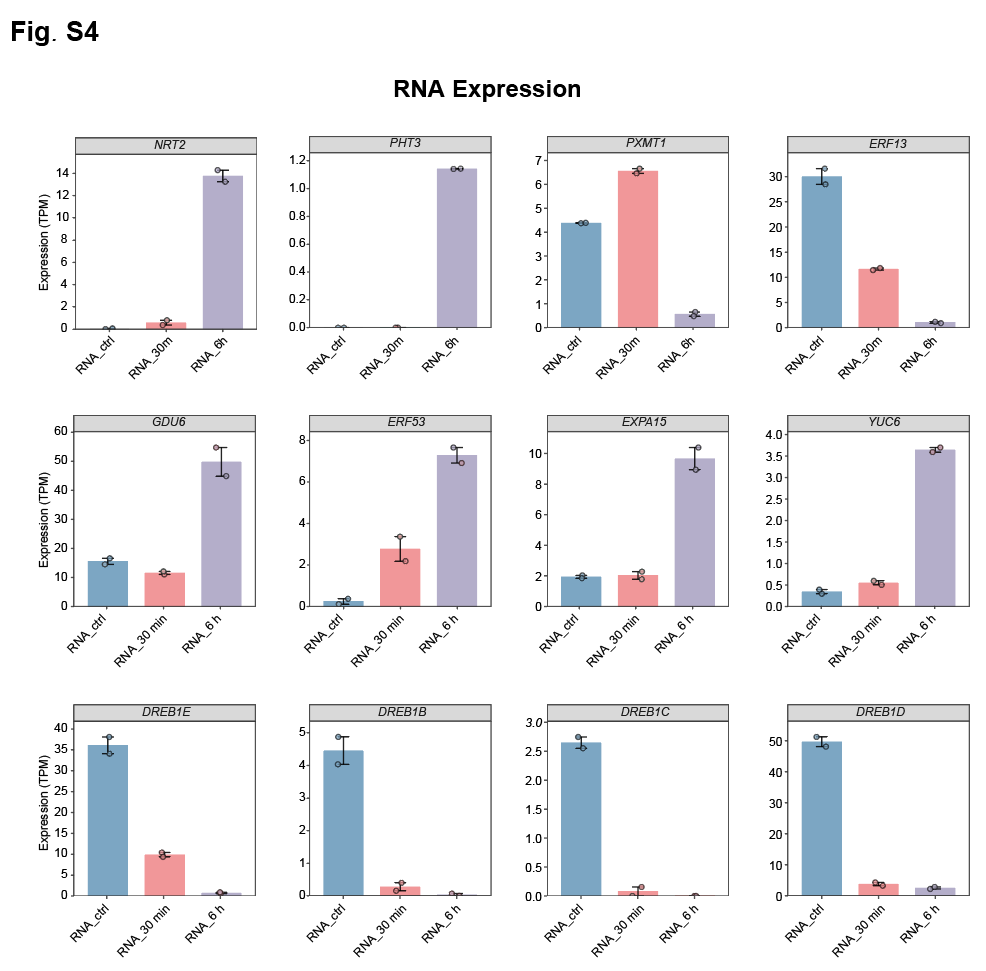
**

**Figure S4.** **Genes with altered mRNA expression levels at 30 minutes and 6 hours post-WCS417 infection.**

**
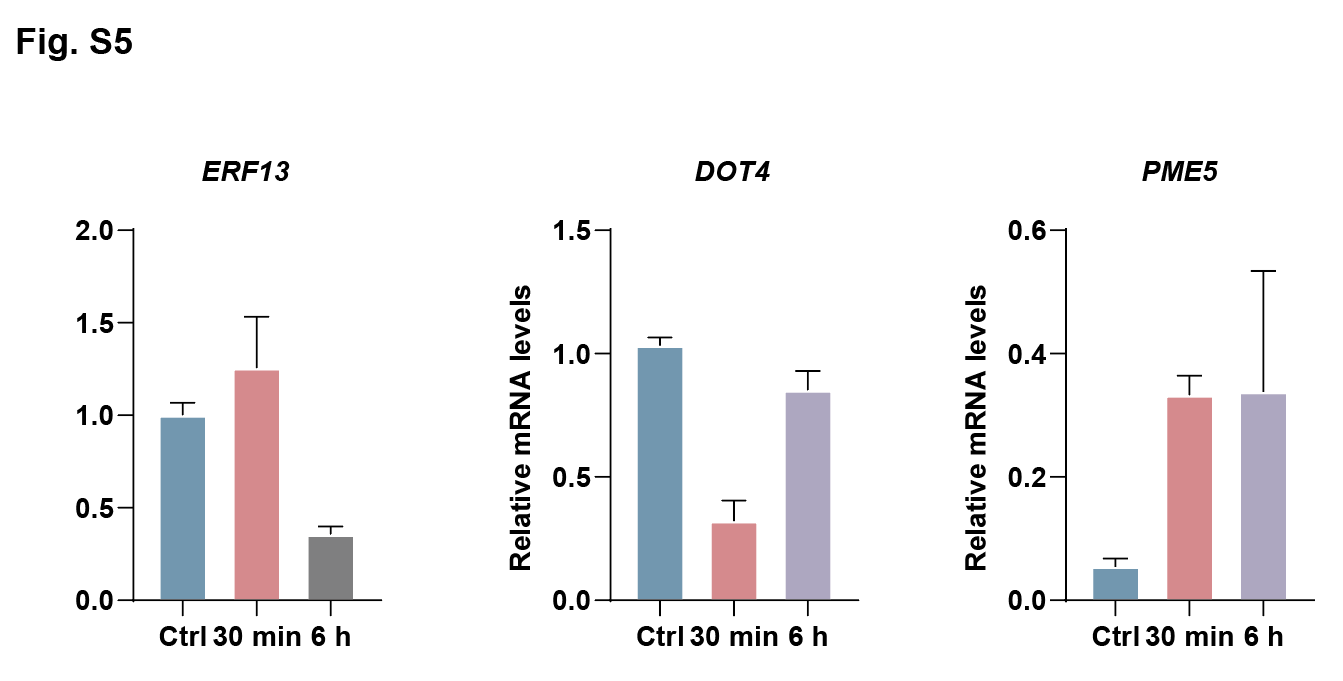
**

**Figure S5.** **Genes with altered mRNA expression levels at 30 minutes and 6 hours post-WCS417 infection.**
