# Supplementary material for: Integrated transcriptome and translatome analyses reveal the early regulatory network of Brassica napus roots in response to the growth-promoting rhizobacterium Pseudomonas simiae WCS417
Source: Research Square preprint supplement (doi:10.21203/rs.3.rs-7990582/v1), 2025-11-13
Supplement: Supplementary file 8 [file b81c9f83813127406dbec0f7.xlsx]

## Sheet: Sheet1
Table S5. significants GO items enrichment of RNC-seq differential translation translated genes.
ONTOLOGY	ID	Description	GeneRatio	BgRatio	pvalue	p.adjust	qvalue	geneID	Count	change	group	ordered
BP	GO:0009873	ethylene-activated signaling pathway	35/567	322/62797	7.61317615264174e-27	4.07685582973965e-24	3.09736061368004e-24	BnaC09G0247700ZS/BnaC07G0258200ZS/BnaA09G0213200ZS/BnaC09G0247600ZS/BnaC09G0054400ZS/BnaA09G0064800ZS/BnaA06G0336300ZS/BnaC08G0423200ZS/BnaC07G0144600ZS/BnaC03G0651000ZS/BnaA09G0423300ZS/BnaA08G0213700ZS/BnaA07G0094900ZS/BnaC05G0044000ZS/BnaC04G0601900ZS/BnaC04G0054300ZS/BnaA09G0720700ZS/BnaA05G0048700ZS/BnaA04G0283700ZS/BnaC04G0577200ZS/BnaC04G0308100ZS/BnaA04G0035900ZS/BnaC04G0004200ZS/BnaC03G0…	35	down	30m VS ctrl	1
BP	GO:0010104	regulation of ethylene-activated signaling pathway	15/567	98/62797	1.65159984314627e-14	2.5269477600138e-12	1.91982959210837e-12	BnaC09G0054400ZS/BnaA09G0064800ZS/BnaA06G0336300ZS/BnaC08G0423200ZS/BnaC04G0577200ZS/BnaC04G0308100ZS/BnaA04G0035900ZS/BnaC04G0004200ZS/BnaC03G0795800ZS/BnaC03G0410900ZS/BnaC01G0433800ZS/BnaA08G0015900ZS/BnaA03G0340700ZS/BnaC01G0363300ZS/BnaA01G0294600ZS	15	down	30m VS ctrl	1
BP	GO:0002252	immune effector process	17/567	296/62797	2.47930853461421e-09	2.04256880043986e-07	1.55182631356825e-07	BnaC09G0247600ZS/BnaC06G0453200ZS/BnaA07G0385400ZS/BnaA07G0228800ZS/BnaC06G0307400ZS/BnaC05G0038100ZS/BnaC04G0308100ZS/BnaA04G0035900ZS/BnaC03G0795800ZS/BnaC03G0410900ZS/BnaC01G0433800ZS/BnaA08G0015900ZS/BnaA03G0340700ZS/BnaC03G0251400ZS/BnaC03G0069800ZS/BnaA08G0148400ZS/BnaA04G0144200ZS	17	down	30m VS ctrl	1
BP	GO:0009867	jasmonic acid mediated signaling pathway	19/567	470/62797	8.37063832104471e-08	4.48247682091944e-06	3.40552811693029e-06	BnaC09G0247600ZS/BnaC08G0104600ZS/BnaC05G0259000ZS/BnaC04G0577200ZS/BnaC04G0308100ZS/BnaA04G0035900ZS/BnaC04G0015700ZS/BnaC03G0795800ZS/BnaC03G0410900ZS/BnaC01G0433800ZS/BnaA08G0015900ZS/BnaA03G0340700ZS/BnaC03G0391400ZS/BnaA03G0325600ZS/BnaA01G0371000ZS/BnaC03G0251400ZS/BnaC03G0192400ZS/BnaA03G0166200ZS/BnaA07G0141400ZS	19	down	30m VS ctrl	1
BP	GO:2000280	regulation of root development	9/567	300/62797	0.00178519	0.0134644	0.0102295	BnaC09G0621400ZS/BnaC09G0602900ZS/BnaA10G0284600ZS/BnaC06G0388100ZS/BnaC06G0376800ZS/BnaC04G0007200ZS/BnaC01G0103800ZS/BnaA01G0085500ZS/BnaA04G0298800ZS	9	down	30m VS ctrl	1
BP	GO:0009734	auxin-activated signaling pathway	9/567	322/62797	0.0028653	0.0202971	0.0154206	BnaC07G0386400ZS/BnaC01G0271000ZS/BnaA01G0214800ZS/BnaC06G0376800ZS/BnaC03G0746800ZS/BnaC02G0456100ZS/BnaA08G0186900ZS/BnaA07G0141400ZS/BnaA04G0236900ZS	9	down	30m VS ctrl	1
BP	GO:0043455	regulation of secondary metabolic process	8/567	263/62797	0.00289959	0.0202971	0.0154206	BnaC07G0475100ZS/BnaA03G0496900ZS/BnaC05G0100700ZS/BnaA06G0081500ZS/BnaC03G0519300ZS/BnaA06G0305600ZS/BnaA09G0050500ZS/BnaA05G0042800ZS	8	down	30m VS ctrl	1
BP	GO:0006417	regulation of translation	9/567	354/62797	0.00529121	0.0335319	0.0254756	BnaC09G0449600ZS/BnaC02G0109300ZS/BnaA10G0165800ZS/BnaA02G0090700ZS/BnaC08G0259500ZS/BnaA08G0247900ZS/BnaC03G0600600ZS/BnaA06G0190900ZS/BnaA01G0420800ZS	9	down	30m VS ctrl	1
BP	GO:0009694	jasmonic acid metabolic process	22/962	183/62797	1.30696116244262e-13	2.78942853812752e-11	2.13634102793252e-11	BnaC09G0572500ZS/BnaA10G0258400ZS/BnaC09G0267600ZS/BnaC09G0267300ZS/BnaA06G0393700ZS/BnaC08G0260600ZS/BnaA08G0247200ZS/BnaC06G0010000ZS/BnaA10G0066700ZS/BnaC03G0543200ZS/BnaC02G0536400ZS/BnaA09G0084000ZS/BnaA06G0285800ZS/BnaC03G0482200ZS/BnaA03G0389500ZS/BnaC02G0379200ZS/BnaA02G0279100ZS/BnaA08G0261700ZS/BnaA05G0446500ZS/BnaA03G0415700ZS/BnaA02G0355300ZS/BnaA02G0167200ZS	22	up	30m VS ctrl	1
BP	GO:0009867	jasmonic acid mediated signaling pathway	31/962	470/62797	1.79968587713262e-11	2.44430063676012e-09	1.87201774970637e-09	BnaC09G0528700ZS/BnaC02G0054000ZS/BnaA10G0223600ZS/BnaA03G0052500ZS/BnaC08G0473200ZS/BnaA08G0262000ZS/BnaC08G0251600ZS/BnaC07G0236000ZS/BnaA06G0431800ZS/BnaC06G0373700ZS/BnaC06G0299300ZS/BnaA07G0320600ZS/BnaA07G0266400ZS/BnaC05G0424600ZS/BnaC01G0408900ZS/BnaA05G0380600ZS/BnaC05G0361700ZS/BnaA05G0338600ZS/BnaA01G0303100ZS/BnaC05G0337700ZS/BnaC03G0025200ZS/BnaC02G0021300ZS/BnaA03G0020600ZS/BnaA02G0…	31	up	30m VS ctrl	1
BP	GO:0006749	glutathione metabolic process	22/962	255/62797	1.00599251212293e-10	1.00196854207444e-08	7.67378147843950e-09	Bnascaffold0027G0010400ZS/BnaC09G0043300ZS/BnaA09G0056000ZS/BnaA06G0350500ZS/BnaC08G0474600ZS/BnaA09G0619300ZS/BnaC08G0002800ZS/BnaA08G0320700ZS/BnaC07G0169100ZS/BnaA09G0446200ZS/BnaA07G0111900ZS/BnaC06G0303400ZS/BnaC02G0244300ZS/BnaA02G0185000ZS/BnaC05G0081400ZS/BnaC05G0081300ZS/BnaC04G0494200ZS/BnaC04G0185400ZS/BnaA03G0229900ZS/BnaC02G0244200ZS/BnaA07G0313900ZS/BnaA06G0278000ZS	22	up	30m VS ctrl	1
BP	GO:0009695	jasmonic acid biosynthetic process	11/962	109/62797	1.01065319096181e-06	2.96061934764106e-05	2.26745101873165e-05	BnaC09G0267600ZS/BnaC09G0267300ZS/BnaA06G0393700ZS/BnaC08G0260600ZS/BnaA08G0247200ZS/BnaC03G0482200ZS/BnaA03G0389500ZS/BnaC02G0379200ZS/BnaA02G0279100ZS/BnaA08G0261700ZS/BnaA02G0167200ZS	11	up	30m VS ctrl	1
BP	GO:0009850	auxin metabolic process	15/962	219/62797	1.79137333378445e-06	4.95613289013698e-05	3.79575597236588e-05	BnaC09G0590700ZS/BnaC03G0025600ZS/BnaA10G0273300ZS/BnaA03G0021000ZS/BnaC07G0541500ZS/BnaC03G0681300ZS/BnaA01G0008700ZS/BnaC06G0010000ZS/BnaA10G0066700ZS/BnaC05G0229800ZS/BnaC03G0633000ZS/BnaA10G0110000ZS/BnaA06G0021900ZS/BnaA05G0170700ZS/BnaA05G0446500ZS	15	up	30m VS ctrl	1
BP	GO:0009404	toxin metabolic process	30/962	259/62797	1.37683990580587e-17	3.42833136545662e-15	2.62565785545787e-15	Bnascaffold0027G0010400ZS/BnaC08G0474600ZS/BnaA09G0619300ZS/BnaC08G0002800ZS/BnaA08G0320700ZS/BnaC07G0541500ZS/BnaC03G0681300ZS/BnaA01G0008700ZS/BnaC07G0169100ZS/BnaA09G0446200ZS/BnaA07G0111900ZS/BnaC06G0303400ZS/BnaC02G0244300ZS/BnaA02G0185000ZS/BnaC05G0081400ZS/BnaC05G0081300ZS/BnaC04G0494200ZS/BnaC04G0185400ZS/BnaA03G0229900ZS/BnaC03G0772700ZS/BnaC01G0080800ZS/BnaA08G0154900ZS/BnaA03G0519500ZS…	30	up	30m VS ctrl	1
BP	GO:0042436	indole-containing compound catabolic process	7/962	51/62797	1.24751630721784e-05	0.00029584	0.000226575	BnaC07G0541500ZS/BnaC03G0681300ZS/BnaA01G0008700ZS/BnaC07G0169100ZS/BnaA09G0446200ZS/BnaA07G0111900ZS/BnaA05G0045500ZS	7	up	30m VS ctrl	1
BP	GO:2000031	regulation of salicylic acid mediated signaling pathway	5/567	87/62797	0.00118548	0.0104069	0.0079066	BnaC04G0577200ZS/BnaC04G0308100ZS/BnaA04G0035900ZS/BnaC03G0251400ZS/BnaA07G0141400ZS	5	down	30m VS ctrl	1
BP	GO:0009867	jasmonic acid mediated signaling pathway	42/1101	470/62797	1.17779742625985e-17	1.9891689865722e-15	1.56075378240048e-15	BnaC09G0437700ZS/BnaA10G0155400ZS/BnaC09G0247600ZS/BnaC07G0257800ZS/BnaA09G0212800ZS/BnaA06G0417600ZS/BnaC08G0473200ZS/BnaC08G0240100ZS/BnaA08G0262000ZS/BnaC08G0251600ZS/BnaC05G0160800ZS/BnaA08G0252900ZS/BnaA06G0133300ZS/BnaC08G0104600ZS/BnaA05G0323000ZS/BnaC07G0205300ZS/BnaC02G0553100ZS/BnaA07G0141400ZS/BnaC07G0143600ZS/BnaC05G0247500ZS/BnaA09G0422300ZS/BnaA07G0094200ZS/BnaC05G0259000ZS/BnaC03G0…	42	down	6h VS ctrl	2
BP	GO:0002252	immune effector process	33/1101	296/62797	5.59080016362755e-17	7.72546931701261e-15	6.06160438793303e-15	BnaC09G0584800ZS/BnaC03G0028700ZS/BnaA10G0268800ZS/BnaA03G0023700ZS/BnaC09G0247600ZS/BnaC07G0257800ZS/BnaA09G0212800ZS/BnaA06G0417600ZS/BnaC07G0506200ZS/BnaA08G0148400ZS/BnaC07G0364000ZS/BnaA06G0329700ZS/BnaC06G0453200ZS/BnaC06G0246700ZS/BnaC02G0323100ZS/BnaA07G0385400ZS/BnaA07G0228800ZS/BnaA02G0239700ZS/BnaC05G0485300ZS/BnaC04G0545800ZS/BnaC03G0200400ZS/BnaA04G0230300ZS/BnaA03G0172600ZS/BnaC04G0…	33	down	6h VS ctrl	2
BP	GO:0009873	ethylene-activated signaling pathway	34/1101	322/62797	1.00178372319238e-16	1.26892604937702e-14	9.95632419628919e-15	BnaC09G0247600ZS/BnaC07G0257800ZS/BnaA09G0212800ZS/BnaA06G0417600ZS/BnaC08G0152300ZS/BnaC01G0104800ZS/BnaA08G0105200ZS/BnaA01G0086200ZS/BnaC07G0258200ZS/BnaA09G0213200ZS/BnaA06G0417500ZS/BnaC07G0144600ZS/BnaC03G0651000ZS/BnaA09G0423300ZS/BnaA08G0213700ZS/BnaA07G0094900ZS/BnaC04G0601900ZS/BnaC04G0054300ZS/BnaA09G0720700ZS/BnaA05G0048700ZS/BnaA04G0283700ZS/BnaC04G0577200ZS/BnaC04G0466000ZS/BnaA04G0…	34	down	6h VS ctrl	2
BP	GO:0032101	regulation of response to external stimulus	33/1101	387/62797	1.33762057989356e-13	8.13273312575286e-12	6.38115417692382e-12	BnaC09G0101500ZS/BnaC07G0216700ZS/BnaA09G0101500ZS/BnaC08G0352000ZS/BnaC08G0104600ZS/BnaA05G0323000ZS/BnaC07G0506200ZS/BnaA08G0148400ZS/BnaC07G0451800ZS/BnaC07G0364000ZS/BnaA06G0329700ZS/BnaC07G0348500ZS/BnaC02G0501500ZS/BnaC07G0313700ZS/BnaC07G0205300ZS/BnaC02G0553100ZS/BnaA07G0141400ZS/BnaC06G0453200ZS/BnaC06G0246700ZS/BnaC02G0323100ZS/BnaA07G0385400ZS/BnaA07G0228800ZS/BnaA02G0239700ZS/BnaC06G0…	33	down	6h VS ctrl	2
BP	GO:0031349	positive regulation of defense response	22/1101	438/62797	1.32768721409683e-05	0.000231964	0.000182005	BnaC09G0247600ZS/BnaC07G0257800ZS/BnaA09G0212800ZS/BnaA06G0417600ZS/BnaC08G0352000ZS/BnaC08G0001400ZS/BnaA09G0712000ZS/BnaA09G0690300ZS/BnaC05G0411400ZS/BnaC03G0430400ZS/BnaA03G0354600ZS/BnaA01G0325300ZS/BnaC04G0515200ZS/BnaC03G0180000ZS/BnaA04G0207600ZS/BnaA04G0207500ZS/BnaC03G0795800ZS/BnaC03G0410900ZS/BnaA08G0015900ZS/BnaA03G0340700ZS/BnaC03G0519700ZS/BnaC02G0397100ZS	22	down	6h VS ctrl	2
BP	GO:0009734	auxin-activated signaling pathway	18/1101	322/62797	1.9596035029872e-05	0.000315325	0.000247412	Bnascaffold0025G0032600ZS/BnaC08G0303200ZS/BnaC08G0302800ZS/BnaC07G0386400ZS/BnaC01G0271000ZS/BnaA09G0468500ZS/BnaA03G0414300ZS/BnaA01G0214800ZS/BnaC07G0205300ZS/BnaC02G0553100ZS/BnaA07G0141400ZS/BnaC05G0025800ZS/BnaC03G0746800ZS/BnaC03G0686900ZS/BnaA08G0186900ZS/BnaC01G0018900ZS/BnaA06G0115900ZS/BnaC03G0345800ZS/BnaA04G0222600ZS	18	down	6h VS ctrl	2
BP	GO:1900424	regulation of defense response to bacterium	13/1101	187/62797	2.996718957926e-05	0.000457746	0.00035916	BnaC09G0101500ZS/BnaC07G0216700ZS/BnaA09G0101500ZS/BnaC08G0352000ZS/BnaC07G0313700ZS/BnaC06G0161900ZS/BnaC04G0392100ZS/BnaA07G0171200ZS/BnaA04G0109300ZS/BnaA02G0351200ZS/BnaC03G0519700ZS/BnaC02G0246900ZS/BnaA02G0186600ZS	13	down	6h VS ctrl	2
BP	GO:0009694	jasmonic acid metabolic process	10/1101	183/62797	0.00156725	0.0130176	0.0102139	BnaC09G0267600ZS/BnaA09G0228100ZS/BnaC08G0289600ZS/BnaA06G0166300ZS/BnaC08G0240500ZS/BnaA08G0261700ZS/BnaC02G0536400ZS/BnaC02G0267900ZS/BnaA02G0200800ZS/BnaA07G0318400ZS	10	down	6h VS ctrl	2
BP	GO:0006417	regulation of translation	15/1101	354/62797	0.00167723	0.0134744	0.0105723	BnaC09G0449600ZS/BnaC02G0109300ZS/BnaA10G0165800ZS/BnaA02G0090700ZS/BnaC06G0406500ZS/BnaC06G0278800ZS/BnaA07G0344900ZS/BnaA07G0252200ZS/BnaC05G0509500ZS/BnaA05G0451300ZS/BnaA01G0423400ZS/BnaC03G0600600ZS/BnaA06G0190900ZS/BnaC03G0489800ZS/BnaA02G0240000ZS	15	down	6h VS ctrl	2
BP	GO:0002253	activation of immune response	13/1101	298/62797	0.00258356	0.0188799	0.0148137	BnaC09G0247600ZS/BnaC07G0257800ZS/BnaA09G0212800ZS/BnaA06G0417600ZS/BnaC05G0411400ZS/BnaC03G0430400ZS/BnaA03G0354600ZS/BnaA01G0325300ZS/BnaC03G0795800ZS/BnaC03G0410900ZS/BnaA08G0015900ZS/BnaA03G0340700ZS/BnaC02G0397100ZS	13	down	6h VS ctrl	2
BP	GO:0042545	cell wall modification	28/1184	427/62797	1.76472323317043e-08	1.9494309315756e-06	1.51704277939212e-06	Bnascaffold0027G0040800ZS/Bnascaffold0025G0040200ZS/Bnascaffold0025G0034800ZS/Bnascaffold0027G0038900ZS/BnaC02G0439300ZS/BnaC09G0405600ZS/BnaA10G0131000ZS/BnaC08G0217600ZS/BnaA08G0278600ZS/BnaC07G0035800ZS/BnaC06G0360400ZS/BnaC02G0239200ZS/BnaC02G0238700ZS/BnaA07G0310300ZS/BnaC05G0511700ZS/BnaA05G0453600ZS/BnaC05G0219000ZS/BnaA09G0443800ZS/BnaC04G0071500ZS/BnaA05G0065000ZS/BnaA04G0254500ZS/BnaA03…	28	up	6h VS ctrl	2
BP	GO:0043455	regulation of secondary metabolic process	18/1184	263/62797	3.29234379399336e-06	0.000116073	9.03274613133677e-05	BnaC08G0483300ZS/BnaC05G0130700ZS/BnaA09G0625900ZS/BnaA06G0105600ZS/BnaC08G0014000ZS/BnaA10G0029300ZS/BnaA08G0313100ZS/BnaC07G0548300ZS/BnaC06G0457200ZS/BnaA07G0390300ZS/BnaC06G0086400ZS/BnaC04G0504300ZS/BnaC03G0554000ZS/BnaC01G0213000ZS/BnaA01G0165700ZS/BnaA06G0305600ZS/BnaA03G0028700ZS/BnaA02G0019300ZS	18	up	6h VS ctrl	2
BP	GO:0009851	auxin metabolic process	11/1184	121/62797	1.97668743670934e-05	0.000505507	0.000393384	Bnascaffold0025G0041000ZS/BnaC06G0372400ZS/BnaC02G0250300ZS/BnaC09G0052800ZS/BnaC07G0355900ZS/BnaA09G0063600ZS/BnaA06G0338300ZS/BnaC02G0078200ZS/BnaA06G0190300ZS/BnaC01G0100800ZS/BnaA01G0083200ZS	11	up	6h VS ctrl	2
BP	GO:0043090	amino acid import	6/1184	31/62797	2.18180029351059e-05	0.000547764	0.000426269	BnaC04G0407900ZS/BnaA09G0038700ZS/BnaA04G0120500ZS/BnaC04G0072900ZS/BnaA05G0065700ZS/BnaA03G0459600ZS	6	up	6h VS ctrl	2
BP	GO:0006757	ATP generation from ADP	12/1184	185/62797	0.000226222	0.00367499	0.00285987	BnaC09G0398100ZS/BnaC03G0133500ZS/BnaA03G0115300ZS/BnaC06G0022700ZS/BnaA10G0056100ZS/BnaC04G0340800ZS/BnaA07G0182100ZS/BnaA04G0068100ZS/BnaC01G0200700ZS/BnaA01G0157600ZS/BnaC01G0058900ZS/BnaA01G0050200ZS	12	up	6h VS ctrl	2
BP	GO:1900376	regulation of secondary metabolite biosynthetic process	9/1184	113/62797	0.000303035	0.00452368	0.00352032	BnaC08G0014000ZS/BnaA10G0029300ZS/BnaA08G0313100ZS/BnaC07G0548300ZS/BnaC04G0504300ZS/BnaC01G0213000ZS/BnaA01G0165700ZS/BnaA03G0028700ZS/BnaA02G0019300ZS	9	up	6h VS ctrl	2
BP	GO:0003333	amino acid transmembrane transport	13/1184	253/62797	0.00115301	0.0129831	0.0101034	BnaC08G0522500ZS/BnaA09G0659600ZS/BnaC04G0407900ZS/BnaA09G0038700ZS/BnaA04G0120500ZS/BnaC04G0072900ZS/BnaA05G0065700ZS/BnaC02G0481600ZS/BnaA02G0358000ZS/BnaA10G0250500ZS/BnaA05G0062600ZS/BnaA02G0157700ZS/BnaA01G0059100ZS	13	up	6h VS ctrl	2
BP	GO:0009404	toxin metabolic process	23/1101	259/62797	2.94278567524298e-10	1.49101140878978e-08	1.16988637545624e-08	Bnascaffold0418G0000200ZS/Bnascaffold0349G0000200ZS/BnaC03G0606500ZS/BnaA06G0184800ZS/Bnascaffold0026G0060100ZS/BnaC04G0590700ZS/BnaA04G0273000ZS/BnaC08G0475000ZS/BnaC05G0145000ZS/BnaC07G0339900ZS/BnaC04G0562300ZS/BnaC04G0080600ZS/BnaC03G0217300ZS/BnaA05G0071200ZS/BnaA04G0247200ZS/BnaA03G0185200ZS/BnaC06G0365000ZS/BnaC03G0173100ZS/BnaC02G0277100ZS/BnaA02G0206900ZS/BnaA07G0113500ZS/BnaA07G0111900Z…	23	down	6h VS ctrl	2
BP	GO:0009863	salicylic acid mediated signaling pathway	18/1101	203/62797	2.52100072059258e-08	8.33026325065375e-07	6.53614145636475e-07	BnaC08G0311700ZS/BnaA09G0475000ZS/BnaC07G0205300ZS/BnaC02G0553100ZS/BnaA07G0141400ZS/BnaC07G0143600ZS/BnaC05G0247500ZS/BnaA09G0422300ZS/BnaA07G0094200ZS/BnaC07G0009500ZS/BnaA07G0003500ZS/BnaC04G0577200ZS/BnaC04G0346200ZS/BnaA04G0064000ZS/BnaC03G0519700ZS/BnaC03G0390000ZS/BnaA03G0325200ZS/BnaA10G0277000ZS	18	down	6h VS ctrl	2
BP	GO:0009867	jasmonic acid mediated signaling pathway	59/1483	470/62797	2.22593623469458e-25	1.96772763147001e-22	1.43631464407135e-22	BnaC09G0528700ZS/BnaC02G0054000ZS/BnaA10G0223600ZS/BnaC09G0438300ZS/BnaC09G0437700ZS/BnaA10G0155400ZS/BnaC08G0473200ZS/BnaC08G0240100ZS/BnaA08G0262000ZS/BnaC08G0251600ZS/BnaC05G0160800ZS/BnaA08G0252900ZS/BnaA06G0133300ZS/BnaC07G0454200ZS/BnaC01G0172400ZS/BnaC07G0257800ZS/BnaA09G0212800ZS/BnaA06G0417600ZS/BnaA02G0306700ZS/BnaC07G0236000ZS/BnaC07G0205300ZS/BnaC02G0553100ZS/BnaA07G0141400ZS/BnaC06G0…	59	down	6h VS 30m	3
BP	GO:0032101	regulation of response to external stimulus	45/1483	387/62797	2.24692121892381e-18	2.64837114337154e-16	1.93314064168463e-16	BnaC09G0529900ZS/BnaC09G0528700ZS/BnaC02G0054000ZS/BnaA10G0223600ZS/BnaC09G0101500ZS/BnaC07G0216700ZS/BnaA09G0101500ZS/BnaA07G0150600ZS/BnaC08G0352000ZS/BnaC07G0506200ZS/BnaA03G0528500ZS/BnaC07G0451800ZS/BnaA03G0473300ZS/BnaC07G0364000ZS/BnaC07G0205300ZS/BnaC02G0553100ZS/BnaA07G0141400ZS/BnaC06G0401500ZS/BnaC06G0281900ZS/BnaC06G0246700ZS/BnaC02G0323100ZS/BnaA07G0228800ZS/BnaC06G0218000ZS/BnaC06G0…	45	down	6h VS 30m	3
BP	GO:0009694	jasmonic acid metabolic process	28/1483	183/62797	5.46561379222506e-15	5.68423834391406e-13	4.14912848871079e-13	BnaC09G0572500ZS/BnaA10G0258400ZS/BnaC09G0267600ZS/BnaA09G0228100ZS/BnaC09G0267300ZS/BnaC08G0473100ZS/BnaC08G0240500ZS/BnaA08G0261700ZS/BnaC08G0289600ZS/BnaA06G0166300ZS/BnaC08G0260600ZS/BnaA08G0247200ZS/BnaC06G0010000ZS/BnaA10G0066700ZS/BnaC03G0543200ZS/BnaC02G0536400ZS/BnaA06G0285800ZS/BnaA02G0403400ZS/BnaC03G0482200ZS/BnaA03G0389500ZS/BnaC02G0379200ZS/BnaA02G0279100ZS/BnaC02G0267900ZS/BnaA02G0…	28	down	6h VS 30m	3
BP	GO:0002252	immune effector process	27/1483	296/62797	3.13456674279598e-09	1.20476391331811e-07	8.79400189168848e-08	BnaC09G0584800ZS/BnaC03G0028700ZS/BnaA03G0023700ZS/BnaC07G0506200ZS/BnaA03G0528500ZS/BnaC07G0364000ZS/BnaC07G0257800ZS/BnaA09G0212800ZS/BnaA06G0417600ZS/BnaA02G0306700ZS/BnaC06G0246700ZS/BnaC02G0323100ZS/BnaA07G0228800ZS/BnaC05G0483400ZS/BnaC05G0459900ZS/BnaC05G0010300ZS/BnaA10G0008800ZS/BnaC04G0435300ZS/BnaA09G0594000ZS/BnaC04G0427300ZS/BnaA09G0601400ZS/BnaC03G0201000ZS/BnaA04G0231200ZS/BnaC03G0…	27	down	6h VS 30m	3
BP	GO:1900424	regulation of defense response to bacterium	19/1483	187/62797	1.21022710851516e-07	3.39631988548383e-06	2.47909512955654e-06	BnaC09G0101500ZS/BnaC07G0216700ZS/BnaA09G0101500ZS/BnaA07G0150600ZS/BnaC08G0352000ZS/BnaC06G0401500ZS/BnaC06G0281900ZS/BnaC06G0218000ZS/BnaC04G0392100ZS/BnaA07G0171200ZS/BnaA04G0109300ZS/BnaA02G0351200ZS/BnaC04G0284000ZS/BnaA04G0020300ZS/BnaC03G0552300ZS/BnaA06G0278900ZS/BnaC02G0089300ZS/BnaA09G0064300ZS/BnaA04G0064400ZS	19	down	6h VS 30m	3
BP	GO:0009850	auxin metabolic process	18/1483	219/62797	5.53932015510606e-06	0.000110503	8.06599908810321e-05	BnaC09G0590700ZS/BnaC03G0025600ZS/BnaA10G0273300ZS/BnaA03G0021000ZS/BnaC07G0541500ZS/BnaC03G0681300ZS/BnaA08G0192100ZS/BnaA03G0567100ZS/BnaA01G0008700ZS/BnaC07G0345500ZS/BnaA06G0349000ZS/BnaC06G0010000ZS/BnaA10G0066700ZS/BnaC05G0229800ZS/BnaA08G0272900ZS/BnaA06G0021900ZS/BnaA05G0170700ZS/BnaA05G0446500ZS	18	down	6h VS 30m	3
BP	GO:0009873	ethylene-activated signaling pathway	20/1483	322/62797	9.92974211956693e-05	0.00126301	0.000921913	BnaC07G0433500ZS/BnaC07G0257800ZS/BnaA09G0212800ZS/BnaA06G0417600ZS/BnaA02G0306700ZS/BnaC07G0102200ZS/BnaA07G0067900ZS/BnaC05G0459900ZS/BnaC04G0601900ZS/BnaC04G0054300ZS/BnaA09G0720700ZS/BnaA05G0048700ZS/BnaA04G0283700ZS/BnaC02G0277100ZS/BnaA02G0206900ZS/BnaC01G0362500ZS/BnaC01G0104800ZS/BnaA01G0086200ZS/BnaA07G0259300ZS/BnaA04G0064400ZS	20	down	6h VS 30m	3
BP	GO:0042545	cell wall modification	24/1483	427/62797	0.00010123	0.00126933	0.000926527	Bnascaffold0027G0005100ZS/BnaC07G0495600ZS/BnaC03G0773700ZS/BnaC01G0083800ZS/BnaA08G0155600ZS/BnaA01G0070700ZS/BnaC09G0018500ZS/BnaC07G0549400ZS/BnaC01G0001000ZS/BnaA06G0452100ZS/BnaA01G0001800ZS/BnaA01G0000700ZS/BnaC07G0541500ZS/BnaC03G0681300ZS/BnaA08G0192100ZS/BnaA03G0567100ZS/BnaA01G0008700ZS/BnaC05G0486200ZS/BnaA03G0323800ZS/BnaC03G0538500ZS/BnaC03G0201500ZS/BnaC02G0147500ZS/BnaA08G0288100ZS…	24	down	6h VS 30m	3
BP	GO:0009734	auxin-activated signaling pathway	16/1483	322/62797	0.00458572	0.0268462	0.019596	Bnascaffold0025G0032600ZS/BnaC08G0303200ZS/BnaC08G0302800ZS/BnaA09G0468500ZS/BnaA03G0414300ZS/BnaC07G0205300ZS/BnaC02G0553100ZS/BnaA07G0141400ZS/BnaC06G0234700ZS/BnaA07G0219300ZS/BnaC05G0142600ZS/BnaA06G0115900ZS/BnaC05G0025800ZS/BnaA08G0316300ZS/BnaC04G0010000ZS/BnaC03G0746800ZS	16	down	6h VS 30m	3
BP	GO:0043455	regulation of secondary metabolic process	18/841	263/62797	2.36291711110058e-08	2.11559845347206e-06	1.49071051430135e-06	BnaC08G0483300ZS/BnaC05G0130700ZS/BnaA09G0625900ZS/BnaA06G0105600ZS/BnaC06G0457200ZS/BnaA07G0390300ZS/BnaC04G0504400ZS/BnaC03G0554000ZS/BnaC03G0519300ZS/BnaC02G0550200ZS/BnaA06G0305600ZS/BnaC03G0035500ZS/BnaA03G0028700ZS/BnaA10G0029300ZS/BnaA08G0313100ZS/BnaA05G0042800ZS/BnaA03G0215800ZS/BnaA01G0165700ZS	18	up	6h VS 30m	3
BP	GO:0010065	primary meristem tissue development	8/841	39/62797	4.26789879798627e-08	3.31630592525515e-06	2.3367629633612e-06	BnaC07G0382400ZS/BnaA03G0410200ZS/BnaC03G0757300ZS/BnaC01G0058500ZS/BnaA08G0143700ZS/BnaA01G0049700ZS/BnaA06G0282700ZS/BnaA05G0399600ZS	8	up	6h VS 30m	3
BP	GO:0006739	NADP metabolic process	12/841	130/62797	2.09942630875025e-07	1.04427019727836e-05	7.3582232029882e-06	BnaC07G0153000ZS/BnaC03G0636900ZS/BnaA08G0221800ZS/BnaA07G0101100ZS/BnaC06G0179900ZS/BnaC04G0340800ZS/BnaA07G0182100ZS/BnaA04G0068100ZS/BnaC04G0415800ZS/BnaC04G0274300ZS/BnaA04G0013900ZS/BnaA07G0376400ZS	12	up	6h VS 30m	3
BP	GO:0009734	auxin-activated signaling pathway	17/841	322/62797	2.1769268069579e-06	5.3156594577172e-05	3.74556401809599e-05	BnaC09G0248300ZS/BnaC07G0537000ZS/BnaA03G0561500ZS/BnaC06G0376800ZS/BnaC06G0297700ZS/BnaA07G0322100ZS/BnaC06G0372400ZS/BnaC02G0250300ZS/BnaC04G0054200ZS/BnaA04G0283600ZS/BnaC03G0206500ZS/BnaA04G0236900ZS/BnaC03G0145500ZS/BnaC02G0145300ZS/BnaA02G0118100ZS/BnaC01G0507400ZS/BnaC01G0368600ZS	17	up	6h VS 30m	3
BP	GO:0003333	amino acid transmembrane transport	12/841	253/62797	0.000181036	0.00197668	0.00139282	BnaC07G0505800ZS/BnaC01G0070900ZS/BnaA03G0527900ZS/BnaA01G0059100ZS/BnaC04G0568000ZS/BnaC04G0072900ZS/BnaA05G0065700ZS/BnaC02G0481600ZS/BnaA09G0659600ZS/BnaA09G0038700ZS/BnaA03G0241700ZS/BnaA03G0182700ZS	12	up	6h VS 30m	3
BP	GO:0006754	ATP biosynthetic process	13/841	296/62797	0.000210817	0.00222935	0.00157086	BnaC09G0398100ZS/BnaC08G0343700ZS/BnaA09G0503100ZS/BnaC06G0179900ZS/BnaC04G0340800ZS/BnaA07G0182100ZS/BnaA04G0068100ZS/BnaC06G0022700ZS/BnaA10G0056100ZS/BnaC01G0200700ZS/BnaA01G0157600ZS/BnaC01G0058900ZS/BnaA01G0050200ZS	13	up	6h VS 30m	3
BP	GO:2000280	regulation of root development	13/841	300/62797	0.000240024	0.00240561	0.00169506	BnaC09G0621400ZS/BnaA10G0300300ZS/BnaC06G0430600ZS/BnaC06G0376800ZS/BnaC06G0297700ZS/BnaA07G0322100ZS/BnaC05G0346200ZS/BnaC04G0615900ZS/BnaA04G0298800ZS/BnaC03G0378500ZS/BnaA03G0315600ZS/BnaA08G0135000ZS/BnaA07G0294900ZS	13	up	6h VS 30m	3
BP	GO:0009956	radial pattern formation	7/841	107/62797	0.000617329	0.00524729	0.00369739	BnaC02G0145300ZS/BnaA02G0118100ZS/BnaC02G0005500ZS/BnaA02G0007900ZS/BnaA10G0159600ZS/BnaA10G0159500ZS/BnaA06G0282700ZS	7	up	6h VS 30m	3
BP	GO:0048829	root cap development	5/841	65/62797	0.00181221	0.0123543	0.00870518	BnaC08G0332600ZS/BnaA09G0493900ZS/BnaC06G0248500ZS/BnaA03G0241700ZS/BnaA03G0182700ZS	5	up	6h VS 30m	3
BP	GO:0009404	toxin metabolic process	44/1483	259/62797	1.27848512693716e-24	5.65090426106223e-22	4.12479675164461e-22	Bnascaffold0495G0000400ZS/BnaA03G0208600ZS/Bnascaffold0418G0000200ZS/Bnascaffold0349G0000200ZS/BnaC03G0606500ZS/BnaA06G0184800ZS/Bnascaffold0025G0009100ZS/BnaC07G0498000ZS/BnaC01G0080800ZS/BnaA03G0519500ZS/BnaA01G0068200ZS/BnaC08G0475000ZS/BnaC05G0145000ZS/BnaA06G0117600ZS/BnaC08G0474600ZS/BnaA09G0619300ZS/BnaC08G0002800ZS/BnaC07G0541500ZS/BnaC03G0681300ZS/BnaA08G0192100ZS/BnaA03G0567100ZS/BnaA01…	44	down	6h VS 30m	3
BP	GO:1900037	regulation of cellular response to hypoxia	5/841	16/62797	1.64531095258018e-06	5.0219377484436e-05	3.53859939322867e-05	BnaC03G0374800ZS/BnaA05G0496400ZS/BnaA05G0438100ZS/BnaA03G0312700ZS/BnaA07G0366800ZS	5	up	6h VS 30m	3
BP	GO:0042436	indole-containing compound catabolic process	10/1483	51/62797	2.77375280564245e-07	7.21175729467037e-06	5.2641191017301e-06	BnaC08G0106300ZS/BnaC07G0541500ZS/BnaC03G0681300ZS/BnaA08G0192100ZS/BnaA03G0567100ZS/BnaA01G0008700ZS/BnaC05G0214400ZS/BnaA09G0446200ZS/BnaA07G0113500ZS/BnaA07G0111900ZS	10	down	6h VS 30m	3
BP	GO:0009863	salicylic acid mediated signaling pathway	27/1483	203/62797	5.35128287383685e-13	5.25614895607975e-11	3.83665076217776e-11	BnaC09G0018500ZS/BnaC08G0311700ZS/BnaA09G0475000ZS/BnaC08G0271200ZS/BnaA08G0240400ZS/BnaC07G0433500ZS/BnaC07G0205300ZS/BnaC02G0553100ZS/BnaA07G0141400ZS/BnaC07G0009500ZS/BnaA07G0003500ZS/BnaC05G0483600ZS/BnaC03G0390000ZS/BnaA05G0430400ZS/BnaA03G0325200ZS/BnaC05G0409000ZS/BnaC05G0247500ZS/BnaA09G0422300ZS/BnaC04G0346200ZS/BnaA04G0064000ZS/BnaC03G0484900ZS/BnaC03G0024200ZS/BnaA03G0019200ZS/BnaA05G0…	27	down	6h VS 30m	3
