# Supplementary material for: Integrated transcriptome and translatome analyses reveal the early regulatory network of Brassica napus roots in response to the growth-promoting rhizobacterium Pseudomonas simiae WCS417
Source: Research Square preprint supplement (doi:10.21203/rs.3.rs-7990582/v1), 2025-11-13
Supplement: Supplementary file 9 [file ce05cecf14d1712cb5856fef.xlsx]

## Sheet: TE_WCS417_30m-TE_Control
Table S. Results of differential translation efficiency gene analysis.
Gene	TE_WCS417_30m_1	TE_WCS417_30m_2	TE_Control_1	TE_Control_2	pvalue	log2FC	DEGs	Ath	Symbol	Description
BnaC01G0035600ZS	0.844292	0.840424	0.521309	0.521214	3.6294e-05	0.692425	UP	AT4G35310	CPK5	calmodulin-domain protein kinase CDPK isoform 5 (CPK5)
BnaC03G0000600ZS	0.649103	0.651063	0.218257	0.223532	4.29726e-05	1.55726	UP	AT1G01560	MPK11	member of MAP Kinase
BnaC09G0331100ZS	0.430509	0.433683	0.110501	0.10706	5.23999e-05	1.98993	UP	AT4G24520	ATR1	Encodes a cyp450 reductase likely to be involved in phenylpropanoid metabolism.
BnaC08G0143100ZS	1.69473	1.70227	1.0519	1.0462	5.29049e-05	0.695182	UP	AT4G16500	CYS4	Cystatin/monellin superfamily protein
BnaA06G0027500ZS	0.751618	0.753239	0.478289	0.474204	6.32957e-05	0.659847	UP	AT1G50740	--	Transmembrane proteins 14C
BnaC09G0435100ZS	0.667478	0.669736	0.284279	0.290429	7.38202e-05	1.21833	UP	AT5G60100	PRR3	Encodes pseudo-response regulator 3 (APRR3/PRR3). PRR3 transcript levels vary in a circadian pattern with peak expression at dusk under long and short day conditions. PRR3 affects the period of the circadian clock and seedlings with reduced levels of PRR3 have shorter periods, based on transcriptional assays of clock-regulated genes. PRR3 is expressed in the vasculature of cotyledons and leaves w…
BnaC05G0180400ZS	0.331009	0.329759	0.152049	0.155053	8.4627e-05	1.10543	UP	AT2G44050	COS1	6,7-dimethyl-8-ribityllumazine synthase / DMRL synthase / lumazine synthase / riboflavin synthase [Arabidopsis thaliana]. Acts in the jasmonic acid signaling pathway.
BnaC06G0246700ZS	1.1023	1.10286	0.429991	0.443908	0.000109456	1.33535	UP	AT1G80840	WRKY40	Pathogen-induced transcription factor. Binds W-box sequences in vitro. Forms protein complexes with itself and with WRKY40 and WRKY60. Coexpression with WRKY18 or WRKY60 made plants more susceptible to both P. syringae and B. cinerea. WRKY18, WRKY40, and WRKY60 have partially redundant roles in response to the hemibiotrophic bacterial pathogen Pseudomonas syringae and the necrotrophic fungal path…
BnaA06G0133300ZS	0.50941	0.509812	0.331776	0.327846	0.000120657	0.627758	UP	AT1G19180	TIFY10A	JAZ1 is a nuclear-localized protein involved in jasmonate signaling. JAZ1 transcript levels rise in response to a jasmonate stimulus. JAZ1 can interact with the COI1 F-box subunit of an SCF E3 ubiquitin ligase in a yeast-two-hybrid assay only in the presence of jasmonate-isoleucine (JA-ILE) or coronatine. Application of jasmonate methyl ester to Arabidopsis roots reduces the levels of a JAZ1:GUS …
BnaC06G0128400ZS	0.770838	0.777056	0.494533	0.495782	0.000129382	0.644347	UP	AT1G53320	TLP7	Member of TLP family
BnaC09G0463700ZS	0.713739	0.720003	0.442156	0.443699	0.00013862	0.694643	UP	AT5G19990	RPT6A	26S proteasome AAA-ATPase subunit
BnaC09G0334700ZS	0.466403	0.471699	0.211179	0.21412	0.000139516	1.14127	UP	AT1G65481	--	--
BnaC07G0506200ZS	0.743778	0.743502	0.451896	0.443882	0.00018372	0.731462	UP	AT4G31800	WRKY18	Pathogen-induced transcription factor. Binds W-box sequences in vitro. Forms protein complexes with itself and with WRKY40 and WRKY60. Constitutive expression of WRKY18 enhanced resistance to P. syringae, but its coexpression with WRKY40 or WRKY60 made plants more susceptible to both P. syringae and B. cinerea. WRKY18, WRKY40, and WRKY60 have partially redundant roles in response to the hemibiotr…
BnaA03G0127000ZS	0.772646	0.774568	0.413316	0.403535	0.00018624	0.921528	UP	AT5G54165	--	--
BnaA09G0024600ZS	1.17515	1.18427	0.709429	0.698865	0.00021523	0.744478	UP	AT4G02330	PME41	Encodes a pectin methylesterase that is sensitive to chilling stress and brassinosteroid regulation.
BnaA09G0413800ZS	0.613083	0.607343	0.369899	0.374522	0.000239629	0.713195	UP	AT1G29990	PFD6	Encodes a cytoplastic protein with similarity to yeast prefoldin6, a subunit of the prefoldin complex. The PFD complex is thought to function along with the TCP ring complex to properly fold microtubule proteins.
BnaA04G0190400ZS	0.943571	0.943438	0.623937	0.613225	0.000271687	0.609066	UP	AT2G29460	GSTU4	Encodes glutathione transferase belonging to the tau class of GSTs. Naming convention according to Wagner et al. (2002).
BnaA03G0553100ZS	1.09021	1.10275	0.568027	0.580546	0.000287811	0.93304	UP	AT4G35985	--	Senescence/dehydration-associated protein-related
BnaA06G0156200ZS	0.595125	0.583999	0.26333	0.262204	0.00029262	1.16586	UP	AT3G49720	CGR2	--
BnaC01G0087700ZS	0.671228	0.661853	0.298256	0.289352	0.000300662	1.18184	UP	AT5G63820	--	Protein of unknown function (DUF626)
BnaC02G0261800ZS	0.668899	0.677493	0.367783	0.361017	0.000313499	0.885503	UP	AT1G72020	--	--
BnaC03G0748300ZS	0.437041	0.433157	0.247929	0.253239	0.000317587	0.796051	UP	AT4G34150	--	Calcium-dependent lipid-binding (CaLB domain) family protein
BnaA10G0036400ZS	0.569719	0.577661	0.333359	0.336953	0.000333734	0.775439	UP	AT2G32210	AthCYSTM6	--
BnaA08G0267100ZS	0.712979	0.710365	0.463353	0.4719	0.000335098	0.605856	UP	AT1G15780	NRB4	--
BnaA03G0528400ZS	0.841315	0.827146	0.390222	0.397923	0.000335429	1.08199	UP	AT4G31780	UGT81A1	Encodes an A-type monogalactosyldiacylglycerol (MGDG) synthase. It represents the isoform responsible for the bulk of MGDG synthesis in Arabidopsis.
BnaC05G0317600ZS	0.504186	0.497175	0.295196	0.298003	0.000342138	0.755375	UP	AT1G47330	--	CBS domain-containing protein with a domain of unknown function (DUF21)
BnaC09G0175400ZS	1.01382	1.03245	0.463748	0.473189	0.000354257	1.12698	UP	AT1G61890	--	MATE efflux family protein
BnaA03G0376100ZS	1.22536	1.20348	0.627488	0.623876	0.00035441	0.956763	UP	AT3G23390	RPL36aA	Zinc-binding ribosomal protein family protein
BnaA07G0150600ZS	0.441383	0.448151	0.130859	0.120874	0.00035747	1.82115	UP	AT5G66210	CPK28	member of Calcium Dependent Protein Kinase
BnaC04G0607100ZS	0.772095	0.785809	0.336987	0.346371	0.000360857	1.18889	UP	AT2G45750	--	S-adenosyl-L-methionine-dependent methyltransferases superfamily protein
BnaA07G0363400ZS	0.585189	0.588118	0.220851	0.234375	0.000371134	1.36593	UP	AT1G76670	URGT1	Nucleotide-sugar transporter family protein
BnaA09G0095100ZS	0.850814	0.873077	0.266192	0.271645	0.000373252	1.68043	UP	AT5G67340	PUB2	ARM repeat superfamily protein
BnaA02G0291600ZS	1.18956	1.16271	0.469286	0.475823	0.000385656	1.3155	UP	AT4G36150	--	Disease resistance protein (TIR-NBS-LRR class) family
BnaA09G0121600ZS	0.699744	0.691589	0.439956	0.433839	0.00038775	0.671101	UP	AT1G64760	ZET	O-Glycosyl hydrolases family 17 protein
BnaC07G0330100ZS	0.685189	0.694003	0.414816	0.408057	0.000398343	0.745082	UP	AT5G48570	ROF2	Encodes one of the 36 carboxylate clamp (CC)-tetratricopeptide repeat (TPR) proteins (Prasad 2010, Pubmed ID: 20856808) with potential to interact with Hsp90/Hsp70 as co-chaperones.
BnaC05G0189400ZS	0.509023	0.514641	0.331197	0.326403	0.000406725	0.63846	UP	AT1G21880	LYP2	Encodes a lysin-motif protein mediating bacterial peptidoglycan sensing and immunity to bacterial infection. Induction of chitin-responsive genes by chitin treatment is not blocked in the mutant.
BnaC08G0459000ZS	0.973037	0.951591	0.407273	0.398982	0.000422422	1.25527	UP	AT2G20490	NOP10	nucleolar RNA-binding Nop10p family protein
BnaC07G0462700ZS	1.22922	1.25908	0.254871	0.281737	0.000423366	2.21322	UP	AT4G25225	--	--
BnaC09G0336700ZS	1.02607	1.0187	0.660785	0.64738	0.000430968	0.644395	UP	AT5G62300	--	Ribosomal protein S10p/S20e family protein
BnaC08G0485600ZS	0.932745	0.91715	0.547996	0.546061	0.000431977	0.757755	UP	AT1G15270	--	Translation machinery associated TMA7
BnaC04G0146100ZS	0.747726	0.752627	0.472568	0.461828	0.000434783	0.683195	UP	AT2G32520	--	alpha/beta-Hydrolases superfamily protein
BnaC09G0102800ZS	0.518617	0.525868	0.343135	0.340771	0.000447004	0.610922	UP	AT5G66040	STR16	Encodes a protein with thiosulfate sulfurtransferase/rhodanese activity in vitro, however, it is likely to use a substrate other than thiosulfate or 3-mercaptopyruvate in vivo.
BnaA02G0138400ZS	0.570991	0.562024	0.323427	0.328545	0.000460302	0.797286	UP	AT5G53570	RabGAP22	Ypt/Rab-GAP domain of gyp1p superfamily protein
BnaA06G0399400ZS	1.05739	1.07534	0.634723	0.639084	0.000462009	0.743553	UP	AT2G03220	MUR2	member of Glycosyltransferase Family- 37
BnaA07G0384700ZS	0.526018	0.529606	0.317946	0.326199	0.000477973	0.712639	UP	AT1G80950	LPEAT1	Phospholipid/glycerol acyltransferase family protein
BnaC03G0237200ZS	0.852945	0.856767	0.539206	0.525599	0.000479958	0.683165	UP	AT2G27030	CAM5	encodes a calmodulin that has higher affinity to kinesin-like calmodulin binding motor protein than CAM4 or CAM6.
BnaC04G0080600ZS	0.713219	0.722956	0.40449	0.414008	0.000485605	0.81118	UP	AT2G38470	WRKY33	Member of the plant WRKY transcription factor family. Regulates the antagonistic relationship between defense pathways mediating responses to P. syringae and necrotrophic fungal pathogens. Located in nucleus. Involved in response to various abiotic stresses - especially salt stress.
BnaA03G0143100ZS	0.637427	0.628164	0.243668	0.257841	0.000490691	1.33546	UP	AT5G50810	TIM8	Encodes a small zinc finger-like protein that is a component of the mitochondrial protein import apparatus.
BnaC07G0333200ZS	0.570376	0.580376	0.253593	0.242984	0.000496295	1.21249	UP	AT5G48970	--	Encodes a mitochondrial thiamin diphosphate carrier.
BnaA10G0175600ZS	0.545105	0.537761	0.342366	0.347276	0.000504313	0.650936	UP	AT5G20230	SAG14	Al-stress-induced gene
BnaA01G0177900ZS	0.713739	0.722603	0.377105	0.38931	0.000506589	0.906201	UP	AT4G17350	FL5	Plant protein of unknown function (DUF828) with plant pleckstrin homology-like region
BnaC01G0478400ZS	0.983458	1.00079	0.570808	0.578171	0.000507691	0.788236	UP	AT3G10300	--	Calcium-binding EF-hand family protein
BnaC08G0395900ZS	0.304742	0.309544	0.162445	0.166815	0.00051842	0.899684	UP	AT3G60450	--	Phosphoglycerate mutase family protein
BnaA07G0223900ZS	1.09584	1.07305	0.580742	0.576478	0.000524677	0.906297	UP	AT1G79880	La2	RNA recognition motif (RRM)-containing protein
BnaC03G0295300ZS	1.07699	1.09245	0.702493	0.710736	0.000536279	0.618328	UP	AT4G08960	--	phosphotyrosyl phosphatase activator (PTPA) family protein
BnaA06G0201200ZS	1.84482	1.85491	1.21065	1.23964	0.000603138	0.594465	UP	ATCG00040	MATK	Encodes a maturase located in the trnK intron in the chloroplast genome.
BnaA09G0071600ZS	0.641563	0.649071	0.29565	0.279707	0.000606461	1.16555	UP	AT5G23580	CPK12	unique family of enzymes containing a single polypeptide chain with a kinase domain at the amino terminus and a putative calcium-binding EF hands structure at the carboxyl terminus; recombinant protein is fully active and induced by Ca2+
BnaC09G0304800ZS	0.856851	0.842615	0.539976	0.545797	0.000627457	0.646359	UP	AT4G10100	SIR5	molybdenum cofactor synthesis family protein, similar to Molybdenum cofactor synthesis protein 2 small subunit (Molybdopterin- synthase small subunit) (MOCS2A) (MOCO1-A) (Swiss-Prot:O96033) (Homo sapiens); contains TIGRFAM TIGR01682: molybdopterin converting factor, subunit 1; sir loss-of-function mutants are resistant to sirtinol, a modulator of auxin signaling.
BnaC08G0479000ZS	0.55513	0.571583	0.211179	0.203924	0.000637862	1.44058	UP	AT1G16420	MCP2e	Encodes a metacaspase (cysteine-type endopeptidase) that is involved in promoting programmed cell death in response to hydrogen peroxide (H2O2), UV light, and methyl viologen (MV). Transcript levels rise in response to UV-C, H2O2, and MV. In vitro assays demonstrate that this enzyme has a preference for cleaving after an arginine residue, and it has a pH optimum of 8.0.
BnaA08G0285400ZS	0.743195	0.736247	0.387021	0.370085	0.000641637	0.966486	UP	--	--	--
BnaC06G0051000ZS	0.806905	0.797035	0.49358	0.480839	0.000654865	0.719006	UP	AT1G50740	--	Transmembrane proteins 14C
BnaA04G0026000ZS	1.24128	1.21879	0.527947	0.555127	0.00065583	1.18357	UP	AT1G65870	--	Disease resistance-responsive (dirigent-like protein) family protein
BnaC05G0264800ZS	0.581565	0.590928	0.351965	0.344122	0.000656656	0.75224	UP	AT2G34730	--	myosin heavy chain-related
BnaC02G0179100ZS	0.747726	0.75118	0.338683	0.316955	0.000680015	1.19294	UP	AT5G53090	--	NAD(P)-binding Rossmann-fold superfamily protein
BnaA01G0167400ZS	0.965029	0.947828	0.594259	0.585255	0.000700197	0.697537	UP	AT4G27450	HUP54	Aluminium induced protein with YGL and LRDR motifs
BnaC08G0513900ZS	0.539058	0.527108	0.277211	0.270318	0.000706786	0.961423	UP	AT1G11310	PMR2	A member of a large family of seven-transmembrane domain proteins specific to plants, homologs of the barley mildew resistance locus o (MLO) protein. The Arabidopsis genome contains 15 genes encoding MLO proteins, with localization in plasma membrane. Phylogenetic analysis revealed four clades of closely-related AtMLO genes. ATMLO2 belongs to the clade IV, with AtMLO3, AtMLO6 and AtMLO12. The gen…
BnaC05G0093700ZS	0.767461	0.788674	0.336987	0.326279	0.000707557	1.23031	UP	AT1G11740	--	ankyrin repeat family protein
BnaA05G0067400ZS	0.746095	0.743563	0.406113	0.386965	0.000767981	0.909447	UP	AT2G39270	--	P-loop containing nucleoside triphosphate hydrolases superfamily protein
BnaC03G0735500ZS	0.815701	0.80791	0.422358	0.401476	0.000775706	0.978782	UP
BnaA08G0277400ZS	1.42748	1.38499	0.50358	0.529666	0.000784317	1.44465	UP	AT1G12805	--	nucleotide binding
BnaC09G0039300ZS	0.958718	0.96224	0.523655	0.547421	0.000798213	0.842765	UP	AT3G04320	--	Kunitz family trypsin and protease inhibitor protein
BnaA09G0478500ZS	0.65664	0.643787	0.359222	0.348268	0.000810151	0.878203	UP	AT3G51360	--	Eukaryotic aspartyl protease family protein
BnaA08G0043900ZS	0.772355	0.771735	0.422358	0.441992	0.000834113	0.83707	UP	AT1G47720	OSB1	Encodes an organellar single-strand DNA binding protein, located in mitochondria, controls the stoichiometry of alternative mitochondrial DNA forms generated by homologous recombination.
BnaA02G0272000ZS	1.35235	1.38499	0.439956	0.481771	0.000852553	1.57036	UP	AT4G10120	SPSC	--
BnaC09G0151600ZS	0.63309	0.648138	0.380533	0.377528	0.000859238	0.757141	UP	--	--	--
BnaA04G0042700ZS	0.787526	0.801083	0.500482	0.489299	0.000860127	0.682584	UP	AT3G06110	MKP2	Encodes a nuclear-localized MAP kinase phosphatase. Plants with reduced levels of MKP2 transcripts are hypersensitive to ozone and ozone-mediated activation of MPK3 and MPK6 is prolonged in these plants.
BnaA05G0457900ZS	1.0232	1.05523	0.472953	0.462718	0.00086445	1.15142	UP	AT3G07470	--	Protein of unknown function, DUF538
BnaA01G0086100ZS	0.820137	0.836737	0.514788	0.506137	0.000865253	0.698588	UP	AT4G28400	--	Protein phosphatase 2C family protein
BnaC02G0323100ZS	0.651086	0.66377	0.347843	0.360519	0.000873032	0.892346	UP	AT1G80840	WRKY40	Pathogen-induced transcription factor. Binds W-box sequences in vitro. Forms protein complexes with itself and with WRKY40 and WRKY60. Coexpression with WRKY18 or WRKY60 made plants more susceptible to both P. syringae and B. cinerea. WRKY18, WRKY40, and WRKY60 have partially redundant roles in response to the hemibiotrophic bacterial pathogen Pseudomonas syringae and the necrotrophic fungal path…
BnaA06G0121200ZS	1.39088	1.38499	0.234643	0.301107	0.000886024	2.3733	UP	AT1G17650	GR2	Glyoxylate reductase located in chloroplasts.
BnaC04G0542100ZS	0.528214	0.527371	0.324989	0.312483	0.000897588	0.727609	UP	AT2G35680	PTPMT1	Phosphotyrosine protein phosphatases superfamily protein
BnaA03G0038700ZS	0.548186	0.567549	0.194039	0.203854	0.000913273	1.48754	UP	AT5G10100	TPPI	Haloacid dehalogenase-like hydrolase (HAD) superfamily protein
BnaC04G0346300ZS	0.642365	0.642585	0.407437	0.39271	0.000921765	0.683374	UP	AT3G52390	--	TatD related DNase
BnaC04G0039700ZS	0.799454	0.791646	0.530194	0.515327	0.000945985	0.605803	UP	AT2G43120	PRN2	RmlC-like cupins superfamily protein
BnaC04G0611400ZS	1.02803	1.00502	0.642171	0.643051	0.000946957	0.661629	UP	AT2G46600	--	Calcium-binding EF-hand family protein
BnaA10G0144400ZS	0.768642	0.745763	0.279501	0.25954	0.00096764	1.49028	UP	AT5G58900	DIV1	Homeodomain-like transcriptional regulator
BnaA09G0255200ZS	0.642486	0.639595	0.377446	0.393282	0.000989561	0.734192	UP	AT4G10790	PUX10	UBX domain-containing protein
BnaA05G0154200ZS	1.15811	1.14903	0.757696	0.780243	0.000996914	0.58511	UP	AT1G55450	--	S-adenosyl-L-methionine-dependent methyltransferases superfamily protein
BnaA02G0041500ZS	0.638843	0.653715	0.370825	0.37974	0.00102188	0.784179	UP	AT5G11670	NADP-ME2	The malic enzyme (EC 1.1.1.40) encoded by AtNADP-ME2 is presumably a cytosolic enzyme involved in malate metabolism and possibly assisting the oxidative pentose phosphate pathway. AtNADP-ME2 counts for the major part of NADP-ME activity in mature tissues of Arabidopsis.
BnaC01G0479800ZS	0.734345	0.75295	0.336987	0.354678	0.00103956	1.10454	UP	AT3G09830	PCRK1	Protein kinase superfamily protein
BnaA09G0037400ZS	0.516285	0.533831	0.258228	0.256856	0.00108025	1.02767	UP	AT3G26980	MUB4	membrane-anchored ubiquitin-fold protein 4 precursor
BnaC01G0121600ZS	0.563478	0.56781	0.206825	0.182751	0.00108581	1.53799	UP	AT4G18950	BHP	Integrin-linked protein kinase family
BnaC05G0183200ZS	0.570991	0.594325	0.226263	0.228556	0.00108719	1.35736	UP	AT1G21320	NSRb	nucleotide binding;nucleic acid binding
BnaC07G0495700ZS	0.842215	0.861771	0.437892	0.456209	0.00109277	0.930403	UP	AT4G30280	XTH18	Encodes a xyloglucan endotransglucosylase/hydrolase with only only the endotransglucosylase (XET; EC 2.4.1.207) activity towards xyloglucan and non-detectable endohydrolytic (XEH; EC 3.2.1.151) activity. Expressed in the mature or basal regions of both the main and lateral roots, but not in the tip of these roots where cell division occurs.
BnaC07G0363700ZS	0.180213	0.184052	0.0731355	0.0790112	0.00109298	1.25952	UP	AT5G24620	--	Pathogenesis-related thaumatin superfamily protein
BnaA03G0145800ZS	0.499617	0.484001	0.201862	0.212602	0.00110699	1.24685	UP	AT2G30270	--	Protein of unknown function (DUF567)
BnaA03G0530300ZS	0.702216	0.682795	0.399059	0.396123	0.00110701	0.800542	UP	AT4G32040	KNAT5	A member of Class II KN1-like homeodomain transcription factors factors (together with KNAT3 and KNAT4), with greatest homology to the maize knox1 homeobox protein. Regulates photomorphogenic responses and represses late steps in gibberellin biosynthesis. KNAT5 promoter activity showed cell-type specific pattern along longitudinal root axis, primarily in the epidermis of the distal end of primary…
BnaC01G0423600ZS	0.382159	0.379351	0.169697	0.155278	0.0011305	1.22853	UP	AT3G16220	--	Predicted eukaryotic LigT
BnaC03G0169500ZS	0.784828	0.765685	0.43781	0.449389	0.00113569	0.805417	UP	AT2G30250	WRKY25	member of WRKY Transcription Factor; Group I. Located in nucleus. Involved in response to various abiotic stresses - especially salt stress.
BnaA06G0101500ZS	0.766974	0.766214	0.462209	0.440946	0.00113855	0.763489	UP	AT1G15210	PDR7	pleiotropic drug resistance 7
BnaC03G0013800ZS	0.442923	0.454217	0.281983	0.280556	0.00115546	0.673378	UP	AT5G03330	--	Cysteine proteinases superfamily protein
BnaC04G0329400ZS	0.625273	0.60886	0.327059	0.315217	0.00116734	0.942231	UP	AT3G54000	--	--
BnaA05G0011500ZS	0.557396	0.541684	0.258107	0.269758	0.00117049	1.05805	UP	AT2G46780	--	RNA-binding (RRM/RBD/RNP motifs) family protein
BnaA09G0682700ZS	0.506858	0.510259	0.250906	0.267651	0.00117254	0.971913	UP	AT1G04590	--	--
BnaA08G0194300ZS	0.704588	0.71121	0.42559	0.406678	0.00117714	0.766497	UP	AT4G39675	--	--
BnaA08G0247200ZS	0.810067	0.8379	0.355254	0.370378	0.00117743	1.18338	UP	AT1G20510	OPCL1	OPC-8:0 CoA ligase1
BnaC06G0381600ZS	1.30721	1.27606	0.828471	0.81968	0.00119634	0.648351	UP	AT1G71430	--	--
BnaC05G0406300ZS	0.591843	0.581135	0.359374	0.347063	0.00122095	0.731542	UP	AT3G19030	--	--
BnaC01G0185100ZS	0.356869	0.36933	0.185245	0.185297	0.00122531	0.970733	UP	AT5G12380	ANNAT8	annexin 8
BnaC04G0182900ZS	0.961362	0.932652	0.503144	0.489937	0.00122815	0.931464	UP	AT2G29660	--	zinc finger (C2H2 type) family protein
BnaC08G0244700ZS	0.801391	0.771961	0.367963	0.368924	0.00123691	1.09433	UP	AT1G18290	--	--
BnaA02G0161300ZS	1.45866	1.49656	0.843904	0.866084	0.0012411	0.789277	UP	AT3G44860	FAMT	Encodes a farnesoic acid carboxyl-O-methyltransferase.
BnaC04G0109700ZS	0.628275	0.628817	0.286928	0.261956	0.00124158	1.19552	UP	AT2G35530	bZIP16	Encodes a G group bZIP transcription factor family member that can bind cis elements with an ACGT core, such as G-box, Hex, C-box and As-1. The protein is localized in the nucleus and can homodimerize and can heterodimerize with other G group members.
BnaC01G0031400ZS	0.700702	0.680115	0.392576	0.396585	0.00125428	0.807131	UP	AT4G35860	GB2	GTP-binding protein ATGB2
BnaC02G0227900ZS	0.702409	0.697904	0.446522	0.463535	0.00128622	0.62172	UP	AT1G68670	NIGT1.2	myb-like transcription factor family protein
BnaC02G0248300ZS	0.804715	0.802711	0.464646	0.439393	0.00129451	0.830296	UP	AT1G70410	CA4	Encodes a putative beta-carbonic anhydrase betaCA4. Together with betaCA1 (At3g01500) regulates CO2-controlled stomatal movements in guard cells.
BnaC08G0279600ZS	0.54253	0.5406	0.267913	0.286966	0.00131155	0.964962	UP	AT1G24145	--	--
BnaA10G0282700ZS	0.569916	0.554805	0.353437	0.350715	0.00133008	0.675609	UP	AT5G04510	PDK1	Encodes 3-phosphoinositide-dependent protein kinase that contains pleckstrin homology domain and binds 3-phosphoinositides. It activates the protein kinase AGC2-1 in a phosphatidic acid dependent manner. Phosphorylates S6K1. Interacts with PID, and transphosphorylation by PDK1 increases PID autophosphorylation.
BnaA03G0179900ZS	0.83092	0.808257	0.490192	0.497487	0.00133278	0.730856	UP	AT5G59970	--	Histone superfamily protein
BnaA03G0069900ZS	0.760347	0.741558	0.493414	0.490933	0.00133821	0.609555	UP	AT5G16470	MBS2	zinc finger (C2H2 type) family protein
BnaC02G0189000ZS	0.758095	0.789295	0.348982	0.348757	0.00134572	1.14908	UP	AT5G51960	--	--
BnaA09G0598200ZS	0.72656	0.757179	0.210416	0.184071	0.00137234	1.91119	UP	AT2G21510	--	DNAJ heat shock N-terminal domain-containing protein
BnaA03G0169600ZS	0.441838	0.448472	0.0879912	0.112695	0.00137294	2.14937	UP	AT2G35530	bZIP16	Encodes a G group bZIP transcription factor family member that can bind cis elements with an ACGT core, such as G-box, Hex, C-box and As-1. The protein is localized in the nucleus and can homodimerize and can heterodimerize with other G group members.
BnaA08G0312100ZS	0.577788	0.573959	0.19798	0.169042	0.0013808	1.64988	UP	AT5G40170	RLP54	receptor like protein 54
Bnascaffold2276G0000200ZS	0.522475	0.52534	0.312858	0.327735	0.00138144	0.709906	UP	AT3G29000	--	Calcium-binding EF-hand family protein
BnaA03G0360400ZS	1.0876	1.05216	0.527947	0.507127	0.00138154	1.04772	UP	AT3G19950	BTL08	RING/U-box superfamily protein
BnaA08G0154900ZS	1.0032	1.0152	0.638944	0.61306	0.00138295	0.688974	UP	AT4G30530	GGP1	Encodes a gamma-glutamyl peptidase, outside the GGT family, that can hydrolyze gamma-glutamyl peptide bonds.
BnaC04G0567100ZS	0.920403	0.925314	0.399665	0.359342	0.0013943	1.282	UP	AT2G39400	MAGL6	alpha/beta-Hydrolases superfamily protein
BnaA02G0196900ZS	0.702212	0.720194	0.466393	0.469201	0.00139474	0.60438	UP	AT1G72020	--	--
BnaA04G0202200ZS	0.69309	0.687126	0.379143	0.355759	0.00139561	0.909269	UP	AT2G31090	TAX1	--
BnaA09G0488100ZS	0.215374	0.222282	0.124475	0.122744	0.00139569	0.824004	UP	--	--	--
Bnascaffold0025G0033100ZS	0.650409	0.632338	0.394443	0.389839	0.0013967	0.709793	UP	AT3G09720	RH57	P-loop containing nucleoside triphosphate hydrolases superfamily protein
BnaA02G0176700ZS	0.832695	0.830993	0.364101	0.327735	0.00140033	1.26588	UP	--	--	--
BnaA10G0089900ZS	1.14351	1.17117	0.739126	0.752767	0.00140255	0.633668	UP	AT5G52020	--	encodes a member of the DREB subfamily A-4 of ERF/AP2 transcription factor family. The protein contains one AP2 domain. There are 17 members in this subfamily including TINY.
Bnascaffold0025G0041600ZS	1.23885	1.22198	0.768831	0.797923	0.00141174	0.651368	UP	AT4G21620	--	glycine-rich protein
BnaC03G0045600ZS	0.729712	0.718454	0.44551	0.426886	0.00142556	0.731172	UP	AT5G10010	HIT4	--
BnaA01G0171200ZS	0.825326	0.808864	0.435628	0.41049	0.00145073	0.949644	UP	AT4G27670	HSP21	Encodes Hsp21, a chloroplast located small heat shock protein. A structure model of Hsp21, obtained by homology modeling, single-particle electron microscopy, and lysine-specific chemical crosslinking, shows that the Hsp21 subunits are arranged in two hexameric discs, rotated by 25 degree in relation to each other.
BnaC05G0542600ZS	0.596711	0.629878	0.168905	0.160443	0.00145224	1.89697	UP	AT3G04870	ZDS	Involved in the biosynthesis of carotenes and xanthophylls, reduces zeta-carotene to lycopene.
BnaC04G0346200ZS	1.05081	1.02428	0.668131	0.657242	0.00145948	0.646773	UP	AT3G52400	SYP122	syntaxin protein, involved in the negative regulation of defense pathways such as programmed cell death, salicylic acid signalling pathway, jasmonic acid signalling pathway
BnaA07G0201300ZS	0.516704	0.507542	0.280652	0.295339	0.00148794	0.830447	UP	AT3G57930	--	--
BnaC01G0217800ZS	0.427119	0.448472	0.148349	0.154643	0.00150808	1.53098	UP	AT4G27630	GTG2	Encodes a GPCR-type G protein receptor with nine predicted transmembrane domains. The protein binds abscisic acid (ABA) and is predicted to function as an ABA receptor. It has GTP-binding and GTPase activity and binds to ABA more effectively in the presence of GDP. GTG2 binds to GPA1, the alpha subunit of the heterotrimeric G protein. GPA1 (in its GTP-bound state) affects the GTP binding and GTPa…
BnaC02G0297700ZS	0.67032	0.658002	0.42592	0.411321	0.00150954	0.665889	UP	AT1G76360	PBL31	Protein kinase superfamily protein
BnaA05G0129700ZS	0.951652	0.984881	0.527947	0.535301	0.00151534	0.864997	UP	AT2G30990	--	Protein of unknown function (DUF688)
BnaA03G0019200ZS	0.550956	0.56022	0.282109	0.30052	0.00151707	0.931438	UP	AT5G05190	EDR4	Protein of unknown function (DUF3133)
Bnascaffold0636G0000100ZS	1.23666	1.22884	0.766574	0.80074	0.00151936	0.653587	UP	AT4G21620	--	glycine-rich protein
BnaC07G0062500ZS	0.785003	0.79845	0.514234	0.49637	0.00152002	0.647856	UP	AT1G45616	RLP6	receptor like protein 6
BnaC03G0402600ZS	0.713739	0.744618	0.321359	0.328088	0.00152292	1.16706	UP	AT3G13800	--	Metallo-hydrolase/oxidoreductase superfamily protein
BnaC06G0438300ZS	0.777127	0.801447	0.420307	0.434932	0.00153565	0.884221	UP	AT1G78120	TPR12	Encodes one of the 36 carboxylate clamp (CC)-tetratricopeptide repeat (TPR) proteins (Prasad 2010, Pubmed ID: 20856808) with potential to interact with Hsp90/Hsp70 as co-chaperones.
BnaA05G0162700ZS	0.783555	0.801501	0.35169	0.320548	0.00154687	1.23749	UP	AT1G53210	NCL	Encodes a Na+/Ca 2+ exchanger-like protein that participates in the maintenance of Ca 2+ homeostasis.
BnaC03G0552700ZS	0.498105	0.51207	0.303127	0.310174	0.00154975	0.719936	UP	AT5G62520	SRO5	Encodes a protein with similarity to RCD1 but without the WWE domain. The protein does have a PARP signature upstream of the C-terminal protein interaction domain. The PARP signature may bind NAD+ and attach the ADP-ribose-moiety from NAD+ to the target molecule. Its presence suggests a role for the protein in ADP ribosylation. Up-regulated by NaCl. SRO5 and P5CDH (an overlapping gene in the anti…
BnaC07G0527500ZS	0.592251	0.62365	0.182051	0.168111	0.00157091	1.79593	UP	AT4G35600	PBL30	Encodes a receptor-like cytoplasmic kinase that acts as a spatial inhibitor of cell separation. Analysis of the cDNA previously described in Meiners et al., 1991 revealed mistakes in the predicted open reading frame.
BnaC07G0548900ZS	0.723849	0.703332	0.401346	0.386401	0.00157207	0.857365	UP	AT4G38540	--	FAD/NAD(P)-binding oxidoreductase family protein
BnaC03G0621500ZS	0.706064	0.686141	0.381295	0.395509	0.0015778	0.841749	UP	AT3G47700	MAG2	Involved in transportation of seed storage proteins from the ER to the vacuole. Mutant seed cell accumulates the precursors of 12S globulin and 2S albumin instead of the vacuolar-located mature proteins.
BnaA01G0285400ZS	0.85913	0.866506	0.536895	0.560792	0.00158236	0.652661	UP	AT3G23940	DHAD	dehydratase family
BnaC04G0013100ZS	1.06218	1.04589	0.527947	0.487364	0.0015977	1.054	UP	AT2G46650	CYTB5-C	member of Cytochromes b5
BnaA10G0295000ZS	0.79628	0.797418	0.297435	0.335875	0.00159962	1.33139	UP	AT5G02740	--	Ribosomal protein S24e family protein
BnaC09G0238600ZS	1.12696	1.12118	0.386303	0.443008	0.00160996	1.43875	UP	AT5G46230	SVB3	Protein of unknown function, DUF538
BnaA01G0036300ZS	0.510394	0.512128	0.302624	0.318665	0.0016131	0.718797	UP	AT4G34650	SQS2	Encodes a protein with similarity to squalene synthase which catalyzes the first committed step in sterol biosynthesis. To date no experimental evidence exists that SQS2 functions as a squalene synthase and some experiments indicate it does not have this function.
BnaC02G0437800ZS	0.872943	0.871389	0.568172	0.591767	0.00163335	0.588626	UP	AT2G02790	IQD29	IQ-domain 29
BnaC06G0048800ZS	0.46422	0.449185	0.263974	0.267651	0.00163955	0.780849	UP	AT1G50510	PUMY	indigoidine synthase A family protein
BnaA09G0624500ZS	0.882018	0.923326	0.39596	0.394432	0.00165454	1.19163	UP	AT1G15910	IDP1	Belongs to a subgroup of SGS3-like proteins that act redundantly in RNA-directed DNA methylation: AT1G15910 (FDM1), AT4G00380 (FDM2), AT3G12550 (FDM3), AT1G13790 (FDM4), AT1G80790 (FDM5).
BnaC05G0316000ZS	0.716126	0.736122	0.479712	0.481211	0.00166159	0.595795	UP	AT1G47603	PUP19	Member of a family of proteins related to PUP1, a purine transporter. May be involved in the transport of purine and purine derivatives such as cytokinins, across the plasma membrane.
BnaC07G0023000ZS	0.775056	0.758773	0.334614	0.30178	0.00166363	1.26914	UP	AT2G19690	PLA2-BETA	Encodes one of the four Arabidopsis phospholipase PLA2 parologs: AT2G06925 (PLA2-ALPHA), AT2G19690 (PLA2-BETA), AT4G29460 (PLA2-GAMMA) and AT4G29470 (PLA2-DELTA). Involved in pollen development and germination and tube growth. Also involved in stomatal opening in response to light.
BnaC03G0678200ZS	0.747971	0.726663	0.420074	0.404084	0.00167307	0.839365	UP	AT4G39675	--	--
BnaA03G0562300ZS	0.688999	0.686437	0.451876	0.431894	0.00167457	0.638147	UP	AT2G23130	ATAGP17	AGP17 is a lysine-rich arabinogalactan-protein (AGP) and part of a multi-gene family of glycoproteins with approx. 50 members. It falls into one subclass with AGP18 and AGP19, other lysine-rich AGPs. 84% of its proline residues are hydroxylated to hydroproline and its heavy glycosylation accounts for appr. 69% of the molecular weight. The main glycosyl residues are arabinose (30.1%) and galactose…
BnaC07G0400100ZS	0.695831	0.703922	0.363697	0.336119	0.00168172	1.00012	UP	AT4G15260	--	UDP-Glycosyltransferase superfamily protein
BnaA04G0034000ZS	0.789558	0.801302	0.515006	0.533964	0.00168927	0.600833	UP	AT2G27030	CAM5	encodes a calmodulin that has higher affinity to kinesin-like calmodulin binding motor protein than CAM4 or CAM6.
BnaC03G0052600ZS	0.687113	0.704972	0.425607	0.411305	0.00169407	0.7341	UP	AT5G11720	AGLU1	Glycosyl hydrolases family 31 protein
BnaC02G0123600ZS	1.55725	1.53888	0.844715	0.787207	0.0016957	0.923891	UP	AT5G59820	ZAT12	Encodes a zinc finger protein involved in high light and cold acclimation. Overexpression of this putative transcription factor increases the expression level of 9 cold-responsive genes and represses the expression level of 15 cold-responsive genes, including CBF genes. Also, lines overexpressing this gene exhibits a small but reproducible increase in freeze tolerance. Because of the repression o…
BnaA08G0166200ZS	0.515895	0.500365	0.318289	0.315486	0.00169802	0.681227	UP	AT4G27657	--	--
BnaC07G0167300ZS	0.414248	0.395711	0.107744	0.122856	0.00169976	1.81246	UP	AT1G27030	--	--
BnaC08G0168700ZS	0.724652	0.75492	0.373136	0.368684	0.00171526	0.99604	UP	AT1G64280	SAI1	This gene is a key regulator of the salicylic acid (SA)-mediated systemic acquired resistance (SAR) pathway. It is similar to the transcription factor inhibitor I kappa B, and contains ankyrin repeats. It confers resistance to the pathogens Pseudomonas syringae and Peronospora parasitica in a dosage-dependent fashion. Although transgenic Arabidopsis plants overexpressing NPR1 acquire enhanced sen…
BnaC08G0496500ZS	1.14686	1.13317	0.703929	0.736039	0.00172207	0.663019	UP	AT1G13750	PAP1	Purple acid phosphatases superfamily protein
BnaC04G0582400ZS	0.95454	0.958729	0.610343	0.580517	0.00173374	0.684035	UP	AT2G41480	PRX25	Encodes a cationic cell-wall-bound peroxidase homolog that is involved in the lignification of cell walls.
BnaC09G0296100ZS	0.223918	0.237427	0.0703929	0.0698219	0.001768	1.71821	UP	AT4G11220	RTNLB2	VIRB2-interacting protein 2
BnaA04G0077500ZS	0.632616	0.656125	0.320778	0.305254	0.00180222	1.04165	UP	AT4G13350	NIG	--
BnaA03G0047600ZS	1.29475	1.25491	0.768846	0.783663	0.00181208	0.715698	UP	AT5G12020	HSP17.6II	17.6 kDa class II heat shock protein
BnaC02G0094200ZS	0.491282	0.471085	0.227665	0.218669	0.00183078	1.10846	UP	AT5G12170	CLT3	Encodes one of the CRT-Like transporters (CLT1/AT5G19380, CLT2/AT4G24460, CLT3/AT5G12170). Required for glutathione homeostasis and stress responses. Mutants lacking these transporters are heavy metal-sensitive, glutathione(GSH)-deficient, and hypersensitive to Phytophthora infection.
BnaA09G0247900ZS	0.863208	0.866756	0.562171	0.535301	0.0018312	0.656558	UP	AT4G11600	PHGPX	Encodes glutathione peroxidase.
BnaC04G0221300ZS	0.666156	0.692494	0.263974	0.286499	0.00183389	1.30343	UP	AT1G56350	--	Peptide chain release factor 2
BnaA05G0086700ZS	0.763169	0.739773	0.434483	0.419319	0.00183957	0.815816	UP	AT2G36310	URH1	Encodes a cytoplasmic nucleoside hydrolase. It has the highest levels of activity with uridine followed by xanthosine. It shows little activity with inosine and none with cytidine. Mutant analyses indicate that it plays a role in purine and pyrimidine catabolism.
BnaA08G0059400ZS	0.578579	0.56292	0.30391	0.319995	0.00187575	0.871529	UP	AT1G42480	--	--
BnaA03G0409700ZS	0.657093	0.673079	0.432743	0.444186	0.00187604	0.601079	UP	AT5G61450	--	P-loop containing nucleoside triphosphate hydrolases superfamily protein
BnaC04G0473100ZS	0.78194	0.787367	0.528687	0.506036	0.001893	0.600882	UP	AT2G27030	CAM5	encodes a calmodulin that has higher affinity to kinesin-like calmodulin binding motor protein than CAM4 or CAM6.
BnaA09G0458500ZS	0.507904	0.506703	0.206825	0.1792	0.0019295	1.39416	UP	AT1G22800	--	S-adenosyl-L-methionine-dependent methyltransferases superfamily protein
BnaC06G0268300ZS	0.613613	0.593567	0.353288	0.342851	0.0019501	0.794192	UP	AT1G76010	Atalba1	Alba DNA/RNA-binding protein
BnaC05G0116400ZS	0.604099	0.574109	0.240856	0.231603	0.00197181	1.31834	UP	AT1G14480	--	Ankyrin repeat family protein
BnaA04G0118800ZS	0.498612	0.51822	0.288374	0.287331	0.00197553	0.820679	UP	AT5G40540	--	Protein kinase superfamily protein
BnaC04G0042000ZS	0.812646	0.841706	0.494653	0.487395	0.00197896	0.752401	UP	AT2G43465	--	RNA-binding ASCH domain protein
BnaA08G0139200ZS	0.838059	0.829059	0.499634	0.469875	0.00198029	0.782029	UP	AT4G33910	--	2-oxoglutarate (2OG) and Fe(II)-dependent oxygenase superfamily protein
BnaC05G0269900ZS	0.611776	0.61555	0.389014	0.368379	0.00198659	0.696405	UP	AT1G30880	--	--
BnaA08G0049400ZS	0.721943	0.753239	0.387161	0.387632	0.00199124	0.92901	UP	AT1G45130	BGAL5	beta-galactosidase 5
BnaA02G0358800ZS	0.707577	0.682968	0.413302	0.40636	0.00200008	0.76255	UP	AT5G47910	RBOHD	NADPH/respiratory burst oxidase protein D (RbohD).Interacts with AtrbohF gene to fine tune the spatial control of ROI production and hypersensitive response to cell in and around infection site.
BnaC06G0243600ZS	0.831001	0.833708	0.477117	0.443882	0.00200425	0.853998	UP	AT1G80380	GLYK	encodes a glycerate kinase which catalyzes the last step of photorespiration C2 cycle.
BnaC03G0374000ZS	0.598792	0.5682	0.237037	0.229928	0.00200682	1.32141	UP	--	--	--
BnaA07G0269000ZS	0.754176	0.777863	0.500873	0.50231	0.00200736	0.610868	UP	AT1G70000	MYBD	myb-like transcription factor family protein
BnaC01G0277000ZS	0.684086	0.666846	0.356466	0.378333	0.0020363	0.878534	UP	AT3G49410	--	Transcription factor IIIC, subunit 5
BnaC05G0509500ZS	0.49846	0.496444	0.322656	0.337871	0.00210022	0.590941	UP	AT3G08720	S6K2	Encodes a ribosomal-protein S6 kinase. Gene expression is induced by cold and salt (NaCl). Activation of AtS6k is regulated by 1-naphthylacetic acid and kinetin, at least in part, via a lipid kinase-dependent pathway. Phosphorylates specifically mammalian and plant S6 at 25 degrees C but not at 37 degrees C. Involved in translational up-regulation of ribosomal proteins.
BnaA09G0090700ZS	0.47381	0.458865	0.251146	0.237245	0.00210377	0.933335	UP	AT5G65207	--	--
BnaC04G0226900ZS	0.475826	0.485961	0.211179	0.187355	0.00210608	1.27101	UP	AT1G59750	ARF1	Encodes a member of the auxin response factor family. ARFs bind to the cis element 5'-TGTCTC-3' ARFs mediate changes in gene expression in response to auxin. ARF's form heterodimers with IAA/AUX genes. ARF1 enhances mutant phenotypes of ARF2 and may act with ARF2 to control aspects of maturation and senescence.ARF1:LUC and 3xHA:ARF1 proteins have a half-life of ~3-4 hours and their degradation is…
BnaC07G0312500ZS	0.749771	0.72837	0.459391	0.443785	0.00211538	0.710704	UP	AT3G28180	CSLC4	encodes a gene similar to cellulose synthase
BnaA03G0439800ZS	0.724083	0.740747	0.465836	0.482821	0.00211833	0.626776	UP	AT4G17270	--	Mo25 family protein
BnaC04G0349400ZS	0.637302	0.658151	0.406221	0.413317	0.0021347	0.660574	UP	AT3G51920	CML9	encodes a divergent member of calmodulin, which is an EF-hand family of Ca2+-binding proteins. This gene is expressed in leaves, flowers and siliques. The gene functionally complements yeast calmodulin 1 (CAM1) but only when selected against the plasmid harboring wild-type yeast sequences. Also the protein does not form formed a complex with a basic amphiphilic helical peptide in the presence of …
BnaA09G0687900ZS	1.17824	1.11569	0.436922	0.41177	0.00216898	1.4345	UP	AT1G03270	--	CBS domain-containing protein with a domain of unknown function (DUF21)
BnaA06G0300100ZS	0.617739	0.600162	0.389014	0.377407	0.00216956	0.668189	UP	AT5G65040	IRM1	Protein of unknown function (DUF581)
BnaC02G0185300ZS	0.720347	0.750582	0.36135	0.377392	0.00217809	0.993584	UP	AT5G52450	--	MATE efflux family protein
BnaC03G0772700ZS	0.784299	0.811999	0.499314	0.50233	0.00218826	0.672361	UP	AT4G30530	GGP1	Encodes a gamma-glutamyl peptidase, outside the GGT family, that can hydrolyze gamma-glutamyl peptide bonds.
BnaC02G0178800ZS	0.81603	0.794961	0.524112	0.5388	0.00218868	0.599926	UP	AT5G53130	CNGC1	member of Cyclic nucleotide gated channel family
BnaC09G0356200ZS	0.456483	0.432444	0.188553	0.187355	0.00219397	1.24169	UP	AT5G53450	ORG1	OBP3-responsive gene 1
BnaC01G0307200ZS	2.37913	2.53915	0.383961	0.486637	0.00219905	2.49807	UP
BnaA02G0165500ZS	0.619968	0.646033	0.341929	0.33219	0.00220267	0.909203	UP	AT1G67310	--	Calmodulin-binding transcription activator protein with CG-1 and Ankyrin domains
BnaA10G0008800ZS	0.580275	0.562024	0.345565	0.35549	0.00220937	0.704342	UP	AT1G01040	SUS1	Encodes a Dicer homolog. Dicer is a RNA helicase involved in microRNA processing. Mutations in this locus can result in embryo lethality. Embryo shape at seed maturity is globular-elongate. Other mutants convert the floral meristems to an indeterminate state, others yet show defects in ovule development. mRNA is expressed in all shoot tissues. DCL1 is able to produce miRNAs and siRNAs.
BnaA06G0066200ZS	0.426423	0.439093	0.239681	0.225695	0.00221701	0.895163	UP	AT1G10410	--	Protein of unknown function (DUF1336)
BnaA09G0197500ZS	0.772803	0.756208	0.473407	0.494278	0.00224888	0.659989	UP	AT5G44730	--	Haloacid dehalogenase-like hydrolase (HAD) superfamily protein
BnaC09G0114800ZS	0.62491	0.598709	0.270512	0.288448	0.00227437	1.13034	UP	AT2G17500	PILS5	Auxin efflux carrier family protein
BnaA04G0169000ZS	1.33391	1.37275	0.907009	0.886351	0.00231232	0.593849	UP	AT2G25490	FBL6	Encodes an F-box protein involved in the ubiquitin/proteasome-dependent proteolysis of EIN3.
BnaC09G0122700ZS	0.904462	0.84946	0.296391	0.282801	0.00231801	1.59847	UP	AT2G18630	--	Protein of unknown function (DUF677)
BnaA03G0389500ZS	0.663859	0.700338	0.270999	0.25328	0.00232331	1.37964	UP	AT2G06050	OPR3	Encodes a 12-oxophytodienoate reductase that is required for jasmonate biosynthesis. Mutants are male sterile and defective in pollen dehiscence. Shows activity towards 2,4,6-trinitrotoluene.
BnaC03G0315400ZS	0.650295	0.671022	0.398583	0.412282	0.00236052	0.704444	UP	AT4G04950	GRXS17	Encodes a monothiol glutaredoxin that is a critical component involved in ROS accumulation, auxin signaling, and temperature-dependent postembryonic growth in plants.
BnaC03G0527300ZS	1.50094	1.54775	1.02214	1.00509	0.00236975	0.588684	UP	AT5G64905	PROPEP3	elicitor peptide 3 precursor
BnaC05G0052300ZS	1.35346	1.36652	0.795537	0.739225	0.00237033	0.825582	UP	AT1G07260	UGT71C3	UDP-glucosyl transferase 71C3
BnaC05G0377000ZS	0.569275	0.538157	0.195926	0.178022	0.0023871	1.56631	UP	AT3G21070	NADK1	Encodes a protein with NAD(H) kinase activity.
BnaC04G0586900ZS	0.50293	0.487134	0.321359	0.314129	0.00239177	0.639657	UP	AT2G42280	FBH4	basic helix-loop-helix (bHLH) DNA-binding superfamily protein
BnaA08G0291700ZS	0.822415	0.841512	0.504048	0.528482	0.00240365	0.688408	UP	AT1G09920	--	TRAF-type zinc finger-related
BnaA07G0116900ZS	0.86396	0.841357	0.556783	0.536491	0.00245404	0.641384	UP	AT1G70490	ATARFA1D	A member of ARF GTPase family. A thaliana has 21 members of this family, known to be essential for vesicle coating and uncoating and functions in GTP-binding. Gene encoding ADP-ribosylation factor and similar to other ARFs and ARF-like proteins. The gene is shown to play a role in cell division, cell expansion and cellulose production using antisense construct.
BnaC03G0559300ZS	0.336738	0.35614	0.124223	0.133825	0.00246935	1.42496	UP	AT3G53900	UPP	Encodes UPP, a plastidial uracil phosphoribosyltransferase (UPRT) involved in uracil salvage. Loss-of-function mutation causes dramatic growth retardation, a pale-green to albino phenotype, abnormal root morphology and chloroplastic disorders.
BnaC07G0214100ZS	0.13595	0.131904	0.0681222	0.0729956	0.00248878	0.924546	UP	AT5G66550	--	Maf-like protein
BnaA06G0130600ZS	0.570991	0.571583	0.131987	0.0856482	0.00250092	2.3923	UP	AT1G30240	--	--
BnaC04G0370000ZS	1.08342	1.05068	0.574727	0.609332	0.00250476	0.849886	UP	AT5G35730	--	EXS (ERD1/XPR1/SYG1) family protein
BnaC06G0404300ZS	1.27541	1.25675	0.736347	0.783557	0.00250548	0.736387	UP	AT1G74090	SOT18	encodes a desulfoglucosinolate sulfotransferase, involved in the final step of glucosinolate core structure biosynthesis. Has a broad-substrate specificity with preference with methionine-derived desulfoglucosinolates.
BnaA09G0248000ZS	1.33231	1.26957	0.675772	0.669126	0.00250973	0.95206	UP	AT4G11610	MCTP7	C2 calcium/lipid-binding plant phosphoribosyltransferase family protein
BnaA06G0101700ZS	0.622686	0.654022	0.298135	0.28252	0.00252056	1.13668	UP	AT1G15220	CCMH	Encodes a protein with oxidoreductase activity present in the inner membrane of mitochondria. CCMH is postulated to play a central role in mitochondrial cytochrome c maturation, probably as part of a heme lyase complex that also holds activity of reducing apocytochrome c. CCMH interacts with apocytochrome AtCYTc-a and is shown to be present in a 500 kDa-complex along with CcmFN2.
BnaA03G0286700ZS	0.573965	0.563963	0.37017	0.386606	0.0025385	0.588471	UP	AT3G02180	SP1L3	SPIRAL1-LIKE3 belongs to a six-member gene family in Arabidopsis; all members share high sequence similarity in amino- and carboxy-terminal regions. Regulates cortical microtubule organization. Mutant plants exhibit altered patterns of root, leaf and petal growth as a result of defective anisotropic cell expansion.
BnaA05G0029500ZS	0.610298	0.631316	0.411799	0.412979	0.00254073	0.590141	UP	AT2G42210	OEP16-3	Homologous to pea OEP16 and barley pPORA (OEP16), a member of Arabidopsis OEP16 family.
BnaA07G0381500ZS	0.592914	0.596485	0.26591	0.297389	0.00255073	1.07826	UP	AT2G21820	--	--
BnaC03G0740600ZS	0.656063	0.658747	0.23907	0.279288	0.00255135	1.34283	UP	AT4G35110	PEARLI 4	Arabidopsis phospholipase-like protein (PEARLI 4) family
BnaA09G0134000ZS	0.68833	0.681708	0.28613	0.244137	0.00255282	1.36943	UP	AT2G20142	--	Toll-Interleukin-Resistance (TIR) domain family protein
BnaC02G0177400ZS	0.892173	0.913067	0.563144	0.588831	0.00255926	0.648081	UP	AT5G53310	--	myosin heavy chain-related
BnaC01G0200300ZS	1.08971	1.12469	0.645269	0.611301	0.00258089	0.817428	UP	AT5G56710	--	Ribosomal protein L31e family protein
BnaA04G0051400ZS	0.531923	0.517254	0.195168	0.223864	0.00260545	1.32412	UP	AT3G54020	AtIPCS1	Inositol phosphorylceramide synthase
BnaC06G0453200ZS	0.845392	0.875732	0.555362	0.545721	0.00262575	0.644427	UP	AT1G80840	WRKY40	Pathogen-induced transcription factor. Binds W-box sequences in vitro. Forms protein complexes with itself and with WRKY40 and WRKY60. Coexpression with WRKY18 or WRKY60 made plants more susceptible to both P. syringae and B. cinerea. WRKY18, WRKY40, and WRKY60 have partially redundant roles in response to the hemibiotrophic bacterial pathogen Pseudomonas syringae and the necrotrophic fungal path…
BnaC04G0042400ZS	0.908395	0.882471	0.400882	0.442126	0.00263098	1.08704	UP	AT2G43510	TI1	Member of the defensin-like (DEFL) family. Encodes putative trypsin inhibitor protein which may function in defense against herbivory.
BnaA03G0461100ZS	1.2492	1.21815	0.774829	0.808044	0.002632	0.640415	UP	AT4G21620	--	glycine-rich protein
BnaA07G0035500ZS	0.714656	0.725506	0.472334	0.447681	0.00267059	0.646502	UP	AT3G44840	--	S-adenosyl-L-methionine-dependent methyltransferases superfamily protein
BnaA03G0395300ZS	0.578561	0.60608	0.317345	0.308204	0.00267934	0.921256	UP	AT2G15580	--	RING/U-box superfamily protein
BnaA01G0095400ZS	0.810263	0.836311	0.548593	0.535301	0.00269006	0.603244	UP	AT4G18530	SGC	Protein of unknown function (DUF707)
BnaC07G0472000ZS	0.573217	0.589768	0.360103	0.374982	0.00269447	0.66185	UP	AT4G27040	VPS22	EAP30/Vps36 family protein
BnaA09G0630400ZS	0.556943	0.575094	0.370036	0.359461	0.00271223	0.633946	UP	AT1G14860	NUDT18	nudix hydrolase homolog 18
BnaA05G0118400ZS	0.723434	0.70118	0.425992	0.404333	0.00271945	0.778824	UP	AT2G32150	XMPP	Haloacid dehalogenase-like hydrolase (HAD) superfamily protein
BnaA07G0077000ZS	0.752808	0.753109	0.483384	0.453649	0.00272106	0.68447	UP	AT2G26230	UOX	uricase / urate oxidase / nodulin 35, putative
BnaC02G0360600ZS	0.347719	0.362735	0.1971	0.203279	0.0027311	0.827374	UP	AT1G67230	LINC1	Encodes a nuclear coiled-coil protein related to the carrot peripheral nuclear protein NMCP1 that is involved in the determination of plant nuclear structure.
BnaC03G0300800ZS	0.605848	0.622187	0.373204	0.352542	0.00273905	0.758816	UP	AT4G10050	PMES	esterase/lipase/thioesterase family protein
BnaC02G0439600ZS	0.901203	0.84938	0.36218	0.376279	0.00280385	1.24525	UP	AT2G03240	--	EXS (ERD1/XPR1/SYG1) family protein
BnaA09G0591400ZS	1.16211	1.11342	0.440649	0.380515	0.00281843	1.47046	UP	AT2G22540	SVP	Encodes a nuclear protein that acts as a floral repressor and that functions within the thermosensory pathway. SVP represses FT expression via direct binding to the vCArG III motif in the FT promoter.
BnaC06G0212200ZS	0.28752	0.292943	0.1535	0.166349	0.00285125	0.859815	UP	AT3G58170	MTV15	Encodes a Bet1/Sft1-like SNARE protein which fully suppresses the temperature-sensitive growth defect in <i>sft1-1</i> yeast cells; however, it cannot support the deletion of the yeast BET1 gene (<i>bet1&#916;</i>).
BnaA01G0284100ZS	0.798022	0.864569	0.191981	0.17155	0.00285924	2.19328	UP	AT1G61890	--	MATE efflux family protein
BnaA02G0014300ZS	1.58609	1.58284	0.671933	0.764716	0.00286	1.14129	UP
BnaA09G0050300ZS	0.605023	0.588106	0.365502	0.345987	0.00286308	0.745837	UP	AT5G48810	CYTB5-B	Encodes a cytochrome b5 isoform that localizes to the ER. The C-terminal portion of the protein appears to be capable of inserting into a plant microsomal membrane in vitro and the protein appears to be subject to glycosylation.
BnaA07G0389800ZS	0.808442	0.77011	0.413176	0.42378	0.00286378	0.915378	UP	AT1G80300	NTT1	Encodes an ATP/ADP transporter.
BnaC01G0408900ZS	0.87066	0.923326	0.126707	0.186192	0.00286512	2.5194	UP	AT3G17860	TIFY6B	JAZs are direct targets of the SCFCOI1 E3 ubiquitin-ligase and JA treatment induces their proteasome-mediated degradation. Furthermore, JAI3 negatively regulates the key transcriptional activator of JA responses, AtMYC2. The C-terminal portion of JAZ3, including the Jas domain, appears to be important for JAZ3-COI1 binding in the presence of coronatine.
BnaA10G0152100ZS	1.33231	1.32728	0.49495	0.57991	0.0028718	1.30706	UP	AT5G59700	ANJ	Protein kinase superfamily protein
BnaA02G0292400ZS	0.701831	0.729814	0.445498	0.435754	0.00288579	0.700047	UP	AT5G45280	PAE11	Pectinacetylesterase family protein
BnaA09G0499000ZS	1.16599	1.17821	0.668733	0.718802	0.00288985	0.756571	UP	AT3G53780	RBL4	RHOMBOID-like protein 4
BnaC09G0605200ZS	0.499726	0.511163	0.336794	0.321621	0.00289324	0.618555	UP	AT5G04080	AthCYSTM12	--
BnaC05G0160900ZS	0.917596	0.881356	0.515022	0.533442	0.00292139	0.77888	UP	AT1G19190	NPF5.1	alpha/beta-Hydrolases superfamily protein
BnaA03G0172300ZS	0.543801	0.573581	0.281572	0.284735	0.00294027	0.980468	UP	AT2G35910	ATL70	RING/U-box superfamily protein
BnaC02G0266500ZS	0.354037	0.36473	0.151828	0.170538	0.00294256	1.15682	UP	AT1G72450	TIFY11B	JAZ6 transcript levels rise in response to a jasmonate stimulus and a GFP:JAZ6 fusion protein localizes to the nucleus. Application of jasmonate methyl ester to Arabidopsis roots reduces the levels of a JAZ6:GUS fusion protein, presumably by stimulating ubiquitin-proteasome-mediated degradation.
BnaA04G0115600ZS	0.776347	0.781276	0.422358	0.45883	0.00294712	0.821826	UP	AT5G40250	ATL46	RING/U-box superfamily protein
BnaA03G0246700ZS	0.428672	0.410367	0.175982	0.15516	0.00296648	1.34129	UP	AT4G07990	DJC78	Chaperone DnaJ-domain superfamily protein
BnaC08G0458800ZS	0.64849	0.674579	0.40531	0.414427	0.00300114	0.690655	UP	AT2G20560	DNAJ	DNAJ heat shock family protein
BnaA03G0233600ZS	0.918134	0.875976	0.423462	0.451559	0.00302481	1.03588	UP	AT2G27500	--	Glycosyl hydrolase superfamily protein
BnaA01G0144800ZS	0.777312	0.811082	0.488034	0.48458	0.00302529	0.707631	UP	AT5G50460	SEC61gamma	secE/sec61-gamma protein transport protein
BnaA06G0438200ZS	0.783713	0.802892	0.496891	0.468388	0.00304332	0.716924	UP	AT5G44040	--	--
BnaA01G0037500ZS	0.7109	0.690367	0.400264	0.424702	0.00305346	0.764325	UP	AT4G34480	--	O-Glycosyl hydrolases family 17 protein
BnaA04G0110100ZS	1.00452	0.923326	0.175982	0.203924	0.00306311	2.34327	UP	AT5G39760	ZHD10	homeobox protein 23
BnaC07G0177400ZS	0.70592	0.701728	0.451788	0.422443	0.00307416	0.6872	UP	AT1G22840	CYTC-1	Encodes cytochrome c. Contains two site II (TGGGCC/T) elements, which interact with a TCP-domain transcription factor, and a downstream internal telomeric repeat, and are required for expression of the Cytc-1 gene. Promoter directs preferential expression in root and shoot meristems and in anthers.
BnaC05G0107300ZS	0.972799	0.947001	0.482039	0.432359	0.00308574	1.07006	UP	AT1G13590	PSK1	Encodes a phytosulfokine-alpha (PSK) precursor, a unique plant peptide growth factor first described in Asparagus.
BnaA07G0389600ZS	0.918354	0.883006	0.575467	0.58203	0.00310349	0.638078	UP	AT1G80240	DGR1	Protein of unknown function, DUF642
BnaA09G0571800ZS	0.571475	0.599352	0.312177	0.297881	0.00310664	0.940509	UP	AT2G26300	GPA1	Encodes an alpha subunit of a heterotrimeric GTP-binding protein. The active GTP-bound form of GPA1 binds to the GTG1 and GTG2 abscisic acid (ABA) receptors and appears to affect their GTPase and GTP-binding activity, and hence, ABA binding abilities. GPA1 is a positive regulator in ABA-mediated inhibition of stomatal opening. Plants with recessive mutant alleles have complex phenotypes including…
BnaA08G0283000ZS	0.711143	0.695427	0.30297	0.258421	0.00310944	1.3251	UP	AT1G11670	--	MATE efflux family protein
BnaA09G0206700ZS	1.83986	1.84665	0.140786	0.321181	0.00311954	2.9964	UP	AT5G46230	SVB3	Protein of unknown function, DUF538
BnaA05G0343600ZS	0.543436	0.563003	0.314813	0.331587	0.00312387	0.775427	UP	AT3G21352	--	--
BnaC04G0427300ZS	0.522396	0.487311	0.176408	0.185667	0.00312458	1.47957	UP	AT2G21120	ENOR3	Protein of unknown function (DUF803)
BnaC06G0049400ZS	1.37867	1.33103	0.671933	0.607361	0.00313258	1.08279	UP	AT1G50630	--	Protein of unknown function (DUF3537)
BnaA05G0115200ZS	0.420576	0.411363	0.17966	0.20318	0.00314875	1.11974	UP	AT2G32210	AthCYSTM6	--
BnaC03G0386400ZS	1.06771	1.0054	0.351965	0.301107	0.00319256	1.66648	UP	AT3G11170	FADD	Chloroplastic enzyme responsible for the synthesis of 16:3 and 18:3 fatty acids from galactolipids, sulpholipids and phosphatidylglycerol. Uses ferredoxin as electron donor. Gene expression is induced by wounding in shoot and root. The wound-response in shoot is independent of jasmonic acid mediated pathway whereas the root response is mediated by jasmonic acid.
Bnascaffold0025G0001300ZS	0.940571	0.946139	0.562453	0.603007	0.00320559	0.694973	UP	AT1G80240	DGR1	Protein of unknown function, DUF642
BnaA07G0015500ZS	0.689127	0.659518	0.390222	0.401476	0.00321893	0.76849	UP	AT2G18915	LKP2	encodes a member of F-box proteins that includes two other proteins in Arabidopsis (ZTL and FKF1). These proteins contain a unique structure containing a PAS domain at their N-terminus, an F-box motif, and 6 kelch repeats at their C-terminus. Overexpression results in arrhythmic phenotypes for a number of circadian clock outputs in both constant light and constant darkness, long hypocotyls under …
BnaC05G0372300ZS	1.26887	1.2311	0.502807	0.574469	0.0032263	1.21452	UP	AT3G21230	4CL5	The gene encodes a 4-coumarate coenzyme A ligase being able to use sinapate as substrate. The catalytic efficiency was in the following (descending) order: p-coumaric acid, caffeic acid, 5-OH-ferulic acid, ferulic acid and sinapic acid. At4CL5 was unable to use cinnamic acid as substrate. Knockout of At4CL5 (4cl5) revealed no effect on syringyl lignin content indicating that the activity observed…
BnaA10G0105500ZS	0.560663	0.546609	0.374919	0.358967	0.00322634	0.593382	UP	AT5G54260	MRE11	DNA repair and meiotic recombination protein, component of MRE11 complex with RAD50 and NBS1
BnaC09G0070200ZS	0.360474	0.3788	0.185495	0.194655	0.00323887	0.959542	UP	AT4G13430	IIL1	Encodes a methylthioalkylmalate isomerase involved in glucosinolate biosynthesis.
BnaA07G0008800ZS	0.761321	0.79328	0.492751	0.484801	0.00324121	0.6693	UP	AT2G19790	AP4S	SNARE-like superfamily protein
BnaA02G0027500ZS	0.940564	0.899186	0.547203	0.555647	0.00326815	0.738273	UP	AT5G07960	--	--
BnaC07G0522500ZS	0.618573	0.64303	0.418373	0.416345	0.00328859	0.595898	UP	AT4G34680	GATA3	Encodes a member of the GATA factor family of zinc finger transcription factors.
BnaC05G0058400ZS	0.738595	0.697624	0.351965	0.339459	0.00329172	1.05463	UP	AT1G62350	--	Pentatricopeptide repeat (PPR) superfamily protein
BnaA03G0234000ZS	0.760951	0.767371	0.437161	0.472293	0.00331376	0.748875	UP	AT2G27389	--	--
BnaA04G0051600ZS	0.606758	0.580376	0.363094	0.356867	0.00334967	0.721491	UP	AT3G54000	--	--
BnaC05G0126000ZS	0.853661	0.879521	0.528056	0.495794	0.00338058	0.759418	UP	AT1G15210	PDR7	pleiotropic drug resistance 7
BnaC08G0142300ZS	0.805244	0.793483	0.496143	0.527543	0.00338274	0.64315	UP	AT4G16400	--	--
BnaC04G0516500ZS	0.994908	1.04644	0.555734	0.535301	0.00338502	0.903822	UP	AT2G31985	--	Protein of unknown function (DUF1264)
BnaA07G0330200ZS	0.721943	0.699048	0.412518	0.436855	0.00339949	0.742427	UP	AT1G72020	--	--
BnaC01G0126000ZS	0.772095	0.729867	0.391072	0.38931	0.00341313	0.944596	UP	AT4G19460	--	UDP-Glycosyltransferase superfamily protein
BnaC06G0299300ZS	1.12526	1.07351	0.39596	0.455575	0.00341644	1.36856	UP	AT1G70700	TIFY7	JAZ9 is a protein presumed to be involved in jasmonate signaling. JAZ9 transcript levels rise in response to a jasmonate stimulus. JAZ9 can interact with the COI1 F-box subunit of an SCF E3 ubiquitin ligase in a yeast-two-hybrid assay only in the presence of jasmonate-isoleucine (JA-ILE) or coronatine. The Jas domain appears to be important for JAZ9-COI1 interactions in the presence of coronatine…
BnaC05G0142600ZS	0.737905	0.700988	0.400965	0.392123	0.00343744	0.859407	UP	AT1G78570	ROL1	Encodes a UDP-L-Rhamnose synthase involved in the biosynthesis of rhamnose, a major monosaccharide component of pectin. Catalyzes the conversion of UDP-D-Glc to UDP-L-Rha. The dehydrogenase domain of RHM1 was shown to catalyze the conversion of UDP-D-Glc to the reaction intermediate UDP-4-keto-6-deoxy-D-Glc using recombinant protein assay but the activity of the full-length protein was not determ…
BnaC07G0518100ZS	0.419768	0.447964	0.194706	0.192811	0.00344516	1.16299	UP	AT4G34150	--	Calcium-dependent lipid-binding (CaLB domain) family protein
BnaC03G0022500ZS	0.524379	0.500135	0.277867	0.289589	0.00345357	0.85236	UP	AT5G04980	--	DNAse I-like superfamily protein
BnaC02G0049800ZS	0.795375	0.782111	0.478356	0.441908	0.00346476	0.777508	UP	AT5G12020	HSP17.6II	17.6 kDa class II heat shock protein
BnaA09G0526400ZS	0.639635	0.673449	0.368567	0.361769	0.00348471	0.846326	UP	AT3G57120	--	Protein kinase superfamily protein
BnaC05G0542100ZS	1.01305	1.05019	0.575942	0.612508	0.00353151	0.795832	UP	AT3G04940	CYSD1	Encodes cysteine synthase CysD1.
BnaC05G0083800ZS	0.60848	0.635643	0.375429	0.385109	0.00353675	0.710037	UP	AT1G10500	SUFA1	Involved in chloroplast Fe-S cluster assembly. Located in the chloroplast stroma. Expressed preferentially in green tissues.
BnaC03G0075600ZS	1.00933	1.01884	0.287971	0.369173	0.00353717	1.6259	UP	AT5G15740	RRT1	O-fucosyltransferase family protein
BnaC02G0194400ZS	0.756996	0.79449	0.461954	0.45883	0.00353973	0.752716	UP	AT5G50840	--	--
BnaC09G0439700ZS	1.14014	1.08209	0.594616	0.56989	0.00354017	0.932291	UP	AT5G60460	--	Preprotein translocase Sec, Sec61-beta subunit protein
BnaC08G0452100ZS	0.703491	0.758838	0.260106	0.267884	0.00355915	1.46969	UP	AT2G21510	--	DNAJ heat shock N-terminal domain-containing protein
BnaC05G0020800ZS	0.351697	0.35152	0.184055	0.162732	0.00356015	1.01992	UP	AT1G03457	BRN2	RNA-binding (RRM/RBD/RNP motifs) family protein
BnaC05G0102000ZS	1.10439	1.06182	0.631466	0.661827	0.0035678	0.744124	UP	AT1G12430	PAK	Encodes the kinesin-like protein PAK has an Armadillo motif tail and is involved in guard cell development in Arabidopsis (from Genbank record AF159052).However, no defect in stomatal complexes has been observed in loss of function mutations. It accumulates at the preprophase band (PPB) in a cell-cycle and microtubule-dependent manner and is most highly expressed in cells where the placement of t…
BnaA09G0500200ZS	0.432115	0.405595	0.189236	0.180062	0.00356973	1.18166	UP	AT3G54000	--	--
BnaC06G0223700ZS	1.22355	1.21186	0.485141	0.392554	0.00356984	1.47238	UP	--	--	--
BnaC08G0260600ZS	0.870375	0.858664	0.4763	0.428241	0.00358003	0.934713	UP	AT1G20510	OPCL1	OPC-8:0 CoA ligase1
BnaA10G0017900ZS	0.674086	0.687583	0.433187	0.40474	0.00359478	0.70048	UP	AT1G03360	SOP2	ribosomal RNA processing 4
BnaC09G0619000ZS	1.28419	1.23771	0.706734	0.654615	0.00360146	0.889476	UP	AT5G02230	--	Haloacid dehalogenase-like hydrolase (HAD) superfamily protein
Bnascaffold0026G0020200ZS	0.970685	0.903253	0.33344	0.356867	0.00361758	1.44076	UP	AT5G19430	C3HC4	RING/U-box superfamily protein
BnaC08G0485900ZS	0.961996	0.964823	0.568558	0.613414	0.00362121	0.705025	UP	AT1G15170	--	MATE efflux family protein
BnaC05G0523400ZS	0.495259	0.518182	0.301542	0.290429	0.00363338	0.775662	UP	AT3G06680	--	Ribosomal L29e protein family
BnaC03G0646500ZS	0.86726	0.856506	0.370014	0.425146	0.00363896	1.11625	UP	AT1G27770	PEA1	Encodes a chloroplast envelope Ca2+-ATPase with an N-terminal autoinhibitor.
BnaC02G0396600ZS	0.475034	0.49879	0.287014	0.280747	0.00364071	0.778379	UP	AT5G45020	--	Glutathione S-transferase family protein
BnaA01G0027600ZS	0.758095	0.71228	0.351965	0.356867	0.00364085	1.05267	UP	AT4G35770	SEN1	Senescence-associated gene that is strongly induced by phosphate starvation. Transcripts are differentially regulated at the level of mRNA stability at different times of day. mRNAs are targets of the mRNA degradation pathway mediated by the downstream (DST) instability determinant.
BnaA05G0454200ZS	0.594782	0.61555	0.407794	0.394432	0.00364161	0.593323	UP	AT3G07880	SCN1	Immunoglobulin E-set superfamily protein
BnaC05G0250900ZS	1.7747	1.68445	0.979696	0.961727	0.00365644	0.833302	UP	AT2G34160	IRP7	Alba DNA/RNA-binding protein
BnaC01G0404700ZS	0.619713	0.638366	0.395405	0.372237	0.00365794	0.712718	UP	AT3G18410	--	Complex I subunit NDUFS6
BnaC02G0285600ZS	0.402622	0.384719	0.185245	0.165688	0.00367066	1.16579	UP	AT1G75180	LDDH1	Erythronate-4-phosphate dehydrogenase family protein
BnaC02G0005000ZS	0.871675	0.844088	0.474686	0.509562	0.00367496	0.801755	UP	AT3G09390	MT2A	metallothionein, binds to and detoxifies excess copper and other metals, limiting oxidative damage
BnaC01G0039300ZS	0.783282	0.765041	0.513548	0.4854	0.00370698	0.632225	UP	AT4G34860	A/N-InvB	Plant neutral invertase family protein
BnaA07G0180000ZS	0.666156	0.738661	0.0833601	0.101	0.00371735	2.92978	UP	AT5G28540	BIP1	Encodes the luminal binding protein BiP, an ER-localized member of the HSP70 family. BiP is composed of an N-terminal ATP binding domain and a C-terminal domain that binds to hydrophobic patches on improperly/incompletely folded proteins in an ATP-dependent manner. Involved in polar nuclei fusion during proliferation of endosperm nuclei.
BnaA06G0057200ZS	0.533112	0.522436	0.34199	0.320452	0.00371847	0.672125	UP	AT1G09460	--	Carbohydrate-binding X8 domain superfamily protein
BnaC08G0450900ZS	0.458175	0.43557	0.256368	0.248892	0.00373503	0.822835	UP	AT2G21630	AtSEC23C	Sec23/Sec24 protein transport family protein
BnaC01G0097200ZS	1.07061	0.992231	0.359004	0.327735	0.00373925	1.5868	UP	AT4G29070	--	Phospholipase A2 family protein
BnaC03G0634600ZS	1.04813	1.08821	0.613231	0.64885	0.00373983	0.759336	UP	AT1G24575	--	--
BnaA06G0042100ZS	0.65366	0.656541	0.434279	0.405531	0.00375134	0.641652	UP	AT1G63770	--	Peptidase M1 family protein
BnaC07G0441700ZS	0.657505	0.630939	0.319224	0.346815	0.00376549	0.951952	UP	AT4G22350	--	Ubiquitin C-terminal hydrolases superfamily protein
BnaA06G0428000ZS	0.888208	0.923326	0.574531	0.551045	0.00377168	0.686548	UP	AT2G21790	RNR1	encodes large subunit of ribonucleotide reductase involved in the production of deoxyribonucleoside triphosphates (dNTPs) for DNA replication and repair
BnaC05G0348200ZS	0.744619	0.717268	0.471119	0.486019	0.00378609	0.611033	UP	AT1G31812	AtACBP6	Acyl-CoA-binding protein. Bind acyl-CoA esters and protect acyl-CoAs from degradation by microsomal acyl-hydrolases.
BnaC03G0552300ZS	0.774668	0.714113	0.245838	0.253821	0.00379142	1.57512	UP	AT5G62570	CBP60a	Calmodulin binding protein-like
BnaC02G0428900ZS	0.687304	0.741688	0.267154	0.274179	0.00379453	1.40041	UP	AT2G01690	VAC14	ARM repeat superfamily protein
BnaC05G0551100ZS	1.06146	1.12296	0.59681	0.594779	0.00382002	0.874365	UP	AT3G03700	--	Plasma-membrane choline transporter family protein
BnaA07G0252200ZS	0.645187	0.637225	0.36072	0.324558	0.00382313	0.904098	UP	AT1G74310	HSP101	Encodes ClpB1, which belongs to the Casein lytic proteinase/heat shock protein 100 (Clp/Hsp100) family. Involved in refolding of proteins which form aggregates under heat stress. Also known as AtHsp101. AtHsp101 is a cytosolic heat shock protein required for acclimation to high temperature.
BnaC03G0369100ZS	0.909356	0.889546	0.53074	0.569366	0.00383672	0.709473	UP	AT3G07170	IRP1	Sterile alpha motif (SAM) domain-containing protein
BnaA06G0117300ZS	1.02877	1.00421	0.669206	0.630836	0.00384158	0.645034	UP	AT1G17147	--	VQ motif-containing protein
BnaC06G0069900ZS	0.912149	0.87203	0.568248	0.561456	0.00384311	0.659315	UP	AT1G52760	LysoPL2	Encodes a lysophospholipase 2 (LysoPL2). Involved in tolerance to cadmium-induced oxidative stress. Binds Acyl-CoA-binding protein 2 (ACBP2).
BnaA08G0240500ZS	0.903787	0.878128	0.557871	0.58802	0.0038522	0.636959	UP	AT1G22065	--	--
BnaC08G0387800ZS	0.839789	0.856589	0.329327	0.261914	0.00392882	1.52064	UP	AT3G59350	MAZ	Protein kinase superfamily protein
BnaA02G0311700ZS	0.529417	0.512616	0.242116	0.208968	0.00393144	1.20793	UP	AT1G15120	--	Ubiquinol-cytochrome C reductase hinge protein
BnaA09G0404600ZS	0.407851	0.395711	0.206028	0.182786	0.00397338	1.04733	UP	AT1G30825	DIS2	Involved in trichome maturation. mutant displays enlarged trichomes
BnaC04G0616900ZS	0.693577	0.671709	0.428006	0.449768	0.00398082	0.63728	UP	AT2G47790	GTS1	Transducin/WD40 repeat-like superfamily protein
BnaA06G0121400ZS	0.656774	0.659518	0.418106	0.446561	0.00398293	0.606263	UP	AT1G17680	--	tetratricopeptide repeat (TPR)-containing protein
BnaA10G0048700ZS	0.981582	0.954264	0.55389	0.595663	0.00400538	0.75189	UP	AT1G06800	PLA-I{gamma}1	Encodes a lipase that hydrolyzes phosphatidylcholine, glycolipids as well as triacylglycerols.
BnaC05G0531300ZS	0.767089	0.766265	0.407655	0.358895	0.00402034	1.00024	UP	AT3G05940	--	Protein of unknown function (DUF300)
BnaC01G0243200ZS	1.58609	1.53888	0.351965	0.194655	0.00403319	2.51523	UP
BnaC08G0071600ZS	1.32174	1.29541	0.870135	0.817039	0.00403655	0.633389	UP	AT4G13580	--	Disease resistance-responsive (dirigent-like protein) family protein
BnaA03G0542000ZS	0.486597	0.4951	0.272138	0.297021	0.00403842	0.786446	UP	AT4G34150	--	Calcium-dependent lipid-binding (CaLB domain) family protein
BnaC09G0220500ZS	0.982853	0.910848	0.378745	0.364225	0.00404986	1.34983	UP	AT5G43850	ATARD4	RmlC-like cupins superfamily protein
BnaC05G0246900ZS	0.888208	0.883181	0.460754	0.402915	0.00406584	1.03633	UP	AT1G28440	HSL1	HAESA-like 1
BnaC08G0117400ZS	1.14521	1.16858	0.351965	0.244377	0.00408438	1.95605	UP	AT2G04063	GPRP5	glycine-rich protein
BnaC03G0262400ZS	0.838956	0.872733	0.511949	0.480398	0.00410306	0.786503	UP	AT1G14620	DECOY	decoy
BnaA07G0138000ZS	1.00174	1.03874	0.457554	0.515475	0.00412031	1.06835	UP	AT2G19460	--	Protein of unknown function (DUF3511)
BnaC03G0104100ZS	0.728645	0.728999	0.423087	0.460144	0.0041365	0.722776	UP	AT5G21090	--	Leucine-rich repeat (LRR) family protein
BnaC06G0264600ZS	0.872347	0.879358	0.586608	0.547197	0.00417068	0.627588	UP	AT1G76870	--	--
BnaC05G0149700ZS	0.663086	0.678482	0.451604	0.425661	0.00419509	0.612835	UP	AT1G17710	PEPC1	Encodes a phosphoethanolamine/phosphocholine phosphatase. It is likely to be involved in the liberation of inorganic phosphate from intracellular sources. Expression is upregulated in the shoot of cax1/cax3 mutant.
BnaC04G0373500ZS	0.659301	0.625168	0.296563	0.264063	0.00421273	1.19606	UP	--	--	--
BnaC08G0082700ZS	1.19078	1.19822	0.732779	0.788795	0.00421693	0.650845	UP	AT1G42960	CTI1	expressed protein localized to the inner membrane of the chloroplast.
BnaA09G0648400ZS	0.456793	0.439679	0.287971	0.274513	0.00422236	0.672445	UP	AT1G12250	TL20.3	Pentapeptide repeat-containing protein
BnaA06G0273600ZS	0.651919	0.646328	0.434279	0.40485	0.00423009	0.629601	UP	AT5G62050	OXA1AT	essential factor for protein sorting and assembly into membranes
Bnascaffold0027G0009000ZS	1.6314	1.47732	0.377105	0.356867	0.00425514	2.08252	UP	AT5G45470	--	Protein of unknown function (DUF594)
BnaC02G0186200ZS	0.5082	0.531847	0.326766	0.334359	0.00426851	0.653653	UP	AT5G52300	RD29B	encodes a protein that is induced in expression in response to water deprivation such as cold, high-salt, and dessication. The response appears to be via abscisic acid. The promoter region contains two ABA-responsive elements (ABREs) that are required for the dehydration-responsive expression of rd29B as cis-acting elements. Protein is a member of a gene family with other members found plants, an…
BnaC03G0524400ZS	0.561575	0.575005	0.386612	0.365249	0.00427452	0.596163	UP	AT5G65207	--	--
BnaA01G0386600ZS	0.721413	0.708982	0.455484	0.485117	0.00427687	0.60476	UP	AT3G07160	GSL10	Encodes GSL10, a member of the Glucan Synthase-Like (GSL) family believed to be involved in the synthesis of the cell wall component callose. GSL10 is required for male gametophyte development and plant growth. Has a role in entry of microspores into mitosis. GSL10 mutation leads to perturbation of microspore division symmetry, irregular callose deposition and failure of generative cell engulfmen…
BnaC01G0195300ZS	0.837775	0.823566	0.518336	0.554309	0.00428881	0.631174	UP	AT4G25900	--	Galactose mutarotase-like superfamily protein
BnaA10G0055400ZS	0.836797	0.861771	0.377105	0.315915	0.004292	1.29335	UP	AT1G07570	PBL9	Protein kinase capable of phosphorylating tyrosine, serine, and threonine residues
BnaA04G0221900ZS	0.553946	0.567674	0.354651	0.376384	0.00430317	0.617572	UP	AT2G34520	RPS14	nuclear-encoded mitochondrial ribosomal protein S14
BnaC06G0236100ZS	0.768642	0.831756	0.319047	0.323998	0.00434453	1.31544	UP	AT5G61310	--	Cytochrome c oxidase subunit Vc family protein
BnaC04G0058100ZS	0.690414	0.753469	0.242178	0.24674	0.00435398	1.56229	UP	AT2G45380	--	--
BnaC02G0403000ZS	0.536142	0.495117	0.205694	0.200003	0.00435502	1.34593	UP	AT5G45840	MDIS1	Leucine-rich repeat protein kinase family protein
BnaA06G0115900ZS	0.77854	0.741702	0.477878	0.482371	0.00436309	0.66282	UP	AT1G78570	ROL1	Encodes a UDP-L-Rhamnose synthase involved in the biosynthesis of rhamnose, a major monosaccharide component of pectin. Catalyzes the conversion of UDP-D-Glc to UDP-L-Rha. The dehydrogenase domain of RHM1 was shown to catalyze the conversion of UDP-D-Glc to the reaction intermediate UDP-4-keto-6-deoxy-D-Glc using recombinant protein assay but the activity of the full-length protein was not determ…
BnaC01G0178900ZS	0.742587	0.725387	0.466072	0.494952	0.00436765	0.611182	UP	AT4G24400	SnRK3.13	Encodes a CBL (calcineurin B-like calcium sensor proteins) -interacting serine/threonine protein kinase. Regulates the low-affinity phase of the primary nitrate response.
BnaC05G0385500ZS	0.749172	0.814699	0.280135	0.288893	0.00438683	1.45855	UP	AT3G20510	FAX6	Transmembrane proteins 14C
BnaA07G0181600ZS	0.728259	0.774829	0.371858	0.388667	0.00441618	0.982861	UP	AT3G52870	--	IQ calmodulin-binding motif family protein
BnaA08G0262000ZS	0.472248	0.494558	0.279144	0.261521	0.0044216	0.83849	UP	AT1G17380	TIFY11A	jasmonate-zim-domain protein 5
BnaA05G0330000ZS	1.01765	1.07654	0.564627	0.586983	0.00443713	0.862742	UP	AT1G31812	AtACBP6	Acyl-CoA-binding protein. Bind acyl-CoA esters and protect acyl-CoAs from degradation by microsomal acyl-hydrolases.
BnaA06G0081700ZS	1.07646	1.10799	0.50016	0.421752	0.00445074	1.24457	UP	AT1G12560	EXPA7	Member of Alpha-Expansin Gene Family. Naming convention from the Expansin Working Group (Kende et al, 2004. Plant Mol Bio). Containing a conserved root hair-specific cis-element RHE. Expressed specifically in root hair cell and involved in root hair elongation.
BnaC01G0233200ZS	0.550956	0.602169	0.137725	0.104449	0.00446489	2.25143	UP	AT5G10730	--	NAD(P)-binding Rossmann-fold superfamily protein
BnaC06G0351600ZS	0.734939	0.712787	0.448313	0.416063	0.00446801	0.744058	UP	AT4G39670	GLTP	Glycolipid transfer protein (GLTP) family protein
BnaA06G0421700ZS	0.942921	0.96245	0.596069	0.548853	0.00448432	0.734822	UP	AT4G17870	RCAR11	Encodes a member of the PYR (pyrabactin resistance )/PYL(PYR1-like)/RCAR (regulatory components of ABA receptor) family proteins with 14 members. PYR/PYL/RCAR family proteins function as abscisic acid sensors. Mediate ABA-dependent regulation of protein phosphatase 2Cs ABI1 and ABI2.
BnaC03G0053000ZS	0.67718	0.628019	0.2867	0.287456	0.00449285	1.18476	UP	AT5G11740	ATAGP15	Encodes arabinogalactan protein (AGP15).
BnaA06G0362500ZS	0.650482	0.695745	0.337562	0.336102	0.00450343	0.99882	UP	AT5G48657	--	defense protein-related
BnaA08G0137200ZS	0.523306	0.493473	0.280254	0.285828	0.00450375	0.844922	UP	AT4G34150	--	Calcium-dependent lipid-binding (CaLB domain) family protein
BnaA01G0154100ZS	0.747039	0.746804	0.47709	0.438082	0.0045136	0.706913	UP	AT4G25900	--	Galactose mutarotase-like superfamily protein
BnaC09G0564500ZS	0.820279	0.756867	0.320662	0.314198	0.00454459	1.3128	UP	AT5G08740	NDC1	NAD(P)H dehydrogenase C1
BnaC02G0316900ZS	1.03369	0.971922	0.527947	0.54191	0.00454866	0.906625	UP	AT1G79190	--	ARM repeat superfamily protein
BnaC07G0213000ZS	0.667863	0.64594	0.328582	0.286618	0.00456169	1.09462	UP	AT5G66630	DAR5	--
BnaC01G0491500ZS	0.716928	0.715398	0.370442	0.320125	0.00457412	1.05251	UP	AT3G07090	Desi1	PPPDE putative thiol peptidase family protein
BnaC07G0379500ZS	0.913694	0.929789	0.612205	0.570233	0.00459251	0.640669	UP	AT5G61210	SNP33	membrane localized t-SNARE SNAP25 homologue, probably involved in cytokinesis and cell plate formation
BnaA06G0151400ZS	0.468117	0.476913	0.287791	0.262421	0.00459333	0.780373	UP	AT1G21380	TOL3	Target of Myb protein 1
BnaC08G0303200ZS	0.5652	0.543957	0.365114	0.348371	0.00464072	0.63651	UP	AT3G50060	MYB77	Encodes a member of the R2R3 transcription factor gene family. Expressed in response to potassium deprivation and auxin. Involved in lateral root development. Interacts with ARF7 and regulates the expression of some auxin responsive genes.
BnaA07G0129100ZS	1.47189	1.42392	0.844715	0.907038	0.00469194	0.725168	UP	AT3G43660	--	The gene encodes a putative nodulin-like21 protein.
BnaC01G0428300ZS	0.475826	0.490517	0.239976	0.207213	0.00474932	1.11165	UP	AT3G15780	--	--
BnaC05G0430700ZS	0.688522	0.655263	0.43063	0.432359	0.00476371	0.63889	UP	AT3G17205	UPL6	ubiquitin protein ligase 6
BnaC01G0080800ZS	1.002	1.04378	0.688248	0.664512	0.00477412	0.596746	UP	AT4G30530	GGP1	Encodes a gamma-glutamyl peptidase, outside the GGT family, that can hydrolyze gamma-glutamyl peptide bonds.
BnaC07G0081700ZS	0.801701	0.810781	0.553798	0.517349	0.00478027	0.590128	UP	AT2G05940	RIPK	Encodes a receptor-like cytoplasmic kinase that phosphorylates the host target RIN4, leading to the activation of a plant innate immune receptor RPM1.
BnaA03G0402900ZS	0.557996	0.55801	0.284097	0.319727	0.00480454	0.886144	UP	AT5G23130	--	Peptidoglycan-binding LysM domain-containing protein
BnaA02G0054900ZS	0.821992	0.857374	0.520715	0.490543	0.00480905	0.731765	UP	AT5G14700	--	NAD(P)-binding Rossmann-fold superfamily protein
BnaC09G0592800ZS	0.462985	0.491448	0.270192	0.262941	0.00482515	0.840147	UP	AT5G05370	--	Cytochrome b-c1 complex, subunit 8 protein
BnaA03G0296200ZS	1.11162	1.0596	0.714475	0.710837	0.00485173	0.60723	UP	AT3G04720	PR4	Encodes a protein similar to the antifungal chitin-binding protein hevein from rubber tree latex. mRNA levels increase in response to ethylene and turnip crinkle virus infection.
BnaC04G0014800ZS	0.670482	0.639225	0.425498	0.430842	0.0048564	0.612988	UP	AT2G46490	--	--
BnaA03G0438000ZS	0.659503	0.623579	0.385654	0.382358	0.00486956	0.740413	UP	AT4G17030	EXPR	Encodes EXLB1 (expansin-like B1), a member of the expansin family.
BnaA05G0454800ZS	1.11249	1.1616	0.718907	0.682509	0.00487049	0.698409	UP	AT3G07790	--	DGCR14-related
BnaC09G0107000ZS	1.06146	1.1616	0.279501	0.332256	0.00489857	1.86152	UP	AT2G14860	--	Peroxisomal membrane 22 kDa (Mpv17/PMP22) family protein
BnaA01G0292700ZS	1.42748	1.31396	0.495624	0.535301	0.00490568	1.411	UP	AT3G08810	--	Galactose oxidase/kelch repeat superfamily protein
BnaC07G0265000ZS	0.811197	0.778967	0.421166	0.459389	0.00492779	0.85269	UP	AT2G01180	PAP1	Encodes phosphatidate phosphatase. Up-regulated by genotoxic stress (gamma ray or UV-B) and elicitor treatments with mastoparan and harpin. Expressed in roots and leaves.
BnaC01G0152200ZS	0.727734	0.789738	0.311969	0.319534	0.00493406	1.26481	UP	AT4G22270	MRB1	Encodes a plasma membrane protein involved in the positive regulation of organ size development. Overexpression results in organ size enlargement.
BnaA09G0019600ZS	0.590551	0.559952	0.340233	0.35087	0.0049355	0.735294	UP	AT1G01050	PPa1	Encodes a soluble protein with inorganic pyrophosphatase activity that is highly specific for Mg-inorganic pyrophosphate.
BnaC07G0224100ZS	0.911441	0.868037	0.42551	0.371433	0.0049437	1.15891	UP	AT5G43970	TOM9-2	Subunit of the TOM complex, a translocase in the outer mitochondrial membrane that selectively allows proteins with a mitochondrial targeting sequence to enter the mitochondrion.
BnaC01G0172400ZS	0.714626	0.677874	0.397194	0.41534	0.00495754	0.777178	UP	AT4G23810	WRKY53	member of WRKY Transcription Factor; Group III
BnaC07G0484600ZS	0.984467	0.923326	0.478836	0.502528	0.00497224	0.959045	UP	AT4G28610	PHR1	Similar to phosphate starvation response gene from Chlamydomonas. Weakly responsive to phosphate starvation. Acts upstream of PHO2 in phosphate signaling.
BnaA02G0086500ZS	1.03746	0.971499	0.527947	0.538993	0.00500206	0.912967	UP	AT5G20610	PMIR1	--
BnaC09G0101500ZS	0.535836	0.588403	0.164662	0.181752	0.00501219	1.69838	UP	AT5G66210	CPK28	member of Calcium Dependent Protein Kinase
BnaC03G0281000ZS	0.793333	0.755136	0.277042	0.212147	0.0050154	1.66238	UP	AT2G24850	TAT3	Encodes a tyrosine aminotransferase that is responsive to treatment with jasmonic acid.
BnaC03G0345800ZS	1.18346	1.1855	0.522541	0.610484	0.00502746	1.06408	UP	AT3G02480	ABR	Late embryogenesis abundant protein (LEA) family protein
BnaA09G0249800ZS	0.951652	1.02052	0.479952	0.452947	0.00502795	1.07999	UP	AT4G11400	--	ARID/BRIGHT DNA-binding domain;ELM2 domain protein
BnaA01G0102900ZS	1.19724	1.2824	0.406113	0.480995	0.00503213	1.48295	UP	AT4G19390	--	Uncharacterised protein family (UPF0114)
BnaA02G0262700ZS	0.522188	0.522904	0.333702	0.304741	0.00503711	0.711	UP	AT4G12340	--	copper ion binding
BnaC09G0044400ZS	0.671754	0.633138	0.381295	0.381601	0.00503833	0.774372	UP	AT5G27560	--	Domain of unknown function (DUF1995)
BnaA09G0640300ZS	0.489541	0.520776	0.280885	0.28606	0.00506048	0.833526	UP	AT1G13470	--	Protein of unknown function (DUF1262)
BnaA01G0040400ZS	0.42008	0.450217	0.215955	0.204635	0.00508525	1.04909	UP	AT4G34140	--	D111/G-patch domain-containing protein
BnaC09G0050300ZS	1.35212	1.29351	0.874579	0.843099	0.00510126	0.62315	UP	AT5G26210	AL4	Encodes a member of the Alfin1-like family of nuclear-localized PHD (plant homeodomain) domain containing proteins. All AL proteins except AL3 bind to di- or trimethylated histone H3 (H3K4me3/2). Members of this family include: AT5G05610 (AL1), AT3G11200 (AL2), AT3G42790 (AL3), AT5G26210 (AL4), AT5G20510 (AL5), AT2G02470 (AL6), AT1G14510 (AL7).
BnaC02G0126100ZS	0.631769	0.699283	0.195851	0.189586	0.00510223	1.788	UP	AT5G59670	--	Leucine-rich repeat protein kinase family protein
BnaC01G0083900ZS	0.913737	0.931117	0.534308	0.583478	0.00510564	0.722863	UP	AT2G18840	YIP4a	Encodes one of the two YPT/RAB GTPase Interacting Protein 4a (YIP4a) and YIP4b (formerly YIP2), which form a TGN-localized complex with ECHIDNA (ECH). This complex is required for the secretion of cell wall polysaccharides.
BnaC03G0643500ZS	0.912543	0.962616	0.531147	0.496605	0.00511373	0.867521	UP	AT1G27530	--	--
BnaA09G0103300ZS	0.831421	0.827941	0.432335	0.370874	0.00513011	1.04678	UP	AT2G12400	--	--
BnaC05G0138400ZS	0.194331	0.206151	0.118117	0.117996	0.00513208	0.762259	UP	AT1G16570	TUN	UDP-Glycosyltransferase superfamily protein
BnaC05G0557300ZS	0.91505	1.04923	0.0527947	0.0446084	0.00514543	4.33389	UP	AT3G04300	--	RmlC-like cupins superfamily protein
BnaA06G0384100ZS	0.761321	0.778149	0.505083	0.467907	0.00514921	0.661936	UP	AT3G27280	PHB4	Part of protein complexes that are necessary for proficient mitochondrial function or biogenesis, thereby supporting cell division and differentiation in apical tissues
BnaC03G0276900ZS	0.931914	0.923326	0.583893	0.629376	0.00515848	0.612706	UP	--	--	--
BnaC05G0243400ZS	0.516611	0.565301	0.170305	0.18893	0.00516333	1.59058	UP	AT1G27650	ATU2AF35A	U2 auxiliary factor small subunit. The atU2AF35a protein and its homolog, atU2AF35b, contain most of the conserved domains of hsU2AF35, including the psiRRM, one RS domain, two zinc fingers, and the two regions for interacting with U2AF large subunit. Both proteins lack the stretch of glycines present in human U2AF35. The sequences are overall 83% identical, and each Arabidopsis homolog shows app…
BnaC03G0575200ZS	0.390421	0.382712	0.219789	0.241012	0.00518597	0.746571	UP	AT3G47810	VPS29	Homolog of yeast retromer subunit VPS29. Part of a retromer-like protein complex involved in endosome to lysosome protein transport.
BnaC09G0354500ZS	0.487968	0.505362	0.338439	0.321695	0.00520939	0.589515	UP	AT5G53300	UBC10	Encodes a ubiquitin conjugating enzyme.
BnaC05G0127800ZS	0.941634	0.926565	0.579454	0.526177	0.00523037	0.756779	UP	AT1G15370	LOLITA	SNARE-like superfamily protein
BnaC03G0472600ZS	0.597549	0.583153	0.179727	0.233586	0.00523643	1.51434	UP	AT3G25470	--	bacterial hemolysin-related
BnaC07G0260400ZS	0.780455	0.792856	0.426734	0.474007	0.00523873	0.804619	UP	AT5G47540	--	Mo25 family protein
BnaA03G0302200ZS	1.33231	1.36652	0.263974	0.407848	0.0052807	2.00619	UP	AT5G19090	AtHMP46	Heavy metal transport/detoxification superfamily protein
BnaA09G0610900ZS	0.780583	0.748003	0.491091	0.511394	0.00528224	0.608618	UP	AT1G19020	SDA1	--
BnaA07G0186500ZS	0.951652	0.923326	0.107379	0.217014	0.0052907	2.53106	UP	AT3G54000	--	--
BnaC03G0290200ZS	0.746866	0.723688	0.439956	0.400124	0.00530048	0.807761	UP	AT5G50340	RADA	ATP-dependent peptidases;nucleotide binding;serine-type endopeptidases;DNA helicases;ATP binding;damaged DNA binding;nucleoside-triphosphatases
BnaC06G0018600ZS	1.14198	1.07721	0.39596	0.305886	0.00530348	1.66081	UP
BnaC08G0331500ZS	1.15518	1.13037	0.774072	0.721939	0.0053047	0.611426	UP	AT3G52960	PrxIIE	Thioredoxin superfamily protein
BnaA07G0020900ZS	0.828012	0.844184	0.469286	0.413791	0.00532287	0.921132	UP	AT2G18250	COAD	At2g18250 encodes pantetheine-phosphate adenylyltransferase catalyzing the formation of dephospho-CoA from pantetheine 4'-phosphate. The enzyme is involved in coenzyme A biosynthesis.
BnaA09G0457800ZS	0.429093	0.452819	0.231317	0.248818	0.00534147	0.877194	UP	AT1G22882	SUN3	Galactose-binding protein
BnaC07G0094900ZS	0.440765	0.450024	0.252693	0.223708	0.00534846	0.902909	UP	AT3G25160	--	ER lumen protein retaining receptor family protein
BnaA06G0417900ZS	0.951652	0.99172	0.389014	0.45883	0.00535564	1.19669	UP	AT5G47190	PRPL19	Ribosomal protein L19 family protein
BnaA09G0167500ZS	0.684287	0.709988	0.416141	0.445673	0.0053627	0.694067	UP	AT3G62290	ATARFA1E	A member of ARF GTPase family. A thaliana has 21 members of this family, known to be essential for vesicle coating and uncoating and functions in GTP-binding. The gene is shown to play a role in cell division, cell expansion and cellulose production using antisense construct.
BnaA04G0136000ZS	0.607552	0.599686	0.378293	0.408245	0.00537491	0.618121	UP	AT5G41000	YSL4	Arabidopsis thaliana metal-nicotianamine transporter YSL4
BnaC06G0127100ZS	0.711218	0.742822	0.28479	0.337255	0.00537583	1.22498	UP	AT1G53210	NCL	Encodes a Na+/Ca 2+ exchanger-like protein that participates in the maintenance of Ca 2+ homeostasis.
BnaA06G0439000ZS	0.893851	0.936024	0.52706	0.483898	0.0053862	0.856022	UP	AT5G43970	TOM9-2	Subunit of the TOM complex, a translocase in the outer mitochondrial membrane that selectively allows proteins with a mitochondrial targeting sequence to enter the mitochondrion.
BnaC08G0027800ZS	0.671107	0.651916	0.416633	0.383108	0.00540547	0.726234	UP	AT1G07140	SIRANBP	Encodes a putative Ran-binding protein (siRanBP).
BnaC09G0147600ZS	0.721582	0.71173	0.335043	0.274884	0.0054367	1.23264	UP	AT1G64220	TOM7-2	translocase of outer membrane 7 kDa subunit 2
BnaC01G0301800ZS	0.54088	0.563715	0.299327	0.266531	0.00545747	0.965006	UP	AT3G45040	EVN	Encodes a putative dolichol kinase.
BnaC04G0007000ZS	0.521873	0.551239	0.216594	0.175357	0.00547814	1.45306	UP	AT2G47350	IES2A	HIT zinc finger ;PAPA-1-like conserved region
BnaC01G0004700ZS	0.543801	0.564255	0.281572	0.243319	0.00548745	1.07794	UP	AT4G39300	--	--
BnaA02G0136900ZS	1.14758	1.09411	0.738835	0.714794	0.00548795	0.624931	UP	AT5G53880	--	--
BnaA08G0058700ZS	0.895672	0.848864	0.267315	0.338085	0.00550234	1.52688	UP	AT1G43890	RABC1	ras-related small GTPase
BnaC03G0532700ZS	0.674301	0.642348	0.442059	0.434464	0.00552221	0.587008	UP	AT5G64350	FKP12	Encodes FK506-binding protein 12 (FKBP12 or FKP12). FKP12 overexpression dramatically enhances rapamycin sensitivity, whereas rapamycin inhibition is relieved in transgenic plants deficient in FKP12.
BnaC03G0651200ZS	0.944712	0.918532	0.547737	0.492098	0.0055307	0.841462	UP	AT1G28380	NSL1	This gene is predicted to encode a protein involved in negatively regulating salicylic acid-related defense responses and cell death programs. nsl1 mutants develop necrotic lesions spontaneously and show other features of a defense response, such as higher levels of SA and disease resistance-related transcripts, in the absence of a biotic stimulus. The NSL1 protein is predicted to have a MACPF do…
BnaA03G0243000ZS	0.414248	0.434506	0.153585	0.185807	0.00553726	1.3224	UP	AT2G23390	--	--
BnaC03G0227600ZS	0.877161	0.910462	0.598167	0.565475	0.00554665	0.619396	UP	AT2G39770	VTC1	Encodes a GDP-mannose pyrophosphorylase/ mannose-1-pyrophosphatase. This enzyme provides GDP-mannose, which is used for cell wall carbohydrate biosynthesis and protein glycosylation as well as for ascorbate (vitamin C) biosynthesis. Mutations in this gene confer hypersensitivity to NH4+.
BnaA08G0263700ZS	0.553227	0.578531	0.365963	0.347579	0.00554686	0.665495	UP	AT1G17080	--	Ribosomal protein L18ae family
BnaC09G0462800ZS	0.637607	0.606161	0.406588	0.41157	0.0055491	0.604267	UP	AT5G20230	SAG14	Al-stress-induced gene
BnaC07G0461000ZS	1.04375	1.06182	0.615938	0.54775	0.00556275	0.855507	UP	AT4G25010	SWEET14	Encodes a member of the SWEET sucrose efflux transporter family proteins.
BnaA05G0451300ZS	0.557456	0.534284	0.336109	0.312326	0.00556368	0.751596	UP	AT3G08720	S6K2	Encodes a ribosomal-protein S6 kinase. Gene expression is induced by cold and salt (NaCl). Activation of AtS6k is regulated by 1-naphthylacetic acid and kinetin, at least in part, via a lipid kinase-dependent pathway. Phosphorylates specifically mammalian and plant S6 at 25 degrees C but not at 37 degrees C. Involved in translational up-regulation of ribosomal proteins.
BnaC02G0314400ZS	0.914332	0.88975	0.463111	0.519557	0.00557076	0.876488	UP	AT1G78810	--	--
BnaA10G0213600ZS	0.749072	0.793113	0.476188	0.478564	0.0055899	0.691779	UP	AT5G14700	--	NAD(P)-binding Rossmann-fold superfamily protein
BnaC03G0095800ZS	0.951652	0.866796	0.316768	0.338085	0.00560627	1.47346	UP	AT5G19430	C3HC4	RING/U-box superfamily protein
BnaC08G0503600ZS	0.930314	0.894727	0.599089	0.56415	0.00563079	0.649782	UP	AT1G12760	--	Zinc finger, C3HC4 type (RING finger) family protein
BnaC09G0161700ZS	0.627463	0.633138	0.363505	0.32037	0.00564266	0.882308	UP	AT1G63700	YDA	Member of MEKK subfamily, a component of the stomatal development regulatory pathway. Mutations in this locus result in embryo lethality.
BnaA10G0056200ZS	0.453999	0.438414	0.174659	0.20978	0.00567296	1.21495	UP	AT1G47830	AP2S	SNARE-like superfamily protein
BnaC09G0585200ZS	0.500138	0.515824	0.25647	0.218644	0.00568381	1.0965	UP	AT5G06300	LOG7	Putative lysine decarboxylase family protein
BnaC09G0583700ZS	0.485035	0.51683	0.242659	0.216596	0.00569167	1.12532	UP	AT5G06440	--	--
BnaA03G0261900ZS	0.890056	0.840379	0.536976	0.528421	0.00569617	0.699744	UP	AT4G04340	OSCA1.1	ERD (early-responsive to dehydration stress) family protein
BnaA07G0281400ZS	0.605009	0.580089	0.344389	0.313033	0.00571203	0.850114	UP	AT5G45010	DSS1(V)	DSS1 homolog on chromosome V
BnaC07G0549400ZS	1.07826	1.03087	0.607939	0.553802	0.00571874	0.860357	UP	AT3G45970	EXPL1	member of EXPANSIN-LIKE. Naming convention from the Expansin Working Group (Kende et al, 2004. Plant Mol Bio)
BnaC03G0799800ZS	0.540845	0.520356	0.335094	0.311053	0.0057419	0.715765	UP	AT1G53320	TLP7	Member of TLP family
BnaC08G0389200ZS	0.844591	0.8901	0.531364	0.50364	0.0057506	0.745042	UP	AT3G59540	--	Ribosomal L38e protein family
BnaA06G0324800ZS	1.16352	1.21918	0.757912	0.716578	0.00577641	0.692382	UP	AT5G23990	FRO5	Encodes a ferric chelate reductase that is expressed at low levels in roots,shoots and flowers, but not cotyledons.
BnaA06G0302300ZS	0.951652	0.923326	0.517173	0.454195	0.00578949	0.948784	UP	AT5G65290	--	LMBR1-like membrane protein
BnaC06G0413600ZS	0.795303	0.856032	0.411102	0.387205	0.00580233	1.04862	UP	AT1G75280	--	isoflavone reductase, putative, identical to SP:P52577 Isoflavone reductase homolog P3 (EC 1.3.1.-) {Arabidopsis thaliana}; contains Pfam profile PF02716: isoflavone reductase. Involved in response to oxidative stress.
BnaC09G0282500ZS	0.518379	0.491641	0.32436	0.314883	0.0058028	0.659949	UP	AT4G22310	MPC3	Uncharacterised protein family (UPF0041)
BnaC01G0084400ZS	0.558072	0.557843	0.302897	0.260624	0.00580568	0.985685	UP	AT4G30210	ATR2	Encodes NADPH-cytochrome P450 reductase that catalyzes the first oxidative step of the phenylpropanoid general pathway.
BnaA02G0162000ZS	0.63748	0.685414	0.326124	0.303271	0.00581224	1.07166	UP	AT1G66880	--	Protein kinase superfamily protein
BnaA02G0397100ZS	1.14198	1.10799	0.624917	0.688244	0.00583464	0.776863	UP	AT5G62150	--	peptidoglycan-binding LysM domain-containing protein
BnaC03G0733900ZS	0.708816	0.667354	0.263429	0.207701	0.00583882	1.54646	UP	AT4G23060	IQD22	IQ-domain 22
BnaC08G0395600ZS	1.02128	0.961012	0.58352	0.596285	0.00584233	0.748625	UP	AT3G60390	HAT3	Encodes homeobox protein HAT3.
BnaC03G0030200ZS	0.487431	0.553995	0.0659934	0.0382358	0.00586963	3.32073	UP	AT5G06710	HAT14	Homeobox-leucine zipper protein.
BnaC06G0145700ZS	0.64042	0.672103	0.419813	0.398567	0.00590707	0.681499	UP	AT4G15090	FAR1	Encodes a nuclear localized protein involved in far red light response signaling. Loss of function mutants are defective in far red light responses. Interacts with homologous gene FHY3.
BnaA04G0281800ZS	0.817795	0.825199	0.510778	0.459334	0.00591326	0.760104	UP	AT2G44450	BGLU15	beta glucosidase 15
BnaC02G0547400ZS	0.946151	0.891986	0.420356	0.469651	0.00591391	1.04636	UP	AT5G65207	--	--
BnaC03G0615200ZS	0.865138	0.923326	0.511949	0.51908	0.00593703	0.794636	UP	AT3G46990	OPL3	Protein of unknown function (DUF740)
BnaA09G0132800ZS	0.824765	0.843037	0.203057	0.291982	0.00593899	1.75233	UP	AT1G63310	--	--
BnaA01G0390200ZS	0.7314	0.753809	0.418106	0.459506	0.00594947	0.759011	UP	AT3G06550	RWA2	Encodes a homolog of the protein Cas1p known to be involved in polysaccharide O-acetylation in Cryptococcus neoformans. Mutants show reduced cell wall polysaccharide acetylation and increased resistance to Botrytis cinerea. The protein is expressed in the Golgi and is involved in the acetylation of xylan during secondary wall biosynthesis.
BnaA06G0101300ZS	0.356869	0.383855	0.191153	0.182019	0.00595432	0.989094	UP	AT1G15200	PININ	protein-protein interaction regulator family protein
BnaC08G0148900ZS	0.815701	0.769438	0.377105	0.417353	0.00596092	0.996566	UP	AT5G47620	--	RNA-binding (RRM/RBD/RNP motifs) family protein
BnaA02G0176200ZS	0.607304	0.648048	0.356626	0.364625	0.00598965	0.799517	UP	AT1G68760	NUDX1	Encodes a cytosol-localized nudix hydrolase that hydrolyzes 8-oxo-(d)GTP to its monophosphate form. This protective mechanism prevents the misincorporation of these oxidized nucleotides into DNA and RNA. NUDX1 also has a low level of dihydroneopterin triphosphate pyrophosphatase activity in vitro and may participate in the folate synthesis pathway.
BnaA05G0051100ZS	0.814063	0.841856	0.558115	0.523135	0.00598989	0.614931	UP	AT2G45330	TRPT	RNA 2'-phosphotransferase, Tpt1 / KptA family
BnaC03G0039000ZS	0.69211	0.651759	0.32489	0.356867	0.00599216	0.979062	UP
BnaC08G0213300ZS	0.532925	0.549004	0.247124	0.200471	0.00599722	1.27334	UP	AT1G11930	--	Predicted pyridoxal phosphate-dependent enzyme, YBL036C type
BnaC05G0559000ZS	0.941965	0.953141	0.536294	0.467842	0.00600536	0.916324	UP	AT3G01390	VMA10	Subunit G of the vacuolar membrane ATPAse complex
BnaA02G0281400ZS	0.699924	0.741356	0.415239	0.38782	0.00600552	0.843773	UP	AT5G43130	TAF4B	TBP-associated factor 4
BnaA03G0109400ZS	0.507547	0.527615	0.284279	0.250922	0.00600785	0.951703	UP	AT5G57840	--	encodes a protein whose sequence is similar to anthranilate N-hydroxycinnamoyl/benzoyltransferase from Dianthus caryophyllus (gi:2239091)
BnaC02G0532200ZS	1.47846	1.5601	0.805527	0.873112	0.00601934	0.856095	UP	AT5G62420	--	NAD(P)-linked oxidoreductase superfamily protein
BnaA01G0371900ZS	1.08069	1.02116	0.344925	0.429605	0.00602649	1.44027	UP	AT3G11740	--	Protein of unknown function (DUF567)
BnaC09G0014800ZS	0.496514	0.470715	0.272872	0.249681	0.00603072	0.888281	UP	AT4G03020	--	transducin family protein / WD-40 repeat family protein
BnaC02G0064400ZS	0.819796	0.799465	0.384621	0.443008	0.00604411	0.96828	UP	AT5G14700	--	NAD(P)-binding Rossmann-fold superfamily protein
BnaC03G0293500ZS	0.68295	0.688072	0.394559	0.345538	0.00604741	0.889465	UP	AT4G08500	MEKK1	Encodes a member of the A1 subgroup of the MEKK (MAPK/ERK kinase kinase) family. MEKK is another name for Mitogen-Activated Protein Kinase Kinase Kinase (MAPKKK or MAP3K). This subgroup has four members: At4g08500 (MEKK1, also known as ARAKIN, MAP3Kb1, MAPKKK8), At4g08480 (MEKK2, also known as MAP3Kb4, MAPKKK9), At4g08470 (MEKK3, also known as MAP3Kb3, MAPKKK10) and At4g12020 (MEKK4, also known a…
BnaA05G0383100ZS	1.16959	1.10646	0.618605	0.560449	0.0060657	0.948903	UP	AT3G17611	RBL14	RHOMBOID-like protein 14
BnaC08G0302800ZS	0.560512	0.542735	0.369163	0.344327	0.00608463	0.628792	UP	AT3G50060	MYB77	Encodes a member of the R2R3 transcription factor gene family. Expressed in response to potassium deprivation and auxin. Involved in lateral root development. Interacts with ARF7 and regulates the expression of some auxin responsive genes.
BnaA05G0169500ZS	0.485536	0.49244	0.243668	0.202546	0.00609244	1.13206	UP	AT1G51920	--	--
BnaC07G0353900ZS	0.964447	0.94692	0.584236	0.635725	0.00613153	0.647771	UP	AT5G26030	FC1	encodes ferrochelatase I located in plastids. Involved in heme biosynthesis in non-photosynthetic tissues and induced by oxidative stress in photosynthetic tissues to supply heme for defensive hemoproteins
BnaC09G0369600ZS	0.570991	0.61555	0.140786	0.191179	0.0061391	1.83766	UP	AT5G54570	BGLU41	beta glucosidase 41
BnaA03G0279800ZS	0.615209	0.64497	0.254197	0.301107	0.00615442	1.18228	UP	AT4G00520	--	Acyl-CoA thioesterase family protein
BnaC09G0456000ZS	0.750265	0.779321	0.480938	0.511712	0.00615588	0.623784	UP	AT5G20920	EMB1401	protein synthesis initiation factor eIF2 beta
BnaC05G0100700ZS	0.888869	0.861575	0.513465	0.559528	0.00618868	0.70608	UP	AT1G12610	DDF1	Encodes a member of the DREB subfamily A-1 of ERF/AP2 transcription factor family (DDF1). The protein contains one AP2 domain. There are six members in this subfamily, including CBF1, CBF2, and CBF3. Overexpression of this gene results in delayed flowering and dwarfism, reduction of gibberellic acid biosynthesis, and increased tolerance to high levels of salt. This gene is expressed in all tissue…
BnaC07G0234200ZS	0.887775	0.839575	0.544142	0.555826	0.00619126	0.6511	UP	AT5G44720	--	Molybdenum cofactor sulfurase family protein
BnaA08G0290700ZS	0.722458	0.728941	0.299372	0.361594	0.00620566	1.1348	UP	AT1G10090	--	Early-responsive to dehydration stress protein (ERD4)
BnaC01G0083700ZS	1.00045	1.01453	0.624118	0.559845	0.00621056	0.767147	UP	AT4G30280	XTH18	Encodes a xyloglucan endotransglucosylase/hydrolase with only only the endotransglucosylase (XET; EC 2.4.1.207) activity towards xyloglucan and non-detectable endohydrolytic (XEH; EC 3.2.1.151) activity. Expressed in the mature or basal regions of both the main and lateral roots, but not in the tip of these roots where cell division occurs.
BnaA10G0011500ZS	1.01774	1.02205	0.652881	0.589924	0.00621107	0.714817	UP	AT1G02390	GPAT2	putative sn-glycerol-3-phosphate 2-O-acyltransferase
BnaA09G0625200ZS	0.459418	0.436481	0.297816	0.289352	0.00621282	0.609563	UP	AT1G15800	--	--
BnaA06G0102100ZS	0.603226	0.645587	0.356648	0.348945	0.00622361	0.82365	UP	AT1G15270	--	Translation machinery associated TMA7
BnaC01G0070400ZS	0.444104	0.46685	0.276544	0.257132	0.00622368	0.771416	UP	AT4G31800	WRKY18	Pathogen-induced transcription factor. Binds W-box sequences in vitro. Forms protein complexes with itself and with WRKY40 and WRKY60. Constitutive expression of WRKY18 enhanced resistance to P. syringae, but its coexpression with WRKY40 or WRKY60 made plants more susceptible to both P. syringae and B. cinerea. WRKY18, WRKY40, and WRKY60 have partially redundant roles in response to the hemibiotr…
BnaC04G0468500ZS	1.3984	1.41507	0.893031	0.966832	0.00623621	0.597153	UP	AT2G25810	TIP4;1	tonoplast intrinsic protein 4;1
BnaA01G0051800ZS	0.754614	0.732639	0.369409	0.420265	0.00624823	0.91332	UP	AT4G32650	KC1	Encodes KAT3, a member of the Shaker family of voltage-gated potassium channel subunits. Does not form functional potassium channel on its own. Involved in down-regulating AKT1 and KAT1 channel activity by forming heteromers with AKT1 or KAT1. The Shaker family K+ ion channels include five groups based on phylogenetic analysis (FEBS Letters (2007) 581: 2357): I (inwardly rectifying conductance): …
BnaA02G0329300ZS	0.621871	0.603713	0.356572	0.316564	0.00626541	0.8645	UP	AT2G03800	GEK1	encodes a D-aminoacyl-tRNA deacylase. Involved in detoxification of D-aminoacyl-tRNA. Mutants also show ethanol-hypersensitive phenotype.
BnaC08G0459600ZS	0.757379	0.757874	0.466289	0.415943	0.00626658	0.780329	UP	AT2G20360	--	NAD(P)-binding Rossmann-fold superfamily protein
BnaC03G0334200ZS	0.946721	0.993963	0.446913	0.371085	0.00627304	1.24639	UP	AT4G01090	--	Protein of unknown function (DUF3133)
BnaC05G0504700ZS	0.971594	0.970428	0.533665	0.598242	0.00629642	0.778804	UP	AT3G09350	Fes1A	Encodes one of the Arabidopsis orthologs of the human Hsp70-binding protein 1 (HspBP-1) and yeast Fes1p: Fes1A (AT3G09350), Fes1B (AT3G53800), Fes1C (AT5G02150). Fes1A is cytosolic and associates with cytosolic Hsp70. Mutants showed increased heat-sensitive phenotype suggestion the involvement of Fes1A in acquired thermotolerance. Does not have nucleotide exchange factor activity in vitro.
BnaA06G0039800ZS	1.23155	1.25308	0.158384	0.317215	0.00630503	2.38521	UP	AT3G17970	TOC64-III	Integral chloroplast outer membrane protein. Belongs to one of the 36 carboxylate clamp (CC)-tetratricopeptide repeat (TPR) proteins (Prasad 2010, Pubmed ID: 20856808) with potential to interact with Hsp90/Hsp70 as co-chaperones.
BnaC01G0498200ZS	1.14198	1.18713	0.159984	0.301965	0.00630679	2.33398	UP	--	--	--
BnaA09G0249100ZS	1.00763	0.950888	0.600269	0.573748	0.00631418	0.73831	UP	AT4G11410	--	NAD(P)-binding Rossmann-fold superfamily protein
BnaA08G0217800ZS	0.785399	0.846016	0.43515	0.423545	0.0063189	0.925906	UP	AT1G27770	PEA1	Encodes a chloroplast envelope Ca2+-ATPase with an N-terminal autoinhibitor.
BnaA08G0059100ZS	1.00557	1.0729	0.587883	0.608727	0.0063266	0.79657	UP	AT1G42960	CTI1	expressed protein localized to the inner membrane of the chloroplast.
BnaC09G0289600ZS	0.927771	0.879678	0.582705	0.559756	0.00636015	0.661809	UP	AT4G11850	PLDGAMMA1	Encodes a phospholipase D (gamma) that is involved in aluminum tolerance and plays a role in membrane lipid modulation under Al stress.
BnaA09G0239100ZS	0.88226	0.821861	0.445607	0.465479	0.00636721	0.903369	UP	AT4G04190	--	--
BnaC03G0000400ZS	0.435041	0.415497	0.0728203	0.121659	0.00636791	2.12876	UP	AT1G01460	PIPK11	Type I phosphatidylinositol-4-phosphate 5-kinase, subfamily A.
BnaC03G0310700ZS	0.713739	0.67151	0.37923	0.402915	0.00638339	0.824638	UP	--	--	--
BnaC02G0123300ZS	0.711772	0.668281	0.419746	0.418861	0.0063928	0.718658	UP	AT5G59840	AtRabE1b	Ras-related small GTP-binding family protein
BnaA03G0496000ZS	0.628822	0.603887	0.414655	0.391052	0.00640345	0.613506	UP	AT4G27090	RPL14B	Ribosomal protein L14
BnaA01G0389200ZS	0.52821	0.555128	0.340867	0.35637	0.00641075	0.635763	UP	AT3G06700	--	Ribosomal L29e protein family
BnaC02G0517200ZS	0.854046	0.813406	0.545352	0.564499	0.00642873	0.587279	UP	AT2G01660	PDLP6	Encodes a plasmodesmal protein that may be involved in the intercellular movement of molecules through the plasmodesmata. The protein has two DUF26 domains and a single transmembrane domain.
BnaA08G0005200ZS	0.721173	0.755448	0.479952	0.500541	0.00643236	0.590721	UP	AT1G55530	BTL06	RING/U-box superfamily protein
BnaC05G0076000ZS	1.20893	1.16033	0.775904	0.725515	0.00644463	0.658109	UP	AT1G09812	--	--
BnaC06G0187200ZS	0.786912	0.741618	0.482852	0.484221	0.00645109	0.660449	UP	AT3G53990	USP17	Adenine nucleotide alpha hydrolases-like superfamily protein
BnaA06G0013300ZS	0.821073	0.771843	0.474234	0.48764	0.00647422	0.727752	UP	AT1G53210	NCL	Encodes a Na+/Ca 2+ exchanger-like protein that participates in the maintenance of Ca 2+ homeostasis.
BnaA06G0052700ZS	0.936051	1.00135	0.548732	0.562989	0.00648952	0.801329	UP	AT1G08780	PFD4	ABI3-interacting protein 3
BnaC03G0130500ZS	0.538766	0.56452	0.206779	0.25215	0.00649162	1.26546	UP	AT5G57100	--	Nucleotide/sugar transporter family protein
BnaA01G0297200ZS	1.02934	1.02479	0.587715	0.510153	0.00653673	0.903822	UP	AT3G22930	CML11	Encodes a calmodulin-like protein.
BnaC08G0439700ZS	0.725194	0.684067	0.452606	0.450414	0.00655366	0.642109	UP	AT2G23120	--	Late embryogenesis abundant protein, group 6
BnaA10G0000700ZS	0.741269	0.763984	0.487579	0.447065	0.00656094	0.687518	UP	AT1G02140	MEE63	Encodes a homologue of the exon junction complex (EJC) component MAGO that participates in intron-mediated enhancement of gene expression.
BnaC01G0406500ZS	0.570991	0.553995	0.263974	0.305886	0.0065724	0.981228	UP
BnaA07G0128900ZS	0.648853	0.649748	0.389014	0.428241	0.00657936	0.668101	UP	AT1G21326	--	VQ motif-containing protein
BnaA07G0067500ZS	0.714856	0.75971	0.429397	0.402232	0.00658659	0.826278	UP	AT3G24530	--	AAA-type ATPase family protein / ankyrin repeat family protein
BnaA02G0012700ZS	0.64261	0.601624	0.372077	0.368305	0.00660706	0.748915	UP	AT5G03460	--	--
BnaC08G0299100ZS	0.639659	0.624657	0.267361	0.320655	0.00663527	1.10443	UP	AT3G49720	CGR2	--
BnaC09G0081200ZS	0.627225	0.578157	0.30397	0.298773	0.0066371	0.999878	UP	AT5G64170	LNK1	--
BnaA09G0222200ZS	0.724719	0.706921	0.377899	0.426162	0.00665148	0.832292	UP	AT2G02730	--	Protein of unknown function (DUF1664)
BnaA10G0013700ZS	0.491763	0.499003	0.293567	0.258329	0.006652	0.844147	UP	AT1G02750	DiL-2	Drought-responsive family protein
BnaA03G0390600ZS	0.493449	0.483647	0.285611	0.314883	0.00665203	0.702351	UP	AT2G12550	NUB1	ubiquitin-associated (UBA)/TS-N domain-containing protein
BnaC04G0493700ZS	0.676029	0.693137	0.45734	0.420908	0.00665491	0.640597	UP	AT2G29420	GSTU7	Encodes glutathione transferase belonging to the tau class of GSTs. Naming convention according to Wagner et al. (2002). Induced by Salicylic acid. Independent of NPR1 for their induction by salicylic acid.
BnaC03G0255500ZS	0.891637	0.862669	0.550901	0.501133	0.00665664	0.737719	UP	AT2G44380	--	Cysteine/Histidine-rich C1 domain family protein
BnaC01G0372500ZS	0.487918	0.515195	0.313628	0.29643	0.00666337	0.717466	UP	AT5G42300	UBL5b	ubiquitin-like protein 5
BnaC03G0179200ZS	0.656311	0.661017	0.37957	0.329895	0.00667081	0.892813	UP	AT2G31730	--	basic helix-loop-helix (bHLH) DNA-binding superfamily protein
BnaA10G0224300ZS	0.791561	0.745763	0.487336	0.490693	0.00667367	0.652473	UP	AT5G13160	PBS1	Mutant is defective in perception of Pseudomonas syringae avirulence gene avrPphB. Encodes a putative serine-threonine kinase.
BnaA03G0375300ZS	0.677889	0.715252	0.383961	0.344122	0.00667726	0.936165	UP	AT3G16030	RFO3	lectin protein kinase family protein
BnaC05G0126600ZS	0.627902	0.663562	0.428396	0.429006	0.00668381	0.590965	UP	AT1G15270	--	Translation machinery associated TMA7
BnaC06G0140200ZS	1.05509	1.00882	0.449317	0.52591	0.00668853	1.08157	UP	AT1G55460	KIN17	DNA/RNA-binding protein Kin17, conserved region
BnaC02G0286200ZS	0.655212	0.616241	0.362528	0.381544	0.006693	0.772963	UP	AT1G75280	--	isoflavone reductase, putative, identical to SP:P52577 Isoflavone reductase homolog P3 (EC 1.3.1.-) {Arabidopsis thaliana}; contains Pfam profile PF02716: isoflavone reductase. Involved in response to oxidative stress.
BnaC03G0383700ZS	0.911441	0.877159	0.381295	0.452032	0.00670308	1.10188	UP	AT3G10710	RHS12	root hair specific 12
BnaC07G0541600ZS	0.725939	0.735627	0.355919	0.412157	0.00670325	0.928194	UP	AT4G39940	APK2	adenosine-5'-phosphosulfate-kinase (akn2) mRNA, complete
BnaA03G0150900ZS	0.539879	0.499845	0.188179	0.221199	0.00670948	1.3447	UP	AT2G31350	GLX2-5	Encodes a mitochondrial glyoxalase 2 that can accommodate a number of different metal centers and with the predominant metal center being Fe(III)Zn(II).
BnaA03G0101700ZS	1.12829	1.17489	0.668194	0.596443	0.00671875	0.864906	UP	AT5G59970	--	Histone superfamily protein
BnaC03G0496800ZS	0.941634	0.88975	0.511619	0.548357	0.00672346	0.788903	UP	AT2G16710	--	Iron-sulphur cluster biosynthesis family protein
BnaC08G0499000ZS	0.837453	0.757601	0.309486	0.290592	0.00673301	1.41038	UP	AT1G13270	MAP1C	Encodes a methionine aminopeptidase formerly called MAP1B, renamed to MAP1C.
BnaA10G0250100ZS	0.576548	0.537633	0.313085	0.320637	0.00673873	0.814061	UP	AT5G09310	PEN-2	--
BnaA08G0244400ZS	0.697791	0.657989	0.354351	0.385954	0.00674971	0.872932	UP	AT1G21130	IGMT4	O-methyltransferase family protein
BnaC09G0460400ZS	0.86163	0.875361	0.438296	0.362115	0.0067617	1.11778	UP	AT5G20480	EFR	Encodes a predicted leucine-rich repeat receptor kinase (LRR-RLK). Functions as the receptor for bacterial PAMP (pathogen associated molecular patterns) EF-Tu.
BnaC03G0617600ZS	0.964778	1.02125	0.598617	0.626694	0.00680383	0.696741	UP	AT3G47380	AtPMEI11	Plant invertase/pectin methylesterase inhibitor superfamily protein
BnaA03G0087400ZS	0.667651	0.668449	0.32603	0.264129	0.00681724	1.17885	UP	AT5G20190	--	Tetratricopeptide repeat (TPR)-like superfamily protein
BnaA09G0057700ZS	0.673277	0.641414	0.364217	0.397284	0.00682032	0.787807	UP	AT5G27720	LSM4	Small nuclear ribonucleoprotein family protein
BnaC05G0250500ZS	0.584833	0.621896	0.378691	0.370113	0.00683112	0.688443	UP	AT4G01360	BPS3	Encodes a protein related to BYPASS1 (BPS1). Regulates production of mobile compound: bps signal.
BnaA01G0242000ZS	0.2818	0.298836	0.18828	0.186894	0.00684949	0.630073	UP	--	--	--
BnaA05G0062600ZS	0.666156	0.692494	0.389014	0.344122	0.00685241	0.890022	UP	AT2G39890	PROT1	Encodes a proline transporter with affinity for gly betaine, proline and GABA. Protein is expressed in the vascular tissue, specifically the phloem.
BnaA03G0238000ZS	0.738579	0.694094	0.31415	0.359126	0.00686785	1.08944	UP	AT2G24850	TAT3	Encodes a tyrosine aminotransferase that is responsive to treatment with jasmonic acid.
BnaA03G0211600ZS	0.91993	0.923326	0.426419	0.502528	0.00687152	0.988589	UP	AT2G43500	NLP8	Plant regulator RWP-RK family protein
BnaA01G0314700ZS	0.977242	1.02302	0.668525	0.632423	0.00687862	0.620626	UP	AT3G20340	--	Expression of the gene is downregulated in the presence of paraquat, an inducer of photoxidative stress.
BnaC05G0131900ZS	0.976381	1.02267	0.633191	0.587675	0.00688774	0.711411	UP	AT1G15780	NRB4	--
BnaC07G0346800ZS	0.504958	0.541499	0.196445	0.23274	0.00688972	1.28584	UP	AT5G27820	uL18m	Ribosomal L18p/L5e family protein
BnaA06G0030200ZS	0.512834	0.485708	0.298637	0.315828	0.00691919	0.700494	UP	AT1G50460	HKL1	Involved in glucose-ethylene crosstalk.
BnaA04G0168900ZS	0.65496	0.644918	0.320909	0.370862	0.00694747	0.91001	UP	AT2G25470	RLP21	receptor like protein 21
BnaC01G0203100ZS	0.838744	0.847436	0.469286	0.401476	0.00695602	0.953408	UP	AT4G26455	WIP1	Encodes an outer nuclear membrane protein that anchors RanGAP1 to the nuclear envelope. It interacts with SUN proteins and is required for maintaining the elongated nuclear shape of epidermal cells.
BnaA02G0239800ZS	0.636962	0.645169	0.333663	0.380566	0.00695668	0.844087	UP	AT1G80830	PMIT1	Thought to be involved in iron homeostasis. Induced in leaves in response to iron deficiency. Transgenic plants accumulate toxic levels of iron. Gene complements yeast iron uptake mutants.
BnaC07G0252100ZS	0.52807	0.497121	0.326824	0.319756	0.00695718	0.664993	UP	AT5G46780	--	VQ motif-containing protein
BnaA03G0047400ZS	0.611124	0.657561	0.339957	0.318234	0.00697822	0.946756	UP	AT5G11970	--	Protein of unknown function (DUF3511)
BnaA02G0097400ZS	0.580669	0.61555	0.252496	0.200738	0.00698322	1.40015	UP	AT5G60550	GRIK2	Encodes a geminivirus Rep interacting kinase (GRIK; GRIK1/AT3G45240, GRIK2/AT5G60550). GRIKs are SnRK1 (SNF1-related kinases) activating kinases. Both GRIKs specifically bind to the SnRK1 catalytic subunit and phosphorylate the equivalent threonine residue in its activation loop in vitro.
BnaA05G0416300ZS	0.95043	0.898751	0.554721	0.584632	0.00700206	0.698671	UP	AT3G13520	ATAGP12	Encodes a GPI-anchored arabinogalactan (AG) peptide with a short 'classical' backbone of 10 amino acids, seven of which are conserved among the 4 other Arabidopsis AG peptides. These peptides may be involved in cell signaling.
BnaC03G0446700ZS	0.548599	0.584934	0.327178	0.305886	0.00700673	0.840402	UP	AT3G21160	MNS2	Encodes an alpha-mannosidase I enzyme responsible for N-glycan maturation.
BnaA08G0225200ZS	0.585554	0.566843	0.269034	0.313239	0.00701419	0.984872	UP	AT1G25275	--	--
BnaC01G0245300ZS	0.507547	0.49244	0.226263	0.178434	0.0070248	1.30507	UP	AT4G15730	--	CW-type Zinc Finger
BnaA06G0384500ZS	0.769596	0.814841	0.517245	0.502405	0.00703296	0.635895	UP	AT3G27240	Cyc1-1	Cytochrome C1 family
BnaA07G0090700ZS	0.613287	0.553995	0.228777	0.21412	0.00703394	1.39811	UP	AT1G29400	ML5	A member of mei2-like gene family, predominantly plant-based family of genes encoding RNA binding proteins with characteristic presence of a highly conserved RNA binding motif first described in the mei2 gene of the fission yeast S. pombe. In silico analyses reveal nine mei2 -like genes in A. thaliana. They were grouped into four distinct clades, based on overall sequence similarity and subfamily…
BnaC01G0467800ZS	0.713739	0.720953	0.433328	0.381556	0.00703751	0.816074	UP	AT3G11230	--	Yippee family putative zinc-binding protein
BnaA09G0383600ZS	0.813061	0.923326	0.212267	0.189532	0.00704126	2.11154	UP	AT4G23190	CRK11	Encodes putative receptor-like protein kinase that is induced by the soil-borne vascular bacteria, Ralstonia solanacearum. Naming convention from Chen et al 2003 (PMID 14756307)
BnaC03G0478400ZS	0.657711	0.626542	0.380586	0.408438	0.00704895	0.70279	UP	AT2G04795	--	--
BnaA05G0400900ZS	0.91574	0.956302	0.597414	0.633314	0.00705847	0.605101	UP	AT3G15300	MVQ4	VQ motif-containing protein
BnaC09G0041500ZS	0.830164	0.793736	0.509092	0.468388	0.007065	0.732324	UP	AT5G28150	--	Plant protein of unknown function (DUF868)
BnaA01G0056600ZS	0.346441	0.352837	0.216435	0.236266	0.00706581	0.627307	UP	AT4G32060	MICU	calcium-binding EF hand family protein
BnaC05G0169700ZS	0.951652	0.981034	0.615938	0.662754	0.00706711	0.595938	UP	AT1G19950	HVA22H	HVA22-like protein H (ATHVA22H)
BnaA10G0087800ZS	0.447276	0.405363	0.180075	0.178434	0.00712905	1.24993	UP	AT5G51700	RPR2	Encodes a resistance signalling protein with two zinc binding (CHORD) domains that are highly conserved across eukaryotic phyla. Mutant has reduced RPS5 and RPM1 mediated resistance. Potentially involved in transduction of R gene mediated disease resistance. Required for R protein accumulation.
BnaA08G0140200ZS	0.634434	0.627165	0.203546	0.270062	0.00713345	1.41349	UP	AT4G33670	L-GalDH	Encodes a L-galactose dehydrogenase, involved in ascorbate biosynthesis
BnaA09G0418700ZS	0.753391	0.710251	0.383961	0.338085	0.00713385	1.0194	UP	AT1G55310	SR33	Encodes a SR spliceosome protein that is localized to nuclear specks, interacts with SR45 and the U1-70K protein of the U1 snRNP, has sequence similar to human SC35 protein. Barta et al (2010) have proposed a nomenclature for Serine/Arginine-Rich Protein Splicing Factors (SR proteins): Plant Cell. 2010, 22:2926.
BnaA06G0060400ZS	0.522475	0.503632	0.303289	0.330755	0.00714053	0.694527	UP	AT1G09800	TRUA6	Pseudouridine synthase family protein
BnaC03G0638600ZS	0.615775	0.607451	0.39596	0.356867	0.00714244	0.700299	UP	AT1G27420	--	Galactose oxidase/kelch repeat superfamily protein
BnaC03G0175700ZS	0.549843	0.512959	0.309042	0.314883	0.00716259	0.768428	UP	AT1G06135	SCREW1	--
BnaC02G0050700ZS	0.701808	0.702641	0.431539	0.474007	0.00717074	0.633143	UP	AT5G12170	CLT3	Encodes one of the CRT-Like transporters (CLT1/AT5G19380, CLT2/AT4G24460, CLT3/AT5G12170). Required for glutathione homeostasis and stress responses. Mutants lacking these transporters are heavy metal-sensitive, glutathione(GSH)-deficient, and hypersensitive to Phytophthora infection.
BnaC06G0152000ZS	0.704675	0.668858	0.324011	0.3695	0.00717107	0.985902	UP	AT5G36220	CYP91A1	member of CYP81D family of cytochrome p450s. This gene was originally called CYP91A1, but was later renamed to CYP81D1.
BnaC09G0598700ZS	0.827253	0.771315	0.42724	0.391264	0.00719094	0.965717	UP	AT5G04840	--	bZIP protein
BnaA05G0349600ZS	0.73204	0.687968	0.436572	0.416744	0.00719387	0.734747	UP	AT3G20790	--	NAD(P)-binding Rossmann-fold superfamily protein
BnaC09G0546400ZS	0.951652	0.87473	0.387161	0.332256	0.00721014	1.34409	UP	AT5G11030	ALF4	alf4-1 prevents initiation of lateral roots. Cannot be rescued by IAA. Protein belongs to a plant-specific gene family and is localized to the nucleus.
BnaC09G0006400ZS	0.634434	0.619048	0.346465	0.296673	0.00721216	0.962741	UP	AT4G01960	--	--
BnaC03G0554000ZS	0.815701	0.846382	0.490237	0.535301	0.00725538	0.696612	UP	AT5G62470	MYBCOV1	Encodes a R2R3 type Myb transcription factor whose expression is strongly induced by abscisic acid. Mediates abscisic acid signaling during drought stress response.
BnaA06G0294000ZS	1.0591	1.01211	0.685405	0.642361	0.00726709	0.641468	UP	AT5G64360	SDJ1	Chaperone DnaJ-domain superfamily protein
BnaC03G0692700ZS	1.48208	1.48835	0.938573	1.02472	0.00727503	0.597395	UP	AT4G36680	RPPR7	Tetratricopeptide repeat (TPR)-like superfamily protein
BnaC02G0354300ZS	0.546693	0.540146	0.348032	0.312004	0.00728077	0.719521	UP	AT4G12560	CPR30	Encodes CPR1 (Constitutive Expresser of PR Genes 1, also known as CPR30), a F-Box protein that functions as a negative regulator of defense response and targets resistance proteins.
BnaC08G0324000ZS	0.632747	0.593567	0.380122	0.385417	0.00728212	0.679781	UP	AT3G52230	--	--
BnaC02G0451100ZS	0.709783	0.673387	0.409787	0.437874	0.00728949	0.706418	UP	AT3G26210	CYP71B23	putative cytochrome P450
BnaA01G0135000ZS	0.355997	0.380688	0.219857	0.224826	0.00735766	0.728267	UP	AT4G23910	UIEF2	--
BnaA03G0389200ZS	0.725462	0.732907	0.463496	0.505092	0.00736167	0.5904	UP	AT2G06850	XTH4	endoxyloglucan transferase (EXGT-A1) gene
BnaA03G0516400ZS	0.867623	0.934474	0.514175	0.513263	0.00736638	0.810627	UP	AT4G30210	ATR2	Encodes NADPH-cytochrome P450 reductase that catalyzes the first oxidative step of the phenylpropanoid general pathway.
BnaC04G0369100ZS	0.672448	0.62471	0.372231	0.372225	0.00737751	0.801097	UP	AT5G35580	PBL13	Protein kinase superfamily protein
BnaA09G0433600ZS	0.875519	0.878751	0.492751	0.42011	0.00738538	0.942405	UP	AT1G24575	--	--
BnaC07G0549300ZS	0.662313	0.721652	0.341135	0.350379	0.00743779	1.00098	UP	AT4G38420	sks9	SKU5 similar 9
BnaA09G0057800ZS	0.536829	0.553995	0.321359	0.282801	0.00743781	0.852417	UP	AT5G27820	uL18m	Ribosomal L18p/L5e family protein
BnaC07G0433200ZS	0.78313	0.718142	0.376358	0.364711	0.00745854	1.01851	UP	AT4G20320	CTPS4	CTP synthase family protein
BnaA09G0713100ZS	0.913585	1.02225	0.301684	0.333076	0.00747337	1.60868	UP	AT1G02380	--	--
BnaC05G0492600ZS	0.713739	0.690776	0.437101	0.473427	0.00748377	0.625296	UP	AT5G05300	IDL6	--
BnaA10G0195700ZS	0.854985	0.862073	0.516257	0.570646	0.00749088	0.659715	UP	AT5G17330	GAD1	Encodes one of two isoforms of glutamate decarboxylase.
BnaC08G0190200ZS	0.602713	0.637934	0.398124	0.411144	0.00749239	0.616403	UP	AT1G09020	SNF4	putative activator subunit of SNF1-related protein kinase
BnaC01G0376700ZS	0.676475	0.716049	0.385091	0.417796	0.00749581	0.794433	UP	AT3G21865	PEX22	Interacts with PEX4 in a yeast two-hybrid. The PEX4 and PEX22 pair may be important during the remodeling of peroxisome matrix contents as glyoxysomes transition to leaf peroxisomes.
BnaC02G0418300ZS	0.310321	0.355125	0.0639936	0.0455575	0.00751048	2.60272	UP	AT5G47500	PME5	predicted to encode a pectin methylesterase
BnaA10G0013200ZS	1.00552	1.03651	0.704666	0.653776	0.00751162	0.588048	UP	AT5G38700	--	--
BnaC07G0451800ZS	0.536806	0.563169	0.338956	0.309763	0.00751286	0.761803	UP	AT4G23570	SGT1A	Closely related to SGT1B, may function in SCF(TIR1) mediated protein degradation. AtSGT1a and AtSGT1b are functionally redundant in the resistance to pathogenes. AtSGT1b was more highly expressed than AtSGT1. The N-terminal TPR domain of AtSGT1a reduces the steady-state level of Arabidopsis SGT1 proteins whereas the same domain from AtSGT1b enhances SGT1 accumulation. The TPR domain is dispensabl…
BnaA06G0289200ZS	0.840994	0.766164	0.337886	0.36324	0.00751876	1.19677	UP	AT5G63830	--	HIT-type Zinc finger family protein
BnaA05G0026700ZS	1.07206	1.13683	0.722628	0.699761	0.00754052	0.635011	UP	AT2G41730	HRG1	--
BnaC05G0146900ZS	0.908395	0.952638	0.546152	0.489041	0.00756589	0.846204	UP	AT1G17350	--	NADH:ubiquinone oxidoreductase intermediate-associated protein 30
BnaC02G0483200ZS	0.598996	0.641593	0.377775	0.376575	0.00759342	0.717717	UP	AT5G48150	PAT1	Member of GRAS gene family. Semi-dominant mutant has a reduced response to far-red light and appears to act early in the phytochrome A signaling pathway.
BnaA02G0146000ZS	0.620008	0.568882	0.300234	0.287356	0.0076006	1.01673	UP	AT5G52300	RD29B	--
BnaC05G0152600ZS	0.784161	0.80694	0.506829	0.45658	0.00763716	0.723804	UP	AT1G18190	GC2	This gene is predicted to encode a protein that functions as a Golgi apparatus structural component known as a golgin in mammals and yeast. A fluorescently-tagged version of GC2 co-localizes with Golgi markers, and this localization appears to be replicated using the C-terminal (508锟?68 aa) portion of the protein.
BnaA04G0280800ZS	1.13009	1.05068	0.422358	0.324425	0.00764185	1.54608	UP	AT2G44210	--	Protein of Unknown Function (DUF239)
BnaC04G0360500ZS	0.468425	0.440392	0.282135	0.29132	0.00764903	0.664308	UP	AT3G24100	BIA	Uncharacterised protein family SERF
BnaA03G0478200ZS	0.573598	0.603881	0.372886	0.346183	0.00766813	0.711501	UP	AT4G24160	--	Encodes a soluble lysophosphatidic acid acyltransferase with additional triacylglycerol lipase and phosphatidylcholine hydrolyzing enzymatic activities. Plays a pivotal role in maintaining the lipid homeostasis by regulating both phospholipid and neutral lipid levels.
BnaC02G0030800ZS	0.69964	0.697659	0.430945	0.474264	0.00767643	0.626318	UP	AT5G08180	--	Ribosomal protein L7Ae/L30e/S12e/Gadd45 family protein
BnaC04G0543300ZS	0.957752	1.01396	0.638448	0.658029	0.00768057	0.604852	UP	AT2G35780	scpl26	serine carboxypeptidase-like 26
BnaC08G0373700ZS	0.728425	0.793376	0.366863	0.334865	0.0077054	1.1168	UP	AT3G57450	--	--
BnaC02G0008200ZS	0.721173	0.656732	0.31568	0.325004	0.00771067	1.10479	UP	AT5G03320	PCRK2	Protein kinase superfamily protein
BnaC03G0563400ZS	0.643893	0.685263	0.359993	0.320303	0.00771652	0.966276	UP	AT3G49530	NTL6	Transcription factor that serves as a molecular link between cold signals and pathogen resistance responses. Undergoes proteolytic processing triggered by cold-induced changes in membrane fluidity.
BnaC02G0276500ZS	1.6314	1.38499	0.105589	0.118956	0.00772272	3.74775	UP	AT1G73410	MYB54	Encodes a putative transcription factor that is a member of the R2R3-MYB family.
BnaC04G0023000ZS	1.18956	1.25908	0.809519	0.77862	0.00772517	0.624647	UP	AT2G40980	--	Protein kinase superfamily protein
BnaA09G0540800ZS	0.937845	0.99753	0.361513	0.441864	0.00772777	1.26847	UP	AT3G59350	MAZ	Protein kinase superfamily protein
BnaC06G0047100ZS	0.647933	0.61555	0.351965	0.385417	0.00774082	0.776924	UP	AT3G19950	BTL08	RING/U-box superfamily protein
BnaC02G0010300ZS	0.397047	0.410367	0.227563	0.253261	0.00776332	0.747799	UP	AT5G03430	--	phosphoadenosine phosphosulfate (PAPS) reductase family protein
BnaC08G0486200ZS	0.439874	0.442101	0.260818	0.22583	0.00777323	0.857858	UP	AT1G15120	--	Ubiquinol-cytochrome C reductase hinge protein
Bnascaffold0027G0008900ZS	1.01463	1.06429	0.676665	0.629384	0.00777968	0.670625	UP	AT5G45480	--	Protein of unknown function (DUF594)
BnaC02G0444000ZS	0.712886	0.678736	0.351965	0.397603	0.00778965	0.892637	UP	AT2G03800	GEK1	encodes a D-aminoacyl-tRNA deacylase. Involved in detoxification of D-aminoacyl-tRNA. Mutants also show ethanol-hypersensitive phenotype.
BnaA02G0291900ZS	0.698553	0.746315	0.39307	0.422123	0.00779049	0.825724	UP	AT5G45250	RPS4	RPS4 belongs to the Toll/interleukin-1 receptor (TIR)-nucleotide binding site (NBS)-Leu-rich repeat (LRR) class of disease resistance (R ) genes. Confers specific resistance to Pseudomonas syringae pv. tomato carrying the avirulence gene AvrRPS4. Produces alternative transcripts with truncated open reading frames.
BnaC05G0096400ZS	0.86706	0.883867	0.460262	0.526072	0.0077994	0.827972	UP	AT1G13195	--	RING/U-box superfamily protein
BnaC01G0070600ZS	0.627346	0.583657	0.311353	0.335875	0.00780486	0.903854	UP	AT4G31780	UGT81A1	Encodes an A-type monogalactosyldiacylglycerol (MGDG) synthase. It represents the isoform responsible for the bulk of MGDG synthesis in Arabidopsis.
BnaA07G0017000ZS	0.717431	0.73974	0.316768	0.380532	0.0078111	1.06332	UP	AT2G18730	DGK3	diacylglycerol kinase 3
BnaA02G0168900ZS	0.850019	0.90867	0.481018	0.515101	0.00782039	0.820109	UP	--	--	--
BnaA03G0076100ZS	0.657853	0.695492	0.433759	0.408182	0.0078255	0.684739	UP	AT5G18110	NCBP	novel cap-binding protein
BnaA09G0101500ZS	0.584571	0.637506	0.268875	0.232632	0.00783367	1.28499	UP	AT5G66210	CPK28	member of Calcium Dependent Protein Kinase
BnaA02G0332000ZS	1.02274	1.04297	0.583638	0.654498	0.00783617	0.738471	UP	AT3G25610	ALA10	ATPase E1-E2 type family protein / haloacid dehalogenase-like hydrolase family protein
BnaA10G0001800ZS	1.38422	1.2311	0.444587	0.45078	0.00784517	1.54644	UP	AT1G01840	--	--
BnaA06G0366600ZS	0.813731	0.908747	0.326085	0.329895	0.00785649	1.39276	UP	AT5G47960	SMG1	Encodes a small molecular weight g-protein.
BnaC05G0060600ZS	0.650525	0.679852	0.42754	0.454683	0.00785726	0.59262	UP	AT1G08200	AXS2	Encodes a putative UDP-D-apiose/UPD-D-xylose synthetase.
BnaA03G0040800ZS	0.498233	0.456617	0.242949	0.233586	0.00785938	1.00269	UP	AT5G10490	MSL2	A member of MscS-like gene family, structurally very similar to MSL3, comprising of an N-terminal chloroplast transit peptide, five trans-membrane helices and a C-terminal cytoplasmic domain. Mutant plants showed abnormalities in the size and shape of plastids. MSL2-GFP was localized to discrete foci on the plastid envelope and co-localize with the plastid division protein AtMinE.
BnaA10G0160400ZS	0.951652	1.01566	0.309486	0.401476	0.00786299	1.46838	UP	AT5G60800	HIPP3	Heavy metal transport/detoxification superfamily protein
BnaC06G0278800ZS	0.795238	0.763519	0.514328	0.474611	0.00786306	0.656444	UP	AT1G74310	HSP101	Encodes ClpB1, which belongs to the Casein lytic proteinase/heat shock protein 100 (Clp/Hsp100) family. Involved in refolding of proteins which form aggregates under heat stress. Also known as AtHsp101. AtHsp101 is a cytosolic heat shock protein required for acclimation to high temperature.
BnaA07G0176300ZS	0.73844	0.819581	0.270518	0.303913	0.00786439	1.43951	UP	AT5G41080	GDPD2	Encodes a member of the glycerophosphodiester phosphodiesterase (GDPD) family.
BnaC05G0224600ZS	0.86611	0.951649	0.431606	0.4265	0.00787929	1.08293	UP	AT1G25580	SOG1	Encodes suppressor of gamma response 1 (SOG1), a putative transcription factor governing multiple responses to DNA damage.
BnaC05G0512000ZS	0.940322	0.913904	0.629475	0.578125	0.00788135	0.618674	UP	AT3G07910	--	--
BnaA08G0244800ZS	0.951652	0.938714	0.307969	0.41177	0.00789035	1.39312	UP	AT1G21050	--	Protein of unknown function, DUF617
BnaA06G0085600ZS	0.64963	0.690408	0.228301	0.2895	0.00790449	1.37181	UP	AT1G11960	OSCA1.3	ERD (early-responsive to dehydration stress) family protein
BnaA06G0319000ZS	0.991051	0.998102	0.578228	0.496759	0.00790667	0.887835	UP	AT2G17290	CPK6	Encodes calcium dependent protein kinase 6 (CPK6), a member of the Arabidopsis CDPK gene family. CDPKs contain an intrinsic Ca2+-activation domain with four EF hand Ca2+-binding sites. CDPKs protein kinases have been proposed to function in multiple plant signal transduction pathways downstream of [Ca2+]cyt elevations, thus transducing various physiological responses. CPK6 is expressed in both gu…
BnaC06G0343100ZS	1.16997	1.18464	0.810337	0.739893	0.00790745	0.60301	UP	AT1G67930	COG5	Golgi transport complex protein-related
BnaA09G0593600ZS	0.917664	0.894769	0.514054	0.440836	0.00790782	0.924522	UP	AT2G22300	SR1	Encodes a putative CAM binding transcription factor. Loss of function mutations show enhanced resistance to fungal and bacterial pathogens suggesting that CAMTA functions to suppress defense responses.
BnaC02G0267900ZS	0.738814	0.691273	0.413491	0.382526	0.00791161	0.845232	UP	AT1G72520	LOX4	PLAT/LH2 domain-containing lipoxygenase family protein
BnaC07G0009500ZS	0.529509	0.554998	0.345499	0.317683	0.00792344	0.709563	UP	AT2G20370	RSA3	Encodes a xyloglucan galactosyltransferase located in the membrane of Golgi stacks that is involved in the biosynthesis of fucose. It is also involved in endomembrane organization. It is suggested that it is a dual-function protein that is responsible for actin organization and the synthesis of cell wall materials.
BnaC02G0498700ZS	0.782469	0.735884	0.422358	0.37786	0.00795169	0.924043	UP	AT5G27610	ATALY1	DIRP ;Myb-like DNA-binding domain
BnaC07G0039900ZS	0.352464	0.341229	0.218065	0.195501	0.00799948	0.746178	UP	--	--	--
BnaA07G0251700ZS	0.679751	0.732293	0.327691	0.277564	0.00800449	1.22217	UP	AT1G74458	--	--
BnaA06G0285800ZS	0.92497	0.933096	0.527947	0.448962	0.00802239	0.927505	UP	AT5G63450	CYP94B1	member of CYP94B
BnaC01G0176100ZS	0.758792	0.804482	0.484298	0.45078	0.00803881	0.741412	UP	AT4G24160	--	Encodes a soluble lysophosphatidic acid acyltransferase with additional triacylglycerol lipase and phosphatidylcholine hydrolyzing enzymatic activities. Plays a pivotal role in maintaining the lipid homeostasis by regulating both phospholipid and neutral lipid levels.
BnaA02G0166700ZS	0.656179	0.697624	0.42843	0.442145	0.00806285	0.636978	UP	AT1G65030	--	This gene is predicted to encode a protein with a DWD motif. It can bind to DDB1a in Y2H assays, and DDB1b in co-IP assays, and may be involved in the formation of a CUL4-based E3 ubiquitin ligase
BnaC01G0485400ZS	0.489344	0.465066	0.190742	0.232179	0.00806619	1.17422	UP	AT3G05890	RCI2B	Low temperature and salt responsive protein family
BnaA02G0011300ZS	0.819712	0.739139	0.320872	0.334563	0.00808482	1.24996	UP	AT5G03200	LUL1	Paralog of LOG2 (At3g09770), a ubiquitin ligase that regulates amino acid export.
BnaC08G0271200ZS	0.603826	0.537345	0.17841	0.198011	0.00811409	1.6001	UP	AT1G22070	TGA3	Encodes a transcription factor. Like other TGAla-related factors, TGA3 has a highly conserved bZIP region and exhibits similar DNA-binding properties.
BnaC08G0487100ZS	0.971478	0.885639	0.214758	0.301107	0.00814007	1.848	UP	AT1G14990	--	--
BnaC05G0037000ZS	0.496062	0.526079	0.285853	0.310351	0.00817319	0.777715	UP	AT2G32210	AthCYSTM6	--
BnaA05G0496200ZS	0.59705	0.650169	0.328758	0.314219	0.00820515	0.955876	UP	AT3G10020	HUP26	--
BnaC05G0147900ZS	0.725068	0.692494	0.378528	0.424201	0.00822253	0.820427	UP	AT1G17490	--	--
BnaA08G0197600ZS	0.561089	0.550344	0.34331	0.302133	0.00823701	0.78406	UP	AT4G39100	SHL	Putative transcription factor containing a PHD finger and BAH motif, required for normal development
BnaA05G0012600ZS	0.891678	0.953777	0.483656	0.527855	0.00825059	0.867465	UP	AT2G46650	CYTB5-C	member of Cytochromes b5
BnaC05G0218400ZS	0.908395	0.96347	0.457554	0.380659	0.0082695	1.15909	UP	AT1G26840	ORC6	Origin Recognition Complex subunit 6. Involved in the initiation of DNA replication. Regulated transcriptionally during cell cycle, peaking at G1/S-phase. Target of E2F/DF family of transcription factors.
BnaA02G0156400ZS	0.78281	0.842332	0.431281	0.387632	0.00827769	0.988785	UP	AT1G65410	TGD3	Encodes a member of NAP subfamily of transporters. Mutations in this gene suppress the low temperature-induced phenotype of Arabidopsis tocopherol-deficient mutant vte2.
BnaC02G0535300ZS	0.671371	0.639353	0.418304	0.444037	0.00828834	0.604035	UP	AT5G63370	CDKG1	Protein kinase superfamily protein
BnaC02G0309000ZS	0.870742	0.826498	0.578924	0.55142	0.0083398	0.586428	UP	AT1G78000	SULTR1;2	Encodes a sulfate transporter that can restore sulfate uptake capacity of a yeast mutant lacking sulfate transporter genes.
BnaC09G0471900ZS	0.793043	0.857374	0.32489	0.249807	0.00834259	1.52196	UP	AT5G19190	--	--
BnaC01G0147900ZS	0.688429	0.66364	0.39596	0.345574	0.00835346	0.866583	UP	AT4G21940	CPK15	member of Calcium Dependent Protein Kinase
BnaC05G0144200ZS	2.37913	2.15443	0.527947	0.267651	0.00835688	2.51053	UP	AT1G17140	RIP1	Encodes a ROP/RAC effector, designated interactor of constitutive active ROPs 1 (ICR1), that interacts with GTP-bound ROPs. ICR1 is a scaffold mediating formation of protein complexes that are required for cell polarity. ICR1 is comprised of coiled-coil domains and forms complexes with itself and the exocyst vesicle-tethering complex subunit SEC3.
BnaA01G0083100ZS	0.809348	0.832008	0.494378	0.432359	0.00842957	0.824657	UP	AT4G28730	GrxC5	Encodes a glutaredoxin GrxC5. GrxC5 exists as two forms when expressed in Escherichia coli. The monomeric apoprotein possesses deglutathionylation activity mediating the recycling of plastidial methionine sulfoxide reductase B1 and peroxiredoxin IIE, whereas the dimeric holoprotein incorporates a [2Fe-2S] cluster.
BnaC01G0488400ZS	0.793043	0.750836	0.463861	0.497312	0.00843398	0.683692	UP	AT3G06610	SUF1	DNA-binding enhancer protein-related
BnaA03G0503100ZS	0.976053	1.04923	0.605841	0.57991	0.00844419	0.772326	UP	AT4G28210	EMB1923	embryo defective 1923
BnaC05G0141800ZS	0.622234	0.585524	0.32489	0.356867	0.00845801	0.824999	UP	AT1G16930	--	F-box/RNI-like/FBD-like domains-containing protein
BnaA06G0308800ZS	0.713238	0.750722	0.412779	0.453487	0.00846306	0.756994	UP	AT5G67590	NDUFS4	Mutant leaves have a reduced capacity for cold acclimation, appear water-soaked, leak electrolytes, and accumulate reactive oxygen species constitutively. Encode a protein with high similarity to the 18-kD Fe-S subunit of complex I (NADH dehydrogenase, EC 1.6.5.3) in the mitochondrial electron transfer chain.
BnaA09G0597400ZS	0.487389	0.480874	0.267486	0.223601	0.008534	0.979421	UP	AT2G21630	AtSEC23C	Sec23/Sec24 protein transport family protein
BnaC02G0506500ZS	0.552572	0.519786	0.322993	0.296545	0.00854316	0.791522	UP	AT5G25940	--	early nodulin-related
BnaC04G0285600ZS	0.205886	0.227726	0.0866255	0.0951155	0.00854419	1.25452	UP	AT1G14800	--	Nucleic acid-binding, OB-fold-like protein
BnaA02G0190400ZS	0.500399	0.513851	0.0815918	0.152943	0.00856045	2.11254	UP	AT1G70740	--	Protein kinase superfamily protein
BnaA08G0310100ZS	0.511777	0.486315	0.253415	0.287548	0.00856659	0.883644	UP	AT1G05710	--	basic helix-loop-helix (bHLH) DNA-binding superfamily protein
BnaC01G0403600ZS	1.03977	0.973689	0.321359	0.419844	0.0085782	1.44173	UP	AT3G18580	SSB2	Nucleic acid-binding, OB-fold-like protein
BnaC03G0677400ZS	0.685688	0.758014	0.331603	0.335562	0.00858904	1.11366	UP	AT1G36622	--	--
BnaC01G0149300ZS	0.54659	0.575187	0.259499	0.205199	0.00861089	1.27142	UP	AT4G22070	WRKY31	member of WRKY Transcription Factor; Group II-b
BnaA09G0080500ZS	0.899387	0.883951	0.41377	0.494124	0.00862284	0.973985	UP	AT5G62890	--	Xanthine/uracil permease family protein
BnaA07G0165700ZS	0.783713	0.756824	0.46011	0.40275	0.00862569	0.836234	UP	AT5G59410	--	Rab5-interacting family protein
BnaA03G0300600ZS	0.66306	0.714135	0.41665	0.412698	0.00863034	0.731684	UP	AT3G05880	RCI2A	Induced by low temperatures, dehydration and salt stress and ABA. Encodes a small (54 amino acids), highly hydrophobic protein that bears two potential transmembrane domains.
BnaA08G0020800ZS	0.527487	0.540244	0.320909	0.355267	0.00864769	0.659077	UP	AT1G51690	B ALPHA	55 kDa B regulatory subunit of phosphatase 2A mRNA,
BnaA09G0043300ZS	0.532925	0.500787	0.32489	0.338085	0.00866727	0.640807	UP	AT3G29000	--	Calcium-binding EF-hand family protein
BnaA03G0582400ZS	1.24003	1.17191	0.688627	0.749422	0.00867467	0.746085	UP	AT1G61580	RPL3B	R-protein L3 B
BnaA09G0228100ZS	0.934766	0.952731	0.584643	0.643767	0.00867604	0.619682	UP	AT3G25780	AOC3	Encodes allene oxide cyclase, one of the enzymes involved in jasmonic acid biosynthesis. One of four genes in Arabidopsis that encode this enzyme. mRNA expression is upregulated in senescing leaves. Note: Nomenclature for Arabidopsis allene oxide cyclase 3 (AOC3, AT3G25780) gene is based on Stenzel et al. 2003 Plant Molecular Biology 51:895-911. AOC3 (AT3G25780) is also referred to as AOC2 in He …
BnaC08G0159700ZS	0.652561	0.62365	0.414816	0.380141	0.00868564	0.682918	UP	AT4G24290	MACP2	MAC/Perforin domain-containing protein
BnaA02G0139700ZS	0.688117	0.65634	0.33344	0.383163	0.00871807	0.907778	UP	AT5G53340	HPGT1	Galactosyltransferase family protein
BnaC05G0085700ZS	0.85206	0.877159	0.527947	0.462963	0.00878559	0.803295	UP	AT1G10650	--	SBP (S-ribonuclease binding protein) family protein
BnaC03G0485000ZS	0.604863	0.600935	0.281091	0.21412	0.00879566	1.28387	UP	AT2G13790	SERK4	somatic embryogenesis receptor-like kinase 4
BnaA05G0423300ZS	0.673993	0.67783	0.354956	0.410291	0.00882372	0.82091	UP	AT3G12740	ALIS1	Physically interacts with ALA3, and is required for the phospholipid translocase activity of ALA3.
BnaC03G0421800ZS	0.652058	0.618094	0.375827	0.335018	0.00889094	0.837394	UP	AT3G17300	EMB2786	--
BnaC07G0293300ZS	0.966521	1.04553	0.582095	0.59198	0.00890854	0.777142	UP	AT3G25920	RPL15	encodes a plastid ribosomal protein CL15, a constituent of the large subunit of the ribosomal complex
BnaC02G0243600ZS	0.413762	0.42473	0.210761	0.168488	0.00892279	1.14465	UP	AT1G69840	AtHIR1	SPFH/Band 7/PHB domain-containing membrane-associated protein family
BnaC08G0349200ZS	1.48035	1.61582	0.745337	0.802952	0.00892462	0.999809	UP	AT3G54890	LHCA1	Encodes a component of the light harvesting complex associated with photosystem I.
BnaA03G0410400ZS	0.692869	0.75726	0.336322	0.366448	0.00892707	1.04506	UP	AT5G61500	ATG3	autophagy 3 (APG3)
BnaA08G0213400ZS	0.760552	0.708289	0.460975	0.453826	0.00894311	0.683149	UP	AT1G28380	NSL1	This gene is predicted to encode a protein involved in negatively regulating salicylic acid-related defense responses and cell death programs. nsl1 mutants develop necrotic lesions spontaneously and show other features of a defense response, such as higher levels of SA and disease resistance-related transcripts, in the absence of a biotic stimulus. The NSL1 protein is predicted to have a MACPF do…
BnaA08G0285900ZS	0.608	0.569173	0.295292	0.249134	0.00896484	1.11252	UP	AT1G11080	scpl31	serine carboxypeptidase-like 31
BnaA01G0381900ZS	0.673119	0.715756	0.450515	0.426794	0.00897433	0.662761	UP	AT3G10050	OMR1	first enzyme in the biosynthetic pathway of isoleucine
BnaA07G0111900ZS	0.667095	0.673229	0.409966	0.355453	0.0089826	0.808259	UP	AT1G27130	GSTU13	Encodes glutathione transferase belonging to the tau class of GSTs. Naming convention according to Wagner et al. (2002).
BnaC06G0201100ZS	0.951652	0.923326	0.32489	0.428241	0.00900158	1.3159	UP	AT3G56810	--	--
BnaA07G0384000ZS	0.510887	0.553995	0.258993	0.284037	0.00900408	0.971589	UP	AT1G79660	--	--
BnaA07G0286000ZS	0.815501	0.763983	0.49505	0.466139	0.00900617	0.716561	UP	AT1G66260	IRP8	RNA-binding (RRM/RBD/RNP motifs) family protein
BnaA07G0087900ZS	0.570991	0.547156	0.305036	0.343142	0.00902267	0.786648	UP	AT1G29740	RKFL3	Leucine-rich repeat transmembrane protein kinase
Bnascaffold0025G0040400ZS	1.05739	1.00856	0.621114	0.67617	0.00904237	0.671308	UP	AT1G06137	SCREW3	--
BnaC08G0326300ZS	0.512428	0.560591	0.211179	0.164708	0.00909111	1.5133	UP	AT3G52460	--	hydroxyproline-rich glycoprotein family protein
BnaC03G0419700ZS	0.819835	0.893217	0.476476	0.47117	0.0091137	0.85415	UP	AT3G16990	--	Haem oxygenase-like, multi-helical
BnaA10G0246600ZS	0.791132	0.79597	0.380924	0.453165	0.00911875	0.928122	UP	AT5G09880	--	Splicing factor, CC1-like
BnaA01G0101800ZS	0.582078	0.562789	0.277867	0.326199	0.0091328	0.922402	UP	AT4G19350	NNF1	embryo defective 3006
BnaC09G0102900ZS	0.641387	0.600537	0.333864	0.29068	0.00914364	0.991703	UP	AT5G66030	GRIP	Involved in golgi protein trafficking. AtARL1 binds directly to the GRIP domain of AtGRIP in a GTP-dependent manner. Localized to the golgi apparatus, tyrosine 717 in AtGRIP is crucial for Golgi localization.
BnaA04G0253700ZS	0.595389	0.581119	0.38847	0.348632	0.00914743	0.674574	UP	AT2G39770	VTC1	Encodes a GDP-mannose pyrophosphorylase/ mannose-1-pyrophosphatase. This enzyme provides GDP-mannose, which is used for cell wall carbohydrate biosynthesis and protein glycosylation as well as for ascorbate (vitamin C) biosynthesis. Mutations in this gene confer hypersensitivity to NH4+.
BnaA07G0006500ZS	0.805525	0.752214	0.434372	0.468134	0.0091476	0.787444	UP	AT2G20010	--	Protein of unknown function (DUF810)
BnaA09G0388700ZS	0.492896	0.460008	0.260591	0.282565	0.00918992	0.810962	UP	AT1G32920	--	--
BnaC02G0206400ZS	1.21968	1.14403	0.745706	0.699279	0.00920406	0.71	UP	AT3G44840	--	S-adenosyl-L-methionine-dependent methyltransferases superfamily protein
BnaA03G0464300ZS	0.209187	0.190528	0.0921812	0.0806831	0.00920592	1.20933	UP	AT3G30739	--	--
BnaC04G0184600ZS	0.726177	0.760572	0.449207	0.397815	0.00921527	0.81169	UP	AT2G29500	HSP17.6B	HSP20-like chaperones superfamily protein
BnaC03G0156700ZS	1.15558	1.27845	0.517173	0.444401	0.00927553	1.33988	UP	AT5G52300	RD29B	encodes a protein that is induced in expression in response to water deprivation such as cold, high-salt, and dessication. The response appears to be via abscisic acid. The promoter region contains two ABA-responsive elements (ABREs) that are required for the dehydration-responsive expression of rd29B as cis-acting elements. Protein is a member of a gene family with other members found plants, an…
BnaC01G0046300ZS	0.458485	0.409928	0.178348	0.184905	0.00927701	1.2574	UP	AT4G34140	--	D111/G-patch domain-containing protein
BnaC08G0390100ZS	0.794678	0.790746	0.391409	0.305254	0.0092856	1.18633	UP	AT3G59660	BAGP1	C2 domain-containing protein / GRAM domain-containing protein
BnaC05G0531900ZS	0.386897	0.356876	0.187145	0.203734	0.00931526	0.928138	UP	AT3G05880	RCI2A	Induced by low temperatures, dehydration and salt stress and ABA. Encodes a small (54 amino acids), highly hydrophobic protein that bears two potential transmembrane domains.
BnaA07G0314500ZS	1.42748	1.58284	0.703929	0.669126	0.00932467	1.13253	UP
BnaA07G0356600ZS	0.756825	0.683684	0.331261	0.345128	0.00935858	1.09065	UP	AT1G76020	--	Thioredoxin superfamily protein
BnaC06G0400500ZS	0.658836	0.718142	0.372668	0.384319	0.00937004	0.863165	UP	AT1G73710	--	Pentatricopeptide repeat (PPR) superfamily protein
BnaA06G0092100ZS	0.557064	0.626542	0.186334	0.139644	0.00939278	1.86034	UP	AT1G14230	--	GDA1/CD39 nucleoside phosphatase family protein
BnaC08G0211100ZS	0.613051	0.670436	0.348784	0.339842	0.00939786	0.898277	UP	AT1G11670	--	MATE efflux family protein
BnaA07G0305800ZS	0.397047	0.415497	0.255974	0.276284	0.00944822	0.610317	UP	AT1G68920	CIL1	basic helix-loop-helix (bHLH) DNA-binding superfamily protein
BnaA03G0381500ZS	0.604827	0.595202	0.343422	0.388301	0.00947031	0.7137	UP	AT3G24800	PRT1	Contains two ring finger domains and one ZZ domain. Week similarity to yeast Rad18p. Putative component of the N-end rule pathway (ubiquitin-dependent proteolysis).
BnaA10G0003000ZS	0.808716	0.830487	0.521853	0.46134	0.00947401	0.737447	UP	AT1G01720	ATAF1	Belongs to a large family of putative transcriptional activators with NAC domain. Transcript level increases in response to wounding and abscisic acid. ATAF1 attentuates ABA signaling and sythesis. Mutants are hyposensitive to ABA.
BnaA02G0141400ZS	0.546782	0.582755	0.347042	0.319302	0.00948142	0.761391	UP	AT5G53120	SPMS	encodes a novel spermine synthase and is a paralog of previously characterized spermidine synthases, SPDS1 and SPDS2. SPDS3 forms heterodimers with SDPS2, which in turn forms heterodimers with SDPS1 in vivo. The gene does not complement speDelta3 deficiency of spermidine synthase in yeast but DOES complement speDelta4 deficiency.
BnaC03G0036800ZS	0.936302	0.84946	0.415545	0.369844	0.00948635	1.18506	UP	AT5G08040	TOM5	mitochondrial import receptor subunit TOM5 homolog
BnaC05G0016600ZS	0.530892	0.49989	0.307349	0.276284	0.00949661	0.820603	UP	AT1G02880	TPK1	Encodes a thiamine pyrophosphokinase capable of producing thiamine pyrophosphate from free thiamine.
BnaA09G0262300ZS	0.865781	0.794213	0.435609	0.458653	0.00950376	0.892408	UP	AT4G09150	--	--
BnaA09G0132700ZS	0.785113	0.884854	0.29565	0.322647	0.00951621	1.43345	UP	AT5G16640	--	Pentatricopeptide repeat (PPR) superfamily protein
BnaC01G0505000ZS	0.934349	0.87473	0.598865	0.603156	0.00955644	0.589792	UP	AT3G03120	ATARFB1C	A member of ARF GTPase family. A thaliana has 21 members of this family, known to be essential for vesicle coating and uncoating and functions in GTP-binding. Gene encoding ADP-ribosylation factor and similar to ADP-ribosylation factor 1; ARF 1 (GP:385340) {Drosophila melanogaster}, other ARFs and ARF-like proteins.
BnaA02G0008900ZS	0.830807	0.887468	0.506616	0.54082	0.00959387	0.7141	UP	AT5G02770	MOS11	Encodes a conserved eukaryotic protein with homology to the human RNA binding protein CIP29 that localizes to the nucleus. Mutants accumulate more poly(A) mRNAs in the nucleus, likely resulting from reduced mRNA export activity.
BnaA05G0421400ZS	0.608738	0.602851	0.419006	0.378569	0.00960153	0.603209	UP	AT3G12977	NAC1L	NAC (No Apical Meristem) domain transcriptional regulator superfamily protein
BnaC03G0679800ZS	0.626464	0.645895	0.398893	0.351111	0.00961085	0.762534	UP	AT4G39820	TRAPPC12	Tetratricopeptide repeat (TPR)-like superfamily protein
BnaA06G0368500ZS	0.812724	0.875152	0.501982	0.468388	0.00962168	0.798601	UP	AT3G30775	PRODH	Encodes a proline oxidase that is predicted to localize to the inner mitochondrial membrane, its mRNA expression induced by high levels of Al and by osmotic stress. The promoter contains an L-proline-inducible element.
BnaC03G0276100ZS	0.873225	0.812951	0.447288	0.38869	0.00963533	1.01222	UP	AT2G27500	--	Glycosyl hydrolase superfamily protein
BnaC05G0229800ZS	0.641981	0.690961	0.350728	0.30504	0.00964222	1.02336	UP	AT1G25220	WEI7	Catalyzes the first step of tryptophan biosynthesis: Chorismate L-Glutamine = Anthranilate Pyruvate L-Glutamate. Functions as a heterocomplex with anthranilate synthase alpha subunit (ASA1 or ASA2).
BnaA08G0204700ZS	0.815701	0.882289	0.39596	0.448159	0.00967624	1.00831	UP	AT1G30300	--	Metallo-hydrolase/oxidoreductase superfamily protein
BnaC04G0298300ZS	0.610033	0.674429	0.313145	0.318955	0.00968104	1.02294	UP	AT3G57550	GK-2	guanylate kinase
BnaA09G0054500ZS	0.824765	0.743975	0.343779	0.30052	0.00968489	1.2838	UP	AT5G28150	--	Plant protein of unknown function (DUF868)
BnaC08G0435900ZS	1.36705	1.46743	0.538035	0.66497	0.00969565	1.23644	UP	AT2G23980	CNGC6	Encodes a cyclic GMP-activated non-selective cation channel in the plasma membrane of guard cells.
BnaA08G0232900ZS	0.706257	0.761022	0.459084	0.452481	0.0097099	0.686726	UP	AT1G27000	--	Protein of unknown function (DUF1664)
BnaA06G0177500ZS	0.679751	0.730689	0.445257	0.430071	0.00972312	0.688251	UP	AT3G47160	--	RING/U-box superfamily protein
BnaC03G0369200ZS	0.666156	0.604434	0.310983	0.324196	0.00972425	1.00026	UP	AT3G07195	--	RPM1-interacting protein 4 (RIN4) family protein
BnaC05G0560500ZS	0.846584	0.904988	0.582966	0.58095	0.00974465	0.589663	UP	AT3G01390	VMA10	Subunit G of the vacuolar membrane ATPAse complex
BnaA07G0109500ZS	0.975443	1.06538	0.459084	0.515475	0.00976602	1.06633	UP	AT1G26670	VTI1B	member of VTI1 Gene Family. Normally localizes to the transgolgi network and plasma membrane. A dominant mutation (zip1) alters the subcellular localization of VTI12 and suppresses loss of function mutation (zag1) of VTI11. Interacts with members of the SYP family. Involved in protein trafficking to protein storage vacuoles.
BnaA08G0313400ZS	0.542441	0.488819	0.246375	0.246333	0.00976851	1.0656	UP	AT2G33150	PKT3	Encodes an organellar (peroxisome, glyoxysome) 3-ketoacyl-CoA thiolase, involved in fatty acid b-oxidation during germination and subsequent seedling growth. Mutants have defects in glyoxysomal fatty acid beta-oxidation. EC2.3.1.16 thiolase.
BnaA08G0259500ZS	0.87619	0.825586	0.57554	0.548097	0.00976937	0.598866	UP	AT1G17880	BTF3	basic transcription factor 3
BnaC06G0448500ZS	0.461515	0.484183	0.286861	0.312838	0.00978335	0.65714	UP	AT2G21820	--	--
BnaC05G0087800ZS	0.311712	0.329124	0.168568	0.190655	0.00982709	0.835073	UP	AT1G10890	--	--
BnaA07G0085400ZS	1.10035	1.28365	0.162445	0.237912	0.00983918	2.57402	UP	AT1G30260	--	--
BnaC08G0475900ZS	0.779251	0.844745	0.399527	0.340074	0.00985578	1.13473	UP	AT1G17060	SOB7	Encodes a protein with similarity to other cytochrome P450's and is a homolog of BAS1. Over expression causes a dwarf phenotype resembling brassinolide resistant mutants. Double mutant analysis of sob7/bas1 loss of function mutants suggests these genes have redundant functions in light responsiveness. SOB7 may function in metabolizing brassinolides. Expressed in leaf, root, stem and silique but e…
BnaA10G0265600ZS	0.506758	0.484777	0.273455	0.308087	0.00986167	0.769781	UP	AT5G06730	--	Peroxidase superfamily protein
BnaC06G0339300ZS	0.540583	0.538607	0.32241	0.361894	0.00987418	0.657239	UP	AT1G67620	--	Lojap-related protein
BnaA04G0023800ZS	1.34817	1.5109	0.527947	0.428241	0.00990894	1.58018	UP	AT3G58590	--	Pentatricopeptide repeat (PPR) superfamily protein
BnaC03G0614500ZS	0.475344	0.501263	0.274037	0.234906	0.00992318	0.940273	UP	AT3G46930	Raf43	Protein kinase superfamily protein
Bnascaffold0027G0022000ZS	0.688429	0.744618	0.344782	0.387239	0.00994219	0.969129	UP	AT5G63220	GET4	--
BnaA09G0693000ZS	0.929924	0.998505	0.623885	0.612204	0.00994638	0.641644	UP	AT4G00810	RPP1B	60S acidic ribosomal protein family
BnaA02G0208700ZS	0.951652	0.983543	0.589655	0.651671	0.00995017	0.640596	UP	AT1G73885	--	--
BnaC09G0089400ZS	0.506485	0.543404	0.332117	0.340756	0.00996336	0.64183	UP	AT5G65670	IAA9	auxin (indole-3-acetic acid) induced gene
BnaA05G0471200ZS	0.435298	0.453358	0.296083	0.26899	0.00997407	0.653187	UP	AT3G05880	RCI2A	Induced by low temperatures, dehydration and salt stress and ABA. Encodes a small (54 amino acids), highly hydrophobic protein that bears two potential transmembrane domains.
BnaC09G0620000ZS	0.649606	0.639225	0.370736	0.419844	0.00999627	0.70508	UP	AT1G12350	COAB	At1g12350 encodes phosphopantothenoylcysteine synthetase (phosphopantothenoylcysteine ligase). Its molecular function was shown to add cysteine forming (R)-4锟?phospho-N-pantothenoylcysteine (PPC)
BnaC07G0095400ZS	0.187077	0.205973	0.0659934	0.0819338	0.0100189	1.40982	UP	--	--	--
BnaC03G0754200ZS	0.938434	0.887352	0.571943	0.611773	0.0100249	0.625196	UP	AT4G33550	--	Bifunctional inhibitor/lipid-transfer protein/seed storage 2S albumin superfamily protein
BnaC03G0221600ZS	0.586604	0.631348	0.346439	0.370085	0.010033	0.76537	UP	AT3G54620	BZO2H4	bZIP transcription factor-like protein mRNA
BnaA01G0265500ZS	0.670121	0.647477	0.360808	0.298298	0.0100408	0.999329	UP	AT1G58280	--	Phosphoglycerate mutase family protein
BnaA09G0560800ZS	0.560795	0.554805	0.305913	0.351769	0.0100457	0.762357	UP	AT3G61960	ATG1a	Protein kinase superfamily protein
BnaA02G0184800ZS	0.953795	0.881256	0.522614	0.480131	0.0100478	0.871865	UP	AT1G69900	--	Actin cross-linking protein
BnaC06G0397500ZS	0.572713	0.651309	0.21466	0.225643	0.0100984	1.47506	UP	AT1G73340	CYP720A1	Cytochrome P450 superfamily protein
BnaA10G0103200ZS	0.933864	1.01242	0.568558	0.535301	0.0100988	0.818164	UP	AT5G53940	--	Yippee family putative zinc-binding protein
BnaA07G0208700ZS	0.809158	0.783135	0.511619	0.453645	0.0101153	0.722111	UP	AT3G59540	--	Ribosomal L38e protein family
BnaC08G0251600ZS	0.505415	0.515524	0.307271	0.262694	0.0101172	0.840951	UP	AT1G19180	TIFY10A	JAZ1 is a nuclear-localized protein involved in jasmonate signaling. JAZ1 transcript levels rise in response to a jasmonate stimulus. JAZ1 can interact with the COI1 F-box subunit of an SCF E3 ubiquitin ligase in a yeast-two-hybrid assay only in the presence of jasmonate-isoleucine (JA-ILE) or coronatine. Application of jasmonate methyl ester to Arabidopsis roots reduces the levels of a JAZ1:GUS …
BnaA02G0050200ZS	0.815701	0.769438	0.29565	0.194655	0.0101388	1.69286	UP	AT5G13720	--	Uncharacterised protein family (UPF0114)
BnaC05G0125100ZS	0.415386	0.451882	0.241473	0.222901	0.0101729	0.90119	UP	AT1G15120	--	Ubiquinol-cytochrome C reductase hinge protein
BnaA09G0567200ZS	0.809667	0.874444	0.524576	0.522029	0.010183	0.68627	UP	AT3G62860	MAGL12	alpha/beta-Hydrolases superfamily protein
BnaC03G0644100ZS	0.947205	0.958168	0.512221	0.592883	0.0101893	0.785891	UP	AT4G25340	FKBP53	Encodes a member of the FKBP-type immunophilin family that functions as a histone chaparone. Binds to 18S rDNA and represses its expression.
BnaC02G0085500ZS	0.894552	0.866506	0.415958	0.497604	0.0102173	0.946868	UP	AT5G17990	TRP1	Encodes the tryptophan biosynthetic enzyme phosphoribosylanthranilate transferase (PAT1, called trpD in bacteria). Converts anthranilate and phosphoribosylpyrophosphate into phosphoribosylanthranilate and inorganic pyrophosphate.
BnaC09G0244200ZS	0.564206	0.617801	0.280704	0.308565	0.010226	1.00424	UP	AT5G46910	JMJ13	Transcription factor jumonji (jmj) family protein / zinc finger (C5HC2 type) family protein
BnaC05G0428700ZS	0.533452	0.539411	0.373174	0.336558	0.0102765	0.596119	UP	AT3G17410	CARK1	Protein kinase superfamily protein
BnaC05G0565400ZS	0.715527	0.674174	0.435649	0.463928	0.0102868	0.627458	UP	AT3G02110	scpl25	serine carboxypeptidase-like 25
BnaC09G0243300ZS	0.544897	0.511943	0.32489	0.294661	0.0102968	0.770461	UP	--	--	--
BnaA07G0198400ZS	0.751002	0.741688	0.431655	0.489418	0.0103153	0.696527	UP	AT3G57280	FAX1	Transmembrane proteins 14C
BnaC06G0390500ZS	0.717058	0.708372	0.492412	0.443008	0.0103177	0.607711	UP	AT1G72390	PHL	--
BnaC04G0606800ZS	0.726852	0.702919	0.444899	0.489605	0.010321	0.613511	UP	AT2G45700	--	sterile alpha motif (SAM) domain-containing protein
BnaC09G0222000ZS	1.05509	1.00307	0.601047	0.663472	0.0103217	0.702766	UP	AT5G44020	--	HAD superfamily, subfamily IIIB acid phosphatase
BnaC06G0387200ZS	0.280657	0.291757	0.158223	0.131477	0.0103289	0.982498	UP	AT1G70770	--	Protein of unknown function DUF2359, transmembrane
BnaC05G0527100ZS	0.820565	0.849773	0.522841	0.45858	0.0103357	0.767195	UP	AT3G06330	ULS1	RING/U-box superfamily protein
BnaC05G0193200ZS	0.675078	0.727379	0.43592	0.44632	0.0103446	0.668714	UP	AT1G22200	--	Endoplasmic reticulum vesicle transporter protein
BnaA01G0257500ZS	1.07854	1.02592	0.495624	0.586282	0.0103458	0.959872	UP	AT1G56260	TEN1	Required for the maintenance of stem cells through a reduction in DNA damage.
BnaA05G0158100ZS	0.876521	0.804187	0.381295	0.309911	0.0103842	1.28188	UP	AT1G53820	ATL60	RING/U-box superfamily protein
BnaC08G0197600ZS	0.594272	0.561351	0.351965	0.380442	0.0104134	0.657954	UP	AT1G09920	--	TRAF-type zinc finger-related
BnaC01G0480000ZS	0.73835	0.6957	0.436436	0.390676	0.0104561	0.793941	UP	AT4G08520	--	SNARE-like superfamily protein
BnaC01G0373000ZS	0.986898	0.89429	0.464784	0.420517	0.0104566	1.0874	UP	AT3G22270	PATH1	Topoisomerase II-associated protein PAT1
BnaA02G0321900ZS	0.652058	0.619767	0.422358	0.387239	0.0104856	0.651624	UP	AT1G79890	--	--
BnaC03G0147400ZS	0.78692	0.851941	0.487646	0.50329	0.0104863	0.72583	UP	AT5G54165	--	--
BnaC03G0197600ZS	0.462231	0.41811	0.227311	0.220418	0.0104879	0.975437	UP	AT2G35658	--	--
BnaC02G0368300ZS	0.819572	0.760126	0.494391	0.503223	0.0104923	0.663095	UP	AT4G10360	--	TRAM, LAG1 and CLN8 (TLC) lipid-sensing domain containing protein
BnaA05G0477900ZS	0.578352	0.548769	0.241217	0.294623	0.0104938	1.07277	UP	AT3G05090	LRS1	Encodes a DCAF protein. Mutants are defective in lateral root development and suggest roles for DDB1颅Cul4鈥搈ediated protein degradation in regulating auxin accumulation during lateral root primordium development and lateral root meristem emergence.
BnaA01G0348400ZS	1.11413	1.16008	0.555734	0.430852	0.0105116	1.20485	UP	AT3G15460	atBRX1-1	Ribosomal RNA processing Brix domain protein
BnaA06G0425900ZS	0.73204	0.735241	0.374672	0.291982	0.0105148	1.13813	UP	AT5G46170	--	F-box family protein
BnaA02G0271300ZS	0.862488	0.860232	0.463563	0.538133	0.0105371	0.782242	UP	AT4G10360	--	TRAM, LAG1 and CLN8 (TLC) lipid-sensing domain containing protein
BnaA08G0237100ZS	0.6325	0.611216	0.415758	0.373861	0.0105408	0.655427	UP	AT1G23290	RPL27AB	Encodes a ribosomal protein L27A, a constituent of the large subunit of the ribosomal complex. Regulated by TCP20.
BnaC06G0265700ZS	0.166956	0.164428	0.0422358	0.0652806	0.0105546	1.62395	UP	--	--	--
BnaA08G0149200ZS	0.64133	0.704643	0.291281	0.331377	0.0105648	1.11214	UP	AT4G31600	UTr7	Encodes a Golgi-localized UDP鈥揼lucose/UDP鈥揼alactose transporter that affects lateral root emergence.
BnaC02G0039300ZS	0.914332	0.978286	0.635326	0.617931	0.0105756	0.5947	UP	AT5G10160	--	Thioesterase superfamily protein
BnaA06G0394000ZS	1.59742	1.49153	0.915108	0.82354	0.010578	0.829146	UP	AT3G25700	--	Eukaryotic aspartyl protease family protein
BnaC07G0137600ZS	0.713739	0.650525	0.351965	0.372383	0.0106054	0.913367	UP	AT1G29670	GGL6	GDSL-like Lipase/Acylhydrolase superfamily protein
BnaC04G0610700ZS	1.24101	1.12504	0.599291	0.625034	0.0106529	0.950489	UP	AT2G46500	UBDK GAMMA 4	Phosphoinositide kinase which undergo autophosphorylation and phosphorylate serine/threonine residues of protein substrates. Contains phosphoinositide 3/4-kinase and ubiquitin-like domains. Phosphorylates PUFD1 and RPN10 in vitro.
BnaA02G0021400ZS	0.799631	0.745763	0.483951	0.505143	0.0106548	0.643794	UP	AT5G06060	--	NAD(P)-binding Rossmann-fold superfamily protein
BnaA06G0388400ZS	0.6725	0.689572	0.275451	0.350197	0.0106663	1.12238	UP	AT3G26690	NUDX13	Encodes AtNUDT13, a mitochondrial Nudix hydrolase specific for long-chain diadenosine polyphosphates.
BnaA02G0200900ZS	0.469481	0.432444	0.273884	0.271899	0.0106731	0.724681	UP	AT1G72540	PBL33	Protein kinase superfamily protein
BnaA01G0121600ZS	1.1859	1.14853	0.403375	0.543059	0.0106794	1.3025	UP	AT4G22110	--	GroES-like zinc-binding dehydrogenase family protein
BnaC04G0329100ZS	0.503934	0.509187	0.251192	0.191918	0.0107232	1.19307	UP	AT3G54020	AtIPCS1	Inositol phosphorylceramide synthase
BnaC08G0396500ZS	0.335877	0.357416	0.18101	0.149884	0.0107342	1.06709	UP	AT3G60480	--	--
BnaC09G0005300ZS	0.32713	0.37617	0.117322	0.10706	0.0107677	1.64818	UP	--	--	--
BnaC03G0560700ZS	0.567921	0.597837	0.373624	0.401476	0.0107705	0.588814	UP	AT5G61910	--	DCD (Development and Cell Death) domain protein
BnaC02G0186700ZS	0.91505	0.889128	0.543945	0.464867	0.0107708	0.838684	UP	AT5G52390	--	PAR1 protein
BnaA06G0278000ZS	0.712726	0.706528	0.419414	0.351897	0.010773	0.879748	UP	AT5G62480	GSTU9	Encodes glutathione transferase belonging to the tau class of GSTs. Naming convention according to Wagner et al. (2002).
BnaC03G0016600ZS	0.765409	0.792018	0.457482	0.387803	0.0107922	0.881655	UP	AT5G03850	--	Nucleic acid-binding, OB-fold-like protein
BnaC08G0342100ZS	0.66059	0.677402	0.4522	0.404677	0.0108002	0.642909	UP	AT3G54150	EFD	S-adenosyl-L-methionine-dependent methyltransferases superfamily protein
BnaC01G0161300ZS	0.674086	0.738661	0.32489	0.267651	0.0108881	1.25352	UP	AT4G23030	--	MATE efflux family protein
BnaC08G0357200ZS	2.85495	3.19207	1.20255	1.34989	0.0109028	1.24435	UP	--	--	--
BnaC01G0429200ZS	0.722019	0.670872	0.454706	0.451285	0.0109029	0.620513	UP	AT3G15660	GRXS15	glutaredoxin 4
Bnascaffold0071G0000400ZS	0.710041	0.743057	0.41689	0.466929	0.0109089	0.717308	UP	AT2G03760	SULT202A1	Encodes a brassinosteroid sulfotransferase. In vitro experiements show that this enzyme has a preference for 24-epibrassinosteroids, particularly 24-epicathasterone, but does not act on castasterone and brassinolide. It also shows sulfating activity toward flavonoids. It is differentially expressed during development, being more abundant in young seedlings and actively growing cell cultures. Expr…
BnaC03G0591700ZS	0.876521	0.845298	0.570754	0.510969	0.0109212	0.670603	UP	AT3G42660	EOL1	transducin family protein / WD-40 repeat family protein
BnaA04G0001500ZS	0.54903	0.517062	0.272773	0.221722	0.0109227	1.1083	UP	AT3G63210	MARD1	encodes a novel zinc-finger protein with a proline-rich N-terminus, identical to senescence-associated protein SAG102
BnaC09G0345100ZS	0.402622	0.365272	0.190824	0.1696	0.0109333	1.09121	UP	AT5G52520	PRORS1	Class II aaRS and biotin synthetases superfamily protein
BnaA03G0234100ZS	0.678997	0.674339	0.427205	0.474687	0.0109851	0.585493	UP	AT2G27389	--	--
BnaC03G0374900ZS	0.896102	0.835196	0.492963	0.433463	0.0110065	0.902107	UP	AT3G10020	HUP26	--
BnaC01G0143200ZS	0.53789	0.538607	0.276544	0.326624	0.0110125	0.835712	UP	AT4G21585	ENDO4	Encodes a putative endonuclease but no demonstrable endonuclease activity, either towards single stranded DNA or mismatches, has been seen in vitro.
BnaC09G0416600ZS	0.655195	0.703886	0.446183	0.430702	0.0110418	0.632172	UP	AT5G58375	--	Methyltransferase-related protein
BnaC03G0337400ZS	0.74668	0.813985	0.452992	0.427055	0.0110451	0.82651	UP	AT4G00370	PHT4;4	--
Bnascaffold0027G0038900ZS	0.951652	1.01884	0.568558	0.617655	0.0110719	0.732193	UP	AT2G03090	EXPA15	member of Alpha-Expansin Gene Family. Naming convention from the Expansin Working Group (Kende et al, 2004. Plant Mol Bio). Involved in the formation of nematode-induced syncytia in roots of Arabidopsis thaliana.
BnaA05G0173000ZS	0.78281	0.762208	0.527947	0.474124	0.0110799	0.62464	UP	AT1G33790	--	jacalin lectin family protein
BnaC07G0274100ZS	0.642871	0.710917	0.345974	0.319302	0.0110813	1.02498	UP	AT2G01890	PAP8	Encodes a purple acid phosphatase (PAP) belonging to the low molecular weight plant PAP group.
BnaA03G0387700ZS	1.19528	1.29964	0.727688	0.753851	0.011086	0.751896	UP	--	--	--
BnaA09G0408700ZS	0.525049	0.577079	0.287971	0.303337	0.011092	0.898309	UP	AT1G30520	AAE14	Encodes a chloroplast O-succinylbenzoyl-CoA ligase. Involved in phylloquinone biosynthesis. Knock mutant is seedling lethal.
BnaC03G0052400ZS	1.33746	1.37425	0.430977	0.605123	0.0110962	1.38804	UP	AT2G37410	TIM17-2	Mitochondrial inner membrane translocase. Together with AtTIM17-1, TIM17-2 has a long C-terminal extension not present in other TIMs. The extension is located in the outer membrane and so TIM17-2 links the inner and outer mitochondrial membranes. The C-terminal region is essential for protein import into mitochondria via the general import pathway but is not necessary for import via the carrier p…
BnaC08G0122300ZS	0.951652	0.923326	0.475152	0.369173	0.0111398	1.151	UP	AT2G23180	CYP96A1	member of CYP96A
BnaA02G0016700ZS	0.665572	0.721849	0.425983	0.408671	0.0111563	0.733156	UP	AT5G04550	--	Protein of unknown function (DUF668)
BnaC09G0463800ZS	1.56436	1.50213	0.687559	0.839352	0.0111649	1.00597	UP	AT5G19980	GONST4	Encodes a Golgi-localized nucleotide-sugar transporter.
BnaC09G0536000ZS	0.490823	0.527851	0.32734	0.310666	0.0111896	0.675051	UP	AT5G12140	CYS1	Encodes a cystatin.
BnaA08G0006500ZS	0.994263	0.936516	0.595475	0.641835	0.0112121	0.641976	UP	AT3G13520	ATAGP12	Encodes a GPI-anchored arabinogalactan (AG) peptide with a short 'classical' backbone of 10 amino acids, seven of which are conserved among the 4 other Arabidopsis AG peptides. These peptides may be involved in cell signaling.
BnaA01G0163800ZS	0.861773	0.804951	0.482039	0.42393	0.0112216	0.879483	UP	AT4G27020	--	--
BnaA05G0352600ZS	0.685931	0.750574	0.337451	0.379172	0.0112304	1.00328	UP	AT3G20510	FAX6	Transmembrane proteins 14C
BnaC08G0066500ZS	0.608714	0.649176	0.272952	0.330102	0.0112423	1.06065	UP	AT1G44100	AAP5	amino acid permease 5
BnaA04G0190700ZS	0.603486	0.645794	0.348644	0.300369	0.011243	0.944777	UP	AT2G29500	HSP17.6B	HSP20-like chaperones superfamily protein
BnaC04G0014100ZS	0.655465	0.621615	0.375096	0.414721	0.0112469	0.693259	UP	AT2G46540	--	--
BnaC04G0488000ZS	0.813748	0.748141	0.468566	0.446588	0.0112526	0.771204	UP	AT2G28800	ALB3	member of Chloroplast membrane protein ALBINO3 family. Similar to pea PPF1 and may play a role in plant senescence.
BnaC07G0230300ZS	0.668491	0.69008	0.420338	0.466086	0.011285	0.616021	UP	AT5G44390	AtBBE25	FAD-binding Berberine family protein
BnaA08G0034800ZS	0.320556	0.323764	0.196615	0.220743	0.0113064	0.626493	UP	AT4G19960	KUP9	Encodes a potassium ion transmembrane transporter. Also mediates cesium uptake when expressed in E. coli.
BnaC03G0094800ZS	0.416348	0.364471	0.108297	0.133825	0.0113243	1.68925	UP	--	--	--
BnaC03G0636300ZS	0.343188	0.372634	0.207205	0.189727	0.011335	0.85071	UP	AT1G24350	--	Acid phosphatase/vanadium-dependent haloperoxidase-related protein
BnaA06G0292200ZS	0.767386	0.72562	0.415404	0.466089	0.0113386	0.7602	UP	AT5G64130	--	cAMP-regulated phosphoprotein 19-related protein
BnaC01G0042900ZS	0.671198	0.633381	0.375601	0.322566	0.0113419	0.90194	UP	AT4G34480	--	O-Glycosyl hydrolases family 17 protein
BnaA09G0630500ZS	0.815701	0.888039	0.385807	0.44553	0.0113651	1.0352	UP	AT1G14850	NUP155	Encodes a protein similar to nucleoporin, a a major component of the nuclear pore complex (NPC) involved in cellular nucleo-cytoplasmic transport
BnaA09G0067800ZS	0.787791	0.732093	0.475152	0.441623	0.0114208	0.72932	UP	AT5G24430	--	Calcium-dependent protein kinase (CDPK) family protein
BnaC07G0262100ZS	0.914622	0.797936	0.317755	0.311672	0.0114382	1.44404	UP	AT5G47710	--	Calcium-dependent lipid-binding (CaLB domain) family protein
BnaC06G0079900ZS	0.37782	0.404603	0.240992	0.218725	0.0114499	0.767202	UP	AT5G41010	NRPE12	Non-catalytic subunit common to nuclear DNA-dependent RNA polymerases II, IV and V; homologous to budding yeast RPB12.
BnaC08G0013400ZS	0.49616	0.470598	0.272676	0.305886	0.011455	0.740683	UP	AT2G33150	PKT3	Encodes an organellar (peroxisome, glyoxysome) 3-ketoacyl-CoA thiolase, involved in fatty acid b-oxidation during germination and subsequent seedling growth. Mutants have defects in glyoxysomal fatty acid beta-oxidation. EC2.3.1.16 thiolase.
BnaC06G0439700ZS	0.801806	0.786174	0.404385	0.478864	0.011461	0.846301	UP	AT1G78280	JMJ21	transferases, transferring glycosyl groups
BnaC03G0055300ZS	0.996968	0.99136	0.647819	0.564125	0.0114725	0.714233	UP	AT5G12020	HSP17.6II	17.6 kDa class II heat shock protein
BnaA03G0006900ZS	0.493356	0.483109	0.30135	0.336475	0.0114735	0.614408	UP	AT5G02530	ALY2	RNA-binding (RRM/RBD/RNP motifs) family protein
BnaC07G0142200ZS	0.82305	0.839387	0.511275	0.43571	0.011476	0.811886	UP	AT1G29040	--	--
BnaA06G0009800ZS	0.883676	0.755448	0.211179	0.229415	0.0114772	1.89541	UP
BnaA09G0630000ZS	0.936999	0.910511	0.567397	0.485662	0.0114953	0.810996	UP	AT1G14870	PCR2	PCR2 encodes a membrane protein involved in zinc transport and detoxification.
BnaA09G0633800ZS	0.739584	0.823649	0.386303	0.358361	0.01151	1.06987	UP	AT1G14370	PBL2	Encodes protein kinase APK2a. Protein is N-myristoylated.
BnaA03G0501500ZS	0.368731	0.361301	0.189206	0.222816	0.0115134	0.825239	UP	AT4G28025	--	--
BnaC03G0527700ZS	0.513	0.478665	0.320103	0.332931	0.0115139	0.602694	UP	AT5G64850	--	--
BnaC05G0135400ZS	0.848006	0.932468	0.501876	0.499132	0.0115506	0.830808	UP	AT1G16270	B4	Protein kinase superfamily protein with octicosapeptide/Phox/Bem1p domain
BnaC09G0200400ZS	0.679751	0.595694	0.252154	0.247062	0.0115657	1.35327	UP	AT1G57770	--	FAD/NAD(P)-binding oxidoreductase family protein
BnaA01G0145600ZS	0.586483	0.638867	0.263974	0.311222	0.0115691	1.09107	UP	AT4G25030	AtNHR2B	--
BnaC07G0062700ZS	0.815043	0.790607	0.38976	0.467279	0.0115841	0.905725	UP	AT3G44840	--	S-adenosyl-L-methionine-dependent methyltransferases superfamily protein
BnaA05G0452200ZS	0.474296	0.499754	0.26959	0.223937	0.0116273	0.980867	UP	AT3G08610	--	--
BnaA06G0042200ZS	0.554402	0.513401	0.295432	0.32222	0.0116316	0.789781	UP	AT1G48230	--	Nucleotide/sugar transporter family protein
BnaA09G0629000ZS	0.570991	0.587571	0.140786	0.22539	0.0116318	1.66173	UP	AT1G15060	--	Uncharacterised conserved protein UCP031088, alpha/beta hydrolase
BnaA06G0322600ZS	0.849166	0.91717	0.556485	0.570988	0.0116396	0.647668	UP	AT5G23590	--	DNAJ heat shock N-terminal domain-containing protein
BnaA05G0453200ZS	0.695438	0.664795	0.334796	0.256945	0.0116458	1.20082	UP	AT3G08040	MAN1	Encodes a member of the MATE (multidrug and toxin efflux family), expressed in roots but not shoots. Mutants accumulate excess iron, manganese and zinc, and express root Fe(III) chelatase activity even under iron sufficiency conditions. FRD3 is likely to function in root xylem loading of an iron chelator or other factor necessary for efficient iron uptake out of the xylem or apoplastic space and …
BnaA05G0371400ZS	1.07578	0.961271	0.496891	0.488753	0.0117124	1.04734	UP	AT3G18773	ATL77	RING/U-box superfamily protein
BnaA06G0278900ZS	0.725872	0.711691	0.312361	0.213806	0.0117259	1.45003	UP	AT5G62570	CBP60a	Calmodulin binding protein-like
BnaC05G0288400ZS	0.134472	0.139195	0.0536895	0.0339105	0.0117341	1.64342	UP	AT3G50000	CKA2	Encodes the casein kinase II (CK2) catalytic subunit (alpha).
BnaA08G0148600ZS	0.548234	0.60753	0.305424	0.307932	0.0117615	0.91405	UP	AT4G31750	WIN2	Encodes HopW1-1-Interacting protein 2 (WIN2). Interacts with the P. syringae effector HopW1-1. WIN2 has protein phosphatase activity. Modulates plant defenses against bacteria. Three WIN proteins are identified so far (WIN1: AT1G80600; WIN2: AT4G31750; WIN3: AT5G13320).
BnaC03G0482200ZS	0.710989	0.647163	0.376977	0.350767	0.0117683	0.900141	UP	AT2G06050	OPR3	Encodes a 12-oxophytodienoate reductase that is required for jasmonate biosynthesis. Mutants are male sterile and defective in pollen dehiscence. Shows activity towards 2,4,6-trinitrotoluene.
BnaC02G0425900ZS	0.531454	0.512959	0.241902	0.17584	0.0117727	1.32201	UP	AT2G01450	MPK17	member of MAP Kinase
BnaA10G0262500ZS	0.723791	0.702657	0.378832	0.441717	0.0117772	0.797765	UP	AT5G07475	--	Cupredoxin superfamily protein
BnaC03G0198200ZS	0.583508	0.624353	0.332017	0.369537	0.0117876	0.78383	UP	AT2G35760	CASPL2B2	Uncharacterised protein family (UPF0497)
BnaA02G0189800ZS	0.967947	0.910546	0.546735	0.602329	0.0117894	0.709117	UP	AT1G70670	PXG4	The gene encodes a stress-responsive and OB-associated non-seed caleosin-like protein. It plays a negative regulator role in ABA signaling.
BnaC03G0623800ZS	0.489821	0.524317	0.312721	0.33357	0.0117951	0.649996	UP	AT3G47930	GLDH	L-Galactono-1,4-lactone dehydrogenase, catalyzes the final step of ascorbate biosynthesis
BnaA10G0267800ZS	0.350608	0.397985	0.15938	0.155724	0.0118035	1.24835	UP	AT5G06440	--	--
BnaA06G0330700ZS	1.46797	1.54773	0.903525	0.781115	0.0118344	0.840056	UP	AT5G24660	LSU2	response to low sulfur 2
BnaA03G0277200ZS	0.863999	0.93494	0.434018	0.497604	0.0118509	0.94933	UP	AT4G01090	--	Protein of unknown function (DUF3133)
BnaA10G0083500ZS	0.644286	0.596205	0.332042	0.282905	0.0118637	1.01238	UP	AT5G51050	APC2	Encodes a mitochondrial ATP-Mg/Pi transporter. Binds to calcium.
BnaC02G0048200ZS	0.581224	0.634243	0.35032	0.364978	0.0118802	0.764894	UP	AT5G11740	ATAGP15	Encodes arabinogalactan protein (AGP15).
BnaC05G0229400ZS	1.9033	1.84665	0.377105	0.669126	0.0118891	1.84167	UP
BnaC05G0464800ZS	0.812385	0.747454	0.295029	0.369173	0.0118934	1.2317	UP	AT3G13845	--	--
BnaA02G0307900ZS	0.951652	0.877916	0.367268	0.256945	0.0119034	1.55139	UP	AT4G34880	--	Amidase family protein
BnaA01G0383500ZS	0.678492	0.623703	0.39596	0.37565	0.0119119	0.755002	UP	AT3G09830	PCRK1	Protein kinase superfamily protein
BnaC05G0105600ZS	0.707638	0.660679	0.309302	0.369045	0.0119131	1.01231	UP	AT1G11960	OSCA1.3	ERD (early-responsive to dehydration stress) family protein
BnaA04G0004500ZS	0.798159	0.83539	0.362964	0.257738	0.0119277	1.39604	UP	AT3G62910	cpRF1	Encodes a plastid-localized ribosome release factor 1 that is essential in chloroplast development. Pale green, albino mutant seedlings arrest early in seedling development.
BnaA05G0465200ZS	0.499992	0.543694	0.318567	0.324691	0.0119281	0.69822	UP	AT3G06500	A/N-InvC	Encodes an alkaline/neutral invertase which localizes in mitochondria. It may be modulating hormone balance in relation to the radicle emergence. Mutants display severely reduced shoot growth and reduced oxygen consumption. Mutant root development is not affected as reported for A/N-InvA mutant (inva) plants.
BnaA08G0232800ZS	0.39261	0.446491	0.162445	0.136937	0.0119813	1.48685	UP	AT1G26970	PBL4	Protein kinase superfamily protein
BnaA02G0027600ZS	0.824765	0.883181	0.50358	0.443008	0.0119971	0.851454	UP	AT5G08040	TOM5	mitochondrial import receptor subunit TOM5 homolog
BnaA02G0314600ZS	0.565979	0.614615	0.228452	0.284037	0.0120017	1.20392	UP	AT2G01450	MPK17	member of MAP Kinase
BnaA06G0441100ZS	0.66904	0.66754	0.398528	0.452309	0.0120468	0.651591	UP	AT5G43630	TZP	Encodes a zinc knuckle protein that negatively regulates morning specific growth. The role of TZP in hypocotyl elongation was established through a QTL analysis of BayXSha RIL populations. The Bay-0 allele contains a deletion causing a frameshift mutation. TZP is under circadian control and acts to regulate morning-specific hypocotyl growth.
BnaA10G0183900ZS	0.804993	0.851427	0.467555	0.524666	0.0120592	0.739336	UP	AT5G19010	MPK16	member of MAP Kinase
BnaC07G0154700ZS	0.645187	0.591875	0.314522	0.349109	0.0120599	0.898466	UP	AT1G24490	STIC1	Homologue of the Alb3/Oxa1/YidC family. ALB4 is almost identical to the Alb3/Oxa1/YidC domain of the previously described 110 kDa inner envelope protein ARTEMIS. However, ALB4 is expressed as a separate 55 kDa protein and is located in the thylakoid membrane of chloroplasts. Analysis of a T-DNA insertion line with a reduced level of Alb4 revealed chloroplasts with an altered ultrastructure. Mutan…
BnaA02G0272300ZS	0.578374	0.626542	0.267315	0.201457	0.0120632	1.36197	UP	AT2G07180	PBL17	Protein kinase superfamily protein
BnaC01G0015100ZS	0.645326	0.726776	0.316768	0.31995	0.0120644	1.10766	UP	AT4G37730	bZIP7	basic leucine-zipper 7
BnaA10G0157000ZS	0.992804	0.923326	0.367268	0.465262	0.0120674	1.20262	UP	AT5G60460	--	Preprotein translocase Sec, Sec61-beta subunit protein
BnaA10G0243400ZS	0.76203	0.757032	0.521039	0.461761	0.0120832	0.62821	UP	AT5G65270	RABA4a	RAB GTPase homolog A4A
BnaC05G0140300ZS	0.906207	0.945575	0.596532	0.525815	0.0120889	0.722395	UP	AT1G16850	--	--
BnaC06G0057900ZS	0.514828	0.534557	0.198757	0.261122	0.0120895	1.19022	UP	--	--	--
BnaC08G0290700ZS	0.601043	0.531612	0.222293	0.247062	0.0121272	1.27096	UP	AT3G48660	--	Protein of unknown function (DUF 3339)
BnaA04G0026900ZS	0.384372	0.374884	0.179217	0.218309	0.012142	0.933536	UP	AT3G57930	--	--
BnaA05G0452500ZS	0.868899	0.769438	0.224658	0.298773	0.0121524	1.64616	UP	AT3G08550	KOB1	mutant is Dwarfed and shows defects in cell elongation; Cellulose deficient; Plasma Membrane Protein
BnaC01G0347200ZS	0.627175	0.717902	0.258189	0.228306	0.0121524	1.46719	UP	AT1G61890	--	MATE efflux family protein
BnaC05G0125400ZS	0.535304	0.494306	0.277867	0.305886	0.0121788	0.818667	UP	AT1G15140	FNRL	FAD/NAD(P)-binding oxidoreductase
BnaC06G0290500ZS	0.339876	0.348425	0.241347	0.217224	0.0121853	0.585894	UP	AT1G72190	--	D-isomer specific 2-hydroxyacid dehydrogenase family protein
BnaC08G0172200ZS	0.516289	0.485237	0.303641	0.330351	0.0121928	0.659664	UP	AT4G27130	--	Translation initiation factor SUI1 family protein
BnaC04G0133100ZS	0.361211	0.380193	0.159984	0.19826	0.0122061	1.04932	UP	AT2G33710	--	encodes a member of the ERF (ethylene response factor) subfamily B-4 of ERF/AP2 transcription factor family. The protein contains one AP2 domain. There are 7 members in this subfamily.
BnaA10G0194000ZS	1.13784	1.23445	0.518999	0.617355	0.0122146	1.06187	UP	AT5G17550	PEX19B	peroxin 19-2
BnaA04G0255800ZS	0.891715	0.939627	0.494176	0.401348	0.0122326	1.0321	UP	AT2G39410	MAGL7	alpha/beta-Hydrolases superfamily protein
BnaA08G0163400ZS	0.610219	0.562024	0.323705	0.351291	0.0122434	0.796321	UP	AT4G28440	--	Nucleic acid-binding, OB-fold-like protein
BnaC02G0261300ZS	0.854324	0.79406	0.545545	0.521214	0.0122564	0.627817	UP	AT1G71970	--	--
BnaC02G0434700ZS	0.475826	0.52188	0.186334	0.231964	0.0122894	1.25408	UP	AT2G02360	PP2-B10	Encodes an F-box protein containing a Nictaba-related lectin domain that can act as a carbohydrate-binding protein.
BnaA06G0115300ZS	0.67673	0.742675	0.416409	0.404207	0.0123128	0.790507	UP	AT1G16930	--	F-box/RNI-like/FBD-like domains-containing protein
BnaC03G0336200ZS	0.826053	0.880064	0.534099	0.478171	0.012325	0.753122	UP	AT4G00700	MCTP9	C2 calcium/lipid-binding plant phosphoribosyltransferase family protein
BnaA10G0131400ZS	0.713739	0.813406	0.154521	0.234194	0.0123307	1.97405	UP	AT5G57270	--	Core-2/I-branching beta-1,6-N-acetylglucosaminyltransferase family protein
BnaC04G0465100ZS	0.212115	0.192672	0.10399	0.112301	0.0123507	0.904194	UP	AT5G58470	TAF15b	TBP-associated factor 15B
BnaA03G0080500ZS	0.539269	0.586697	0.240942	0.177252	0.0123551	1.42892	UP	AT5G18790	--	Ribosomal protein L33 family protein
BnaA02G0174300ZS	0.56123	0.587571	0.364101	0.318903	0.0123799	0.750163	UP	AT1G68490	--	--
BnaC09G0009300ZS	1.26887	1.28087	0.794177	0.673182	0.0123851	0.797127	UP	AT4G02330	PME41	Encodes a pectin methylesterase that is sensitive to chilling stress and brassinosteroid regulation.
BnaC08G0362000ZS	0.54903	0.483236	0.172783	0.122355	0.012412	1.80636	UP	AT3G56320	NTP7	PAP/OAS1 substrate-binding domain superfamily
BnaA10G0235100ZS	0.592832	0.5682	0.269149	0.194655	0.0124281	1.32382	UP	AT5G11470	SG1	bromo-adjacent homology (BAH) domain-containing protein
BnaA10G0290100ZS	1.21119	1.05523	0.43478	0.38931	0.0124501	1.45954	UP	AT5G03670	TRM28	--
BnaA09G0472400ZS	0.475826	0.461663	0.263974	0.21412	0.0124889	0.971507	UP	AT3G50660	SNP2	Encodes a 22&#945; hydroxylase whose reaction is a rate-limiting step in brassinosteroid biosynthetic pathway. The protein is a member of CYP90B gene family. CLM is an epi-allele with small, compressed rosette, reduced internode length, and reduced fertility, appears in selfed ddm mutant plants possibly due to loss of cytosine methylation. Transcripts accumulate in actively growing tissues, and G…
BnaC03G0350500ZS	0.537003	0.512959	0.329967	0.287477	0.012503	0.765958	UP	AT3G03560	--	--
BnaC07G0169300ZS	0.575252	0.532688	0.366509	0.359363	0.0125216	0.610093	UP	AT1G27150	--	Tetratricopeptide repeat (TPR)-like superfamily protein
BnaC01G0244300ZS	0.985371	1.06602	0.669805	0.668403	0.0125516	0.616301	UP	AT4G15770	--	RNA binding
BnaC01G0089000ZS	0.535804	0.584491	0.286483	0.318526	0.0125541	0.888849	UP	AT4G29850	--	Eukaryotic protein of unknown function (DUF872)
BnaC05G0046500ZS	0.983373	1.05068	0.575942	0.489418	0.0125652	0.933017	UP	AT1G06475	--	--
BnaC09G0429200ZS	0.669985	0.761389	0.223978	0.276378	0.0125656	1.51637	UP	AT5G59490	--	Haloacid dehalogenase-like hydrolase (HAD) superfamily protein
BnaA03G0431000ZS	0.976586	0.994031	0.616447	0.524102	0.0125768	0.788918	UP	AT4G15990	--	--
BnaA01G0350800ZS	0.780354	0.832804	0.43781	0.362115	0.0125817	1.01195	UP	AT3G15060	RABA1g	RAB GTPase homolog A1G
BnaC02G0135200ZS	1.00506	1.06219	0.63765	0.697859	0.0126225	0.630324	UP	AT5G07090	--	Ribosomal protein S4 (RPS4A) family protein
BnaA02G0129700ZS	0.76942	0.818619	0.436922	0.362115	0.0126338	0.990912	UP	AT5G55125	--	Ribosomal protein L31
BnaC07G0087400ZS	0.69031	0.637043	0.430297	0.426711	0.0126402	0.631172	UP	AT2G04900	--	--
BnaA03G0274200ZS	0.727734	0.666846	0.279997	0.343142	0.0126838	1.1622	UP	AT4G01895	--	systemic acquired resistance (SAR) regulator protein NIMIN-1-related
BnaA09G0109500ZS	0.606787	0.654299	0.36683	0.322421	0.0126889	0.871567	UP	AT4G34950	MFS1	Major facilitator superfamily protein
BnaA04G0160900ZS	0.595061	0.631509	0.374874	0.409597	0.0127191	0.644838	UP	AT2G24330	LNPB	Protein of unknown function (DUF2296)
BnaC03G0019600ZS	0.83836	0.858908	0.445455	0.525568	0.0127222	0.805635	UP	AT5G04550	--	Protein of unknown function (DUF668)
Bnascaffold0027G0010400ZS	0.779894	0.734928	0.421679	0.475823	0.0127506	0.755161	UP	AT3G09270	GSTU8	Encodes glutathione transferase belonging to the tau class of GSTs. Naming convention according to Wagner et al. (2002).
BnaA06G0389900ZS	0.496757	0.5682	0.186662	0.212443	0.0127633	1.41595	UP	AT3G26440	--	Protein of unknown function (DUF707)
BnaC04G0071800ZS	0.622477	0.620896	0.200102	0.286473	0.0127802	1.35353	UP	AT2G39660	BIK1	Encodes a plasma membrane-localized ser/thr protein kinase that is a crucial component of host response signaling required to activate the resistance responses to Botrytis and A. brassicicola infection. It is likely a negative regulator of salicylic acid accumulation and basal defense against virulent bacterial pathogens.
BnaA06G0090400ZS	0.86163	0.954803	0.392891	0.452947	0.0127939	1.10266	UP	AT1G13990	--	--
BnaC02G0106000ZS	0.659441	0.701395	0.403093	0.444143	0.0128101	0.683659	UP	AT5G21090	--	Leucine-rich repeat (LRR) family protein
BnaC02G0007100ZS	0.48138	0.518049	0.326441	0.337729	0.0128449	0.589552	UP	AT5G02880	UPL4	encodes a ubiquitin-protein ligase containing a HECT domain. There are six other HECT-domain UPLs in Arabidopsis.
BnaC01G0068500ZS	0.288894	0.323974	0.129956	0.145991	0.0128536	1.15118	UP	AT4G32160	--	Phox (PX) domain-containing protein
BnaC08G0492900ZS	0.337683	0.333423	0.0918169	0.0289352	0.012862	2.47449	UP	AT1G14205	u18-L8	Ribosomal L18p/L5e family protein
BnaA04G0004800ZS	0.840188	0.899553	0.584669	0.548559	0.0128719	0.618435	UP	AT2G47610	--	Ribosomal protein L7Ae/L30e/S12e/Gadd45 family protein
BnaA01G0338700ZS	0.951652	0.837435	0.39596	0.369173	0.0128737	1.22544	UP	AT3G16870	GATA17	Encodes a member of the GATA factor family of zinc finger transcription factors.
BnaC03G0535900ZS	1.2136	1.11569	0.485711	0.590677	0.0128739	1.11369	UP	AT5G64000	SAL2	3'(2'),5'-bisphosphate nucleotidase
BnaA06G0058800ZS	0.874491	0.961167	0.393372	0.464452	0.0128878	1.09754	UP	AT1G09645	--	--
BnaC03G0602400ZS	0.764622	0.716277	0.447288	0.48724	0.0129213	0.664162	UP	AT3G44990	XTR8	Encodes a xyloglucan endotransglycosylase/hydrolase.
BnaA02G0214300ZS	0.597465	0.633875	0.318968	0.252541	0.0129248	1.10738	UP	AT1G75280	--	isoflavone reductase, putative, identical to SP:P52577 Isoflavone reductase homolog P3 (EC 1.3.1.-) {Arabidopsis thaliana}; contains Pfam profile PF02716: isoflavone reductase. Involved in response to oxidative stress.
BnaC07G0230500ZS	1.4592	1.34948	0.833601	0.892168	0.012936	0.70265	UP	AT5G44440	AtBBE28	FAD-binding Berberine family protein
BnaC02G0040400ZS	0.65426	0.627361	0.442794	0.400124	0.0129634	0.604506	UP	AT5G10430	JAGGER	Encodes arabinogalactan-protein (AGP4).
BnaC09G0073400ZS	0.844996	0.805915	0.551796	0.494254	0.0129681	0.65831	UP	AT5G62890	--	Xanthine/uracil permease family protein
BnaA03G0142600ZS	0.710509	0.655616	0.446024	0.438457	0.012979	0.627185	UP	AT5G50870	UBC27	ubiquitin-conjugating enzyme 27
BnaC09G0582000ZS	0.922241	0.997484	0.631829	0.6116	0.0130146	0.626576	UP	AT5G03495	--	RNA-binding (RRM/RBD/RNP motifs) family protein
BnaC09G0239000ZS	0.913201	0.826699	0.49595	0.478954	0.0130209	0.835672	UP	AT5G46330	FLS2	Encodes a leucine-rich repeat serine/threonine protein kinase that is expressed ubiquitously. FLS2 is involved in MAP kinase signalling relay involved in innate immunity. Essential in the perception of flagellin, a potent elicitor of the defense response. FLS2 is directed for degradation by the bacterial ubiquitin ligase AvrPtoB.
BnaC03G0276200ZS	0.736762	0.636346	0.240583	0.203414	0.0130224	1.62882	UP	AT2G27490	ATCOAE	AT2G27490 encodes dephospho-CoA kinase. The molecular function was shown to phosphorylate the ribosyl moiety forming CoA.
BnaC05G0341700ZS	0.640937	0.587941	0.376314	0.385747	0.0130368	0.689363	UP	AT1G32350	AOX1D	alternative oxidase 1D
BnaC01G0289800ZS	0.999234	0.876575	0.40975	0.396519	0.0130456	1.21818	UP	AT3G47940	--	DNAJ heat shock family protein
BnaA04G0194100ZS	1.12929	1.19139	0.521264	0.63975	0.0130465	0.999163	UP	AT2G30000	--	PHF5-like protein
BnaC09G0293000ZS	0.438457	0.400784	0.201862	0.229981	0.0130549	0.958578	UP	AT4G11480	CRK32	Encodes a cysteine-rich receptor-like protein kinase.
BnaA07G0292300ZS	0.786147	0.820734	0.351965	0.239963	0.0130777	1.44077	UP	AT1G67310	--	Calmodulin-binding transcription activator protein with CG-1 and Ankyrin domains
BnaC02G0000100ZS	0.518121	0.483136	0.27329	0.30714	0.0131188	0.786618	UP	AT5G01850	--	Protein kinase superfamily protein
BnaC04G0120100ZS	0.504186	0.519371	0.327691	0.282298	0.013132	0.746735	UP	AT1G30620	UXE1	encodes a type-II membrane protein that catalyzes 4-epimerization of UDP-D-Xylose to UDP-L-Arabinose in vitro, the nucleotide sugar used by glycosyltransferases in the arabinosylation of cell wall polysaccharides and wall-resident proteoglycans.
BnaC05G0377500ZS	0.969607	0.893779	0.59514	0.56504	0.0131941	0.683578	UP	AT3G20970	NFU4	Encodes a protein containing the NFU domain that may be involved in iron-sulfur cluster assembly. Part of a five member gene family, more closely related to NFU5 than to NFU1,2, and 3. Targeted to the mitochondrion.
BnaC04G0578500ZS	0.690579	0.781915	0.331852	0.345128	0.013195	1.12108	UP	AT2G40880	FL3-27	Encodes a protein with cysteine proteinase inhibitor activity. Overexpression increases tolerance to abiotic stressors (i.e.salt,osmotic, cold stress).
BnaA03G0042800ZS	0.611776	0.653431	0.37481	0.411614	0.0132116	0.685993	UP	AT5G10960	CAF1i	Polynucleotidyl transferase, ribonuclease H-like superfamily protein
BnaC09G0374800ZS	0.523341	0.53566	0.335656	0.286433	0.0132205	0.767511	UP	AT5G54940	--	Translation initiation factor SUI1 family protein
BnaC07G0363100ZS	0.124515	0.134302	0.0648748	0.0746932	0.0132465	0.890964	UP	AT4G13290	CYP71A19	putative cytochrome P450
BnaA08G0121200ZS	0.628026	0.613691	0.364424	0.416159	0.0132838	0.669713	UP	AT4G21450	--	PapD-like superfamily protein
BnaA01G0175500ZS	1.42748	1.53888	0.243668	0.479925	0.0132942	2.03544	UP	AT4G28230	--	--
BnaC03G0293000ZS	0.369465	0.340751	0.228777	0.23274	0.0133131	0.621875	UP	AT4G08240	--	--
BnaC04G0447400ZS	0.59676	0.576537	0.280734	0.341746	0.0133453	0.914469	UP	AT2G23450	--	Protein kinase superfamily protein
BnaA05G0047000ZS	0.634434	0.659518	0.433929	0.384319	0.0133829	0.661175	UP	AT2G44670	--	Protein of unknown function (DUF581)
BnaA05G0042700ZS	1.04029	1.11711	0.693044	0.731143	0.0134027	0.599156	UP	AT2G44120	--	Ribosomal protein L30/L7 family protein
BnaA06G0081600ZS	0.868001	0.826687	0.578872	0.52321	0.0134082	0.620788	UP	AT1G63000	UER1	nucleotide-rhamnose synthase/epimerase-reductase
BnaC01G0276800ZS	0.814549	0.847088	0.247906	0.366077	0.0134128	1.43634	UP	AT3G49500	SGS2	--
BnaC09G0267600ZS	0.995807	0.906523	0.54992	0.570248	0.0134303	0.764052	UP	AT3G25780	AOC3	Encodes allene oxide cyclase, one of the enzymes involved in jasmonic acid biosynthesis. One of four genes in Arabidopsis that encode this enzyme. mRNA expression is upregulated in senescing leaves. Note: Nomenclature for Arabidopsis allene oxide cyclase 3 (AOC3, AT3G25780) gene is based on Stenzel et al. 2003 Plant Molecular Biology 51:895-911. AOC3 (AT3G25780) is also referred to as AOC2 in He …
BnaC04G0599300ZS	0.594782	0.629768	0.288312	0.347688	0.0134357	0.945156	UP	AT2G44350	CSY4	encodes a mitochrondrion targeted citrate synthase, the first enzyme of the tricarboxylic acid cycle, catalyzing the condensation of acetyl-CoA and oxaloacetate, finally yielding citrate and CoA.
BnaA09G0594000ZS	0.713739	0.76666	0.478452	0.5032	0.0134454	0.592702	UP	AT2G22240	MIPS2	** Referred to as MIPS1 in Mitsuhashi et al 2008. Myo-inositol-1-phosphate synthase isoform 2. Expressed in leaf, root and silique. Immunolocalization experiments with an antibody recognizing MIPS1, MIPS2, and MIPS3 showed endosperm localization.
BnaC06G0227100ZS	0.887209	0.859897	0.55059	0.613225	0.013447	0.586105	UP	AT3G61070	PEX11E	member of the peroxin11 (PEX11) gene family, integral to peroxisome membrane, controls peroxisome proliferation.
BnaA09G0602400ZS	0.618167	0.616583	0.175982	0.268653	0.0134827	1.47352	UP	AT2G20950	--	Arabidopsis phospholipase-like protein (PEARLI 4) family
BnaC03G0360300ZS	0.633661	0.687126	0.310557	0.364283	0.0134908	0.96878	UP	AT3G05880	RCI2A	Induced by low temperatures, dehydration and salt stress and ABA. Encodes a small (54 amino acids), highly hydrophobic protein that bears two potential transmembrane domains.
BnaA09G0194000ZS	1.01696	0.997854	0.634552	0.537504	0.0134964	0.781606	UP	AT5G44110	POP1	Encodes a member of the NAP subfamily of ABC transporters.
BnaA03G0445300ZS	0.532026	0.588425	0.310938	0.321181	0.0135002	0.825811	UP	AT4G18070	--	--
BnaA03G0139500ZS	1.03096	1.15416	0.351965	0.205885	0.0135119	1.96976	UP	AT5G51540	AtOCT1	Zincin-like metalloproteases family protein
BnaA02G0007500ZS	0.635908	0.596707	0.349193	0.391739	0.0135631	0.734308	UP	AT3G09390	MT2A	metallothionein, binds to and detoxifies excess copper and other metals, limiting oxidative damage
BnaC01G0377900ZS	0.713739	0.769438	0.316768	0.38931	0.0135703	1.07079	UP	AT3G21690	--	MATE efflux family protein
BnaC09G0299500ZS	0.896959	0.923326	0.495885	0.38896	0.0135785	1.04067	UP	AT4G10760	MTA	mRNAadenosine methylase
BnaA10G0056300ZS	0.976695	0.873416	0.489317	0.471791	0.0136023	0.944842	UP	AT1G47820	--	--
BnaC07G0390300ZS	0.653094	0.587571	0.344313	0.334563	0.0136211	0.869893	UP	AT3G50910	--	--
BnaC05G0032300ZS	0.673391	0.719335	0.423585	0.369844	0.0136347	0.811737	UP	AT1G04950	TAFII59	Encodes one of two Arabidopsis proteins with significant similarity to the histone fold TBP-associated factor TAF6. Mutants are embryo lethal and transmission of the mutant allele through the male gametophyte is significantly reduced. This is due to reduced pollen tube growth of the mutant.
BnaC07G0302000ZS	0.422212	0.389074	0.260357	0.266028	0.0136404	0.62409	UP	AT3G27000	WRM	encodes a protein whose sequence is similar to actin-related proteins (ARPs) in other organisms. its transcript level is down regulated by light and is expressed in very low levels in all organs examined.
BnaC07G0071100ZS	2.4471	2.76998	0.833601	0.509811	0.0136496	1.95734	UP	AT2G15580	--	RING/U-box superfamily protein
BnaC04G0520500ZS	0.839693	0.881356	0.527947	0.45078	0.013671	0.81431	UP	AT2G32690	GRP23	Glycine-rich protein similar in structure to GRP5. The expression of GRP23 is induced by HPA (cutin monomer, salicylic acid, and abscisic acid.
BnaA10G0007800ZS	0.906335	0.913807	0.579039	0.490693	0.0136739	0.766802	UP	AT1G01120	KCS1	Encodes a condensing enzyme KCS1 (3-ketoacyl-CoA synthase 1) which is involved in the critical fatty acid elongation process in wax biosynthesis.
BnaC06G0192200ZS	0.376234	0.346247	0.0469286	0.10706	0.0136844	2.23013	UP	AT5G38830	--	Cysteinyl-tRNA synthetase, class Ia family protein
BnaA04G0066600ZS	0.829421	0.803377	0.446913	0.52109	0.0136976	0.754263	UP	AT3G52730	--	ubiquinol-cytochrome C reductase UQCRX/QCR9-like family protein
BnaA02G0004000ZS	0.860481	0.947854	0.532903	0.536358	0.0137105	0.758048	UP	AT5G01750	--	Protein of unknown function (DUF567)
BnaA01G0011900ZS	0.818086	0.789295	0.547996	0.486637	0.0137163	0.635593	UP	AT4G37830	--	cytochrome c oxidase-related
BnaC08G0193200ZS	0.681757	0.743743	0.43722	0.40753	0.0137183	0.754872	UP	AT1G09430	ACLA-3	Encodes subunit A of the heteromeric enzyme ATP citrate lyase (ACL). In animals, ACL is encoded by a single gene; ACL in Arabidopsis is composed of two polypeptides, ACLA (encoded by 3 genes) and ACLB (encoded by 2 genes). The holoenzyme has an A(4)B(4)stoichiometry. Expression of both ACLA and ACLB but not of either of the subunits alone results in ACL activity.
BnaA06G0294800ZS	0.832695	0.87203	0.550901	0.481771	0.0137192	0.723157	UP	AT5G64470	TBL12	Encodes a member of the TBL (TRICHOME BIREFRINGENCE-LIKE) gene family containing a plant-specific DUF231 (domain of unknown function) domain. TBL gene family has 46 members, two of which (TBR/AT5G06700 and TBL3/AT5G01360) have been shown to be involved in the synthesis and deposition of secondary wall cellulose, presumably by influencing the esterification state of pectic polymers. A nomenclature…
BnaA06G0070600ZS	0.313681	0.316445	0.192369	0.159553	0.0137248	0.840383	UP	AT1G10890	--	--
BnaA02G0358000ZS	1.04876	0.989278	0.621114	0.535301	0.0137378	0.81752	UP	AT3G30725	GDU6	Encodes a member of the GDU (glutamine dumper) family proteins involved in amino acid export: At4g31730 (GDU1), At4g25760 (GDU2), At5g57685 (GDU3), At2g24762 (GDU4), At5g24920 (GDU5), At3g30725 (GDU6) and At5g38770 (GDU7).
BnaC07G0218600ZS	0.297391	0.332397	0.111147	0.0713735	0.0137446	1.78681	UP	AT5G43270	SPL2	member of the SPL (squamosa-promoter binding protein-like) gene family, a novel gene family encoding DNA binding proteins and putative transcription factors. In conjunction with SPL10 and SPL11, SPL2 redundantly controls proper development of lateral organs in association with shoot maturation in the reproductive phase.
BnaA08G0292900ZS	0.621217	0.647527	0.380502	0.428241	0.0137525	0.649647	UP	AT1G09700	HYL1	Encodes a nuclear dsRNA binding protein. Involved in mRNA cleavage. The mutant is characterized by shorter stature, delayed flowering, leaf hyponasty, reduced fertility, decreased rate of root growth, and an altered root gravitropic response. It also exhibits less sensitivity to auxin and cytokinin.
BnaA10G0199800ZS	0.655474	0.710251	0.453316	0.444926	0.0137622	0.604492	UP	AT5G16710	DHAR3	The protein undergoes thiolation following treatment with the oxidant tert-butylhydroperoxide.
BnaA07G0257200ZS	0.884278	0.804265	0.508289	0.491898	0.0137877	0.755508	UP	AT1G73080	PEPR1	Encodes a leucine-rich repeat receptor kinase. Functions as a receptor for AtPep1 to amplify innate immunity response to pathogen attacks.
BnaC08G0446500ZS	0.570991	0.65634	0.186812	0.230914	0.0137903	1.55489	UP	AT2G22240	MIPS2	** Referred to as MIPS1 in Mitsuhashi et al 2008. Myo-inositol-1-phosphate synthase isoform 2. Expressed in leaf, root and silique. Immunolocalization experiments with an antibody recognizing MIPS1, MIPS2, and MIPS3 showed endosperm localization.
BnaC07G0467100ZS	1.42748	1.5004	0.48884	0.683996	0.0138004	1.31986	UP	AT4G25760	GDU2	Encodes a member of the GDU (glutamine dumper) family proteins involved in amino acid export: At4g31730 (GDU1), At4g25760 (GDU2), At5g57685 (GDU3), At2g24762 (GDU4), At5g24920 (GDU5), At3g30725 (GDU6) and At5g38770 (GDU7).
BnaC07G0368700ZS	0.447836	0.395711	0.155279	0.184587	0.0138044	1.31151	UP	AT5G24040	AtFDA19	Protein of unknown function (DUF295)
BnaA03G0320600ZS	0.58174	0.625284	0.360951	0.315418	0.0138045	0.835572	UP	AT3G10760	--	Homeodomain-like superfamily protein
BnaA09G0188800ZS	0.464429	0.500938	0.319785	0.301388	0.0138162	0.636081	UP	AT5G42990	UBC18	ubiquitin-conjugating enzyme 18
BnaA09G0164200ZS	0.642365	0.698906	0.395335	0.421497	0.0138204	0.71549	UP	AT1G60890	PIP5K8	Phosphatidylinositol-4-phosphate 5-kinase family protein
BnaA02G0217200ZS	0.974863	0.844184	0.345196	0.294416	0.0138373	1.50791	UP	AT5G05800	--	--
BnaA01G0085500ZS	0.69633	0.661147	0.394603	0.445157	0.01386	0.69288	UP	AT4G28460	prePIP1	--
BnaA03G0198800ZS	1.22355	1.11569	0.383961	0.516842	0.0138635	1.37675	UP	AT2G40630	BTE1	Uncharacterised conserved protein (UCP030365)
BnaA03G0439400ZS	0.660249	0.726226	0.412261	0.417796	0.013865	0.740139	UP	AT4G17215	--	Pollen Ole e 1 allergen and extensin family protein
BnaA02G0226100ZS	0.982218	0.954946	0.546938	0.436779	0.0138729	0.977631	UP	AT1G77420	MAGL5	alpha/beta-Hydrolases superfamily protein
BnaA03G0000800ZS	1.3595	1.17981	0.413176	0.288239	0.013886	1.85609	UP	AT5G01910	--	--
BnaA07G0382200ZS	0.506893	0.475559	0.219484	0.269253	0.0138948	1.00733	UP	AT1G79380	RGLG4	Encodes a ubiquitin ligase that is an essential upstream modulator of JA signaling in response to various stimuli.
BnaC03G0165700ZS	0.648264	0.634637	0.320701	0.387777	0.0139028	0.856614	UP	AT5G50870	UBC27	ubiquitin-conjugating enzyme 27
BnaA10G0014400ZS	1.12667	0.993011	0.502319	0.476823	0.0139359	1.11426	UP	--	--	--
BnaA03G0113700ZS	0.550174	0.589754	0.148536	0.230304	0.0139497	1.58928	UP	AT5G57015	ckl12	casein kinase I-like 12
BnaC08G0159000ZS	0.153492	0.127355	0.0301684	0.0314883	0.0139573	2.18746	UP	AT2G24520	HA5	H(+)-ATPase 5
BnaC09G0538600ZS	0.746866	0.686256	0.39596	0.33866	0.0139609	0.96409	UP	AT5G11810	--	--
BnaC07G0529400ZS	0.872102	0.967772	0.493706	0.518573	0.013968	0.861999	UP	AT4G35985	--	Senescence/dehydration-associated protein-related
BnaC08G0286600ZS	1.01324	0.93627	0.595633	0.535301	0.0139758	0.785599	UP	AT5G08640	FLS1	Encodes a flavonol synthase that catalyzes formation of flavonols from dihydroflavonols. Co-expressed with CHI and CHS (qRT-PCR).
BnaC07G0213200ZS	0.65988	0.70777	0.318483	0.233623	0.0139768	1.30868	UP	AT5G66620	DAR6	DA1-related protein 6
BnaA02G0292900ZS	0.58292	0.637606	0.355149	0.376024	0.0140081	0.739219	UP	AT5G45340	CYP707A3	Encodes a protein with ABA 8'-hydroxylase activity; involved in ABA catabolism. Mutant analyses show that disruption in the gene results in more drought tolerance whereas overexpression results in increased transpiration rate and reduced drought tolerance. Gene involved in postgermination growth. Plant P450 CYP707A3, ABA 8'-hydroxylase, binds enantioselectively (+)-ABA but not (-)-ABA, whereas th…
BnaA01G0070600ZS	0.939674	1.02528	0.619163	0.590096	0.0140124	0.700374	UP	AT4G30280	XTH18	Encodes a xyloglucan endotransglucosylase/hydrolase with only only the endotransglucosylase (XET; EC 2.4.1.207) activity towards xyloglucan and non-detectable endohydrolytic (XEH; EC 3.2.1.151) activity. Expressed in the mature or basal regions of both the main and lateral roots, but not in the tip of these roots where cell division occurs.
BnaC03G0463700ZS	0.688429	0.718142	0.479952	0.428241	0.01402	0.631112	UP	AT3G23920	TR-BAMY	Encodes a chloroplast beta-amylase. Is necessary for leaf starch breakdown in the absence of BAM3.
BnaC07G0362100ZS	0.58368	0.562024	0.216594	0.289955	0.0140214	1.17746	UP	AT5G24850	CRY3	Binds flavin adenine dinucleotide and DNA. It does not have photolyase activity, and it is likely to act as photoreceptor. Closely related to Synechocystis cryptochrome.
BnaC05G0491700ZS	0.61323	0.641507	0.395394	0.437259	0.0140254	0.591599	UP	AT3G10985	WI12	A senescence-associated gene whose expression is induced in response to treatment with Nep1, a fungal protein that causes necrosis.
BnaA02G0068900ZS	0.425914	0.407802	0.20398	0.149386	0.0140375	1.23839	UP	AT5G17280	--	--
BnaC09G0087300ZS	0.728455	0.733093	0.505191	0.444009	0.0140402	0.622713	UP	AT5G65210	TGA1	Encodes TGA1, a redox-controlled regulator of systemic acquired resistance. TGA1 targets the activation sequence-1 (as-1) element of the promoter region of defense proteins. TGA1 are S-nitrosylated.
BnaA04G0158300ZS	0.529134	0.519556	0.309939	0.252501	0.0140403	0.898819	UP	AT2G24040	--	Low temperature and salt responsive protein family
BnaC01G0002400ZS	0.68304	0.692494	0.431957	0.363074	0.014044	0.79091	UP	AT4G38920	VHA-C3	vacuolar-type H(+)-ATPase C3
BnaA04G0260200ZS	0.580275	0.599417	0.33309	0.266219	0.0140606	0.977039	UP	AT2G40765	--	--
BnaC06G0356500ZS	0.514828	0.564255	0.316768	0.288893	0.0140646	0.833223	UP	--	--	--
BnaA08G0309800ZS	0.707638	0.656047	0.402245	0.437974	0.0140693	0.698674	UP	AT1G05790	--	lipase class 3 family protein
BnaC08G0492100ZS	0.671543	0.631555	0.444035	0.40752	0.0140792	0.613774	UP	AT1G14320	SAC52	Encodes a ribosomal protein L10 and may be involved in translation regulation. Semi-dominant mutations in SAC552 can suppress defects in acaulis5, which encodes a thermospermine synthase, by enhancing translation of acl5 and itself.
BnaC09G0088700ZS	1.14198	1.03195	0.580742	0.619822	0.0140867	0.856596	UP	AT5G65500	PUB50	U-box domain-containing protein kinase family protein
BnaA09G0631000ZS	0.664131	0.622155	0.402651	0.436127	0.0140908	0.616851	UP	AT1G14780	MACP1	MAC/Perforin domain-containing protein
BnaC03G0067100ZS	0.925697	0.84493	0.442646	0.500606	0.0141315	0.908547	UP	AT5G14330	--	--
BnaC06G0209800ZS	0.665709	0.59961	0.302557	0.338161	0.0141427	0.98174	UP	AT3G57930	--	--
BnaC06G0186000ZS	1.26887	1.15416	0.633536	0.535301	0.0141924	1.05174	UP
BnaC02G0369900ZS	0.565847	0.64728	0.255174	0.219386	0.0141968	1.35407	UP	AT4G10140	--	--
BnaC02G0203200ZS	0.478896	0.483136	0.319968	0.276067	0.014213	0.690686	UP	AT1G66070	--	Translation initiation factor eIF3 subunit
BnaA03G0082900ZS	1.152	1.32343	0.527947	0.524805	0.0142163	1.23352	UP	AT5G42330	--	--
BnaC07G0525800ZS	0.87534	0.788861	0.475995	0.465429	0.0142202	0.821913	UP	AT4G35310	CPK5	calmodulin-domain protein kinase CDPK isoform 5 (CPK5)
BnaC07G0539900ZS	0.735944	0.727798	0.351965	0.433339	0.0142214	0.898338	UP	AT4G37710	VQ29	VQ motif-containing protein
BnaC05G0140500ZS	0.616505	0.664964	0.401838	0.362623	0.014229	0.745282	UP	AT1G16870	--	mitochondrial 28S ribosomal protein S29-related
BnaA05G0367400ZS	0.658358	0.737726	0.370897	0.356	0.0142519	0.941563	UP	AT3G19240	DEM2	Vacuolar import/degradation, Vid27-related protein
BnaC07G0140000ZS	0.599188	0.619048	0.345565	0.399208	0.0142839	0.709921	UP	AT1G29400	ML5	A member of mei2-like gene family, predominantly plant-based family of genes encoding RNA binding proteins with characteristic presence of a highly conserved RNA binding motif first described in the mei2 gene of the fission yeast S. pombe. In silico analyses reveal nine mei2 -like genes in A. thaliana. They were grouped into four distinct clades, based on overall sequence similarity and subfamily…
BnaA01G0094300ZS	0.523408	0.495443	0.23249	0.286109	0.0143007	0.974251	UP	AT4G18460	--	D-Tyr-tRNA(Tyr) deacylase family protein
BnaC08G0199100ZS	0.622337	0.633333	0.333121	0.252781	0.0143436	1.09972	UP	AT1G10090	--	Early-responsive to dehydration stress protein (ERD4)
BnaC08G0402000ZS	0.774057	0.838803	0.516755	0.536781	0.0143664	0.614382	UP	AT3G61260	REM1.2	Remorin family protein
BnaA02G0370200ZS	0.559795	0.611757	0.358059	0.331222	0.0143888	0.765257	UP	AT5G28020	CYSD2	Encodes cysteine synthase CysD2.
BnaC06G0282000ZS	0.727734	0.623869	0.250551	0.240885	0.0143901	1.45959	UP	AT4G09550	GIP1a	Encodes a gamma-tubulin complex protein that plays a role in gamma-tubulin complex localization, spindle stability and chromosomal segregation.
BnaC07G0205200ZS	1.40708	1.24576	0.664485	0.657656	0.0144069	1.00466	UP	AT5G67310	CYP81G1	member of CYP81G
BnaA06G0384700ZS	0.703322	0.738956	0.496959	0.448256	0.0144214	0.609635	UP	AT3G27210	--	--
BnaA02G0253600ZS	1.08227	0.991217	0.461195	0.552205	0.0144295	1.03286	UP	AT4G02370	--	Protein of unknown function, DUF538
BnaC01G0299400ZS	0.739331	0.729902	0.49072	0.424031	0.0144361	0.683612	UP	AT3G46060	RABE1c	small GTP-binding protein (ara-3)
BnaC07G0502200ZS	0.422956	0.461663	0.284279	0.278357	0.0144693	0.652855	UP	AT4G31115	--	Protein of unknown function (DUF1997)
BnaA09G0550400ZS	0.791978	0.812249	0.430179	0.508536	0.01447	0.773119	UP	AT3G60520	--	--
BnaC09G0026400ZS	0.82749	0.824508	0.497399	0.568624	0.0144798	0.631973	UP	AT3G28180	CSLC4	encodes a gene similar to cellulose synthase
BnaA08G0070000ZS	0.620993	0.649748	0.397991	0.441836	0.0144848	0.597506	UP	AT1G33990	MES14	Encodes a protein predicted to act as a carboxylesterase. It has similarity to the SABP2 methyl salicylate esterase from tobacco. This protein does not act on methyl IAA, methyl JA, MeSA, MeGA4, or MEGA9 in vitro.
BnaC04G0228600ZS	0.25138	0.297342	0.0555734	0.0209922	0.0145181	2.84131	UP	AT1G59900	IAR4L	encodes the e1 alpha subunit of the pyruvate dehydrogenase complex (PDC)
BnaA07G0196600ZS	0.704927	0.800216	0.364101	0.356867	0.0145281	1.06189	UP	AT3G56750	--	--
BnaA10G0245000ZS	0.606547	0.722088	0.193685	0.175357	0.0145391	1.84809	UP	AT5G10100	TPPI	Haloacid dehalogenase-like hydrolase (HAD) superfamily protein
BnaA03G0528500ZS	0.779448	0.717388	0.344708	0.410507	0.0145506	0.986957	UP	AT4G31800	WRKY18	Pathogen-induced transcription factor. Binds W-box sequences in vitro. Forms protein complexes with itself and with WRKY40 and WRKY60. Constitutive expression of WRKY18 enhanced resistance to P. syringae, but its coexpression with WRKY40 or WRKY60 made plants more susceptible to both P. syringae and B. cinerea. WRKY18, WRKY40, and WRKY60 have partially redundant roles in response to the hemibiotr…
BnaC03G0632500ZS	0.568722	0.577738	0.37937	0.326339	0.0145707	0.70004	UP	AT1G25275	--	--
BnaC04G0405000ZS	0.812495	0.746519	0.5113	0.501504	0.0145862	0.622278	UP	AT2G44860	RPL24C	Ribosomal protein L24e family protein
BnaA01G0081600ZS	0.608272	0.589018	0.351965	0.286403	0.014619	0.907313	UP	AT4G28940	--	Phosphorylase superfamily protein
BnaC08G0487800ZS	0.827025	0.903422	0.554689	0.540927	0.0146253	0.659401	UP	AT1G14870	PCR2	PCR2 encodes a membrane protein involved in zinc transport and detoxification.
BnaA08G0284000ZS	0.751304	0.831664	0.428355	0.377631	0.0146313	0.973807	UP	AT1G11475	NRPE10	Non-catalytic subunit common to nuclear DNA-dependent RNA polymerases II, IV and V; homologous to budding yeast RPB10.
BnaA09G0004700ZS	0.726212	0.77365	0.518685	0.479795	0.0146403	0.587024	UP	AT4G00570	NAD-ME2	Encodes an NAD-dependent malic enzyme (NAD-ME) that does not act on oxaloacetate, indicating that it belongs to EC 1.1.1.39. It is a member of the beta family of NAD-MEs in plants. It appears to function as a homodimer or as a heterodimer with the alpha-type NAD-ME2 (At2g13560). NAD-ME2 transcript and protein levels are higher during the night than during the day.
BnaC07G0394400ZS	0.615775	0.656587	0.326824	0.382358	0.0146468	0.84328	UP	--	--	--
BnaA06G0415800ZS	0.778624	0.816788	0.381919	0.273345	0.0146562	1.28378	UP	AT5G47520	RABA5a	RAB GTPase homolog A5A
BnaA08G0166800ZS	1.39088	1.26188	0.579039	0.689123	0.0146719	1.06475	UP	AT4G27595	--	Plant protein of unknown function (DUF827)
BnaC08G0422500ZS	0.455629	0.484582	0.292324	0.253686	0.0146721	0.784058	UP	AT2G26300	GPA1	Encodes an alpha subunit of a heterotrimeric GTP-binding protein. The active GTP-bound form of GPA1 binds to the GTG1 and GTG2 abscisic acid (ABA) receptors and appears to affect their GTPase and GTP-binding activity, and hence, ABA binding abilities. GPA1 is a positive regulator in ABA-mediated inhibition of stomatal opening. Plants with recessive mutant alleles have complex phenotypes including…
BnaC03G0483100ZS	0.716212	0.767538	0.483332	0.437243	0.014674	0.688641	UP	AT2G12400	--	--
BnaC06G0195000ZS	0.490979	0.531228	0.33344	0.345574	0.0146747	0.590175	UP	AT3G55560	AHL15	AT-hook protein of GA feedback 2
BnaC06G0378400ZS	0.605068	0.651198	0.24351	0.315429	0.0146829	1.16838	UP	AT1G71110	--	--
BnaA02G0341100ZS	0.822614	0.832392	0.443476	0.526804	0.0146841	0.770364	UP	AT3G27030	--	--
BnaC09G0520600ZS	0.605596	0.633138	0.422358	0.375937	0.0146886	0.633874	UP	AT5G14105	--	--
BnaA01G0015800ZS	0.713739	0.605459	0.219978	0.19826	0.0146944	1.65727	UP	AT4G37290	prePIP2	--
BnaA09G0260400ZS	0.617194	0.666846	0.406803	0.430045	0.0146985	0.617652	UP	AT4G09830	--	Uncharacterised conserved protein UCP009193
BnaA05G0007600ZS	0.702355	0.739299	0.31408	0.395843	0.0147039	1.02199	UP	AT2G47060	PTI1-4	Encodes Pto-interacting 1-4 (PTI1-4), a member of the PTI1-like serine/threonine protein kinases that share strong sequence identity to the tomato PTI1 kinase.
BnaA08G0310900ZS	0.92128	0.850908	0.393865	0.478954	0.0147408	1.02178	UP	AT1G05500	SYTE	Encodes a endomembrane-localized synaptotagmin. Synaptotagmin family proteins are calcium sensors that regulate exocytosis in mammalian cells.
BnaA08G0268900ZS	0.990976	0.923326	0.527947	0.597365	0.0147596	0.766493	UP	AT1G15280	BTZ2	CASC3/Barentsz eIF4AIII binding
BnaC06G0403300ZS	0.674716	0.607932	0.296549	0.232379	0.0147658	1.27798	UP	AT1G73990	SPPA1	Encodes a putative protease SppA (SppA).
BnaA05G0143800ZS	0.847005	0.919873	0.589119	0.581986	0.0147688	0.593332	UP	AT5G36230	--	ARM repeat superfamily protein
BnaC01G0077100ZS	0.592538	0.553995	0.29697	0.231482	0.0147806	1.11743	UP	AT4G31020	ABAPT8	alpha/beta-Hydrolases superfamily protein
BnaC01G0114800ZS	1.38318	1.24642	0.609144	0.697463	0.0148066	1.00902	UP	AT4G18422	--	--
BnaA03G0080600ZS	0.899106	0.85928	0.463723	0.546739	0.0148195	0.799237	UP	AT5G18800	--	Cox19-like CHCH family protein
BnaC04G0282000ZS	1.16101	1.16115	0.674599	0.78125	0.0148197	0.673611	UP	AT3G59820	LETM1	LETM1-like protein
BnaC02G0428000ZS	0.484872	0.442586	0.285971	0.293141	0.0148232	0.679438	UP	AT2G01600	PICALM1a	ENTH/ANTH/VHS superfamily protein
BnaA05G0115100ZS	1.34817	1.43115	0.731004	0.568757	0.0148337	1.09649	UP	AT2G32180	PTAC18	plastid transcriptionally active 18
BnaC05G0503100ZS	0.567417	0.593857	0.339395	0.277814	0.0148358	0.911877	UP	AT3G09560	PAH1	The PAH1 gene encodes a phosphatidate phosphohydrolase. Mutant analysis revealed its involvement in galactolipid synthesis pathway, and the membrane lipid remodeling. The pah1pah2 double-mutant showed enhanced Al-susceptibility under low-P conditions, but there was no significant differences in Al tolerance between pah1pah2 and wild type when they were grown in a solution containing 35 &#956;M Pi.
BnaC08G0456400ZS	0.636684	0.654375	0.360446	0.282575	0.0148472	1.00562	UP	AT2G20950	--	Arabidopsis phospholipase-like protein (PEARLI 4) family
BnaA05G0460300ZS	0.899931	0.983342	0.48354	0.391182	0.0148868	1.10635	UP	AT3G07195	--	RPM1-interacting protein 4 (RIN4) family protein
BnaA03G0363200ZS	0.593604	0.646441	0.367373	0.325219	0.0149041	0.840316	UP	AT3G20410	CPK9	calmodulin-domain protein kinase CDPK isoform 9 (CPK9)
BnaC01G0035200ZS	0.600557	0.62954	0.371518	0.417611	0.0149056	0.640439	UP	AT4G35360	--	Uncharacterised conserved protein (UCP030210)
BnaA10G0099400ZS	1.05674	1.00441	0.705076	0.632629	0.0149201	0.623692	UP	AT5G53480	KPNB1	ARM repeat superfamily protein
BnaA05G0384300ZS	0.522814	0.577079	0.315042	0.285753	0.0149241	0.872419	UP	AT3G17410	CARK1	Protein kinase superfamily protein
BnaA01G0030700ZS	0.669784	0.689334	0.43358	0.367404	0.0149432	0.762827	UP	AT4G35310	CPK5	calmodulin-domain protein kinase CDPK isoform 5 (CPK5)
BnaC05G0141700ZS	0.465012	0.538607	0.168331	0.196892	0.0149494	1.45836	UP	AT1G16930	--	F-box/RNI-like/FBD-like domains-containing protein
BnaA07G0187900ZS	0.882018	0.819333	0.549559	0.581797	0.0149512	0.588628	UP	AT3G54300	VAMP727	Encodes a member of Synaptobrevin -like protein family. VAMP727 is a R-SNARE and interacts with SYP22/VTI11/SYP51. It is required for trafficking of storage proteins to the protein storage vacuoles (PSV) and also for PSV organization and biogenesis. Loss of function mutations have no phenotype but double mutants with SYP22 are embryo lethal.
BnaA03G0160800ZS	0.609652	0.646328	0.26664	0.338329	0.0149577	1.05388	UP	AT2G33360	--	Protein of unknown function (DUF3527)
BnaA09G0428900ZS	1.17747	1.06084	0.596385	0.638763	0.0149579	0.857726	UP	AT1G27670	--	--
BnaA08G0013300ZS	0.456164	0.41266	0.130964	0.183907	0.0149595	1.4643	UP	AT5G41010	NRPE12	Non-catalytic subunit common to nuclear DNA-dependent RNA polymerases II, IV and V; homologous to budding yeast RPB12.
BnaC01G0032500ZS	0.610108	0.635435	0.331261	0.390855	0.0149613	0.786473	UP	AT4G35770	SEN1	Senescence-associated gene that is strongly induced by phosphate starvation. Transcripts are differentially regulated at the level of mRNA stability at different times of day. mRNAs are targets of the mRNA degradation pathway mediated by the downstream (DST) instability determinant.
BnaC08G0035300ZS	0.751667	0.819289	0.425764	0.473965	0.0149634	0.804081	UP	AT1G49600	RBP47A	RNA-binding protein 47A
BnaA07G0037400ZS	0.951652	0.923326	0.412056	0.524666	0.0149732	1.00118	UP	AT4G39260	RBGA6	Encodes a glycine-rich protein with RNA binding domain at the N-terminus. Protein is structurally similar to proteins induced by stress in other plants. Gene expression is induced by cold. Transcript undergoes circadian oscillations that is depressed by overexpression of AtGRP7. A substrate of the type III effector HopU1 (mono-ADP-ribosyltransferase).
BnaC04G0602100ZS	0.951652	0.960259	0.478836	0.343771	0.0150879	1.21674	UP	AT2G44900	FBX5	ARABIDILLO-1 and its homolog, ARABIDILLO -2, are unique among Arabidopsis Arm-repeat proteins in having an F-box motif and fall into a phylogenetically distinct subgroup from other plant Arm-repeat proteins Similar to arm repeat protein in rice and armadillo/beta-catenin repeat family protein / F-box family protein in Dictyostelium. ARABIDILLO-1 promote lateral root development. Mutant plants for…
BnaA08G0252300ZS	0.523728	0.578801	0.328722	0.313101	0.0150912	0.78057	UP	AT1G19270	DA1	DA1
BnaA03G0285300ZS	0.330325	0.301227	0.173572	0.189823	0.0150989	0.797364	UP	AT3G01090	SNRK1.1	encodes a SNF1-related protein kinase that physically interacts with SCF subunit SKP1/ASK1 and 20S proteosome subunit PAD1. It can also interact with PRL1 DWD-containing protein. Based on in vitro degradation assays and cul4cs and prl1 mutants, there is evidence that AKIN10 is degraded in a proteasome-dependent manner, and that this depends on a CUL4-PRL1 E3 ligase
Bnascaffold0292G0000100ZS	0.678357	0.716677	0.429924	0.476967	0.0151008	0.621298	UP	AT2G03760	SULT202A1	Encodes a brassinosteroid sulfotransferase. In vitro experiements show that this enzyme has a preference for 24-epibrassinosteroids, particularly 24-epicathasterone, but does not act on castasterone and brassinolide. It also shows sulfating activity toward flavonoids. It is differentially expressed during development, being more abundant in young seedlings and actively growing cell cultures. Expr…
BnaA09G0640200ZS	0.543399	0.569824	0.279381	0.335425	0.0151054	0.856541	UP	AT1G13520	--	Protein of unknown function (DUF1262)
BnaC01G0376800ZS	0.531154	0.489699	0.294107	0.322525	0.0151104	0.727294	UP	AT3G21810	AtC3H40	Zinc finger C-x8-C-x5-C-x3-H type family protein
BnaA03G0411000ZS	0.534261	0.551743	0.373204	0.328768	0.0151117	0.629545	UP	AT5G61560	PUB51	U-box domain-containing protein kinase family protein
BnaA02G0294500ZS	1.18663	1.3238	0.707503	0.683996	0.0151212	0.851296	UP	--	--	--
BnaA01G0321600ZS	0.519748	0.569632	0.339506	0.32038	0.0151229	0.72322	UP	AT3G19290	AtAREB2	bZIP transcription factor with specificity for abscisic acid-responsive elements (ABRE). Mediate ABA-dependent stress responses.
BnaA09G0664800ZS	0.541135	0.49244	0.202192	0.254905	0.0151451	1.17707	UP	AT1G08820	VAP27-2	Encodes VAP33-like protein that interacts with cowpea mosaic virus protein 60K. Is a SNARE-like protein that may be involved in vesicular transport to or from the ER.
BnaA01G0380900ZS	0.807672	0.763368	0.447448	0.363835	0.01516	0.953444	UP	AT3G10300	--	Calcium-binding EF-hand family protein
BnaC07G0495100ZS	0.686279	0.700409	0.389961	0.455846	0.015168	0.713243	UP	AT4G30210	ATR2	Encodes NADPH-cytochrome P450 reductase that catalyzes the first oxidative step of the phenylpropanoid general pathway.
BnaC02G0280100ZS	0.954979	0.908553	0.578711	0.643808	0.0152048	0.608182	UP	AT1G74020	SS2	Encodes AtSS-2 strictosidine synthase.
BnaA05G0361100ZS	0.553199	0.602673	0.37552	0.38131	0.0152271	0.610939	UP	AT5G41690	--	RNA-binding (RRM/RBD/RNP motifs) family protein
BnaC03G0071900ZS	0.541782	0.517622	0.316136	0.260857	0.0152811	0.876626	UP	AT5G15270	AtKH25	RNA-binding KH domain-containing protein
BnaC01G0477000ZS	0.960802	1.04676	0.658092	0.632629	0.0152845	0.637271	UP	AT3G10520	PGB2	Encodes a class 2 non-symbiotic hemoglobin. Over-expression of AHb2 in seeds led to a 40% increase in the total fatty acid content of developing and mature seeds in three subsequent generations. This was mainly due to an increase in the poly-unsaturated C18:2 (omega-6) linoleic and C18:3 (omega-3) alpha-linolenic acids.
BnaC07G0460100ZS	1.01617	0.938099	0.609588	0.54756	0.0152899	0.756056	UP	AT4G24830	--	arginosuccinate synthase family
BnaC09G0610400ZS	0.813509	0.923326	0.387161	0.424042	0.0153045	1.09832	UP	AT5G03460	--	--
BnaA09G0462700ZS	0.543801	0.636481	0.221315	0.199864	0.0153444	1.48662	UP	AT1G22280	PAPP2C	Encodes a phytochrome-associated protein, PAPP2C (phytochrome-associated protein phosphatase type 2C). PAPP2C interacts in the nucleus with phyA (phytochrome A) and phyB. Functions as a regulator of phytochrome-interacting factor PIF3 by dephosphorylating phytochromes in the nucleus.
BnaC08G0271100ZS	0.860147	0.792566	0.534582	0.495485	0.0153619	0.682097	UP	AT1G22065	--	--
BnaA07G0089500ZS	0.334364	0.296783	0.114771	0.142747	0.015362	1.2933	UP	AT5G16540	ZFN3	Encodes a zinc finger protein.
BnaA07G0373500ZS	0.378498	0.43858	0.170305	0.156673	0.0154374	1.32127	UP	AT1G78230	--	Outer arm dynein light chain 1 protein
BnaC05G0489100ZS	0.751069	0.855337	0.391763	0.379891	0.0154395	1.05781	UP	AT3G11320	--	Nucleotide-sugar transporter family protein
BnaA08G0028500ZS	0.73667	0.680193	0.409237	0.450636	0.0154406	0.720504	UP	AT1G49970	SVR2	Encodes a ClpP-related sequence. Though similar to ClpP proteins, this does not contains the highly conserved catalytic triad of Ser-type proteases (Ser-His-Asp). The name reflects nomenclature described in Adam et. al (2001).
BnaC09G0220200ZS	0.74104	0.783428	0.483951	0.531892	0.0154629	0.585628	UP	AT5G43700	IAA4	Auxin inducible protein similar to transcription factors.
BnaC01G0055200ZS	0.647382	0.719393	0.396283	0.39842	0.0154917	0.782288	UP	AT4G33050	IQM1	Encodes a calmodulin-binding protein involved in stomatal movement.
BnaC09G0528900ZS	0.496135	0.470766	0.259912	0.201497	0.0155052	1.06732	UP	AT5G13190	GILP	Encodes a plasma membrane localized LITAF domain protein that interacts with LSD1 and acts as a negative regulation of hypersensitive cell death.
BnaA03G0087300ZS	0.620015	0.580198	0.413615	0.381665	0.0155251	0.593757	UP	AT5G20180	--	Ribosomal protein L36
BnaC06G0320800ZS	0.817388	0.900127	0.518072	0.481244	0.0155319	0.78131	UP	AT1G67360	SRP1	Rubber elongation factor protein (REF)
BnaC02G0008700ZS	0.621267	0.659983	0.41119	0.359688	0.015566	0.732977	UP	AT5G03200	LUL1	Paralog of LOG2 (At3g09770), a ubiquitin ligase that regulates amino acid export.
BnaC02G0098600ZS	0.670482	0.720953	0.413176	0.35235	0.0155747	0.86205	UP	AT5G19960	--	RNA-binding (RRM/RBD/RNP motifs) family protein
BnaC04G0311800ZS	0.336378	0.299983	0.170983	0.156821	0.015644	0.957015	UP	AT3G56050	--	Protein kinase family protein
BnaC05G0211500ZS	0.762532	0.716827	0.416885	0.475491	0.0156558	0.729248	UP	AT1G70140	FORMIN 8	Encodes a group I formin. Binds to F-actin barbed ends. Has severing actin filaments activity. Binds profilin. Involved in the initiation and tip growth of root hairs through regulation of actin cytoskeleton.
BnaC09G0529900ZS	0.710675	0.730235	0.375429	0.45078	0.0156628	0.802402	UP	AT5G13080	WRKY75	WRKY75 is one of several transcription factors induced during Pi deprivation. It is nuclear localized and regulated differentially during Pi starvation. RNAi mediated suppression of WRKY75 made the plants more susceptible to Pi stress as indicated by the higher accumulation of anthocyanin during Pi starvation.
BnaC04G0103600ZS	0.680057	0.631316	0.444806	0.414815	0.0156716	0.609305	UP	AT2G36130	Cyclophilin	Cyclophilin-like peptidyl-prolyl cis-trans isomerase family protein
BnaC03G0660700ZS	0.467706	0.461663	0.305558	0.259778	0.0157124	0.71714	UP	AT1G29850	PDCD5	double-stranded DNA-binding family protein
BnaC02G0460200ZS	0.765697	0.688383	0.412028	0.378574	0.0157416	0.879083	UP	AT3G27210	--	--
BnaA08G0002700ZS	0.809916	0.769438	0.448449	0.515327	0.0157472	0.712564	UP	AT1G55805	BolA2	BolA-like family protein
BnaC03G0365600ZS	0.772477	0.860939	0.434494	0.379312	0.0157997	1.00514	UP	AT3G66654	CYP21-4	Cyclophilin-like peptidyl-prolyl cis-trans isomerase family protein
BnaC02G0270200ZS	0.391609	0.41686	0.279406	0.255423	0.0158138	0.596116	UP	AT1G72830	NF-YA3	Encodes a subunit of CCAAT-binding complex, binds to CCAAT box motif present in some plant promoter sequences. One of three members of this class (HAP2A, HAP2B, HAP2C), it is expressed in vegetative and reproductive tissues. Expression is upregulated in the shoot of cax1/cax3 mutant.
BnaA04G0290100ZS	0.761321	0.642314	0.226263	0.237912	0.0158174	1.59643	UP	AT5G65850	--	F-box and associated interaction domains-containing protein
BnaC08G0061300ZS	0.577458	0.602169	0.29917	0.360566	0.0158215	0.838372	UP	AT1G47128	RD21A	cysteine proteinase precursor-like protein/ dehydration stress-responsive gene (RD21). Has been shown to have peptide ligase activity and protease activity in vitro. RD21 is involved in immunity to the necrotrophic fungal pathogen Botrytis cinerea.
BnaC03G0535000ZS	0.724266	0.672422	0.471381	0.43705	0.0158344	0.620561	UP	AT5G64060	NAC103	NAC domain containing protein 103
BnaC01G0366400ZS	0.458832	0.481735	0.275206	0.223853	0.0158356	0.914319	UP	AT3G22942	AtGG2	heterotrimeric G-protein gamma subunit 2(AGG2)
BnaA06G0297800ZS	0.297391	0.341972	0.113871	0.13571	0.0158366	1.35713	UP	AT5G64780	--	Uncharacterised conserved protein UCP009193
BnaC01G0358000ZS	0.239488	0.212023	0.0779519	0.0995909	0.0159011	1.3466	UP	AT3G26744	SCRM	Encodes a MYC-like bHLH transcriptional activator that binds specifically to the MYC recognition sequences in the CBF3 promoter. Mutants are defective in cold-regulated gene expression. Cold stress triggers protein degradation of nuclear GFPICE1 protein, and the RING finger protein HOS1 is required. Sumoylation of ICE1 controls CBF3/DREB1A expression and freezing tolerance.
BnaC09G0292500ZS	0.837584	0.778367	0.512419	0.454404	0.0159215	0.74106	UP	AT4G11570	AtPyrP2	Haloacid dehalogenase-like hydrolase (HAD) superfamily protein
BnaC02G0418600ZS	0.411909	0.434857	0.255347	0.286768	0.0159231	0.643363	UP	AT5G47520	RABA5a	RAB GTPase homolog A5A
BnaA09G0677900ZS	0.917664	1.00619	0.613682	0.616667	0.0159239	0.644931	UP	AT1G06090	ADS1.2	Fatty acid desaturase family protein
BnaA07G0000200ZS	0.590265	0.527615	0.312858	0.294962	0.0159291	0.87905	UP	AT2G20840	SCAMP3	Secretory carrier membrane protein (SCAMP) family protein
BnaC02G0553800ZS	0.82873	0.807373	0.47638	0.378896	0.0159452	0.935801	UP	AT5G66920	sks17	SKU5 similar 17
BnaA02G0156100ZS	0.837584	0.774693	0.523356	0.551119	0.0159501	0.585467	UP	AT1G65290	mtACP2	Encodes a member of the mitochondrial acyl carrier protein (ACP) family. As part of the mitochondrial matrix, it is likely to be involved in fatty acid or lipoic acid biogenesis.
BnaA08G0180800ZS	0.864127	0.959133	0.493246	0.530822	0.0159524	0.83221	UP	AT4G23690	DIR6	Encodes a homodimeric all-beta dirigent protein in the superfamily of calycins. Dirigent proteins impart stereoselectivity on the phenoxy radical coupling reaction yielding optically active lignans from two molecules of coniferyl alcohol.
BnaC02G0014000ZS	0.923191	1.01093	0.590392	0.619908	0.015965	0.676311	UP	AT5G03860	MLS	Encodes a protein with malate synthase activity.
BnaC09G0486200ZS	0.484804	0.507829	0.227742	0.152943	0.0159654	1.38266	UP	AT5G17880	CSA1	Encodes a TIR-NBS-LRR protein CSA1 that functions in photomorphogenic development. csa1 mutants display a constitutive shade-avoidance (CSA) phenotype (long stem) under high red:far-red rations (i.e. in the absence of a shade signal). csa1 mutation can be complemented by RPS4, a TIR-NBS-LRR protein that confers resistance against bacterium Pseudomonas syringae.
BnaA01G0216500ZS	0.51261	0.569847	0.283492	0.30904	0.0159767	0.869346	UP	AT3G49780	PSK4	Phytosulfokine 3 precursor, coding for a unique plant peptide growth factor. Plants overexpressing this gene (under a 35S promoter), develop normal cotyledons and hypocotyls but their growth, in particular that of their roots, was faster than that of wildtype.
BnaC08G0173700ZS	0.737965	0.678412	0.419716	0.455171	0.0159908	0.695037	UP	AT4G27657	--	--
BnaC02G0196000ZS	0.652442	0.673778	0.32459	0.398767	0.0159993	0.874542	UP	AT5G50410	--	--
BnaA01G0015500ZS	1.27226	1.13835	0.649781	0.683146	0.0160068	0.854799	UP	AT4G37310	CYP81H1	member of CYP81H
BnaA05G0428200ZS	0.581565	0.597446	0.219148	0.301965	0.0160347	1.17791	UP	AT3G12080	EngA-1	GTP-binding family protein
BnaA06G0136700ZS	0.471662	0.467127	0.290753	0.331128	0.0160411	0.594163	UP	AT1G19530	RGAT1	--
BnaA08G0267400ZS	0.647404	0.682105	0.382951	0.43816	0.0160561	0.695243	UP	AT1G15690	VHP1	--
BnaA03G0087200ZS	0.86799	0.820734	0.478672	0.383801	0.0160597	0.969383	UP	AT5G20170	MED17	--
BnaA05G0490100ZS	0.877012	0.951882	0.586608	0.535301	0.0160849	0.705016	UP	AT4G14980	--	Cysteine/Histidine-rich C1 domain family protein
BnaA05G0386600ZS	0.693178	0.811715	0.293304	0.287235	0.016091	1.3742	UP	--	--	--
BnaC08G0475300ZS	0.750598	0.71173	0.482039	0.421752	0.0160957	0.694206	UP	AT1G17120	CAT8	Encodes a member of the cationic amino acid transporter (CAT) subfamily of amino acid polyamine choline transporters. Does not mediate efficient uptake of basic amino acids in yeast or Xenopus systems but can transport neutral and acidic amino acid analogs.
BnaC03G0178000ZS	1.07282	1.13684	0.634516	0.514226	0.0160996	0.943775	UP	AT2G25735	--	--
BnaC04G0149800ZS	0.68178	0.607938	0.34382	0.359064	0.0161106	0.875698	UP	AT2G32020	--	Acyl-CoA N-acyltransferases (NAT) superfamily protein
BnaC08G0315400ZS	0.951652	1.07721	0.527947	0.524377	0.0161461	0.947094	UP	--	--	--
BnaC03G0117100ZS	0.663272	0.746808	0.136875	0.240339	0.0161745	1.90232	UP	AT5G59480	--	Haloacid dehalogenase-like hydrolase (HAD) superfamily protein
BnaC06G0210700ZS	0.650684	0.703779	0.436528	0.395129	0.0161829	0.70366	UP	AT2G45140	PVA12	Encodes a Plant VAMP-Associated protein that localizes to the ER and binds to the sitosterol-binding protein ORP3a. The WFDE motif in ORP3a appears to be important for this direct interaction. Mutation of this motif causes ORP3a to relocalize to the Golgi and cytosol. The interaction between PVA12 and ORP3a does not appear to be sterol-dependent.
BnaA10G0197600ZS	0.659668	0.574602	0.281572	0.251129	0.0161831	1.21226	UP	AT5G17060	ATARFB1B	A member of ARF GTPase family. A thaliana has 21 members of this family, known to be essential for vesicle coating and uncoating and functions in GTP-binding. Gene encoding ADP-ribosylation factor and similar to ADP-ribosylation factor 1; ARF 1 (GP:385340) {Drosophila melanogaster), other ARFs and ARF-like proteins.
BnaA09G0159400ZS	0.800097	0.797181	0.491933	0.40114	0.0162358	0.838765	UP	AT2G41730	HRG1	--
BnaA03G0134900ZS	0.843236	0.995461	0.334796	0.319122	0.0162769	1.4915	UP	AT5G52380	--	VASCULAR-RELATED NAC-DOMAIN 6
BnaA08G0079000ZS	0.516611	0.589903	0.243668	0.199182	0.0162826	1.32113	UP	AT5G35110	--	--
BnaA03G0279700ZS	0.498484	0.428687	0.171226	0.192159	0.016298	1.35133	UP	AT4G00525	--	--
BnaC01G0230300ZS	0.692478	0.642466	0.420402	0.452947	0.0163024	0.612149	UP	AT4G17170	RABB1C	member of RAB gene family
BnaC03G0145100ZS	0.721413	0.788011	0.496058	0.476511	0.0163066	0.634126	UP	AT5G54590	CRLK1	Splice variant At5g54590.2 encodes CRLK1 (440-amino acid in length) calcium/calmodulin-regulated receptor-like kinase crucial for cold tolerance. CRLK1 is Primarily localized in the plasma membrane.
BnaA03G0025200ZS	0.606902	0.638955	0.423845	0.375885	0.0163107	0.639554	UP	AT5G06700	TBR	Encodes a member of the TBL (TRICHOME BIREFRINGENCE-LIKE) gene family containing a plant-specific DUF231 (domain of unknown function) domain. TBL gene family has 46 members, two of which (TBR/AT5G06700 and TBL3/AT5G01360) have been shown to be involved in the synthesis and deposition of secondary wall cellulose, presumably by influencing the esterification state of pectic polymers. A nomenclature…
BnaA01G0197900ZS	2.02226	1.77563	0.829631	0.924611	0.0163162	1.11435	UP	AT4G15248	miP1b	B-box type zinc finger family protein
BnaC09G0058000ZS	0.951652	0.852301	0.383961	0.45883	0.0163423	1.09791	UP	AT5G24318	--	O-Glycosyl hydrolases family 17 protein
BnaC04G0058600ZS	0.724553	0.790831	0.502621	0.487335	0.016348	0.614246	UP	AT2G45430	AHL22	Encodes a nuclear localized AT hook domain containing protein that can bind AT rich DNA in vitro. Overexpression of the gene results in delayed flowering. Is likely to act redundantly with AHL18, AHL27 and AHL29 in the regulation of flowering. It is also involved in both photo- and skotomorphogenesis.
BnaC08G0347200ZS	0.73204	0.639225	0.327178	0.327128	0.0163489	1.06747	UP	AT3G54750	--	--
BnaC08G0189600ZS	0.796568	0.7946	0.463488	0.539653	0.0163769	0.665561	UP	AT1G08930	ERD6	encodes a putative sucrose transporter whose gene expression is induced by dehydration and cold.
BnaC01G0153400ZS	0.762065	0.837034	0.507641	0.483352	0.0163825	0.690311	UP	AT5G20160	--	Ribosomal protein L7Ae/L30e/S12e/Gadd45 family protein
BnaC02G0155800ZS	0.863126	0.980321	0.466353	0.429749	0.0163853	1.04067	UP	AT5G55920	TRM4c	Encodes a homolog of the S. cerevisiae Nop2 that is involved in ribosome biogenesis and plays a role on organ size control by promoting cell proliferation and preventing compensation in normal leaf development.
BnaC01G0173300ZS	0.725068	0.666846	0.277867	0.356867	0.0163865	1.13285	UP	AT4G23890	NdhS	--
BnaC01G0378900ZS	0.930963	0.978826	0.571319	0.46934	0.0163884	0.875916	UP	AT3G21520	DMP1	Encodes a protein is directly or indirectly involved in membrane fission during breakdown of the ER and the tonoplast during leaf senescence and in membrane fusion during vacuole biogenesis in roots.
BnaC03G0175300ZS	1.10191	1.15081	0.685724	0.565168	0.0164483	0.848713	UP	AT2G31140	AtIMP2	Peptidase S24/S26A/S26B/S26C family protein
BnaA01G0359800ZS	0.867577	0.78804	0.51347	0.524273	0.0164608	0.673921	UP	AT3G13520	ATAGP12	Encodes a GPI-anchored arabinogalactan (AG) peptide with a short 'classical' backbone of 10 amino acids, seven of which are conserved among the 4 other Arabidopsis AG peptides. These peptides may be involved in cell signaling.
BnaC02G0223700ZS	0.502174	0.522744	0.229296	0.291487	0.0164671	0.976755	UP	AT1G68410	--	Protein phosphatase 2C family protein
BnaC09G0471300ZS	0.815701	0.923326	0.301684	0.178434	0.0164771	1.85682	UP
BnaA05G0097100ZS	0.913585	0.945846	0.527947	0.615289	0.0164845	0.701739	UP	AT2G34810	AtBBE16	FAD-binding Berberine family protein
BnaC06G0194300ZS	0.71014	0.777621	0.442044	0.47344	0.0164968	0.700536	UP	AT3G55410	E1-OGDH1	2-oxoglutarate dehydrogenase, E1 component
BnaA07G0027700ZS	0.618573	0.667938	0.322979	0.243319	0.0165136	1.18383	UP	AT2G17530	--	Protein kinase superfamily protein
BnaA06G0349000ZS	0.513391	0.586507	0.224168	0.168224	0.0165139	1.487	UP	AT5G27520	PNC2	encodes a peroxisomal adenine nucleotide transporter, involved in fatty acid beta-oxidation during early stage of postgerminative growth.
BnaC01G0041700ZS	0.441611	0.491292	0.274955	0.260578	0.0165217	0.800751	UP	AT4G34640	SQS1	Encodes squalene synthase, which converts two molecules of farnesyl diphosphate (FPP) into squalene via an intermediate: presqualene diphosphate (PSPP). It is generally thought to be one of the key enzymes of sterol biosynthesis, since it catalyzes the first pathway-specific reaction of the sterol branch of the isoprenoid pathway.
BnaC07G0420000ZS	0.61566	0.569824	0.310735	0.359769	0.0165671	0.82216	UP	AT4G18070	--	--
BnaA09G0490800ZS	0.598242	0.667103	0.370686	0.363678	0.0165716	0.784963	UP	AT3G52730	--	ubiquinol-cytochrome C reductase UQCRX/QCR9-like family protein
BnaA07G0329700ZS	1.16313	1.02592	0.492751	0.551522	0.0165804	1.0678	UP	AT1G71970	--	--
BnaA06G0347300ZS	0.28615	0.32905	0.134621	0.144012	0.0166031	1.14269	UP	AT5G27860	--	--
BnaA03G0518600ZS	1.08603	1.0813	0.660175	0.757864	0.0166139	0.612024	UP	--	--	--
BnaC07G0433500ZS	0.534129	0.458848	0.195536	0.210219	0.0166355	1.29115	UP	AT4G20380	LSD1	LSD1 monitors a superoxide-dependent signal and negatively regulates a plant cell death pathway. contains zinc-finger motifs. LSD1 negatively regulates a basal defense pathway that can act upstream or independently of both NIM1/NPR1 function and SA accumulation following avirulent or virulent pathogen challenge
BnaA04G0167600ZS	0.381678	0.42615	0.225114	0.203216	0.0166376	0.915325	UP	AT2G25190	--	PPPDE putative thiol peptidase family protein
BnaA07G0240600ZS	1.23362	1.14317	0.756248	0.811062	0.0166477	0.600722	UP	AT1G76980	--	--
BnaC03G0507900ZS	0.84665	0.816194	0.551647	0.474174	0.0166513	0.696872	UP	AT2G17840	ERD7	Identified as drought-inducible gene by differential hybridization. Upregulated by high light, drought, cold and salt stress determined by microarray analysis.
BnaA08G0230200ZS	0.966678	0.978549	0.56046	0.437183	0.0166563	0.963342	UP	AT1G26550	--	FKBP-like peptidyl-prolyl cis-trans isomerase family protein
BnaC03G0763000ZS	0.628214	0.538607	0.212561	0.239378	0.0166914	1.36838	UP	AT4G31800	WRKY18	Pathogen-induced transcription factor. Binds W-box sequences in vitro. Forms protein complexes with itself and with WRKY40 and WRKY60. Constitutive expression of WRKY18 enhanced resistance to P. syringae, but its coexpression with WRKY40 or WRKY60 made plants more susceptible to both P. syringae and B. cinerea. WRKY18, WRKY40, and WRKY60 have partially redundant roles in response to the hemibiotr…
BnaC02G0400200ZS	0.511072	0.515666	0.355953	0.308813	0.0166935	0.627149	UP	AT5G45340	CYP707A3	Encodes a protein with ABA 8'-hydroxylase activity; involved in ABA catabolism. Mutant analyses show that disruption in the gene results in more drought tolerance whereas overexpression results in increased transpiration rate and reduced drought tolerance. Gene involved in postgermination growth. Plant P450 CYP707A3, ABA 8'-hydroxylase, binds enantioselectively (+)-ABA but not (-)-ABA, whereas th…
BnaC02G0268100ZS	0.250823	0.278027	0.118395	0.140869	0.0167045	1.02844	UP	--	--	--
BnaC09G0398800ZS	0.685598	0.609743	0.263974	0.318526	0.0167497	1.153	UP	AT5G56730	--	Insulinase (Peptidase family M16) protein
BnaC04G0603300ZS	0.733565	0.627165	0.254197	0.27688	0.0167635	1.35739	UP	AT2G45170	ATG8E	Involved in autophagy. Under nutrient starvation the protein localizes to autophagosomes.
BnaA09G0683400ZS	0.61999	0.552457	0.330802	0.318848	0.0167778	0.851788	UP	AT1G04440	CKL13	casein kinase like 13
BnaC03G0116800ZS	0.677749	0.633206	0.409516	0.448851	0.0168065	0.610952	UP	AT5G59540	--	2-oxoglutarate (2OG) and Fe(II)-dependent oxygenase superfamily protein
BnaC01G0315300ZS	3.09287	2.76998	0.815918	1.20443	0.0168486	1.537	UP	--	--	--
BnaC05G0377900ZS	0.541224	0.496789	0.301684	0.331114	0.016863	0.714007	UP	AT3G20898	SMR13	--
BnaA04G0019500ZS	0.91826	1.01566	0.447955	0.527968	0.0168754	0.986687	UP	AT3G59820	LETM1	LETM1-like protein
BnaA05G0010900ZS	1.07854	1.20988	0.637521	0.590204	0.0168845	0.898361	UP	AT2G46860	PPa3	Encodes a protein that might have inorganic pyrophosphatase activity.
BnaA03G0386000ZS	0.663036	0.634166	0.431224	0.373114	0.0168941	0.689529	UP	AT2G04795	--	--
BnaC02G0110300ZS	0.825447	0.923326	0.370314	0.260216	0.0169158	1.47171	UP	AT5G22380	NAC090	NAC domain containing protein 90
BnaA04G0152100ZS	0.768934	0.718648	0.43358	0.48855	0.0169202	0.689928	UP	AT2G23070	pCK2	Protein kinase superfamily protein
BnaC04G0087800ZS	1.33684	1.19193	0.673324	0.591062	0.0169291	1	UP	AT2G37900	--	Major facilitator superfamily protein
BnaA07G0108600ZS	0.553688	0.580802	0.26664	0.180101	0.0169464	1.34453	UP	AT1G26470	SNS1	--
BnaA02G0375000ZS	0.749786	0.646956	0.296755	0.252944	0.0169707	1.34535	UP	AT5G26920	CBP60G	Encodes a calmodulin-binding protein CBP60g (calmodulin binding protein 60-like.g). The calmodulin-binding domain is located near the N-terminus; calmodulin binding is dependent on Ca(2+). Inducible by both bacterial pathogen and MAMP (microbe-associated molecular pattern) treatments. Bacterial growth is enhanced in cbp60g mutants. cbp60g mutants also show defects in salicylic acid (SA) accumulat…
BnaC06G0382900ZS	0.607465	0.688605	0.341878	0.322714	0.0169881	0.963602	UP	AT1G71697	CK1	Encodes choline kinase. mRNA levels are increased in response to wounding.
BnaA06G0416900ZS	0.98235	0.895932	0.586608	0.61125	0.0169986	0.648957	UP	AT5G47370	HAT2	homeobox-leucine zipper genes induced by auxin, but not by other phytohormones. Plays opposite roles in the shoot and root tissues in regulating auxin-mediated morphogenesis.
BnaC03G0519900ZS	1.16313	0.994351	0.301684	0.152943	0.0170095	2.24659	UP
BnaA03G0249600ZS	0.533853	0.49244	0.30655	0.335875	0.0170297	0.675843	UP	AT5G40080	--	Mitochondrial ribosomal protein L27
BnaA03G0387600ZS	0.863536	0.860372	0.419958	0.523135	0.0170323	0.87021	UP	AT2G05320	GNT2	beta-1,2-N-acetylglucosaminyltransferase II
BnaA07G0366400ZS	0.831407	0.910135	0.570498	0.574778	0.0170394	0.604671	UP	AT1G77060	--	Phosphoenolpyruvate carboxylase family protein
BnaC03G0443300ZS	0.684379	0.781394	0.36878	0.361213	0.0170452	1.00571	UP	AT3G20410	CPK9	calmodulin-domain protein kinase CDPK isoform 9 (CPK9)
BnaC03G0744900ZS	0.772517	0.694976	0.39596	0.337472	0.01706	1.00062	UP	AT4G34640	SQS1	Encodes squalene synthase, which converts two molecules of farnesyl diphosphate (FPP) into squalene via an intermediate: presqualene diphosphate (PSPP). It is generally thought to be one of the key enzymes of sterol biosynthesis, since it catalyzes the first pathway-specific reaction of the sterol branch of the isoprenoid pathway.
BnaA03G0240000ZS	0.638123	0.592391	0.411073	0.373861	0.0170616	0.648617	UP	AT2G24210	TPS10	terpene synthase 10
BnaC05G0293100ZS	0.672392	0.626757	0.401537	0.441189	0.0170955	0.624431	UP	AT1G51070	bHLH115	basic helix-loop-helix (bHLH) DNA-binding superfamily protein
BnaC02G0060000ZS	0.951652	1.00361	0.533749	0.62552	0.0171046	0.75415	UP	AT5G14200	IMD1	The AtIMD1 is one out of 3 genes encoding the enzyme 3-isopropylmalate dehydrogenase involved in leucine biosynthesis in Arabidopsis. Its subcellular location has been targeted to plastids. Encodes methylthioalkylmalate dehydrogenase. Involved in glucosinolate biosynthesis, in methionine chain elongation.
BnaC01G0051300ZS	1.61781	1.35201	0.232297	0.393282	0.0171215	2.24711	UP	AT4G33460	EMB2751	member of NAP subfamily
BnaC01G0412300ZS	0.740173	0.642314	0.114151	0.21412	0.0171574	2.07431	UP	--	--	--
BnaC06G0323900ZS	0.806835	0.756033	0.532171	0.479374	0.0172068	0.627636	UP	AT1G65540	LETM2	LETM1-like protein
BnaC03G0616300ZS	1.10191	1.25308	0.30655	0.455006	0.0172252	1.6287	UP	AT3G47070	--	--
BnaC04G0467700ZS	0.801391	0.970676	0.255458	0.235532	0.017247	1.85167	UP	AT2G25605	--	--
BnaA03G0055400ZS	1.20356	1.06538	0.59834	0.619822	0.0172548	0.897309	UP	AT5G13870	XTH5	EXGT-A4, endoxyloglucan transferase,
BnaA06G0303900ZS	0.901032	0.989278	0.38257	0.486111	0.0172746	1.12172	UP	AT5G65470	--	O-fucosyltransferase family protein
BnaC07G0339200ZS	0.655732	0.725948	0.365502	0.301107	0.0172929	1.05151	UP	AT5G28646	WVD2	Encodes a novel protein. The wvd2 gain-of-function mutant has impaired cell expansion and root waving, and changed root skewing.
BnaC09G0618400ZS	0.592064	0.519371	0.261318	0.282336	0.0173026	1.03166	UP	AT5G02290	PBL11	Encodes a candidate protein kinase NAK that is similar to the oncogenes met and abl.
BnaC08G0403100ZS	0.496514	0.449723	0.298838	0.29599	0.0173336	0.669729	UP	AT3G61390	PUB36	RING/U-box superfamily protein
BnaC04G0348800ZS	0.55513	0.527615	0.364101	0.318287	0.017356	0.666028	UP	AT3G52070	--	--
BnaC02G0044000ZS	0.986132	0.923326	0.64046	0.571524	0.0174118	0.655791	UP	AT5G11210	GLR2.5	member of Putative ligand-gated ion channel subunit family
BnaC02G0422500ZS	0.486891	0.507448	0.334252	0.2891	0.0174173	0.673691	UP	AT2G01100	--	--
BnaA08G0095400ZS	0.579266	0.512959	0.175982	0.237912	0.0174241	1.39994	UP	AT4G15802	HSBP	Encodes a protein with similarity to heat shock factor binding proteins. Involved in negative regulation of heat shock response. Becomes nuclear localized upon heat treatment.
BnaA06G0452100ZS	0.79133	0.929621	0.34822	0.333776	0.0174432	1.33537	UP	AT3G45970	EXPL1	member of EXPANSIN-LIKE. Naming convention from the Expansin Working Group (Kende et al, 2004. Plant Mol Bio)
BnaC07G0364000ZS	0.531852	0.564977	0.35018	0.300469	0.0174572	0.753388	UP	AT5G24590	TIP	Member of NAc protein family. Interacts with turnip crinkle virus (TCV) capsid protein. Transcription factor involved in regulating the defense response of Arabidopsis to TCV.
BnaA02G0353500ZS	1.0876	1.27845	0.461954	0.475823	0.0174799	1.33517	UP	AT3G29280	--	--
BnaC03G0485600ZS	0.556021	0.601235	0.205028	0.282639	0.0175228	1.24674	UP	AT2G14045	--	--
BnaC05G0264500ZS	1.36945	1.16631	0.422358	0.497955	0.0175312	1.46222	UP	AT1G30515	--	--
BnaC03G0131100ZS	0.810846	0.697129	0.320138	0.274243	0.0175441	1.34315	UP	AT5G57015	ckl12	casein kinase I-like 12
BnaA03G0494200ZS	0.418308	0.387695	0.181381	0.22539	0.0175582	0.98657	UP	AT4G26710	VHA-e2	ATPase, V0 complex, subunit E
BnaC05G0043100ZS	0.790744	0.760168	0.46846	0.378873	0.0176247	0.872116	UP	AT1G05970	EDM3	RNA-binding (RRM/RBD/RNP motifs) family protein
BnaC06G0142700ZS	1.16794	1.15907	0.699907	0.80961	0.0176475	0.624387	UP	AT1G55920	SERAT2;1	Encodes a chloroplast/cytosol localized serine O-acetyltransferase involved in sulfur assimilation and cysteine biosynthesis. Expressed in the vascular system.
BnaA07G0003600ZS	0.660082	0.647477	0.453983	0.393282	0.0176616	0.625989	UP	AT2G20340	AtAAS	Encodes an aromatic aldehyde synthase (AtAAS), which catalyzes the in vitro conversion of phenylalanine and 3,4-dihydroxy-L-phenylalanine to phenylacetaldehyde and dopaldehyde, respectively.
BnaA03G0245100ZS	1.11026	0.954103	0.422358	0.343401	0.0176768	1.43074	UP	AT5G50280	EMB1006	Pentatricopeptide repeat (PPR) superfamily protein
BnaC05G0421700ZS	1.17557	1.06538	0.688627	0.713735	0.0176833	0.676249	UP	AT3G18110	EMB1270	Pentatricopeptide repeat (PPR) superfamily protein
BnaC08G0156000ZS	0.449944	0.507282	0.265116	0.266625	0.0176916	0.848135	UP	AT4G18070	--	--
BnaA02G0200800ZS	0.691327	0.77322	0.420931	0.431444	0.017709	0.780893	UP	AT1G72520	LOX4	PLAT/LH2 domain-containing lipoxygenase family protein
BnaC03G0227400ZS	0.787574	0.923326	0.338683	0.356867	0.0177143	1.29853	UP	AT2G39760	BPM3	Encodes a member of the MATH-BTB domain proteins (BPMs) that directly interact with and target for proteasomal degradation the class I homeobox-leucine zipper (HD-ZIP) transcription factor ATHB6. Known members include AT5G19000 (BPM1), AT3G06190 (BPM2), AT2G39760 (BPM3), AT3G03740 (BPM4), AT5G21010 (BPM5) and AT3G43700 (BPM6).
BnaC04G0528100ZS	0.511789	0.490073	0.295518	0.339989	0.0177638	0.656706	UP	AT2G33710	--	encodes a member of the ERF (ethylene response factor) subfamily B-4 of ERF/AP2 transcription factor family. The protein contains one AP2 domain. There are 7 members in this subfamily.
BnaC02G0379200ZS	0.950117	0.884478	0.572312	0.627521	0.0177725	0.612627	UP	AT5G42650	DDE2	Encodes a member of the cytochrome p450 CYP74 gene family that functions as an allene oxide synthase. This enzyme catalyzes dehydration of the hydroperoxide to an unstable allene oxide in the JA biosynthetic pathway. It shows a dual catalytic activity, the major one being a 13-AOS but also expressing a 9-AOS activity.
BnaA05G0430400ZS	0.841409	0.939109	0.513678	0.532198	0.0178332	0.767585	UP	AT3G11820	SYR1	Encodes a syntaxin localized at the plasma membrane (SYR1, Syntaxin Related Protein 1, also known as SYP121, PENETRATION1/PEN1). SYR1/PEN1 is a member of the SNARE superfamily proteins. SNARE proteins are involved in cell signaling, vesicle traffic, growth and development. SYR1/PEN1 functions in positioning anchoring of the KAT1 K+ channel protein at the plasma membrane. Transcription is upregula…
BnaA05G0180300ZS	0.684521	0.746808	0.43478	0.469562	0.0178371	0.662414	UP	AT1G50190	--	Cysteine/Histidine-rich C1 domain family protein
BnaC09G0487400ZS	0.901565	1.03412	0.410625	0.465479	0.0178424	1.14367	UP	AT5G17780	--	alpha/beta-Hydrolases superfamily protein
BnaA08G0278400ZS	0.612499	0.679428	0.386844	0.353764	0.0178482	0.802742	UP	AT1G12580	PEPKR1	phosphoenolpyruvate carboxylase-related kinase 1
BnaC08G0447300ZS	1.37723	1.23907	0.798359	0.760691	0.0178561	0.746866	UP	AT2G22122	--	--
BnaA08G0255500ZS	0.823818	0.923326	0.486915	0.436171	0.0178819	0.920461	UP	AT1G18720	MHP1	Protein of unknown function (DUF962)
BnaC07G0477600ZS	0.512947	0.546366	0.294067	0.340896	0.0178888	0.738385	UP	AT4G27657	--	--
Bnascaffold0027G0023600ZS	0.89758	0.982513	0.628075	0.625232	0.0178904	0.585065	UP	AT1G06090	ADS1.2	Fatty acid desaturase family protein
BnaA01G0405100ZS	0.831999	0.897095	0.595784	0.551138	0.0178917	0.592249	UP	AT3G03990	D14	alpha/beta-Hydrolases superfamily protein
Bnascaffold0026G0029000ZS	0.689462	0.747454	0.41689	0.46491	0.0179041	0.704452	UP	AT2G03760	SULT202A1	Encodes a brassinosteroid sulfotransferase. In vitro experiements show that this enzyme has a preference for 24-epibrassinosteroids, particularly 24-epicathasterone, but does not act on castasterone and brassinolide. It also shows sulfating activity toward flavonoids. It is differentially expressed during development, being more abundant in young seedlings and actively growing cell cultures. Expr…
BnaA03G0539700ZS	0.704137	0.708331	0.438057	0.50206	0.0179439	0.587306	UP	AT4G33890	ADA1B	--
BnaC05G0096100ZS	1.12788	1.02986	0.586608	0.474471	0.0179491	1.02399	UP	AT1G13250	GATL3	Encodes a protein with putative galacturonosyltransferase activity.
BnaC01G0490500ZS	0.658836	0.593567	0.234643	0.133825	0.017965	1.76509	UP	AT3G06730	TRX z	Encodes a plastidial thioredoxin (TRX) isoform that defines a branch of plastidial TRXs lying between x- and y-type TRXs and thus was named TRX z. Possesses disulfide reductase activity in vitro. TRX z was previously named as Trx p (thioredoxin putative and plastidic) before its thioredoxin activity was confirmed (Meng et al., PNAS 2010, 107:3900). Knockout mutant of TRX z has a severe albino phe…
BnaA07G0327000ZS	0.595041	0.663598	0.376726	0.377366	0.0179681	0.739052	UP	AT1G71697	CK1	Encodes choline kinase. mRNA levels are increased in response to wounding.
BnaA08G0205900ZS	0.511513	0.56502	0.289853	0.237912	0.0179698	1.02843	UP	AT1G30135	TIFY5A	jasmonate-zim-domain protein 8
BnaA10G0190900ZS	0.843285	0.743743	0.409428	0.359984	0.0179824	1.0445	UP	AT5G17990	TRP1	Encodes the tryptophan biosynthetic enzyme phosphoribosylanthranilate transferase (PAT1, called trpD in bacteria). Converts anthranilate and phosphoribosylpyrophosphate into phosphoribosylanthranilate and inorganic pyrophosphate.
BnaC04G0323500ZS	0.727734	0.668615	0.39596	0.325835	0.0179907	0.951997	UP	AT3G54660	MIAO	Encodes glutathione reductase that is most likely localized in the chloroplast.
BnaA10G0231200ZS	0.79054	0.717755	0.486701	0.466853	0.0179971	0.661532	UP	AT5G12010	--	--
BnaA08G0208100ZS	0.5802	0.635343	0.400934	0.406829	0.0179973	0.589598	UP	AT1G29690	NSL2	Encodes a protein containing a domain with significant homology to the MACPF (membrane attack complex and perforin) domain of complements and perforin proteins that are involved in innate immunity in animals. Transgenic <i>cad1-1</i> mutant plants show lesions seen in the hypersensitive response, as well as a spontaneous activation of expression of pathogenesis-related genes and leading to a 32-f…
BnaA04G0197700ZS	0.511513	0.472399	0.332607	0.306683	0.0180399	0.62206	UP	AT2G30590	WRKY21	Encodes WRKY DNA-binding protein 21 (WRKY21).
BnaC03G0321500ZS	0.473435	0.423955	0.265873	0.25005	0.0180442	0.798581	UP	AT4G03020	--	transducin family protein / WD-40 repeat family protein
BnaC07G0301100ZS	0.795643	0.79597	0.426063	0.514713	0.0180523	0.758568	UP	AT3G26950	--	--
BnaC04G0552100ZS	1.24904	1.31904	0.630961	0.439221	0.0180673	1.26283	UP	AT2G36890	RAX2	Putative homolog of the Blind gene in tomato. Together with RAX1 and RAX3 belong to the class R2R3 MYB genes; encoded by the Myb-like transcription factor MYB38, regulates axillary meristem formation.
BnaA07G0152100ZS	0.716353	0.647305	0.392709	0.341909	0.018069	0.892415	UP	AT2G26770	SCAB1	Encodes a plant-specific actin binding protein SCAB1 (STOMATAL CLOSURE-RELATED ACTIN BINDING PROTEIN1). SCAB1 stabilizes actin filaments and regulates stomatal movement.
BnaC06G0367400ZS	1.23339	1.07929	0.267154	0.425308	0.0180719	1.73976	UP	AT1G70130	LecRK-V.2	Concanavalin A-like lectin protein kinase family protein
BnaC01G0442100ZS	0.889248	0.809717	0.554766	0.527543	0.0180799	0.650544	UP	AT3G14075	--	--
BnaA06G0277400ZS	0.825698	0.939245	0.362021	0.430448	0.0180819	1.15519	UP	AT5G62440	EMB514	Encodes a protein DOMINO1 that belongs to a plant-specific gene family sharing a common motif present in the tomato DEFECTIVE CHLOROPLASTS AND LEAVES (LeDCL) protein. DOMINO1 is located in the nucleus. Arabidopsis embryos carrying the domino1 mutation grow slowly in comparison with wild type embryos and reach only the globular stage at desiccation. The primary defect of the mutation at the cellul…
BnaA06G0359300ZS	0.422956	0.461663	0.297816	0.283134	0.018082	0.606641	UP	AT5G49015	--	Expressed protein
BnaA04G0100300ZS	1.62341	1.76271	1.14771	1.0706	0.018087	0.610169	UP	AT5G38300	--	--
BnaA10G0295700ZS	0.726002	0.67512	0.444587	0.484098	0.0180912	0.593321	UP	AT5G02600	NPCC6	Heavy metal transport/detoxification superfamily protein
BnaA09G0183400ZS	1.20697	1.34102	0.767923	0.787207	0.0181017	0.712326	UP	AT1G54570	PES1	--
BnaC03G0389600ZS	0.882344	0.906332	0.543551	0.624747	0.0181205	0.614483	UP	AT3G11730	RABD1	Encodes a member of the Rab GTPase family of proteins. This protein interacts with the tail region of a myosin XI protein (AT5G43900) in a GTP-dependent manner. It has also been identified as an isoprenylated protein.
BnaA04G0270500ZS	1.64953	1.7046	0.817466	0.551522	0.0182072	1.29283	UP	AT2G42430	LBD16	LOB-domain protein gene LBD16. This gene contains one auxin-responsive element (AuxRE).
BnaA03G0367600ZS	0.525539	0.565909	0.362964	0.325379	0.018213	0.665045	UP	AT3G21400	--	--
BnaC02G0077900ZS	0.431563	0.457181	0.246375	0.287624	0.0182251	0.734928	UP	AT5G17070	PP4R2L	--
BnaC07G0499800ZS	0.550956	0.485961	0.27375	0.283395	0.0182448	0.896176	UP	AT4G30720	PDE327	Encodes a putative oxidoreductase/electron carrier detected in the chloroplast stroma that is essential to ensure a correct electron flow through the photosynthetic chain and, hence, photosynthesis efficiency and normal growth. Mutations in the Col-0 allele result in pale green pigmentation and defective growth.
BnaA03G0152400ZS	1.14991	1.02814	0.570371	0.627067	0.0182524	0.863084	UP	AT2G31570	GPXL2	glutathione peroxidase GPx
BnaC07G0464200ZS	0.733029	0.83591	0.388297	0.411268	0.0182601	0.972503	UP	AT4G25370	ClpT1	Double Clp-N motif protein
BnaA06G0315200ZS	0.634434	0.61555	0.351965	0.267651	0.018274	1.01247	UP
BnaC06G0011000ZS	1.17126	1.07721	0.647161	0.535301	0.0182809	0.927154	UP	AT1G44760	--	Adenine nucleotide alpha hydrolases-like superfamily protein
BnaA09G0612700ZS	0.629318	0.72547	0.325893	0.297389	0.0182821	1.12011	UP	AT1G18680	M20	HNH endonuclease domain-containing protein
BnaA01G0218900ZS	1.35235	1.2311	0.549065	0.688244	0.0182881	1.06209	UP	AT3G49340	--	Cysteine proteinases superfamily protein
BnaC01G0044500ZS	0.816173	0.902261	0.529678	0.547587	0.0182933	0.673722	UP	AT3G25580	--	Thioredoxin superfamily protein
BnaA07G0228800ZS	0.883912	0.951495	0.576099	0.496121	0.0183081	0.7755	UP	AT1G80840	WRKY40	Pathogen-induced transcription factor. Binds W-box sequences in vitro. Forms protein complexes with itself and with WRKY40 and WRKY60. Coexpression with WRKY18 or WRKY60 made plants more susceptible to both P. syringae and B. cinerea. WRKY18, WRKY40, and WRKY60 have partially redundant roles in response to the hemibiotrophic bacterial pathogen Pseudomonas syringae and the necrotrophic fungal path…
BnaA03G0478000ZS	0.770222	0.847394	0.325606	0.417579	0.018335	1.12208	UP	AT4G24130	SVB5	Protein of unknown function, DUF538
BnaC04G0114700ZS	0.552798	0.493205	0.292056	0.306861	0.0183455	0.80446	UP	AT2G39430	--	Disease resistance-responsive (dirigent-like protein) family protein
BnaA09G0092300ZS	0.490442	0.548123	0.308165	0.289895	0.0183486	0.796229	UP	AT5G65670	IAA9	auxin (indole-3-acetic acid) induced gene
BnaA08G0298200ZS	0.364055	0.328856	0.212882	0.196026	0.0183648	0.760894	UP	AT1G08730	XIC	Class XI myosin gene
BnaA05G0108300ZS	0.317217	0.272801	0.131987	0.116793	0.018404	1.24589	UP	AT2G33390	--	--
BnaA07G0185200ZS	0.890908	0.815773	0.542336	0.573467	0.0184229	0.613112	UP	AT3G53580	--	diaminopimelate epimerase family protein
BnaA03G0349000ZS	0.598181	0.613088	0.316768	0.225956	0.0184263	1.15823	UP	AT3G17300	EMB2786	--
BnaC09G0451800ZS	0.540837	0.577079	0.258659	0.171115	0.0184355	1.37916	UP	AT5G22000	RHF2A	encodes a RING-type E3 ubiquitin ligase implicated in gametogenesis. Double mutant analyses with RHF1a suggests that RHF2a may be involved in targetting ICK4KRP6 for degradation following meiosis in order to allow the mitoses associated with megagametogenesis and microgametogenesis to occur. RHF2a is expressed in all four floral whorls and is present at ~8-fold higher levels than RHF1a in inflore…
BnaA05G0323200ZS	0.418727	0.481735	0.186334	0.21412	0.0184449	1.16903	UP	AT1G32610	--	hydroxyproline-rich glycoprotein family protein
BnaC03G0390000ZS	0.885377	0.957487	0.628345	0.578624	0.0184499	0.61056	UP	AT3G11820	SYR1	Encodes a syntaxin localized at the plasma membrane (SYR1, Syntaxin Related Protein 1, also known as SYP121, PENETRATION1/PEN1). SYR1/PEN1 is a member of the SNARE superfamily proteins. SNARE proteins are involved in cell signaling, vesicle traffic, growth and development. SYR1/PEN1 functions in positioning anchoring of the KAT1 K+ channel protein at the plasma membrane. Transcription is upregula…
BnaA10G0183200ZS	0.669681	0.702004	0.41733	0.338955	0.0184544	0.858948	UP	AT5G19080	VBP1	Paralog of LOG2 (At3g09770), a ubiquitin ligase that regulates amino acid export.
BnaA09G0446200ZS	0.999108	0.986144	0.670852	0.568957	0.0184626	0.679205	UP	AT1G27130	GSTU13	Encodes glutathione transferase belonging to the tau class of GSTs. Naming convention according to Wagner et al. (2002).
BnaC06G0365000ZS	0.628334	0.724177	0.328825	0.328141	0.0184643	1.04175	UP	AT1G69920	GSTU12	Encodes glutathione transferase belonging to the tau class of GSTs. Naming convention according to Wagner et al. (2002).
BnaA09G0627500ZS	0.919282	0.900806	0.398451	0.521214	0.0184842	0.984828	UP	AT1G15370	LOLITA	SNARE-like superfamily protein
BnaC01G0280300ZS	0.577407	0.677885	0.239976	0.264773	0.0184881	1.31439	UP	AT3G01920	--	DHBP synthase RibB-like alpha/beta domain
BnaA03G0520900ZS	0.585632	0.503632	0.236666	0.250068	0.01849	1.16215	UP	AT4G30630	INB2A	--
BnaA03G0320500ZS	1.00763	0.90867	0.59394	0.602214	0.01849	0.679921	UP	AT3G10740	ATASD1	Encodes a bifunctional alpha-l-arabinofuranosidase/beta-d-xylosidase that belongs to family 51 of glycoside hydrolases. It may be involved in cell wall modification.
BnaC04G0421100ZS	1.0344	1.15416	0.39596	0.21412	0.0185002	1.84291	UP	AT5G38910	--	RmlC-like cupins superfamily protein
BnaC02G0118800ZS	0.625371	0.706073	0.237037	0.309285	0.0185067	1.28517	UP	AT5G60450	ARF4	Encodes a member of the ARF family of transcription factors which mediate auxin responses. ARF4 appears to have redundant function with ETT(ARF3) in specifying abaxial cell identity.
BnaC01G0425700ZS	1.1737	1.13492	0.315192	0.515475	0.0185247	1.47469	UP	AT3G15990	SULTR3;4	Encodes sulfate transporter Sultr3;4.
BnaC09G0370700ZS	0.766608	0.728007	0.511752	0.448962	0.0185306	0.637594	UP	AT5G54650	Fh5	Encodes a protein with similarity to formins that is involved in cytokinesis. Loss of function mutations exhibit delayed cellularization during endosperm development. FH5 is expressed in the endosperm and the protein localizes to the cell plate. FH5 was shown to be a maternally expressed imprinted gene.
BnaA08G0305800ZS	0.936625	1.01515	0.608481	0.660687	0.0185526	0.620902	UP	AT1G06900	--	Insulinase (Peptidase family M16) family protein
BnaC06G0299200ZS	0.751805	0.679903	0.452526	0.457522	0.0185595	0.653722	UP	AT1G70710	GH9B1	endo-1,4-beta-glucanase. Involved in cell elongation.
BnaA01G0410900ZS	0.664272	0.609094	0.38864	0.3368	0.0185625	0.811717	UP	AT3G03070	--	NADH-ubiquinone oxidoreductase-related
BnaA04G0044200ZS	1.31174	1.21186	0.710698	0.807339	0.0185702	0.733277	UP	AT3G55030	PGPS2	Encodes a phosphatidylglycerolphosphate synthase.
BnaA04G0297200ZS	0.285495	0.25569	0.16149	0.150789	0.0186066	0.793289	UP	AT2G47190	MYB2	Encodes a MYB transcription factor that possesses an R2R3 MYB DNA binding domain and is known to regulate the expression of salt- and dehydration-responsive genes. Has been shown to bind calmodulin.
BnaA07G0162000ZS	0.59068	0.660135	0.361083	0.376158	0.0186176	0.762661	UP	AT2G28430	--	--
BnaC02G0136900ZS	0.447836	0.405363	0.236319	0.196556	0.0186268	0.978931	UP	AT5G58200	--	Calcineurin-like metallo-phosphoesterase superfamily protein
BnaC06G0458300ZS	0.924708	0.835122	0.558696	0.552446	0.0186315	0.663392	UP	AT1G80240	DGR1	Protein of unknown function, DUF642
BnaC06G0161500ZS	0.16314	0.145788	0.0867858	0.0917659	0.018638	0.790931	UP	AT1G09600	--	Protein kinase superfamily protein
BnaA03G0551400ZS	0.515699	0.459389	0.237751	0.186192	0.018655	1.20166	UP	AT4G35600	PBL30	Encodes a receptor-like cytoplasmic kinase that acts as a spatial inhibitor of cell separation. Analysis of the cDNA previously described in Meiners et al., 1991 revealed mistakes in the predicted open reading frame.
BnaC04G0072800ZS	0.532472	0.649372	0.150842	0.172678	0.0186609	1.86911	UP	AT2G39518	CASPL4D2	Uncharacterised protein family (UPF0497)
BnaA04G0026400ZS	0.757797	0.681142	0.194507	0.30052	0.0186728	1.53943	UP	AT3G58010	PGL34	plastoglobulin 34kD
BnaA08G0269000ZS	0.556109	0.551873	0.280358	0.346862	0.0186762	0.820891	UP	AT1G15270	--	Translation machinery associated TMA7
BnaA09G0496100ZS	0.73204	0.80791	0.305036	0.393604	0.0186785	1.14026	UP	AT3G53440	--	Homeodomain-like superfamily protein
BnaC05G0461700ZS	1.24447	1.06182	0.43478	0.321181	0.0187096	1.60919	UP	AT3G14170	CORD1	Plant protein of unknown function (DUF936)
BnaC05G0490400ZS	0.66537	0.817752	0.193151	0.19201	0.0187235	1.9451	UP	AT3G11170	FADD	Chloroplastic enzyme responsible for the synthesis of 16:3 and 18:3 fatty acids from galactolipids, sulpholipids and phosphatidylglycerol. Uses ferredoxin as electron donor. Gene expression is induced by wounding in shoot and root. The wound-response in shoot is independent of jasmonic acid mediated pathway whereas the root response is mediated by jasmonic acid.
BnaC04G0080700ZS	0.563222	0.666846	0.239976	0.207023	0.0187419	1.4604	UP	AT2G38465	--	--
BnaC05G0046300ZS	0.687304	0.865618	0.140786	0.109805	0.0187707	2.63158	UP	AT1G06460	ACD32.1	ACD32.1 encodes an alpha-crystallin domain containing protein with homology to small heat shock proteins.
BnaC09G0546500ZS	0.868622	0.910677	0.405525	0.2559	0.0187874	1.42766	UP	AT5G11020	--	Protein kinase superfamily protein
BnaC01G0461000ZS	0.561089	0.563385	0.265327	0.337784	0.0187902	0.898756	UP	AT3G12140	EML1	Emsy N Terminus (ENT)/ plant Tudor-like domains-containing protein
BnaA02G0005200ZS	1.52264	1.84665	0.527947	0.45883	0.0187927	1.77165	UP	AT5G01370	TRM29	Nuclear protein with a lysine-rich domain and a C-terminal serine-rich domain. Interacts with Alcatraz (ALC). ACI1 is mainly expressed in the vascular system. Involved in cell separation during fruit dehiscence.
BnaA09G0669900ZS	0.622234	0.543133	0.205313	0.261703	0.0188057	1.31924	UP	AT1G07615	Obg A-1	GTP-binding protein Obg/CgtA
BnaC04G0088800ZS	0.40613	0.453805	0.24487	0.216348	0.018867	0.898779	UP	AT2G37750	--	--
BnaC06G0123300ZS	0.717515	0.795562	0.472295	0.443276	0.0188724	0.724742	UP	AT1G52720	--	--
BnaA03G0429200ZS	0.91376	0.916212	0.630908	0.538918	0.0188828	0.645529	UP	AT4G15760	MO1	Encodes a protein with similarity to monooxygenases that are known to degrade salicylic acid (SA).
Bnascaffold0750G0000200ZS	0.727734	0.879358	0.263974	0.23274	0.0188887	1.69397	UP	AT2G39725	SDHAF1	LYR family of Fe/S cluster biogenesis protein
BnaC03G0005800ZS	0.574582	0.61635	0.31465	0.371335	0.0188948	0.795841	UP	AT5G01290	--	mRNA capping enzyme family protein
BnaC07G0397100ZS	0.339556	0.385867	0.192481	0.19826	0.0188958	0.892614	UP	AT3G52155	--	Phosphoglycerate mutase family protein
BnaA05G0368200ZS	0.590184	0.650843	0.404472	0.390324	0.0189327	0.642878	UP	AT3G19130	RBP47B	RNA-binding protein 47B
BnaA05G0074500ZS	0.666156	0.633138	0.436922	0.37786	0.0189511	0.673243	UP	AT2G38010	AtNCER2	Neutral/alkaline non-lysosomal ceramidase
BnaC02G0022400ZS	0.849847	0.958333	0.513931	0.478851	0.018997	0.86499	UP	AT5G05987	PRA1.A2	prenylated RAB acceptor 1.A2
BnaA03G0566000ZS	1.16974	1.03697	0.601166	0.631831	0.019028	0.839724	UP	AT4G37800	XTH7	xyloglucan endotransglucosylase/hydrolase 7
BnaC08G0448700ZS	0.815701	0.923326	0.419252	0.47002	0.0190519	0.967583	UP	AT2G21900	WRKY59	member of WRKY Transcription Factor; Group II-c
BnaA09G0531200ZS	0.893976	0.765041	0.226263	0.0892168	0.0190555	2.39471	UP	AT3G57700	ZRK10	Protein kinase superfamily protein
BnaA09G0201500ZS	1.11555	1.08478	0.742882	0.631297	0.0190699	0.679149	UP	AT5G45370	UMAMIT1	nodulin MtN21-like transporter family protein
BnaA09G0611500ZS	0.722683	0.682159	0.438296	0.364225	0.0190886	0.807796	UP	AT1G18890	CPK10	encodes a calcium-dependent protein kinase whose gene expression is induced by dehydration and high salt. Kinase activity could not be detected in vitro.
BnaA03G0529800ZS	0.56632	0.658678	0.259388	0.283942	0.0190934	1.17288	UP	AT4G31985	--	Ribosomal protein L39 family protein
BnaC02G0146500ZS	1.30178	1.30942	0.775959	0.906013	0.0190952	0.634557	UP	AT5G57290	P3B	60S acidic ribosomal protein family
BnaA03G0459500ZS	1.09969	1.16075	0.517986	0.329416	0.0191142	1.41548	UP	AT4G21110	--	G10 family protein
BnaC09G0095400ZS	1.0445	0.947001	0.598703	0.639827	0.0191819	0.685224	UP	AT5G66985	HUP44	--
BnaA09G0035500ZS	0.761321	0.639225	0.263974	0.267651	0.0191949	1.39751	UP	AT3G26540	--	Tetratricopeptide repeat (TPR)-like superfamily protein
BnaA06G0363200ZS	0.754451	0.720704	0.330737	0.425959	0.0192045	0.96308	UP	AT5G48570	ROF2	Encodes one of the 36 carboxylate clamp (CC)-tetratricopeptide repeat (TPR) proteins (Prasad 2010, Pubmed ID: 20856808) with potential to interact with Hsp90/Hsp70 as co-chaperones.
BnaA06G0400600ZS	0.761321	0.649748	0.305654	0.267651	0.0192256	1.29942	UP	AT1G14260	--	RING/FYVE/PHD zinc finger superfamily protein
BnaA06G0309700ZS	0.685189	0.640262	0.36905	0.428241	0.0192261	0.733305	UP	AT5G67480	BT4	BTB and TAZ domain protein. Located in cytoplasm and expressed in fruit, flower and leaves.
BnaA06G0125800ZS	1.6314	1.61987	0.509742	0.785108	0.0192734	1.32822	UP	AT1G18370	NACK1	Encodes a kinesin HINKEL. Required for cytokinesis in pollen. Mutant has cytokinesis defects; seedling lethal.
BnaA09G0687200ZS	0.696115	0.759371	0.422358	0.470197	0.0192764	0.705489	UP	AT1G03680	TRX-M1	encodes a chloroplast thioredoxin similar to prokaryotic thioredoxins.
BnaC09G0539000ZS	0.898782	0.857374	0.422358	0.279288	0.0193717	1.32361	UP	AT5G11780	--	--
BnaC04G0411400ZS	0.57432	0.566385	0.284279	0.19056	0.0193739	1.26441	UP	AT5G41080	GDPD2	Encodes a member of the glycerophosphodiester phosphodiesterase (GDPD) family.
BnaC04G0026500ZS	0.713739	0.783074	0.477108	0.500987	0.019406	0.613847	UP	AT2G41490	GPT	UDP-GlcNAc:dolichol phosphate N-acetylglucosamine-1-phosphate transferase
BnaA06G0279200ZS	0.807877	0.738661	0.358464	0.438686	0.0194106	0.956119	UP	AT5G62620	GALT6	Galactosyltransferase family protein
BnaA03G0298900ZS	0.850142	0.74892	0.434199	0.445201	0.0194352	0.862634	UP	AT3G05520	CPA	Encodes a capping protein that acts as a phosphatidic acid biosensor and key transducer of fluxes in membrane signaling phospholipids into changes in actin cytoskeleton dynamics.
BnaA02G0224500ZS	0.47407	0.528595	0.28558	0.305886	0.0194399	0.761472	UP	AT1G76900	TLP1	Member of TLP family
BnaC07G0010700ZS	1.02486	1.02775	0.476855	0.61308	0.0194507	0.913214	UP	AT2G20320	--	DENN (AEX-3) domain-containing protein
BnaA02G0063900ZS	0.904849	0.796595	0.466239	0.470416	0.0194812	0.86117	UP	AT5G16400	TRXF2	Encodes an f-type thioredoxin (Trx-f2) localized in chloroplast stroma.
BnaA09G0247200ZS	0.45787	0.512959	0.2866	0.263984	0.0194947	0.818254	UP	AT4G11680	--	Zinc finger, C3HC4 type (RING finger) family protein
BnaC04G0034200ZS	0.679751	0.743457	0.436436	0.471986	0.0194981	0.647712	UP	AT2G42450	LEA24	alpha/beta-Hydrolases superfamily protein
BnaA07G0315100ZS	1.16055	1.181	0.601047	0.741186	0.019499	0.802827	UP	AT1G70070	PDE317	Allelic to ISE2(increased size exclusion limit of plasmodesmata 2). Mutants maintain dilated plasmodesmata at the embryonic torpedo stage.
BnaC03G0665400ZS	0.852695	0.879553	0.520134	0.602305	0.0195108	0.626009	UP	AT1G30360	OSCA3.1	Early-responsive to dehydration stress protein (ERD4)
BnaC03G0122200ZS	0.622234	0.579342	0.213693	0.301107	0.0195147	1.22284	UP	AT5G58520	--	Protein kinase superfamily protein
BnaA04G0143200ZS	1.15684	1.05436	0.653649	0.555127	0.0195243	0.871282	UP	--	--	--
BnaC01G0063100ZS	0.837453	0.710251	0.329967	0.313347	0.0195327	1.26653	UP	AT4G32450	MEF8S	Pentatricopeptide repeat (PPR) superfamily protein
BnaA05G0005500ZS	0.994908	1.14201	0.502807	0.410642	0.0195423	1.22614	UP	AT2G47360	--	--
BnaC08G0416000ZS	0.601043	0.544237	0.353999	0.318198	0.0195565	0.768745	UP	AT3G62790	--	NADH-ubiquinone oxidoreductase-related
BnaC07G0307100ZS	0.602269	0.671678	0.377705	0.339821	0.019604	0.828202	UP	AT3G27560	ATN1	encodes a protein with kinase domains, including catalytic domains for serine/threonine as well as tyrosine kinases. a member of multi-gene family and is expressed in all tissues examined.
BnaA09G0013100ZS	0.741479	0.732293	0.436648	0.510879	0.0196099	0.637274	UP	AT4G00585	--	--
BnaA09G0575800ZS	0.574526	0.518994	0.317627	0.343843	0.0196105	0.725233	UP	AT2G25250	--	--
BnaA01G0284700ZS	1.66539	1.94924	0.745337	0.588831	0.0196108	1.43791	UP	AT3G24495	MSH7	encodes a DNA mismatch repair homolog of human MutS gene, MSH6. There are four MutS genes in Arabidopsis, MSH2, MSH3, MSH6, and MSH7, which all act as heterodimers and bind to 51-mer duplexes. MSH2*MSH7 exhibit moderate affinity for a (T/G) substrate and weak binding of (+T), suggesting MSH2*MSH7 may be specialized for lesions/base mispairs not tested or for (T/G) mispairs in special contexts.
BnaC06G0320300ZS	0.793043	0.683261	0.350807	0.353469	0.0196385	1.06778	UP	AT2G14247	--	Expressed protein
BnaA05G0472700ZS	0.805244	0.777537	0.365502	0.468388	0.0196488	0.924532	UP	AT3G05620	PMEI-PME22	Plant invertase/pectin methylesterase inhibitor superfamily
BnaA03G0482500ZS	0.581565	0.532911	0.370578	0.339996	0.0196491	0.649308	UP	AT5G50460	SEC61gamma	secE/sec61-gamma protein transport protein
BnaC08G0143600ZS	0.380661	0.461663	0.105589	0.133825	0.0196492	1.81486	UP	AT2G04660	APC2	a highly conserved ubiquitin-protein ligase involved in cell cycle regulation
BnaC03G0467400ZS	0.552572	0.573099	0.287971	0.199491	0.0196597	1.20742	UP	AT3G24515	UBC37	ubiquitin-conjugating enzyme 37
BnaC03G0081400ZS	0.59978	0.679932	0.27538	0.328559	0.0196648	1.08334	UP	AT5G16830	SYP21	member of SYP2 Gene Family. Over-expression of the gene in tobacco protoplasts leads to a disruption of vacuolar transport from the prevacuolar compartment (PVC) to the vacuole, but not from the Golgi apparatus to the plasma membrane.
BnaC08G0206400ZS	0.55616	0.589594	0.311844	0.368965	0.0196681	0.750975	UP	--	--	--
BnaC08G0415900ZS	0.544477	0.610244	0.287971	0.327572	0.0196763	0.907612	UP	AT3G62770	PEUP2	Required for autophagosome formation during nutrient deprivation and senescence.
BnaC09G0093000ZS	0.677222	0.755448	0.441269	0.44278	0.0197386	0.696508	UP	AT5G67340	PUB2	ARM repeat superfamily protein
BnaC08G0330800ZS	0.838744	0.941792	0.443215	0.346371	0.0197629	1.17314	UP	AT3G52920	--	Family of unknown function (DUF662)
BnaC06G0427300ZS	0.552357	0.624603	0.298135	0.328854	0.0197736	0.908554	UP	AT1G76670	URGT1	Nucleotide-sugar transporter family protein
BnaC03G0117200ZS	0.65426	0.707883	0.316768	0.210297	0.0197766	1.36983	UP	AT5G59460	--	scarecrow-like transcription factor 11 (SCL11)
BnaA02G0135000ZS	0.649438	0.627861	0.3369	0.409559	0.0197841	0.774961	UP	AT5G54130	--	Calcium-binding endonuclease/exonuclease/phosphatase family
BnaA10G0209100ZS	0.763826	0.871711	0.418717	0.361328	0.0197997	1.06814	UP	AT5G15400	UFD2	U-box domain-containing protein
BnaA07G0224500ZS	0.67493	0.755448	0.371963	0.416037	0.0198137	0.86013	UP	AT1G80000	BTZ1	CASC3/Barentsz eIF4AIII binding
BnaA07G0226300ZS	0.744299	0.828041	0.495753	0.479102	0.0198155	0.689653	UP	AT1G80380	GLYK	encodes a glycerate kinase which catalyzes the last step of photorespiration C2 cycle.
BnaA03G0291900ZS	0.840994	0.827146	0.412056	0.516842	0.0198372	0.844648	UP	AT3G03710	RIF10	Encodes a chloroplast polynucleotide phosphorylase (PNPase). Involved in response to phosphorus (P) starvation. Mutants impaired in the expression of this gene have been selected through their resistance to fosmidomycin, a strong inhibitor of DXR, an enzyme of the methylerythritol-dependent IPP biosynthesis pathway. The pathway enzymes were upregulated in the mutant seedlings.
BnaC06G0363000ZS	0.970576	0.858965	0.525109	0.523803	0.0198385	0.802589	UP	AT1G69740	HEMB1	Encodes a putative 5-aminolevulinate dehydratase involved in chlorophyll biosynthesis.
BnaA02G0058200ZS	1.05331	0.923326	0.53561	0.501867	0.0198407	0.929969	UP	AT5G15190	--	--
BnaC04G0578800ZS	0.775186	0.846382	0.524203	0.469462	0.0198498	0.706559	UP	AT5G42440	--	Protein kinase superfamily protein
BnaC05G0144600ZS	0.973501	0.861055	0.527947	0.505659	0.0198752	0.827744	UP	AT1G17147	--	VQ motif-containing protein
BnaA01G0346000ZS	0.805244	0.857764	0.446939	0.331736	0.0198884	1.0947	UP	AT3G15790	MBD11	Protein containing methyl-CpG-binding domain.Has sequence similarity to human MBD proteins.
BnaA02G0221200ZS	0.656145	0.628564	0.340611	0.41187	0.0199954	0.771715	UP	AT1G76360	PBL31	Protein kinase superfamily protein
BnaA04G0227900ZS	0.436709	0.403821	0.237037	0.271552	0.0200108	0.724797	UP	AT2G35680	PTPMT1	Phosphotyrosine protein phosphatases superfamily protein
BnaC03G0047900ZS	0.494968	0.465337	0.288266	0.327872	0.020037	0.64024	UP	AT5G10490	MSL2	A member of MscS-like gene family, structurally very similar to MSL3, comprising of an N-terminal chloroplast transit peptide, five trans-membrane helices and a C-terminal cytoplasmic domain. Mutant plants showed abnormalities in the size and shape of plastids. MSL2-GFP was localized to discrete foci on the plastid envelope and co-localize with the plastid division protein AtMinE.
BnaC06G0383000ZS	0.845912	0.923326	0.422358	0.291982	0.0200409	1.30845	UP	AT1G71710	--	DNAse I-like superfamily protein
BnaC02G0061200ZS	1.09124	1.22182	0.692323	0.706986	0.0200573	0.725088	UP	AT5G14330	--	--
BnaC06G0298600ZS	0.751304	0.793113	0.404088	0.488069	0.0200654	0.791693	UP	AT1G70780	--	--
BnaA09G0510500ZS	0.832695	0.760386	0.362964	0.448962	0.0200681	0.9724	UP	AT3G55150	EXO70H1	A member of EXO70 gene family, putative exocyst subunits, conserved in land plants. Arabidopsis thaliana contains 23 putative EXO70 genes, which can be classified into eight clusters on the phylogenetic tree.
BnaA03G0168800ZS	0.564539	0.640371	0.32023	0.276513	0.0200925	1.01374	UP	AT2G35190	NSPN11	plant-specific SNARE located in cell plate of dividing cells. cofractionates with the cytokinesis-specific syntaxin, KNOLLE, which is required for the formation of the cell plate.
BnaA09G0455300ZS	0.425359	0.465134	0.208572	0.255373	0.0201105	0.940652	UP	--	--	--
BnaC03G0813600ZS	0.598244	0.571934	0.358513	0.410018	0.0201115	0.606554	UP	AT1G55740	SIP1	seed imbibition 1
BnaA03G0397900ZS	1.10305	1.00458	0.579551	0.461364	0.0201702	1.01777	UP	AT2G16440	MCM4	Minichromosome maintenance (MCM2/3/5) family protein
BnaA02G0116600ZS	0.925399	1.02109	0.633536	0.64551	0.0202447	0.605805	UP	AT5G57625	AtCAPE5	CAP (Cysteine-rich secretory proteins, Antigen 5, and Pathogenesis-related 1 protein) superfamily protein
BnaC06G0220100ZS	0.672252	0.62203	0.365196	0.419151	0.0202619	0.722587	UP	AT3G59660	BAGP1	C2 domain-containing protein / GRAM domain-containing protein
BnaA05G0368900ZS	0.554188	0.589693	0.348597	0.394398	0.0202643	0.622514	UP	AT3G19030	--	--
BnaA07G0313800ZS	0.655541	0.591143	0.383091	0.344539	0.0202756	0.776818	UP	AT1G69920	GSTU12	Encodes glutathione transferase belonging to the tau class of GSTs. Naming convention according to Wagner et al. (2002).
BnaC04G0003800ZS	0.735044	0.790897	0.49793	0.432359	0.0202767	0.713949	UP	AT2G47580	U1A	encodes spliceosomal protein U1A
BnaC08G0464200ZS	0.660275	0.723586	0.444913	0.399289	0.0202767	0.713039	UP	AT1G19190	NPF5.1	alpha/beta-Hydrolases superfamily protein
BnaC05G0329100ZS	0.453668	0.499365	0.285844	0.309961	0.0202873	0.677686	UP	AT1G35190	--	2-oxoglutarate (2OG) and Fe(II)-dependent oxygenase superfamily protein
BnaA01G0201100ZS	1.06361	1.14058	0.457554	0.603929	0.0203094	1.05417	UP	AT4G14890	FdC1	2Fe-2S ferredoxin-like superfamily protein
BnaA10G0283900ZS	0.78708	0.768315	0.460465	0.5388	0.0203413	0.638342	UP	AT5G04380	--	S-adenosyl-L-methionine-dependent methyltransferases superfamily protein
BnaA06G0101000ZS	0.673572	0.581575	0.312545	0.291982	0.0203535	1.05398	UP	AT1G15140	FNRL	FAD/NAD(P)-binding oxidoreductase
BnaA06G0404100ZS	0.641059	0.577456	0.388931	0.390567	0.0203637	0.644507	UP	AT2G02100	PDF2.2	Predicted to encode a PR (pathogenesis-related) protein. Belongs to the plant defensin (PDF) family with the following members: At1g75830/PDF1.1, At5g44420/PDF1.2a, At2g26020/PDF1.2b, At5g44430/PDF1.2c, At2g26010/PDF1.3, At1g19610/PDF1.4, At1g55010/PDF1.5, At2g02120/PDF2.1, At2g02100/PDF2.2, At2g02130/PDF2.3, At1g61070/PDF2.4, At5g63660/PDF2.5, At2g02140/PDF2.6, At5g38330/PDF3.1 and At4g30070/PDF…
BnaC03G0307200ZS	0.457525	0.534557	0.17189	0.21412	0.0203701	1.36182	UP	AT4G11840	PLDGAMMA3	member of C2-PLD subfamily
BnaA05G0144400ZS	0.574272	0.514932	0.218789	0.280396	0.0203775	1.12563	UP	AT5G36160	TAT2	Encodes an L-tyrosine aminotransferase.
BnaA05G0072400ZS	0.827466	0.809441	0.466027	0.553705	0.0203934	0.682782	UP	AT5G37070	--	Protein of unknown function, DUF538
BnaA09G0156800ZS	0.651428	0.633925	0.433187	0.364659	0.0204064	0.687982	UP	AT1G62330	--	O-fucosyltransferase family protein
BnaC06G0375000ZS	0.848801	0.944694	0.549899	0.569356	0.0204176	0.680234	UP	AT1G70810	CAR7	Calcium-dependent lipid-binding (CaLB domain) family protein
BnaA05G0071200ZS	0.621099	0.688668	0.422481	0.421778	0.020428	0.633553	UP	AT2G38470	WRKY33	Member of the plant WRKY transcription factor family. Regulates the antagonistic relationship between defense pathways mediating responses to P. syringae and necrotrophic fungal pathogens. Located in nucleus. Involved in response to various abiotic stresses - especially salt stress.
BnaC04G0291200ZS	0.678188	0.589258	0.325401	0.329038	0.0204371	0.953593	UP	AT3G58500	PP2A-4	Encodes one of the isoforms of the catalytic subunit of protein phosphatase 2A: AT1G59830/PP2A-1, AT1G10430/PP2A-2, At2g42500/PP2A-3, At3g58500/PP2A-4 [Plant Molecular Biology (1993) 21:475-485 and (1994) 26:523-528; Note that in more recent publications, there is mixed use of gene names for PP2A-3 and PP2A-4 - some refer to At2g42500 as PP2A-3 and some as PP2A-4].
BnaC09G0446000ZS	0.692699	0.78407	0.426277	0.420023	0.0204567	0.803202	UP	AT5G22650	HDT2	Encodes a member of a plant-specific class of histone deacetylases. Controls the development of adaxial/abaxial leaf polarity. Its mRNA is widely expressed in stems, leaves, flowers and young siliques. Plant lines expressing RNAi constructs directed against this gene showed a marked reduction in agrobacterium-mediated root transformation.
Bnascaffold2542G0000100ZS	0.585632	0.563003	0.256839	0.334563	0.0204589	0.957709	UP	AT3G09250	--	Nuclear transport factor 2 (NTF2) family protein
BnaA10G0170800ZS	0.768642	0.739264	0.422358	0.501944	0.0204838	0.70611	UP	AT5G20890	CCT2	TCP-1/cpn60 chaperonin family protein
BnaC03G0529500ZS	1.54643	1.25908	0.406113	0.305886	0.0204849	1.97832	UP	AT5G64640	PMEI-PME94	Plant invertase/pectin methylesterase inhibitor superfamily
BnaC07G0216700ZS	0.400094	0.490338	0.132415	0.136872	0.0205109	1.72536	UP	AT5G66210	CPK28	member of Calcium Dependent Protein Kinase
BnaC03G0618800ZS	0.951652	1.04923	0.633536	0.570988	0.0205337	0.732175	UP	AT3G47480	CML47	Calcium-binding EF-hand family protein
BnaC01G0161100ZS	0.888208	1.07858	0.102471	0.242218	0.0205444	2.51247	UP	AT4G23010	UTR2	UDP-galactose transporter 2
BnaA09G0000900ZS	0.641611	0.644076	0.458858	0.39619	0.020558	0.588464	UP	AT4G00110	GAE3	Encodes a putative membrane-anchored UDP-D-glucuronate 4-epimerase.
BnaC05G0455700ZS	0.739331	0.795898	0.421746	0.321064	0.0205859	1.04739	UP	AT3G14610	CYP72A7	putative cytochrome P450
BnaA01G0115400ZS	1.05944	0.978267	0.596703	0.673663	0.0205958	0.681706	UP	AT4G21390	B120	S-locus lectin protein kinase family protein
BnaA10G0087500ZS	0.603486	0.735241	0.214033	0.219987	0.0205977	1.62503	UP	AT5G51600	PLE	Mutant has defective roots. Essential for giant cell ontogenesis. Role in organizing the mitotic microtubule array during both early and late mitosis in all plant organs.
BnaC02G0224100ZS	0.962782	0.873714	0.613504	0.588389	0.0206097	0.611648	UP	AT1G68440	--	--
BnaA01G0302500ZS	0.655674	0.660233	0.331534	0.414512	0.0206113	0.818721	UP	AT3G22240	AthCYSTM9	--
BnaA07G0315800ZS	0.860349	0.847643	0.432215	0.538918	0.0206114	0.814561	UP	AT1G70090	LGT8	Encodes a protein with putative galacturonosyltransferase activity.
BnaA05G0100200ZS	0.843917	0.820734	0.39596	0.505001	0.0206504	0.885683	UP	AT2G34510	AthB-1	Protein of unknown function, DUF642
BnaC03G0778500ZS	0.957575	0.923326	0.644239	0.550017	0.0206593	0.65531	UP	AT4G29520	SES1	--
BnaC06G0160300ZS	0.904069	0.893541	0.222293	0.394432	0.0206697	1.54338	UP	AT3G29635	--	HXXXD-type acyl-transferase family protein
BnaA03G0534700ZS	1.09149	1.1296	0.719474	0.592248	0.0206713	0.759804	UP	AT4G32960	--	--
BnaC07G0533300ZS	0.627057	0.674429	0.376625	0.431022	0.0206757	0.688365	UP	AT4G36720	HVA22K	HVA22-like protein K
BnaC07G0137500ZS	0.59954	0.61555	0.413649	0.349584	0.0206966	0.670868	UP	AT1G29690	NSL2	Encodes a protein containing a domain with significant homology to the MACPF (membrane attack complex and perforin) domain of complements and perforin proteins that are involved in innate immunity in animals. Transgenic <i>cad1-1</i> mutant plants show lesions seen in the hypersensitive response, as well as a spontaneous activation of expression of pathogenesis-related genes and leading to a 32-f…
BnaA10G0264500ZS	0.412236	0.373177	0.258993	0.247062	0.0207107	0.634159	UP	AT5G06930	--	--
BnaA03G0010000ZS	0.887133	0.894916	0.534986	0.62552	0.020712	0.618782	UP	AT5G03370	--	acylphosphatase family
BnaC04G0547900ZS	0.773217	0.61555	0.0879912	0.147669	0.0207123	2.55902	UP	AT2G36130	Cyclophilin	Cyclophilin-like peptidyl-prolyl cis-trans isomerase family protein
BnaC03G0207800ZS	0.695251	0.765134	0.463207	0.488603	0.0207131	0.617602	UP	AT2G37110	--	PLAC8 family protein
BnaC09G0440500ZS	0.784867	0.717226	0.379302	0.275523	0.0207146	1.19779	UP	AT5G60550	GRIK2	Encodes a geminivirus Rep interacting kinase (GRIK; GRIK1/AT3G45240, GRIK2/AT5G60550). GRIKs are SnRK1 (SNF1-related kinases) activating kinases. Both GRIKs specifically bind to the SnRK1 catalytic subunit and phosphorylate the equivalent threonine residue in its activation loop in vitro.
BnaA04G0196900ZS	0.760287	0.893541	0.373962	0.340397	0.0207321	1.21109	UP	AT2G30500	NET4B	Kinase interacting (KIP1-like) family protein
BnaC09G0163600ZS	1.17126	1.17937	0.777138	0.640853	0.0207636	0.729203	UP	AT1G63270	NAP10	Encodes a member of a heterogenous group of non-intrinsic ATP-binding cassette (ABC) proteins. Members of this group bear no close resemblance to each other nor to representatives of specific ABC protein subfamilies from other organisms. This grouping is arbitrary and will likely change upon acquisition of further data.
BnaA05G0488500ZS	1.09018	1.02038	0.708692	0.617501	0.0207707	0.670337	UP	AT3G03100	--	NADH:ubiquinone oxidoreductase, 17.2kDa subunit
BnaC01G0023000ZS	0.748349	0.832728	0.492478	0.505677	0.0207987	0.663572	UP	AT4G36800	RCE1	RUB1 conjugating enzyme that conjugates CUL1 and is involved in auxin response and embryogenesis. RCE1 protein physically interacts with RBX1, which may be the E3 for CUL1.
BnaA05G0337500ZS	0.582949	0.481355	0.185296	0.153991	0.0208305	1.64933	UP	AT3G22260	--	Cysteine proteinases superfamily protein
BnaC09G0285100ZS	0.746866	0.841856	0.457554	0.474007	0.0208498	0.770144	UP	AT4G12390	PME1	pectin methylesterase inhibitor 1
BnaC04G0407900ZS	0.664646	0.66376	0.452878	0.380214	0.0208539	0.673149	UP	AT5G40780	LHT1	Encodes LHT1 (lysine histidine transporter), a high-affinity transporter for cellular amino acid uptake in both root epidermis and leaf mesophyll.
BnaA08G0255800ZS	0.762671	0.748011	0.484523	0.392692	0.0208781	0.784198	UP	AT1G18670	IBS1	Encodes a cyclin-dependent kinase-like protein with a ser/thr protein kinase domain and an N-terminal myristoylation sequence. Mutants in this gene are unable to express female sterility in response to beta-aminobutyric acid, as wild type plants do.
BnaA03G0529100ZS	0.380661	0.447673	0.140786	0.082354	0.0209084	1.89226	UP	--	--	--
BnaC06G0216600ZS	1.37461	1.44039	0.844715	0.664512	0.0209088	0.899323	UP	AT5G38390	--	F-box/RNI-like superfamily protein
BnaC08G0325400ZS	0.786672	0.88592	0.37066	0.447668	0.0209469	1.03133	UP	AT3G52430	PAD4	Encodes a lipase-like gene that is important for salicylic acid signaling and function in resistance (R) gene-mediated and basal plant disease resistance. PAD4 can interact directly with EDS1, another disease resistance signaling protein. Expressed at elevated level in response to green peach aphid (GPA) feeding, and modulates the GPA feeding-induced leaf senescence through a mechanism that doesn…
BnaA08G0245100ZS	0.861694	0.969841	0.50139	0.542976	0.0209863	0.810426	UP	AT1G20950	--	Phosphofructokinase family protein
BnaA01G0284400ZS	1.26887	1.05523	0.444587	0.421752	0.0210401	1.42367	UP	AT1G62150	mTERF20	Mitochondrial transcription termination factor family protein
BnaA02G0239700ZS	0.682498	0.771004	0.422231	0.388401	0.0210402	0.842414	UP	AT1G80840	WRKY40	Pathogen-induced transcription factor. Binds W-box sequences in vitro. Forms protein complexes with itself and with WRKY40 and WRKY60. Coexpression with WRKY18 or WRKY60 made plants more susceptible to both P. syringae and B. cinerea. WRKY18, WRKY40, and WRKY60 have partially redundant roles in response to the hemibiotrophic bacterial pathogen Pseudomonas syringae and the necrotrophic fungal path…
BnaA09G0480700ZS	0.759491	0.682458	0.446564	0.406466	0.021061	0.757352	UP	AT3G51540	BPP7	--
BnaA03G0016200ZS	0.978493	0.874846	0.532347	0.458525	0.0210825	0.903357	UP	AT5G04750	--	F1F0-ATPase inhibitor protein, putative
BnaA03G0320800ZS	0.589584	0.54364	0.387352	0.351658	0.0210944	0.616767	UP	AT3G10770	--	Single-stranded nucleic acid binding R3H protein
BnaC06G0248700ZS	0.754358	0.761744	0.311211	0.425939	0.0210958	1.04034	UP	AT1G79560	FTSH12	Encodes an FtsH protease that is localized to the chloroplast. Mutations in this locus result in embryo lethality.
BnaA05G0480100ZS	0.79071	0.737229	0.389014	0.471701	0.0210959	0.827981	UP	AT3G04870	ZDS	Involved in the biosynthesis of carotenes and xanthophylls, reduces zeta-carotene to lycopene.
BnaC03G0160300ZS	0.404053	0.445558	0.213693	0.156342	0.0211037	1.19914	UP	AT5G51840	--	--
BnaC05G0483600ZS	0.669536	0.704643	0.481794	0.421813	0.0211241	0.604803	UP	AT3G11820	SYR1	Encodes a syntaxin localized at the plasma membrane (SYR1, Syntaxin Related Protein 1, also known as SYP121, PENETRATION1/PEN1). SYR1/PEN1 is a member of the SNARE superfamily proteins. SNARE proteins are involved in cell signaling, vesicle traffic, growth and development. SYR1/PEN1 functions in positioning anchoring of the KAT1 K+ channel protein at the plasma membrane. Transcription is upregula…
BnaA09G0602700ZS	0.749825	0.662719	0.414302	0.395843	0.0211566	0.802045	UP	AT2G20900	DGK5	diacylglycerol kinase 5
BnaA03G0078800ZS	0.580669	0.542271	0.329967	0.37786	0.0211751	0.665812	UP	AT5G18610	PBL27	Protein kinase superfamily protein
BnaC03G0115200ZS	0.499227	0.598452	0.117322	0.181458	0.0211788	1.8773	UP	AT5G59740	--	UDP-N-acetylglucosamine (UAA) transporter family
BnaC09G0486300ZS	0.951652	1.0839	0.563144	0.574953	0.0211957	0.8388	UP	AT5G17870	PSRP6	plastid-specific ribosomal protein 6 precursor (Psrp-6) - like
BnaA10G0150000ZS	0.684819	0.801325	0.321158	0.351481	0.0212057	1.14367	UP	AT5G59490	--	Haloacid dehalogenase-like hydrolase (HAD) superfamily protein
BnaC07G0537800ZS	0.695063	0.694086	0.4877	0.415814	0.0212201	0.620582	UP	AT4G37445	--	--
BnaA05G0400200ZS	0.740691	0.7374	0.412354	0.49657	0.0212309	0.701504	UP	AT3G15353	MT3	metallothionein, binds to and detoxifies excess copper and other metals, limiting oxidative damage
BnaC06G0187300ZS	0.530518	0.635407	0.230892	0.204036	0.0212418	1.42263	UP	AT3G54000	--	--
BnaC03G0009900ZS	0.546693	0.558855	0.339395	0.393282	0.021253	0.593513	UP	AT5G02430	--	Transducin/WD40 repeat-like superfamily protein
BnaC06G0135000ZS	0.941251	0.944798	0.588399	0.465098	0.0212545	0.840182	UP	AT1G53990	GLIP3	Contains lipase signature motif and GDSL domain.
BnaA04G0149400ZS	1.36442	1.27636	0.879912	0.760691	0.0212616	0.686737	UP	AT2G22795	--	--
BnaA06G0174700ZS	1.13382	1.02634	0.640877	0.697991	0.0212626	0.690123	UP	AT1G29840	--	alpha/beta-Hydrolases superfamily protein
BnaC03G0290400ZS	0.77266	0.702608	0.495881	0.466262	0.0212714	0.616653	UP	AT5G60160	DAP1	Zn-dependent exopeptidases superfamily protein
BnaC05G0260500ZS	0.502522	0.552185	0.240767	0.298773	0.0212724	0.967041	UP	AT1G30270	SnRK3.23	Arabidopsis thaliana CBL-interacting protein kinase 23. CIPK23 serves as a positive regulator of the potassium transporter AKT1 by directly phosphorylating AKT1. CIPK23 is activated by the binding of two calcineurin B-like proteins, CBL1 and CBL9.
BnaA05G0141600ZS	0.513041	0.550182	0.3187	0.361651	0.021295	0.644094	UP	AT2G29330	TRI	tropinone reductase
BnaA07G0323600ZS	0.630759	0.707699	0.384934	0.409348	0.0213029	0.752849	UP	AT1G71110	--	--
BnaA09G0166200ZS	0.547598	0.592322	0.301042	0.356867	0.0213211	0.792972	UP	AT1G60690	--	NAD(P)-linked oxidoreductase superfamily protein
BnaA08G0007400ZS	1.23155	1.09575	0.705767	0.706959	0.0213442	0.720177	UP	AT1G55210	--	Disease resistance-responsive (dirigent-like protein) family protein
BnaA04G0265300ZS	0.907389	0.994661	0.60987	0.64885	0.0213692	0.595598	UP	AT2G41480	PRX25	Encodes a cationic cell-wall-bound peroxidase homolog that is involved in the lignification of cell walls.
BnaA02G0401800ZS	0.936498	0.843729	0.580994	0.561313	0.0213935	0.64011	UP	AT5G62865	--	--
BnaA05G0048000ZS	0.710402	0.640097	0.432057	0.441424	0.0214007	0.628645	UP	AT2G44790	UCC2	Encodes a uclacyanin, a protein precursor that is closely related to precursors of stellacyanins and a blue copper protein from pea pods.
BnaA07G0270400ZS	1.37461	1.10437	0.339828	0.313611	0.0214118	1.92362	UP	AT1G28760	PNET2_A	Uncharacterized conserved protein (DUF2215)
BnaC05G0364300ZS	0.669681	0.685745	0.342823	0.428241	0.0214143	0.813824	UP	AT3G21865	PEX22	Interacts with PEX4 in a yeast two-hybrid. The PEX4 and PEX22 pair may be important during the remodeling of peroxisome matrix contents as glyoxysomes transition to leaf peroxisomes.
BnaA02G0412400ZS	1.49957	1.47732	0.934527	0.742122	0.0214775	0.828227	UP	AT5G65220	PRPL29	Ribosomal L29 family protein
BnaC02G0256800ZS	1.26887	1.08049	0.443476	0.52591	0.0214905	1.27712	UP	AT1G71140	DTX14	MATE efflux family protein
BnaA04G0233700ZS	0.214889	0.201697	0.11864	0.13844	0.0215329	0.6964	UP	AT4G19210	RLI2	member of RLI subfamily
BnaA03G0269300ZS	0.827523	0.99172	0.342452	0.267651	0.0215506	1.57621	UP	AT4G02790	RBGA	GTP-binding family protein
BnaA07G0065300ZS	0.407851	0.461663	0.0844715	0.16059	0.0215667	1.82706	UP	AT3G24770	CLE41	Belongs to a large gene family, called CLE for CLAVATA3/ESR-related, encoding small peptides with conserved carboxyl termini. The C-terminal 12 amino acid sequence of CLE41 is identical to that of a dodeca peptide (TDIF, tracheary element differentiation inhibitory factor) isolated from Arabidopsis and functions as a suppressor of plant stem cell differentiation. TDIF sequence is also identical t…
BnaC04G0528000ZS	0.790443	0.847566	0.539023	0.463168	0.021585	0.708785	UP	AT2G33700	PP2CG1	Encodes a putative protein phosphatase 2C that positively regulates salt tolerance in abscisic acid-dependent manner.
BnaC05G0548100ZS	0.601043	0.541952	0.255974	0.317215	0.0215862	0.995734	UP	AT3G02990	HSFA1E	member of Heat Stress Transcription Factor (Hsf) family
BnaC09G0524800ZS	0.84633	0.762747	0.522871	0.526166	0.0215888	0.617169	UP	AT5G13640	PDAT1	arabidopsis phospholipid:diacylglycerol acyltransferase (PDAT)
Bnascaffold2836G0000100ZS	0.963931	1.05028	0.315152	0.476188	0.0216067	1.34785	UP	AT1G16670	CRPK1	Protein kinase superfamily protein
BnaA02G0418600ZS	1.11769	1.2579	0.707017	0.72449	0.0216723	0.730756	UP	AT5G66595	--	--
BnaA09G0391200ZS	0.507876	0.514145	0.292723	0.216155	0.0216876	1.00603	UP	AT1G32460	--	--
BnaC01G0062200ZS	0.538671	0.52188	0.322137	0.251129	0.0216954	0.887536	UP	AT3G26480	--	Transducin family protein / WD-40 repeat family protein
BnaA06G0106300ZS	1.10191	1.00726	0.549065	0.404001	0.0217179	1.14603	UP	AT1G15760	--	Sterile alpha motif (SAM) domain-containing protein
BnaA03G0151000ZS	0.675366	0.617196	0.29231	0.367241	0.0217274	0.970677	UP	AT2G31360	AtADS2	Encodes a protein homologous to delta 9 acyl-lipid desaturases of cyanobacteria and acyl-CoA desaturases of yeast and mammals. expression up-regulated by cold temperature. It is involved in the synthesis of the 24:1n-9 and 26:1n-9 components of seed lipids, sphingolipids and the membrane phospholipids phosphatidylserine (PS), and phosphatidylethanolamine (PE).
BnaA09G0190800ZS	0.57569	0.548719	0.346378	0.396753	0.0217303	0.59748	UP	AT5G43430	ETFBETA	Encodes the electron transfer flavoprotein ETF beta, a putative subunit of the mitochondrial electron transfer flavoprotein complex (ETF alpha is At1g50940) in Arabidopsis. Mutations of the ETF beta gene result in accelerated senescence and early death compared to wild-type during extended darkness. Also involved in the catabolism of leucine and chlorophyll degradation pathway activated during da…
BnaA02G0213500ZS	0.74395	0.774402	0.450831	0.526094	0.0217559	0.636186	UP	AT1G74950	TIFY10B	TIFY domain/Divergent CCT motif family protein
BnaA09G0480900ZS	0.662018	0.781276	0.263974	0.314883	0.0217691	1.31809	UP	AT3G51560	--	Disease resistance protein (TIR-NBS-LRR class) family
BnaC05G0399900ZS	0.616177	0.626163	0.413497	0.340918	0.0218106	0.719631	UP	AT3G19460	--	Reticulon family protein
BnaC03G0188700ZS	0.867682	0.833245	0.408733	0.256945	0.0218654	1.35343	UP	AT2G33620	AHL10	AT hook motif DNA-binding family protein
BnaC03G0758300ZS	0.770039	0.6848	0.431281	0.388093	0.0218722	0.828265	UP	AT4G32730	PC-MYB1	Encodes a putative c-myb-like transcription factor with three MYB repeats.
BnaA05G0315700ZS	0.622631	0.627757	0.363299	0.431604	0.0218756	0.653525	UP	AT1G35190	--	2-oxoglutarate (2OG) and Fe(II)-dependent oxygenase superfamily protein
BnaC07G0303400ZS	0.738891	0.858676	0.401537	0.400233	0.0219176	0.994616	UP	AT3G27210	--	--
BnaC08G0353700ZS	1.0601	0.961115	0.620089	0.535301	0.0219178	0.806845	UP	AT3G55430	--	O-Glycosyl hydrolases family 17 protein
BnaA06G0155400ZS	0.475826	0.422296	0.188859	0.235895	0.0219188	1.08028	UP	AT1G21770	--	Acyl-CoA N-acyltransferases (NAT) superfamily protein
BnaA01G0171700ZS	1.00847	0.858303	0.422358	0.356867	0.021947	1.26043	UP	AT4G27740	--	Yippee family putative zinc-binding protein
BnaA10G0266700ZS	0.701723	0.646328	0.423794	0.359126	0.0219575	0.783938	UP	AT5G06580	d-LDH	Encodes a protein with glycolate dehydrogenase activity, which was shown to complement various subunits of the E. coli glycolate oxidase complex. It has not been ruled out that the enzyme might be involved in other catalytic activities in vivo.
BnaC09G0483400ZS	0.713739	0.839387	0.105589	0.237912	0.0220078	2.17679	UP
BnaA03G0333700ZS	0.805244	0.815699	0.513075	0.407848	0.0220667	0.815679	UP	AT3G13470	CPNB2	Encodes a subunit of chloroplasts chaperonins that are involved in mediating the folding of newly synthesized, translocated, or stress-denatured proteins. Cpn60 subunits are: Cpn60alpha1 (At2g28000), AtCpn60alpha2 (At5g18820), AtCpn60beta1 (At1g55490), AtCpn60beta2 (At3g13470), AtCpn60beta3 (At5g56500), AtCpn60beta4 (At1g26230).
BnaA08G0322100ZS	0.772355	0.894916	0.431281	0.423261	0.0220848	0.964265	UP	AT1G02410	COX11	cytochrome c oxidase assembly protein CtaG / Cox11 family
BnaC03G0668600ZS	0.703961	0.640033	0.36263	0.277564	0.0221046	1.06995	UP	AT4G38380	--	MATE efflux family protein
BnaA06G0293900ZS	0.330757	0.289173	0.173912	0.16933	0.0221061	0.85288	UP	AT4G33580	BCA5	beta carbonic anhydrase 5
BnaA02G0091300ZS	0.765459	0.85815	0.491676	0.508726	0.022114	0.698624	UP	AT5G22330	RVB1	P-loop containing nucleoside triphosphate hydrolases superfamily protein
BnaA03G0248500ZS	0.616933	0.69169	0.401889	0.40979	0.0221265	0.689069	UP	AT4G08685	SAH7	Encodes a protein, expressed in leaves, with similarity to pollen allergens.
BnaC07G0212900ZS	1.69938	1.5109	0.863913	0.701429	0.0221296	1.03622	UP	AT5G66631	--	Tetratricopeptide repeat (TPR)-like superfamily protein
BnaC03G0070200ZS	0.743728	0.706073	0.441269	0.507127	0.0221349	0.612292	UP	AT5G14930	SAG101	encodes an acyl hydrolase involved in senescence .
BnaC03G0161500ZS	1.11419	1.01425	0.722785	0.67576	0.0221404	0.605874	UP	AT5G62300	--	Ribosomal protein S10p/S20e family protein
BnaA09G0455200ZS	0.61827	0.646328	0.444473	0.384886	0.0221413	0.608611	UP	AT1G23150	--	--
BnaC02G0077500ZS	0.584082	0.575406	0.298911	0.372383	0.0222035	0.78847	UP	AT5G17010	--	Major facilitator superfamily protein
BnaC04G0602000ZS	0.745889	0.838422	0.439956	0.367064	0.022204	0.97318	UP	AT2G44850	--	--
BnaC09G0206500ZS	0.687304	0.571583	0.172391	0.230914	0.0222101	1.6422	UP	AT1G54890	--	Late embryogenesis abundant (LEA) protein-related
BnaC07G0329500ZS	0.600447	0.541858	0.37499	0.351911	0.0222165	0.652116	UP	AT5G48520	45507	Encodes AUGMIN subunit3 (AUG3), a homolog of animal dim gamma-tubulin 3/human augmin-like complex, subunit 3. Plays a critical role in microtubule organization during plant cell division.
BnaA08G0211400ZS	0.695026	0.61555	0.39596	0.379891	0.0222299	0.75635	UP	AT1G28960	NUDX15	Encodes a ppGpp pyrophosphohydrolase.
BnaA03G0391900ZS	0.584517	0.501101	0.265634	0.269377	0.0222336	1.02088	UP	AT2G13790	SERK4	somatic embryogenesis receptor-like kinase 4
BnaC02G0149400ZS	0.380661	0.328294	0.183634	0.172678	0.0222518	0.992553	UP	AT5G57015	ckl12	casein kinase I-like 12
BnaC04G0401200ZS	0.789174	0.687783	0.407092	0.400124	0.0222606	0.871602	UP	AT5G40270	VEN4	HD domain-containing metal-dependent phosphohydrolase family protein
BnaA06G0185600ZS	0.382675	0.413429	0.265554	0.2323	0.0222962	0.677232	UP	AT5G60410	SIZ1	Encodes a plant small ubiquitin-like modifier (SUMO) E3 ligase that is a focal controller of Pi starvation-dependent responses. Also required for SA and PAD4-mediated R gene signalling, which in turn confers innate immunity in Arabidopsis. Also involved in the regulation of plant growth, drought responses and freezing tolerance. This latter effect is most likely due to SIZ1 dependent ABI5 sumoyla…
BnaA06G0314500ZS	0.706712	0.632277	0.367918	0.409577	0.0223086	0.78424	UP	AT2G17850	--	Rhodanese/Cell cycle control phosphatase superfamily protein
BnaA02G0123500ZS	0.878448	0.703486	0.222293	0.200738	0.0223651	1.90285	UP	AT5G56320	EXPA14	member of Alpha-Expansin Gene Family. Naming convention from the Expansin Working Group (Kende et al, 2004. Plant Mol Bio)
BnaA02G0268700ZS	0.555395	0.628768	0.331943	0.352066	0.0223663	0.79178	UP	AT4G11070	WRKY41	member of WRKY Transcription Factor; Group III
BnaC09G0352000ZS	0.615092	0.54932	0.35793	0.368568	0.022374	0.680571	UP	AT5G53150	--	DNAJ heat shock N-terminal domain-containing protein
BnaA07G0202400ZS	1.12468	1.06538	0.555734	0.687103	0.0223801	0.81733	UP	AT3G58100	PDCB5	Encodes a member of the X8-GPI family of proteins. It localizes to the plasmodesmata and is predicted to bind callose.
BnaA09G0507800ZS	0.983911	0.967294	0.393372	0.546453	0.0224034	1.0539	UP	AT3G54900	CXIP1	A.thaliana PICOT protein.It activates CAX1 gene Calcium transport activity.In other organisms, PICOT proteins appear to play a negative regulatory role in cellular stress responses.
BnaA01G0279500ZS	0.164483	0.184665	0.0905052	0.102943	0.0224064	0.851895	UP	AT3G05930	GLP8	germin-like protein (GLP8)
BnaC08G0486700ZS	1.51145	1.31396	0.703929	0.764716	0.0224164	0.943974	UP	AT1G15040	GAT1_2.1	Encodes a nitrogen regulated putative glutamine amidotransferase that represses shoot branching.
BnaC01G0416400ZS	0.892173	0.760386	0.359786	0.396061	0.0224561	1.12854	UP	AT3G17120	--	--
BnaA06G0139600ZS	0.0878012	0.0989278	0.0563144	0.051908	0.0224573	0.786947	UP	--	--	--
BnaC03G0268000ZS	0.862434	0.779056	0.487336	0.410398	0.0224864	0.870647	UP	AT2G47460	PFG1	MYB12 belongs to subgroup 7 of the R2R3-MYB family. It strongly activates the promoters of chalcone synthase (CHS), flavanone 3-hydroxylase (F3H), flavonol synthase (FLS) and - to a lesser extent - chalcone flavanone isomerase (CHI), but cannot activate the promoters of flavonoid-3'hydroxylase (F3'H) and dihydroflavonol 4-reductase (DF). The activation requires a functional MYB recognition elemen…
BnaA03G0233800ZS	0.579266	0.50634	0.188553	0.0892168	0.0224878	1.96654	UP	AT2G27480	--	Calcium-binding EF-hand family protein
BnaC03G0464300ZS	0.173028	0.199438	0.0929718	0.100128	0.022491	0.94776	UP	AT1G63050	LPLAT2	Encodes a lysophosphatidylcholine acyltransferase (LPCAT). Participates in the Lands cycle in developing seeds. Involved in triacylglycerol biosynthesis.
BnaC04G0134900ZS	1.067	0.923326	0.399527	0.254905	0.0225041	1.60469	UP	AT2G33470	GLTP1	glycolipid transfer protein 1
BnaC09G0581200ZS	0.801436	0.74675	0.498682	0.419546	0.0225314	0.753656	UP	AT5G06730	--	Peroxidase superfamily protein
BnaA03G0016700ZS	0.69255	0.638683	0.354171	0.42003	0.0225445	0.781983	UP	AT3G10640	VPS60.1	SNF7 family protein
BnaA10G0138400ZS	0.634434	0.562652	0.360875	0.333694	0.0225448	0.785336	UP	AT5G58250	LCAA/YCF54	--
BnaC01G0115900ZS	0.683237	0.805454	0.348097	0.338085	0.0225619	1.11738	UP	AT4G18460	--	D-Tyr-tRNA(Tyr) deacylase family protein
BnaC06G0367700ZS	0.743341	0.717188	0.431036	0.506551	0.022566	0.639466	UP	AT1G70160	--	--
BnaC08G0494600ZS	0.400695	0.461663	0.201123	0.152943	0.0225829	1.28427	UP	AT1G14030	LSMT-L	Encodes a lysine methyltransferase whose main soluble physiological substrates are chloroplastic fructose 1,6-bisphosphate aldolases, FBA1, FBA2, and FBA3. Lysines near the C-terminal end of the target proteins are trimethylated.
BnaC01G0228300ZS	0.422956	0.375101	0.137725	0.191179	0.0225965	1.27882	UP	AT4G17350	FL5	Plant protein of unknown function (DUF828) with plant pleckstrin homology-like region
BnaA05G0005400ZS	1.15558	1.17514	0.677062	0.80532	0.0225998	0.652858	UP	AT2G16760	--	Calcium-dependent phosphotriesterase superfamily protein
BnaC07G0330800ZS	0.550863	0.63659	0.31514	0.311528	0.0226191	0.922097	UP	AT5G48657	--	defense protein-related
BnaA05G0497700ZS	0.661379	0.593704	0.366673	0.309471	0.0226345	0.892381	UP	AT3G10020	HUP26	--
BnaC07G0310400ZS	0.687304	0.665653	0.278639	0.382358	0.0226529	1.0334	UP	AT3G27870	ALA8	ATPase E1-E2 type family protein / haloacid dehalogenase-like hydrolase family protein
BnaC02G0000800ZS	0.639045	0.703738	0.429833	0.456351	0.0226537	0.599549	UP	AT5G01840	OFP1	Encodes a member of the plant specific ovate protein family. Members of this family have been shown to bind to KNOX and BELL- like TALE class homeodomain proteins. This interaction may mediate relocalization of the TALE homeodomain from the nucleus to the cytoplasm. Functions as a transcriptional repressor that suppresses cell elongation.
BnaC07G0351200ZS	1.09806	1.11342	0.248446	0.475823	0.0226856	1.61042	UP	AT5G26670	AtPAE10	Pectinacetylesterase family protein
BnaA09G0204200ZS	0.570991	0.547156	0.272489	0.345356	0.0226862	0.855794	UP	AT5G45760	--	Transducin/WD40 repeat-like superfamily protein
BnaC09G0600800ZS	0.569155	0.641052	0.35054	0.371353	0.0226979	0.745398	UP	AT5G04510	PDK1	Encodes 3-phosphoinositide-dependent protein kinase that contains pleckstrin homology domain and binds 3-phosphoinositides. It activates the protein kinase AGC2-1 in a phosphatidic acid dependent manner. Phosphorylates S6K1. Interacts with PID, and transphosphorylation by PDK1 increases PID autophosphorylation.
BnaA01G0267600ZS	1.3595	1.1364	0.51507	0.524377	0.0227077	1.26375	UP	AT1G59740	NPF4.3	Major facilitator superfamily protein
BnaC04G0294900ZS	0.463193	0.537594	0.240873	0.259685	0.0227363	0.999526	UP	AT3G57930	--	--
BnaC08G0018000ZS	0.689337	0.687968	0.381746	0.270468	0.0227551	1.07843	UP	AT1G05500	SYTE	Encodes a endomembrane-localized synaptotagmin. Synaptotagmin family proteins are calcium sensors that regulate exocytosis in mammalian cells.
BnaC09G0543400ZS	0.59386	0.542656	0.354131	0.30083	0.0227559	0.795138	UP	AT5G11340	NAA50	Acyl-CoA N-acyltransferases (NAT) superfamily protein
BnaA06G0312000ZS	0.933351	0.841252	0.549065	0.583965	0.0227643	0.64731	UP	AT2G18390	TTN5	Encodes a member of ARF-like GTPase family. A thaliana has 21 members, in two subfamilies, ARF and ARF-like (ARL) GTPases. Mutant has abnormal mitosis and cell cycle control during seed development.
BnaC01G0110600ZS	0.832695	0.747054	0.402956	0.469665	0.0227656	0.856269	UP	AT4G18030	--	S-adenosyl-L-methionine-dependent methyltransferases superfamily protein
BnaA08G0148800ZS	0.655993	0.570945	0.333633	0.338448	0.0227677	0.868354	UP	AT4G31720	TAFII15	Arabidopsis thaliana putative TBP-associated 15 kDa subunit protein (TAFII15)
BnaA03G0474200ZS	0.624858	0.70283	0.41271	0.404677	0.022791	0.699825	UP	AT1G52360	b?1-COP	Coatomer, beta' subunit
BnaC08G0183900ZS	0.58941	0.639151	0.320459	0.383801	0.0227924	0.80279	UP	AT1G08480	SDH6	predicted to encode subunit 6 of mitochondrial complex II and to participate in the respiratory chain
BnaC04G0391100ZS	0.475826	0.461663	0.211179	0.118956	0.0227965	1.50575	UP
BnaA02G0321700ZS	0.64042	0.562737	0.344055	0.311908	0.0228015	0.875138	UP	AT2G02230	PP2-B1	phloem protein 2-B1
BnaC04G0590500ZS	0.605596	0.553995	0.3285	0.256945	0.0228054	0.986012	UP	AT2G42950	--	Magnesium transporter CorA-like family protein
BnaC06G0262000ZS	0.601043	0.61555	0.364763	0.428241	0.022824	0.617447	UP	AT1G77230	--	Tetratricopeptide repeat (TPR)-like superfamily protein
BnaA09G0653500ZS	0.608987	0.532509	0.293759	0.32069	0.0228585	0.89356	UP	AT1G11310	PMR2	A member of a large family of seven-transmembrane domain proteins specific to plants, homologs of the barley mildew resistance locus o (MLO) protein. The Arabidopsis genome contains 15 genes encoding MLO proteins, with localization in plasma membrane. Phylogenetic analysis revealed four clades of closely-related AtMLO genes. ATMLO2 belongs to the clade IV, with AtMLO3, AtMLO6 and AtMLO12. The gen…
BnaC03G0544600ZS	0.93913	0.923326	0.508099	0.354828	0.0229494	1.10989	UP	AT5G63320	NPX1	Encodes NPX1 (Nuclear Protein X1), a nuclear factor regulating abscisic acid responses.
BnaC06G0218200ZS	0.614436	0.590356	0.335104	0.402915	0.0229511	0.707055	UP	AT3G59350	MAZ	Protein kinase superfamily protein
BnaC07G0118900ZS	0.814779	0.886545	0.586745	0.532994	0.0229536	0.603495	UP	AT2G26230	UOX	uricase / urate oxidase / nodulin 35, putative
BnaC05G0137600ZS	0.895672	0.747454	0.279501	0.335875	0.0229892	1.4169	UP	AT1G16500	--	--
BnaA07G0011400ZS	0.677137	0.795086	0.307969	0.351017	0.0230179	1.15968	UP	AT2G19490	RECA2	recA DNA recombination family protein
BnaA05G0086500ZS	1.08356	0.977639	0.675772	0.625169	0.023022	0.66393	UP	AT2G36330	CASPL4A3	Uncharacterised protein family (UPF0497)
BnaC06G0173700ZS	0.689127	0.610586	0.161616	0.270249	0.0230378	1.58954	UP	AT5G41685	--	Mitochondrial outer membrane translocase complex, subunit Tom7
BnaA08G0008200ZS	0.719777	0.643787	0.438751	0.427377	0.0230383	0.65473	UP	AT1G55150	RH20	DEA(D/H)-box RNA helicase family protein
BnaA02G0378600ZS	0.466867	0.546133	0.251455	0.248053	0.0230509	1.02005	UP	AT5G25940	--	early nodulin-related
BnaA01G0020000ZS	0.590238	0.671711	0.369563	0.363772	0.0230526	0.78311	UP	AT4G36800	RCE1	RUB1 conjugating enzyme that conjugates CUL1 and is involved in auxin response and embryogenesis. RCE1 protein physically interacts with RBX1, which may be the E3 for CUL1.
BnaA01G0215800ZS	0.645187	0.659518	0.391072	0.296673	0.023123	0.923779	UP	AT3G49850	TRB3	Encodes a telomeric DNA binding protein. In vitro, the protein preferentially binds double-stranded telomeric repeats, but it can also bind to the single G-rich telomeric strand.
BnaC03G0704000ZS	0.649362	0.578244	0.332411	0.371433	0.0231578	0.80252	UP	AT1G36280	--	L-Aspartase-like family protein
BnaC03G0288300ZS	0.876273	0.78063	0.516552	0.522084	0.0231793	0.673799	UP	AT5G49980	AFB5	auxin F-box protein 5
BnaC02G0387900ZS	1.15558	1.18186	0.484673	0.666601	0.0231833	1.02169	UP	--	--	--
BnaC07G0287500ZS	0.488686	0.550607	0.322137	0.314883	0.023187	0.706191	UP	AT2G03870	LSM7	Small nuclear ribonucleoprotein family protein
BnaC03G0186100ZS	0.831066	0.748477	0.51173	0.526583	0.0232049	0.605265	UP	AT2G33150	PKT3	Encodes an organellar (peroxisome, glyoxysome) 3-ketoacyl-CoA thiolase, involved in fatty acid b-oxidation during germination and subsequent seedling growth. Mutants have defects in glyoxysomal fatty acid beta-oxidation. EC2.3.1.16 thiolase.
BnaC08G0436100ZS	0.83456	0.894559	0.51398	0.403214	0.0232368	0.914738	UP	AT2G23960	--	Class I glutamine amidotransferase-like superfamily protein
BnaC01G0471200ZS	0.931928	0.856175	0.466134	0.557438	0.0232438	0.804818	UP	AT5G05300	IDL6	--
BnaC06G0170200ZS	0.633275	0.564666	0.297982	0.217115	0.0232811	1.21764	UP	AT5G41080	GDPD2	Encodes a member of the glycerophosphodiester phosphodiesterase (GDPD) family.
BnaA03G0322500ZS	0.66424	0.749453	0.37099	0.291204	0.0232896	1.09414	UP	AT3G11170	FADD	Chloroplastic enzyme responsible for the synthesis of 16:3 and 18:3 fatty acids from galactolipids, sulpholipids and phosphatidylglycerol. Uses ferredoxin as electron donor. Gene expression is induced by wounding in shoot and root. The wound-response in shoot is independent of jasmonic acid mediated pathway whereas the root response is mediated by jasmonic acid.
BnaA05G0399300ZS	0.683237	0.760625	0.475952	0.462154	0.0233163	0.622109	UP	AT3G15410	--	Leucine-rich repeat (LRR) family protein
BnaA03G0223500ZS	0.533502	0.602169	0.266536	0.317835	0.0233299	0.958587	UP	AT2G46220	--	Uncharacterized conserved protein (DUF2358)
BnaC03G0325300ZS	0.160179	0.149613	0.105589	0.0916281	0.0233461	0.651512	UP	AT4G08500	MEKK1	Encodes a member of the A1 subgroup of the MEKK (MAPK/ERK kinase kinase) family. MEKK is another name for Mitogen-Activated Protein Kinase Kinase Kinase (MAPKKK or MAP3K). This subgroup has four members: At4g08500 (MEKK1, also known as ARAKIN, MAP3Kb1, MAPKKK8), At4g08480 (MEKK2, also known as MAP3Kb4, MAPKKK9), At4g08470 (MEKK3, also known as MAP3Kb3, MAPKKK10) and At4g12020 (MEKK4, also known a…
BnaC03G0099600ZS	0.783713	0.667464	0.153028	0.264175	0.0233511	1.7984	UP	AT5G20165	--	--
BnaA04G0299700ZS	1.87049	2.06649	0.985501	0.693909	0.0233748	1.22913	UP	AT2G47770	TSPO	Encodes a membrane-bound protein designated AtTSPO (Arabidopsis thaliana TSPO-related). AtTSPO is related to the bacterial outer membrane tryptophan-rich sensory protein (TspO) and the mammalian mitochondrial 18 kDa Translocator Protein (18 kDa TSPO), members of the TspO/MBR domain-containing membrane proteins. Mainly detected in dry seeds, but can be induced in vegetative tissues by osmotic or s…
BnaA04G0005300ZS	0.967646	0.903398	0.335966	0.486141	0.023401	1.18644	UP	AT3G62810	mzm1	complex 1 family protein / LVR family protein
BnaC07G0140500ZS	0.753391	0.61555	0.247475	0.227788	0.0234255	1.52626	UP	AT1G05540	AtDOA1	Protein of unknown function (DUF295)
BnaC07G0425600ZS	1.23227	1.31904	0.718008	0.535301	0.0234323	1.02549	UP	AT4G18780	LEW2	Encodes a member of the cellulose synthase family involved in secondary cell wall biosynthesis. Mutants have abnormal xylem formation, reduced cellulose content, and enhanced drought and osmotic stress tolerance. Mediates resistance towards bacterial pathogens via ABA. Confers resistance towards bacterial and fungal pathogens, independent of salicylic acid, ethylene and jasmonate signaling.
BnaC07G0026200ZS	0.600633	0.679121	0.39098	0.381731	0.0234438	0.727866	UP	AT2G19450	TAG1	Encodes Acyl-CoA:diacylglycerol acyltransferase (DGAT) catalyzes the final step of the triacylglycerol synthesis pathway. An insertion mutation in the TAG1 gene results in altered lipid phenotype. Role in senescence and seed development. Its preferred substrate is linolenoyl-CoA (C18:3-CoA).
BnaA06G0382000ZS	0.651021	0.584889	0.306691	0.364734	0.0234471	0.880274	UP	AT3G27560	ATN1	encodes a protein with kinase domains, including catalytic domains for serine/threonine as well as tyrosine kinases. a member of multi-gene family and is expressed in all tissues examined.
BnaA10G0275200ZS	0.464962	0.478662	0.265009	0.319373	0.0235	0.691302	UP	AT5G05370	--	Cytochrome b-c1 complex, subunit 8 protein
BnaA01G0140100ZS	0.799263	0.783552	0.452752	0.328661	0.023505	1.01833	UP	AT4G24380	--	--
BnaA09G0471600ZS	0.815701	0.704643	0.408733	0.38931	0.0235082	0.92986	UP	AT3G50560	--	NAD(P)-binding Rossmann-fold superfamily protein
Bnascaffold0027G0048500ZS	0.543801	0.713479	0.0879912	0.082354	0.0235383	2.88377	UP	AT5G20040	IPT9	Encodes tRNA isopentenyltransferase AtIPT9.
BnaC04G0314000ZS	1.11959	0.923326	0.39596	0.338085	0.0235791	1.47669	UP	AT3G55605	--	Mitochondrial glycoprotein family protein
BnaA03G0468400ZS	0.54074	0.619964	0.316608	0.330102	0.0235856	0.84381	UP	AT4G22780	ACR7	Member of a family of ACT domain containing proteins . ACT domains are involved in amino acid binding .
BnaC03G0154100ZS	0.412018	0.408551	0.145641	0.0475823	0.0235997	2.08636	UP	AT5G53050	--	alpha/beta-Hydrolases superfamily protein
BnaA09G0487800ZS	0.805244	0.677106	0.263974	0.321181	0.0236008	1.341	UP	AT3G52320	--	F-box and associated interaction domains-containing protein
BnaA02G0240600ZS	1.02916	0.919258	0.622145	0.623579	0.0236031	0.64532	UP	AT1G80750	RPL7A	Ribosomal protein L30/L7 family protein
BnaA02G0019900ZS	1.14686	1.00027	0.603368	0.606675	0.02362	0.827353	UP	AT5G05560	EMB2771	Encodes a subunit of the Arabidopsis thaliana E3 ubiquitin ligase complex that plays a synergistic role with APC4 both in female gametogenesis and in embryogenesis.
BnaC01G0442000ZS	0.65113	0.548769	0.257535	0.203924	0.0236216	1.37864	UP	AT3G14080	LSM1B	Small nuclear ribonucleoprotein family protein
BnaC09G0466100ZS	0.802512	0.855161	0.480345	0.561203	0.0236579	0.67043	UP	AT5G19740	LAMP1	Peptidase M28 family protein
BnaC04G0535400ZS	0.858238	0.948797	0.377718	0.49304	0.0236594	1.05328	UP	AT2G34710	PHB-1D	Dominant PHB mutations cause transformation of abaxial leaf fates into adaxial leaf fates. Encodes a member of HD-Zip family which contains homeodomain-leucine zipper domains and domain similar to a mammalian sterol binding domain. Has overlapping functions with PHAVOLUTA, REVOLUTA and CORONA.
BnaA09G0655300ZS	0.470161	0.53247	0.289519	0.304276	0.0236632	0.755752	UP	AT1G10865	--	--
BnaC03G0298100ZS	0.770252	0.807589	0.550777	0.472324	0.0236632	0.625002	UP	AT4G09460	MYB6	Encodes myb6 DNA-binding protein.
BnaA03G0207200ZS	0.799143	0.886619	0.561877	0.53039	0.0236707	0.626075	UP	AT2G42590	GRF9	14-3-3 gene. Binds calcium and displays induced structural changes.
BnaC01G0440500ZS	0.915965	1.00528	0.43478	0.551045	0.0236953	0.962636	UP	AT3G14280	--	--
BnaA01G0280200ZS	0.587189	0.523218	0.351965	0.333076	0.023718	0.696827	UP	AT1G61580	RPL3B	R-protein L3 B
BnaC07G0248100ZS	1.39711	1.17339	0.571045	0.497065	0.0237254	1.26699	UP	AT5G46295	--	--
BnaA01G0394800ZS	0.455138	0.401965	0.260818	0.255946	0.0237411	0.729962	UP	AT3G05890	RCI2B	Low temperature and salt responsive protein family
BnaA10G0104800ZS	0.636819	0.552786	0.294001	0.325088	0.0237878	0.942265	UP	AT5G54170	--	Polyketide cyclase/dehydrase and lipid transport superfamily protein
BnaC05G0525200ZS	0.5382	0.49356	0.267822	0.321181	0.0238111	0.808762	UP	AT3G06500	A/N-InvC	Encodes an alkaline/neutral invertase which localizes in mitochondria. It may be modulating hormone balance in relation to the radicle emergence. Mutants display severely reduced shoot growth and reduced oxygen consumption. Mutant root development is not affected as reported for A/N-InvA mutant (inva) plants.
BnaC01G0341100ZS	0.538671	0.564013	0.390818	0.337767	0.0238198	0.597849	UP	AT1G61250	SCAMP1	Encodes a putative secretory carrier membrane protein (SC3).
BnaA05G0413200ZS	0.353619	0.341564	0.229832	0.187925	0.0238265	0.734731	UP	AT1G14800	--	Nucleic acid-binding, OB-fold-like protein
BnaC06G0451100ZS	0.594782	0.692494	0.33344	0.332256	0.0238352	0.951386	UP	AT1G79580	URP7	NAC-domain protein. Involved in root cap development. Involved in a regulatory feedback loop with FEZ. FEZ activates SMB in hte root cap daughter cells soon after division, and SMB in turn represses FEZ expression in these cells, thereby preventing further stem cell divisions.
BnaA06G0054800ZS	0.375987	0.411455	0.236101	0.192079	0.0238778	0.878961	UP	AT1G09140	SR30	Encodes a serine-arginine rich RNA binding protein involved in regulation of splicing (including splicing of itself). Exists as 3 alternative spliced forms that are differentially expressed. Barta et al (2010) have proposed a nomenclature for Serine/Arginine-Rich Protein Splicing Factors (SR proteins): Plant Cell. 2010, 22:2926.
BnaC08G0528000ZS	0.696917	0.671157	0.476506	0.404252	0.0238935	0.635328	UP	AT1G09020	SNF4	putative activator subunit of SNF1-related protein kinase
BnaC05G0370300ZS	0.909755	0.991951	0.278549	0.444926	0.0239203	1.39428	UP	AT3G21305	--	--
BnaA01G0039000ZS	0.639391	0.618583	0.364763	0.434028	0.0239206	0.655211	UP	AT3G25580	--	Thioredoxin superfamily protein
BnaC09G0527300ZS	0.65426	0.543133	0.25008	0.226474	0.0239503	1.32919	UP	AT5G13330	Rap2.6L	encodes a member of the ERF (ethylene response factor) subfamily B-4 of ERF/AP2 transcription factor family. The protein contains one AP2 domain. There are 7 members in this subfamily.
BnaA03G0115100ZS	0.624064	0.722088	0.330062	0.362033	0.023961	0.959799	UP	AT5G56670	RPS30C	Ribosomal protein S30 family protein
BnaC06G0411600ZS	0.620048	0.608279	0.386549	0.302224	0.0240084	0.834594	UP	AT1G74950	TIFY10B	TIFY domain/Divergent CCT motif family protein
BnaA08G0143600ZS	0.475826	0.543133	0.0942763	0.18893	0.0240248	1.84717	UP	AT4G32915	--	--
BnaA02G0389400ZS	0.60651	0.666433	0.381484	0.424549	0.0240793	0.659256	UP	AT5G23450	LCBK1	Encodes a sphingosine kinase that specifically phosphorylates D-erythro-dihydrosphingosine (DHS), but not N-acetyl-DHS or D-threo-DHS. It also also phosphorylates D-erythro-sphingosine, trans-4, trans-8-sphingadienine and phytosphingosine.
BnaC09G0235300ZS	0.822161	0.646328	0.169246	0.183216	0.024081	2.05879	UP	AT3G11170	FADD	Chloroplastic enzyme responsible for the synthesis of 16:3 and 18:3 fatty acids from galactolipids, sulpholipids and phosphatidylglycerol. Uses ferredoxin as electron donor. Gene expression is induced by wounding in shoot and root. The wound-response in shoot is independent of jasmonic acid mediated pathway whereas the root response is mediated by jasmonic acid.
BnaC05G0473300ZS	0.417676	0.425365	0.237087	0.28693	0.0240913	0.685987	UP	AT3G12977	NAC1L	NAC (No Apical Meristem) domain transcriptional regulator superfamily protein
BnaC07G0532000ZS	0.653094	0.608044	0.334796	0.404001	0.0240927	0.771477	UP	AT4G36470	CLAMT	S-adenosyl-L-methionine-dependent methyltransferases superfamily protein
BnaC01G0473100ZS	0.94933	0.963961	0.561826	0.668768	0.0240972	0.636702	UP	AT3G10720	PMEI-PME25	Plant invertase/pectin methylesterase inhibitor superfamily
BnaA10G0142900ZS	0.508641	0.598914	0.266604	0.269673	0.0240988	1.04633	UP	AT5G58700	PLC4	phosphatidylinositol-speciwc phospholipase C4
BnaC08G0528900ZS	0.951652	0.923326	0.211179	0.407848	0.0241271	1.5988	UP	AT1G08860	BON3	Encodes a copine-like protein, which is a member of a newly identified class of calcium-dependent, phospholipid binding proteins that are present in a wide range of organisms. Overexpression of this gene suppresses bon1-1 phenotypes. Double mutant analyses with bon1-1 suggest that BON1 and BON3 have overlapping functions in maintaining cellular homeostasis and inhibiting cell death.
BnaC06G0344000ZS	0.984695	0.882027	0.599089	0.550528	0.0241774	0.699353	UP	AT1G68060	MAP70-1	Encodes a microtubule associated protein (MAP70-1). Expressed in all tissues.
BnaC09G0491600ZS	0.634138	0.612268	0.395726	0.3135	0.0241816	0.813457	UP	AT5G17330	GAD1	Encodes one of two isoforms of glutamate decarboxylase.
BnaC03G0515700ZS	0.740173	0.861771	0.298405	0.379891	0.0242064	1.23984	UP	AT5G65925	--	--
BnaC01G0047800ZS	0.652128	0.668488	0.359453	0.247538	0.0242116	1.12146	UP	AT4G33940	--	RING/U-box superfamily protein
BnaA03G0365900ZS	0.911484	1.05165	0.513522	0.434447	0.0242224	1.05025	UP	AT3G21140	ONE1	Pyridoxamine 5'-phosphate oxidase family protein
BnaA02G0377600ZS	0.768642	0.685899	0.445822	0.394432	0.0242317	0.791666	UP	AT5G26740	--	Protein of unknown function (DUF300)
BnaC05G0049200ZS	0.765183	0.861698	0.498204	0.512942	0.0242326	0.686118	UP	AT1G06800	PLA-I{gamma}1	Encodes a lipase that hydrolyzes phosphatidylcholine, glycolipids as well as triacylglycerols.
BnaA09G0646500ZS	0.747022	0.671121	0.468714	0.470778	0.0242521	0.59405	UP	AT1G12580	PEPKR1	phosphoenolpyruvate carboxylase-related kinase 1
BnaC07G0182600ZS	0.616133	0.652923	0.442646	0.382358	0.0243756	0.621284	UP	AT1G78190	TRM112a	Trm112p-like protein
BnaA03G0013800ZS	0.648853	0.654022	0.245557	0.356867	0.0243858	1.11285	UP	AT5G04110	GYRB3	DNA GYRASE B3
BnaC06G0458600ZS	0.750598	0.74285	0.476343	0.374382	0.0243894	0.811882	UP	AT1G80110	PP2-B11	phloem protein 2-B11
BnaC09G0476700ZS	1.12083	0.897678	0.287971	0.316657	0.0243996	1.73917	UP	AT5G18790	--	Ribosomal protein L33 family protein
BnaC03G0300700ZS	0.685416	0.633444	0.443782	0.385803	0.0244019	0.668831	UP	AT4G10040	CYTC-2	Encodes cytochrome c. Promoter directs preferential expression in vascular tissues of cotyledons, leaves, roots, and hypocotyls, and in anthers.
BnaA02G0043000ZS	0.75758	0.83588	0.5113	0.545444	0.0244064	0.592537	UP	AT5G11960	--	Protein of unknown function (DUF803)
BnaC07G0255700ZS	0.62697	0.565139	0.281572	0.346671	0.0244284	0.924122	UP	AT4G38150	--	Pentatricopeptide repeat (PPR) superfamily protein
BnaA02G0379800ZS	0.410516	0.483647	0.218461	0.196641	0.0244507	1.10707	UP	AT5G11440	IPD1	Interacts with PAB (poly A binding protein) in yeast two hybrid experiments. Contains PAM2 motif, a PABC interacting domain.
BnaA06G0426900ZS	0.572411	0.507125	0.315033	0.335384	0.0244676	0.730975	UP	AT5G46020	MUSE7	--
BnaC02G0532500ZS	0.473482	0.432295	0.30942	0.280472	0.0244697	0.618706	UP	AT5G62460	RZFP	RING/FYVE/PHD zinc finger superfamily protein
BnaC08G0378800ZS	0.784909	0.770128	0.447699	0.537336	0.0244738	0.658702	UP	AT3G57870	SCE1A	Encodes a SUMO ligase that directs the attachment of the small protein SUMO to target proteins via an isopeptide bond. This enzyme is localized to the nucleus and plants with reduced levels of this protein show higher sensitivity to ABA in root growth inhibition assays. It has high similarity to the yeast UBC9 SUMO ligase and is sometimes referred to by that name.
BnaA02G0412100ZS	0.798055	0.718238	0.421531	0.32892	0.0245508	1.01472	UP	AT5G65207	--	--
BnaC05G0029000ZS	0.729599	0.791422	0.361227	0.22539	0.0245743	1.37455	UP	AT1G04590	--	--
BnaA09G0023000ZS	1.28829	1.27794	0.5132	0.725247	0.0246246	1.05112	UP	AT4G02075	PIT1	RING/FYVE/PHD zinc finger superfamily protein
BnaA07G0011800ZS	0.753755	0.670195	0.454	0.442683	0.0246347	0.667228	UP	AT2G19450	TAG1	Encodes Acyl-CoA:diacylglycerol acyltransferase (DGAT) catalyzes the final step of the triacylglycerol synthesis pathway. An insertion mutation in the TAG1 gene results in altered lipid phenotype. Role in senescence and seed development. Its preferred substrate is linolenoyl-CoA (C18:3-CoA).
BnaC09G0130800ZS	0.550956	0.579342	0.246375	0.128988	0.0246496	1.59034	UP	AT3G53900	UPP	Encodes UPP, a plastidial uracil phosphoribosyltransferase (UPRT) involved in uracil salvage. Loss-of-function mutation causes dramatic growth retardation, a pale-green to albino phenotype, abnormal root morphology and chloroplastic disorders.
BnaC04G0515700ZS	0.73057	0.65904	0.429816	0.464123	0.0246713	0.636433	UP	AT2G32020	--	Acyl-CoA N-acyltransferases (NAT) superfamily protein
BnaA04G0147200ZS	0.649438	0.557373	0.263047	0.306883	0.0246882	1.08234	UP	AT2G22540	SVP	Encodes a nuclear protein that acts as a floral repressor and that functions within the thermosensory pathway. SVP represses FT expression via direct binding to the vCArG III motif in the FT promoter.
BnaC01G0328600ZS	1.17126	0.923326	0.175982	0.267651	0.0246909	2.23923	UP	AT1G59850	--	ARM repeat superfamily protein
BnaC05G0386000ZS	0.996062	1.0244	0.536649	0.664788	0.0247262	0.749924	UP	AT3G20470	GRP5	encodes a glycine-rich protein that is expressed more abundantly in immature seed pods than in stems and leaves. Expression is not detected in roots or flowers.
BnaA03G0337300ZS	1.45252	1.3171	0.863913	0.733784	0.0247344	0.793693	UP	AT3G14240	--	Subtilase family protein
BnaC08G0338200ZS	0.375456	0.387409	0.231673	0.271567	0.0247791	0.600181	UP	AT3G53670	--	--
BnaA06G0448700ZS	0.863807	0.827809	0.574531	0.478622	0.0247909	0.683687	UP	AT4G39040	CFM4	RNA-binding CRS1 / YhbY (CRM) domain protein
BnaC03G0107100ZS	0.820389	0.909121	0.3942	0.495649	0.0248102	0.95873	UP	AT5G22330	RVB1	P-loop containing nucleoside triphosphate hydrolases superfamily protein
BnaC08G0187500ZS	0.647515	0.717051	0.420568	0.356867	0.0248402	0.811648	UP	AT1G08730	XIC	Class XI myosin gene
BnaC08G0491500ZS	0.512947	0.456476	0.230598	0.278357	0.0248405	0.92959	UP	AT1G14370	PBL2	Encodes protein kinase APK2a. Protein is N-myristoylated.
BnaA05G0448400ZS	0.803857	0.804951	0.515107	0.404337	0.0248632	0.807159	UP	AT1G66240	ATX1	homolog of anti-oxidant 1
BnaA09G0458200ZS	0.523754	0.589402	0.336175	0.353918	0.0248773	0.689794	UP	AT1G22840	CYTC-1	Encodes cytochrome c. Contains two site II (TGGGCC/T) elements, which interact with a TCP-domain transcription factor, and a downstream internal telomeric repeat, and are required for expression of the Cytc-1 gene. Promoter directs preferential expression in root and shoot meristems and in anthers.
BnaC06G0459400ZS	0.491175	0.497175	0.251403	0.158608	0.0248913	1.26936	UP	AT1G79915	--	Putative methyltransferase family protein
BnaC01G0059500ZS	1.26887	1.0912	0.441556	0.566789	0.0248973	1.22684	UP	AT4G32780	FL4	phosphoinositide binding
BnaA05G0399200ZS	0.613508	0.541895	0.319835	0.350778	0.0249309	0.784845	UP	AT3G15430	--	Regulator of chromosome condensation (RCC1) family protein
BnaC07G0525000ZS	1.04682	0.912066	0.561852	0.559633	0.0249364	0.804621	UP	AT4G35160	ASMT1	O-methyltransferase family protein
BnaC08G0198700ZS	0.924844	0.910502	0.308799	0.477116	0.0249459	1.22361	UP	AT1G10030	ERG28	homolog of yeast ergosterol28
BnaC03G0000500ZS	0.749426	0.84169	0.508025	0.51002	0.0249661	0.644238	UP	AT1G01470	LSR3	Encodes late-embryogenesis abundant protein whose mRNA levels are induced in response to wounding and light stress. Might be involved in protection against dessication.
BnaC04G0359500ZS	0.812646	0.715577	0.460092	0.42299	0.0249779	0.791237	UP	AT4G13720	--	Inosine triphosphate pyrophosphatase family protein
BnaC01G0054400ZS	0.815701	0.80791	0.381295	0.500541	0.0249849	0.880623	UP	AT4G33140	--	Haloacid dehalogenase-like hydrolase (HAD) superfamily protein
BnaA04G0276700ZS	0.658836	0.820734	0.226263	0.243319	0.0250098	1.65573	UP	AT2G43480	--	Peroxidase superfamily protein
BnaA05G0325200ZS	0.614357	0.682458	0.26271	0.349584	0.025032	1.08267	UP	AT1G32350	AOX1D	alternative oxidase 1D
BnaA06G0042500ZS	0.418623	0.374942	0.25981	0.262489	0.0250533	0.603471	UP	AT1G65486	STMP4	--
BnaA09G0390000ZS	0.470228	0.489474	0.337886	0.287477	0.0250711	0.617893	UP	AT1G32700	--	PLATZ transcription factor family protein
BnaC06G0006100ZS	0.711108	0.725038	0.513931	0.436829	0.0250795	0.595049	UP	--	--	--
BnaC06G0281900ZS	0.523408	0.61555	0.251403	0.283395	0.0250873	1.09065	UP	AT1G73805	SARD1	Encodes SAR Deficient 1 (SARD1), a key regulator for ICS1 (Isochorismate Synthase 1) induction and salicylic acid (SA) synthesis.
BnaC08G0346000ZS	0.522568	0.606196	0.308778	0.295506	0.0250873	0.901447	UP	AT3G54620	BZO2H4	bZIP transcription factor-like protein mRNA
BnaA02G0407300ZS	1.03423	1.16243	0.702493	0.662357	0.0251037	0.686574	UP	AT5G64130	--	cAMP-regulated phosphoprotein 19-related protein
BnaA05G0424300ZS	0.659668	0.753735	0.402764	0.419319	0.025112	0.781817	UP	AT3G12670	emb2742	CTP synthase family protein
BnaC01G0105200ZS	0.668006	0.744049	0.461775	0.423612	0.0251184	0.673417	UP	AT4G17530	RAB1C	AtRabD2c encodes a Rab GTPase, which plays important roles in pollen development, germination and tube elongation.
BnaA07G0290100ZS	0.740945	0.839387	0.469475	0.48937	0.0251341	0.720858	UP	AT1G66880	--	Protein kinase superfamily protein
BnaA07G0387800ZS	0.508417	0.565537	0.316768	0.349584	0.0251398	0.688574	UP	AT1G80550	--	Pentatricopeptide repeat (PPR) superfamily protein
BnaC05G0002500ZS	0.541913	0.60265	0.333799	0.370794	0.0251464	0.699935	UP	AT1G02145	SBI2	homolog of asparagine-linked glycosylation 12
BnaA06G0150400ZS	0.670688	0.641468	0.422358	0.338085	0.0251546	0.787028	UP	AT1G21190	LSM3A	Small nuclear ribonucleoprotein family protein
BnaA01G0093600ZS	1.12568	1.31433	0.643838	0.62014	0.0251556	0.94892	UP	AT4G18422	--	--
BnaC05G0218600ZS	0.444104	0.346247	0.0894825	0.0948635	0.0251709	2.10008	UP	AT5G49150	GEX2	Encodes a transmembrane domain containing protein expressed in sperm cells. Target promoter of the male germline-specific transcription factor DUO1.
BnaC05G0113100ZS	1.06816	1.1708	0.664084	0.749531	0.0251996	0.66344	UP	AT1G14200	USR1	RING/U-box superfamily protein
BnaC03G0666400ZS	0.913071	0.777537	0.409428	0.43217	0.0252147	1.00634	UP	AT4G14350	NDR1	AGC (cAMP-dependent, cGMP-dependent and protein kinase C) kinase family protein
BnaA10G0094300ZS	1.05568	1.11141	0.669591	0.772819	0.0252183	0.587277	UP	AT5G52880	--	F-box family protein
BnaC08G0267600ZS	0.91525	0.993452	0.579847	0.655864	0.0252703	0.62725	UP	AT1G77350	--	--
BnaC08G0337200ZS	1.21119	1.56255	0.316768	0.277564	0.0253194	2.22249	UP	AT3G53560	--	Tetratricopeptide repeat (TPR)-like superfamily protein
BnaC02G0399700ZS	0.6617	0.74359	0.435357	0.453323	0.0253394	0.661131	UP	AT5G45280	PAE11	Pectinacetylesterase family protein
BnaA03G0504200ZS	0.927378	0.807669	0.503692	0.481593	0.0253625	0.816362	UP	AT4G28400	--	Protein phosphatase 2C family protein
BnaA05G0050000ZS	0.731694	0.769438	0.531639	0.45756	0.0253754	0.601718	UP	AT2G45010	--	PLAC8 family protein
BnaC07G0395900ZS	0.604508	0.675767	0.346465	0.396861	0.0254182	0.784387	UP	AT3G51860	CAX3	cation exchanger 3
BnaA01G0358100ZS	0.928553	1.05034	0.524356	0.593419	0.0254315	0.824067	UP	AT3G13720	PRA8	PRA1 (Prenylated rab acceptor) family protein
BnaA10G0197200ZS	0.874905	0.773773	0.516318	0.489418	0.0254843	0.713058	UP	AT5G17165	--	--
BnaA04G0207400ZS	0.668047	0.613565	0.366043	0.424549	0.025499	0.696953	UP	AT2G31870	TEJ	The gene encodes a poly(ADPribose) glycohydrolase (PARG1). Mutant analysis revealed that PARG1 PARG1 plays a role in abiotic stress responses.
BnaA03G0126500ZS	0.799097	0.790423	0.465591	0.557421	0.0255006	0.635768	UP	AT5G54230	MYB49	Encodes a putative transcription factor (MYB49).
BnaA10G0124900ZS	0.336442	0.33168	0.239336	0.202851	0.025511	0.595456	UP	AT2G35795	PAM18-1	Chaperone DnaJ-domain superfamily protein
BnaC02G0436500ZS	1.04041	1.09079	0.762276	0.657974	0.0255337	0.585519	UP	AT2G02560	TIP120	Arabidopsis thaliana homolog of human CAND1 (cullin-associated and neddylation-dissociated). Putative similarity to TBP-interacting protein TIP120. Ubiquitously expressed in plant tissues throughout development. T-DNA insertion mutant plants were completely sterile and resistant to sirtinol and auxin, but not to gibberellins or brassinolide. Displayed developmental phenotypes similar to those of …
BnaA06G0088500ZS	0.700948	0.65241	0.457727	0.391403	0.0255543	0.672485	UP	AT1G13690	ATE1	AtE1 - stimulates the ATPase activity of DnaK/DnaJ
BnaC08G0497500ZS	0.513892	0.5657	0.296165	0.345356	0.0255789	0.750917	UP	AT1G13520	--	Protein of unknown function (DUF1262)
BnaA06G0117500ZS	0.843691	0.964181	0.537815	0.531394	0.0256607	0.757749	UP	AT1G17160	RBSK	pfkB-like carbohydrate kinase family protein
BnaC03G0507300ZS	0.589118	0.675604	0.367268	0.36802	0.0256644	0.782441	UP	AT3G58940	--	F-box/RNI-like superfamily protein
BnaC08G0274600ZS	1.09806	1.27845	0.564781	0.632629	0.0256921	0.988929	UP	AT5G28010	--	Polyketide cyclase/dehydrase and lipid transport superfamily protein
BnaA10G0185700ZS	1.23155	1.13437	0.649781	0.770082	0.0256955	0.73665	UP	AT5G18700	RUK	Encodes a microtubule-associated kinase-like protein RUNKEL (RUK). Contains a putative serine/threonine kinase domain and a microtubule-binding domain. RUK directly binds to microtubules in vitro and colocalizes with mitotic preprophase band, spindle, and phragmoplast in vivo. Required for cell plate expansion in cytokinesis.
BnaA02G0184300ZS	1.17994	1.03372	0.529826	0.373237	0.025696	1.29354	UP	AT1G69840	AtHIR1	SPFH/Band 7/PHB domain-containing membrane-associated protein family
BnaC04G0611500ZS	0.453167	0.450927	0.259912	0.184852	0.0257016	1.02343	UP	AT2G46620	--	P-loop containing nucleoside triphosphate hydrolases superfamily protein
BnaA03G0202400ZS	0.689603	0.769438	0.427704	0.350005	0.0257088	0.907719	UP	AT2G41342	--	--
BnaC01G0043500ZS	0.762921	0.842059	0.442794	0.513467	0.025723	0.747078	UP	AT4G34390	XLG2	extra-large GTP-binding protein 2
BnaC02G0017300ZS	0.668047	0.613201	0.365904	0.424549	0.0257369	0.696798	UP	AT5G04760	DIV2	Duplicated homeodomain-like superfamily protein
BnaC04G0604100ZS	0.778624	0.887117	0.497779	0.503813	0.0257388	0.73387	UP	AT2G45340	--	Leucine-rich repeat protein kinase family protein
BnaA06G0452200ZS	0.537403	0.444564	0.138025	0.190972	0.0257594	1.5776	UP	--	--	--
BnaA09G0604700ZS	0.718765	0.637604	0.381701	0.421752	0.0257628	0.755463	UP	AT2G20560	DNAJ	DNAJ heat shock family protein
BnaC06G0068000ZS	1.08103	1.20489	0.755414	0.698896	0.0257701	0.65244	UP	AT1G52600	--	Peptidase S24/S26A/S26B/S26C family protein
BnaA01G0343400ZS	0.56123	0.571365	0.231869	0.325494	0.0257703	1.02294	UP	AT3G16140	PSAH-1	Encodes subunit H of photosystem I reaction center subunit VI.
BnaC01G0175600ZS	0.922814	0.791422	0.430977	0.460683	0.0257857	0.942999	UP	AT4G24110	HUP40	--
BnaC08G0500600ZS	0.787247	0.77517	0.384829	0.495858	0.025804	0.827079	UP	AT1G13160	--	ARM repeat superfamily protein
BnaA01G0090000ZS	0.779305	0.789408	0.428197	0.528035	0.0258082	0.71415	UP	AT4G17940	--	Tetratricopeptide repeat (TPR)-like superfamily protein
BnaC04G0330200ZS	0.869175	0.905042	0.29565	0.45883	0.0258091	1.23363	UP	AT3G53930	ATG1b	Protein kinase superfamily protein
BnaA04G0086000ZS	3.80661	5.07829	0.351965	0.611773	0.0258146	3.20464	UP
BnaC07G0182500ZS	0.603201	0.660812	0.391213	0.321588	0.0258412	0.826441	UP	AT1G22280	PAPP2C	Encodes a phytochrome-associated protein, PAPP2C (phytochrome-associated protein phosphatase type 2C). PAPP2C interacts in the nucleus with phyA (phytochrome A) and phyB. Functions as a regulator of phytochrome-interacting factor PIF3 by dephosphorylating phytochromes in the nucleus.
BnaA02G0041800ZS	0.67465	0.597201	0.38143	0.4019	0.0258517	0.699238	UP	AT5G11740	ATAGP15	Encodes arabinogalactan protein (AGP15).
BnaC03G0249700ZS	0.856486	0.762682	0.508338	0.455423	0.0259558	0.748506	UP	AT3G59540	--	Ribosomal L38e protein family
BnaA05G0429500ZS	0.674439	0.76078	0.440794	0.392417	0.025979	0.784516	UP	AT2G37270	RPS5B	One of two genes encoding the ribosomal protein S5. Expressed at a lower level compared to ATRPS5A.
BnaA02G0020400ZS	0.846316	0.717768	0.39596	0.381062	0.0259849	1.00929	UP	AT5G05600	JOX2	2-oxoglutarate (2OG) and Fe(II)-dependent oxygenase superfamily protein
BnaC09G0273300ZS	0.65113	0.590323	0.379039	0.419212	0.0259901	0.637116	UP	AT4G05000	VPS28-2	Vacuolar protein sorting-associated protein VPS28 family protein
BnaC02G0182400ZS	0.630612	0.726747	0.375586	0.390324	0.0259906	0.825555	UP	AT5G52820	NLE	Encodes a NOTCHLESS homolog, a non-ribosomal protein involved in the maturation and assembly of the 60S ribosomal subunit, that is required for female gametogenesis.
BnaC04G0034800ZS	0.924461	0.794761	0.4707	0.449389	0.0260022	0.901912	UP	AT1G54380	GEMIN2	spliceosome protein-related
BnaC09G0537100ZS	0.734131	0.604559	0.280681	0.262955	0.0260065	1.30011	UP	AT5G11970	--	Protein of unknown function (DUF3511)
BnaC08G0106300ZS	0.605096	0.691219	0.377105	0.333883	0.0260475	0.86652	UP	AT3G09260	PYK10	Encodes beta-glucosidase.The major constituent of ER bodies. One of the most abundant proteins in Arabidopsis seedlings. Exist in an soluble (inactive) and non-soluble (active) form, most probably formed in a polymerization process. Involved in the mutualistic interaction between Arabidopsis and the endophytic fungus Piriformospora indica.
BnaC09G0361600ZS	0.69211	0.690337	0.493408	0.415458	0.0260522	0.605085	UP	AT5G53940	--	Yippee family putative zinc-binding protein
BnaC02G0136000ZS	0.481113	0.481735	0.292334	0.345814	0.0260749	0.593416	UP	AT5G58350	ZIK2	Encodes a member of the WNK family (9 members in all) of protein kinases, the structural design of which is clearly distinct from those of other known protein kinases, such as receptor-like kinases and mitogen-activated protein kinases. Its transcription is under the control of circadian rhythms.
BnaA04G0262400ZS	0.670177	0.604938	0.397267	0.336475	0.0260752	0.797282	UP	AT2G41000	--	Chaperone DnaJ-domain superfamily protein
Bnascaffold1424G0000100ZS	9.70685	11.0799	5.94906	6.27423	0.0260927	0.766032	UP	--	--	--
BnaA03G0375200ZS	1.9033	1.47732	0.383961	0.21412	0.0261036	2.49887	UP	AT1G63590	--	Receptor-like protein kinase-related family protein
BnaC04G0057600ZS	0.967001	0.935475	0.574876	0.67732	0.0261094	0.603418	UP	AT2G45330	TRPT	RNA 2'-phosphotransferase, Tpt1 / KptA family
BnaA09G0049400ZS	0.926409	0.826923	0.557421	0.578756	0.0261205	0.625912	UP	AT5G48480	--	Lactoylglutathione lyase / glyoxalase I family protein
BnaC06G0086200ZS	0.774126	0.855694	0.555021	0.509926	0.0261609	0.613931	UP	AT1G55190	PRA7	PRA1 (Prenylated rab acceptor) family protein
BnaA10G0270600ZS	0.475826	0.461663	0.27375	0.19826	0.0261638	0.989984	UP	AT5G06080	LBD33	LOB domain-containing protein 33
BnaC08G0341300ZS	0.583968	0.639225	0.326367	0.38931	0.0261712	0.773272	UP	AT3G54090	FLN1	Encodes a fructokinase-like protein (AT3G54090/FLN1, AT1G69200/FLN2), a member of the pfkB-carbohydrate kinase family. FLN1 and FLN2 are potential plastidial thioredoxin z (TRX z) targets. Mutants display mutant chloroplast development, general plant growth and development defects and defects in PEP-dependent transcription.
BnaC05G0093800ZS	0.592139	0.713479	0.193581	0.263533	0.0261817	1.51411	UP	AT1G11740	--	ankyrin repeat family protein
BnaC01G0194300ZS	0.41843	0.467482	0.295399	0.293007	0.0261833	0.590353	UP	AT4G25810	XTR6	xyloglucan endotransglycosylase-related protein (XTR6)
BnaC01G0233100ZS	0.569945	0.569712	0.289519	0.368994	0.026216	0.791315	UP	AT4G16780	HB-2	Encodes a homeodomain-leucine zipper protein that is rapidly and strongly induced by changes in the ratio of red to far-red light. It is also involved in cell expansion and cell proliferation and in the response to auxin.
BnaC03G0172100ZS	1.05739	1.19139	0.535598	0.649382	0.0262367	0.924279	UP	AT2G30500	NET4B	Kinase interacting (KIP1-like) family protein
BnaC05G0165400ZS	0.48593	0.429641	0.283398	0.289536	0.0262389	0.676301	UP	AT1G19530	RGAT1	--
BnaC04G0441500ZS	1.08334	1.03726	0.606781	0.728192	0.0262525	0.667662	UP	AT2G22770	NAI1	regulates the development of ER bodies. also involves in response to the endophytic fungus Piriformospora indica.
BnaA04G0120500ZS	0.65469	0.726261	0.441898	0.471201	0.0262535	0.59682	UP	AT5G40780	LHT1	Encodes LHT1 (lysine histidine transporter), a high-affinity transporter for cellular amino acid uptake in both root epidermis and leaf mesophyll.
BnaA06G0113600ZS	1.17906	1.30549	0.70251	0.803482	0.026267	0.722269	UP	AT1G16740	--	Ribosomal protein L20
BnaA06G0340800ZS	1.24772	1.09379	0.710698	0.674083	0.0262793	0.75778	UP	AT5G66900	NRG1A	Disease resistance protein (CC-NBS-LRR class) family
BnaA07G0105700ZS	0.740173	0.635964	0.351965	0.376693	0.0262881	0.917311	UP	AT1G25390	LRK10L4	Protein kinase superfamily protein
BnaC03G0654000ZS	0.613613	0.512959	0.191981	0.245488	0.0262902	1.36469	UP	AT1G28960	NUDX15	Encodes a ppGpp pyrophosphohydrolase.
BnaA09G0064300ZS	0.390603	0.472054	0.158068	0.100001	0.026299	1.74103	UP	AT5G25440	SZE1	Protein kinase superfamily protein
BnaA09G0087700ZS	0.65426	0.646328	0.456877	0.380659	0.0263107	0.634942	UP	AT5G64300	RIBA1	encodes GTP cyclohydrolase II that can functionally complement E. coli mutant deficient in this gene. It also has 3,4-dihydroxy-2-butanone-4-phosphate synthase activity which makes it a bifunctional enzyme involved in the formation of the pyrimidine and of the carbohydrate from GTP and ribulose-5-phosphate, respectively
BnaA08G0287000ZS	0.644667	0.667464	0.387161	0.460608	0.0263478	0.630169	UP	AT1G10760	SOP1	Encodes an &#945;-glucan, water dikinase required for starch degradation. Involved in cold-induced freezing tolerance. Mutations that eliminate the GWD protein or affect the dikinase domain of the enzyme dramatically reduce both the amount of phosphate in the amylopectin and the rate of starch degradation. Mature leaves of these mutants accumulate amounts of starch up to seven times greater than …
BnaC02G0537700ZS	1.39016	1.37611	0.867934	0.663773	0.026394	0.8528	UP	AT5G63660	PDF2.5	Predicted to encode a PR (pathogenesis-related) protein. Belongs to the plant defensin (PDF) family with the following members: At1g75830/PDF1.1, At5g44420/PDF1.2a, At2g26020/PDF1.2b, At5g44430/PDF1.2c, At2g26010/PDF1.3, At1g19610/PDF1.4, At1g55010/PDF1.5, At2g02120/PDF2.1, At2g02100/PDF2.2, At2g02130/PDF2.3, At1g61070/PDF2.4, At5g63660/PDF2.5, At2g02140/PDF2.6, At5g38330/PDF3.1 and At4g30070/PDF…
BnaC01G0234800ZS	0.29534	0.319613	0.124223	0.171296	0.0264065	1.05722	UP	AT4G16680	--	P-loop containing nucleoside triphosphate hydrolases superfamily protein
BnaA08G0043100ZS	0.878448	0.898371	0.381295	0.524377	0.0264147	0.972236	UP	AT1G47750	PEX11A	member of the peroxin11 (PEX11) gene family, integral to peroxisome membrane, controls peroxisome proliferation.
BnaC03G0556100ZS	0.856052	0.973689	0.562811	0.528582	0.0264463	0.745468	UP	AT5G62260	AHL6	AT hook motif DNA-binding family protein
BnaC04G0017100ZS	0.456164	0.389155	0.216531	0.223124	0.0264606	0.943124	UP	AT2G46270	GBF3	encodes a bZIP G-box binding protein whose expression is induced by ABA. It has been shown to bind to Adh that contains the G-box and is induced by cold and water deprivation. GBF3 has been shown to be expressed mostly in the root and dark-grown leaves. GBF3 can act as homodimers and as heterodimers with GFB1, GBF2 and GBF4. In addition, GBF3隆炉s DNA binding activity is enhanced by GIP1, GPRI1 and…
BnaC09G0620500ZS	0.570991	0.544525	0.146652	0.261122	0.0264691	1.45187	UP	AT5G02010	ROPGEF7	Encodes a member of KPP-like gene family, homolog of KPP (kinase partner protein) gene in tomato. Also a member of the RopGEF (guanine nucleotide exchange factor) family, containing the novel PRONE domain (plant-specific Rop nucleotide exchanger), which is exclusively active towards members of the Rop subfamily.
BnaA06G0399300ZS	1.01113	1.18045	0.288877	0.45883	0.026514	1.55143	UP	AT2G03240	--	EXS (ERD1/XPR1/SYG1) family protein
BnaC05G0553500ZS	0.951652	0.769438	0.150842	0.267651	0.0265159	2.04005	UP
BnaA06G0414300ZS	0.799387	0.93615	0.376726	0.254112	0.02655	1.46004	UP	AT5G47710	--	Calcium-dependent lipid-binding (CaLB domain) family protein
BnaA10G0286400ZS	0.928441	1.00247	0.27375	0.45883	0.0265724	1.39822	UP	AT5G04110	GYRB3	DNA GYRASE B3
BnaA02G0270400ZS	0.754358	0.676447	0.484144	0.466477	0.0265806	0.589886	UP	AT4G10430	--	TMPIT-like protein
BnaA09G0047200ZS	0.679751	0.760983	0.452526	0.477535	0.0266005	0.631407	UP	AT5G48150	PAT1	Member of GRAS gene family. Semi-dominant mutant has a reduced response to far-red light and appears to act early in the phytochrome A signaling pathway.
BnaC05G0140700ZS	0.755574	0.848913	0.525792	0.51151	0.0266143	0.629276	UP	AT1G78870	UBC35	UBC35/UBC13A encodes a protein that may play a role in DNA damage responses and error-free post-replicative DNA repair by participating in lysine-63-based polyubiquitination reactions. UBC35/UBC13A can form diubiquitin and triubiquitin chains in combination with MMZ1,2,3,4/(UEV1A,B,C,D) in vitro. It can also functionally complement an mms2 ubc13 mutation in budding yeast by increasing the double …
BnaC03G0370800ZS	0.666156	0.553995	0.248446	0.178434	0.0266739	1.51516	UP	AT3G07510	--	--
BnaC04G0066400ZS	0.578219	0.571583	0.319968	0.392554	0.0266779	0.690378	UP	AT2G40120	DYRKP-3	Protein kinase superfamily protein
BnaA02G0218100ZS	1.53829	1.51863	0.931182	1.1009	0.0266864	0.589116	UP	AT1G75810	--	--
BnaA03G0247300ZS	0.979421	0.963029	0.572914	0.685735	0.026689	0.626001	UP	AT4G08230	--	glycine-rich protein
BnaA04G0277600ZS	0.922814	0.864887	0.301684	0.462305	0.0267102	1.22648	UP	AT2G43640	--	Signal recognition particle, SRP9/SRP14 subunit
BnaA07G0214400ZS	0.775889	0.681234	0.377985	0.430641	0.0267815	0.849578	UP	AT3G61110	RS27A	Arabidopsis ribosomal protein
BnaC03G0261300ZS	0.897929	0.776867	0.479952	0.453935	0.0268132	0.842666	UP	AT2G45790	PMM	encodes a phosphomannomutase, involved in ascorbate biosynthesis
BnaC08G0107100ZS	0.478896	0.4289	0.243134	0.282801	0.0268142	0.787485	UP	AT1G32230	RIMB1	Encodes a protein belonging to the (ADP-ribosyl)transferase domain-containing subfamily of WWE protein-protein interaction domain protein family. Superoxide radicals are necessary and sufficient to propagate cell death or lesion formation in rcd1 mutants. Without stress treatment, RCD1 is localized in the nucleus. Under high salt or oxidative stress, RCD1 is found not only in the nucleus but also…
BnaA07G0351800ZS	0.69211	0.812527	0.358733	0.394432	0.0268154	0.998376	UP	AT1G75350	emb2184	Ribosomal protein L31
BnaC07G0101700ZS	0.78663	0.861886	0.491936	0.558004	0.0268664	0.650862	UP	AT3G24550	PERK1	Encodes a member of the proline-rich extensin-like receptor kinase (PERK) family. This family consists of 15 predicted receptor kinases (PMID: 15653807).
BnaA03G0075500ZS	0.970311	1.18967	0.432743	0.407848	0.0268741	1.36154	UP	AT5G17840	--	DnaJ/Hsp40 cysteine-rich domain superfamily protein
BnaA06G0113800ZS	1.18956	1.13317	0.734535	0.574469	0.0269003	0.827356	UP	AT1G16790	--	ribosomal protein-related
BnaC04G0181300ZS	1.0145	1.01566	0.54787	0.681959	0.0269435	0.723133	UP	AT2G29900	PS2	Presenilin-2
BnaA01G0020700ZS	0.75785	0.830076	0.393942	0.487774	0.0269808	0.848757	UP	AT4G36730	GBF1	member of a gene family encoding basic leucine zipper proteins (GBFs) which bind the G-box
BnaA08G0135500ZS	0.737405	0.827509	0.488058	0.426689	0.0269823	0.774639	UP	AT4G34390	XLG2	extra-large GTP-binding protein 2
BnaC03G0753900ZS	0.705615	0.724177	0.485469	0.395299	0.0269836	0.698971	UP	AT4G33565	ATL83	RING/U-box superfamily protein
BnaA02G0027800ZS	0.808483	0.786075	0.532239	0.428241	0.0270145	0.731328	UP	AT5G08080	SYP132	member of SYP13 Gene Family
BnaA10G0055600ZS	1.03297	1.06553	0.555419	0.694127	0.027029	0.747955	UP	AT1G07610	MT1C	one of the five metallothioneins (MTs) genes identified in Arabidopsis. MTs are cysteine-rich proteins required for heavy metal tolerance.
BnaA04G0064400ZS	0.641553	0.680569	0.399159	0.302593	0.0270466	0.913824	UP	AT3G52430	PAD4	Encodes a lipase-like gene that is important for salicylic acid signaling and function in resistance (R) gene-mediated and basal plant disease resistance. PAD4 can interact directly with EDS1, another disease resistance signaling protein. Expressed at elevated level in response to green peach aphid (GPA) feeding, and modulates the GPA feeding-induced leaf senescence through a mechanism that doesn…
BnaC03G0615000ZS	0.73204	0.923326	0.263974	0.21412	0.0270549	1.79178	UP	AT3G46980	PHT4;3	Encodes an inorganic phosphate transporter (PHT4;3).
BnaC03G0188600ZS	0.674807	0.771961	0.3942	0.318287	0.0270556	1.0219	UP	AT2G33585	--	--
BnaC07G0064800ZS	0.221617	0.230831	0.162445	0.138782	0.0270597	0.586904	UP	AT2G16405	--	Transducin/WD40 repeat-like superfamily protein
BnaA05G0349700ZS	0.934349	0.83622	0.555255	0.480398	0.0270639	0.773672	UP	AT3G20780	TOP6B	Encodes putative eukaryotic homolog of archaebacterial topoisomerase VI subunit B, TOP6B. Is essential for endoreduplication and is involved in cell expansion and cell proliferation.
BnaC03G0538800ZS	0.810666	0.735531	0.225027	0.366645	0.0270681	1.38586	UP	AT5G63770	DGK2	a member of the diacylglycerol kinase gene family. Encodes a functional diacylglycerol kinase. Involved in root elongation and plant development. Gene expression is induced by wounding or cold.
BnaC04G0440000ZS	0.789668	0.923326	0.443476	0.374276	0.0271201	1.06679	UP	AT2G22640	HSPC300	Component of the WAVE protein complex which act as activators of ARP2/3 complex involved in actin nucleation. Required for trichome morphogenesis. Required for accumulation of SCAR1 protein in vivo. Selectively stabilizes SCAR2.
BnaC05G0160700ZS	0.737644	0.651458	0.393617	0.432702	0.0271304	0.749381	UP	AT1G19140	COQ9	--
BnaA10G0261200ZS	0.702924	0.764393	0.40735	0.482525	0.0271341	0.721506	UP	AT5G07290	ML4	AML4 A member of mei2-like gene family, predominantly plant-based family of genes encoding RNA binding proteins with characteristic presence of a highly conserved RNA binding motif first described in the mei2 gene of the fission yeast S. pombe. In silico analyses reveal nine mei2 -like genes in A. thaliana. They were grouped into four distinct clades, based on overall sequence similarity and subf…
BnaA02G0088000ZS	0.548743	0.611007	0.331482	0.37539	0.0271543	0.714292	UP	AT5G21090	--	Leucine-rich repeat (LRR) family protein
BnaA08G0157900ZS	0.527679	0.483064	0.228301	0.296763	0.0271603	0.944849	UP	AT1G01670	PUB56	RING/U-box superfamily protein
BnaC05G0361700ZS	0.635285	0.736022	0.385631	0.386901	0.027161	0.827886	UP	AT3G22160	JAV1	VQ motif-containing protein
BnaA01G0081100ZS	0.762485	0.815834	0.428479	0.520086	0.0271861	0.734571	UP	AT4G29010	AIM1	Functions in beta-oxidation of fatty acids, similar to CuMFP with L-3-hydroxyacyl-CoA hydrolyase , L-3-hydroxyacyl-dehydrogenase, D-3-hydroxyacyl-CoA epimerase, and 3, 2-enoyl-CoA isomerase activities
BnaC04G0454500ZS	0.79733	0.701728	0.429516	0.464601	0.0271885	0.74552	UP	AT2G24060	SVR9	Translation initiation factor 3 protein
BnaC02G0279600ZS	0.763826	0.772783	0.514748	0.412526	0.0272078	0.728683	UP	AT1G73930	--	--
BnaA03G0068400ZS	0.608065	0.539168	0.371441	0.364932	0.0272177	0.63965	UP	AT5G16330	--	NC domain-containing protein-related
BnaC05G0570400ZS	0.524569	0.521166	0.314061	0.374191	0.0272294	0.603509	UP	AT3G02290	--	RING/U-box superfamily protein
BnaC01G0342600ZS	1.32404	1.28007	0.687931	0.860305	0.027232	0.75016	UP	AT1G61520	LHCA3	PSI type III chlorophyll a/b-binding protein (Lhca3*1)
BnaA10G0179100ZS	0.419752	0.407512	0.230902	0.282379	0.0272439	0.688599	UP	AT5G19590	--	Protein of unknown function, DUF538
BnaC04G0361400ZS	0.422462	0.380872	0.226925	0.260284	0.0272856	0.72146	UP	AT4G13550	HIL1	triglyceride lipases;triglyceride lipases
BnaA05G0136500ZS	0.520715	0.579763	0.344313	0.293141	0.0273157	0.787736	UP	AT1G07175	--	--
BnaC01G0041900ZS	0.7418	0.783016	0.396451	0.495154	0.0273682	0.77416	UP	AT4G34620	SSR16	Encodes ribosomal protein S16, has embryo-defective lethal mutant phenotype
BnaA09G0678300ZS	1.05183	0.797418	0.18101	0.120874	0.0273758	2.61486	UP	AT1G50390	--	pfkB-like carbohydrate kinase family protein
BnaA10G0021300ZS	0.612449	0.563863	0.263974	0.346371	0.0273968	0.946574	UP	AT1G03760	URI	Prefoldin chaperone subunit family protein
BnaA03G0405100ZS	0.804372	0.83006	0.43478	0.542841	0.0274264	0.741444	UP	AT5G60950	COBL5	COBRA-like protein 5 precursor
BnaC04G0498800ZS	0.702854	0.722603	0.356922	0.45825	0.0274422	0.806247	UP	AT2G30250	WRKY25	member of WRKY Transcription Factor; Group I. Located in nucleus. Involved in response to various abiotic stresses - especially salt stress.
BnaC09G0161800ZS	1.06706	0.940113	0.568439	0.622682	0.0274443	0.752843	UP	AT1G63690	SPPL2	SIGNAL PEPTIDE PEPTIDASE-LIKE 2
BnaA07G0290000ZS	0.775869	0.741863	0.445822	0.323824	0.0274853	0.97965	UP	AT5G46270	--	Disease resistance protein (TIR-NBS-LRR class) family
BnaA03G0499300ZS	0.612276	0.693849	0.362199	0.40367	0.0275119	0.770124	UP	AT4G27657	--	--
BnaA09G0457100ZS	0.422462	0.423379	0.204206	0.267651	0.0275994	0.842038	UP	AT1G22940	THIE	Encodes a bifunctional enzyme required for thiamine (vitamin B1) biosynthesis. TH1 can phosphorylate HMP-P to produce HMP-PP, the pyrimidine heterocyclic subunit of thiamine. TH1 also catalyzes the condensation of HMP-PP and HET to form thiamine monophosphate (TMP). TH1 also appears capable of phosphorylating HMP based on E.coli mutant complementation assays. th1 mutants are thiamine auxotrophs t…
BnaA09G0193600ZS	0.405892	0.450264	0.219275	0.264305	0.0276045	0.824118	UP	AT1G03930	CKL9BETA	Phosphorylates serine, threonine, and tyrosine
BnaC03G0046000ZS	0.490789	0.61555	0.173039	0.190912	0.0276328	1.60398	UP	AT5G10100	TPPI	Haloacid dehalogenase-like hydrolase (HAD) superfamily protein
BnaA06G0353800ZS	0.700272	0.618094	0.332096	0.234392	0.0276419	1.21863	UP	AT5G28650	WRKY74	member of WRKY Transcription Factor; Group II-d
BnaC05G0051400ZS	0.714815	0.651063	0.457758	0.399306	0.0277009	0.672355	UP	AT1G07160	--	Protein phosphatase 2C family protein
BnaC03G0167400ZS	0.729794	0.644299	0.427704	0.439221	0.027735	0.6645	UP	AT2G29990	NDA2	alternative NAD(P)H dehydrogenase 2
BnaA04G0272300ZS	0.919717	0.815604	0.494762	0.549388	0.0277381	0.732874	UP	AT2G42810	PP5	Encodes a phytochrome-specific type 5 serine/threonine protein phosphatase. It dephosphorylates active Pfr-phytochromes. Controls light signal flux by enhancing phytochrome stability and affinity for a signal transducer. The gene is alternately spliced. This variant is an integral membrane protein localized to the ER and nuclear envelope. Belongs to one of the 36 carboxylate clamp (CC)-tetratrico…
BnaA07G0120300ZS	0.63884	0.714363	0.419684	0.45166	0.0277675	0.635062	UP	AT1G22840	CYTC-1	Encodes cytochrome c. Contains two site II (TGGGCC/T) elements, which interact with a TCP-domain transcription factor, and a downstream internal telomeric repeat, and are required for expression of the Cytc-1 gene. Promoter directs preferential expression in root and shoot meristems and in anthers.
BnaC04G0298200ZS	0.793043	0.723688	0.410625	0.489418	0.0277715	0.752898	UP	AT3G57560	NAGK	encodes a N-acetylglutamate kinase, involved in arginine biosynthesis
BnaA03G0113200ZS	0.445373	0.531957	0.2188	0.237777	0.0277717	1.09799	UP	AT5G57100	--	Nucleotide/sugar transporter family protein
BnaC08G0190800ZS	0.863126	0.845572	0.533924	0.40388	0.0277741	0.865539	UP	AT1G09160	--	Protein phosphatase 2C family protein
BnaA08G0300600ZS	0.656311	0.80791	0.253415	0.291982	0.0277821	1.42476	UP	AT1G08180	SMR2	--
BnaA06G0291000ZS	0.834164	0.845913	0.573657	0.465098	0.0277867	0.693672	UP	AT5G63990	--	Inositol monophosphatase family protein
BnaC02G0355400ZS	1.0752	0.957147	0.614824	0.664778	0.0277959	0.66745	UP	AT4G12390	PME1	pectin methylesterase inhibitor 1
BnaC04G0368800ZS	0.623496	0.687024	0.416116	0.348163	0.0277979	0.777968	UP	AT5G35560	--	DENN (AEX-3) domain-containing protein
BnaA02G0327600ZS	1.2603	1.12118	0.743037	0.785108	0.0278037	0.640075	UP	AT2G03450	PAP9	purple acid phosphatase 9
BnaC01G0373100ZS	0.908473	0.824278	0.487336	0.566614	0.0278194	0.717258	UP	AT3G22260	--	Cysteine proteinases superfamily protein
BnaC09G0620900ZS	0.620642	0.593567	0.313914	0.197216	0.0278269	1.24825	UP	AT5G01075	TWS1	Glycosyl hydrolase family 35 protein
BnaC07G0005500ZS	0.303425	0.273096	0.189824	0.168237	0.0278307	0.687168	UP	AT2G07200	--	Cysteine proteinases superfamily protein
BnaC04G0132700ZS	0.452243	0.49406	0.298102	0.243125	0.0278677	0.806069	UP	AT2G33740	CUTA	encodes a copper binding protein that forms tetramers in vitro. Gene is expressed in all tissues examined and protein is localized to the chloroplast.
BnaA06G0122600ZS	0.585632	0.501234	0.263974	0.199182	0.0278899	1.23061	UP	AT1G17870	EGY3	S2P-like putative metalloprotease, also contain transmembrane helices near their C-termini and many of them, five of seven, contain a conserved zinc-binding motif HEXXH. Homolog of EGY1. Each of the EGY1 and EGY-like proteins share two additional highly conserved motifs, the previously reported NPDG motif (aa 442锟?54 in EGY1, Rudner et al., 1999) and a newly defined GNLR motif (aa 171锟?79 in EGY1…
BnaC02G0370300ZS	0.484292	0.526729	0.274907	0.192412	0.0279009	1.11333	UP	AT2G07180	PBL17	Protein kinase superfamily protein
BnaA05G0464800ZS	1.0876	0.87203	0.351965	0.345356	0.0279726	1.49069	UP	AT3G06550	RWA2	Encodes a homolog of the protein Cas1p known to be involved in polysaccharide O-acetylation in Cryptococcus neoformans. Mutants show reduced cell wall polysaccharide acetylation and increased resistance to Botrytis cinerea. The protein is expressed in the Golgi and is involved in the acetylation of xylan during secondary wall biosynthesis.
Bnascaffold0328G0000100ZS	0.801391	0.692494	0.369563	0.420594	0.0279835	0.918859	UP	AT4G30700	MEF29	Encodes a pentatricopeptide repeat protein involved in mitochondrial RNA editing.
BnaA03G0108600ZS	0.768884	0.625244	0.275451	0.278357	0.0280083	1.33191	UP	AT5G58030	TRAPPC5	Transport protein particle (TRAPP) component
BnaA02G0360800ZS	1.02808	1.07921	0.591812	0.718196	0.028018	0.685815	UP	AT5G48380	BIR1	Encodes a BAK1-interacting receptor-like kinase named BIR1. Negatively regulates multiple plant resistance signaling pathways, one of which is the SOBIR1(AT2G31880)-dependent pathway.
BnaA05G0063200ZS	0.772517	0.665653	0.385259	0.410642	0.0280222	0.853575	UP	AT2G39840	TOPP4	Encodes the catalytic subunit of a Type 1 phosphoprotein Ser/Thr phosphatase, expressed in roots, shoots and flowers.
BnaC09G0478200ZS	0.548151	0.602169	0.360345	0.399591	0.028029	0.598086	UP	AT5G18610	PBL27	Protein kinase superfamily protein
BnaC05G0498800ZS	0.434087	0.452241	0.19798	0.267651	0.028061	0.928654	UP	AT3G10250	--	Plant protein 1589 of unknown function
BnaC04G0187000ZS	0.736397	0.787687	0.44988	0.528025	0.0280623	0.640176	UP	AT2G29330	TRI	tropinone reductase
BnaC09G0237400ZS	1.24003	1.43275	0.664822	0.490693	0.0280759	1.2098	UP	AT5G46080	--	Protein kinase superfamily protein
BnaC04G0211300ZS	0.810666	0.747669	0.433773	0.516628	0.0280841	0.713398	UP	AT2G26830	emb1187	Protein kinase superfamily protein
BnaA10G0180200ZS	0.720169	0.579763	0.241976	0.197216	0.0280841	1.56551	UP	AT5G19460	NUDT20	nudix hydrolase homolog 20
BnaA06G0425600ZS	0.914332	0.83539	0.606161	0.539266	0.0280903	0.611239	UP	AT5G46210	CUL4	Arabidopsis CULLIN4 (CUL4) forms an E3 ubiquitin ligase with the CDD complex and a common catalytic subunit RBX1 in mediating light control of development. This CUL4-based E3 ligase is essential for the repression of photomorphogenesis. The partial loss of CUL4 function resulted in a constitutive photomorphogenic phenotype with respect to morphogenesis and light-regulated gene expression. CUL4 ex…
BnaC04G0294600ZS	1.01405	1.09547	0.582295	0.698549	0.0281028	0.719825	UP	AT3G57990	OEP40	--
BnaC03G0804800ZS	0.525312	0.569268	0.234643	0.316657	0.0281047	0.989468	UP	AT1G54150	SPL2	E3 Ubiquitin ligase family protein
BnaA04G0245500ZS	1.14802	1.01023	0.626497	0.676479	0.0281392	0.728052	UP	AT2G38170	RCI4	Encodes a high affinity vacuolar calcium antiporter. The residue His 338 is critical to Ca2+ transport activity. Disruption of CAX1 reduces manganese and zinc of shoot tissue and results in a decrease in the activity of vacuolar V-type proton ATPase.
BnaC03G0375700ZS	0.899506	0.849949	0.561174	0.443535	0.0281446	0.800127	UP	AT4G08520	--	SNARE-like superfamily protein
BnaC06G0267800ZS	0.722175	0.88975	0.321663	0.273188	0.0281804	1.43818	UP	AT1G76200	--	--
BnaC08G0355500ZS	1.09806	1.24171	0.75421	0.71088	0.0281891	0.67538	UP	AT3G55600	USE12	Membrane fusion protein Use1
[truncated: 42,284 more rows]

## Sheet: TE_WCS417_6h-TE_Control
Table S6. Results of differential translation efficiency gene analysis.
Gene	TE_WCS417_6h_1	TE_WCS417_6h_2	TE_Control_1	TE_Control_2	pvalue	log2FC	DEGs	Ath	Symbol	Description
BnaC01G0216900ZS	0.566808	0.568384	0.319224	0.318903	1.04767e-05	0.831022	UP	AT4G27600	NARA5	Encodes a phosphofructokinase B-type carbohydrate kinase family protein, NARA5. Regulates photosynthetic gene expression.
BnaA02G0200900ZS	0.467214	0.466411	0.273884	0.271899	3.04747e-05	0.774515	UP	AT1G72540	PBL33	Protein kinase superfamily protein
BnaC01G0162000ZS	0.581923	0.578597	0.372668	0.37786	0.000226046	0.628793	UP	AT4G23180	RLK4	Encodes a receptor-like protein kinase. Naming convention from Chen et al 2003 (PMID 14756307)
BnaC07G0216700ZS	0.279159	0.281113	0.132415	0.136872	0.000279614	1.05698	UP	AT5G66210	CPK28	member of Calcium Dependent Protein Kinase
BnaC06G0397500ZS	0.633385	0.643625	0.21466	0.225643	0.000321916	1.5362	UP	AT1G73340	CYP720A1	Cytochrome P450 superfamily protein
BnaC09G0356200ZS	0.330325	0.335684	0.188553	0.187355	0.000358041	0.825162	UP	AT5G53450	ORG1	OBP3-responsive gene 1
Bnascaffold0025G0033100ZS	0.617629	0.610074	0.394443	0.389839	0.000397876	0.646518	UP	AT3G09720	RH57	P-loop containing nucleoside triphosphate hydrolases superfamily protein
BnaC05G0416300ZS	0.417667	0.407093	0.144927	0.140869	0.000441322	1.52899	UP	AT3G18380	SHH2	sequence-specific DNA binding transcription factors;sequence-specific DNA binding
BnaC05G0490400ZS	0.458149	0.44715	0.193151	0.19201	0.000451645	1.23293	UP	AT3G11170	FADD	Chloroplastic enzyme responsible for the synthesis of 16:3 and 18:3 fatty acids from galactolipids, sulpholipids and phosphatidylglycerol. Uses ferredoxin as electron donor. Gene expression is induced by wounding in shoot and root. The wound-response in shoot is independent of jasmonic acid mediated pathway whereas the root response is mediated by jasmonic acid.
BnaC06G0047100ZS	1.13759	1.14367	0.351965	0.385417	0.000484631	1.62935	UP	AT3G19950	BTL08	RING/U-box superfamily protein
BnaA01G0224000ZS	0.599639	0.602068	0.353837	0.364271	0.000490415	0.742813	UP	AT3G48100	RR5	Encodes a transcription repressor that mediates a negative feedback loop in cytokinin signalling. ARR5 expression is upregulated by Class I KNOX genes. Arr5 protein is stabilized by cytokinin in a two-component phosphorelay.
BnaC01G0046300ZS	0.357727	0.352835	0.178348	0.184905	0.000554338	0.967982	UP	AT4G34140	--	D111/G-patch domain-containing protein
BnaC06G0271200ZS	0.420633	0.416098	0.257974	0.251562	0.000575617	0.715578	UP	AT1G75510	--	Transcription initiation factor IIF, beta subunit
BnaC03G0059500ZS	0.478638	0.47023	0.270112	0.275298	0.000598851	0.798866	UP	AT5G13080	WRKY75	WRKY75 is one of several transcription factors induced during Pi deprivation. It is nuclear localized and regulated differentially during Pi starvation. RNAi mediated suppression of WRKY75 made the plants more susceptible to Pi stress as indicated by the higher accumulation of anthocyanin during Pi starvation.
BnaA07G0099200ZS	1.00286	1.01581	0.301684	0.267651	0.00063063	1.82606	UP	AT1G27420	--	Galactose oxidase/kelch repeat superfamily protein
BnaC05G0377000ZS	0.531642	0.528474	0.195926	0.178022	0.000701405	1.50332	UP	AT3G21070	NADK1	Encodes a protein with NAD(H) kinase activity.
BnaA03G0511800ZS	0.512853	0.499756	0.252154	0.248533	0.000703837	1.0161	UP	AT4G29680	--	Alkaline-phosphatase-like family protein
BnaC04G0023700ZS	0.595778	0.588568	0.194507	0.21412	0.000724906	1.53523	UP	AT2G41130	STC8	basic helix-loop-helix (bHLH) DNA-binding superfamily protein
BnaA09G0449100ZS	0.554212	0.543942	0.340034	0.334563	0.000753929	0.702982	UP	AT1G23890	--	NHL domain-containing protein
BnaA03G0040800ZS	0.426566	0.431795	0.242949	0.233586	0.000787949	0.849001	UP	AT5G10490	MSL2	A member of MscS-like gene family, structurally very similar to MSL3, comprising of an N-terminal chloroplast transit peptide, five trans-membrane helices and a C-terminal cytoplasmic domain. Mutant plants showed abnormalities in the size and shape of plastids. MSL2-GFP was localized to discrete foci on the plastid envelope and co-localize with the plastid division protein AtMinE.
BnaA08G0239900ZS	0.76534	0.746257	0.284279	0.301965	0.000789639	1.3665	UP	AT3G08505	AtC3H35	zinc finger (CCCH-type/C3HC4-type RING finger) family protein
BnaA08G0148600ZS	0.476808	0.487614	0.305424	0.307932	0.00099697	0.652939	UP	AT4G31750	WIN2	Encodes HopW1-1-Interacting protein 2 (WIN2). Interacts with the P. syringae effector HopW1-1. WIN2 has protein phosphatase activity. Modulates plant defenses against bacteria. Three WIN proteins are identified so far (WIN1: AT1G80600; WIN2: AT4G31750; WIN3: AT5G13320).
BnaC09G0006300ZS	1.18232	1.15852	0.664822	0.642361	0.00100055	0.840567	UP	AT4G01950	GPAT3	putative sn-glycerol-3-phosphate 2-O-acyltransferase
BnaC01G0474200ZS	1.29316	1.27438	0.633536	0.594779	0.00103266	1.06371	UP
BnaA02G0375000ZS	0.955538	0.96242	0.296755	0.252944	0.00104886	1.80286	UP	AT5G26920	CBP60G	Encodes a calmodulin-binding protein CBP60g (calmodulin binding protein 60-like.g). The calmodulin-binding domain is located near the N-terminus; calmodulin binding is dependent on Ca(2+). Inducible by both bacterial pathogen and MAMP (microbe-associated molecular pattern) treatments. Bacterial growth is enhanced in cbp60g mutants. cbp60g mutants also show defects in salicylic acid (SA) accumulat…
BnaA02G0020400ZS	0.61816	0.622893	0.39596	0.381062	0.00113296	0.675537	UP	AT5G05600	JOX2	2-oxoglutarate (2OG) and Fe(II)-dependent oxygenase superfamily protein
BnaC08G0159000ZS	0.0604595	0.058999	0.0301684	0.0314883	0.00115789	0.954179	UP	AT2G24520	HA5	H(+)-ATPase 5
BnaA01G0394800ZS	0.436863	0.42576	0.260818	0.255946	0.00122682	0.739225	UP	AT3G05890	RCI2B	Low temperature and salt responsive protein family
BnaC05G0135800ZS	0.677968	0.656752	0.329967	0.317651	0.00127232	1.04332	UP	AT1G16300	GAPCP-2	Encodes one of the chloroplast/plastid localized GAPDH isoforms (GAPCp1/At1g79530 and GAPCp2/At1g16300). gapcp double mutants display a drastic phenotype of arrested root development, dwarfism and sterility. GAPCps are important for the synthesis of serine in roots.
BnaA01G0284100ZS	0.472928	0.477892	0.191981	0.17155	0.00127915	1.38709	UP	AT1G61890	--	MATE efflux family protein
BnaC09G0331100ZS	0.259418	0.249107	0.110501	0.10706	0.00139286	1.2249	UP	AT4G24520	ATR1	Encodes a cyp450 reductase likely to be involved in phenylpropanoid metabolism.
BnaA02G0243700ZS	0.74532	0.735218	0.365502	0.391182	0.00145018	0.968359	UP	AT1G80420	XRCC1	Encodes a component of plant break excision repair and functions at several stages during active DNA demethylation in Arabidopsis.
BnaA06G0009800ZS	0.475039	0.482719	0.211179	0.229415	0.00146068	1.12021	UP
BnaC04G0442700ZS	0.753728	0.778786	0.263974	0.291982	0.00147773	1.46286	UP	AT2G22870	EngB-1	P-loop containing nucleoside triphosphate hydrolases superfamily protein
BnaA08G0217800ZS	0.737403	0.759151	0.43515	0.423545	0.00149006	0.801426	UP	AT1G27770	PEA1	Encodes a chloroplast envelope Ca2+-ATPase with an N-terminal autoinhibitor.
BnaA02G0073300ZS	0.35268	0.353994	0.158384	0.142747	0.0014939	1.23065	UP	AT5G18230	NOT3	transcription regulator NOT2/NOT3/NOT5 family protein
BnaA02G0123500ZS	0.585002	0.56639	0.222293	0.200738	0.00152529	1.44454	UP	AT5G56320	EXPA14	member of Alpha-Expansin Gene Family. Naming convention from the Expansin Working Group (Kende et al, 2004. Plant Mol Bio)
BnaA03G0101500ZS	0.911931	0.888711	0.591765	0.582969	0.00157008	0.616177	UP	AT5G59720	HSP18.2	encodes a low molecular weight heat shock protein that contains the heat shock element in the promoter region. Expression is induced in response to heat shock.
BnaA10G0213600ZS	0.85789	0.827844	0.476188	0.478564	0.00169578	0.820179	UP	AT5G14700	--	NAD(P)-binding Rossmann-fold superfamily protein
BnaC07G0524600ZS	0.841581	0.858623	0.334796	0.291982	0.00183776	1.43968	UP	AT4G35120	--	Galactose oxidase/kelch repeat superfamily protein
BnaC03G0728700ZS	0.589289	0.605082	0.304585	0.283395	0.00189408	1.02241	UP	AT4G22140	EBS	PHD finger family protein / bromo-adjacent homology (BAH) domain-containing protein
BnaC03G0495000ZS	0.173708	0.177737	0.0846497	0.0911994	0.00191228	0.998963	UP	--	--	--
BnaC04G0148700ZS	1.10842	1.06198	0.372668	0.41177	0.00191332	1.46823	UP	AT2G32650	--	RmlC-like cupins superfamily protein
BnaC07G0310900ZS	0.404113	0.416182	0.258586	0.252418	0.00191483	0.682806	UP	AT3G27925	DEGP1	Encodes a DegP protease; nuclear gene encoding chloroplast-targeted protease that can degrade two lumenal proteins, plastocyanin and OE33, suggesting a role as a general-purpose protease in the thylakoid lumen. Involved in the degradation of D1 protein of PS II, hence participating in the repair of PS II damages caused by photoinhibition.
BnaA05G0464800ZS	0.59116	0.571836	0.351965	0.345356	0.00191778	0.737952	UP	AT3G06550	RWA2	Encodes a homolog of the protein Cas1p known to be involved in polysaccharide O-acetylation in Cryptococcus neoformans. Mutants show reduced cell wall polysaccharide acetylation and increased resistance to Botrytis cinerea. The protein is expressed in the Golgi and is involved in the acetylation of xylan during secondary wall biosynthesis.
BnaC03G0210000ZS	0.464823	0.490145	0.16672	0.152943	0.00205261	1.5789	UP	AT2G37430	ZAT11	C2H2 and C2HC zinc fingers superfamily protein
BnaC03G0167400ZS	0.661479	0.680041	0.427704	0.439221	0.00211188	0.629888	UP	AT2G29990	NDA2	alternative NAD(P)H dehydrogenase 2
BnaC05G0498800ZS	1.01606	0.997619	0.19798	0.267651	0.00216031	2.11257	UP	AT3G10250	--	Plant protein 1589 of unknown function
BnaA10G0300000ZS	0.369475	0.386175	0.200064	0.199182	0.00219454	0.92044	UP	AT5G01100	FRB1	O-fucosyltransferase family protein
BnaA09G0046900ZS	0.606994	0.574044	0.216594	0.202546	0.00220298	1.49455	UP	AT5G47920	--	--
BnaC05G0344900ZS	0.862108	0.876135	0.301684	0.351541	0.00227081	1.41198	UP	AT1G32127	--	--
Bnascaffold0027G0022000ZS	0.806127	0.807106	0.344782	0.387239	0.00231455	1.14	UP	AT5G63220	GET4	--
BnaC02G0403000ZS	0.50143	0.473413	0.205694	0.200003	0.00251364	1.26477	UP	AT5G45840	MDIS1	Leucine-rich repeat protein kinase family protein
BnaA03G0075200ZS	0.328984	0.328047	0.212645	0.200408	0.00252088	0.669632	UP	--	--	--
BnaC09G0298400ZS	0.311744	0.29296	0.0555734	0.0713735	0.00262913	2.25201	UP	AT4G11010	NDPK3	nucleoside diphosphate kinase 3 (ndpk3), located to the inter-membrane space in mitochondria
BnaA06G0369400ZS	2.21685	2.12396	0.791921	0.892168	0.00263575	1.366	UP
BnaC08G0041800ZS	0.554212	0.513862	0.143986	0.142189	0.00265775	1.90004	UP	AT4G19960	KUP9	Encodes a potassium ion transmembrane transporter. Also mediates cesium uptake when expressed in E. coli.
Bnascaffold0148G0000200ZS	22.2477	21.1385	7.80922	8.67188	0.00271647	1.39642	UP	--	--	--
BnaC07G0433500ZS	0.36548	0.375507	0.195536	0.210219	0.00280133	0.868839	UP	AT4G20380	LSD1	LSD1 monitors a superoxide-dependent signal and negatively regulates a plant cell death pathway. contains zinc-finger motifs. LSD1 negatively regulates a basal defense pathway that can act upstream or independently of both NIM1/NPR1 function and SA accumulation following avirulent or virulent pathogen challenge
BnaA06G0366600ZS	0.508504	0.490623	0.326085	0.329895	0.00282656	0.607016	UP	AT5G47960	SMG1	Encodes a small molecular weight g-protein.
BnaA05G0287000ZS	16.7495	17.1848	8.99036	9.69032	0.00290728	0.861198	UP	--	--	--
BnaA02G0069600ZS	0.633385	0.682702	0.191981	0.200738	0.00292964	1.74469	UP	AT5G17370	--	Transducin/WD40 repeat-like superfamily protein
BnaA03G0557300ZS	0.36578	0.353994	0.239226	0.23274	0.00293429	0.608862	UP	AT4G36720	HVA22K	HVA22-like protein K
BnaC09G0101500ZS	0.374227	0.389393	0.164662	0.181752	0.00298603	1.14036	UP	AT5G66210	CPK28	member of Calcium Dependent Protein Kinase
BnaC05G0268900ZS	0.167309	0.168952	0.0479952	0.0606001	0.00310293	1.63062	UP	--	--	--
BnaA03G0109400ZS	0.564289	0.564884	0.284279	0.250922	0.00313998	1.07711	UP	AT5G57840	--	encodes a protein whose sequence is similar to anthranilate N-hydroxycinnamoyl/benzoyltransferase from Dianthus caryophyllus (gi:2239091)
BnaA10G0194900ZS	0.506954	0.497804	0.321359	0.301819	0.00318212	0.689131	UP	AT5G17440	LUC7B	LUC7 related protein
BnaC03G0664400ZS	0.674693	0.743387	0.0812226	0.0973275	0.00322445	2.98954	UP	AT2G32060	--	Ribosomal protein L7Ae/L30e/S12e/Gadd45 family protein
BnaA09G0682700ZS	0.466705	0.484818	0.250906	0.267651	0.00323012	0.875738	UP	AT1G04590	--	--
BnaC09G0101700ZS	0.299574	0.298682	0.114151	0.0917659	0.00324454	1.5387	UP	--	--	--
BnaC04G0007000ZS	0.548725	0.555348	0.216594	0.175357	0.00342201	1.49409	UP	AT2G47350	IES2A	HIT zinc finger ;PAPA-1-like conserved region
BnaA07G0341300ZS	0.532896	0.56049	0.309729	0.303998	0.00343446	0.833134	UP	AT1G73805	SARD1	Encodes SAR Deficient 1 (SARD1), a key regulator for ICS1 (Isochorismate Synthase 1) induction and salicylic acid (SA) synthesis.
BnaC09G0131200ZS	0.624748	0.66015	0.341613	0.342593	0.00345808	0.909153	UP	AT2G20300	ALE2	Encodes ABNORMAL LEAF SHAPE 2 (ALE2), a receptor-like protein kinase (RLK) with a cluster of basic amino acid residues followed by a cysteine-containing sequence in the putative extracellular domain. Function together with ACR4 (Arabidopsis homolog of the Crinkly4) and ALE1 in positively regulating protoderm-specific gene expression and for the formation of leafy organs. ale2 mutants have various…
BnaC08G0479000ZS	0.403063	0.382313	0.211179	0.203924	0.0035058	0.919915	UP	AT1G16420	MCP2e	Encodes a metacaspase (cysteine-type endopeptidase) that is involved in promoting programmed cell death in response to hydrogen peroxide (H2O2), UV light, and methyl viologen (MV). Transcript levels rise in response to UV-C, H2O2, and MV. In vitro assays demonstrate that this enzyme has a preference for cleaving after an arginine residue, and it has a pH optimum of 8.0.
BnaC08G0446500ZS	0.85651	0.796486	0.186812	0.230914	0.00361609	1.98445	UP	AT2G22240	MIPS2	** Referred to as MIPS1 in Mitsuhashi et al 2008. Myo-inositol-1-phosphate synthase isoform 2. Expressed in leaf, root and silique. Immunolocalization experiments with an antibody recognizing MIPS1, MIPS2, and MIPS3 showed endosperm localization.
BnaC04G0459800ZS	0.775897	0.849585	0.131987	0.164708	0.00366146	2.45382	UP
BnaC09G0081200ZS	0.449361	0.467992	0.30397	0.298773	0.00375833	0.605936	UP	AT5G64170	LNK1	--
BnaC08G0513900ZS	0.560696	0.527693	0.277211	0.270318	0.00386332	0.991185	UP	AT1G11310	PMR2	A member of a large family of seven-transmembrane domain proteins specific to plants, homologs of the barley mildew resistance locus o (MLO) protein. The Arabidopsis genome contains 15 genes encoding MLO proteins, with localization in plasma membrane. Phylogenetic analysis revealed four clades of closely-related AtMLO genes. ATMLO2 belongs to the clade IV, with AtMLO3, AtMLO6 and AtMLO12. The gen…
BnaC07G0423600ZS	0.806127	0.859699	0.406113	0.40609	0.00391558	1.03632	UP	AT4G18520	SEL1	Pentatricopeptide repeat (PPR) superfamily protein
BnaA09G0472400ZS	0.816734	0.874573	0.263974	0.21412	0.00393801	1.82277	UP	AT3G50660	SNP2	Encodes a 22&#945; hydroxylase whose reaction is a rate-limiting step in brassinosteroid biosynthetic pathway. The protein is a member of CYP90B gene family. CLM is an epi-allele with small, compressed rosette, reduced internode length, and reduced fertility, appears in selfed ddm mutant plants possibly due to loss of cytosine methylation. Transcripts accumulate in actively growing tissues, and G…
BnaC05G0542600ZS	0.405647	0.378278	0.168905	0.160443	0.00394792	1.2511	UP	AT3G04870	ZDS	Involved in the biosynthesis of carotenes and xanthophylls, reduces zeta-carotene to lycopene.
BnaC05G0121800ZS	0.630655	0.664448	0.287971	0.254041	0.00401906	1.25667	UP	AT1G14860	NUDT18	nudix hydrolase homolog 18
BnaA01G0366700ZS	0.637723	0.663738	0.414816	0.428241	0.00405359	0.626432	UP	AT3G12560	TRFL9	--
BnaA06G0272300ZS	0.656844	0.707987	0.275065	0.282801	0.00408347	1.29073	UP	AT5G61910	--	DCD (Development and Cell Death) domain protein
BnaA01G0070000ZS	0.941401	0.949347	0.584112	0.535301	0.00408537	0.756215	UP	AT4G30360	CNGC17	member of Cyclic nucleotide gated channel family
BnaA10G0152400ZS	1.01855	1.09991	0.392189	0.358796	0.00411042	1.49616	UP	AT1G53540	HSP17.6C	HSP20-like chaperones superfamily protein
BnaC04G0072800ZS	0.539628	0.586884	0.150842	0.172678	0.00417658	1.79994	UP	AT2G39518	CASPL4D2	Uncharacterised protein family (UPF0497)
BnaC09G0102700ZS	0.458026	0.489507	0.218461	0.205469	0.00420374	1.16035	UP	AT5G66050	--	Wound-responsive family protein
BnaC02G0179300ZS	0.952974	0.930263	0.492751	0.543173	0.00423275	0.862297	UP	AT5G53070	--	Ribosomal protein L9/RNase H1
BnaC07G0143300ZS	0.571006	0.594709	0.237576	0.273345	0.00426697	1.19004	UP	AT1G28540	--	--
BnaA07G0085400ZS	0.775897	0.787922	0.162445	0.237912	0.00428639	1.96571	UP	AT1G30260	--	--
BnaA07G0090700ZS	0.532896	0.497098	0.228777	0.21412	0.0043132	1.21759	UP	AT1G29400	ML5	A member of mei2-like gene family, predominantly plant-based family of genes encoding RNA binding proteins with characteristic presence of a highly conserved RNA binding motif first described in the mei2 gene of the fission yeast S. pombe. In silico analyses reveal nine mei2 -like genes in A. thaliana. They were grouped into four distinct clades, based on overall sequence similarity and subfamily…
BnaA07G0320600ZS	0.927983	0.991182	0.483206	0.490693	0.00450226	0.978636	UP	AT1G70700	TIFY7	JAZ9 is a protein presumed to be involved in jasmonate signaling. JAZ9 transcript levels rise in response to a jasmonate stimulus. JAZ9 can interact with the COI1 F-box subunit of an SCF E3 ubiquitin ligase in a yeast-two-hybrid assay only in the presence of jasmonate-isoleucine (JA-ILE) or coronatine. The Jas domain appears to be important for JAZ9-COI1 interactions in the presence of coronatine…
BnaA04G0008700ZS	0.520826	0.574514	0.150842	0.142747	0.00455484	1.89951	UP	AT3G61850	DAG1	Zinc finger transcription factor of the Dof family involved in the control of seed germination.
BnaC08G0007100ZS	0.753728	0.778786	0.383961	0.334563	0.0045986	1.09279	UP	AT1G03830	GBPL1	guanylate-binding family protein
BnaA09G0210700ZS	0.557416	0.528322	0.262101	0.285494	0.00477784	0.987494	UP	AT5G46910	JMJ13	Transcription factor jumonji (jmj) family protein / zinc finger (C5HC2 type) family protein
BnaC02G0439600ZS	0.653686	0.693714	0.36218	0.376279	0.00482178	0.867589	UP	AT2G03240	--	EXS (ERD1/XPR1/SYG1) family protein
BnaA10G0275300ZS	0.820861	0.758558	0.30937	0.27896	0.00485768	1.4247	UP	AT5G05365	AtHMP44	Heavy metal transport/detoxification superfamily protein
BnaC09G0575400ZS	0.632997	0.633853	0.390536	0.422396	0.00489396	0.640038	UP	AT5G07290	ML4	--
BnaC03G0369200ZS	0.673844	0.628644	0.310983	0.324196	0.00494314	1.03603	UP	AT3G07195	--	RPM1-interacting protein 4 (RIN4) family protein
BnaC08G0098000ZS	0.192769	0.212396	0.0527947	0.0594779	0.00497368	1.85151	UP	--	--	--
BnaA09G0262300ZS	0.750705	0.71715	0.435609	0.458653	0.00499861	0.71494	UP	AT4G09150	--	--
BnaA10G0267800ZS	0.517265	0.469722	0.15938	0.155724	0.00499879	1.6472	UP	AT5G06440	--	--
BnaC08G0369600ZS	0.718423	0.741383	0.417446	0.452947	0.00510577	0.746037	UP	AT3G57080	RPB5B	Non-catalytic subunit unique to Nuclear DNA-dependent RNA polymerase V; homologous to budding yeast RPB5.
BnaA09G0612700ZS	0.536334	0.554077	0.325893	0.297389	0.00512634	0.806914	UP	AT1G18680	M20	HNH endonuclease domain-containing protein
BnaA01G0015800ZS	0.44337	0.471992	0.219978	0.19826	0.00518296	1.13002	UP	AT4G37290	prePIP2	--
BnaC07G0052600ZS	0.598197	0.652094	0.204875	0.171296	0.00523597	1.7328	UP	AT2G17480	MLO8	A member of a large family of seven-transmembrane domain proteins specific to plants, homologs of the barley mildew resistance locus o (MLO) protein. The Arabidopsis genome contains 15 genes encoding MLO proteins, with localization in plasma membrane. Phylogenetic analysis revealed four clades of closely-related AtMLO genes. ATMLO8 belongs to the clade III, with AtMLO5, AtMLO7, AtMLO9, and AtMLO1…
BnaA03G0204000ZS	0.734331	0.773584	0.474922	0.482649	0.00524272	0.655105	UP	AT2G41740	VLN2	Encodes a protein with high homology to animal villin.
BnaA02G0043500ZS	1.14665	1.12098	0.527947	0.606675	0.00529897	0.998971	UP	AT5G12050	BG1	--
BnaC03G0591700ZS	0.963273	0.950644	0.570754	0.510969	0.00534797	0.823198	UP	AT3G42660	EOL1	transducin family protein / WD-40 repeat family protein
BnaC07G0262100ZS	0.759103	0.69842	0.317755	0.311672	0.00538012	1.21141	UP	AT5G47710	--	Calcium-dependent lipid-binding (CaLB domain) family protein
BnaC03G0585300ZS	19.9842	21.9805	6.52513	7.14486	0.0054133	1.61817	UP	--	--	--
BnaA08G0003000ZS	0.758844	0.783077	0.393372	0.43986	0.00542761	0.887939	UP	AT1G55760	SIBP1	BTB/POZ domain-containing protein
BnaA08G0212500ZS	0.637589	0.667263	0.365502	0.393006	0.0054395	0.78265	UP	AT1G28490	SYP61	Encodes one of 24 Arabidopsis syntaxins. Its mRNA has been shown to be expressed.
BnaA07G0006500ZS	0.682946	0.692412	0.434372	0.468134	0.0054538	0.607799	UP	AT2G20010	--	Protein of unknown function (DUF810)
BnaA06G0377600ZS	1.21927	1.29285	0.731004	0.698219	0.00548801	0.813671	UP	AT1G19010	--	--
BnaC03G0623800ZS	0.613704	0.578684	0.312721	0.33357	0.00552372	0.883597	UP	AT3G47930	GLDH	L-Galactono-1,4-lactone dehydrogenase, catalyzes the final step of ascorbate biosynthesis
BnaC06G0073500ZS	0.554212	0.571836	0.357257	0.329416	0.00557716	0.713572	UP	AT1G53025	UBC26	Ubiquitin-conjugating enzyme family protein
BnaC08G0369200ZS	0.285146	0.294995	0.197611	0.186669	0.00560247	0.594243	UP	AT3G57040	ATRR4	response regulator ARR9, A two-component response regulator-like protein with a receiver domain with a conserved aspartate residue and a possible phosphorylation site and at the N-terminal half. Appears to interact with histidine kinase like genes ATHP3 and ATHP2
BnaA06G0034800ZS	0.644433	0.602746	0.341613	0.329416	0.00563519	0.894222	UP	AT1G49670	NQR	molecular function has not been defined. Was shown involved in oxidative stress tolerance.
BnaC03G0431400ZS	0.0752634	0.0724078	0.0296045	0.0230237	0.00564869	1.48848	UP	AT5G08160	PK3	Encodes a serine/threonine protein kinase.
BnaA04G0175200ZS	1.10842	1.06198	0.422358	0.505001	0.00576587	1.22677	UP	AT5G45920	GGL28	SGNH hydrolase-type esterase superfamily protein
BnaC07G0529400ZS	0.84034	0.799281	0.493706	0.518573	0.00580398	0.695755	UP	AT4G35985	--	Senescence/dehydration-associated protein-related
BnaC05G0003700ZS	0.711521	0.675361	0.423938	0.400405	0.00583041	0.750529	UP	AT2G42010	PLDBETA1	phospholipase D (PLDbeta)
BnaA04G0202200ZS	0.645494	0.684946	0.379143	0.355759	0.0058782	0.856279	UP	AT2G31090	TAX1	--
BnaC02G0298300ZS	1.55179	1.41597	0.383961	0.267651	0.00590762	2.18729	UP
BnaC03G0502900ZS	0.904576	0.911248	0.405388	0.47731	0.00593862	1.04063	UP	AT2G17290	CPK6	Encodes calcium dependent protein kinase 6 (CPK6), a member of the Arabidopsis CDPK gene family. CDPKs contain an intrinsic Ca2+-activation domain with four EF hand Ca2+-binding sites. CDPKs protein kinases have been proposed to function in multiple plant signal transduction pathways downstream of [Ca2+]cyt elevations, thus transducing various physiological responses. CPK6 is expressed in both gu…
BnaC05G0125100ZS	0.354332	0.351936	0.241473	0.222901	0.00593914	0.604928	UP	AT1G15120	--	Ubiquinol-cytochrome C reductase hinge protein
BnaA02G0224500ZS	0.469094	0.453384	0.28558	0.305886	0.0059621	0.641219	UP	AT1G76900	TLP1	Member of TLP family
BnaC02G0089200ZS	0.28355	0.287022	0.117322	0.1414	0.00603069	1.14101	UP	AT5G18640	--	alpha/beta-Hydrolases superfamily protein
BnaA04G0231500ZS	0.58885	0.556276	0.321359	0.296124	0.00604339	0.891035	UP	AT2G36000	SL1	Mitochondrial transcription termination factor family protein
BnaA10G0265600ZS	0.530242	0.518179	0.273455	0.308087	0.00611356	0.850264	UP	AT5G06730	--	Peroxidase superfamily protein
BnaC06G0286200ZS	0.937897	0.961372	0.432159	0.504492	0.00618324	1.01986	UP	AT1G73080	PEPR1	Encodes a leucine-rich repeat receptor kinase. Functions as a receptor for AtPep1 to amplify innate immunity response to pathogen attacks.
BnaA09G0621100ZS	0.900595	0.823035	0.150842	0.22408	0.00619757	2.20079	UP	AT1G16825	--	Reticulon family protein
BnaC03G0539500ZS	0.580603	0.619489	0.287971	0.314883	0.00621137	0.993264	UP	AT5G63690	--	Nucleic acid-binding, OB-fold-like protein
BnaC07G0485200ZS	0.533377	0.57599	0.254871	0.272517	0.00622203	1.0728	UP	AT4G28740	--	--
BnaA04G0163200ZS	0.900965	0.845985	0.508025	0.523562	0.0063182	0.759974	UP	AT2G24580	--	FAD-dependent oxidoreductase family protein
BnaC08G0325300ZS	0.341054	0.333766	0.230977	0.21412	0.00633013	0.60038	UP	--	--	--
BnaC03G0211400ZS	0.642886	0.609656	0.359964	0.383499	0.0063374	0.752526	UP	AT2G37690	--	phosphoribosylaminoimidazole carboxylase, putative / AIR carboxylase, putative
BnaA05G0459500ZS	0.671772	0.679668	0.175982	0.249807	0.00637212	1.66629	UP	--	--	--
BnaC08G0271200ZS	0.42967	0.39901	0.17841	0.198011	0.00641204	1.13847	UP	AT1G22070	TGA3	Encodes a transcription factor. Like other TGAla-related factors, TGA3 has a highly conserved bZIP region and exhibits similar DNA-binding properties.
BnaC08G0442700ZS	0.7139	0.675806	0.323233	0.271645	0.00644668	1.22411	UP	AT2G22620	RGIL6	Rhamnogalacturonate lyase family protein
BnaA07G0211400ZS	0.365415	0.357606	0.211179	0.185717	0.00660298	0.865277	UP	AT3G60260	ELMOD_A	ELMO/CED-12 family protein
BnaC01G0185100ZS	0.314553	0.294995	0.185245	0.185297	0.00662974	0.718105	UP	AT5G12380	ANNAT8	annexin 8
BnaA02G0184800ZS	0.797822	0.777522	0.522614	0.480131	0.00669379	0.651712	UP	AT1G69900	--	Actin cross-linking protein
BnaC03G0482200ZS	0.606169	0.579076	0.376977	0.350767	0.00672073	0.703682	UP	AT2G06050	OPR3	Encodes a 12-oxophytodienoate reductase that is required for jasmonate biosynthesis. Mutants are male sterile and defective in pollen dehiscence. Shows activity towards 2,4,6-trinitrotoluene.
BnaC04G0470000ZS	0.361777	0.340483	0.222293	0.222685	0.00678329	0.658268	UP	AT2G25930	PYK20	Encodes a nuclear protein that is expressed rhythmically and interacts with phytochrome B to control plant development and flowering through a signal transduction pathway. Required component of the core circadian clock regardless of light conditions.
BnaA01G0049500ZS	0.517265	0.550657	0.114771	0.170323	0.00678563	1.9053	UP	AT4G32900	--	Peptidyl-tRNA hydrolase II (PTH2) family protein
BnaC03G0473300ZS	0.791731	0.849585	0.475152	0.462305	0.00701461	0.808028	UP	AT2G04160	AIR3	isolated from differential screening of a cDNA library from auxin-treated root culture. encodes a protein similar to subtilisin-like serine protease which is believed to be active outside the plant cell.
BnaC05G0154100ZS	0.560758	0.543942	0.329967	0.360684	0.00707746	0.677625	UP	AT1G18390	LRK10L1.2	--
BnaC07G0346800ZS	0.429797	0.427742	0.196445	0.23274	0.00712519	0.998603	UP	AT5G27820	uL18m	Ribosomal L18p/L5e family protein
BnaC08G0227300ZS	0.860578	0.823577	0.532538	0.565765	0.00712857	0.616748	UP	AT1G14130	DAO1	2-oxoglutarate (2OG) and Fe(II)-dependent oxygenase superfamily protein
BnaC07G0400100ZS	0.648324	0.695781	0.363697	0.336119	0.00717961	0.941597	UP	AT4G15260	--	UDP-Glycosyltransferase superfamily protein
BnaA03G0047400ZS	0.48868	0.50765	0.339957	0.318234	0.00719622	0.598117	UP	AT5G11970	--	Protein of unknown function (DUF3511)
BnaA09G0132700ZS	0.728827	0.66802	0.29565	0.322647	0.00722332	1.1758	UP	AT5G16640	--	Pentatricopeptide repeat (PPR) superfamily protein
BnaC09G0206500ZS	0.54242	0.547413	0.172391	0.230914	0.00724026	1.43416	UP	AT1G54890	--	Late embryogenesis abundant (LEA) protein-related
BnaA03G0145800ZS	0.373027	0.402366	0.201862	0.212602	0.00740954	0.903681	UP	AT2G30270	--	Protein of unknown function (DUF567)
BnaC06G0127100ZS	0.610764	0.611989	0.28479	0.337255	0.00754611	0.975042	UP	AT1G53210	NCL	Encodes a Na+/Ca 2+ exchanger-like protein that participates in the maintenance of Ca 2+ homeostasis.
BnaA09G0220000ZS	0.55059	0.565371	0.382907	0.353071	0.00759108	0.600553	UP	AT2G01980	SOS1	Encodes a plasma membrane-localized Na+/H+ antiporter SOS1. Functions in the extrusion of toxic Na+ from cells and is essential for plant salt tolerance. Has 12 predicted transmembrane domains in the N-terminal region and a long cytoplasmic tail of approx. 700 aa at the C-terminal side. SOS1 interacts through its predicted cytoplasmic tail with RCD1, a regulator of oxidative-stress responses, sug…
BnaA05G0249200ZS	15.7489	17.1327	8.41674	8.59125	0.00763319	0.951068	UP	--	--	--
Bnascaffold0417G0000200ZS	13.1037	12.615	6.73207	7.61863	0.0078365	0.841699	UP	--	--	--
BnaA04G0051400ZS	0.446106	0.418529	0.195168	0.223864	0.00788312	1.04503	UP	AT3G54020	AtIPCS1	Inositol phosphorylceramide synthase
BnaC03G0323500ZS	0.407176	0.425899	0.230377	0.255243	0.00792994	0.778619	UP	AT4G02740	--	F-box/RNI-like superfamily protein
BnaC04G0303100ZS	0.762187	0.723957	0.490305	0.460423	0.00811342	0.644469	UP	AT3G57010	--	Calcium-dependent phosphotriesterase superfamily protein
BnaC07G0260300ZS	0.640808	0.691523	0.25282	0.189946	0.00814526	1.58934	UP	AT5G47520	RABA5a	RAB GTPase homolog A5A
BnaC09G0611300ZS	0.649766	0.627534	0.365502	0.40609	0.00827068	0.727187	UP	AT5G03310	SAUR44	SAUR-like auxin-responsive protein family
BnaC01G0098900ZS	0.621656	0.630187	0.382907	0.334563	0.00833391	0.803063	UP	AT4G28940	--	Phosphorylase superfamily protein
BnaA08G0084500ZS	0.733956	0.764108	0.475152	0.511332	0.00836917	0.602732	UP	AT1G31500	HESP	DNAse I-like superfamily protein
BnaC06G0274300ZS	0.621799	0.619489	0.263974	0.324425	0.00847651	1.07697	UP	AT1G74970	TWN3	ribosomal protein S9, nuclear encoded component of the chloroplast ribosome
BnaC02G0547400ZS	0.71352	0.727099	0.420356	0.469651	0.00851343	0.6948	UP	AT5G65207	--	--
BnaA07G0123000ZS	0.900595	0.874573	0.39596	0.475823	0.0085345	1.02591	UP
BnaC07G0472000ZS	0.556474	0.591924	0.360103	0.374982	0.00854189	0.64364	UP	AT4G27040	VPS22	EAP30/Vps36 family protein
BnaA09G0685900ZS	0.35268	0.310425	0.0931671	0.0738346	0.00865936	1.98938	UP	AT1G03930	CKL9BETA	Phosphorylates serine, threonine, and tyrosine
BnaC02G0001900ZS	0.793871	0.726619	0.385259	0.356867	0.00868148	1.0348	UP	AT2G04660	APC2	a highly conserved ubiquitin-protein ligase involved in cell cycle regulation
BnaC08G0017600ZS	2.21685	1.94697	0.175982	0.382358	0.00876288	2.89869	UP	AT1G05280	--	Protein of unknown function (DUF604)
BnaC06G0442000ZS	0.714778	0.734349	0.466239	0.416345	0.00883069	0.715378	UP	AT1G78570	ROL1	Encodes a UDP-L-Rhamnose synthase involved in the biosynthesis of rhamnose, a major monosaccharide component of pectin. Catalyzes the conversion of UDP-D-Glc to UDP-L-Rha. The dehydrogenase domain of RHM1 was shown to catalyze the conversion of UDP-D-Glc to the reaction intermediate UDP-4-keto-6-deoxy-D-Glc using recombinant protein assay but the activity of the full-length protein was not determ…
BnaC03G0098100ZS	1.0869	1.11025	0.707674	0.629766	0.00883146	0.716162	UP	AT5G19980	GONST4	Encodes a Golgi-localized nucleotide-sugar transporter.
BnaC06G0022100ZS	0.29558	0.341351	0.0293304	0.0549027	0.00887929	2.91868	UP	--	--	--
BnaC03G0496800ZS	0.89023	0.838406	0.511619	0.548357	0.00890531	0.705603	UP	AT2G16710	--	Iron-sulphur cluster biosynthesis family protein
BnaC05G0022700ZS	0.910491	0.810459	0.286344	0.321181	0.00892937	1.50219	UP	AT1G03780	TPX2	Homolog of vertebrate TPX2. Protein has three domains involved in nuclear targeting, one in nuclear export and two in microtubule binding. Involved in mitotic spindle assembly during late prophase and early prometaphase.
BnaA09G0261500ZS	0.615791	0.556276	0.248446	0.267651	0.00896675	1.18334	UP	AT4G09680	CTC1	Encodes CTC1 (Conserved Telomere Maintenance Component 1) involved in telomere maintenance.
BnaC04G0013100ZS	0.755744	0.785743	0.527947	0.487364	0.00907447	0.602401	UP	AT2G46650	CYTB5-C	member of Cytochromes b5
BnaA06G0237600ZS	27.0285	24.5042	12.354	12.6782	0.00909717	1.04171	UP	--	--	--
BnaC02G0500800ZS	0.588937	0.550657	0.371185	0.36979	0.00910839	0.621024	UP	AT5G27030	TPR3	TOPLESS-related 3
BnaC06G0112500ZS	0.604595	0.630551	0.292056	0.344122	0.00930274	0.95718	UP	AT3G21090	ABCG15	ABC-2 type transporter family protein
BnaC04G0586900ZS	0.513297	0.554955	0.321359	0.314129	0.00941045	0.749315	UP	AT2G42280	FBH4	basic helix-loop-helix (bHLH) DNA-binding superfamily protein
BnaC01G0493500ZS	0.657321	0.588568	0.272489	0.272517	0.00948598	1.19283	UP	AT3G01680	SEOR1	Encodes a protein localized to phloem filaments that is required for phloem filament formation.
BnaA03G0289600ZS	0.372834	0.37525	0.25068	0.22389	0.00953349	0.656578	UP	AT3G02800	PFA-DSP3	Encodes an atypical dual-speci&#64257;city phosphatase.
BnaC09G0273100ZS	0.58011	0.58409	0.383151	0.339748	0.00961419	0.687471	UP	AT4G05010	FBS3	F-box family protein
BnaC02G0199900ZS	0.738949	0.785424	0.4707	0.499614	0.00961867	0.651692	UP	AT1G65380	CLV2	Receptor-like protein containing leucine-rich repeats. Regulates both meristem and organ development in Arabidopsis.
BnaC07G0454400ZS	0.906892	0.833454	0.404759	0.45218	0.00965073	1.02211	UP	AT4G23840	--	Leucine-rich repeat (LRR) family protein
BnaC05G0228800ZS	0.665054	0.637189	0.211179	0.118956	0.00967946	1.97987	UP
BnaC03G0172100ZS	1.18232	1.22536	0.535598	0.649382	0.00975466	1.02278	UP	AT2G30500	NET4B	Kinase interacting (KIP1-like) family protein
BnaC05G0288800ZS	0.31524	0.31544	0.135907	0.168409	0.00977317	1.05134	UP	--	--	--
BnaC02G0409100ZS	0.59116	0.634239	0.286344	0.329416	0.0098379	0.99281	UP	AT5G46530	--	AWPM-19-like family protein
BnaC08G0422800ZS	0.684212	0.743387	0.389014	0.411173	0.00999104	0.835182	UP	AT2G26260	AT3BETAHSD/D2	Encodes an enzyme with 3&#946;-hydroxysteroid dehydrogenase/C4-decarboxylase activity <i>in vitro</i>. The activity of the enzyme was determined using microsomal extracts of yeast overexpressing the <i>Arabidopsis</i> gene. Cytosolic fractions failed to be associated to the activity, leading to the speculation that the enzyme is membrane-bound.
BnaC02G0396600ZS	0.445257	0.416325	0.287014	0.280747	0.00999898	0.601706	UP	AT5G45020	--	Glutathione S-transferase family protein
BnaA05G0112000ZS	0.601716	0.602746	0.16425	0.244709	0.010077	1.55836	UP	AT1G76310	CYCB2;4	core cell cycle genes
BnaC06G0170400ZS	0.501245	0.468275	0.244294	0.276193	0.0102769	0.89741	UP	AT5G41100	--	--
BnaA03G0233800ZS	0.710528	0.659161	0.188553	0.0892168	0.010327	2.30189	UP	AT2G27480	--	Calcium-binding EF-hand family protein
BnaA09G0312000ZS	16.3493	15.266	10.119	9.5462	0.0103519	0.684976	UP	--	--	--
BnaC09G0490100ZS	0.787564	0.725255	0.446724	0.454195	0.010355	0.747771	UP	AT3G03341	--	--
BnaA10G0251100ZS	0.532478	0.587882	0.268659	0.286084	0.01038	1.01407	UP	AT5G08740	NDC1	NAD(P)H dehydrogenase C1
Bnascaffold0204G0000400ZS	12.1927	12.5107	7.19532	8.10684	0.0103811	0.69097	UP	--	--	--
BnaA06G0186200ZS	0.787564	0.728811	0.234643	0.131992	0.0104176	2.04821	UP	AT5G60690	REV	REVOLUTA regulates meristem initiation at lateral positions. a member of a small homeodomain-leucine zipper family. Has overlapping functions with PHAVOLUTA and PHABULOSA.
BnaC04G0436300ZS	0.630949	0.603872	0.415758	0.379299	0.0104971	0.635171	UP	AT2G22360	DJA6	DNAJ heat shock family protein
BnaA05G0217400ZS	14.1145	15.1094	9.39872	9.71717	0.0105128	0.612373	UP	--	--	--
BnaC05G0103000ZS	0.396699	0.401831	0.194187	0.2323	0.0105165	0.904842	UP	AT1G15880	GOS11	Golgi SNARE 11 protein (GOS11)
BnaC05G0154900ZS	0.618384	0.581561	0.299014	0.343401	0.0105316	0.901391	UP	AT1G18470	PPRT3	Transmembrane Fragile-X-F-associated protein
BnaC07G0480900ZS	0.495874	0.513862	0.263974	0.305886	0.0105808	0.825299	UP	AT4G28150	--	Protein of unknown function (DUF789)
BnaA03G0396900ZS	0.991748	0.923462	0.38257	0.469305	0.0106063	1.16879	UP	AT2G16070	PDV2	An integral outer envelope membrane protein (its homolog in A thaliana PDV1), component of the plastid division machinery. Similar to ARC6, PDV2 localizes to a continuous ring at the division site in wild-type plants. PDV1 and PDV2 are required for localization of ARC5 at the chloroplast division site.
BnaC05G0368100ZS	0.738949	0.6822	0.43781	0.426841	0.0106161	0.716868	UP	AT3G21465	--	--
BnaA09G0358200ZS	42.7852	39.2933	5.63144	11.4198	0.0106349	2.26713	UP	--	--	--
BnaC08G0120000ZS	0.483676	0.445021	0.279501	0.275298	0.0106424	0.743242	UP	AT1G31500	HESP	DNAse I-like superfamily protein
BnaC05G0218400ZS	0.963847	1.06198	0.457554	0.380659	0.0108413	1.27312	UP	AT1G26840	ORC6	Origin Recognition Complex subunit 6. Involved in the initiation of DNA replication. Regulated transcriptionally during cell cycle, peaking at G1/S-phase. Target of E2F/DF family of transcription factors.
BnaC02G0015300ZS	0.684615	0.617606	0.327178	0.334563	0.0108981	0.976634	UP	AT5G04130	GYRB2	DNA GYRASE B2
BnaA09G0404600ZS	0.304273	0.307821	0.206028	0.182786	0.0109071	0.654673	UP	AT1G30825	DIS2	Involved in trichome maturation. mutant displays enlarged trichomes
BnaA03G0233900ZS	1.37445	1.25507	0.686331	0.732517	0.0109942	0.890076	UP	AT2G27430	--	ARM repeat superfamily protein
BnaC07G0475600ZS	0.676327	0.627075	0.373426	0.400312	0.0110378	0.752364	UP	AT4G27390	--	--
BnaC01G0104700ZS	0.407176	0.418356	0.196919	0.14713	0.0110467	1.26271	UP	AT4G28400	--	Protein phosphatase 2C family protein
BnaC09G0041500ZS	0.764969	0.814186	0.509092	0.468388	0.0110808	0.692013	UP	AT5G28150	--	Plant protein of unknown function (DUF868)
BnaC01G0333500ZS	0.803607	0.766986	0.464593	0.515475	0.0110829	0.680356	UP	AT1G60560	--	SWIM zinc finger family protein
BnaC03G0422200ZS	0.468761	0.496387	0.263974	0.297389	0.011334	0.781816	UP	AT3G17410	CARK1	Protein kinase superfamily protein
BnaA01G0162500ZS	0.426317	0.475514	0.194507	0.21412	0.0113358	1.14207	UP	AT4G26860	--	Predicted pyridoxal phosphate-dependent enzyme, YBL036C type
BnaA07G0330900ZS	0.397047	0.36857	0.248446	0.239477	0.0113629	0.649972	UP	AT1G72170	--	Domain of unknown function (DUF543)
BnaC03G0495100ZS	0.0878629	0.0784013	0.0391072	0.0392882	0.0114009	1.08464	UP	--	--	--
BnaA09G0038200ZS	0.65937	0.612265	0.367022	0.395393	0.0114612	0.738036	UP	AT3G27100	ENY2	--
BnaC05G0526800ZS	0.541896	0.601363	0.296391	0.281737	0.011542	0.98369	UP	AT3G06370	NHX4	member of Sodium proton exchanger family
BnaC05G0476200ZS	0.559205	0.620272	0.297291	0.308966	0.0115606	0.960148	UP	AT3G12670	emb2742	CTP synthase family protein
BnaC05G0229800ZS	0.537418	0.546685	0.350728	0.30504	0.0116386	0.725245	UP	AT1G25220	WEI7	Catalyzes the first step of tryptophan biosynthesis: Chorismate L-Glutamine = Anthranilate Pyruvate L-Glutamate. Functions as a heterocomplex with anthranilate synthase alpha subunit (ASA1 or ASA2).
BnaC03G0683500ZS	0.704419	0.632416	0.337886	0.340646	0.0117698	0.978332	UP	AT4G37990	ELI3-2	Encodes an aromatic alcohol:NADP+ oxidoreductase whose mRNA levels are increased in response to treatment with a variety of phytopathogenic bacteria. Though similar to mannitol dehydrogenases, this enzyme does not have mannitol dehydrogenase activity.
BnaA05G0074500ZS	0.923687	0.838406	0.436922	0.37786	0.01178	1.11281	UP	AT2G38010	AtNCER2	Neutral/alkaline non-lysosomal ceramidase
BnaC01G0106100ZS	0.524416	0.520371	0.228962	0.286768	0.0117852	1.01852	UP	AT5G47100	CBL9	member of AtCBLs (Calcineurin B-like Calcium Sensor Proteins. CBL9 interacts with and targets CIPK23 to the plasma membrane in vivo.
BnaA09G0206700ZS	1.05009	1.06198	0.140786	0.321181	0.0117917	2.1928	UP	AT5G46230	SVB3	Protein of unknown function, DUF538
BnaA08G0163400ZS	0.615079	0.676867	0.323705	0.351291	0.0118167	0.936595	UP	AT4G28440	--	Nucleic acid-binding, OB-fold-like protein
BnaC09G0104200ZS	0.77911	0.802757	0.428439	0.342546	0.0118563	1.03685	UP	AT2G12400	--	--
BnaC04G0104400ZS	1.03073	0.955783	0.277867	0.401476	0.0120095	1.54803	UP	AT2G36090	--	F-box family protein
BnaC04G0370400ZS	0.169904	0.176997	0.107165	0.118557	0.0120412	0.619978	UP	--	--	--
BnaA07G0154500ZS	0.412502	0.444705	0.272071	0.281737	0.012059	0.630257	UP	AT2G27350	OTLD1	Encodes an otubain-like histone deubiquitinase involved in chromatin modification and regulation of plant gene expression.
BnaC02G0433900ZS	0.498791	0.44715	0.239976	0.228161	0.0120705	1.01482	UP	AT2G02240	MEE66	F-box family protein
BnaA06G0227900ZS	24.4645	24.2486	6.61584	10.1577	0.0121187	1.53813	UP	--	--	--
BnaC01G0487300ZS	1.00029	0.927364	0.60917	0.568075	0.0122147	0.711429	UP	AT3G06440	GALT3	Galactosyltransferase family protein
BnaA02G0292900ZS	0.608853	0.564178	0.355149	0.376024	0.0122269	0.681956	UP	AT5G45340	CYP707A3	Encodes a protein with ABA 8'-hydroxylase activity; involved in ABA catabolism. Mutant analyses show that disruption in the gene results in more drought tolerance whereas overexpression results in increased transpiration rate and reduced drought tolerance. Gene involved in postgermination growth. Plant P450 CYP707A3, ABA 8'-hydroxylase, binds enantioselectively (+)-ABA but not (-)-ABA, whereas th…
BnaA09G0488100ZS	0.247416	0.222599	0.124475	0.122744	0.0122399	0.926913	UP	--	--	--
Bnascaffold3250G0000100ZS	22.8459	23.7429	9.82628	12.3964	0.0122527	1.06794	UP	--	--	--
BnaC01G0428900ZS	0.606008	0.572691	0.377105	0.406432	0.0123823	0.589121	UP	AT3G15690	BLP2	Single hybrid motif superfamily protein
BnaC09G0316600ZS	0.288749	0.28431	0.133268	0.163966	0.0124107	0.947083	UP	AT4G06676	--	--
BnaA02G0200800ZS	0.682411	0.631448	0.420931	0.431444	0.0124767	0.62425	UP	AT1G72520	LOX4	PLAT/LH2 domain-containing lipoxygenase family protein
BnaC09G0065400ZS	0.771403	0.825985	0.490617	0.526667	0.0124773	0.650992	UP	AT5G61150	VIP4	Encodes highly hydrophilic protein involved in positively regulating FLC expression. Mutants are early flowering and show a loss of FLC expression in the absence of cold.
BnaA01G0025800ZS	0.643601	0.612681	0.383961	0.331377	0.0124791	0.812463	UP	AT4G35970	APX5	Encodes a microsomal ascorbate peroxidase APX5. Ascorbate peroxidases are enzymes that scavenge hydrogen peroxide in plant cells. Eight types of APX have been described for Arabidopsis: three cytosolic (APX1, APX2, APX6), two chloroplastic types (stromal sAPX, thylakoid tAPX), and three microsomal (APX3, APX4, APX5) isoforms.
BnaC06G0319100ZS	0.81378	0.766986	0.493886	0.535301	0.0125928	0.619119	UP	AT1G67690	PSPM3	Zincin-like metalloproteases family protein
BnaC07G0019300ZS	0.778255	0.746257	0.476855	0.41177	0.01276	0.7787	UP	AT2G19870	--	tRNA/rRNA methyltransferase (SpoU) family protein
BnaC04G0148400ZS	0.554212	0.51664	0.27375	0.219611	0.0127731	1.11804	UP	AT2G32235	--	--
BnaC07G0528900ZS	0.484936	0.455135	0.314522	0.290333	0.0128578	0.636181	UP	AT4G35905	--	--
BnaC09G0528900ZS	0.484139	0.488398	0.259912	0.201497	0.0128781	1.07571	UP	AT5G13190	GILP	Encodes a plasma membrane localized LITAF domain protein that interacts with LSD1 and acts as a negative regulation of hypersensitive cell death.
BnaC07G0462700ZS	0.57209	0.5149	0.254871	0.281737	0.012925	1.0184	UP	AT4G25225	--	--
BnaC05G0159800ZS	0.711065	0.796486	0.374672	0.34365	0.0130016	1.0695	UP	--	--	--
BnaC09G0235300ZS	0.354239	0.398243	0.169246	0.183216	0.0130605	1.09419	UP	AT3G11170	FADD	Chloroplastic enzyme responsible for the synthesis of 16:3 and 18:3 fatty acids from galactolipids, sulpholipids and phosphatidylglycerol. Uses ferredoxin as electron donor. Gene expression is induced by wounding in shoot and root. The wound-response in shoot is independent of jasmonic acid mediated pathway whereas the root response is mediated by jasmonic acid.
BnaA09G0319300ZS	21.1062	19.1157	8.89968	10.3005	0.0131432	1.06686	UP	--	--	--
BnaC01G0161300ZS	0.838807	0.739961	0.32489	0.267651	0.0131499	1.41381	UP	AT4G23030	--	MATE efflux family protein
BnaC05G0211500ZS	0.698587	0.698467	0.416885	0.475491	0.0132184	0.646664	UP	AT1G70140	FORMIN 8	Encodes a group I formin. Binds to F-actin barbed ends. Has severing actin filaments activity. Binds profilin. Involved in the initiation and tip growth of root hairs through regulation of actin cytoskeleton.
BnaC08G0452100ZS	0.479936	0.435578	0.260106	0.267884	0.0132375	0.794073	UP	AT2G21510	--	DNAJ heat shock N-terminal domain-containing protein
BnaC09G0212700ZS	0.516136	0.479477	0.329645	0.310319	0.0133075	0.637593	UP	AT1G47830	AP2S	SNARE-like superfamily protein
BnaC03G0166200ZS	0.455442	0.415089	0.203769	0.234194	0.0133762	0.991085	UP	AT5G50810	TIM8	Encodes a small zinc finger-like protein that is a component of the mitochondrial protein import apparatus.
BnaC05G0151600ZS	0.554212	0.54574	0.372668	0.326624	0.0133804	0.653472	UP	AT1G18030	--	Protein phosphatase 2C family protein
[truncated: 44,017 more rows]

## Sheet: TE_WCS417_6h-TE_WCS417_30m
Table S. Results of differential translation efficiency gene analysis.
[truncated: 44,283 more rows]
